# Supplementary material for: Genome-wide survey of putative RNA-binding proteins encoded in the human proteome
Source: Royal Society of Chemistry journal article supplement (doi:10.1039/c5mb00638d), 2015-11-30
Supplement: c5mb00638d1.zip [file c5mb00638d1.zip]

**Supplementary Table 1:** List of putative RNA-binding proteins in the human genome.

| Entry  | Gene names                  | Protein names                                                                                                                                                                                  |
|--------|-----------------------------|------------------------------------------------------------------------------------------------------------------------------------------------------------------------------------------------|
| A0AV96 | RBM47                       | RNA-binding protein 47 (RNA-binding motif protein 47)                                                                                                                                          |
| A0M8Q6 | IGLC7                       | Ig lambda-7 chain C region                                                                                                                                                                     |
| A1KZ92 | PXDNL VPO2                  | Peroxidasin-like protein (EC 1.11.1.7) (Cardiac peroxidase) (Vascular peroxidase 2) (polysomal ribonuclease 1) (PRM1)                                                                          |
| A1L020 | MEX3A RKHD4                 | RNA-binding protein MEX3A (RING finger and KH domain-containing protein 4)                                                                                                                     |
| A1L453 | PRSS38 MPN2                 | Serine protease 38 (EC 3.4.21.-) (Marapsin-2)                                                                                                                                                  |
| A2AJT9 | CXorf23                     | Uncharacterized protein CXorf23                                                                                                                                                                |
| A2PYH4 | HFM1 SEC3D1                 | Probable ATP-dependent DNA helicase HFM1 (EC 3.6.4.12) (SEC63 domain-containing protein 1)                                                                                                     |
| A2RRD8 | ZNF320                      | Zinc finger protein 320                                                                                                                                                                        |
| A2RRH5 | WDR27                       | WD repeat-containing protein 27                                                                                                                                                                |
| A2RTX5 | TARSL2                      | Probable threonine--tRNA ligase 2, cytoplasmic (EC 6.1.1.3) (Threonyl-tRNA synthetase) (ThrRS) (Threonyl-tRNA synthetase-like protein 2)                                                       |
| A4D1E9 | GTPBP10 OBGH2 UG0751c10     | GTP-binding protein 10 (Protein obg homolog 2) (ObgH2)                                                                                                                                         |
| A4D1P6 | WDR91 HSPC049               | WD repeat-containing protein 91                                                                                                                                                                |
| A5A3E0 | POTEF A26C1B                | POTE ankyrin domain family member F (ANKRD26-like family C member 1B) (Chimeric POTE-actin protein)                                                                                            |
| A6NC57 | ANKRD62                     | Ankyrin repeat domain-containing protein 62                                                                                                                                                    |
| A6NC97 | FAM172BP FAM172B            | Putative protein FAM172B (FAM172B pseudogene)                                                                                                                                                  |
| A6NCQ9 | RNF222                      | RING finger protein 222                                                                                                                                                                        |
| A6NDE4 | RBM1B                       | RNA-binding motif protein, Y chromosome, family 1 member B                                                                                                                                     |
| A6NDN8 |                             | Putative ubiquitin-like protein FUBI-like protein ENSP00000310146                                                                                                                              |
| A6NDX5 | ZNF840P C20orf157 ZNF840    | Putative zinc finger protein 840 (Zinc finger protein 840 pseudogene)                                                                                                                          |
| A6NDY0 | PABPN1L EPABP2 PABPNL1      | Embryonic polyadenylate-binding protein 2 (Embryonic poly(A)-binding protein 2) (ePABP-2) (ePABP2) (Embryonic poly(A)-binding protein type II) (Poly(A)-binding protein nuclear-like 1)        |
| A6NE52 | KIAA1875                    | WD repeat-containing protein KIAA1875                                                                                                                                                          |
| A6NEQ0 | RBM1E                       | RNA-binding motif protein, Y chromosome, family 1 member E                                                                                                                                     |
| A6NEY8 | PRORS1P NCRNA00117 PRDXDD1P | Putative prolyl-tRNA synthetase associated domain-containing protein 1 (PrdX deacylase domain-containing protein 1) (Prolyl-tRNA synthetase associated domain-containing protein 1 pseudogene) |
| A6NFI3 | ZNF316                      | Zinc finger protein 316                                                                                                                                                                        |
| A6NFN3 | RBFOX3                      | RNA binding protein fox-1 homolog 3                                                                                                                                                            |

|        |                                          |                                                                                                                                                                                            |
|--------|------------------------------------------|--------------------------------------------------------------------------------------------------------------------------------------------------------------------------------------------|
|        |                                          | (Fox-1 homolog C)                                                                                                                                                                          |
| A6NG73 |                                          | Deleted.                                                                                                                                                                                   |
| A6NGE4 | DCAF8L1 WDR42B                           | DDB1- and CUL4-associated factor 8-like protein 1 (WD repeat-containing protein 42B)                                                                                                       |
| A6NGH8 | ANKRD61                                  | Ankyrin repeat domain-containing protein 61                                                                                                                                                |
| A6NHJ4 | ZNF860                                   | Zinc finger protein 860                                                                                                                                                                    |
| A6NHQ2 | FBLL1                                    | rRNA/tRNA 2'-O-methyltransferase fibrillarin-like protein 1 (EC 2.1.1.-) (Protein-glutamine methyltransferase)                                                                             |
| A6NHY2 | ANKDD1B                                  | Ankyrin repeat and death domain-containing protein 1B                                                                                                                                      |
| A6NI47 | POTEM                                    | Putative POTE ankyrin domain family member M                                                                                                                                               |
| A6NIE9 | PRSS29P ISP2                             | Putative serine protease 29 (EC 3.4.21.-) (Implantation serine proteinase 2-like protein) (ISP2-like protein)                                                                              |
| A6NJ16 | IGHV4OR15-8 VSIG6                        | Putative V-set and immunoglobulin domain-containing-like protein IGHV4OR15-8 (Immunoglobulin heavy variable 4 orphon 15-8) (Putative V-set and immunoglobulin domain-containing protein 6) |
| A6NJL1 | ZSCAN5B                                  | Zinc finger and SCAN domain-containing protein 5B                                                                                                                                          |
| A6NJS3 | IGHV1OR21-1                              | Putative V-set and immunoglobulin domain-containing-like protein IGHV1OR21-1 (Immunoglobulin heavy variable 1 orphon 21-1)                                                                 |
| A6NK39 |                                          | Deleted.                                                                                                                                                                                   |
| A6NK53 | ZNF233                                   | Zinc finger protein 233                                                                                                                                                                    |
| A6NK59 | ASB14                                    | Ankyrin repeat and SOCS box protein 14 (ASB-14)                                                                                                                                            |
| A6NK75 | ZNF98 ZNF739                             | Zinc finger protein 98 (Zinc finger protein 739) (Zinc finger protein F7175)                                                                                                               |
| A6NKF1 | SAC3D1 SHD1                              | SAC3 domain-containing protein 1 (SAC3 homology domain-containing protein 1)                                                                                                               |
| A6NKH3 | RPL37AP8 RPL37L                          | Putative 60S ribosomal protein L37a-like protein (Ribosomal protein L37a pseudogene 8)                                                                                                     |
| A6NM28 | ZFP92                                    | Zinc finger protein 92 homolog (Zfp-92)                                                                                                                                                    |
| A6NMK7 | CPSF4L                                   | Putative cleavage and polyadenylation specificity factor subunit 4-like protein                                                                                                            |
| A6NMX2 | EIF4E1B                                  | Eukaryotic translation initiation factor 4E type 1B                                                                                                                                        |
| A6NN14 | ZNF729                                   | Zinc finger protein 729                                                                                                                                                                    |
| A6NNA2 | SRRM3                                    | Serine/arginine repetitive matrix protein 3                                                                                                                                                |
| A6NNF4 | ZNF726                                   | Zinc finger protein 726                                                                                                                                                                    |
| A6NP11 | ZNF716                                   | Zinc finger protein 716                                                                                                                                                                    |
| A6QL64 | ANKRD36 ANKRD36A KIAA1641 UNQ2430/PRO499 | Ankyrin repeat domain-containing protein 36A                                                                                                                                               |
| A6XGL0 | YJEFN3                                   | YjeF N-terminal domain-containing protein 3 (YjeF_N3) (hYjeF_N3)                                                                                                                           |
| A7E2S9 | ANKRD30BL NCRNA00164                     | Putative ankyrin repeat domain-containing protein 30B-like                                                                                                                                 |

|        |                     |                                                                                                                                             |
|--------|---------------------|---------------------------------------------------------------------------------------------------------------------------------------------|
| A7XYQ1 | SOBP JXC1           | Sine oculis-binding protein homolog (Jackson circler protein 1)                                                                             |
| A8K979 | ERI2 EXOD1 KIAA1504 | ERI1 exoribonuclease 2 (EC 3.1.-.-) (Exonuclease domain-containing protein 1)                                                               |
| A8MQ14 | ZNF850              | Zinc finger protein 850                                                                                                                     |
| A8MQB9 |                     | Deleted.                                                                                                                                    |
| A8MSY0 |                     | Deleted.                                                                                                                                    |
| A8MT65 | ZNF891              | Zinc finger protein 891                                                                                                                     |
| A8MTI9 | PRSS47              | Putative serine protease 47 (EC 3.4.21.-)                                                                                                   |
| A8MTY0 | ZNF724P             | Putative zinc finger protein 724                                                                                                            |
| A8MWD9 | SNRPGP15            | Putative small nuclear ribonucleoprotein G-like protein 15                                                                                  |
| A8MXY4 | ZNF99 C19orf9       | Zinc finger protein 99                                                                                                                      |
| A8MYG8 |                     | Deleted.                                                                                                                                    |
| A9UHW6 | MIF4GD SLIP1        | MIF4G domain-containing protein (SLBP-interacting protein 1) (hSLIP1)                                                                       |
| B1AK53 | ESPN DFNB36 LP2654  | Espin (Autosomal recessive deafness type 36 protein) (Ectoplasmic specialization protein)                                                   |
| B1ANS9 | WDR64               | WD repeat-containing protein 64                                                                                                             |
| B2RU33 | POTEC A26B2 POTE18  | POTE ankyrin domain family member C (ANKRD26-like family B member 2) (Prostate, ovary, testis-expressed protein on chromosome 18) (POTE-18) |
| B2RXH2 | KDM4E KDM4DL        | Lysine-specific demethylase 4E (EC 1.14.11.-) (KDM4D-like protein) (Lysine-specific demethylase 4D-like)                                    |
| B4DU55 | ZNF879              | Zinc finger protein 879                                                                                                                     |
| B4DXR9 | ZNF732              | Zinc finger protein 732                                                                                                                     |
| B4E2M5 | ANKRD66             | Ankyrin repeat domain-containing protein 66                                                                                                 |
| B5ME19 | EIF3CL              | Eukaryotic translation initiation factor 3 subunit C-like protein                                                                           |
| B7Z6K7 | ZNF814              | Putative uncharacterized zinc finger protein 814 (Putative zinc finger protein LOC730051)                                                   |
| B9A064 | IGLL5               | Immunoglobulin lambda-like polypeptide 5 (G lambda-1) (Germline immunoglobulin lambda 1)                                                    |
| C9JN71 | ZNF878              | Zinc finger protein 878                                                                                                                     |
| E5RG02 | PRSS46              | Putative serine protease 46 (EC 3.4.21.-)                                                                                                   |
| E5RJM6 | ANKRD65             | Ankyrin repeat domain-containing protein 65                                                                                                 |
| E7EML9 | PRSS44 TESSP4       | Serine protease 44 (EC 3.4.21.-) (Testis serine protease 4) (TESSP-4)                                                                       |
| H3BUK9 | POTEB2              | POTE ankyrin domain family member B2                                                                                                        |
| O00141 | SGK1 SGK            | Serine/threonine-protein kinase Sgk1 (EC 2.7.11.1) (Serum/glucocorticoid-regulated kinase 1)                                                |
| O00148 | DDX39A DDX39        | ATP-dependent RNA helicase DDX39A (EC 3.6.4.13) (DEAD box protein 39) (Nuclear RNA helicase URH49)                                          |
| O00178 | GTPBP1              | GTP-binding protein 1 (G-protein 1) (GP-1) (GP1)                                                                                            |

|        |                          |                                                                                                                                                                                                                                                                             |
|--------|--------------------------|-----------------------------------------------------------------------------------------------------------------------------------------------------------------------------------------------------------------------------------------------------------------------------|
| O00187 | MASP2                    | Mannan-binding lectin serine protease 2 (EC 3.4.21.104) (MBL-associated serine protease 2) (Mannose-binding protein-associated serine protease 2) (MASP-2) [Cleaved into: Mannan-binding lectin serine protease 2 A chain; Mannan-binding lectin serine protease 2 B chain] |
| O00206 | TLR4                     | Toll-like receptor 4 (hToll) (CD antigen CD284)                                                                                                                                                                                                                             |
| O00241 | SIRPB1                   | Signal-regulatory protein beta-1 (SIRP-beta-1) (CD172 antigen-like family member B) (CD antigen CD172b)                                                                                                                                                                     |
| O00267 | SUPT5H SPT5 SPT5H        | Transcription elongation factor SPT5 (hSPT5) (DRB sensitivity-inducing factor 160 kDa subunit) (DSIF p160) (DRB sensitivity-inducing factor large subunit) (DSIF large subunit) (Tat-cotransactivator 1 protein) (Tat-CT1 protein)                                          |
| O00370 |                          | LINE-1 retrotransposable element ORF2 protein (ORF2p) [Includes: Reverse transcriptase (EC 2.7.7.49); Endonuclease (EC 3.1.21.-)]                                                                                                                                           |
| O00411 | POLRMT                   | DNA-directed RNA polymerase, mitochondrial (MtRPOL) (EC 2.7.7.6)                                                                                                                                                                                                            |
| O00423 | EML1 EMAP1 EMAPL EMAPL1  | Echinoderm microtubule-associated protein-like 1 (EMAP-1) (HuEMAP-1)                                                                                                                                                                                                        |
| O00425 | IGF2BP3 IMP3 KOC1 VICKZ3 | Insulin-like growth factor 2 mRNA-binding protein 3 (IGF2 mRNA-binding protein 3) (IMP-3) (IGF-II mRNA-binding protein 3) (KH domain-containing protein overexpressed in cancer) (hKOC) (VICKZ family member 3)                                                             |
| O00442 | RTCA RPC RPC1 RTC1 RTCD1 | RNA 3'-terminal phosphate cyclase (RNA cyclase) (RNA-3'-phosphate cyclase) (EC 6.5.1.4) (RNA terminal phosphate cyclase domain-containing protein 1) (RTC domain-containing protein 1)                                                                                      |
| O00444 | PLK4 SAK STK18           | Serine/threonine-protein kinase PLK4 (EC 2.7.11.21) (Polo-like kinase 4) (PLK-4) (Serine/threonine-protein kinase 18) (Serine/threonine-protein kinase Sak)                                                                                                                 |
| O00472 | ELL2                     | RNA polymerase II elongation factor ELL2                                                                                                                                                                                                                                    |
| O00506 | STK25 SOK1 YSK1          | Serine/threonine-protein kinase 25 (EC 2.7.11.1) (Ste20-like kinase) (Sterile 20/oxidant stress-response kinase 1) (SOK-1) (Ste20/oxidant stress response kinase 1)                                                                                                         |
| O00566 | MPHOSPH10 MPP10          | U3 small nucleolar ribonucleoprotein protein MPP10 (M phase phosphoprotein 10)                                                                                                                                                                                              |
| O00567 | NOP56 NOL5A              | Nucleolar protein 56 (Nucleolar protein 5A)                                                                                                                                                                                                                                 |
| O00571 | DDX3X DBX DDX3           | ATP-dependent RNA helicase DDX3X (EC 3.6.4.13) (DEAD box protein 3, X-chromosomal) (DEAD box, X isoform) (Helicase-like protein 2) (HLP2)                                                                                                                                   |
| O00628 | PEX7 PTS2R               | Peroxisomal targeting signal 2 receptor (PTS2 receptor) (Peroxin-7)                                                                                                                                                                                                         |
| O14498 | ISLR UNQ189/PRO215       | Immunoglobulin superfamily containing leucine-rich repeat protein                                                                                                                                                                                                           |

|        |                                    |                                                                                                                                                                                                                                                                                                         |
|--------|------------------------------------|---------------------------------------------------------------------------------------------------------------------------------------------------------------------------------------------------------------------------------------------------------------------------------------------------------|
| O14576 | DYNC1H1 DNC11 DNCIC1               | Cytoplasmic dynein 1 intermediate chain 1 (Cytoplasmic dynein intermediate chain 1) (Dynein intermediate chain 1, cytosolic) (DH IC-1)                                                                                                                                                                  |
| O14578 | CIT CRIK KIAA0949 STK21            | Citron Rho-interacting kinase (CRIK) (EC 2.7.11.1) (Serine/threonine-protein kinase 21)                                                                                                                                                                                                                 |
| O14607 | UTY KDM6C                          | Histone demethylase UTY (EC 1.14.11.-) (Ubiquitously-transcribed TPR protein on the Y chromosome) (Ubiquitously-transcribed Y chromosome tetratricopeptide repeat protein)                                                                                                                              |
| O14610 | GNGT2 GNG8 GNG9 GNGT8              | Guanine nucleotide-binding protein G(I)/G(S)/G(O) subunit gamma-T2 (G gamma-C) (G-gamma-8) (G-gamma-9) (Guanine nucleotide binding protein gamma transducing activity polypeptide 2)                                                                                                                    |
| O14709 | ZNF197 ZKSCAN9 ZNF166              | Zinc finger protein 197 (Zinc finger protein with KRAB and SCAN domains 9) (ZnF20) (pVHL-associated KRAB domain-containing protein)                                                                                                                                                                     |
| O14727 | APAF1 KIAA0413                     | Apoptotic protease-activating factor 1 (APAF-1)                                                                                                                                                                                                                                                         |
| O14730 | RIOK3 SUDD                         | Serine/threonine-protein kinase RIO3 (EC 2.7.11.1) (RIO kinase 3) (sudd homolog)                                                                                                                                                                                                                        |
| O14733 | MAP2K7 JNKK2 MEK7 MKK7 PRKMK7 SKK4 | Dual specificity mitogen-activated protein kinase kinase 7 (MAP kinase kinase 7) (MAPKK 7) (EC 2.7.12.2) (JNK-activating kinase 2) (MAPK/ERK kinase 7) (MEK 7) (Stress-activated protein kinase kinase 4) (SAPK kinase 4) (SAPKK-4) (SAPKK4) (c-Jun N-terminal kinase kinase 2) (JNK kinase 2) (JNKK 2) |
| O14746 | TERT EST2 TCS1 TRT                 | Telomerase reverse transcriptase (EC 2.7.7.49) (HEST2) (Telomerase catalytic subunit) (Telomerase-associated protein 2) (TP2)                                                                                                                                                                           |
| O14757 | CHEK1 CHK1                         | Serine/threonine-protein kinase Chk1 (EC 2.7.11.1) (CHK1 checkpoint homolog) (Cell cycle checkpoint kinase) (Checkpoint kinase-1)                                                                                                                                                                       |
| O14775 | GNB5                               | Guanine nucleotide-binding protein subunit beta-5 (Gbeta5) (Transducin beta chain 5)                                                                                                                                                                                                                    |
| O14802 | POLR3A                             | DNA-directed RNA polymerase III subunit RPC1 (RNA polymerase III subunit C1) (EC 2.7.7.6) (DNA-directed RNA polymerase III largest subunit) (DNA-directed RNA polymerase III subunit A) (RNA polymerase III 155 kDa subunit) (RPC155) (RNA polymerase III subunit C160)                                 |
| O14896 | IRF6                               | Interferon regulatory factor 6 (IRF-6)                                                                                                                                                                                                                                                                  |
| O14920 | IKBKB IKKB                         | Inhibitor of nuclear factor kappa-B kinase subunit beta (I-kappa-B-kinase beta) (IKK-B) (IKK-beta) (IkbKB) (EC 2.7.11.10) (I-kappa-B kinase 2) (IKK2) (Nuclear factor NF-kappa-B inhibitor kinase beta) (NFKBIB)                                                                                        |
| O14936 | CASK LIN2                          | Peripheral plasma membrane protein                                                                                                                                                                                                                                                                      |

|        |                                                        |                                                                                                                                                                                                                                                                                                                         |
|--------|--------------------------------------------------------|-------------------------------------------------------------------------------------------------------------------------------------------------------------------------------------------------------------------------------------------------------------------------------------------------------------------------|
|        |                                                        | CASK (hCASK) (EC 2.7.11.1) (Calcium/calmodulin-dependent serine protein kinase) (Protein lin-2 homolog)                                                                                                                                                                                                                 |
| O14965 | AURKA AIK AIRK1 ARK1 AURA<br>AYK1 BTAK IAK1 STK15 STK6 | Aurora kinase A (EC 2.7.11.1) (Aurora 2) (Aurora/IPL1-related kinase 1) (ARK-1) (Aurora-related kinase 1) (hARK1) (Breast tumor-amplified kinase) (Serine/threonine-protein kinase 15) (Serine/threonine-protein kinase 6) (Serine/threonine-protein kinase aurora-A)                                                   |
| O14974 | PPP1R12A MBS MYPT1                                     | Protein phosphatase 1 regulatory subunit 12A (Myosin phosphatase-targeting subunit 1) (Myosin phosphatase target subunit 1) (Protein phosphatase myosin-binding subunit)                                                                                                                                                |
| O14979 | HNRNPDL HNRPD L JKTBP                                  | Heterogeneous nuclear ribonucleoprotein D-like (hnRNP D-like) (hnRNP DL) (AU-rich element RNA-binding factor) (JKT41-binding protein) (Protein laAUF1)                                                                                                                                                                  |
| O14980 | XPO1 CRM1                                              | Exportin-1 (Exp1) (Chromosome region maintenance 1 protein homolog)                                                                                                                                                                                                                                                     |
| O15015 | ZNF646 KIAA0296                                        | Zinc finger protein 646                                                                                                                                                                                                                                                                                                 |
| O15021 | MAST4 KIAA0303                                         | Microtubule-associated serine/threonine-protein kinase 4 (EC 2.7.11.1)                                                                                                                                                                                                                                                  |
| O15042 | U2SURP KIAA0332 SR140                                  | U2 snRNP-associated SURP motif-containing protein (140 kDa Ser/Arg-rich domain protein) (U2-associated protein SR140)                                                                                                                                                                                                   |
| O15054 | KDM6B JMJD3 KIAA0346                                   | Lysine-specific demethylase 6B (EC 1.14.11.-) (JmjC domain-containing protein 3) (Jumonji domain-containing protein 3) (Lysine demethylase 6B)                                                                                                                                                                          |
| O15075 | DCLK1 DCAMKL1 DCDC3A<br>KIAA0369                       | Serine/threonine-protein kinase DCLK1 (EC 2.7.11.1) (Doublecortin domain-containing protein 3A) (Doublecortin-like and CAM kinase-like 1) (Doublecortin-like kinase 1)                                                                                                                                                  |
| O15084 | ANKRD28 KIAA0379                                       | Serine/threonine-protein phosphatase 6 regulatory ankyrin repeat subunit A (PP6-ARS-A) (Serine/threonine-protein phosphatase 6 regulatory subunit ARS-A) (Ankyrin repeat domain-containing protein 28) (Phosphatase interactor targeting protein hnRNP K) (PITK)                                                        |
| O15111 | CHUK IKKA TCF16                                        | Inhibitor of nuclear factor kappa-B kinase subunit alpha (I-kappa-B kinase alpha) (IKK-A) (IKK-alpha) (IkBKA) (IkappaB kinase) (EC 2.7.11.10) (Conserved helix-loop-helix ubiquitous kinase) (I-kappa-B kinase 1) (IKK1) (Nuclear factor NF-kappa-B inhibitor kinase alpha) (NFKBIA) (Transcription factor 16) (TCF-16) |
| O15116 | LSM1 CASM                                              | U6 snRNA-associated Sm-like protein LSm1 (Cancer-associated Sm-like) (Small nuclear ribonuclear CaSm)                                                                                                                                                                                                                   |
| O15160 | POLR1C POLR1E                                          | DNA-directed RNA polymerases I and III subunit RPAC1 (DNA-directed RNA polymerase I subunit C) (RNA polymerases                                                                                                                                                                                                         |

|        |                           |                                                                                                                                                                                                        |
|--------|---------------------------|--------------------------------------------------------------------------------------------------------------------------------------------------------------------------------------------------------|
|        |                           | I and III subunit AC1) (AC40) (DNA-directed RNA polymerases I and III 40 kDa polypeptide) (RPA40) (RPA39) (RPC40)                                                                                      |
| O15205 | UBD FAT10                 | Ubiquitin D (Diubiquitin) (Ubiquitin-like protein FAT10)                                                                                                                                               |
| O15213 | WDR46 BING4 C6orf11 FP221 | WD repeat-containing protein 46 (WD repeat-containing protein BING4)                                                                                                                                   |
| O15226 | NKRF ITBA4 NRF            | NF-kappa-B-repressing factor (NFkB-repressing factor) (Protein ITBA4) (Transcription factor NRF)                                                                                                       |
| O15234 | CASC3 MLN51               | Protein CASC3 (Cancer susceptibility candidate gene 3 protein) (Metastatic lymph node gene 51 protein) (MLN 51) (Protein barentsz) (Btz)                                                               |
| O15264 | MAPK13 PRKM13 SAPK4       | Mitogen-activated protein kinase 13 (MAP kinase 13) (MAPK 13) (EC 2.7.11.24) (Mitogen-activated protein kinase p38 delta) (MAP kinase p38 delta) (Stress-activated protein kinase 4)                   |
| O15335 | CHAD SLRR4A               | Chondroadherin (Cartilage leucine-rich protein)                                                                                                                                                        |
| O15371 | EIF3D EIF3S7              | Eukaryotic translation initiation factor 3 subunit D (eIF3d) (Eukaryotic translation initiation factor 3 subunit 7) (eIF-3-zeta) (eIF3 p66)                                                            |
| O15391 | YY2 ZNF631                | Transcription factor YY2 (Yin and yang 2) (YY-2) (Zinc finger protein 631)                                                                                                                             |
| O15393 | TMPRSS2 PRSS10            | Transmembrane protease serine 2 (EC 3.4.21.-) (Serine protease 10) [Cleaved into: Transmembrane protease serine 2 non-catalytic chain; Transmembrane protease serine 2 catalytic chain]                |
| O15438 | ABCC3 CMOAT2 MLP2 MRP3    | Canalicular multispecific organic anion transporter 2 (ATP-binding cassette sub-family C member 3) (Multi-specific organic anion transporter D) (MOAT-D) (Multidrug resistance-associated protein 3)   |
| O15439 | ABCC4 MRP4                | Multidrug resistance-associated protein 4 (ATP-binding cassette sub-family C member 4) (MRP/cMOAT-related ABC transporter) (Multi-specific organic anion transporter B) (MOAT-B)                       |
| O15440 | ABCC5 MRP5                | Multidrug resistance-associated protein 5 (ATP-binding cassette sub-family C member 5) (Multi-specific organic anion transporter C) (MOAT-C) (SMRP) (pABC11)                                           |
| O15446 | CD3EAP ASE1 CAST PAF49    | DNA-directed RNA polymerase I subunit RPA34 (A34.5) (Antisense to ERCC-1 protein) (ASE-1) (CD3-epsilon-associated protein) (CAST) (CD3E-associated protein) (RNA polymerase I-associated factor PAF49) |
| O15455 | TLR3                      | Toll-like receptor 3 (CD antigen CD283)                                                                                                                                                                |
| O15457 | MSH4                      | MutS protein homolog 4 (hMSH4)                                                                                                                                                                         |
| O15514 | POLR2D                    | DNA-directed RNA polymerase II subunit RPB4 (RNA polymerase II subunit B4) (DNA-directed RNA polymerase II subunit D) (RNA polymerase II 16 kDa subunit)                                               |

|        |                              |                                                                                                                                                                                                                  |
|--------|------------------------------|------------------------------------------------------------------------------------------------------------------------------------------------------------------------------------------------------------------|
|        |                              | (RPB16)                                                                                                                                                                                                          |
| O15523 | DDX3Y DBY                    | ATP-dependent RNA helicase DDX3Y (EC 3.6.4.13) (DEAD box protein 3, Y-chromosomal)                                                                                                                               |
| O15530 | PDPK1 PDK1                   | 3-phosphoinositide-dependent protein kinase 1 (hPDK1) (EC 2.7.11.1)                                                                                                                                              |
| O15550 | KDM6A UTX                    | Lysine-specific demethylase 6A (EC 1.14.11.-) (Histone demethylase UTX) (Ubiquitously-transcribed TPR protein on the X chromosome) (Ubiquitously-transcribed X chromosome tetratricopeptide repeat protein)      |
| O43143 | DHX15 DBP1 DDX15             | Pre-mRNA-splicing factor ATP-dependent RNA helicase DHX15 (EC 3.6.4.13) (ATP-dependent RNA helicase #46) (DEAH box protein 15)                                                                                   |
| O43148 | RNMT KIAA0398                | mRNA cap guanine-N7 methyltransferase (EC 2.1.1.56) (RG7MT1) (mRNA (guanine-N(7)-)-methyltransferase) (mRNA cap methyltransferase) (hCMT1) (hMet) (hcm1p)                                                        |
| O43155 | FLRT2 KIAA0405 UNQ232/PRO265 | Leucine-rich repeat transmembrane protein FLRT2 (Fibronectin-like domain-containing leucine-rich transmembrane protein 2)                                                                                        |
| O43167 | ZBTB24 KIAA0441 ZNF450       | Zinc finger and BTB domain-containing protein 24 (Zinc finger protein 450)                                                                                                                                       |
| O43172 | PRPF4 PRP4                   | U4/U6 small nuclear ribonucleoprotein Prp4 (PRP4 homolog) (hPrp4) (U4/U6 snRNP 60 kDa protein) (WD splicing factor Prp4)                                                                                         |
| O43240 | KLK10 NES1 PRSSL1            | Kallikrein-10 (EC 3.4.21.-) (Normal epithelial cell-specific 1) (Protease serine-like 1)                                                                                                                         |
| O43251 | RBFOX2 FOX2 HRNBP2 RBM9 RTA  | RNA binding protein fox-1 homolog 2 (Fox-1 homolog B) (Hexaribonucleotide-binding protein 2) (RNA-binding motif protein 9) (RNA-binding protein 9) (Repressor of tamoxifen transcriptional activity)             |
| O43283 | MAP3K13 LZK                  | Mitogen-activated protein kinase kinase kinase 13 (EC 2.7.11.25) (Leucine zipper-bearing kinase) (Mixed lineage kinase) (MLK)                                                                                    |
| O43290 | SART1                        | U4/U6.U5 tri-snRNP-associated protein 1 (SNU66 homolog) (hSnu66) (Squamous cell carcinoma antigen recognized by T-cells 1) (SART-1) (hSART-1) (U4/U6.U5 tri-snRNP-associated 110 kDa protein) (allergen Hom s 1) |
| O43293 | DAPK3 ZIPK                   | Death-associated protein kinase 3 (DAP kinase 3) (EC 2.7.11.1) (DAP-like kinase) (Dlk) (MYPT1 kinase) (Zipper-interacting protein kinase) (ZIP-kinase)                                                           |
| O43296 | ZNF264 KIAA0412              | Zinc finger protein 264                                                                                                                                                                                          |
| O43300 | LRRTM2 KIAA0416 LRRN2        | Leucine-rich repeat transmembrane neuronal protein 2 (Leucine-rich repeat neuronal 2 protein)                                                                                                                    |



|        |                            |                                                                                                                                                                                                                                                                           |
|--------|----------------------------|---------------------------------------------------------------------------------------------------------------------------------------------------------------------------------------------------------------------------------------------------------------------------|
| O43310 | CTIF KIAA0427              | CBP80/20-dependent translation initiation factor                                                                                                                                                                                                                          |
| O43318 | MAP3K7 TAK1                | Mitogen-activated protein kinase kinase 7 (EC 2.7.11.25) (Transforming growth factor-beta-activated kinase 1) (TGF-beta-activated kinase 1)                                                                                                                               |
| O43345 | ZNF208 ZNF91L              | Zinc finger protein 208 (Zinc finger protein 91-like)                                                                                                                                                                                                                     |
| O43347 | MSI1                       | RNA-binding protein Musashi homolog 1 (Musashi-1)                                                                                                                                                                                                                         |
| O43361 | ZNF749                     | Zinc finger protein 749                                                                                                                                                                                                                                                   |
| O43379 | WDR62 C19orf14             | WD repeat-containing protein 62                                                                                                                                                                                                                                           |
| O43390 | HNRNPR HNRPR               | Heterogeneous nuclear ribonucleoprotein R (hnRNP R)                                                                                                                                                                                                                       |
| O43395 | PRPF3 HPRP3 PRP3           | U4/U6 small nuclear ribonucleoprotein Prp3 (Pre-mRNA-splicing factor 3) (hPrp3) (U4/U6 snRNP 90 kDa protein)                                                                                                                                                              |
| O43414 | ERI3 PINT1 PRNPIP PRNPIP1  | ERI1 exoribonuclease 3 (EC 3.1.-.-) (Prion interactor 1) (Prion protein-interacting protein)                                                                                                                                                                              |
| O43432 | EIF4G3                     | Eukaryotic translation initiation factor 4 gamma 3 (eIF-4-gamma 3) (eIF-4G 3) (eIF4G 3) (eIF-4-gamma II) (eIF4GII)                                                                                                                                                        |
| O43567 | RNF13 RZF                  | E3 ubiquitin-protein ligase RNF13 (EC 6.3.2.-) (RING finger protein 13)                                                                                                                                                                                                   |
| O43592 | XPOT                       | Exportin-T (Exportin(tRNA)) (tRNA exportin)                                                                                                                                                                                                                               |
| O43623 | SNAI2 SLUG SLUGH           | Zinc finger protein SNAI2 (Neural crest transcription factor Slug) (Protein snail homolog 2)                                                                                                                                                                              |
| O43660 | PLRG1                      | Pleiotropic regulator 1                                                                                                                                                                                                                                                   |
| O43684 | BUB3                       | Mitotic checkpoint protein BUB3                                                                                                                                                                                                                                           |
| O43719 | HTATSF1                    | HIV Tat-specific factor 1 (Tat-SF1)                                                                                                                                                                                                                                       |
| O43776 | NARS                       | Asparagine--tRNA ligase, cytoplasmic (EC 6.1.1.22) (Asparaginyl-tRNA synthetase) (AsnRS)                                                                                                                                                                                  |
| O43781 | DYRK3                      | Dual specificity tyrosine-phosphorylation-regulated kinase 3 (EC 2.7.12.1) (Regulatory erythroid kinase) (REDK)                                                                                                                                                           |
| O43809 | NUDT21 CFIM25 CPSF25 CPSF5 | Cleavage and polyadenylation specificity factor subunit 5 (Cleavage and polyadenylation specificity factor 25 kDa subunit) (CFIm25) (CPSF 25 kDa subunit) (Nucleoside diphosphate-linked moiety X motif 21) (Nudix motif 21) (Pre-mRNA cleavage factor Im 25 kDa subunit) |
| O43815 | STRN                       | Striatin                                                                                                                                                                                                                                                                  |
| O43818 | RRP9 RNU3IP2 U355K         | U3 small nucleolar RNA-interacting protein 2 (RRP9 homolog) (U3 small nucleolar ribonucleoprotein-associated 55 kDa protein) (U3 snoRNP-associated 55 kDa protein) (U3-55K)                                                                                               |
| O43829 | ZBTB14 ZFP161 ZNF478       | Zinc finger and BTB domain-containing protein 14 (Zinc finger protein 161 homolog) (Zfp-161) (Zinc finger protein 478) (Zinc finger protein 5 homolog) (ZF5) (Zfp-5) (hZF5)                                                                                               |

|        |                                       |                                                                                                                                                                                                                                                 |
|--------|---------------------------------------|-------------------------------------------------------------------------------------------------------------------------------------------------------------------------------------------------------------------------------------------------|
| O43930 | PRKY                                  | Putative serine/threonine-protein kinase PRKY (EC 2.7.11.1)                                                                                                                                                                                     |
| O60229 | KALRN DUET DUO HAPIP TRAD             | Kalirin (EC 2.7.11.1) (Huntingtin-associated protein-interacting protein) (Protein Duo) (Serine/threonine-protein kinase with Dbl- and pleckstrin homology domain)                                                                              |
| O60231 | DHX16 DBP2 DDX16 KIAA0577             | Putative pre-mRNA-splicing factor ATP-dependent RNA helicase DHX16 (EC 3.6.4.13) (ATP-dependent RNA helicase #3) (DEAH-box protein 16)                                                                                                          |
| O60235 | TMPRSS11D HAT                         | Transmembrane protease serine 11D (EC 3.4.21.-) (Airway trypsin-like protease) [Cleaved into: Transmembrane protease serine 11D non-catalytic chain; Transmembrane protease serine 11D catalytic chain]                                         |
| O60237 | PPP1R12B MYPT2                        | Protein phosphatase 1 regulatory subunit 12B (Myosin phosphatase-targeting subunit 2) (Myosin phosphatase target subunit 2)                                                                                                                     |
| O60259 | KLK8 NRPN PRSS19 TADG14 UNQ283/PRO322 | Kallikrein-8 (hK8) (EC 3.4.21.118) (Neuropsin) (NP) (Ovasin) (Serine protease 19) (Serine protease TADG-14) (Tumor-associated differentially expressed gene 14 protein)                                                                         |
| O60262 | GNG7 GNGT7                            | Guanine nucleotide-binding protein G(I)/G(S)/G(O) subunit gamma-7                                                                                                                                                                               |
| O60285 | NUAK1 ARK5 KIAA0537 OMPHK1            | NUAK family SNF1-like kinase 1 (EC 2.7.11.1) (AMPK-related protein kinase 5) (ARK5) (Omphalocele kinase 1)                                                                                                                                      |
| O60287 | URB1 C21orf108 KIAA0539 NOP254 NPA1   | Nucleolar pre-ribosomal-associated protein 1 (Nucleolar protein 254 kDa) (URB1 ribosome biogenesis 1 homolog)                                                                                                                                   |
| O60304 | ZNF500 KIAA0557 ZKSCAN18              | Zinc finger protein 500 (Zinc finger protein with KRAB and SCAN domains 18)                                                                                                                                                                     |
| O60307 | MAST3 KIAA0561                        | Microtubule-associated serine/threonine-protein kinase 3 (EC 2.7.11.1)                                                                                                                                                                          |
| O60318 | MCM3AP GANP KIAA0572 MAP80            | Germinal-center associated nuclear protein (GANP) (80 kDa MCM3-associated protein) (MCM3 acetylating protein) (MCM3AP) (EC 2.3.1.-) (MCM3 acetyltransferase)                                                                                    |
| O60336 | MAPKBP1 JNKBP1 KIAA0596               | Mitogen-activated protein kinase-binding protein 1 (JNK-binding protein 1) (JNKBP-1)                                                                                                                                                            |
| O60346 | PHLPP1 KIAA0606 PHLPP PLEKHE1 SCOP    | PH domain leucine-rich repeat-containing protein phosphatase 1 (EC 3.1.3.16) (Pleckstrin homology domain-containing family E member 1) (PH domain-containing family E member 1) (Suprachiasmatic nucleus circadian oscillatory protein) (hSCOP) |
| O60381 | HBP1                                  | HMG box-containing protein 1 (HMG box transcription factor 1) (High mobility group box transcription factor 1)                                                                                                                                  |
| O60481 | ZIC3 ZNF203                           | Zinc finger protein ZIC 3 (Zinc finger protein 203) (Zinc finger protein of the cerebellum 3)                                                                                                                                                   |
| O60506 | SYNCRIP HNRPQ NSAP1                   | Heterogeneous nuclear ribonucleoprotein Q                                                                                                                                                                                                       |

|        |                         |                                                                                                                                                                                                                                                                                                      |
|--------|-------------------------|------------------------------------------------------------------------------------------------------------------------------------------------------------------------------------------------------------------------------------------------------------------------------------------------------|
|        |                         | (hnRNP Q) (Glycine- and tyrosine-rich RNA-binding protein) (GRY-RBP) (NS1-associated protein 1) (Synaptotagmin-binding, cytoplasmic RNA-interacting protein)                                                                                                                                         |
| O60508 | CDC40 EHB3 PRP17 PRPF17 | Pre-mRNA-processing factor 17 (Cell division cycle 40 homolog) (EH-binding protein 3) (Ehb3) (PRP17 homolog) (hPRP17)                                                                                                                                                                                |
| O60516 | EIF4EBP3                | Eukaryotic translation initiation factor 4E-binding protein 3 (4E-BP3) (eIF4E-binding protein 3)                                                                                                                                                                                                     |
| O60563 | CCNT1                   | Cyclin-T1 (CycT1) (Cyclin-T)                                                                                                                                                                                                                                                                         |
| O60573 | EIF4E2 EIF4EL3          | Eukaryotic translation initiation factor 4E type 2 (eIF-4E type 2) (eIF4E type 2) (Eukaryotic translation initiation factor 4E homologous protein) (Eukaryotic translation initiation factor 4E-like 3) (eIF4E-like protein 4E-LP) (mRNA cap-binding protein 4EHP) (mRNA cap-binding protein type 3) |
| O60583 | CCNT2                   | Cyclin-T2 (CycT2)                                                                                                                                                                                                                                                                                    |
| O60602 | TLR5 TIL3               | Toll-like receptor 5 (Toll/interleukin-1 receptor-like protein 3)                                                                                                                                                                                                                                    |
| O60603 | TLR2 TIL4               | Toll-like receptor 2 (Toll/interleukin-1 receptor-like protein 4) (CD antigen CD282)                                                                                                                                                                                                                 |
| O60706 | ABCC9 SUR2              | ATP-binding cassette sub-family C member 9 (Sulfonylurea receptor 2)                                                                                                                                                                                                                                 |
| O60733 | PLA2G6 PLPLA9           | 85/88 kDa calcium-independent phospholipase A2 (CaI-PLA2) (EC 3.1.1.4) (Group VI phospholipase A2) (GVI PLA2) (Intracellular membrane-associated calcium-independent phospholipase A2 beta) (iPLA2-beta) (Patatin-like phospholipase domain-containing protein 9) (PNPLA9)                           |
| O60765 | ZNF354A EZNF HKL1 TCF17 | Zinc finger protein 354A (Transcription factor 17) (TCF-17) (Zinc finger protein eZNF)                                                                                                                                                                                                               |
| O60783 | MRPS14                  | 28S ribosomal protein S14, mitochondrial (MRP-S14) (S14mt)                                                                                                                                                                                                                                           |
| O60812 | HNRNPCL1 HNRPCL1        | Heterogeneous nuclear ribonucleoprotein C-like 1 (hnRNP C-like-1) (hnRNP core protein C-like 1)                                                                                                                                                                                                      |
| O60832 | DKC1 NOLA4              | H/ACA ribonucleoprotein complex subunit 4 (EC 5.4.99.-) (CBF5 homolog) (Dyskerin) (Nopp140-associated protein of 57 kDa) (Nucleolar protein NAP57) (Nucleolar protein family A member 4) (snoRNP protein DKC1)                                                                                       |
| O60841 | EIF5B IF2 KIAA0741      | Eukaryotic translation initiation factor 5B (eIF-5B) (Translation initiation factor IF-2)                                                                                                                                                                                                            |
| O60907 | TBL1X TBL1              | F-box-like/WD repeat-containing protein TBL1X (SMAP55) (Transducin beta-like protein 1X) (Transducin-beta-like protein 1, X-linked)                                                                                                                                                                  |
| O60930 | RNASEH1 RNH1            | Ribonuclease H1 (RNase H1) (EC 3.1.26.4) (Ribonuclease H type II)                                                                                                                                                                                                                                    |

|        |                                           |                                                                                                                                                                                                                                                  |
|--------|-------------------------------------------|--------------------------------------------------------------------------------------------------------------------------------------------------------------------------------------------------------------------------------------------------|
| O60938 | KERA SLRR2B                               | Keratocan (KTN) (Keratan sulfate proteoglycan keratocan)                                                                                                                                                                                         |
| O60942 | RNGTT CAP1A                               | mRNA-capping enzyme (HCAP1) (HCE) [Includes: Polynucleotide 5'-triphosphatase (EC 3.1.3.33) (mRNA 5'-triphosphatase) (TPase); mRNA guanylyltransferase (EC 2.7.7.50) (GTP--RNA guanylyltransferase) (GTase)]                                     |
| O71037 | ERVK-19                                   | Endogenous retrovirus group K member 19 Env polyprotein (EnvK3 protein) (Envelope polyprotein) (HERV-K(C19) envelope protein) (HERV-K_19q11 provirus ancestral Env polyprotein) [Cleaved into: Surface protein (SU); Transmembrane protein (TM)] |
| O75037 | KIF21B KIAA0449                           | Kinesin-like protein KIF21B                                                                                                                                                                                                                      |
| O75054 | IGSF3 EWI3 KIAA0466                       | Immunoglobulin superfamily member 3 (IgSF3) (Glu-Trp-Ile EWI motif-containing protein 3) (EWI-3)                                                                                                                                                 |
| O75083 | WDR1                                      | WD repeat-containing protein 1 (Actin-interacting protein 1) (AIP1) (NORI-1)                                                                                                                                                                     |
| O75093 | SLIT1 KIAA0813 MEGF4 SLIL1                | Slit homolog 1 protein (Slit-1) (Multiple epidermal growth factor-like domains protein 4) (Multiple EGF-like domains protein 4)                                                                                                                  |
| O75094 | SLIT3 KIAA0814 MEGF5 SLIL2 UNQ691/PRO1336 | Slit homolog 3 protein (Slit-3) (Multiple epidermal growth factor-like domains protein 5) (Multiple EGF-like domains protein 5)                                                                                                                  |
| O75116 | ROCK2 KIAA0619                            | Rho-associated protein kinase 2 (EC 2.7.11.1) (Rho kinase 2) (Rho-associated, coiled-coil-containing protein kinase 2) (Rho-associated, coiled-coil-containing protein kinase II) (ROCK-II) (p164 ROCK-2)                                        |
| O75123 | ZNF623 KIAA0628                           | Zinc finger protein 623                                                                                                                                                                                                                          |
| O75127 | PTCD1 KIAA0632                            | Pentatricopeptide repeat-containing protein 1, mitochondrial                                                                                                                                                                                     |
| O75151 | PHF2 CENP-35 KIAA0662                     | Lysine-specific demethylase PHF2 (EC 1.14.11.-) (GRC5) (PHD finger protein 2)                                                                                                                                                                    |
| O75153 | CLUH KIAA0664                             | Clustered mitochondria protein homolog                                                                                                                                                                                                           |
| O75164 | KDM4A JHDM3A JMJD2 JMJD2A KIAA0677        | Lysine-specific demethylase 4A (EC 1.14.11.-) (JmjC domain-containing histone demethylation protein 3A) (Jumonji domain-containing protein 2A)                                                                                                   |
| O75179 | ANKRD17 GTAR KIAA0697                     | Ankyrin repeat domain-containing protein 17 (Gene trap ankyrin repeat protein) (Serologically defined breast cancer antigen NY-BR-16)                                                                                                            |
| O75290 | ZNF780A                                   | Zinc finger protein 780A                                                                                                                                                                                                                         |
| O75312 | ZPR1 ZNF259                               | Zinc finger protein ZPR1 (Zinc finger protein 259)                                                                                                                                                                                               |
| O75325 | LRRN2 GAC1 LRRN5 UNQ256/PRO293            | Leucine-rich repeat neuronal protein 2 (Glioma amplified on chromosome 1 protein) (Leucine-rich repeat neuronal protein 5)                                                                                                                       |
| O75346 | ZNF253 BMZF1 ZNF411                       | Zinc finger protein 253 (Bone marrow zinc finger 1) (BMZF-1) (Zinc finger protein                                                                                                                                                                |

|        |                                   |                                                                                                                                                                                                                                                                                                                                                                        |
|--------|-----------------------------------|------------------------------------------------------------------------------------------------------------------------------------------------------------------------------------------------------------------------------------------------------------------------------------------------------------------------------------------------------------------------|
|        |                                   | 411)                                                                                                                                                                                                                                                                                                                                                                   |
| O75373 | ZNF737 ZNF102                     | Zinc finger protein 737 (Zinc finger protein 102)                                                                                                                                                                                                                                                                                                                      |
| O75385 | ULK1 KIAA0722                     | Serine/threonine-protein kinase ULK1 (EC 2.7.11.1) (Autophagy-related protein 1 homolog) (ATG1) (hATG1) (Unc-51-like kinase 1)                                                                                                                                                                                                                                         |
| O75394 | MRPL33 C2orf1                     | 39S ribosomal protein L33, mitochondrial (L33mt) (MRP-L33)                                                                                                                                                                                                                                                                                                             |
| O75417 | POLQ POLH                         | DNA polymerase theta (EC 2.7.7.7) (DNA polymerase eta)                                                                                                                                                                                                                                                                                                                 |
| O75437 | ZNF254 BMZF5 ZNF539 ZNF91L        | Zinc finger protein 254 (Bone marrow zinc finger 5) (BMZF-5) (Hematopoietic cell-derived zinc finger protein 1) (HD-ZNF1) (Zinc finger protein 539) (Zinc finger protein 91-like)                                                                                                                                                                                      |
| O75460 | ERN1 IRE1                         | Serine/threonine-protein kinase/endoribonuclease IRE1 (Endoplasmic reticulum-to-nucleus signaling 1) (Inositol-requiring protein 1) (hIRE1p) (Ire1-alpha) (IRE1a) [Includes: Serine/threonine-protein kinase (EC 2.7.11.1); Endoribonuclease (EC 3.1.26.-)]                                                                                                            |
| O75467 | ZNF324 ZNF324A                    | Zinc finger protein 324A (Zinc finger protein ZF5128)                                                                                                                                                                                                                                                                                                                  |
| O75473 | LGR5 GPR49 GPR67                  | Leucine-rich repeat-containing G-protein coupled receptor 5 (G-protein coupled receptor 49) (G-protein coupled receptor 67) (G-protein coupled receptor HG38)                                                                                                                                                                                                          |
| O75494 | SRSF10 FUSIP1 FUSIP2 SFRS13A TASR | Serine/arginine-rich splicing factor 10 (40 kDa SR-repressor protein) (SRrp40) (FUS-interacting serine-arginine-rich protein 1) (Splicing factor SRp38) (Splicing factor, arginine/serine-rich 13A) (TLS-associated protein with Ser-Arg repeats) (TASR) (TLS-associated protein with SR repeats) (TLS-associated serine-arginine protein) (TLS-associated SR protein) |
| O75525 | KHDRBS3 SALP SLM2                 | KH domain-containing, RNA-binding, signal transduction-associated protein 3 (RNA-binding protein T-Star) (Sam68-like mammalian protein 2) (SLM-2) (Sam68-like phosphotyrosine protein)                                                                                                                                                                                 |
| O75526 | RBMXL2 HNRNPGT                    | RNA-binding motif protein, X-linked-like-2 (Testis-specific heterogeneous nuclear ribonucleoprotein G-T) (hnRNP G-T)                                                                                                                                                                                                                                                   |
| O75529 | TAF5L PAF65B                      | TAF5-like RNA polymerase II p300/CBP-associated factor-associated factor 65 kDa subunit 5L (PCAF-associated factor 65 beta) (PAF65-beta)                                                                                                                                                                                                                               |
| O75530 | EED                               | Polycomb protein EED (hEED) (WD protein associating with integrin cytoplasmic tails 1) (WAIT-1)                                                                                                                                                                                                                                                                        |
| O75533 | SF3B1 SAP155                      | Splicing factor 3B subunit 1 (Pre-mRNA-splicing factor SF3b 155 kDa subunit) (SF3b155) (Spliceosome-associated protein 155) (SAP 155)                                                                                                                                                                                                                                  |
| O75534 | CSDE1 D1S155E KIAA0885 NRU UNR    | Cold shock domain-containing protein E1 (N-ras upstream gene protein) (Protein                                                                                                                                                                                                                                                                                         |

|        |                                  |                                                                                                                                                                                                                                                                                  |
|--------|----------------------------------|----------------------------------------------------------------------------------------------------------------------------------------------------------------------------------------------------------------------------------------------------------------------------------|
|        |                                  | UNR)                                                                                                                                                                                                                                                                             |
| O75554 | WBP4 FBP21 FBNP21                | WW domain-binding protein 4 (WBP-4) (Formin-binding protein 21) (WW domain-containing-binding protein 4)                                                                                                                                                                         |
| O75569 | PRKRA PACT RAX HSD-14 HSD14      | Interferon-inducible double-stranded RNA-dependent protein kinase activator A (PKR-associated protein X) (PKR-associating protein X) (Protein activator of the interferon-induced protein kinase) (Protein kinase, interferon-inducible double-stranded RNA-dependent activator) |
| O75570 | MTRF1                            | Peptide chain release factor 1, mitochondrial (MRF-1) (MtRF-1)                                                                                                                                                                                                                   |
| O75575 | CRCP                             | DNA-directed RNA polymerase III subunit RPC9 (RNA polymerase III subunit C9) (Calcitonin gene-related peptide-receptor component protein) (CGRP-RCP) (CGRP-receptor component protein) (CGRP-PCP) (HsC17)                                                                        |
| O75582 | RPS6KA5 MSK1                     | Ribosomal protein S6 kinase alpha-5 (S6K-alpha-5) (EC 2.7.11.1) (90 kDa ribosomal protein S6 kinase 5) (Nuclear mitogen- and stress-activated protein kinase 1) (RSK-like protein kinase) (RSKL)                                                                                 |
| O75616 | ERAL1 HERA                       | GTPase Era, mitochondrial (H-ERA) (hERA) (Conserved ERA-like GTPase) (CEGA) (ERA-W) (ERA-like protein 1)                                                                                                                                                                         |
| O75643 | SNRNP200 ASCC3L1 HELIC2 KIAA0788 | U5 small nuclear ribonucleoprotein 200 kDa helicase (EC 3.6.4.13) (Activating signal cointegrator 1 complex subunit 3-like 1) (BRR2 homolog) (U5 snRNP-specific 200 kDa protein) (U5-200KD)                                                                                      |
| O75648 | TRMU MTU1 TRMT1                  | Mitochondrial tRNA-specific 2-thiouridylase 1 (EC 2.8.1.-) (MTO2 homolog)                                                                                                                                                                                                        |
| O75676 | RPS6KA4 MSK2                     | Ribosomal protein S6 kinase alpha-4 (S6K-alpha-4) (EC 2.7.11.1) (90 kDa ribosomal protein S6 kinase 4) (Nuclear mitogen- and stress-activated protein kinase 2) (Ribosomal protein kinase B) (RSKB)                                                                              |
| O75683 | SURF6 SURF-6                     | Surfeit locus protein 6                                                                                                                                                                                                                                                          |
| O75691 | UTP20 DRIM                       | Small subunit processome component 20 homolog (Down-regulated in metastasis protein) (Novel nucleolar protein 73) (NNP73) (Protein Key-1A6)                                                                                                                                      |
| O75694 | NUP155 KIAA0791                  | Nuclear pore complex protein Nup155 (155 kDa nucleoporin) (Nucleoporin Nup155)                                                                                                                                                                                                   |
| O75717 | WDHD1 AND1                       | WD repeat and HMG-box DNA-binding protein 1 (Acidic nucleoplasmic DNA-binding protein 1) (And-1)                                                                                                                                                                                 |
| O75762 | TRPA1 ANKTM1                     | Transient receptor potential cation channel subfamily A member 1 (Ankyrin-like with transmembrane domains protein 1) (Transformation-sensitive protein p120)                                                                                                                     |
| O75792 | RNASEH2A RNASEHI RNHIA           | Ribonuclease H2 subunit A (RNase H2 subunit A) (EC 3.1.26.4) (Aicardi-Goutieres syndrome 4 protein) (AGS4) (RNase H(35)) (Ribonuclease HI large subunit) (RNase HI large subunit)                                                                                                |

|        |                             |                                                                                                                                                                                                                                                      |
|--------|-----------------------------|------------------------------------------------------------------------------------------------------------------------------------------------------------------------------------------------------------------------------------------------------|
|        |                             | (Ribonuclease HI subunit A)                                                                                                                                                                                                                          |
| O75818 | RPP40 RNASEP1               | Ribonuclease P protein subunit p40 (RNaseP protein p40) (EC 3.1.26.5) (RNase P subunit 1)                                                                                                                                                            |
| O75820 | ZNF189                      | Zinc finger protein 189                                                                                                                                                                                                                              |
| O75821 | EIF3G EIF3S4                | Eukaryotic translation initiation factor 3 subunit G (eIF3g) (Eukaryotic translation initiation factor 3 RNA-binding subunit) (eIF-3 RNA-binding subunit) (Eukaryotic translation initiation factor 3 subunit 4) (eIF-3-delta) (eIF3 p42) (eIF3 p44) |
| O75822 | EIF3J EIF3S1 PRO0391        | Eukaryotic translation initiation factor 3 subunit J (eIF3j) (Eukaryotic translation initiation factor 3 subunit 1) (eIF-3-alpha) (eIF3 p35)                                                                                                         |
| O75832 | PSMD10                      | 26S proteasome non-ATPase regulatory subunit 10 (26S proteasome regulatory subunit p28) (Gankyrin) (p28(GANK))                                                                                                                                       |
| O75879 | GATB PET112 PET112L HSPC199 | Glutamyl-tRNA(Gln) amidotransferase subunit B, mitochondrial (Glu-AdT subunit B) (EC 6.3.5.-) (Cytochrome c oxidase assembly factor PET112 homolog)                                                                                                  |
| O75891 | ALDH1L1 FTHFD               | Cytosolic 10-formyltetrahydrofolate dehydrogenase (10-FTHFDH) (FDH) (EC 1.5.1.6) (Aldehyde dehydrogenase family 1 member L1)                                                                                                                         |
| O75909 | CCNK CPR4                   | Cyclin-K                                                                                                                                                                                                                                             |
| O75914 | PAK3 OPHN3                  | Serine/threonine-protein kinase PAK 3 (EC 2.7.11.1) (Beta-PAK) (Oligophrenin-3) (p21-activated kinase 3) (PAK-3)                                                                                                                                     |
| O75940 | SMNDC1 SMNR SPF30           | Survival of motor neuron-related-splicing factor 30 (30 kDa splicing factor SMNrp) (SMN-related protein) (Survival motor neuron domain-containing protein 1)                                                                                         |
| O75951 | LYZL6 LYC1 UNQ754/PRO1485   | Lysozyme-like protein 6 (EC 3.2.1.17)                                                                                                                                                                                                                |
| O75962 | TRIO                        | Triple functional domain protein (EC 2.7.11.1) (PTPRF-interacting protein)                                                                                                                                                                           |
| O75971 | SNAPC5 SNAP19               | snRNA-activating protein complex subunit 5 (SNAPc subunit 5) (Small nuclear RNA-activating complex polypeptide 5) (snRNA-activating protein complex 19 kDa subunit) (SNAPc 19 kDa subunit)                                                           |
| O76039 | CDKL5 STK9                  | Cyclin-dependent kinase-like 5 (EC 2.7.11.22) (Serine/threonine-protein kinase 9)                                                                                                                                                                    |
| O76071 | CIAO1 WDR39                 | Probable cytosolic iron-sulfur protein assembly protein CIAO1 (WD repeat-containing protein 39)                                                                                                                                                      |
| O76094 | SRP72                       | Signal recognition particle subunit SRP72 (SRP72) (Signal recognition particle 72 kDa protein)                                                                                                                                                       |
| O77932 | DXO DOM3L DOM3Z NG6         | Decapping and exoribonuclease protein (DXO) (EC 3.1.13.-) (EC 3.6.1.-) (Dom-3 homolog Z)                                                                                                                                                             |
| O94761 | RECQL4 RECQ4                | ATP-dependent DNA helicase Q4 (EC 3.6.4.12) (DNA helicase, RecQ-like type 4) (RecQ4) (RTS) (RecQ protein-like 4)                                                                                                                                     |
| O94762 | RECQL5 RECQ5                | ATP-dependent DNA helicase Q5 (EC                                                                                                                                                                                                                    |

|        |                              |                                                                                                                                                                                |
|--------|------------------------------|--------------------------------------------------------------------------------------------------------------------------------------------------------------------------------|
|        |                              | 3.6.4.12) (DNA helicase, RecQ-like type 5) (RecQ5) (RecQ protein-like 5)                                                                                                       |
| O94768 | STK17B DRAK2                 | Serine/threonine-protein kinase 17B (EC 2.7.11.1) (DAP kinase-related apoptosis-inducing protein kinase 2)                                                                     |
| O94769 | ECM2                         | Extracellular matrix protein 2 (Matrix glycoprotein SC1/ECM2)                                                                                                                  |
| O94804 | STK10 LOK                    | Serine/threonine-protein kinase 10 (EC 2.7.11.1) (Lymphocyte-oriented kinase)                                                                                                  |
| O94806 | PRKD3 EPK2 PRKCN             | Serine/threonine-protein kinase D3 (EC 2.7.11.13) (Protein kinase C nu type) (Protein kinase EPK2) (nPKC-nu)                                                                   |
| O94813 | SLIT2 SLIL3                  | Slit homolog 2 protein (Slit-2) [Cleaved into: Slit homolog 2 protein N-product; Slit homolog 2 protein C-product]                                                             |
| O94892 | ZNF432 KIAA0798              | Zinc finger protein 432                                                                                                                                                        |
| O94898 | LRIG2 KIAA0806 LIG2          | Leucine-rich repeats and immunoglobulin-like domains protein 2 (LIG-2)                                                                                                         |
| O94901 | SUN1 KIAA0810 UNC84A         | SUN domain-containing protein 1 (Protein unc-84 homolog A) (Sad1/unc-84 protein-like 1)                                                                                        |
| O94906 | PRPF6 C20orf14               | Pre-mRNA-processing factor 6 (Androgen receptor N-terminal domain-transactivating protein 1) (ANT-1) (PRP6 homolog) (U5 snRNP-associated 102 kDa protein) (U5-102 kDa protein) |
| O94911 | ABCA8 KIAA0822               | ATP-binding cassette sub-family A member 8                                                                                                                                     |
| O94921 | CDK14 KIAA0834 PFTK1         | Cyclin-dependent kinase 14 (EC 2.7.11.22) (Cell division protein kinase 14) (Serine/threonine-protein kinase PFTAIRE-1) (hPFTAIRE1)                                            |
| O94933 | SLITRK3 KIAA0848             | SLIT and NTRK-like protein 3                                                                                                                                                   |
| O94953 | KDM4B JHDM3B JMJD2B KIAA0876 | Lysine-specific demethylase 4B (EC 1.14.11.-) (JmjC domain-containing histone demethylation protein 3B) (Jumonji domain-containing protein 2B)                                 |
| O94967 | WDR47 KIAA0893               | WD repeat-containing protein 47 (Neuronal enriched MAP-interacting protein) (Nemitin)                                                                                          |
| O94991 | SLITRK5 KIAA0918 LRRC11      | SLIT and NTRK-like protein 5 (Leucine-rich repeat-containing protein 11)                                                                                                       |
| O94992 | HEXIM1 CLP1 EDG1 HIS1 MAQ1   | Protein HEXIM1 (Cardiac lineage protein 1) (Estrogen down-regulated gene 1 protein) (Hexamethylene bis-acetamide-inducible protein 1) (Menage a quatre protein 1)              |
| O95071 | UBR5 EDD EDD1 HYD KIAA0896   | E3 ubiquitin-protein ligase UBR5 (EC 6.3.2.-) (E3 ubiquitin-protein ligase, HECT domain-containing 1) (Hyperplastic discs protein homolog) (hHYD) (Progestin-induced protein)  |
| O95163 | IKBKAP ELP1 IKAP             | Elongator complex protein 1 (ELP1) (IkappaB kinase complex-associated protein) (IKK complex-associated protein) (p150)                                                         |
| O95170 | CDRT1 C17orf1 C17orf1A HREP  | CMT1A duplicated region transcript 1 protein                                                                                                                                   |



|        |                                    |                                                                                                                                                                                                                                                                                                |
|--------|------------------------------------|------------------------------------------------------------------------------------------------------------------------------------------------------------------------------------------------------------------------------------------------------------------------------------------------|
| O95201 | ZNF205 ZNF210                      | Zinc finger protein 205 (Zinc finger protein 210)                                                                                                                                                                                                                                              |
| O95218 | ZRANB2 ZIS ZNF265                  | Zinc finger Ran-binding domain-containing protein 2 (Zinc finger protein 265) (Zinc finger, splicing)                                                                                                                                                                                          |
| O95232 | LUC7L3 CREAP1 CROP O48             | Luc7-like protein 3 (Cisplatin resistance-associated-overexpressed protein) (Luc7A) (Okadaic acid-inducible phosphoprotein OA48-18) (cAMP regulatory element-associated protein 1) (CRE-associated protein 1) (CREAP-1)                                                                        |
| O95255 | ABCC6 ARA MRP6                     | Multidrug resistance-associated protein 6 (ATP-binding cassette sub-family C member 6) (Anthracycline resistance-associated protein) (Multi-specific organic anion transporter E) (MOAT-E)                                                                                                     |
| O95260 | ATE1                               | Arginyl-tRNA--protein transferase 1 (Arginyltransferase 1) (R-transferase 1) (EC 2.3.2.8) (Arginine-tRNA--protein transferase 1)                                                                                                                                                               |
| O95271 | TNKS PARP5A PARPL TIN1 TINF1 TNKS1 | Tankyrase-1 (TANK1) (EC 2.4.2.30) (ADP-ribosyltransferase diphtheria toxin-like 5) (ARTD5) (Poly [ADP-ribose] polymerase 5A) (TNKS-1) (TRF1-interacting ankyrin-related ADP-ribose polymerase) (Tankyrase I)                                                                                   |
| O95319 | CELF2 BRUNOL3 CUGBP2 ETR3 NAPOR    | CUGBP Elav-like family member 2 (CELF-2) (Bruno-like protein 3) (CUG triplet repeat RNA-binding protein 2) (CUG-BP2) (CUG-BP- and ETR-3-like factor 2) (ELAV-type RNA-binding protein 3) (ETR-3) (Neuroblastoma apoptosis-related RNA-binding protein) (hNAPOR) (RNA-binding protein BRUNOL-3) |
| O95342 | ABCB11 BSEP                        | Bile salt export pump (ATP-binding cassette sub-family B member 11)                                                                                                                                                                                                                            |
| O95363 | FARS2 FARS1 HSPC320                | Phenylalanine--tRNA ligase, mitochondrial (EC 6.1.1.20) (Phenylalanyl-tRNA synthetase) (PheRS)                                                                                                                                                                                                 |
| O95382 | MAP3K6 ASK2 MAPKKK6 MEKK6          | Mitogen-activated protein kinase kinase kinase 6 (EC 2.7.11.25) (Apoptosis signal-regulating kinase 2)                                                                                                                                                                                         |
| O95391 | SLU7                               | Pre-mRNA-splicing factor SLU7 (hSlu7)                                                                                                                                                                                                                                                          |
| O95409 | ZIC2                               | Zinc finger protein ZIC 2 (Zinc finger protein of the cerebellum 2)                                                                                                                                                                                                                            |
| O95453 | PARN DAN                           | Poly(A)-specific ribonuclease PARN (EC 3.1.13.4) (Deadenylating nuclease) (Deadenylation nuclease) (Polyadenylate-specific ribonuclease)                                                                                                                                                       |
| O95477 | ABCA1 ABC1 CERP                    | ATP-binding cassette sub-family A member 1 (ATP-binding cassette transporter 1) (ABC-1) (ATP-binding cassette 1) (Cholesterol efflux regulatory protein)                                                                                                                                       |
| O95551 | TDP2 EAP2 TTRAP AD-022             | Tyrosyl-DNA phosphodiesterase 2 (Tyr-DNA phosphodiesterase 2) (hTDP2) (EC 3.1.4.-) (5'-tyrosyl-DNA phosphodiesterase) (5'-Tyr-DNA phosphodiesterase) (ETS1-associated                                                                                                                          |

|        |                                 |                                                                                                                                                                                                                                    |
|--------|---------------------------------|------------------------------------------------------------------------------------------------------------------------------------------------------------------------------------------------------------------------------------|
|        |                                 | protein 2) (ETS1-associated protein II) (EAPII) (TRAF and TNF receptor-associated protein) (Tyrosyl-RNA phosphodiesterase) (VPg unlinkase)                                                                                         |
| O95602 | POLR1A                          | DNA-directed RNA polymerase I subunit RPA1 (RNA polymerase I subunit A1) (EC 2.7.7.6) (A190) (DNA-directed RNA polymerase I largest subunit) (DNA-directed RNA polymerase I subunit A) (RNA polymerase I 194 kDa subunit) (RPA194) |
| O95620 | DUS4L                           | tRNA-dihydrouridine(20a/20b) synthase [NAD(P)+]-like (EC 1.3.1.-) (pp35) (tRNA-dihydrouridine synthase 4-like)                                                                                                                     |
| O95628 | CNOT4 NOT4                      | CCR4-NOT transcription complex subunit 4 (EC 6.3.2.-) (CCR4-associated factor 4) (E3 ubiquitin-protein ligase CNOT4) (Potential transcriptional repressor NOT4Hp)                                                                  |
| O95747 | OXSRI KIAA1101 OSR1             | Serine/threonine-protein kinase OSR1 (EC 2.7.11.1) (Oxidative stress-responsive 1 protein)                                                                                                                                         |
| O95758 | PTBP3 ROD1                      | Polypyrimidine tract-binding protein 3 (Regulator of differentiation 1) (Rod1)                                                                                                                                                     |
| O95777 | LSM8                            | U6 snRNA-associated Sm-like protein LSM8                                                                                                                                                                                           |
| O95780 | ZNF682                          | Zinc finger protein 682                                                                                                                                                                                                            |
| O95786 | DDX58                           | Probable ATP-dependent RNA helicase DDX58 (EC 3.6.4.13) (DEAD box protein 58) (RIG-I-like receptor 1) (RLR-1) (Retinoic acid-inducible gene 1 protein) (RIG-1) (Retinoic acid-inducible gene 1 protein) (RIG-I)                    |
| O95793 | STAU1 STAU                      | Double-stranded RNA-binding protein Staufen homolog 1                                                                                                                                                                              |
| O95819 | MAP4K4 HGK KIAA0687 NIK         | Mitogen-activated protein kinase kinase kinase 4 (EC 2.7.11.1) (HPK/GCK-like kinase HGK) (MAPK/ERK kinase kinase kinase 4) (MEK kinase kinase 4) (MEKKK 4) (Nck-interacting kinase)                                                |
| O95834 | EML2 EMAP2 EMAPL2               | Echinoderm microtubule-associated protein-like 2 (EMAP-2) (HuEMAP-2)                                                                                                                                                               |
| O95835 | LATS1 WARTS                     | Serine/threonine-protein kinase LATS1 (EC 2.7.11.1) (Large tumor suppressor homolog 1) (WARTS protein kinase) (h-warts)                                                                                                            |
| O95863 | SNAI1 SNAH                      | Zinc finger protein SNAI1 (Protein snail homolog 1) (Protein sna)                                                                                                                                                                  |
| O95872 | GPANK1 ANKRD59 BAT4 G5 GPATCH10 | G patch domain and ankyrin repeat-containing protein 1 (Ankyrin repeat domain-containing protein 59) (G patch domain-containing protein 10) (HLA-B-associated transcript 4) (Protein G5)                                           |
| O95900 | TRUB2                           | Probable tRNA pseudouridine synthase 2 (EC 5.4.99.-)                                                                                                                                                                               |
| O95926 | SYF2 CBPIN GCIP                 | Pre-mRNA-splicing factor SYF2 (CCNDBP1-interactor) (p29)                                                                                                                                                                           |
| O96013 | PAK4 KIAA1142                   | Serine/threonine-protein kinase PAK 4 (EC 2.7.11.1) (p21-activated kinase 4) (PAK-4)                                                                                                                                               |

|        |                       |                                                                                                                                                                                                                                                         |
|--------|-----------------------|---------------------------------------------------------------------------------------------------------------------------------------------------------------------------------------------------------------------------------------------------------|
| O96017 | CHEK2 CDS1 CHK2 RAD53 | Serine/threonine-protein kinase Chk2 (EC 2.7.11.1) (CHK2 checkpoint homolog) (Cds1 homolog) (Hucds1) (hCds1) (Checkpoint kinase 2)                                                                                                                      |
| P00709 | LALBA LYZL7           | Alpha-lactalbumin (Lactose synthase B protein) (Lysozyme-like protein 7)                                                                                                                                                                                |
| P00734 | F2                    | Prothrombin (EC 3.4.21.5) (Coagulation factor II) [Cleaved into: Activation peptide fragment 1; Activation peptide fragment 2; Thrombin light chain; Thrombin heavy chain]                                                                              |
| P00736 | C1R                   | Complement C1r subcomponent (EC 3.4.21.41) (Complement component 1 subcomponent r) [Cleaved into: Complement C1r subcomponent heavy chain; Complement C1r subcomponent light chain]                                                                     |
| P00738 | HP                    | Haptoglobin (Zonulin) [Cleaved into: Haptoglobin alpha chain; Haptoglobin beta chain]                                                                                                                                                                   |
| P00739 | HPR                   | Haptoglobin-related protein                                                                                                                                                                                                                             |
| P00740 | F9                    | Coagulation factor IX (EC 3.4.21.22) (Christmas factor) (Plasma thromboplastin component) (PTC) [Cleaved into: Coagulation factor IXa light chain; Coagulation factor IXa heavy chain]                                                                  |
| P00742 | F10                   | Coagulation factor X (EC 3.4.21.6) (Stuart factor) (Stuart-Prower factor) [Cleaved into: Factor X light chain; Factor X heavy chain; Activated factor Xa heavy chain]                                                                                   |
| P00746 | CFD DF PFD            | Complement factor D (EC 3.4.21.46) (Adipsin) (C3 convertase activator) (Properdin factor D)                                                                                                                                                             |
| P00747 | PLG                   | Plasminogen (EC 3.4.21.7) [Cleaved into: Plasmin heavy chain A; Activation peptide; Angiostatin; Plasmin heavy chain A, short form; Plasmin light chain B]                                                                                              |
| P00748 | F12                   | Coagulation factor XII (EC 3.4.21.38) (Hageman factor) (HAF) [Cleaved into: Coagulation factor XIIa heavy chain; Beta-factor XIIa part 1; Coagulation factor XIIa light chain (Beta-factor XIIa part 2)]                                                |
| P00749 | PLAU                  | Urokinase-type plasminogen activator (U-plasminogen activator) (uPA) (EC 3.4.21.73) [Cleaved into: Urokinase-type plasminogen activator long chain A; Urokinase-type plasminogen activator short chain A; Urokinase-type plasminogen activator chain B] |
| P00750 | PLAT                  | Tissue-type plasminogen activator (t-PA) (t-plasminogen activator) (tPA) (EC 3.4.21.68) (Alteplase) (Reteplase) [Cleaved into: Tissue-type plasminogen activator chain A; Tissue-type plasminogen activator chain B]                                    |
| P00751 | CFB BF BFD            | Complement factor B (EC 3.4.21.47) (C3/C5 convertase) (Glycine-rich beta glycoprotein) (GBG) (PBF2) (Properdin factor B) [Cleaved into: Complement factor                                                                                               |

|        |           |                                                                                                                     |
|--------|-----------|---------------------------------------------------------------------------------------------------------------------|
|        |           | B Ba fragment; Complement factor B Bb fragment]                                                                     |
| P00973 | OAS1 OIAS | 2'-5'-oligoadenylate synthase 1 ((2-5')oligo(A) synthase 1) (2-5A synthase 1) (EC 2.7.7.84) (E18/E16) (p46/p42 OAS) |
| P01593 |           | Ig kappa chain V-I region AG                                                                                        |
| P01594 |           | Ig kappa chain V-I region AU                                                                                        |
| P01595 |           | Ig kappa chain V-I region Bi                                                                                        |
| P01596 |           | Ig kappa chain V-I region CAR                                                                                       |
| P01597 |           | Ig kappa chain V-I region DEE                                                                                       |
| P01598 |           | Ig kappa chain V-I region EU                                                                                        |
| P01599 |           | Ig kappa chain V-I region Gal                                                                                       |
| P01600 |           | Ig kappa chain V-I region Hau                                                                                       |
| P01601 | IGKV1D-16 | Ig kappa chain V-ID region 16 (Ig kappa chain V-I region HK101) (Fragment)                                          |
| P01602 | IGKV1-5   | Ig heavy chain V-I region 5 (Ig kappa chain V-I region HK102) (Immunoglobulin kappa variable 1-5) (Fragment)        |
| P01603 |           | Ig kappa chain V-I region Ka                                                                                        |
| P01604 |           | Ig kappa chain V-I region Kue                                                                                       |
| P01605 |           | Ig kappa chain V-I region Lay                                                                                       |
| P01606 |           | Ig kappa chain V-I region OU                                                                                        |
| P01607 |           | Ig kappa chain V-I region Rei                                                                                       |
| P01608 |           | Ig kappa chain V-I region Roy                                                                                       |
| P01609 |           | Ig kappa chain V-I region Scw                                                                                       |
| P01610 |           | Ig kappa chain V-I region WEA                                                                                       |
| P01611 |           | Ig kappa chain V-I region Wes                                                                                       |
| P01612 |           | Ig kappa chain V-I region Mev                                                                                       |
| P01613 |           | Ig kappa chain V-I region Ni                                                                                        |
| P01614 |           | Ig kappa chain V-II region Cum                                                                                      |
| P01615 |           | Ig kappa chain V-II region FR                                                                                       |
| P01616 |           | Ig kappa chain V-II region MIL                                                                                      |
| P01617 |           | Ig kappa chain V-II region TEW                                                                                      |
| P01619 |           | Ig kappa chain V-III region B6                                                                                      |
| P01620 |           | Ig kappa chain V-III region SIE                                                                                     |
| P01621 |           | Ig kappa chain V-III region NG9 (Fragment)                                                                          |
| P01622 |           | Ig kappa chain V-III region Ti                                                                                      |
| P01623 |           | Ig kappa chain V-III region WOL                                                                                     |
| P01624 |           | Ig kappa chain V-III region POM                                                                                     |
| P01625 |           | Ig kappa chain V-IV region Len                                                                                      |
| P01699 |           | Ig lambda chain V-I region VOR                                                                                      |
| P01700 |           | Ig lambda chain V-I region HA                                                                                       |
| P01701 |           | Ig lambda chain V-I region NEW                                                                                      |
| P01702 |           | Ig lambda chain V-I region NIG-64                                                                                   |
| P01703 |           | Ig lambda chain V-I region NEWM                                                                                     |
| P01704 |           | Ig lambda chain V-II region TOG                                                                                     |

|        |          |                                                                                                        |
|--------|----------|--------------------------------------------------------------------------------------------------------|
| P01705 |          | Ig lambda chain V-II region NEI                                                                        |
| P01706 |          | Ig lambda chain V-II region BOH                                                                        |
| P01707 |          | Ig lambda chain V-II region TRO                                                                        |
| P01708 |          | Ig lambda chain V-II region BUR                                                                        |
| P01709 |          | Ig lambda chain V-II region MGC                                                                        |
| P01710 |          | Ig lambda chain V-II region BO                                                                         |
| P01711 |          | Ig lambda chain V-II region VIL                                                                        |
| P01712 |          | Ig lambda chain V-II region WIN                                                                        |
| P01713 |          | Ig lambda chain V-II region NIG-58                                                                     |
| P01714 |          | Ig lambda chain V-III region SH                                                                        |
| P01715 |          | Ig lambda chain V-IV region Bau                                                                        |
| P01716 |          | Ig lambda chain V-IV region X                                                                          |
| P01717 |          | Ig lambda chain V-IV region Hil                                                                        |
| P01718 |          | Ig lambda chain V-IV region Kern                                                                       |
| P01719 |          | Ig lambda chain V-V region DEL                                                                         |
| P01720 |          | Ig lambda chain V-VII region MOT                                                                       |
| P01721 |          | Ig lambda chain V-VI region AR                                                                         |
| P01722 |          | Ig lambda chain V-VI region NIG-48                                                                     |
| P01742 |          | Ig heavy chain V-I region EU                                                                           |
| P01743 |          | Ig heavy chain V-I region HG3                                                                          |
| P01744 |          | Ig heavy chain V-I region ND (Fragments)                                                               |
| P01760 |          | Ig heavy chain V-I region WOL                                                                          |
| P01761 |          | Ig heavy chain V-I region SIE                                                                          |
| P01762 |          | Ig heavy chain V-III region TRO                                                                        |
| P01763 |          | Ig heavy chain V-III region WEA                                                                        |
| P01764 | IGHV3-23 | Ig heavy chain V-III region 23 (Ig heavy chain V-III region VH26) (Immunoglobulin heavy variable 3-23) |
| P01765 |          | Ig heavy chain V-III region TIL                                                                        |
| P01766 |          | Ig heavy chain V-III region BRO                                                                        |
| P01767 |          | Ig heavy chain V-III region BUT                                                                        |
| P01768 |          | Ig heavy chain V-III region CAM                                                                        |
| P01769 |          | Ig heavy chain V-III region GA                                                                         |
| P01770 |          | Ig heavy chain V-III region NIE                                                                        |
| P01771 |          | Ig heavy chain V-III region HIL                                                                        |
| P01772 |          | Ig heavy chain V-III region KOL                                                                        |
| P01773 |          | Ig heavy chain V-III region BUR                                                                        |
| P01774 |          | Ig heavy chain V-III region POM                                                                        |
| P01775 |          | Ig heavy chain V-III region LAY                                                                        |
| P01776 |          | Ig heavy chain V-III region WAS                                                                        |
| P01777 |          | Ig heavy chain V-III region TEI                                                                        |
| P01778 |          | Ig heavy chain V-III region ZAP                                                                        |
| P01779 |          | Ig heavy chain V-III region TUR                                                                        |
| P01780 |          | Ig heavy chain V-III region JON                                                                        |
| P01781 |          | Ig heavy chain V-III region GAL                                                                        |

|        |            |                                                                                                                                                                                                                                                      |
|--------|------------|------------------------------------------------------------------------------------------------------------------------------------------------------------------------------------------------------------------------------------------------------|
| P01782 |            | Ig heavy chain V-III region DOB                                                                                                                                                                                                                      |
| P01814 |            | Ig heavy chain V-II region OU                                                                                                                                                                                                                        |
| P01815 |            | Ig heavy chain V-II region COR                                                                                                                                                                                                                       |
| P01816 |            | Ig heavy chain V-II region DAW                                                                                                                                                                                                                       |
| P01817 |            | Ig heavy chain V-II region MCE                                                                                                                                                                                                                       |
| P01818 |            | Ig heavy chain V-II region HE                                                                                                                                                                                                                        |
| P01824 |            | Ig heavy chain V-II region WAH                                                                                                                                                                                                                       |
| P01825 |            | Ig heavy chain V-II region NEWM                                                                                                                                                                                                                      |
| P01834 | IGKC       | Ig kappa chain C region                                                                                                                                                                                                                              |
| P01854 | IGHE       | Ig epsilon chain C region                                                                                                                                                                                                                            |
| P01857 | IGHG1      | Ig gamma-1 chain C region                                                                                                                                                                                                                            |
| P01859 | IGHG2      | Ig gamma-2 chain C region                                                                                                                                                                                                                            |
| P01860 | IGHG3      | Ig gamma-3 chain C region (HDC) (Heavy chain disease protein)                                                                                                                                                                                        |
| P01861 | IGHG4      | Ig gamma-4 chain C region                                                                                                                                                                                                                            |
| P01871 | IGHM       | Ig mu chain C region                                                                                                                                                                                                                                 |
| P01876 | IGHA1      | Ig alpha-1 chain C region                                                                                                                                                                                                                            |
| P01877 | IGHA2      | Ig alpha-2 chain C region                                                                                                                                                                                                                            |
| P01880 | IGHD       | Ig delta chain C region                                                                                                                                                                                                                              |
| P02750 | LRG1 LRG   | Leucine-rich alpha-2-glycoprotein (LRG)                                                                                                                                                                                                              |
| P03951 | F11        | Coagulation factor XI (FXI) (EC 3.4.21.27) (Plasma thromboplastin antecedent) (PTA) [Cleaved into: Coagulation factor XIa heavy chain; Coagulation factor XIa light chain]                                                                           |
| P03952 | KLKB1 KLK3 | Plasma kallikrein (EC 3.4.21.34) (Fletcher factor) (Kininogenin) (Plasma prekallikrein) (PKK) [Cleaved into: Plasma kallikrein heavy chain; Plasma kallikrein light chain]                                                                           |
| P04049 | RAF1 RAF   | RAF proto-oncogene serine/threonine-protein kinase (EC 2.7.11.1) (Proto-oncogene c-RAF) (cRaf) (Raf-1)                                                                                                                                               |
| P04070 | PROC       | Vitamin K-dependent protein C (EC 3.4.21.69) (Anticoagulant protein C) (Autoprothrombin IIA) (Blood coagulation factor XIV) [Cleaved into: Vitamin K-dependent protein C light chain; Vitamin K-dependent protein C heavy chain; Activation peptide] |
| P04206 |            | Ig kappa chain V-III region GOL (Rheumatoid factor)                                                                                                                                                                                                  |
| P04207 |            | Ig kappa chain V-III region CLL (Rheumatoid factor)                                                                                                                                                                                                  |
| P04208 |            | Ig lambda chain V-I region WAH                                                                                                                                                                                                                       |
| P04209 |            | Ig lambda chain V-II region NIG-84                                                                                                                                                                                                                   |
| P04211 |            | Ig lambda chain V region 4A                                                                                                                                                                                                                          |
| P04220 |            | Ig mu heavy chain disease protein (BOT)                                                                                                                                                                                                              |
| P04430 |            | Ig kappa chain V-I region BAN                                                                                                                                                                                                                        |
| P04431 |            | Ig kappa chain V-I region Walker                                                                                                                                                                                                                     |
| P04432 |            | Ig kappa chain V-I region Daudi                                                                                                                                                                                                                      |

|        |                                |                                                                                                                                                                                             |
|--------|--------------------------------|---------------------------------------------------------------------------------------------------------------------------------------------------------------------------------------------|
| P04433 |                                | Ig kappa chain V-III region VG (Fragment)                                                                                                                                                   |
| P04434 |                                | Ig kappa chain V-III region VH (Fragment)                                                                                                                                                   |
| P04437 | TCRA                           | T-cell receptor alpha chain V region CTL-L17                                                                                                                                                |
| P04438 |                                | Ig heavy chain V-II region SESS                                                                                                                                                             |
| P05129 | PRKCG PKCG                     | Protein kinase C gamma type (PKC-gamma) (EC 2.7.11.13)                                                                                                                                      |
| P05156 | CFI IF                         | Complement factor I (EC 3.4.21.45) (C3B/C4B inactivator) [Cleaved into: Complement factor I heavy chain; Complement factor I light chain]                                                   |
| P05161 | ISG15 G1P2 UCRP                | Ubiquitin-like protein ISG15 (Interferon-induced 15 kDa protein) (Interferon-induced 17 kDa protein) (IP17) (Ubiquitin cross-reactive protein) (hUCRP)                                      |
| P05198 | EIF2S1 EIF2A                   | Eukaryotic translation initiation factor 2 subunit 1 (Eukaryotic translation initiation factor 2 subunit alpha) (eIF-2-alpha) (eIF-2A) (eIF-2alpha)                                         |
| P05388 | RPLP0                          | 60S acidic ribosomal protein P0 (60S ribosomal protein L10E)                                                                                                                                |
| P05423 | POLR3D BN51 BN51T              | DNA-directed RNA polymerase III subunit RPC4 (RNA polymerase III subunit C4) (DNA-directed RNA polymerase III subunit D) (Protein BN51) (RNA polymerase III 47 kDa subunit) (RPC53 homolog) |
| P05455 | SSB                            | Lupus La protein (La autoantigen) (La ribonucleoprotein) (Sjogren syndrome type B antigen) (SS-B)                                                                                           |
| P05771 | PRKCB PKCB PRKCB1              | Protein kinase C beta type (PKC-B) (PKC-beta) (EC 2.7.11.13)                                                                                                                                |
| P05981 | HPN TMPRSS1                    | Serine protease hepsin (EC 3.4.21.106) (Transmembrane protease serine 1) [Cleaved into: Serine protease hepsin non-catalytic chain; Serine protease hepsin catalytic chain]                 |
| P06309 |                                | Ig kappa chain V-II region GM607 (Fragment)                                                                                                                                                 |
| P06310 |                                | Ig kappa chain V-II region RPMI 6410                                                                                                                                                        |
| P06311 |                                | Ig kappa chain V-III region IARC/BL41                                                                                                                                                       |
| P06312 | IGKV4-1                        | Ig kappa chain V-IV region (Fragment)                                                                                                                                                       |
| P06313 |                                | Ig kappa chain V-IV region JI                                                                                                                                                               |
| P06314 |                                | Ig kappa chain V-IV region B17                                                                                                                                                              |
| P06315 |                                | Ig kappa chain V region EV15                                                                                                                                                                |
| P06316 |                                | Ig lambda chain V-I region BL2                                                                                                                                                              |
| P06317 |                                | Ig lambda chain V-VI region SUT                                                                                                                                                             |
| P06318 |                                | Ig lambda chain V-VI region WLT                                                                                                                                                             |
| P06319 |                                | Ig lambda chain V-VI region EB4                                                                                                                                                             |
| P06326 |                                | Ig heavy chain V-I region Mot                                                                                                                                                               |
| P06331 |                                | Ig heavy chain V-II region ARH-77                                                                                                                                                           |
| P06493 | CDK1 CDC2 CDC28A CDKN1 P34CDC2 | Cyclin-dependent kinase 1 (CDK1) (EC 2.7.11.22) (EC 2.7.11.23) (Cell division control protein 2 homolog) (Cell division                                                                     |

|        |                                  |                                                                                                                                                                                                                                                                                                                       |
|--------|----------------------------------|-----------------------------------------------------------------------------------------------------------------------------------------------------------------------------------------------------------------------------------------------------------------------------------------------------------------------|
|        |                                  | protein kinase 1) (p34 protein kinase)                                                                                                                                                                                                                                                                                |
| P06681 | C2                               | Complement C2 (EC 3.4.21.43) (C3/C5 convertase) [Cleaved into: Complement C2b fragment; Complement C2a fragment]                                                                                                                                                                                                      |
| P06730 | EIF4E EIF4EL1 EIF4F              | Eukaryotic translation initiation factor 4E (eIF-4E) (eIF4E) (eIF-4F 25 kDa subunit) (mRNA cap-binding protein)                                                                                                                                                                                                       |
| P06870 | KLK1                             | Kallikrein-1 (EC 3.4.21.35) (Kidney/pancreas/salivary gland kallikrein) (Tissue kallikrein)                                                                                                                                                                                                                           |
| P06887 |                                  | Ig lambda chain V-I region MEM                                                                                                                                                                                                                                                                                        |
| P06888 |                                  | Ig lambda chain V-I region EPS                                                                                                                                                                                                                                                                                        |
| P06889 |                                  | Ig lambda chain V-IV region MOL                                                                                                                                                                                                                                                                                       |
| P07288 | KLK3 APS                         | Prostate-specific antigen (PSA) (EC 3.4.21.77) (Gamma-seminoprotein) (Seminin) (Kallikrein-3) (P-30 antigen) (Semenogelase)                                                                                                                                                                                           |
| P07477 | PRSS1 TRP1 TRY1 TRYP1            | Trypsin-1 (EC 3.4.21.4) (Beta-trypsin) (Cationic trypsinogen) (Serine protease 1) (Trypsin I) [Cleaved into: Alpha-trypsin chain 1; Alpha-trypsin chain 2]                                                                                                                                                            |
| P07478 | PRSS2 TRY2 TRYP2                 | Trypsin-2 (EC 3.4.21.4) (Anionic trypsinogen) (Serine protease 2) (Trypsin II)                                                                                                                                                                                                                                        |
| P07585 | DCN SLRR1B                       | Decorin (Bone proteoglycan II) (PG-S2) (PG40)                                                                                                                                                                                                                                                                         |
| P07814 | EPRS GLNS PARS QARS QPRS PIG32   | Bifunctional glutamate/proline--tRNA ligase (Bifunctional aminoacyl-tRNA synthetase) (Cell proliferation-inducing gene 32 protein) (Glutamyl-prolyl-tRNA synthetase) [Includes: Glutamate--tRNA ligase (EC 6.1.1.17) (Glutamyl-tRNA synthetase) (GluRS); Proline--tRNA ligase (EC 6.1.1.15) (Prolyl-tRNA synthetase)] |
| P07910 | HNRNPC HNRPC                     | Heterogeneous nuclear ribonucleoproteins C1/C2 (hnRNP C1/C2)                                                                                                                                                                                                                                                          |
| P08048 | ZFY                              | Zinc finger Y-chromosomal protein                                                                                                                                                                                                                                                                                     |
| P08183 | ABCB1 MDR1 PGY1                  | Multidrug resistance protein 1 (EC 3.6.3.44) (ATP-binding cassette sub-family B member 1) (P-glycoprotein 1) (CD antigen CD243)                                                                                                                                                                                       |
| P08217 | CELA2A ELA2A                     | Chymotrypsin-like elastase family member 2A (EC 3.4.21.71) (Elastase-2A)                                                                                                                                                                                                                                              |
| P08218 | CELA2B ELA2B                     | Chymotrypsin-like elastase family member 2B (EC 3.4.21.71) (Elastase-2B)                                                                                                                                                                                                                                              |
| P08240 | SRPR                             | Signal recognition particle receptor subunit alpha (SR-alpha) (Docking protein alpha) (DP-alpha)                                                                                                                                                                                                                      |
| P08519 | LPA                              | Apolipoprotein(a) (Apo(a)) (Lp(a)) (EC 3.4.21.-)                                                                                                                                                                                                                                                                      |
| P08579 | SNRPB2                           | U2 small nuclear ribonucleoprotein B" (U2 snRNP B")                                                                                                                                                                                                                                                                   |
| P08621 | SNRNP70 RNPU1Z RPU1 SNRP70 U1AP1 | U1 small nuclear ribonucleoprotein 70 kDa (U1 snRNP 70 kDa) (U1-70K) (snRNP70)                                                                                                                                                                                                                                        |
| P08709 | F7                               | Coagulation factor VII (EC 3.4.21.21) (Proconvertin) (Serum prothrombin conversion accelerator) (SPCA) (Eptacog alfa) [Cleaved into: Factor VII light chain;                                                                                                                                                          |



|        |                     |                                                                                                                                                                                                                                                                                                                                   |
|--------|---------------------|-----------------------------------------------------------------------------------------------------------------------------------------------------------------------------------------------------------------------------------------------------------------------------------------------------------------------------------|
|        |                     | Factor VII heavy chain]                                                                                                                                                                                                                                                                                                           |
| P08861 | CELA3B ELA3B        | Chymotrypsin-like elastase family member 3B (EC 3.4.21.70) (Elastase IIIB) (Elastase-3B) (Protease E)                                                                                                                                                                                                                             |
| P08865 | RPSA LAMBR LAMR1    | 40S ribosomal protein SA (37 kDa laminin receptor precursor) (37LRP) (37/67 kDa laminin receptor) (LRP/LR) (67 kDa laminin receptor) (67LR) (Colon carcinoma laminin-binding protein) (Laminin receptor 1) (LamR) (Laminin-binding protein precursor p40) (LBP/p40) (Multidrug resistance-associated protein MGr1-Ag) (NEM/1CHD4) |
| P09001 | MRPL3 MRL3 RPML3    | 39S ribosomal protein L3, mitochondrial (L3mt) (MRP-L3)                                                                                                                                                                                                                                                                           |
| P09012 | SNRPA               | U1 small nuclear ribonucleoprotein A (U1 snRNP A) (U1-A) (U1A)                                                                                                                                                                                                                                                                    |
| P09093 | CELA3A ELA3 ELA3A   | Chymotrypsin-like elastase family member 3A (EC 3.4.21.70) (Elastase IIIA) (Elastase-3A) (Protease E)                                                                                                                                                                                                                             |
| P09132 | SRP19               | Signal recognition particle 19 kDa protein (SRP19)                                                                                                                                                                                                                                                                                |
| P09234 | SNRPC               | U1 small nuclear ribonucleoprotein C (U1 snRNP C) (U1-C) (U1C)                                                                                                                                                                                                                                                                    |
| P09543 | CNP                 | 2',3'-cyclic-nucleotide 3'-phosphodiesterase (CNP) (CNPase) (EC 3.1.4.37)                                                                                                                                                                                                                                                         |
| P09651 | HNRNPA1 HNRPA1      | Heterogeneous nuclear ribonucleoprotein A1 (hnRNP A1) (Helix-destabilizing protein) (Single-strand RNA-binding protein) (hnRNP core protein A1) [Cleaved into: Heterogeneous nuclear ribonucleoprotein A1, N-terminally processed]                                                                                                |
| P09661 | SNRPA1              | U2 small nuclear ribonucleoprotein A' (U2 snRNP A')                                                                                                                                                                                                                                                                               |
| P09871 | C1S                 | Complement C1s subcomponent (EC 3.4.21.42) (C1 esterase) (Complement component 1 subcomponent s) [Cleaved into: Complement C1s subcomponent heavy chain; Complement C1s subcomponent light chain]                                                                                                                                 |
| P0C1S8 | WEE2 WEE1B          | Wee1-like protein kinase 2 (EC 2.7.10.2) (Wee1-like protein kinase 1B) (Wee1B kinase)                                                                                                                                                                                                                                             |
| P0C6S8 | LINGO3 LERN2 LRRN6B | Leucine-rich repeat and immunoglobulin-like domain-containing nogo receptor-interacting protein 3 (Leucine-rich repeat neuronal protein 2) (Leucine-rich repeat neuronal protein 6B)                                                                                                                                              |
| P0C7P1 | RBMV1D              | RNA-binding motif protein, Y chromosome, family 1 member D                                                                                                                                                                                                                                                                        |
| P0C7Q3 | FAM58BP FAM58B      | Putative cyclin-related protein FAM58B                                                                                                                                                                                                                                                                                            |
| P0C7T5 | ATXN1L BOAT BOAT1   | Ataxin-1-like (Brother of ataxin-1) (Brother of ATXN1)                                                                                                                                                                                                                                                                            |
| P0C7V8 | DCAF8L2 WDR42C      | DDB1- and CUL4-associated factor 8-like protein 2 (WD repeat-containing protein 42C)                                                                                                                                                                                                                                              |
| P0CB38 | PABPC4L             | Polyadenylate-binding protein 4-like (PABP-4-like) (Poly(A)-binding protein 4-                                                                                                                                                                                                                                                    |

|        |                              |                                                                                                                                                                                                                                                                |
|--------|------------------------------|----------------------------------------------------------------------------------------------------------------------------------------------------------------------------------------------------------------------------------------------------------------|
|        |                              | like)                                                                                                                                                                                                                                                          |
| P0CF74 | IGLC6                        | Ig lambda-6 chain C region                                                                                                                                                                                                                                     |
| P0CF75 | EBLN1                        | Endogenous Bornavirus-like nucleoprotein 1 (Endogenous Borna-like N element-1) (EBLN-1)                                                                                                                                                                        |
| P0CG04 | IGLC1                        | Ig lambda-1 chain C regions                                                                                                                                                                                                                                    |
| P0CG05 | IGLC2                        | Ig lambda-2 chain C regions                                                                                                                                                                                                                                    |
| P0CG06 | IGLC3                        | Ig lambda-3 chain C regions                                                                                                                                                                                                                                    |
| P0CG24 | ZNF883                       | Zinc finger protein 883                                                                                                                                                                                                                                        |
| P0CG31 | ZNF286B ZNF286C ZNF286L      | Putative zinc finger protein 286B                                                                                                                                                                                                                              |
| P0CG38 | POTEI                        | POTE ankyrin domain family member I                                                                                                                                                                                                                            |
| P0CG39 | POTEJ                        | POTE ankyrin domain family member J                                                                                                                                                                                                                            |
| P0CG47 | UBB                          | Polyubiquitin-B [Cleaved into: Ubiquitin]                                                                                                                                                                                                                      |
| P0CG48 | UBC                          | Polyubiquitin-C [Cleaved into: Ubiquitin]                                                                                                                                                                                                                      |
| P0CJ78 | ZNF865                       | Zinc finger protein 865                                                                                                                                                                                                                                        |
| P0CJ79 | ZNF888                       | Zinc finger protein 888                                                                                                                                                                                                                                        |
| P0CW18 | PRSS56                       | Serine protease 56 (EC 3.4.21.-)                                                                                                                                                                                                                               |
| P0DJD3 | RBM1A1 RBM1 RBM2 YRRM1 YRRM2 | RNA-binding motif protein, Y chromosome, family 1 member A1 (RNA-binding motif protein 1) (RNA-binding motif protein 2) (Y chromosome RNA recognition motif 1) (hRBM1)                                                                                         |
| P0DJD4 | RBM1C                        | RNA-binding motif protein, Y chromosome, family 1 member C                                                                                                                                                                                                     |
| P0DKX0 | ZNF728                       | Zinc finger protein 728                                                                                                                                                                                                                                        |
| P10072 | HKR1 ZNF875                  | Krueppel-related zinc finger protein 1 (Protein HKR1) (Zinc finger protein 875)                                                                                                                                                                                |
| P10073 | ZSCAN22 HKR2 ZNF50           | Zinc finger and SCAN domain-containing protein 22 (Krueppel-related zinc finger protein 2) (Protein HKR2) (Zinc finger protein 50)                                                                                                                             |
| P10155 | TROVE2 RO60 SSA2             | 60 kDa SS-A/Ro ribonucleoprotein (60 kDa Ro protein) (60 kDa ribonucleoprotein Ro) (RoRNP) (Ro 60 kDa autoantigen) (Sjogren syndrome antigen A2) (Sjogren syndrome type A antigen) (SS-A) (TROVE domain family member 2)                                       |
| P10265 | ERVK-10                      | Endogenous retrovirus group K member 10 Pro protein (HERV-K10 Pro protein) (HERV-K107 Pro protein) (HERV-K_5q33.3 provirus ancestral Pro protein) (EC 3.4.23.50) (Protease) (Proteinase) (PR)                                                                  |
| P10266 | ERVK-10                      | Endogenous retrovirus group K member 10 Pol protein (HERV-K10 Pol protein) (HERV-K107 Pol protein) (HERV-K_5q33.3 provirus ancestral Pol protein) [Includes: Reverse transcriptase (RT) (EC 2.7.7.49); Ribonuclease H (RNase H) (EC 3.1.26.4); Integrase (IN)] |
| P10323 | ACR ACRS                     | Acrosin (EC 3.4.21.10) [Cleaved into: Acrosin light chain; Acrosin heavy chain]                                                                                                                                                                                |
| P11309 | PIM1                         | Serine/threonine-protein kinase pim-1 (EC 2.7.11.1)                                                                                                                                                                                                            |
| P11441 | UBL4A DXS254E GDX UBL4       | Ubiquitin-like protein 4A (Ubiquitin-like                                                                                                                                                                                                                      |

|        |                              |                                                                                                                                                                                                  |
|--------|------------------------------|--------------------------------------------------------------------------------------------------------------------------------------------------------------------------------------------------|
|        |                              | protein GDX)                                                                                                                                                                                     |
| P11801 | PSKH1                        | Serine/threonine-protein kinase H1 (EC 2.7.11.1) (Protein serine kinase H1) (PSK-H1)                                                                                                             |
| P11802 | CDK4                         | Cyclin-dependent kinase 4 (EC 2.7.11.22) (Cell division protein kinase 4) (PSK-J3)                                                                                                               |
| P11940 | PABPC1 PAB1 PABP1 PABPC2     | Polyadenylate-binding protein 1 (PABP-1) (Poly(A)-binding protein 1)                                                                                                                             |
| P12018 | VPREB1 VPRED                 | Immunoglobulin iota chain (CD179 antigen-like family member A) (Protein VPreB1) (V(pre)B protein) (VpreB protein) (CD antigen CD179a)                                                            |
| P12081 | HARS HRS                     | Histidine--tRNA ligase, cytoplasmic (EC 6.1.1.21) (Histidyl-tRNA synthetase) (HisRS)                                                                                                             |
| P12544 | GZMA CTLA3 HFSP              | Granzyme A (EC 3.4.21.78) (CTL tryptase) (Cytotoxic T-lymphocyte proteinase 1) (Fragmentin-1) (Granzyme-1) (Hanukkah factor) (H factor) (HF)                                                     |
| P13569 | CFTR ABCC7                   | Cystic fibrosis transmembrane conductance regulator (CFTR) (ATP-binding cassette sub-family C member 7) (Channel conductance-controlling ATPase) (EC 3.6.3.49) (cAMP-dependent chloride channel) |
| P13639 | EEF2 EF2                     | Elongation factor 2 (EF-2)                                                                                                                                                                       |
| P13682 | ZNF35                        | Zinc finger protein 35 (Zinc finger protein HF.10)                                                                                                                                               |
| P14210 | HGF HPTA                     | Hepatocyte growth factor (Hepatopoietin-A) (Scatter factor) (SF) [Cleaved into: Hepatocyte growth factor alpha chain; Hepatocyte growth factor beta chain]                                       |
| P14678 | SNRPB COD SNRPB1             | Small nuclear ribonucleoprotein-associated proteins B and B' (snRNP-B) (Sm protein B/B') (Sm-B/B') (SmB/B')                                                                                      |
| P14866 | HNRNPL HNRPL P/OKcl.14       | Heterogeneous nuclear ribonucleoprotein L (hnRNP L)                                                                                                                                              |
| P14868 | DARS PIG40                   | Aspartate--tRNA ligase, cytoplasmic (EC 6.1.1.12) (Aspartyl-tRNA synthetase) (AspRS) (Cell proliferation-inducing gene 40 protein)                                                               |
| P15056 | BRAF BRAF1 RAFB1             | Serine/threonine-protein kinase B-raf (EC 2.7.11.1) (Proto-oncogene B-Raf) (p94) (v-Raf murine sarcoma viral oncogene homolog B1)                                                                |
| P15170 | GSPT1 ERF3A                  | Eukaryotic peptide chain release factor GTP-binding subunit ERF3A (Eukaryotic peptide chain release factor subunit 3a) (eRF3a) (G1 to S phase transition protein 1 homolog)                      |
| P15621 | ZNF44 GIOT2 KOX7 ZNF55 ZNF58 | Zinc finger protein 44 (Gonadotropin-inducible ovary transcription repressor 2) (GIOT-2) (Zinc finger protein 55) (Zinc finger protein 58) (Zinc finger protein KOX7)                            |
| P15622 | ZNF250 ZNF647                | Zinc finger protein 250 (Zinc finger protein 647)                                                                                                                                                |
| P15735 | PHKG2                        | Phosphorylase b kinase gamma catalytic chain, liver/testis isoform (PHK-gamma-                                                                                                                   |

|        |                            |                                                                                                                                                                                          |
|--------|----------------------------|------------------------------------------------------------------------------------------------------------------------------------------------------------------------------------------|
|        |                            | LT) (PHK-gamma-T) (EC 2.7.11.19) (PSK-C3) (Phosphorylase kinase subunit gamma-2)                                                                                                         |
| P15814 | IGLL1 IGL1                 | Immunoglobulin lambda-like polypeptide 1 (CD179 antigen-like family member B) (Ig lambda-5) (Immunoglobulin omega polypeptide) (Immunoglobulin-related protein 14.1) (CD antigen CD179b) |
| P15880 | RPS2 RPS4                  | 40S ribosomal protein S2 (40S ribosomal protein S4) (Protein LLRep3)                                                                                                                     |
| P16157 | ANK1 ANK                   | Ankyrin-1 (ANK-1) (Ankyrin-R) (Erythrocyte ankyrin)                                                                                                                                      |
| P16415 | ZNF823 ZFP36               | Zinc finger protein 823 (Zinc finger protein ZFP-36)                                                                                                                                     |
| P16520 | GNB3                       | Guanine nucleotide-binding protein G(I)/G(S)/G(T) subunit beta-3 (Transducin beta chain 3)                                                                                               |
| P16989 | YBX3 CSDA DBPA             | Y-box-binding protein 3 (Cold shock domain-containing protein A) (DNA-binding protein A) (Single-strand DNA-binding protein NF-GMB)                                                      |
| P17010 | ZFX                        | Zinc finger X-chromosomal protein                                                                                                                                                        |
| P17014 | ZNF12 GIOT3 KOX3 ZNF325    | Zinc finger protein 12 (Gonadotropin-inducible ovary transcription repressor 3) (GIOT-3) (Zinc finger protein 325) (Zinc finger protein KOX3)                                            |
| P17017 | ZNF14 GIOT4 KOX6           | Zinc finger protein 14 (Gonadotropin-inducible ovary transcription repressor 4) (GIOT-4) (Zinc finger protein KOX6)                                                                      |
| P17019 | ZNF708 KOX8 ZNF15 ZNF15L1  | Zinc finger protein 708 (Zinc finger protein 15) (Zinc finger protein 15-like 1) (Zinc finger protein KOX8)                                                                              |
| P17020 | ZNF16 HZF1 KOX9            | Zinc finger protein 16 (Zinc finger protein KOX9)                                                                                                                                        |
| P17021 | ZNF17 KIAA1947 KOX10       | Zinc finger protein 17 (Zinc finger protein HPF3) (Zinc finger protein KOX10)                                                                                                            |
| P17023 | ZNF19 KOX12                | Zinc finger protein 19 (Zinc finger protein KOX12)                                                                                                                                       |
| P17025 | ZNF182 KOX14 ZNF21         | Zinc finger protein 182 (Zinc finger protein 21) (Zinc finger protein KOX14)                                                                                                             |
| P17027 | ZNF23 KOX16 ZNF359 ZNF612  | Zinc finger protein 23 (Zinc finger protein 359) (Zinc finger protein 612) (Zinc finger protein KOX16)                                                                                   |
| P17029 | ZKSCAN1 KOX18 ZNF139 ZNF36 | Zinc finger protein with KRAB and SCAN domains 1 (Zinc finger protein 139) (Zinc finger protein 36) (Zinc finger protein KOX18)                                                          |
| P17031 | ZNF26 KOX20                | Zinc finger protein 26 (Zinc finger protein KOX20)                                                                                                                                       |
| P17032 | ZNF37A KOX21 ZNF37         | Zinc finger protein 37A (Zinc finger protein KOX21)                                                                                                                                      |
| P17035 | ZNF28 KOX24                | Zinc finger protein 28 (Zinc finger protein KOX24)                                                                                                                                       |
| P17036 | ZNF3 KOX25                 | Zinc finger protein 3 (Zinc finger protein HF.12) (Zinc finger protein HZF3.1) (Zinc finger protein KOX25)                                                                               |
| P17038 | ZNF43 KOX27 ZNF39 ZNF39L1  | Zinc finger protein 43 (Zinc finger protein 39) (Zinc finger protein HTF6) (Zinc finger protein KOX27)                                                                                   |

|        |                                                  |                                                                                                                                                                                                                                                                                                                                                                          |
|--------|--------------------------------------------------|--------------------------------------------------------------------------------------------------------------------------------------------------------------------------------------------------------------------------------------------------------------------------------------------------------------------------------------------------------------------------|
| P17039 | ZNF30 KOX28                                      | Zinc finger protein 30 (Zinc finger protein KOX28)                                                                                                                                                                                                                                                                                                                       |
| P17040 | ZSCAN20 KOX29 ZNF31 ZNF360                       | Zinc finger and SCAN domain-containing protein 20 (Zinc finger protein 31) (Zinc finger protein 360) (Zinc finger protein KOX29)                                                                                                                                                                                                                                         |
| P17041 | ZNF32 KOX30                                      | Zinc finger protein 32 (C2H2-546) (Zinc finger protein KOX30)                                                                                                                                                                                                                                                                                                            |
| P17097 | ZNF7 KOX4                                        | Zinc finger protein 7 (Zinc finger protein HF.16) (Zinc finger protein KOX4)                                                                                                                                                                                                                                                                                             |
| P17252 | PRKCA PKCA PRKACA                                | Protein kinase C alpha type (PKC-A) (PKC-alpha) (EC 2.7.11.13)                                                                                                                                                                                                                                                                                                           |
| P17538 | CTRB1 CTRB                                       | Chymotrypsinogen B (EC 3.4.21.1) [Cleaved into: Chymotrypsin B chain A; Chymotrypsin B chain B; Chymotrypsin B chain C]                                                                                                                                                                                                                                                  |
| P17612 | PRKACA PKACA                                     | cAMP-dependent protein kinase catalytic subunit alpha (PKA C-alpha) (EC 2.7.11.11)                                                                                                                                                                                                                                                                                       |
| P17844 | DDX5 G17P1 HELR HLR1                             | Probable ATP-dependent RNA helicase DDX5 (EC 3.6.4.13) (DEAD box protein 5) (RNA helicase p68)                                                                                                                                                                                                                                                                           |
| P18135 |                                                  | Ig kappa chain V-III region HAH                                                                                                                                                                                                                                                                                                                                          |
| P18136 |                                                  | Ig kappa chain V-III region HIC                                                                                                                                                                                                                                                                                                                                          |
| P18583 | SON C21orf50 DBP5 KIAA1019 NREBP HSPC310 HSPC312 | Protein SON (Bax antagonist selected in saccharomyces 1) (BASS1) (Negative regulatory element-binding protein) (NRE-binding protein) (Protein DBP-5) (SON3)                                                                                                                                                                                                              |
| P18615 | NELFE RD RDBP                                    | Negative elongation factor E (NELF-E) (RNA-binding protein RD)                                                                                                                                                                                                                                                                                                           |
| P19338 | NCL                                              | Nucleolin (Protein C23)                                                                                                                                                                                                                                                                                                                                                  |
| P19387 | POLR2C A-152E5.7                                 | DNA-directed RNA polymerase II subunit RPB3 (RNA polymerase II subunit 3) (RNA polymerase II subunit B3) (DNA-directed RNA polymerase II 33 kDa polypeptide) (RPB33) (DNA-directed RNA polymerase II subunit C) (RPB31)                                                                                                                                                  |
| P19388 | POLR2E                                           | DNA-directed RNA polymerases I, II, and III subunit RPABC1 (RNA polymerases I, II, and III subunit ABC1) (DNA-directed RNA polymerase II 23 kDa polypeptide) (DNA-directed RNA polymerase II subunit E) (RPB5 homolog) (XAP4)                                                                                                                                            |
| P19474 | TRIM21 RNF81 RO52 SSA1                           | E3 ubiquitin-protein ligase TRIM21 (EC 6.3.2.-) (52 kDa Ro protein) (52 kDa ribonucleoprotein autoantigen Ro/SS-A) (RING finger protein 81) (Ro(SS-A)) (Sjogren syndrome type A antigen) (SS-A) (Tripartite motif-containing protein 21)                                                                                                                                 |
| P19525 | EIF2AK2 PKR PRKR                                 | Interferon-induced, double-stranded RNA-activated protein kinase (EC 2.7.11.1) (Eukaryotic translation initiation factor 2-alpha kinase 2) (eIF-2A protein kinase 2) (Interferon-inducible RNA-dependent protein kinase) (P1/eIF-2A protein kinase) (Protein kinase RNA-activated) (PKR) (Protein kinase R) (Tyrosine-protein kinase EIF2AK2) (EC 2.7.10.2) (p68 kinase) |

|        |                                   |                                                                                                                                                                                                                                                            |
|--------|-----------------------------------|------------------------------------------------------------------------------------------------------------------------------------------------------------------------------------------------------------------------------------------------------------|
| P19784 | CSNK2A2 CK2A2                     | Casein kinase II subunit alpha' (CK II alpha') (EC 2.7.11.1)                                                                                                                                                                                               |
| P19838 | NFKB1                             | Nuclear factor NF-kappa-B p105 subunit (DNA-binding factor KBF1) (EBP-1) (Nuclear factor of kappa light polypeptide gene enhancer in B-cells 1) [Cleaved into: Nuclear factor NF-kappa-B p50 subunit]                                                      |
| P20151 | KLK2                              | Kallikrein-2 (EC 3.4.21.35) (Glandular kallikrein-1) (hGK-1) (Tissue kallikrein-2)                                                                                                                                                                         |
| P20226 | TBP GTF2D1 TF2D TFIID             | TATA-box-binding protein (TATA sequence-binding protein) (TATA-binding factor) (TATA-box factor) (Transcription initiation factor TFIID TBP subunit)                                                                                                       |
| P20231 | TPSB2 TPS2                        | Tryptase beta-2 (Tryptase-2) (EC 3.4.21.59) (Tryptase II)                                                                                                                                                                                                  |
| P20585 | MSH3 DUC1 DUG                     | DNA mismatch repair protein Msh3 (hMSH3) (Divergent upstream protein) (DUP) (Mismatch repair protein 1) (MRP1)                                                                                                                                             |
| P20749 | BCL3 BCL4 D19S37                  | B-cell lymphoma 3 protein (BCL-3) (Proto-oncogene BCL3)                                                                                                                                                                                                    |
| P20794 | MAK                               | Serine/threonine-protein kinase MAK (EC 2.7.11.22) (Male germ cell-associated kinase)                                                                                                                                                                      |
| P21127 | CDK11B CDC2L1 CDK11 PITSLREA PK58 | Cyclin-dependent kinase 11B (EC 2.7.11.22) (Cell division cycle 2-like protein kinase 1) (CLK-1) (Cell division protein kinase 11B) (Galactosyltransferase-associated protein kinase p58/GTA) (PITSLRE serine/threonine-protein kinase CDC2L1) (p58 CLK-1) |
| P21128 | ENDOU                             | Poly(U)-specific endoribonuclease (EC 3.1.-.-) (Placental protein 11) (PP11) (Protein endoU) (Uridylate-specific endoribonuclease)                                                                                                                         |
| P21399 | ACO1 IREB1                        | Cytoplasmic aconitate hydratase (Aconitase) (EC 4.2.1.3) (Citrate hydrolyase) (Ferritin repressor protein) (Iron regulatory protein 1) (IRP1) (Iron-responsive element-binding protein 1) (IRE-BP 1)                                                       |
| P21439 | ABCB4 MDR3 PGY3                   | Phosphatidylcholine translocator ABCB4 (ATP-binding cassette sub-family B member 4) (Multidrug resistance protein 3) (EC 3.6.3.44) (P-glycoprotein 3)                                                                                                      |
| P21506 | ZNF10 KOX1                        | Zinc finger protein 10 (Zinc finger protein KOX1)                                                                                                                                                                                                          |
| P21810 | BGN SLRR1A                        | Biglycan (Bone/cartilage proteoglycan I) (PG-S1)                                                                                                                                                                                                           |
| P22087 | FBL FIB1 FLRN                     | rRNA 2'-O-methyltransferase fibrillarin (EC 2.1.1.-) (34 kDa nucleolar scleroderma antigen) (Histone-glutamine methyltransferase)                                                                                                                          |
| P22102 | GART PGFT PRGS                    | Trifunctional purine biosynthetic protein adenosine-3 [Includes: Phosphoribosylamine--glycine ligase (EC 6.3.4.13) (Glycinamide ribonucleotide synthetase) (GARS) (Phosphoribosylglycinamide synthetase); Phosphoribosylformylglycinamide cyclo-           |

|        |                        |                                                                                                                                                                                                                                                                                          |
|--------|------------------------|------------------------------------------------------------------------------------------------------------------------------------------------------------------------------------------------------------------------------------------------------------------------------------------|
|        |                        | ligase (EC 6.3.3.1) (AIR synthase) (AIRS) (Phosphoribosyl-aminoimidazole synthetase); Phosphoribosylglycinamide formyltransferase (EC 2.1.2.2) (5'-phosphoribosylglycinamide transformylase) (GAR transformylase) (GART)]                                                                |
| P22612 | PRKACG                 | cAMP-dependent protein kinase catalytic subunit gamma (PKA C-gamma) (EC 2.7.11.11)                                                                                                                                                                                                       |
| P22626 | HNRNPA2B1 HNRPA2B1     | Heterogeneous nuclear ribonucleoproteins A2/B1 (hnRNP A2/B1)                                                                                                                                                                                                                             |
| P22694 | PRKACB                 | cAMP-dependent protein kinase catalytic subunit beta (PKA C-beta) (EC 2.7.11.11)                                                                                                                                                                                                         |
| P22792 | CPN2 ACBP              | Carboxypeptidase N subunit 2 (Carboxypeptidase N 83 kDa chain) (Carboxypeptidase N large subunit) (Carboxypeptidase N polypeptide 2) (Carboxypeptidase N regulatory subunit)                                                                                                             |
| P23083 |                        | Ig heavy chain V-I region V35                                                                                                                                                                                                                                                            |
| P23246 | SFPQ PSF               | Splicing factor, proline- and glutamine-rich (100 kDa DNA-pairing protein) (hPOMp100) (DNA-binding p52/p100 complex, 100 kDa subunit) (Polypyrimidine tract-binding protein-associated-splicing factor) (PSF) (PTB-associated-splicing factor)                                           |
| P23381 | WARS IFI53 WRS         | Tryptophan--tRNA ligase, cytoplasmic (EC 6.1.1.2) (Interferon-induced protein 53) (IFP53) (Tryptophanyl-tRNA synthetase) (TrpRS) (hWRS) [Cleaved into: T1-TrpRS; T2-TrpRS]                                                                                                               |
| P23396 | RPS3 OK/SW-cl.26       | 40S ribosomal protein S3 (EC 4.2.99.18)                                                                                                                                                                                                                                                  |
| P23443 | RPS6KB1 STK14A         | Ribosomal protein S6 kinase beta-1 (S6K-beta-1) (S6K1) (EC 2.7.11.1) (70 kDa ribosomal protein S6 kinase 1) (P70S6K1) (p70-S6K 1) (Ribosomal protein S6 kinase I) (Serine/threonine-protein kinase 14A) (p70 ribosomal S6 kinase alpha) (p70 S6 kinase alpha) (p70 S6K-alpha) (p70 S6KA) |
| P23515 | OMG OMGP               | Oligodendrocyte-myelin glycoprotein                                                                                                                                                                                                                                                      |
| P23588 | EIF4B                  | Eukaryotic translation initiation factor 4B (eIF-4B)                                                                                                                                                                                                                                     |
| P24723 | PRKCH PKCL PRKCL       | Protein kinase C eta type (EC 2.7.11.13) (PKC-L) (nPKC-eta)                                                                                                                                                                                                                              |
| P24863 | CCNC                   | Cyclin-C (SRB11 homolog) (hSRB11)                                                                                                                                                                                                                                                        |
| P24928 | POLR2A POLR2           | DNA-directed RNA polymerase II subunit RPB1 (RNA polymerase II subunit B1) (EC 2.7.7.6) (DNA-directed RNA polymerase II subunit A) (DNA-directed RNA polymerase III largest subunit) (RNA-directed RNA polymerase II subunit RPB1) (EC 2.7.7.48)                                         |
| P24941 | CDK2 CDKN2             | Cyclin-dependent kinase 2 (EC 2.7.11.22) (Cell division protein kinase 2) (p33 protein kinase)                                                                                                                                                                                           |
| P25098 | ADRBK1 BARK BARK1 GRK2 | Beta-adrenergic receptor kinase 1 (Beta-ARK-1) (EC 2.7.11.15) (G-protein coupled receptor kinase 2)                                                                                                                                                                                      |

|        |                                |                                                                                                                                                                                                                                                              |
|--------|--------------------------------|--------------------------------------------------------------------------------------------------------------------------------------------------------------------------------------------------------------------------------------------------------------|
| P25398 | RPS12                          | 40S ribosomal protein S12                                                                                                                                                                                                                                    |
| P25490 | YY1 INO80S                     | Transcriptional repressor protein YY1 (Delta transcription factor) (INO80 complex subunit S) (NF-E1) (Yin and yang 1) (YY-1)                                                                                                                                 |
| P25963 | NFKBIA IKBA MAD3 NFKBI         | NF-kappa-B inhibitor alpha (I-kappa-B-alpha) (IkB-alpha) (IkappaBalpha) (Major histocompatibility complex enhancer-binding protein MAD3)                                                                                                                     |
| P26196 | DDX6 HLR2 RCK                  | Probable ATP-dependent RNA helicase DDX6 (EC 3.6.4.13) (ATP-dependent RNA helicase p54) (DEAD box protein 6) (Oncogene RCK)                                                                                                                                  |
| P26368 | U2AF2 U2AF65                   | Splicing factor U2AF 65 kDa subunit (U2 auxiliary factor 65 kDa subunit) (hU2AF(65)) (hU2AF65) (U2 snRNP auxiliary factor large subunit)                                                                                                                     |
| P26378 | ELAVL4 HUD PNEM                | ELAV-like protein 4 (Hu-antigen D) (HuD) (Paraneoplastic encephalomyelitis antigen HuD)                                                                                                                                                                      |
| P26599 | PTBP1 PTB                      | Polypyrimidine tract-binding protein 1 (PTB) (57 kDa RNA-binding protein PPTB-1) (Heterogeneous nuclear ribonucleoprotein I) (hnRNP I)                                                                                                                       |
| P26639 | TARS                           | Threonine--tRNA ligase, cytoplasmic (EC 6.1.1.3) (Threonyl-tRNA synthetase) (ThrRS)                                                                                                                                                                          |
| P26640 | VARS G7A VARS2                 | Valine--tRNA ligase (EC 6.1.1.9) (Protein G7a) (Valyl-tRNA synthetase) (ValRS)                                                                                                                                                                               |
| P26651 | ZFP36 G0S24 RNF162A TIS11A TTP | Tristetraprolin (TTP) (G0/G1 switch regulatory protein 24) (Growth factor-inducible nuclear protein NUP475) (Protein TIS11A) (TIS11) (Zinc finger protein 36 homolog) (Zfp-36)                                                                               |
| P26927 | MST1 D3F15S2 DNF15S2 HGFL      | Hepatocyte growth factor-like protein (Macrophage stimulatory protein) (Macrophage-stimulating protein) (MSP) [Cleaved into: Hepatocyte growth factor-like protein alpha chain; Hepatocyte growth factor-like protein beta chain]                            |
| P27144 | AK4 AK3 AK3L1                  | Adenylate kinase 4, mitochondrial (AK 4) (EC 2.7.4.10) (EC 2.7.4.6) (Adenylate kinase 3-like) (GTP:AMP phosphotransferase AK4)                                                                                                                               |
| P27361 | MAPK3 ERK1 PRKM3               | Mitogen-activated protein kinase 3 (MAP kinase 3) (MAPK 3) (EC 2.7.11.24) (ERT2) (Extracellular signal-regulated kinase 1) (ERK-1) (Insulin-stimulated MAP2 kinase) (MAP kinase isoform p44) (p44-MAPK) (Microtubule-associated protein 2 kinase) (p44-ERK1) |
| P27448 | MARK3 CTAK1 EMK2               | MAP/microtubule affinity-regulating kinase 3 (EC 2.7.11.1) (C-TAK1) (cTAK1) (Cdc25C-associated protein kinase 1) (ELKL motif kinase 2) (EMK-2) (Protein kinase STK10) (Ser/Thr protein kinase PAR-1) (Par-1a) (Serine/threonine-protein kinase p78)          |
| P27635 | RPL10 DXS648E QM               | 60S ribosomal protein L10 (Laminin                                                                                                                                                                                                                           |



|        |                               |                                                                                                                                                                                                                                              |
|--------|-------------------------------|----------------------------------------------------------------------------------------------------------------------------------------------------------------------------------------------------------------------------------------------|
|        |                               | receptor homolog) (Protein QM) (Tumor suppressor QM)                                                                                                                                                                                         |
| P27694 | RPA1 REPA1 RPA70              | Replication protein A 70 kDa DNA-binding subunit (RP-A p70) (Replication factor A protein 1) (RF-A protein 1) (Single-stranded DNA-binding protein) [Cleaved into: Replication protein A 70 kDa DNA-binding subunit, N-terminally processed] |
| P28288 | ABCD3 PMP70 PXMP1             | ATP-binding cassette sub-family D member 3 (70 kDa peroxisomal membrane protein) (PMP70)                                                                                                                                                     |
| P28482 | MAPK1 ERK2 PRKM1 PRKM2        | Mitogen-activated protein kinase 1 (MAP kinase 1) (MAPK 1) (EC 2.7.11.24) (ERT1) (Extracellular signal-regulated kinase 2) (ERK-2) (MAP kinase isoform p42) (p42-MAPK) (Mitogen-activated protein kinase 2) (MAP kinase 2) (MAPK 2)          |
| P28698 | MZF1 MZF ZNF42 ZSCAN6         | Myeloid zinc finger 1 (MZF-1) (Zinc finger and SCAN domain-containing protein 6) (Zinc finger protein 42)                                                                                                                                    |
| P29083 | GTF2E1 TF2E1                  | General transcription factor IIE subunit 1 (General transcription factor IIE 56 kDa subunit) (Transcription initiation factor IIE subunit alpha) (TFIIE-alpha)                                                                               |
| P29374 | ARID4A RBBP1 RBP1             | AT-rich interactive domain-containing protein 4A (ARID domain-containing protein 4A) (Retinoblastoma-binding protein 1) (RBBP-1)                                                                                                             |
| P29375 | KDM5A JARID1A RBBP2 RBP2      | Lysine-specific demethylase 5A (EC 1.14.11.-) (Histone demethylase JARID1A) (Jumonji/ARID domain-containing protein 1A) (Retinoblastoma-binding protein 2) (RBBP-2)                                                                          |
| P29558 | RBMS1 C2orf12 MSSP MSSP1 SCR2 | RNA-binding motif, single-stranded-interacting protein 1 (Single-stranded DNA-binding protein MSSP-1) (Suppressor of CDC2 with RNA-binding motif 2)                                                                                          |
| P29728 | OAS2                          | 2'-5'-oligoadenylate synthase 2 ((2-5')oligo(A) synthase 2) (2-5A synthase 2) (EC 2.7.7.84) (p69 OAS / p71 OAS) (p69OAS / p71OAS)                                                                                                            |
| P30050 | RPL12                         | 60S ribosomal protein L12                                                                                                                                                                                                                    |
| P30876 | POLR2B                        | DNA-directed RNA polymerase II subunit RPB2 (EC 2.7.7.6) (DNA-directed RNA polymerase II 140 kDa polypeptide) (DNA-directed RNA polymerase II subunit B) (RNA polymerase II subunit 2) (RNA polymerase II subunit B2)                        |
| P31146 | CORO1A CORO1                  | Coronin-1A (Coronin-like protein A) (Clipin-A) (Coronin-like protein p57) (Tryptophan aspartate-containing coat protein) (TACO)                                                                                                              |
| P31483 | TIA1                          | Nucleolysin TIA-1 isoform p40 (RNA-binding protein TIA-1) (T-cell-restricted intracellular antigen-1) (TIA-1) (p40-TIA-1)                                                                                                                    |
| P31629 | HIVEP2                        | Transcription factor HIVEP2 (Human immunodeficiency virus type I enhancer-                                                                                                                                                                   |

|        |                                           |                                                                                                                                                                                                        |
|--------|-------------------------------------------|--------------------------------------------------------------------------------------------------------------------------------------------------------------------------------------------------------|
|        |                                           | binding protein 2) (HIV-EP2) (MHC-binding protein 2) (MBP-2)                                                                                                                                           |
| P31749 | AKT1 PKB RAC                              | RAC-alpha serine/threonine-protein kinase (EC 2.7.11.1) (Protein kinase B) (PKB) (Protein kinase B alpha) (PKB alpha) (Proto-oncogene c-Akt) (RAC-PK-alpha)                                            |
| P31751 | AKT2                                      | RAC-beta serine/threonine-protein kinase (EC 2.7.11.1) (Protein kinase Akt-2) (Protein kinase B beta) (PKB beta) (RAC-PK-beta)                                                                         |
| P31941 | APOBEC3A                                  | DNA dC->dU-editing enzyme APOBEC-3A (A3A) (EC 3.5.4.-) (Phorbolin-1)                                                                                                                                   |
| P31942 | HNRNPH3 HNRPH3                            | Heterogeneous nuclear ribonucleoprotein H3 (hnRNP H3) (Heterogeneous nuclear ribonucleoprotein 2H9) (hnRNP 2H9)                                                                                        |
| P31943 | HNRNPH1 HNRPH HNRPH1                      | Heterogeneous nuclear ribonucleoprotein H (hnRNP H) [Cleaved into: Heterogeneous nuclear ribonucleoprotein H, N-terminally processed]                                                                  |
| P32298 | GRK4 GPRK2L GPRK4                         | G protein-coupled receptor kinase 4 (EC 2.7.11.16) (G protein-coupled receptor kinase GRK4) (ITI1)                                                                                                     |
| P32969 | RPL9 OK/SW-cl.103; RPL9P7; RPL9P8; RPL9P9 | 60S ribosomal protein L9                                                                                                                                                                               |
| P33240 | CSTF2                                     | Cleavage stimulation factor subunit 2 (CF-1 64 kDa subunit) (Cleavage stimulation factor 64 kDa subunit) (CSTF 64 kDa subunit) (CstF-64)                                                               |
| P33527 | ABCC1 MRP MRP1                            | Multidrug resistance-associated protein 1 (ATP-binding cassette sub-family C member 1) (Leukotriene C(4) transporter) (LTC4 transporter)                                                               |
| P34947 | GRK5 GPRK5                                | G protein-coupled receptor kinase 5 (EC 2.7.11.16) (G protein-coupled receptor kinase GRK5)                                                                                                            |
| P35030 | PRSS3 PRSS4 TRY3 TRY4                     | Trypsin-3 (EC 3.4.21.4) (Brain trypsinogen) (Mesotrypsinogen) (Serine protease 3) (Serine protease 4) (Trypsin III) (Trypsin IV)                                                                       |
| P35269 | GTF2F1 RAP74                              | General transcription factor IIF subunit 1 (General transcription factor IIF 74 kDa subunit) (Transcription initiation factor IIF subunit alpha) (TFIIF-alpha) (Transcription initiation factor RAP74) |
| P35544 | FAU                                       | Ubiquitin-like protein FUBI                                                                                                                                                                            |
| P35606 | COPB2                                     | Coatomer subunit beta' (Beta'-coat protein) (Beta'-COP) (p102)                                                                                                                                         |
| P35626 | ADRBK2 BARK2 GRK3                         | Beta-adrenergic receptor kinase 2 (Beta-ARK-2) (EC 2.7.11.15) (G-protein-coupled receptor kinase 3)                                                                                                    |
| P35637 | FUS TLS                                   | RNA-binding protein FUS (75 kDa DNA-pairing protein) (Oncogene FUS) (Oncogene TLS) (POMp75) (Translocated in liposarcoma protein)                                                                      |
| P35789 | ZNF93 ZNF505                              | Zinc finger protein 93 (Zinc finger protein 505) (Zinc finger protein HTF34)                                                                                                                           |
| P35858 | IGFALS ALS                                | Insulin-like growth factor-binding protein complex acid labile subunit (ALS)                                                                                                                           |
| P36507 | MAP2K2 MEK2 MKK2 PRKMK2                   | Dual specificity mitogen-activated protein                                                                                                                                                             |

|        |                                   |                                                                                                                                                                                                                                                                                                                                                                                                              |
|--------|-----------------------------------|--------------------------------------------------------------------------------------------------------------------------------------------------------------------------------------------------------------------------------------------------------------------------------------------------------------------------------------------------------------------------------------------------------------|
|        |                                   | kinase kinase 2 (MAP kinase kinase 2) (MAPKK 2) (EC 2.7.12.2) (ERK activator kinase 2) (MAPK/ERK kinase 2) (MEK 2)                                                                                                                                                                                                                                                                                           |
| P36508 | ZNF76 D6S229E ZNF523              | Zinc finger protein 76 (Zinc finger protein 523)                                                                                                                                                                                                                                                                                                                                                             |
| P36578 | RPL4 RPL1                         | 60S ribosomal protein L4 (60S ribosomal protein L1)                                                                                                                                                                                                                                                                                                                                                          |
| P36896 | ACVR1B ACVRLK4 ALK4               | Activin receptor type-1B (EC 2.7.11.30) (Activin receptor type IB) (ACTR-IB) (Activin receptor-like kinase 4) (ALK-4) (Serine/threonine-protein kinase receptor R2) (SKR2)                                                                                                                                                                                                                                   |
| P36954 | POLR2I                            | DNA-directed RNA polymerase II subunit RPB9 (RNA polymerase II subunit B9) (DNA-directed RNA polymerase II subunit I) (RNA polymerase II 14.5 kDa subunit) (RPB14.5)                                                                                                                                                                                                                                         |
| P37108 | SRP14                             | Signal recognition particle 14 kDa protein (SRP14) (18 kDa Alu RNA-binding protein)                                                                                                                                                                                                                                                                                                                          |
| P38159 | RBMX HNRPG RBMXPI                 | RNA-binding motif protein, X chromosome (Glycoprotein p43) (Heterogeneous nuclear ribonucleoprotein G) (hnRNP G) [Cleaved into: RNA-binding motif protein, X chromosome, N-terminally processed]                                                                                                                                                                                                             |
| P38919 | EIF4A3 DDX48 KIAA0111             | Eukaryotic initiation factor 4A-III (eIF-4A-III) (eIF4A-III) (EC 3.6.4.13) (ATP-dependent RNA helicase DDX48) (ATP-dependent RNA helicase eIF4A-3) (DEAD box protein 48) (Eukaryotic initiation factor 4A-like NUK-34) (Eukaryotic translation initiation factor 4A isoform 3) (Nuclear matrix protein 265) (NMP 265) (hNMP 265) [Cleaved into: Eukaryotic initiation factor 4A-III, N-terminally processed] |
| P39019 | RPS19                             | 40S ribosomal protein S19                                                                                                                                                                                                                                                                                                                                                                                    |
| P39023 | RPL3 OK/SW-cl.32                  | 60S ribosomal protein L3 (HIV-1 TAR RNA-binding protein B) (TARBP-B)                                                                                                                                                                                                                                                                                                                                         |
| P40197 | GP5                               | Platelet glycoprotein V (GPV) (Glycoprotein 5) (CD antigen CD42d)                                                                                                                                                                                                                                                                                                                                            |
| P40313 | CTRL CTRL1                        | Chymotrypsin-like protease CTRL-1 (EC 3.4.21.-)                                                                                                                                                                                                                                                                                                                                                              |
| P40337 | VHL                               | Von Hippel-Lindau disease tumor suppressor (Protein G7) (pVHL)                                                                                                                                                                                                                                                                                                                                               |
| P41091 | EIF2S3 EIF2G                      | Eukaryotic translation initiation factor 2 subunit 3 (Eukaryotic translation initiation factor 2 subunit gamma X) (eIF-2-gamma X) (eIF-2gX)                                                                                                                                                                                                                                                                  |
| P41182 | BCL6 BCL5 LAZ3 ZBTB27 ZNF51       | B-cell lymphoma 6 protein (BCL-6) (B-cell lymphoma 5 protein) (BCL-5) (Protein LAZ-3) (Zinc finger and BTB domain-containing protein 27) (Zinc finger protein 51)                                                                                                                                                                                                                                            |
| P41229 | KDM5C DXS1272E JARID1C SMCX XE169 | Lysine-specific demethylase 5C (EC 1.14.11.-) (Histone demethylase JARID1C) (Jumonji/ARID domain-containing protein 1C) (Protein SmcX) (Protein Xe169)                                                                                                                                                                                                                                                       |
| P41238 | APOBEC1                           | C->U-editing enzyme APOBEC-1 (EC 3.5.4.36) (Apolipoprotein B mRNA-editing                                                                                                                                                                                                                                                                                                                                    |

|        |                                                  |                                                                                                                                                                                                                                                                                                                                          |
|--------|--------------------------------------------------|------------------------------------------------------------------------------------------------------------------------------------------------------------------------------------------------------------------------------------------------------------------------------------------------------------------------------------------|
|        |                                                  | enzyme 1) (HEPR)<br>(mRNA(cytosine(6666)) deaminase 1)                                                                                                                                                                                                                                                                                   |
| P41250 | GARS                                             | Glycine--tRNA ligase (EC 6.1.1.14)<br>(Diadenosine tetraphosphate synthetase)<br>(AP-4-A synthetase) (Glycyl-tRNA<br>synthetase) (GlyRS)                                                                                                                                                                                                 |
| P41252 | IARS                                             | Isoleucine--tRNA ligase, cytoplasmic (EC<br>6.1.1.5) (Isoleucyl-tRNA synthetase) (IRS)<br>(IleRS)                                                                                                                                                                                                                                        |
| P41743 | PRKCI DXS1179E                                   | Protein kinase C iota type (EC 2.7.11.13)<br>(Atypical protein kinase C-lambda/iota)<br>(PRKC-lambda/iota) (aPKC-lambda/iota)<br>(nPKC-iota)                                                                                                                                                                                             |
| P42285 | SKIV2L2 DOB1 KIAA0052 Mtr4                       | Superkiller viralicidic activity 2-like 2 (EC<br>3.6.4.13) (ATP-dependent RNA helicase<br>DOB1) (ATP-dependent RNA helicase<br>SKIV2L2) (TRAMP-like complex helicase)                                                                                                                                                                    |
| P42696 | RBM34 KIAA0117                                   | RNA-binding protein 34 (RNA-binding<br>motif protein 34)                                                                                                                                                                                                                                                                                 |
| P42704 | LRPPRC LRP130                                    | Leucine-rich PPR motif-containing protein,<br>mitochondrial (130 kDa leucine-rich<br>protein) (LRP 130) (GP130)                                                                                                                                                                                                                          |
| P42766 | RPL35                                            | 60S ribosomal protein L35                                                                                                                                                                                                                                                                                                                |
| P43034 | PAFAH1B1 LIS1 MDCR MDS<br>PAFAHA                 | Platelet-activating factor acetylhydrolase IB<br>subunit alpha (Lissencephaly-1 protein)<br>(LIS-1) (PAF acetylhydrolase 45 kDa<br>subunit) (PAF-AH 45 kDa subunit) (PAF-<br>AH alpha) (PAFAH alpha)                                                                                                                                     |
| P43243 | MATR3 KIAA0723                                   | Matrin-3                                                                                                                                                                                                                                                                                                                                 |
| P43246 | MSH2                                             | DNA mismatch repair protein Msh2<br>(hMSH2) (MutS protein homolog 2)                                                                                                                                                                                                                                                                     |
| P43250 | GRK6 GPRK6                                       | G protein-coupled receptor kinase 6 (EC<br>2.7.11.16) (G protein-coupled receptor<br>kinase GRK6)                                                                                                                                                                                                                                        |
| P43897 | TSFM                                             | Elongation factor Ts, mitochondrial (EF-<br>Ts) (EF-TsMt)                                                                                                                                                                                                                                                                                |
| P45984 | MAPK9 JNK2 PRKM9 SAPK1A                          | Mitogen-activated protein kinase 9 (MAP<br>kinase 9) (MAPK 9) (EC 2.7.11.24) (JNK-<br>55) (Stress-activated protein kinase 1a)<br>(SAPK1a) (Stress-activated protein kinase<br>JNK2) (c-Jun N-terminal kinase 2)                                                                                                                         |
| P45985 | MAP2K4 JNKK1 MEK4 MKK4<br>PRKMK4 SEK1 SERK1 SKK1 | Dual specificity mitogen-activated protein<br>kinase kinase 4 (MAP kinase kinase 4)<br>(MAPKK 4) (EC 2.7.12.2) (JNK-activating<br>kinase 1) (MAPK/ERK kinase 4) (MEK 4)<br>(SAPK/ERK kinase 1) (SEK1) (Stress-<br>activated protein kinase kinase 1) (SAPK<br>kinase 1) (SAPKK-1) (SAPKK1) (c-Jun N-<br>terminal kinase kinase 1) (JNKK) |
| P46063 | RECQL RECQ1 RECQL1                               | ATP-dependent DNA helicase Q1 (EC<br>3.6.4.12) (DNA helicase, RecQ-like type 1)<br>(RecQ1) (DNA-dependent ATPase Q1)<br>(RecQ protein-like 1)                                                                                                                                                                                            |
| P46199 | MTIF2                                            | Translation initiation factor IF-2,<br>mitochondrial (IF-2(Mt)) (IF-2Mt)<br>(IF2(mt))                                                                                                                                                                                                                                                    |
| P46531 | NOTCH1 TAN1                                      | Neurogenic locus notch homolog protein 1<br>(Notch 1) (hN1) (Translocation-associated<br>notch protein TAN-1) [Cleaved into: Notch                                                                                                                                                                                                       |

|        |                                  |                                                                                                                                                                                                                                                                                                                                                                                                                                                            |
|--------|----------------------------------|------------------------------------------------------------------------------------------------------------------------------------------------------------------------------------------------------------------------------------------------------------------------------------------------------------------------------------------------------------------------------------------------------------------------------------------------------------|
|        |                                  | 1 extracellular truncation (NEXT); Notch 1 intracellular domain (NICD)]                                                                                                                                                                                                                                                                                                                                                                                    |
| P46734 | MAP2K3 MEK3 MKK3 PRKMK3 SKK2     | Dual specificity mitogen-activated protein kinase kinase 3 (MAP kinase kinase 3) (MAPKK 3) (EC 2.7.12.2) (MAPK/ERK kinase 3) (MEK 3) (Stress-activated protein kinase kinase 2) (SAPK kinase 2) (SAPKK-2) (SAPKK2)                                                                                                                                                                                                                                         |
| P46777 | RPL5 MSTP030                     | 60S ribosomal protein L5                                                                                                                                                                                                                                                                                                                                                                                                                                   |
| P46781 | RPS9                             | 40S ribosomal protein S9                                                                                                                                                                                                                                                                                                                                                                                                                                   |
| P46782 | RPS5                             | 40S ribosomal protein S5 [Cleaved into: 40S ribosomal protein S5, N-terminally processed]                                                                                                                                                                                                                                                                                                                                                                  |
| P46783 | RPS10                            | 40S ribosomal protein S10                                                                                                                                                                                                                                                                                                                                                                                                                                  |
| P47897 | QARS                             | Glutamine--tRNA ligase (EC 6.1.1.18) (Glutamyl-tRNA synthetase) (GlnRS)                                                                                                                                                                                                                                                                                                                                                                                    |
| P47974 | ZFP36L2 BRF2 ERF2 RNF162C TIS11D | Zinc finger protein 36, C3H1 type-like 2 (ZFP36-like 2) (Butyrate response factor 2) (EGF-response factor 2) (ERF-2) (Protein TIS11D)                                                                                                                                                                                                                                                                                                                      |
| P48200 | IREB2                            | Iron-responsive element-binding protein 2 (IRE-BP 2) (Iron regulatory protein 2) (IRP2)                                                                                                                                                                                                                                                                                                                                                                    |
| P48740 | MASP1 CRARF CRARF1 PRSS5         | Mannan-binding lectin serine protease 1 (EC 3.4.21.-) (Complement factor MASP-3) (Complement-activating component of Ra-reactive factor) (Mannose-binding lectin-associated serine protease 1) (MASP-1) (Mannose-binding protein-associated serine protease) (Ra-reactive factor serine protease p100) (RaRF) (Serine protease 5) [Cleaved into: Mannan-binding lectin serine protease 1 heavy chain; Mannan-binding lectin serine protease 1 light chain] |
| P49207 | RPL34                            | 60S ribosomal protein L34                                                                                                                                                                                                                                                                                                                                                                                                                                  |
| P49336 | CDK8                             | Cyclin-dependent kinase 8 (EC 2.7.11.22) (EC 2.7.11.23) (Cell division protein kinase 8) (Mediator complex subunit CDK8) (Mediator of RNA polymerase II transcription subunit CDK8) (Protein kinase K35)                                                                                                                                                                                                                                                   |
| P49406 | MRPL19 KIAA0104 MRPL15           | 39S ribosomal protein L19, mitochondrial (L19mt) (MRP-L19) (39S ribosomal protein L15, mitochondrial) (L15mt) (MRP-L15)                                                                                                                                                                                                                                                                                                                                    |
| P49411 | TUFM                             | Elongation factor Tu, mitochondrial (EF-Tu) (P43)                                                                                                                                                                                                                                                                                                                                                                                                          |
| P49458 | SRP9                             | Signal recognition particle 9 kDa protein (SRP9)                                                                                                                                                                                                                                                                                                                                                                                                           |
| P49588 | AARS                             | Alanine--tRNA ligase, cytoplasmic (EC 6.1.1.7) (Alanyl-tRNA synthetase) (AlaRS) (Renal carcinoma antigen NY-REN-42)                                                                                                                                                                                                                                                                                                                                        |
| P49589 | CARS                             | Cysteine--tRNA ligase, cytoplasmic (EC 6.1.1.16) (Cysteinyl-tRNA synthetase) (CysRS)                                                                                                                                                                                                                                                                                                                                                                       |
| P49590 | HARS2 HARSL HARSR HO3            | Probable histidine--tRNA ligase, mitochondrial (EC 6.1.1.21) (Histidine--tRNA ligase-like) (Histidyl-tRNA                                                                                                                                                                                                                                                                                                                                                  |

|        |                               |                                                                                                                                                                                                                                                     |
|--------|-------------------------------|-----------------------------------------------------------------------------------------------------------------------------------------------------------------------------------------------------------------------------------------------------|
|        |                               | synthetase) (HisRS)                                                                                                                                                                                                                                 |
| P49591 | SARS SERS                     | Serine--tRNA ligase, cytoplasmic (EC 6.1.1.11) (Seryl-tRNA synthetase) (SerRS) (Seryl-tRNA(Ser/Sec) synthetase)                                                                                                                                     |
| P49642 | PRIM1                         | DNA primase small subunit (EC 2.7.7.-) (DNA primase 49 kDa subunit) (p49)                                                                                                                                                                           |
| P49643 | PRIM2 PRIM2A                  | DNA primase large subunit (EC 2.7.7.-) (DNA primase 58 kDa subunit) (p58)                                                                                                                                                                           |
| P49770 | EIF2B2 EIF2BB                 | Translation initiation factor eIF-2B subunit beta (S20I15) (S20III15) (eIF-2B GDP-GTP exchange factor subunit beta)                                                                                                                                 |
| P49773 | HINT1 HINT PKCI1 PRKCNH1      | Histidine triad nucleotide-binding protein 1 (EC 3.-.-.-) (Adenosine 5'-monophosphoramidase) (Protein kinase C inhibitor 1) (Protein kinase C-interacting protein 1) (PKCI-1)                                                                       |
| P49840 | GSK3A                         | Glycogen synthase kinase-3 alpha (GSK-3 alpha) (EC 2.7.11.26) (Serine/threonine-protein kinase GSK3A) (EC 2.7.11.1)                                                                                                                                 |
| P49841 | GSK3B                         | Glycogen synthase kinase-3 beta (GSK-3 beta) (EC 2.7.11.26) (Serine/threonine-protein kinase GSK3B) (EC 2.7.11.1)                                                                                                                                   |
| P49862 | KLK7 PRSS6 SCCE               | Kallikrein-7 (hK7) (EC 3.4.21.117) (Serine protease 6) (Stratum corneum chymotryptic enzyme) (hSCCE)                                                                                                                                                |
| P49863 | GZMK TRYP2                    | Granzyme K (EC 3.4.21.-) (Fragmentin-3) (Granzyme-3) (NK-tryptase-2) (NK-Tryp-2)                                                                                                                                                                    |
| P49910 | ZNF165 ZPF165 ZSCAN7          | Zinc finger protein 165 (Cancer/testis antigen 53) (CT53) (LD65) (Zinc finger and SCAN domain-containing protein 7)                                                                                                                                 |
| P50150 | GNG4 GNGT4                    | Guanine nucleotide-binding protein G(I)/G(S)/G(O) subunit gamma-4                                                                                                                                                                                   |
| P50151 | GNG10 GNGT10                  | Guanine nucleotide-binding protein G(I)/G(S)/G(O) subunit gamma-10                                                                                                                                                                                  |
| P50613 | CDK7 CAK CAK1 CDKN7 MO15 STK1 | Cyclin-dependent kinase 7 (EC 2.7.11.22) (EC 2.7.11.23) (39 kDa protein kinase) (p39 Mo15) (CDK-activating kinase 1) (Cell division protein kinase 7) (Serine/threonine-protein kinase 1) (TFIIH basal transcription factor complex kinase subunit) |
| P50750 | CDK9 CDC2L4 TAK               | Cyclin-dependent kinase 9 (EC 2.7.11.22) (EC 2.7.11.23) (C-2K) (Cell division cycle 2-like protein kinase 4) (Cell division protein kinase 9) (Serine/threonine-protein kinase PITALRE) (Tat-associated kinase complex catalytic subunit)           |
| P50851 | LRBA BGL CDC4L LBA            | Lipopolysaccharide-responsive and beige-like anchor protein (Beige-like protein) (CDC4-like protein)                                                                                                                                                |
| P50914 | RPL14                         | 60S ribosomal protein L14 (CAG-ISL 7)                                                                                                                                                                                                               |
| P51003 | PAPOLA PAP                    | Poly(A) polymerase alpha (PAP-alpha) (EC 2.7.7.19) (Polynucleotide adenylyltransferase alpha)                                                                                                                                                       |
| P51114 | FXR1                          | Fragile X mental retardation syndrome-related protein 1 (hFXR1p)                                                                                                                                                                                    |
| P51116 | FXR2 FMR1L2                   | Fragile X mental retardation syndrome-related protein 2                                                                                                                                                                                             |

|        |                              |                                                                                                                                                                                                                                                                                                                                    |
|--------|------------------------------|------------------------------------------------------------------------------------------------------------------------------------------------------------------------------------------------------------------------------------------------------------------------------------------------------------------------------------|
| P51124 | GZMM MET1                    | Granzyme M (EC 3.4.21.-) (Met-1 serine protease) (Hu-Met-1) (Met-ase) (Natural killer cell granular protease)                                                                                                                                                                                                                      |
| P51398 | DAP3 MRPS29                  | 28S ribosomal protein S29, mitochondrial (MRP-S29) (S29mt) (Death-associated protein 3) (DAP-3) (Ionizing radiation resistance conferring protein)                                                                                                                                                                                 |
| P51508 | ZNF81                        | Zinc finger protein 81 (HFZ20)                                                                                                                                                                                                                                                                                                     |
| P51513 | NOVA1                        | RNA-binding protein Nova-1 (Neuro-oncological ventral antigen 1) (Onconeural ventral antigen 1) (Paraneoplastic Ri antigen) (Ventral neuron-specific protein 1)                                                                                                                                                                    |
| P51522 | ZNF83 ZNF816B                | Zinc finger protein 83 (Zinc finger protein 816B) (Zinc finger protein HPF1)                                                                                                                                                                                                                                                       |
| P51523 | ZNF84                        | Zinc finger protein 84 (Zinc finger protein HPF2)                                                                                                                                                                                                                                                                                  |
| P51786 | ZNF157                       | Zinc finger protein 157 (Zinc finger protein HZF22)                                                                                                                                                                                                                                                                                |
| P51812 | RPS6KA3 ISPK1 MAPKAPK1B RSK2 | Ribosomal protein S6 kinase alpha-3 (S6K-alpha-3) (EC 2.7.11.1) (90 kDa ribosomal protein S6 kinase 3) (p90-RSK 3) (p90RSK3) (Insulin-stimulated protein kinase 1) (ISPK-1) (MAP kinase-activated protein kinase 1b) (MAPK-activated protein kinase 1b) (MAPKAP kinase 1b) (MAPKAPK-1b) (Ribosomal S6 kinase 2) (RSK-2) (pp90RSK2) |
| P51814 | ZNF41                        | Zinc finger protein 41                                                                                                                                                                                                                                                                                                             |
| P51817 | PRKX PKX1                    | cAMP-dependent protein kinase catalytic subunit PRKX (PrKX) (Protein kinase X) (Protein kinase X-linked) (Serine/threonine-protein kinase PRKX) (EC 2.7.11.1) (Protein kinase PKX1)                                                                                                                                                |
| P51884 | LUM LDC SLRR2D               | Lumican (Keratan sulfate proteoglycan lumican) (KSPG lumican)                                                                                                                                                                                                                                                                      |
| P51888 | PRELP SLRR2A                 | Prolargin (Proline-arginine-rich end leucine-rich repeat protein)                                                                                                                                                                                                                                                                  |
| P51955 | NEK2 NEK2A NLK1              | Serine/threonine-protein kinase Nek2 (EC 2.7.11.1) (HSPK 21) (Never in mitosis A-related kinase 2) (NimA-related protein kinase 2) (NimA-like protein kinase 1)                                                                                                                                                                    |
| P51956 | NEK3                         | Serine/threonine-protein kinase Nek3 (EC 2.7.11.1) (HSPK 36) (Never in mitosis A-related kinase 3) (NimA-related protein kinase 3)                                                                                                                                                                                                 |
| P51957 | NEK4 STK2                    | Serine/threonine-protein kinase Nek4 (EC 2.7.11.1) (Never in mitosis A-related kinase 4) (NimA-related protein kinase 4) (Serine/threonine-protein kinase 2) (Serine/threonine-protein kinase NRK2)                                                                                                                                |
| P51991 | HNRNPA3 HNRPA3               | Heterogeneous nuclear ribonucleoprotein A3 (hnRNP A3)                                                                                                                                                                                                                                                                              |
| P52272 | HNRNPM HNRPM NAGR1           | Heterogeneous nuclear ribonucleoprotein M (hnRNP M)                                                                                                                                                                                                                                                                                |
| P52298 | NCBP2 CBP20 PIG55            | Nuclear cap-binding protein subunit 2 (20 kDa nuclear cap-binding protein) (Cell proliferation-inducing gene 55 protein) (NCBP 20 kDa subunit) (CBP20) (NCBP-interacting protein 1) (NIP1)                                                                                                                                         |

|        |                              |                                                                                                                                                                                                                                                       |
|--------|------------------------------|-------------------------------------------------------------------------------------------------------------------------------------------------------------------------------------------------------------------------------------------------------|
| P52434 | POLR2H                       | DNA-directed RNA polymerases I, II, and III subunit RPABC3 (RNA polymerases I, II, and III subunit ABC3) (DNA-directed RNA polymerase II subunit H) (DNA-directed RNA polymerases I, II, and III 17.1 kDa polypeptide) (RPB17) (RPB8 homolog) (hRPB8) |
| P52435 | POLR2J POLR2J1               | DNA-directed RNA polymerase II subunit RPB11-a (RNA polymerase II subunit B11-a) (RPB11a) (DNA-directed RNA polymerase II subunit J-1) (RNA polymerase II 13.3 kDa subunit)                                                                           |
| P52564 | MAP2K6 MEK6 MKK6 PRKMK6 SKK3 | Dual specificity mitogen-activated protein kinase kinase 6 (MAP kinase kinase 6) (MAPKK 6) (EC 2.7.12.2) (MAPK/ERK kinase 6) (MEK 6) (Stress-activated protein kinase kinase 3) (SAPK kinase 3) (SAPKK-3) (SAPKK3)                                    |
| P52597 | HNRNPF HNRPF                 | Heterogeneous nuclear ribonucleoprotein F (hnRNP F) (Nucleolin-like protein mcs94-1) [Cleaved into: Heterogeneous nuclear ribonucleoprotein F, N-terminally processed]                                                                                |
| P52657 | GTF2A2 TF2A2                 | Transcription initiation factor IIA subunit 2 (General transcription factor IIA subunit 2) (TFIIA p12 subunit) (TFIIA-12) (TFIIAS) (Transcription initiation factor IIA gamma chain) (TFIIA-gamma)                                                    |
| P52701 | MSH6 GTBP                    | DNA mismatch repair protein Msh6 (hMSH6) (G/T mismatch-binding protein) (GTBP) (GTMBP) (MutS-alpha 160 kDa subunit) (p160)                                                                                                                            |
| P52736 | ZNF133 ZNF150                | Zinc finger protein 133 (Zinc finger protein 150)                                                                                                                                                                                                     |
| P52737 | ZNF136                       | Zinc finger protein 136                                                                                                                                                                                                                               |
| P52738 | ZNF140                       | Zinc finger protein 140                                                                                                                                                                                                                               |
| P52740 | ZNF132                       | Zinc finger protein 132                                                                                                                                                                                                                               |
| P52741 | ZNF134                       | Zinc finger protein 134                                                                                                                                                                                                                               |
| P52742 | ZNF135 ZNF61 ZNF78L1         | Zinc finger protein 135 (Zinc finger protein 61) (Zinc finger protein 78-like 1)                                                                                                                                                                      |
| P52747 | ZNF143 SBF STAF              | Zinc finger protein 143 (SPH-binding factor) (Selenocysteine tRNA gene transcription-activating factor) (hStaf)                                                                                                                                       |
| P52756 | RBM5 H37 LUCA15              | RNA-binding protein 5 (Protein G15) (Putative tumor suppressor LUCA15) (RNA-binding motif protein 5) (Renal carcinoma antigen NY-REN-9)                                                                                                               |
| P52758 | HRSP12 PSP                   | Ribonuclease UK114 (EC 3.1.-.-) (14.5 kDa translational inhibitor protein) (p14.5) (Heat-responsive protein 12) (UK114 antigen homolog)                                                                                                               |
| P52815 | MRPL12 RPML12                | 39S ribosomal protein L12, mitochondrial (L12mt) (MRP-L12) (5c5-2)                                                                                                                                                                                    |
| P53350 | PLK1 PLK                     | Serine/threonine-protein kinase PLK1 (EC 2.7.11.21) (Polo-like kinase 1) (PLK-1) (Serine/threonine-protein kinase 13) (STPK13)                                                                                                                        |
| P53355 | DAPK1 DAPK                   | Death-associated protein kinase 1 (DAP                                                                                                                                                                                                                |



|        |                               |                                                                                                                                                                                                                                         |
|--------|-------------------------------|-----------------------------------------------------------------------------------------------------------------------------------------------------------------------------------------------------------------------------------------|
|        |                               | kinase 1) (EC 2.7.11.1)                                                                                                                                                                                                                 |
| P53582 | METAP1 KIAA0094               | Methionine aminopeptidase 1 (MAP 1) (MetAP 1) (EC 3.4.11.18) (Peptidase M 1)                                                                                                                                                            |
| P53621 | COPA                          | Coatomer subunit alpha (Alpha-coat protein) (Alpha-COP) (HEP-COP) (HEPCOP) [Cleaved into: Xenin (Xenopsin-related peptide); Proxenin]                                                                                                   |
| P53778 | MAPK12 ERK6 SAPK3             | Mitogen-activated protein kinase 12 (MAP kinase 12) (MAPK 12) (EC 2.7.11.24) (Extracellular signal-regulated kinase 6) (ERK-6) (Mitogen-activated protein kinase p38 gamma) (MAP kinase p38 gamma) (Stress-activated protein kinase 3)  |
| P53803 | POLR2K                        | DNA-directed RNA polymerases I, II, and III subunit RPABC4 (RNA polymerases I, II, and III subunit ABC4) (ABC10-alpha) (DNA-directed RNA polymerase II subunit K) (RNA polymerase II 7.0 kDa subunit) (RPB7.0) (RPB10alpha)             |
| P54132 | BLM RECQ2 RECQL3              | Bloom syndrome protein (EC 3.6.4.12) (DNA helicase, RecQ-like type 2) (RecQ2) (RecQ protein-like 3)                                                                                                                                     |
| P54136 | RARS                          | Arginine--tRNA ligase, cytoplasmic (EC 6.1.1.19) (Arginyl-tRNA synthetase) (ArgRS)                                                                                                                                                      |
| P54198 | HIRA DGCR1 HIR TUPLE1         | Protein HIRA (TUP1-like enhancer of split protein 1)                                                                                                                                                                                    |
| P54253 | ATXN1 ATX1 SCA1               | Ataxin-1 (Spinocerebellar ataxia type 1 protein)                                                                                                                                                                                        |
| P54577 | YARS                          | Tyrosine--tRNA ligase, cytoplasmic (EC 6.1.1.1) (Tyrosyl-tRNA synthetase) (TyrRS) [Cleaved into: Tyrosine--tRNA ligase, cytoplasmic, N-terminally processed]                                                                            |
| P54646 | PRKAA2 AMPK AMPK2             | 5'-AMP-activated protein kinase catalytic subunit alpha-2 (AMPK subunit alpha-2) (EC 2.7.11.1) (Acetyl-CoA carboxylase kinase) (ACACA kinase) (EC 2.7.11.27) (Hydroxymethylglutaryl-CoA reductase kinase) (HMGCR kinase) (EC 2.7.11.31) |
| P54819 | AK2 ADK2                      | Adenylate kinase 2, mitochondrial (AK 2) (EC 2.7.4.3) (ATP-AMP transphosphorylase 2) (ATP:AMP phosphotransferase) (Adenylate monophosphate kinase) [Cleaved into: Adenylate kinase 2, mitochondrial, N-terminally processed]            |
| P55081 | MFAP1                         | Microfibrillar-associated protein 1                                                                                                                                                                                                     |
| P55199 | ELL C19orf17                  | RNA polymerase II elongation factor ELL (Eleven-nineteen lysine-rich leukemia protein)                                                                                                                                                  |
| P55265 | ADAR ADAR1 DSRAD G1P1 IFI4    | Double-stranded RNA-specific adenosine deaminase (DRADA) (EC 3.5.4.37) (136 kDa double-stranded RNA-binding protein) (p136) (Interferon-inducible protein 4) (IFI-4) (K88DSRBP)                                                         |
| P55735 | SEC13 D3S1231E SEC13L1 SEC13R | Protein SEC13 homolog (SEC13-like protein 1) (SEC13-related protein)                                                                                                                                                                    |

|        |                                     |                                                                                                                                                                                                               |
|--------|-------------------------------------|---------------------------------------------------------------------------------------------------------------------------------------------------------------------------------------------------------------|
| P55769 | NHP2L1                              | NHP2-like protein 1 (High mobility group-like nuclear protein 2 homolog 1) (OTK27) (SNU13 homolog) (hSNU13) (U4/U6.U5 tri-snRNP 15.5 kDa protein) [Cleaved into: NHP2-like protein 1, N-terminally processed] |
| P55795 | HNRNPH2 FTP3 HNRPH2                 | Heterogeneous nuclear ribonucleoprotein H2 (hnRNP H2) (FTP-3) (Heterogeneous nuclear ribonucleoprotein H') (hnRNP H') [Cleaved into: Heterogeneous nuclear ribonucleoprotein H2, N-terminally processed]      |
| P55884 | EIF3B EIF3S9                        | Eukaryotic translation initiation factor 3 subunit B (eIF3b) (Eukaryotic translation initiation factor 3 subunit 9) (Prt1 homolog) (hPrt1) (eIF-3-eta) (eIF3 p110) (eIF3 p116)                                |
| P56182 | RRP1 D21S2056E NNP1 NOP52 RRP1A     | Ribosomal RNA processing protein 1 homolog A (Novel nuclear protein 1) (NNP-1) (Nucleolar protein Nop52) (RRP1-like protein)                                                                                  |
| P56192 | MARS                                | Methionine--tRNA ligase, cytoplasmic (EC 6.1.1.10) (Methionyl-tRNA synthetase) (MetRS)                                                                                                                        |
| P56537 | EIF6 EIF3A ITGB4BP OK/SW-cl.27      | Eukaryotic translation initiation factor 6 (eIF-6) (B(2)GCN homolog) (B4 integrin interactor) (CAB) (p27(BBP))                                                                                                |
| P56730 | PRSS12                              | Neurotrypsin (EC 3.4.21.-) (Leydin) (Motopsin) (Serine protease 12)                                                                                                                                           |
| P57052 | RBM11                               | Splicing regulator RBM11 (RNA-binding motif protein 11)                                                                                                                                                       |
| P57058 | HUNK MAKV                           | Hormonally up-regulated neu tumor-associated kinase (EC 2.7.11.1) (B19) (Serine/threonine-protein kinase MAK-V)                                                                                               |
| P57059 | SIK1 SIK SNF1LK                     | Serine/threonine-protein kinase SIK1 (EC 2.7.11.1) (Salt-inducible kinase 1) (SIK-1) (Serine/threonine-protein kinase SNF1-like kinase 1) (Serine/threonine-protein kinase SNF1LK)                            |
| P57071 | PRDM15 C21orf83 ZNF298              | PR domain zinc finger protein 15 (EC 2.1.1.-) (PR domain-containing protein 15) (Zinc finger protein 298)                                                                                                     |
| P57078 | RIPK4 ANKRD3 DIK                    | Receptor-interacting serine/threonine-protein kinase 4 (EC 2.7.11.1) (Ankyrin repeat domain-containing protein 3) (PKC-delta-interacting protein kinase)                                                      |
| P57721 | PCBP3                               | Poly(rC)-binding protein 3 (Alpha-CP3)                                                                                                                                                                        |
| P57723 | PCBP4                               | Poly(rC)-binding protein 4 (Alpha-CP4)                                                                                                                                                                        |
| P57727 | TMPRSS3 ECHOS1 TADG12 UNQ323/PRO382 | Transmembrane protease serine 3 (EC 3.4.21.-) (Serine protease TADG-12) (Tumor-associated differentially-expressed gene 12 protein)                                                                           |
| P57737 | CORO7                               | Coronin-7 (Crm7) (70 kDa WD repeat tumor rejection antigen homolog)                                                                                                                                           |
| P57772 | EEFSEC SELB                         | Selenocysteine-specific elongation factor (Elongation factor sec) (Eukaryotic elongation factor, selenocysteine-tRNA-specific)                                                                                |
| P57775 | FBXW4 FBW4 SHFM3                    | F-box/WD repeat-containing protein 4 (Dactylin) (F-box and WD-40 domain-                                                                                                                                      |

|        |                                             |                                                                                                                                                                                                                                                                     |
|--------|---------------------------------------------|---------------------------------------------------------------------------------------------------------------------------------------------------------------------------------------------------------------------------------------------------------------------|
|        |                                             | containing protein 4)                                                                                                                                                                                                                                               |
| P58317 | ZNF121 ZNF20                                | Zinc finger protein 121 (Zinc finger protein 20)                                                                                                                                                                                                                    |
| P58546 | MTPN                                        | Myotrophin (Protein V-1)                                                                                                                                                                                                                                            |
| P59768 | GNG2                                        | Guanine nucleotide-binding protein G(I)/G(S)/G(O) subunit gamma-2 (G gamma-I)                                                                                                                                                                                       |
| P60321 | NANOS2 NOS2                                 | Nanos homolog 2 (NOS-2)                                                                                                                                                                                                                                             |
| P60323 | NANOS3 NOS3                                 | Nanos homolog 3 (NOS-3)                                                                                                                                                                                                                                             |
| P60842 | EIF4A1 DDX2A EIF4A                          | Eukaryotic initiation factor 4A-I (eIF-4A-I) (eIF4A-I) (EC 3.6.4.13) (ATP-dependent RNA helicase eIF4A-1)                                                                                                                                                           |
| P60866 | RPS20                                       | 40S ribosomal protein S20                                                                                                                                                                                                                                           |
| P60896 | SHFM1 DSS1 SHFDG1                           | 26S proteasome complex subunit DSS1 (Deleted in split hand/split foot protein 1) (Split hand/foot deleted protein 1) (Split hand/foot malformation type 1 protein)                                                                                                  |
| P61011 | SRP54                                       | Signal recognition particle 54 kDa protein (SRP54)                                                                                                                                                                                                                  |
| P61218 | POLR2F POLRF                                | DNA-directed RNA polymerases I, II, and III subunit RPABC2 (RNA polymerases I, II, and III subunit ABC2) (DNA-directed RNA polymerase II subunit F) (DNA-directed RNA polymerases I, II, and III 14.4 kDa polypeptide) (RPABC14.4) (RPB14.4) (RPB6 homolog) (RPC15) |
| P61221 | ABCE1 RLI RNASEL1 RNASELI RNS4I OK/SW-cl.40 | ATP-binding cassette sub-family E member 1 (2'-5'-oligoadenylate-binding protein) (HuHP68) (RNase L inhibitor) (Ribonuclease 4 inhibitor) (RNS4I)                                                                                                                   |
| P61254 | RPL26                                       | 60S ribosomal protein L26                                                                                                                                                                                                                                           |
| P61313 | RPL15 EC45 TCBAP0781                        | 60S ribosomal protein L15                                                                                                                                                                                                                                           |
| P61326 | MAGOH MAGOHA                                | Protein mago nashi homolog                                                                                                                                                                                                                                          |
| P61513 | RPL37A                                      | 60S ribosomal protein L37a                                                                                                                                                                                                                                          |
| P61565 | ERV-K-21                                    | Endogenous retrovirus group K member 21 Env polyprotein (EnvK1 protein) (Envelope polyprotein) (HERV-K_12q14.1 provirus ancestral Env polyprotein) [Cleaved into: Surface protein (SU); Transmembrane protein (TM)]                                                 |
| P61570 | ERV-K-25                                    | Endogenous retrovirus group K member 25 Env polyprotein (Envelope polyprotein) (HERV-K_11q22.1 provirus ancestral Env polyprotein) [Cleaved into: Surface protein (SU); Transmembrane protein (TM)]                                                                 |
| P61571 | ERV-K-21                                    | Endogenous retrovirus group K member 21 Rec protein (HERV-K_12q14.1 provirus Rec protein)                                                                                                                                                                           |
| P61572 | ERV-K-19                                    | Endogenous retrovirus group K member 19 Rec protein (HERV-K(C19) Rec protein) (HERV-K_19q11 provirus Rec protein)                                                                                                                                                   |
| P61573 | ERV-K-9                                     | Endogenous retrovirus group K member 9 Rec protein (HERV-K(C6) Rec protein) (HERV-K109 Rec protein) (HERV-K_6q14.1 provirus Rec protein)                                                                                                                            |
| P61574 | HERVK_113                                   | Endogenous retrovirus group K member                                                                                                                                                                                                                                |

|        |                              |                                                                                                                                                                                                                                             |
|--------|------------------------------|---------------------------------------------------------------------------------------------------------------------------------------------------------------------------------------------------------------------------------------------|
|        |                              | 113 Rec protein (HERV-K113 Rec protein) (HERV-K_19p13.11 provirus Rec protein)                                                                                                                                                              |
| P61575 | ERVK-8                       | Endogenous retrovirus group K member 8 Rec protein (HERV-K115 Rec protein) (HERV-K_8p23.1 provirus Rec protein)                                                                                                                             |
| P61576 | HERV-K104                    | Endogenous retrovirus group K member 104 Rec protein (HERV-K104 Rec protein) (HERV-K_5q13.3 provirus Rec protein)                                                                                                                           |
| P61578 | ERVK-16                      | Endogenous retrovirus group K member 16 Rec protein (HERV-K_10p14 provirus Rec protein)                                                                                                                                                     |
| P61579 | ERVK-25                      | Endogenous retrovirus group K member 25 Rec protein (Endogenous retrovirus group K member 25) (HERV-K_11q22.1 provirus Rec protein)                                                                                                         |
| P61626 | LYZ LZM                      | Lysozyme C (EC 3.2.1.17) (1,4-beta-N-acetylmuramidase C)                                                                                                                                                                                    |
| P61927 | RPL37                        | 60S ribosomal protein L37 (G1.16)                                                                                                                                                                                                           |
| P61964 | WDR5 BIG3                    | WD repeat-containing protein 5 (BMP2-induced 3-kb gene protein)                                                                                                                                                                             |
| P61978 | HNRNPK HNRPK                 | Heterogeneous nuclear ribonucleoprotein K (hnRNP K) (Transformation up-regulated nuclear protein) (TUNP)                                                                                                                                    |
| P62244 | RPS15A OK/SW-cl.82           | 40S ribosomal protein S15a                                                                                                                                                                                                                  |
| P62249 | RPS16                        | 40S ribosomal protein S16                                                                                                                                                                                                                   |
| P62263 | RPS14 PRO2640                | 40S ribosomal protein S14                                                                                                                                                                                                                   |
| P62266 | RPS23                        | 40S ribosomal protein S23                                                                                                                                                                                                                   |
| P62269 | RPS18 D6S218E                | 40S ribosomal protein S18 (Ke-3) (Ke3)                                                                                                                                                                                                      |
| P62273 | RPS29                        | 40S ribosomal protein S29                                                                                                                                                                                                                   |
| P62280 | RPS11                        | 40S ribosomal protein S11                                                                                                                                                                                                                   |
| P62304 | SNRPE                        | Small nuclear ribonucleoprotein E (snRNP-E) (Sm protein E) (Sm-E) (SmE)                                                                                                                                                                     |
| P62306 | SNRPF PBSCF                  | Small nuclear ribonucleoprotein F (snRNP-F) (Sm protein F) (Sm-F) (SmF)                                                                                                                                                                     |
| P62308 | SNRPG PBSCG                  | Small nuclear ribonucleoprotein G (snRNP-G) (Sm protein G) (Sm-G) (SmG)                                                                                                                                                                     |
| P62310 | LSM3 MDS017                  | U6 snRNA-associated Sm-like protein LSM3                                                                                                                                                                                                    |
| P62312 | LSM6                         | U6 snRNA-associated Sm-like protein LSM6                                                                                                                                                                                                    |
| P62314 | SNRPD1                       | Small nuclear ribonucleoprotein Sm D1 (Sm-D1) (Sm-D autoantigen) (snRNP core protein D1)                                                                                                                                                    |
| P62316 | SNRPD2 SNRPD1                | Small nuclear ribonucleoprotein Sm D2 (Sm-D2) (snRNP core protein D2)                                                                                                                                                                       |
| P62318 | SNRPD3                       | Small nuclear ribonucleoprotein Sm D3 (Sm-D3) (snRNP core protein D3)                                                                                                                                                                       |
| P62380 | TBPL1 TLF TLP TLP21 TRF2 TRP | TATA box-binding protein-like protein 1 (TBP-like protein 1) (21 kDa TBP-like protein) (Second TBP of unique DNA protein) (STUD) (TATA box-binding protein-related factor 2) (TBP-related factor 2) (TBP-like factor) (TBP-related protein) |
| P62424 | RPL7A SURF-3 SURF3           | 60S ribosomal protein L7a (PLA-X polypeptide) (Surfeit locus protein 3)                                                                                                                                                                     |
| P62487 | POLR2G RPB7                  | DNA-directed RNA polymerase II subunit RPB7 (RNA polymerase II subunit B7)                                                                                                                                                                  |

|        |                       |                                                                                                                                                                                                                   |
|--------|-----------------------|-------------------------------------------------------------------------------------------------------------------------------------------------------------------------------------------------------------------|
|        |                       | (DNA-directed RNA polymerase II subunit G) (RNA polymerase II 19 kDa subunit) (RPB19)                                                                                                                             |
| P62495 | ETF1 ERF1 RF1 SUP45L1 | Eukaryotic peptide chain release factor subunit 1 (Eukaryotic release factor 1) (eRF1) (Protein C11) (TB3-1)                                                                                                      |
| P62633 | CNBP RNF163 ZNF9      | Cellular nucleic acid-binding protein (CNBP) (Zinc finger protein 9)                                                                                                                                              |
| P62750 | RPL23A                | 60S ribosomal protein L23a                                                                                                                                                                                        |
| P62753 | RPS6 OK/SW-cl.2       | 40S ribosomal protein S6 (Phosphoprotein NP33)                                                                                                                                                                    |
| P62826 | RAN ARA24 OK/SW-cl.81 | GTP-binding nuclear protein Ran (Androgen receptor-associated protein 24) (GTPase Ran) (Ras-like protein TC4) (Ras-related nuclear protein)                                                                       |
| P62829 | RPL23                 | 60S ribosomal protein L23 (60S ribosomal protein L17)                                                                                                                                                             |
| P62841 | RPS15 RIG             | 40S ribosomal protein S15 (RIG protein)                                                                                                                                                                           |
| P62861 | FAU                   | 40S ribosomal protein S30                                                                                                                                                                                         |
| P62873 | GNB1                  | Guanine nucleotide-binding protein G(I)/G(S)/G(T) subunit beta-1 (Transducin beta chain 1)                                                                                                                        |
| P62875 | POLR2L                | DNA-directed RNA polymerases I, II, and III subunit RPABC5 (RNA polymerases I, II, and III subunit ABC5) (DNA-directed RNA polymerase III subunit L) (RNA polymerase II 7.6 kDa subunit) (RPB7.6) (RPB10 homolog) |
| P62879 | GNB2                  | Guanine nucleotide-binding protein G(I)/G(S)/G(T) subunit beta-2 (G protein subunit beta-2) (Transducin beta chain 2)                                                                                             |
| P62888 | RPL30                 | 60S ribosomal protein L30                                                                                                                                                                                         |
| P62891 | RPL39                 | 60S ribosomal protein L39                                                                                                                                                                                         |
| P62899 | RPL31                 | 60S ribosomal protein L31                                                                                                                                                                                         |
| P62906 | RPL10A NEDD6          | 60S ribosomal protein L10a (CSA-19) (Neural precursor cell expressed developmentally down-regulated protein 6) (NEDD-6)                                                                                           |
| P62910 | RPL32 PP9932          | 60S ribosomal protein L32                                                                                                                                                                                         |
| P62913 | RPL11                 | 60S ribosomal protein L11 (CLL-associated antigen KW-12)                                                                                                                                                          |
| P62917 | RPL8                  | 60S ribosomal protein L8                                                                                                                                                                                          |
| P62979 | RPS27A UBA80 UBCEP1   | Ubiquitin-40S ribosomal protein S27a (Ubiquitin carboxyl extension protein 80) [Cleaved into: Ubiquitin; 40S ribosomal protein S27a]                                                                              |
| P62987 | UBA52 UBCEP2          | Ubiquitin-60S ribosomal protein L40 (CEP52) (Ubiquitin A-52 residue ribosomal protein fusion product 1) [Cleaved into: Ubiquitin; 60S ribosomal protein L40]                                                      |
| P62995 | TRA2B SFRS10          | Transformer-2 protein homolog beta (TRA-2 beta) (TRA2-beta) (hTRA2-beta) (Splicing factor, arginine/serine-rich 10) (Transformer-2 protein homolog B)                                                             |
| P63119 | ERV-K-21              | Endogenous retrovirus group K member 21 Pro protein (HERV-K_12q14.1 provirus ancestral Pro protein) (EC 3.4.23.50)                                                                                                |

|        |           |                                                                                                                                                                                                                                                                                                                   |
|--------|-----------|-------------------------------------------------------------------------------------------------------------------------------------------------------------------------------------------------------------------------------------------------------------------------------------------------------------------|
|        |           | (Protease) (Proteinase) (PR)                                                                                                                                                                                                                                                                                      |
| P63120 | ERVK-19   | Endogenous retrovirus group K member 19 Pro protein (HERV-K(C19) Pro protein) (HERV-K_19q12 provirus ancestral Pro protein) (EC 3.4.23.50) (Protease) (Proteinase) (PR)                                                                                                                                           |
| P63121 | HERVK_113 | Endogenous retrovirus group K member 113 Pro protein (HERV-K113 envelope protein) (HERV-K_19p13.11 provirus ancestral Pro protein) (EC 3.4.23.50) (Protease) (Proteinase) (PR)                                                                                                                                    |
| P63122 | ERVK-8    | Endogenous retrovirus group K member 8 Pro protein (HERV-K115 Pro protein) (HERV-K_8p23.1 provirus ancestral Pro protein) (EC 3.4.23.50) (Protease) (Proteinase) (PR)                                                                                                                                             |
| P63123 | ERVK-18   | Endogenous retrovirus group K member 18 Pro protein (HERV-K(C1a) Pro protein) (HERV-K110 Pro protein) (HERV-K18 Pro protein) (HERV-K_1q23.3 provirus ancestral Pro protein) (EC 3.4.23.50) (Protease) (Proteinase) (PR)                                                                                           |
| P63124 | HERV-K104 | Endogenous retrovirus group K member 104 Pro protein (HERV-K104 Pro protein) (HERV-K_5q13.3 provirus ancestral Pro protein) (EC 3.4.23.50) (Protease) (Proteinase) (PR)                                                                                                                                           |
| P63125 | ERVK-25   | Endogenous retrovirus group K member 25 Pro protein (HERV-K_11q22.1 provirus ancestral Pro protein) (EC 3.4.23.50) (Protease) (Proteinase) (PR)                                                                                                                                                                   |
| P63127 | ERVK-9    | Endogenous retrovirus group K member 9 Pro protein (HERV-K(C6) Pro protein) (HERV-K109 Pro protein) (HERV-K_6q14.1 provirus ancestral Pro protein) (EC 3.4.23.50) (Protease) (Proteinase) (PR)                                                                                                                    |
| P63128 | ERVK-9    | Endogenous retrovirus group K member 9 Pol protein (HERV-K(C6) Gag-Pol protein) (HERV-K109 Gag-Pol protein) (HERV-K_6q14.1 provirus ancestral Gag-Pol polyprotein) [Includes: Protease (EC 3.4.23.50) (PR) (Retropepsin); Reverse transcriptase/ribonuclease H (EC 2.7.7.49) (EC 2.7.7.7) (EC 3.1.26.4) (p66 RT)] |
| P63129 | ERVK-24   | Endogenous retrovirus group K member 24 Pro protein (HERV-K101 envelope protein) (HERV-K_22q11.21 provirus ancestral Pro protein) (EC 3.4.23.50) (Protease) (Proteinase) (PR)                                                                                                                                     |
| P63131 | ERVK-7    | Endogenous retrovirus group K member 7 Pro protein (HERV-K(III) Pro protein) (HERV-K102 Pro protein) (HERV-K_1q22 provirus ancestral Pro protein) (EC 3.4.23.50) (Protease) (Proteinase) (PR)                                                                                                                     |
| P63132 | HERVK_113 | Endogenous retrovirus group K member 113 Pol protein (HERV-K113 Pol protein) (HERV-K_19p13.11 provirus ancestral Pol protein) [Includes: Reverse transcriptase (RT) (EC 2.7.7.49); Ribonuclease H                                                                                                                 |

|        |                            |                                                                                                                                                                                                                                                                                                                                                                                                                 |
|--------|----------------------------|-----------------------------------------------------------------------------------------------------------------------------------------------------------------------------------------------------------------------------------------------------------------------------------------------------------------------------------------------------------------------------------------------------------------|
|        |                            | (RNase H) (EC 3.1.26.4); Integrase (IN)]                                                                                                                                                                                                                                                                                                                                                                        |
| P63133 | ERVK-8                     | Endogenous retrovirus group K member 8 Pol protein (HERV-K115 Pol protein) (HERV-K_8p23.1 provirus ancestral Pol protein) [Includes: Reverse transcriptase (RT) (EC 2.7.7.49); Ribonuclease H (RNase H) (EC 3.1.26.4); Integrase (IN)]                                                                                                                                                                          |
| P63135 | ERVK-7                     | Endogenous retrovirus group K member 7 Pol protein (HERV-K(III) Pol protein) (HERV-K102 Pol protein) (HERV-K_1q22 provirus ancestral Pol protein) [Includes: Reverse transcriptase (RT) (EC 2.7.7.49); Ribonuclease H (RNase H) (EC 3.1.26.4); Integrase (IN)]                                                                                                                                                  |
| P63136 | ERVK-25                    | Endogenous retrovirus group K member 25 Pol protein (HERV-K_11q22.1 provirus ancestral Pol protein) [Includes: Reverse transcriptase (RT) (EC 2.7.7.49); Ribonuclease H (RNase H) (EC 3.1.26.4); Integrase (IN)]                                                                                                                                                                                                |
| P63162 | SNRPN HCERN3 SMN           | Small nuclear ribonucleoprotein-associated protein N (snRNP-N) (Sm protein D) (Sm-D) (Sm protein N) (Sm-N) (SmN) (Tissue-specific-splicing protein)                                                                                                                                                                                                                                                             |
| P63215 | GNG3 GNGT3                 | Guanine nucleotide-binding protein G(I)/G(S)/G(O) subunit gamma-3                                                                                                                                                                                                                                                                                                                                               |
| P63218 | GNG5 GNGT5                 | Guanine nucleotide-binding protein G(I)/G(S)/G(O) subunit gamma-5                                                                                                                                                                                                                                                                                                                                               |
| P63244 | GNB2L1 HLC7 PIG21          | Guanine nucleotide-binding protein subunit beta-2-like 1 (Cell proliferation-inducing gene 21 protein) (Guanine nucleotide-binding protein subunit beta-like protein 12.3) (Human lung cancer oncogene 7 protein) (HLC-7) (Receptor for activated C kinase) (Receptor of activated protein kinase C 1) (RACK1) [Cleaved into: Guanine nucleotide-binding protein subunit beta-2-like 1, N-terminally processed] |
| P63272 | SUPT4H1 SPT4H SUPT4H       | Transcription elongation factor SPT4 (hSPT4) (DRB sensitivity-inducing factor 14 kDa subunit) (DSIF p14) (DRB sensitivity-inducing factor small subunit) (DSIF small subunit)                                                                                                                                                                                                                                   |
| P67809 | YBX1 NSEP1 YB1             | Nuclease-sensitive element-binding protein 1 (CCAAT-binding transcription factor I subunit A) (CBF-A) (DNA-binding protein B) (DBPB) (Enhancer factor I subunit A) (EFI-A) (Y-box transcription factor) (Y-box-binding protein 1) (YB-1)                                                                                                                                                                        |
| P68104 | EEF1A1 EEF1A EF1A LENG7    | Elongation factor 1-alpha 1 (EF-1-alpha-1) (Elongation factor Tu) (EF-Tu) (Eukaryotic elongation factor 1 A-1) (eEF1A-1) (Leukocyte receptor cluster member 7)                                                                                                                                                                                                                                                  |
| P68400 | CSNK2A1 CK2A1              | Casein kinase II subunit alpha (CK II alpha) (EC 2.7.11.1)                                                                                                                                                                                                                                                                                                                                                      |
| P78316 | NOP14 C4orf9 NOL14 RES4-25 | Nucleolar protein 14 (Nucleolar complex protein 14)                                                                                                                                                                                                                                                                                                                                                             |
| P78317 | RNF4 SNURF RES4-26         | E3 ubiquitin-protein ligase RNF4 (EC 6.3.2.-) (RING finger protein 4) (Small                                                                                                                                                                                                                                                                                                                                    |

|        |                                      |                                                                                                                                                                                                                                                                                                                                                                                                                                                              |
|--------|--------------------------------------|--------------------------------------------------------------------------------------------------------------------------------------------------------------------------------------------------------------------------------------------------------------------------------------------------------------------------------------------------------------------------------------------------------------------------------------------------------------|
|        |                                      | nuclear ring finger protein) (Protein SNURF)                                                                                                                                                                                                                                                                                                                                                                                                                 |
| P78324 | SIRPA BIT MFR MYD1 PTPNS1 SHPS1 SIRP | Tyrosine-protein phosphatase non-receptor type substrate 1 (SHP substrate 1) (SHPS-1) (Brain Ig-like molecule with tyrosine-based activation motifs) (Bit) (CD172 antigen-like family member A) (Inhibitory receptor SHPS-1) (Macrophage fusion receptor) (MyD-1 antigen) (Signal-regulatory protein alpha-1) (Sirp-alpha-1) (Signal-regulatory protein alpha-2) (Sirp-alpha-2) (Signal-regulatory protein alpha-3) (Sirp-alpha-3) (p84) (CD antigen CD172a) |
| P78332 | RBM6 DEF3                            | RNA-binding protein 6 (Lung cancer antigen NY-LU-12) (Protein G16) (RNA-binding motif protein 6) (RNA-binding protein DEF-3)                                                                                                                                                                                                                                                                                                                                 |
| P78344 | EIF4G2 DAP5 OK/SW-cl.75              | Eukaryotic translation initiation factor 4 gamma 2 (eIF-4-gamma 2) (eIF-4G 2) (eIF4G 2) (Death-associated protein 5) (DAP-5) (p97)                                                                                                                                                                                                                                                                                                                           |
| P78346 | RPP30 RNASEP2                        | Ribonuclease P protein subunit p30 (RNaseP protein p30) (EC 3.1.26.5) (RNase P subunit 2)                                                                                                                                                                                                                                                                                                                                                                    |
| P78363 | ABCA4 ABCR                           | Retinal-specific ATP-binding cassette transporter (ATP-binding cassette sub-family A member 4) (RIM ABC transporter) (RIM protein) (RmP) (Stargardt disease protein)                                                                                                                                                                                                                                                                                         |
| P78406 | RAE1 MRNP41                          | mRNA export factor (Rae1 protein homolog) (mRNA-associated protein mrnp 41)                                                                                                                                                                                                                                                                                                                                                                                  |
| P78563 | ADARB1 ADAR2 DRADA2 RED1             | Double-stranded RNA-specific editase 1 (EC 3.5.4.37) (RNA-editing deaminase 1) (RNA-editing enzyme 1) (dsRNA adenosine deaminase)                                                                                                                                                                                                                                                                                                                            |
| P80192 | MAP3K9 MLK1 PRKE1                    | Mitogen-activated protein kinase kinase kinase 9 (EC 2.7.11.25) (Mixed lineage kinase 1)                                                                                                                                                                                                                                                                                                                                                                     |
| P80362 |                                      | Ig kappa chain V-I region WAT                                                                                                                                                                                                                                                                                                                                                                                                                                |
| P80419 |                                      | Ig heavy chain V-III region GAR                                                                                                                                                                                                                                                                                                                                                                                                                              |
| P80421 |                                      | Ig heavy chain V-I region DOT                                                                                                                                                                                                                                                                                                                                                                                                                                |
| P80422 |                                      | Ig gamma lambda chain V-II region DOT                                                                                                                                                                                                                                                                                                                                                                                                                        |
| P80748 |                                      | Ig lambda chain V-III region LOI                                                                                                                                                                                                                                                                                                                                                                                                                             |
| P82094 | TMF1 ARA160                          | TATA element modulatory factor (TMF) (Androgen receptor coactivator 160 kDa protein) (Androgen receptor-associated protein of 160 kDa)                                                                                                                                                                                                                                                                                                                       |
| P82650 | MRPS22 C3orf5 RPMS22 GK002           | 28S ribosomal protein S22, mitochondrial (MRP-S22) (S22mt)                                                                                                                                                                                                                                                                                                                                                                                                   |
| P82663 | MRPS25 RPMS25                        | 28S ribosomal protein S25, mitochondrial (MRP-S25) (S25mt)                                                                                                                                                                                                                                                                                                                                                                                                   |
| P82664 | MRPS10 MSTP040                       | 28S ribosomal protein S10, mitochondrial (MRP-S10) (S10mt)                                                                                                                                                                                                                                                                                                                                                                                                   |
| P82675 | MRPS5                                | 28S ribosomal protein S5, mitochondrial (MRP-S5) (S5mt)                                                                                                                                                                                                                                                                                                                                                                                                      |
| P82912 | MRPS11 RPMS11 HCC2                   | 28S ribosomal protein S11, mitochondrial (MRP-S11) (S11mt) (Cervical cancer                                                                                                                                                                                                                                                                                                                                                                                  |



|        |                                        |                                                                                                                                                                                                      |
|--------|----------------------------------------|------------------------------------------------------------------------------------------------------------------------------------------------------------------------------------------------------|
|        |                                        | proto-oncogene 2 protein) (HCC-2)                                                                                                                                                                    |
| P82914 | MRPS15 RPMS15 DC37                     | 28S ribosomal protein S15, mitochondrial (MRP-S15) (S15mt)                                                                                                                                           |
| P82921 | MRPS21 RPMS21 MDS016                   | 28S ribosomal protein S21, mitochondrial (MRP-S21) (S21mt)                                                                                                                                           |
| P82930 | MRPS34                                 | 28S ribosomal protein S34, mitochondrial (MRP-S34) (S34mt)                                                                                                                                           |
| P82933 | MRPS9 RPMS9                            | 28S ribosomal protein S9, mitochondrial (MRP-S9) (S9mt)                                                                                                                                              |
| P83593 |                                        | Ig kappa chain V-IV region STH (Fragment)                                                                                                                                                            |
| P83881 | RPL36A RPL44 GIG15 MIG6                | 60S ribosomal protein L36a (60S ribosomal protein L44) (Cell growth-inhibiting gene 15 protein) (Cell migration-inducing gene 6 protein)                                                             |
| P84103 | SRSF3 SFRS3 SRP20                      | Serine/arginine-rich splicing factor 3 (Pre-mRNA-splicing factor SRP20) (Splicing factor, arginine/serine-rich 3)                                                                                    |
| P98073 | TMPRSS15 ENTK PRSS7                    | Enteropeptidase (EC 3.4.21.9) (Enterokinase) (Serine protease 7) (Transmembrane protease serine 15) [Cleaved into: Enteropeptidase non-catalytic heavy chain; Enteropeptidase catalytic light chain] |
| P98168 | ZXDA                                   | Zinc finger X-linked protein ZXDA                                                                                                                                                                    |
| P98169 | ZXDB                                   | Zinc finger X-linked protein ZXDB                                                                                                                                                                    |
| P98175 | RBM10 DXS8237E GPATC9 GPATCH9 KIAA0122 | RNA-binding protein 10 (G patch domain-containing protein 9) (RNA-binding motif protein 10) (RNA-binding protein S1-1) (S1-1)                                                                        |
| P98179 | RBM3 RNPL                              | RNA-binding protein 3 (RNA-binding motif protein 3) (RNPL)                                                                                                                                           |
| Q00341 | HDLBP HBP VGL                          | Vigilin (High density lipoprotein-binding protein) (HDL-binding protein)                                                                                                                             |
| Q00526 | CDK3 CDKN3                             | Cyclin-dependent kinase 3 (EC 2.7.11.22) (Cell division protein kinase 3)                                                                                                                            |
| Q00532 | CDKL1                                  | Cyclin-dependent kinase-like 1 (EC 2.7.11.22) (Protein kinase p42 KKIALRE) (Serine/threonine-protein kinase KKIALRE)                                                                                 |
| Q00534 | CDK6 CDKN6                             | Cyclin-dependent kinase 6 (EC 2.7.11.22) (Cell division protein kinase 6) (Serine/threonine-protein kinase PLSTIRE)                                                                                  |
| Q00535 | CDK5 CDKN5                             | Cyclin-dependent-like kinase 5 (EC 2.7.11.1) (Cell division protein kinase 5) (Serine/threonine-protein kinase PSSALRE) (Tau protein kinase II catalytic subunit) (TPKII catalytic subunit)          |
| Q00536 | CDK16 PCTAIRE1 PCTK1                   | Cyclin-dependent kinase 16 (EC 2.7.11.22) (Cell division protein kinase 16) (PCTAIRE-motif protein kinase 1) (Serine/threonine-protein kinase PCTAIRE-1)                                             |
| Q00537 | CDK17 PCTAIRE2 PCTK2                   | Cyclin-dependent kinase 17 (EC 2.7.11.22) (Cell division protein kinase 17) (PCTAIRE-motif protein kinase 2) (Serine/threonine-protein kinase PCTAIRE-2)                                             |

|        |                           |                                                                                                                                                                                                                                                                                  |
|--------|---------------------------|----------------------------------------------------------------------------------------------------------------------------------------------------------------------------------------------------------------------------------------------------------------------------------|
| Q00653 | NFKB2 LYT10               | Nuclear factor NF-kappa-B p100 subunit (DNA-binding factor KBF2) (H2TF1) (Lymphocyte translocation chromosome 10 protein) (Nuclear factor of kappa light polypeptide gene enhancer in B-cells 2) (Oncogene Lys-10) (Lyt10) [Cleaved into: Nuclear factor NF-kappa-B p52 subunit] |
| Q00978 | IRF9 ISGF3G               | Interferon regulatory factor 9 (IRF-9) (IFN-alpha-responsive transcription factor subunit) (ISGF3 p48 subunit) (Interferon-stimulated gene factor 3 gamma) (ISGF-3 gamma) (Transcriptional regulator ISGF3 subunit gamma)                                                        |
| Q01085 | TIAL1                     | Nucleolysin TIAR (TIA-1-related protein)                                                                                                                                                                                                                                         |
| Q01130 | SRSF2 SFRS2               | Serine/arginine-rich splicing factor 2 (Protein PR264) (Splicing component, 35 kDa) (Splicing factor SC35) (SC-35) (Splicing factor, arginine/serine-rich 2)                                                                                                                     |
| Q01201 | RELB                      | Transcription factor RelB (I-Rel)                                                                                                                                                                                                                                                |
| Q01484 | ANK2                      | Ankyrin-2 (ANK-2) (Ankyrin-B) (Brain ankyrin) (Non-erythroid ankyrin)                                                                                                                                                                                                            |
| Q01780 | EXOSC10 PMSCL PMSCL2 RRP6 | Exosome component 10 (EC 3.1.13.-) (Autoantigen PM/Scl 2) (P100 polymyositis-scleroderma overlap syndrome-associated autoantigen) (Polymyositis/scleroderma autoantigen 100 kDa) (PM/Scl-100) (Polymyositis/scleroderma autoantigen 2)                                           |
| Q02156 | PRKCE PKCE                | Protein kinase C epsilon type (EC 2.7.11.13) (nPKC-epsilon)                                                                                                                                                                                                                      |
| Q02386 | ZNF45 KOX5 ZNF13          | Zinc finger protein 45 (BRC1744) (Zinc finger protein 13) (Zinc finger protein KOX5)                                                                                                                                                                                             |
| Q02556 | IRF8 ICSBP1               | Interferon regulatory factor 8 (IRF-8) (Interferon consensus sequence-binding protein) (H-ICSBP) (ICSBP)                                                                                                                                                                         |
| Q02750 | MAP2K1 MEK1 PRKMK1        | Dual specificity mitogen-activated protein kinase kinase 1 (MAP kinase kinase 1) (MAPKK 1) (MKK1) (EC 2.7.12.2) (ERK activator kinase 1) (MAPK/ERK kinase 1) (MEK 1)                                                                                                             |
| Q02779 | MAP3K10 MLK2 MST          | Mitogen-activated protein kinase kinase kinase 10 (EC 2.7.11.25) (Mixed lineage kinase 2) (Protein kinase MST)                                                                                                                                                                   |
| Q03112 | MECOM EVI1                | MDS1 and EVI1 complex locus protein EVI1 (Ecotropic virus integration site 1 protein homolog) (EVI-1)                                                                                                                                                                            |
| Q03518 | TAP1 ABCB2 PSF1 RING4 Y3  | Antigen peptide transporter 1 (APT1) (ATP-binding cassette sub-family B member 2) (Peptide supply factor 1) (Peptide transporter PSF1) (PSF-1) (Peptide transporter TAP1) (Peptide transporter involved in antigen processing 1) (Really interesting new gene 4 protein)         |
| Q03923 | ZNF85                     | Zinc finger protein 85 (Zinc finger protein HPF4) (Zinc finger protein HTF1)                                                                                                                                                                                                     |
| Q03924 | ZNF117                    | Zinc finger protein 117 (Provirus-linked krueppel) (h-PLK) (Zinc finger protein HPF9)                                                                                                                                                                                            |

|        |                           |                                                                                                                                                                                                                                                                     |
|--------|---------------------------|---------------------------------------------------------------------------------------------------------------------------------------------------------------------------------------------------------------------------------------------------------------------|
| Q03936 | ZNF92                     | Zinc finger protein 92 (Zinc finger protein HTF12)                                                                                                                                                                                                                  |
| Q03938 | ZNF90                     | Zinc finger protein 90 (Zinc finger protein HTF9)                                                                                                                                                                                                                   |
| Q04206 | RELA NFKB3                | Transcription factor p65 (Nuclear factor NF-kappa-B p65 subunit) (Nuclear factor of kappa light polypeptide gene enhancer in B-cells 3)                                                                                                                             |
| Q04637 | EIF4G1 EIF4F EIF4G EIF4GI | Eukaryotic translation initiation factor 4 gamma 1 (eIF-4-gamma 1) (eIF-4G 1) (eIF-4G1) (p220)                                                                                                                                                                      |
| Q04721 | NOTCH2                    | Neurogenic locus notch homolog protein 2 (Notch 2) (hN2) [Cleaved into: Notch 2 extracellular truncation (N2ECD); Notch 2 intracellular domain (N2ICD)]                                                                                                             |
| Q04724 | TLE1                      | Transducin-like enhancer protein 1 (E(Sp1) homolog) (Enhancer of split groucho-like protein 1) (ESG1)                                                                                                                                                               |
| Q04725 | TLE2                      | Transducin-like enhancer protein 2 (Enhancer of split groucho-like protein 2) (ESG2)                                                                                                                                                                                |
| Q04726 | TLE3 KIAA1547             | Transducin-like enhancer protein 3 (Enhancer of split groucho-like protein 3) (ESG3)                                                                                                                                                                                |
| Q04727 | TLE4 GRG4 KIAA1261        | Transducin-like enhancer protein 4 (Grg-4) (Groucho-related protein 4)                                                                                                                                                                                              |
| Q04756 | HGFAC                     | Hepatocyte growth factor activator (HGF activator) (HGFA) (EC 3.4.21.-) [Cleaved into: Hepatocyte growth factor activator short chain; Hepatocyte growth factor activator long chain]                                                                               |
| Q04759 | PRKCQ PRKCT               | Protein kinase C theta type (EC 2.7.11.13) (nPKC-theta)                                                                                                                                                                                                             |
| Q04864 | REL                       | Proto-oncogene c-Rel                                                                                                                                                                                                                                                |
| Q05048 | CSTF1                     | Cleavage stimulation factor subunit 1 (CF-1 50 kDa subunit) (Cleavage stimulation factor 50 kDa subunit) (CSTF 50 kDa subunit) (CstF-50)                                                                                                                            |
| Q05481 | ZNF91                     | Zinc finger protein 91 (Zinc finger protein HPF7) (Zinc finger protein HTF10)                                                                                                                                                                                       |
| Q05513 | PRKCZ PKC2                | Protein kinase C zeta type (EC 2.7.11.13) (nPKC-zeta)                                                                                                                                                                                                               |
| Q05516 | ZBTB16 PLZF ZNF145        | Zinc finger and BTB domain-containing protein 16 (Promyelocytic leukemia zinc finger protein) (Zinc finger protein 145) (Zinc finger protein PLZF)                                                                                                                  |
| Q05639 | EEF1A2 EEF1AL STN         | Elongation factor 1-alpha 2 (EF-1-alpha-2) (Eukaryotic elongation factor 1 A-2) (eEF1A-2) (Statin-S1)                                                                                                                                                               |
| Q05655 | PRKCD                     | Protein kinase C delta type (EC 2.7.11.13) (Tyrosine-protein kinase PRKCD) (EC 2.7.10.2) (nPKC-delta) [Cleaved into: Protein kinase C delta type regulatory subunit; Protein kinase C delta type catalytic subunit (Sphingosine-dependent protein kinase-1) (SDK1)] |
| Q05823 | RNASEL RNS4               | 2-5A-dependent ribonuclease (2-5A-dependent RNase) (EC 3.1.26.-) (Ribonuclease 4) (Ribonuclease L) (RNase                                                                                                                                                           |

|        |                                          |                                                                                                                                                                                                                                                        |
|--------|------------------------------------------|--------------------------------------------------------------------------------------------------------------------------------------------------------------------------------------------------------------------------------------------------------|
|        |                                          | L)                                                                                                                                                                                                                                                     |
| Q05BV3 | EML5                                     | Echinoderm microtubule-associated protein-like 5 (EMAP-5)                                                                                                                                                                                              |
| Q06265 | EXOSC9 PMSCL1                            | Exosome complex component RRP45 (Autoantigen PM/Scl 1) (Exosome component 9) (P75 polymyositis-scleroderma overlap syndrome-associated autoantigen) (Polymyositis/scleroderma autoantigen 1) (Polymyositis/scleroderma autoantigen 75 kDa) (PM/Scl-75) |
| Q06730 | ZNF33A KIAA0065 KOX31 ZNF11 ZNF11A ZNF33 | Zinc finger protein 33A (Zinc finger and ZAK-associated protein with KRAB domain) (ZZaPK) (Zinc finger protein 11A) (Zinc finger protein KOX31)                                                                                                        |
| Q06732 | ZNF33B KOX2 ZNF11B                       | Zinc finger protein 33B (Zinc finger protein 11B) (Zinc finger protein KOX2)                                                                                                                                                                           |
| Q06787 | FMR1                                     | Fragile X mental retardation protein 1 (FMRP) (Protein FMR-1)                                                                                                                                                                                          |
| Q07002 | CDK18 PCTAIRE3 PCTK3                     | Cyclin-dependent kinase 18 (EC 2.7.11.22) (Cell division protein kinase 18) (PCTAIRE-motif protein kinase 3) (Serine/threonine-protein kinase PCTAIRE-3)                                                                                               |
| Q07352 | ZFP36L1 BERG36 BRF1 ERF1 RNF162B TIS11B  | Zinc finger protein 36, C3H1 type-like 1 (Butyrate response factor 1) (EGF-response factor 1) (ERF-1) (Protein TIS11B)                                                                                                                                 |
| Q07617 | SPAG1                                    | Sperm-associated antigen 1 (HSD-3.8) (Infertility-related sperm protein Spag-1)                                                                                                                                                                        |
| Q07666 | KHDRBS1 SAM68                            | KH domain-containing, RNA-binding, signal transduction-associated protein 1 (GAP-associated tyrosine phosphoprotein p62) (Src-associated in mitosis 68 kDa protein) (Sam68) (p21 Ras GTPase-activating protein-associated p62) (p68)                   |
| Q07955 | SRSF1 ASF SF2 SF2P33 SFRS1 OK/SW-cl.3    | Serine/arginine-rich splicing factor 1 (Alternative-splicing factor 1) (ASF-1) (Splicing factor, arginine/serine-rich 1) (pre-mRNA-splicing factor SF2, P33 subunit)                                                                                   |
| Q08170 | SRSF4 SFRS4 SRP75                        | Serine/arginine-rich splicing factor 4 (Pre-mRNA-splicing factor SRP75) (SRP001LB) (Splicing factor, arginine/serine-rich 4)                                                                                                                           |
| Q08211 | DHX9 DDX9 LKP NDH2                       | ATP-dependent RNA helicase A (RHA) (EC 3.6.4.13) (DEAH box protein 9) (Leukophysin) (LKP) (Nuclear DNA helicase II) (NDH II)                                                                                                                           |
| Q08AN1 | ZNF616                                   | Zinc finger protein 616                                                                                                                                                                                                                                |
| Q08ER8 | ZNF543                                   | Zinc finger protein 543                                                                                                                                                                                                                                |
| Q09013 | DMPK DM1PK MDPK                          | Myotonin-protein kinase (MT-PK) (EC 2.7.11.1) (DM-kinase) (DMK) (DM1 protein kinase) (DMPK) (Myotonic dystrophy protein kinase)                                                                                                                        |
| Q09028 | RBBP4 RBAP48                             | Histone-binding protein RBBP4 (Chromatin assembly factor 1 subunit C) (CAF-1 subunit C) (Chromatin assembly factor I p48 subunit) (CAF-I 48 kDa subunit) (CAF-I p48) (Nucleosome-                                                                      |

|        |                         |                                                                                                                                                                                                                                                                                                         |
|--------|-------------------------|---------------------------------------------------------------------------------------------------------------------------------------------------------------------------------------------------------------------------------------------------------------------------------------------------------|
|        |                         | remodeling factor subunit RBAP48)<br>(Retinoblastoma-binding protein 4) (RBBP-4) (Retinoblastoma-binding protein p48)                                                                                                                                                                                   |
| Q09161 | NCBP1 CBP80 NCBP        | Nuclear cap-binding protein subunit 1 (80 kDa nuclear cap-binding protein) (CBP80) (NCBP 80 kDa subunit)                                                                                                                                                                                                |
| Q09428 | ABCC8 HRINS SUR SUR1    | ATP-binding cassette sub-family C member 8 (Sulfonylurea receptor 1)                                                                                                                                                                                                                                    |
| Q09472 | EP300 P300              | Histone acetyltransferase p300 (p300 HAT) (EC 2.3.1.48) (E1A-associated protein p300)                                                                                                                                                                                                                   |
| Q09FC8 | ZNF415                  | Zinc finger protein 415                                                                                                                                                                                                                                                                                 |
| Q0VGE8 | ZNF816 ZNF816A          | Zinc finger protein 816                                                                                                                                                                                                                                                                                 |
| Q10570 | CPSF1 CPSF160           | Cleavage and polyadenylation specificity factor subunit 1 (Cleavage and polyadenylation specificity factor 160 kDa subunit) (CPSF 160 kDa subunit)                                                                                                                                                      |
| Q12769 | NUP160 KIAA0197 NUP120  | Nuclear pore complex protein Nup160 (160 kDa nucleoporin) (Nucleoporin Nup160)                                                                                                                                                                                                                          |
| Q12770 | SCAP KIAA0199 PSEC0227  | Sterol regulatory element-binding protein cleavage-activating protein (SCAP) (SREBP cleavage-activating protein)                                                                                                                                                                                        |
| Q12788 | TBL3 SAZD               | Transducin beta-like protein 3 (WD repeat-containing protein SAZD)                                                                                                                                                                                                                                      |
| Q12834 | CDC20                   | Cell division cycle protein 20 homolog (p55CDC)                                                                                                                                                                                                                                                         |
| Q12849 | GRSF1                   | G-rich sequence factor 1 (GRSF-1)                                                                                                                                                                                                                                                                       |
| Q12851 | MAP4K2 GCK RAB8IP       | Mitogen-activated protein kinase kinase kinase 2 (EC 2.7.11.1) (B lymphocyte serine/threonine-protein kinase) (Germinal center kinase) (GC kinase) (MAPK/ERK kinase kinase kinase 2) (MEK kinase kinase 2) (MEKKK 2) (Rab8-interacting protein)                                                         |
| Q12872 | SFSWAP SFRS8 SWAP       | Splicing factor, suppressor of white-apricot homolog (Splicing factor, arginine/serine-rich 8) (Suppressor of white apricot protein homolog)                                                                                                                                                            |
| Q12874 | SF3A3 SAP61             | Splicing factor 3A subunit 3 (SF3a60) (Spliceosome-associated protein 61) (SAP 61)                                                                                                                                                                                                                      |
| Q12901 | ZNF155                  | Zinc finger protein 155                                                                                                                                                                                                                                                                                 |
| Q12904 | AIMP1 EMAP2 SCYE1       | Aminoacyl tRNA synthase complex-interacting multifunctional protein 1 (Multisynthase complex auxiliary component p43) [Cleaved into: Endothelial monocyte-activating polypeptide 2 (EMAP-2) (Endothelial monocyte-activating polypeptide II) (EMAP-II) (Small inducible cytokine subfamily E member 1)] |
| Q12906 | ILF3 DRBF MPHOSPH4 NF90 | Interleukin enhancer-binding factor 3 (Double-stranded RNA-binding protein 76) (DRBP76) (M-phase phosphoprotein 4) (MPP4) (Nuclear factor associated with dsRNA) (NFAR) (Nuclear factor of activated T-cells 90 kDa) (NF-AT-90) (Translational control protein 80) (TCP80)                              |
| Q12926 | ELAVL2 HUB              | ELAV-like protein 2 (ELAV-like neuronal                                                                                                                                                                                                                                                                 |

|        |                                    |                                                                                                                                                                                                                                                                                                     |
|--------|------------------------------------|-----------------------------------------------------------------------------------------------------------------------------------------------------------------------------------------------------------------------------------------------------------------------------------------------------|
|        |                                    | protein 1) (Hu-antigen B) (HuB) (Nervous system-specific RNA-binding protein Hel-N1)                                                                                                                                                                                                                |
| Q12955 | ANK3                               | Ankyrin-3 (ANK-3) (Ankyrin-G)                                                                                                                                                                                                                                                                       |
| Q12996 | CSTF3                              | Cleavage stimulation factor subunit 3 (CF-1 77 kDa subunit) (Cleavage stimulation factor 77 kDa subunit) (CSTF 77 kDa subunit) (CstF-77)                                                                                                                                                            |
| Q13033 | STRN3 GS2NA SG2NA                  | Striatin-3 (Cell cycle autoantigen SG2NA) (S/G2 antigen)                                                                                                                                                                                                                                            |
| Q13043 | STK4 KRS2 MST1                     | Serine/threonine-protein kinase 4 (EC 2.7.11.1) (Mammalian STE20-like protein kinase 1) (MST-1) (STE20-like kinase MST1) (Serine/threonine-protein kinase Krs-2) [Cleaved into: Serine/threonine-protein kinase 4 37kDa subunit (MST1/N); Serine/threonine-protein kinase 4 18kDa subunit (MST1/C)] |
| Q13064 | MKRN3 D15S9 RNF63 ZNF127           | Probable E3 ubiquitin-protein ligase makorin-3 (EC 6.3.2.-) (RING finger protein 63) (Zinc finger protein 127)                                                                                                                                                                                      |
| Q13084 | MRPL28 MAAT1                       | 39S ribosomal protein L28, mitochondrial (L28mt) (MRP-L28) (Melanoma antigen p15) (Melanoma-associated antigen recognized by T-lymphocytes)                                                                                                                                                         |
| Q13105 | ZBTB17 MIZ1 ZNF151 ZNF60           | Zinc finger and BTB domain-containing protein 17 (Myc-interacting zinc finger protein 1) (Miz-1) (Zinc finger protein 151) (Zinc finger protein 60)                                                                                                                                                 |
| Q13106 | ZNF154 KIAA2003                    | Zinc finger protein 154                                                                                                                                                                                                                                                                             |
| Q13112 | CHAF1B CAF1A CAF1P60 MPHOSPH7 MPP7 | Chromatin assembly factor 1 subunit B (CAF-1 subunit B) (Chromatin assembly factor I p60 subunit) (CAF-I 60 kDa subunit) (CAF-I p60) (M-phase phosphoprotein 7)                                                                                                                                     |
| Q13117 | DAZ2                               | Deleted in azoospermia protein 2                                                                                                                                                                                                                                                                    |
| Q13131 | PRKAA1 AMPK1                       | 5'-AMP-activated protein kinase catalytic subunit alpha-1 (AMPK subunit alpha-1) (EC 2.7.11.1) (Acetyl-CoA carboxylase kinase) (ACACA kinase) (EC 2.7.11.27) (Hydroxymethylglutaryl-CoA reductase kinase) (HMGCR kinase) (EC 2.7.11.31) (Tau-protein kinase PRKAA1) (EC 2.7.11.26)                  |
| Q13148 | TARDBP TDP43                       | TAR DNA-binding protein 43 (TDP-43)                                                                                                                                                                                                                                                                 |
| Q13151 | HNRNPA0 HNRPA0                     | Heterogeneous nuclear ribonucleoprotein A0 (hnRNP A0)                                                                                                                                                                                                                                               |
| Q13153 | PAK1                               | Serine/threonine-protein kinase PAK 1 (EC 2.7.11.1) (Alpha-PAK) (p21-activated kinase 1) (PAK-1) (p65-PAK)                                                                                                                                                                                          |
| Q13163 | MAP2K5 MEK5 MKK5 PRKMK5            | Dual specificity mitogen-activated protein kinase kinase 5 (MAP kinase kinase 5) (MAPKK 5) (EC 2.7.12.2) (MAPK/ERK kinase 5) (MEK 5)                                                                                                                                                                |
| Q13164 | MAPK7 BMK1 ERK5 PRKM7              | Mitogen-activated protein kinase 7 (MAP kinase 7) (MAPK 7) (EC 2.7.11.24) (Big MAP kinase 1) (BMK-1) (Extracellular signal-regulated kinase 5) (ERK-5)                                                                                                                                              |

|        |                           |                                                                                                                                                                                                                                                                                                     |
|--------|---------------------------|-----------------------------------------------------------------------------------------------------------------------------------------------------------------------------------------------------------------------------------------------------------------------------------------------------|
| Q13177 | PAK2                      | Serine/threonine-protein kinase PAK 2 (EC 2.7.11.1) (Gamma-PAK) (PAK65) (S6/H4 kinase) (p21-activated kinase 2) (PAK-2) (p58) [Cleaved into: PAK-2p27 (p27); PAK-2p34 (p34) (C-t-PAK2)]                                                                                                             |
| Q13188 | STK3 KRS1 MST2            | Serine/threonine-protein kinase 3 (EC 2.7.11.1) (Mammalian STE20-like protein kinase 2) (MST-2) (STE20-like kinase MST2) (Serine/threonine-protein kinase Krs-1) [Cleaved into: Serine/threonine-protein kinase 3 36kDa subunit (MST2/N); Serine/threonine-protein kinase 3 20kDa subunit (MST2/C)] |
| Q13206 | DDX10                     | Probable ATP-dependent RNA helicase DDX10 (EC 3.6.4.13) (DEAD box protein 10)                                                                                                                                                                                                                       |
| Q13216 | ERCC8 CKN1 CSA            | DNA excision repair protein ERCC-8 (Cockayne syndrome WD repeat protein CSA)                                                                                                                                                                                                                        |
| Q13233 | MAP3K1 MAPKKK1 MEKK MEKK1 | Mitogen-activated protein kinase kinase kinase 1 (EC 2.7.11.25) (MAPK/ERK kinase kinase 1) (MEK kinase 1) (MEKK 1)                                                                                                                                                                                  |
| Q13237 | PRKG2 PRKGR2              | cGMP-dependent protein kinase 2 (cGK 2) (cGK2) (EC 2.7.11.12) (cGMP-dependent protein kinase II) (cGKII)                                                                                                                                                                                            |
| Q13242 | SRSF9 SFRS9 SRP30C        | Serine/arginine-rich splicing factor 9 (Pre-mRNA-splicing factor SRp30C) (Splicing factor, arginine/serine-rich 9)                                                                                                                                                                                  |
| Q13243 | SRSF5 HRS SFRS5 SRP40     | Serine/arginine-rich splicing factor 5 (Delayed-early protein HRS) (Pre-mRNA-splicing factor SRP40) (Splicing factor, arginine/serine-rich 5)                                                                                                                                                       |
| Q13247 | SRSF6 SFRS6 SRP55         | Serine/arginine-rich splicing factor 6 (Pre-mRNA-splicing factor SRP55) (Splicing factor, arginine/serine-rich 6)                                                                                                                                                                                   |
| Q13283 | G3BP1 G3BP                | Ras GTPase-activating protein-binding protein 1 (G3BP-1) (EC 3.6.4.12) (EC 3.6.4.13) (ATP-dependent DNA helicase VIII) (hDH VIII) (GAP SH3 domain-binding protein 1)                                                                                                                                |
| Q13310 | PABPC4 APP1 PABP4         | Polyadenylate-binding protein 4 (PABP-4) (Poly(A)-binding protein 4) (Activated-platelet protein 1) (APP-1) (Inducible poly(A)-binding protein) (iPABP)                                                                                                                                             |
| Q13347 | EIF3I EIF3S2 TRIP1        | Eukaryotic translation initiation factor 3 subunit I (eIF3i) (Eukaryotic translation initiation factor 3 subunit 2) (TGF-beta receptor-interacting protein 1) (TRIP-1) (eIF-3-beta) (eIF3 p36)                                                                                                      |
| Q13360 | ZNF177                    | Zinc finger protein 177                                                                                                                                                                                                                                                                             |
| Q13395 | TARBP1 TRM3 TRP185        | Probable methyltransferase TARBP1 (EC 2.1.1.-) (TAR RNA-binding protein 1) (TAR RNA-binding protein of 185 kDa) (TRP-185)                                                                                                                                                                           |
| Q13398 | ZNF211                    | Zinc finger protein 211 (Zinc finger protein C2H2-25)                                                                                                                                                                                                                                               |
| Q13409 | DYNC1I2 DNCI2 DNCIC2      | Cytoplasmic dynein 1 intermediate chain 2 (Cytoplasmic dynein intermediate chain 2)                                                                                                                                                                                                                 |

|        |                                    |                                                                                                                                                                                                                                                                                                                          |
|--------|------------------------------------|--------------------------------------------------------------------------------------------------------------------------------------------------------------------------------------------------------------------------------------------------------------------------------------------------------------------------|
|        |                                    | (Dynein intermediate chain 2, cytosolic) (DH IC-2)                                                                                                                                                                                                                                                                       |
| Q13434 | MKRN4P MKRN4 MKRNP5 RNF64 ZNF127L1 | Putative E3 ubiquitin-protein ligase makorin-4 (EC 6.3.2.-) (Makorin RING finger protein pseudogene 4) (Makorin RING finger protein pseudogene 5) (RING finger protein 64) (Zinc finger protein 127-Xp) (ZNF127-Xp) (Zinc finger protein 127-like 1)                                                                     |
| Q13435 | SF3B2 SAP145                       | Splicing factor 3B subunit 2 (Pre-mRNA-splicing factor SF3b 145 kDa subunit) (SF3b145) (SF3b150) (Spliceosome-associated protein 145) (SAP 145)                                                                                                                                                                          |
| Q13464 | ROCK1                              | Rho-associated protein kinase 1 (EC 2.7.11.1) (Renal carcinoma antigen NY-REN-35) (Rho-associated, coiled-coil-containing protein kinase 1) (Rho-associated, coiled-coil-containing protein kinase I) (ROCK-I) (p160 ROCK-1) (p160ROCK)                                                                                  |
| Q13487 | SNAPC2 SNAP45                      | snRNA-activating protein complex subunit 2 (SNAPc subunit 2) (Proximal sequence element-binding transcription factor subunit delta) (PSE-binding factor subunit delta) (PTF subunit delta) (Small nuclear RNA-activating complex polypeptide 2) (snRNA-activating protein complex 45 kDa subunit) (SNAPc 45 kDa subunit) |
| Q13541 | EIF4EBP1                           | Eukaryotic translation initiation factor 4E-binding protein 1 (4E-BP1) (eIF4E-binding protein 1) (Phosphorylated heat- and acid-stable protein regulated by insulin 1) (PHAS-I)                                                                                                                                          |
| Q13542 | EIF4EBP2                           | Eukaryotic translation initiation factor 4E-binding protein 2 (4E-BP2) (eIF4E-binding protein 2)                                                                                                                                                                                                                         |
| Q13546 | RIPK1 RIP RIP1                     | Receptor-interacting serine/threonine-protein kinase 1 (EC 2.7.11.1) (Cell death protein RIP) (Receptor-interacting protein 1) (RIP-1) (Serine/threonine-protein kinase RIP)                                                                                                                                             |
| Q13554 | CAMK2B CAM2 CAMK2 CAMKB            | Calcium/calmodulin-dependent protein kinase type II subunit beta (CaM kinase II subunit beta) (CaMK-II subunit beta) (EC 2.7.11.17)                                                                                                                                                                                      |
| Q13555 | CAMK2G CAMK CAMK-II CAMKG          | Calcium/calmodulin-dependent protein kinase type II subunit gamma (CaM kinase II subunit gamma) (CaMK-II subunit gamma) (EC 2.7.11.17)                                                                                                                                                                                   |
| Q13557 | CAMK2D CAMKD                       | Calcium/calmodulin-dependent protein kinase type II subunit delta (CaM kinase II subunit delta) (CaMK-II subunit delta) (EC 2.7.11.17)                                                                                                                                                                                   |
| Q13568 | IRF5                               | Interferon regulatory factor 5 (IRF-5)                                                                                                                                                                                                                                                                                   |
| Q13595 | TRA2A                              | Transformer-2 protein homolog alpha (TRA-2 alpha) (TRA2-alpha) (Transformer-2 protein homolog A)                                                                                                                                                                                                                         |
| Q13610 | PWP1                               | Periodic tryptophan protein 1 homolog (Keratinocyte protein IEF SSP 9502)                                                                                                                                                                                                                                                |



|        |                                        |                                                                                                                                                                                                                                     |
|--------|----------------------------------------|-------------------------------------------------------------------------------------------------------------------------------------------------------------------------------------------------------------------------------------|
| Q13627 | DYRK1A DYRK MNB MNBH                   | Dual specificity tyrosine-phosphorylation-regulated kinase 1A (EC 2.7.12.1) (Dual specificity YAK1-related kinase) (HP86) (Protein kinase minibrain homolog) (MNBH) (hMNB)                                                          |
| Q13641 | TPBG 5T4                               | Trophoblast glycoprotein (5T4 oncofetal antigen) (5T4 oncofetal trophoblast glycoprotein) (5T4 oncotrophoblast glycoprotein) (M6P1) (Wnt-activated inhibitory factor 1) (WAI1)                                                      |
| Q13685 | AAMP                                   | Angio-associated migratory cell protein                                                                                                                                                                                             |
| Q13823 | GNL2 NGP1                              | Nucleolar GTP-binding protein 2 (Autoantigen NGP-1)                                                                                                                                                                                 |
| Q13838 | DDX39B BAT1 UAP56                      | Spliceosome RNA helicase DDX39B (EC 3.6.4.13) (56 kDa U2AF65-associated protein) (ATP-dependent RNA helicase p47) (DEAD box protein UAP56) (HLA-B-associated transcript 1 protein)                                                  |
| Q13868 | EXOSC2 RRP4                            | Exosome complex component RRP4 (Exosome component 2) (Ribosomal RNA-processing protein 4)                                                                                                                                           |
| Q13895 | BYSL                                   | Bystin                                                                                                                                                                                                                              |
| Q13901 | C1D                                    | Nuclear nucleic acid-binding protein C1D (hC1D)                                                                                                                                                                                     |
| Q13976 | PRKG1 PRKG1B PRKGR1A PRKGR1B           | cGMP-dependent protein kinase 1 (cGK 1) (cGK1) (EC 2.7.11.12) (cGMP-dependent protein kinase I) (cGKI)                                                                                                                              |
| Q14004 | CDK13 CDC2L CDC2L5 CHED KIAA1791       | Cyclin-dependent kinase 13 (EC 2.7.11.22) (EC 2.7.11.23) (CDC2-related protein kinase 5) (Cell division cycle 2-like protein kinase 5) (Cell division protein kinase 13) (hCDK13) (Cholinesterase-related cell division controller) |
| Q14011 | CIRBP A18HNRNP CIRP                    | Cold-inducible RNA-binding protein (A18 hnRNP) (Glycine-rich RNA-binding protein CIRP)                                                                                                                                              |
| Q14012 | CAMK1                                  | Calcium/calmodulin-dependent protein kinase type 1 (EC 2.7.11.17) (CaM kinase I) (CaM-KI) (CaM kinase I alpha) (CaMKI-alpha)                                                                                                        |
| Q14103 | HNRNPD AUF1 HNRPD                      | Heterogeneous nuclear ribonucleoprotein D0 (hnRNP D0) (AU-rich element RNA-binding protein 1)                                                                                                                                       |
| Q14137 | BOP1 KIAA0124                          | Ribosome biogenesis protein BOP1 (Block of proliferation 1 protein)                                                                                                                                                                 |
| Q14147 | DHX34 DDX34 KIAA0134                   | Probable ATP-dependent RNA helicase DHX34 (EC 3.6.4.13) (DEAH box protein 34)                                                                                                                                                       |
| Q14151 | SAFB2 KIAA0138                         | Scaffold attachment factor B2 (SAF-B2)                                                                                                                                                                                              |
| Q14152 | EIF3A EIF3S10 KIAA0139                 | Eukaryotic translation initiation factor 3 subunit A (eIF3a) (Eukaryotic translation initiation factor 3 subunit 10) (eIF-3-theta) (eIF3 p167) (eIF3 p180) (eIF3 p185)                                                              |
| Q14160 | SCRIB CRIB1 KIAA0147 LAP4 SCRB1 VARTUL | Protein scribble homolog (Scribble) (hScrib) (Protein LAP4)                                                                                                                                                                         |
| Q14191 | WRN RECQ3 RECQL2                       | Werner syndrome ATP-dependent helicase (EC 3.6.4.12) (DNA helicase, RecQ-like type 3) (RecQ3) (Exonuclease WRN) (EC                                                                                                                 |

|        |                                     |                                                                                                                                                                                                                                                                                                                                                                                                                                                              |
|--------|-------------------------------------|--------------------------------------------------------------------------------------------------------------------------------------------------------------------------------------------------------------------------------------------------------------------------------------------------------------------------------------------------------------------------------------------------------------------------------------------------------------|
|        |                                     | 3.1.-.-) (RecQ protein-like 2)                                                                                                                                                                                                                                                                                                                                                                                                                               |
| Q14197 | ICT1 DS1                            | Peptidyl-tRNA hydrolase ICT1, mitochondrial (EC 3.1.1.29) (39S ribosomal protein L58, mitochondrial) (MRP-L58) (Digestion subtraction 1) (DS-1) (Immature colon carcinoma transcript 1 protein)                                                                                                                                                                                                                                                              |
| Q14232 | EIF2B1 EIF2BA                       | Translation initiation factor eIF-2B subunit alpha (eIF-2B GDP-GTP exchange factor subunit alpha)                                                                                                                                                                                                                                                                                                                                                            |
| Q14240 | EIF4A2 DDX2B EIF4F                  | Eukaryotic initiation factor 4A-II (eIF-4A-II) (eIF4A-II) (EC 3.6.4.13) (ATP-dependent RNA helicase eIF4A-2) [Cleaved into: Eukaryotic initiation factor 4A-II, N-terminally processed]                                                                                                                                                                                                                                                                      |
| Q14392 | LRRC32 D11S833E GARP                | Leucine-rich repeat-containing protein 32 (Garpin) (Glycoprotein A repetitions predominant) (GARP)                                                                                                                                                                                                                                                                                                                                                           |
| Q14444 | CAPRIN1 GPIAP1 GPIP137 M11S1 RNG105 | Caprin-1 (Cell cycle-associated protein 1) (Cytoplasmic activation- and proliferation-associated protein 1) (GPI-anchored membrane protein 1) (GPI-anchored protein p137) (GPI-p137) (p137GPI) (Membrane component chromosome 11 surface marker 1) (RNA granule protein 105)                                                                                                                                                                                 |
| Q14493 | SLBP HBP                            | Histone RNA hairpin-binding protein (Histone stem-loop-binding protein)                                                                                                                                                                                                                                                                                                                                                                                      |
| Q14498 | RBM39 HCC1 RNPC2                    | RNA-binding protein 39 (CAPER alpha) (Hepatocellular carcinoma protein 1) (RNA-binding motif protein 39) (RNA-binding region-containing protein 2) (Splicing factor HCC1)                                                                                                                                                                                                                                                                                    |
| Q14520 | HABP2 HGFAL PHBP                    | Hyaluronan-binding protein 2 (EC 3.4.21.-) (Factor VII-activating protease) (Factor seven-activating protease) (FSAP) (Hepatocyte growth factor activator-like protein) (Plasma hyaluronan-binding protein) [Cleaved into: Hyaluronan-binding protein 2 50 kDa heavy chain; Hyaluronan-binding protein 2 50 kDa heavy chain alternate form; Hyaluronan-binding protein 2 27 kDa light chain; Hyaluronan-binding protein 2 27 kDa light chain alternate form] |
| Q14526 | HIC1 ZBTB29                         | Hypermethylated in cancer 1 protein (Hic-1) (Zinc finger and BTB domain-containing protein 29)                                                                                                                                                                                                                                                                                                                                                               |
| Q14562 | DHX8 DDX8                           | ATP-dependent RNA helicase DHX8 (EC 3.6.4.13) (DEAH box protein 8) (RNA helicase HRH1)                                                                                                                                                                                                                                                                                                                                                                       |
| Q14576 | ELAVL3 HUC PLE21                    | ELAV-like protein 3 (Hu-antigen C) (HuC) (Paraneoplastic cerebellar degeneration-associated antigen) (Paraneoplastic limbic encephalitis antigen 21)                                                                                                                                                                                                                                                                                                         |
| Q14584 | ZNF266 KIAA2007                     | Zinc finger protein 266 (Zinc finger protein HZF1)                                                                                                                                                                                                                                                                                                                                                                                                           |
| Q14585 | ZNF345                              | Zinc finger protein 345 (Zinc finger protein HZF10)                                                                                                                                                                                                                                                                                                                                                                                                          |
| Q14586 | ZNF267                              | Zinc finger protein 267 (Zinc finger protein                                                                                                                                                                                                                                                                                                                                                                                                                 |

|        |                             |                                                                                                                                                                                                                                             |
|--------|-----------------------------|---------------------------------------------------------------------------------------------------------------------------------------------------------------------------------------------------------------------------------------------|
|        |                             | HZF2)                                                                                                                                                                                                                                       |
| Q14587 | ZNF268                      | Zinc finger protein 268 (Zinc finger protein HZF3)                                                                                                                                                                                          |
| Q14588 | ZNF234 ZNF269               | Zinc finger protein 234 (Zinc finger protein 269) (Zinc finger protein HZF4)                                                                                                                                                                |
| Q14590 | ZNF235 ZFP93 ZNF270         | Zinc finger protein 235 (Zinc finger protein 270) (Zinc finger protein 93 homolog) (Zfp-93) (Zinc finger protein HZF6)                                                                                                                      |
| Q14591 |                             | Deleted.                                                                                                                                                                                                                                    |
| Q14592 | ZNF460 ZNF272               | Zinc finger protein 460 (Zinc finger protein 272) (Zinc finger protein HZF8)                                                                                                                                                                |
| Q14593 | ZNF273                      | Zinc finger protein 273 (Zinc finger protein HZF9)                                                                                                                                                                                          |
| Q14653 | IRF3                        | Interferon regulatory factor 3 (IRF-3)                                                                                                                                                                                                      |
| Q14667 | KIAA0100 BCOX1              | Protein KIAA0100 (Antigen MLAA-22) (Breast cancer-overexpressed gene 1 protein)                                                                                                                                                             |
| Q14671 | PUM1 KIAA0099 PUMH1         | Pumilio homolog 1 (HsPUM) (Pumilio-1)                                                                                                                                                                                                       |
| Q14678 | KANK1 ANKRD15 KANK KIAA0172 | KN motif and ankyrin repeat domain-containing protein 1 (Ankyrin repeat domain-containing protein 15) (Kidney ankyrin repeat-containing protein)                                                                                            |
| Q14680 | MELK KIAA0175               | Maternal embryonic leucine zipper kinase (hMELK) (EC 2.7.11.1) (Protein kinase Eg3) (pEg3 kinase) (Protein kinase PK38) (hPK38) (Tyrosine-protein kinase MELK) (EC 2.7.10.2)                                                                |
| Q14684 | RRP1B KIAA0179              | Ribosomal RNA processing protein 1 homolog B (RRP1-like protein B)                                                                                                                                                                          |
| Q14690 | PDCD11 KIAA0185             | Protein RRP5 homolog (NF-kappa-B-binding protein) (NFBP) (Programmed cell death protein 11)                                                                                                                                                 |
| Q147U1 | ZNF846                      | Zinc finger protein 846                                                                                                                                                                                                                     |
| Q14872 | MTF1                        | Metal regulatory transcription factor 1 (MRE-binding transcription factor) (Transcription factor MTF-1)                                                                                                                                     |
| Q14929 | ZNF169                      | Zinc finger protein 169                                                                                                                                                                                                                     |
| Q14966 | ZNF638 NP220 ZFML           | Zinc finger protein 638 (Cutaneous T-cell lymphoma-associated antigen se33-1) (CTCL-associated antigen se33-1) (Nuclear protein 220) (Zinc finger matrin-like protein)                                                                      |
| Q14978 | NOLC1 KIAA0035 NS5ATP13     | Nucleolar and coiled-body phosphoprotein 1 (140 kDa nucleolar phosphoprotein) (Nopp140) (Hepatitis C virus NS5A-transactivated protein 13) (HCV NS5A-transactivated protein 13) (Nucleolar 130 kDa protein) (Nucleolar phosphoprotein p130) |
| Q149M9 | NWD1                        | NACHT domain- and WD repeat-containing protein 1                                                                                                                                                                                            |
| Q14CZ7 | FASTKD3                     | FAST kinase domain-containing protein 3                                                                                                                                                                                                     |
| Q15020 | SART3 KIAA0156 TIP110       | Squamous cell carcinoma antigen recognized by T-cells 3 (SART-3) (Tat-interacting protein of 110 kDa) (Tip110) (p110 nuclear RNA-binding protein)                                                                                           |
| Q15024 | EXOSC7 KIAA0116 RRP42       | Exosome complex component RRP42                                                                                                                                                                                                             |

|        |                             |                                                                                                                                                                                                                                                                                     |
|--------|-----------------------------|-------------------------------------------------------------------------------------------------------------------------------------------------------------------------------------------------------------------------------------------------------------------------------------|
|        |                             | (Exosome component 7) (Ribosomal RNA-processing protein 42) (p8)                                                                                                                                                                                                                    |
| Q15029 | EFTUD2 KIAA0031 SNRP116     | 116 kDa U5 small nuclear ribonucleoprotein component (Elongation factor Tu GTP-binding domain-containing protein 2) (SNU114 homolog) (hSNU114) (U5 snRNP-specific protein, 116 kDa) (U5-116 kDa)                                                                                    |
| Q15031 | LARS2 KIAA0028              | Probable leucine--tRNA ligase, mitochondrial (EC 6.1.1.4) (Leucyl-tRNA synthetase) (LeuRS)                                                                                                                                                                                          |
| Q15046 | KARS KIAA0070               | Lysine--tRNA ligase (EC 6.1.1.6) (Lysyl-tRNA synthetase) (LysRS)                                                                                                                                                                                                                    |
| Q15050 | RRS1 KIAA0112 RRR           | Ribosome biogenesis regulatory protein homolog                                                                                                                                                                                                                                      |
| Q15056 | EIF4H KIAA0038 WBSCR1 WSCR1 | Eukaryotic translation initiation factor 4H (eIF-4H) (Williams-Beuren syndrome chromosomal region 1 protein)                                                                                                                                                                        |
| Q15061 | WDR43 KIAA0007 UTP5         | WD repeat-containing protein 43                                                                                                                                                                                                                                                     |
| Q15072 | ZNF146 OZF                  | Zinc finger protein OZF (Only zinc finger protein) (Zinc finger protein 146)                                                                                                                                                                                                        |
| Q15131 | CDK10                       | Cyclin-dependent kinase 10 (EC 2.7.11.22) (Cell division protein kinase 10) (Serine/threonine-protein kinase PISSLRE)                                                                                                                                                               |
| Q15139 | PRKD1 PKD PKD1 PRKCM        | Serine/threonine-protein kinase D1 (EC 2.7.11.13) (Protein kinase C mu type) (Protein kinase D) (nPKC-D1) (nPKC-mu)                                                                                                                                                                 |
| Q15149 | PLEC PLEC1                  | Plectin (PCN) (PLTN) (Hemidesmosomal protein 1) (HD1) (Plectin-1)                                                                                                                                                                                                                   |
| Q15208 | STK38 NDR1                  | Serine/threonine-protein kinase 38 (EC 2.7.11.1) (NDR1 protein kinase) (Nuclear Dbf2-related kinase 1)                                                                                                                                                                              |
| Q15233 | NONO NRB54                  | Non-POU domain-containing octamer-binding protein (NonO protein) (54 kDa nuclear RNA- and DNA-binding protein) (55 kDa nuclear protein) (DNA-binding p52/p100 complex, 52 kDa subunit) (NMT55) (p54(nrb)) (p54nrb)                                                                  |
| Q15269 | PWP2 PWP2H                  | Periodic tryptophan protein 2 homolog                                                                                                                                                                                                                                               |
| Q15287 | RNPS1 LDC2                  | RNA-binding protein with serine-rich domain 1 (SR-related protein LDC2)                                                                                                                                                                                                             |
| Q15306 | IRF4 MUM1                   | Interferon regulatory factor 4 (IRF-4) (Lymphocyte-specific interferon regulatory factor) (LSIRF) (Multiple myeloma oncogene 1) (NF-EM5)                                                                                                                                            |
| Q15349 | RPS6KA2 MAPKAPK1C RSK3      | Ribosomal protein S6 kinase alpha-2 (S6K-alpha-2) (EC 2.7.11.1) (90 kDa ribosomal protein S6 kinase 2) (p90-RSK 2) (p90RSK2) (MAP kinase-activated protein kinase 1c) (MAPK-activated protein kinase 1c) (MAPKAP kinase 1c) (MAPKAPK-1c) (Ribosomal S6 kinase 3) (RSK-3) (pp90RSK3) |
| Q15365 | PCBP1                       | Poly(rC)-binding protein 1 (Alpha-CP1) (Heterogeneous nuclear ribonucleoprotein E1) (hnRNP E1) (Nucleic acid-binding protein SUB2.3)                                                                                                                                                |
| Q15366 | PCBP2                       | Poly(rC)-binding protein 2 (Alpha-CP2) (Heterogeneous nuclear ribonucleoprotein                                                                                                                                                                                                     |

|        |                            |                                                                                                                                                                                                                                                                                                      |
|--------|----------------------------|------------------------------------------------------------------------------------------------------------------------------------------------------------------------------------------------------------------------------------------------------------------------------------------------------|
|        |                            | E2) (hnRNP E2)                                                                                                                                                                                                                                                                                       |
| Q15393 | SF3B3 KIAA0017 SAP130      | Splicing factor 3B subunit 3 (Pre-mRNA-splicing factor SF3b 130 kDa subunit) (SF3b130) (STAF130) (Spliceosome-associated protein 130) (SAP 130)                                                                                                                                                      |
| Q15399 | TLR1 KIAA0012              | Toll-like receptor 1 (Toll/interleukin-1 receptor-like protein) (TIL) (CD antigen CD281)                                                                                                                                                                                                             |
| Q15415 | RBM1Y1F YRRM2; RBMY1J      | RNA-binding motif protein, Y chromosome, family 1 member F/J (Y chromosome RNA recognition motif 2)                                                                                                                                                                                                  |
| Q15418 | RPS6KA1 MAPKAPK1A RSK1     | Ribosomal protein S6 kinase alpha-1 (S6K-alpha-1) (EC 2.7.11.1) (90 kDa ribosomal protein S6 kinase 1) (p90-RSK 1) (p90RSK1) (p90S6K) (MAP kinase-activated protein kinase 1a) (MAPK-activated protein kinase 1a) (MAPKAP kinase 1a) (MAPKAPK-1a) (Ribosomal S6 kinase 1) (RSK-1)                    |
| Q15424 | SAFB HAP HET SAFB1         | Scaffold attachment factor B1 (SAF-B) (SAF-B1) (HSP27 estrogen response element-TATA box-binding protein) (HSP27 ERE-TATA-binding protein)                                                                                                                                                           |
| Q15427 | SF3B4 SAP49                | Splicing factor 3B subunit 4 (Pre-mRNA-splicing factor SF3b 49 kDa subunit) (SF3b50) (Spliceosome-associated protein 49) (SAP 49)                                                                                                                                                                    |
| Q15434 | RBMS2 SCR3                 | RNA-binding motif, single-stranded-interacting protein 2 (Suppressor of CDC2 with RNA-binding motif 3)                                                                                                                                                                                               |
| Q15459 | SF3A1 SAP114               | Splicing factor 3A subunit 1 (SF3a120) (Spliceosome-associated protein 114) (SAP 114)                                                                                                                                                                                                                |
| Q15477 | SKIV2L DDX13 SKI2W SKIV2 W | Helicase SKI2W (Ski2) (EC 3.6.4.-) (Helicase-like protein) (HLP)                                                                                                                                                                                                                                     |
| Q15542 | TAF5 TAF2D                 | Transcription initiation factor TFIID subunit 5 (Transcription initiation factor TFIID 100 kDa subunit) (TAF(II)100) (TAFII-100) (TAFII100)                                                                                                                                                          |
| Q15569 | TESK1                      | Dual specificity testis-specific protein kinase 1 (EC 2.7.12.1) (Testicular protein kinase 1)                                                                                                                                                                                                        |
| Q15573 | TAF1A                      | TATA box-binding protein-associated factor RNA polymerase I subunit A (RNA polymerase I-specific TBP-associated factor 48 kDa) (TAFI48) (TATA box-binding protein-associated factor 1A) (TBP-associated factor 1A) (Transcription factor SL1) (Transcription initiation factor SL1/TIF-IB subunit A) |
| Q15633 | TARBP2 TRBP                | RISC-loading complex subunit TARBP2 (TAR RNA-binding protein 2) (Trans-activation-responsive RNA-binding protein)                                                                                                                                                                                    |
| Q15637 | SF1 ZFM1 ZNF162            | Splicing factor 1 (Mammalian branch point-binding protein) (BBP) (mBBP) (Transcription factor ZFM1) (Zinc finger gene in MEN1 locus) (Zinc finger protein 162)                                                                                                                                       |

|        |                              |                                                                                                                                                                                                                                                |
|--------|------------------------------|------------------------------------------------------------------------------------------------------------------------------------------------------------------------------------------------------------------------------------------------|
| Q15646 | OASL TRIP14                  | 2'-5'-oligoadenylate synthase-like protein (2'-5'-OAS-related protein) (2'-5'-OAS-RP) (59 kDa 2'-5'-oligoadenylate synthase-like protein) (Thyroid receptor-interacting protein 14) (TR-interacting protein 14) (TRIP-14) (p59 OASL) (p59OASL) |
| Q15650 | TRIP4                        | Activating signal cointegrator 1 (ASC-1) (Thyroid receptor-interacting protein 4) (TR-interacting protein 4) (TRIP-4)                                                                                                                          |
| Q15652 | JMJD1C JHDM2C KIAA1380 TRIP8 | Probable JmjC domain-containing histone demethylation protein 2C (EC 1.14.11.-) (Jumonji domain-containing protein 1C) (Thyroid receptor-interacting protein 8) (TR-interacting protein 8) (TRIP-8)                                            |
| Q15653 | NFKBIB IKBB TRIP9            | NF-kappa-B inhibitor beta (NF-kappa-BIB) (I-kappa-B-beta) (IkB-B) (IkB-beta) (IkappaBbeta) (Thyroid receptor-interacting protein 9) (TR-interacting protein 9) (TRIP-9)                                                                        |
| Q15661 | TPSAB1 TPS1 TPS2 TPSB1       | Tryptase alpha/beta-1 (Tryptase-1) (EC 3.4.21.59) (Tryptase I) (Tryptase alpha-1)                                                                                                                                                              |
| Q15717 | ELAVL1 HUR                   | ELAV-like protein 1 (Hu-antigen R) (HuR)                                                                                                                                                                                                       |
| Q15746 | MYLK MLCK MLCK1 MYLK1        | Myosin light chain kinase, smooth muscle (MLCK) (smMLCK) (EC 2.7.11.18) (Kinase-related protein) (KRP) (Telokin) [Cleaved into: Myosin light chain kinase, smooth muscle, deglutamylated form]                                                 |
| Q15759 | MAPK11 PRKM11 SAPK2 SAPK2B   | Mitogen-activated protein kinase 11 (MAP kinase 11) (MAPK 11) (EC 2.7.11.24) (Mitogen-activated protein kinase p38 beta) (MAP kinase p38 beta) (p38b) (Stress-activated protein kinase 2b) (SAPK2b) (p38-2)                                    |
| Q15772 | SPEG APEG1 KIAA1297          | Striated muscle preferentially expressed protein kinase (EC 2.7.11.1) (Aortic preferentially expressed protein 1) (APEG-1)                                                                                                                     |
| Q15776 | ZKSCAN8 ZNF192               | Zinc finger protein with KRAB and SCAN domains 8 (LD5-1) (Zinc finger protein 192)                                                                                                                                                             |
| Q15831 | STK11 LKB1 PJS               | Serine/threonine-protein kinase STK11 (EC 2.7.11.1) (Liver kinase B1) (LKB1) (hLKB1) (Renal carcinoma antigen NY-REN-19)                                                                                                                       |
| Q15835 | GRK1 RHOK                    | Rhodopsin kinase (RK) (EC 2.7.11.14) (G protein-coupled receptor kinase 1)                                                                                                                                                                     |
| Q15843 | NEDD8                        | NEDD8 (Neddylin) (Neural precursor cell expressed developmentally down-regulated protein 8) (NEDD-8) (Ubiquitin-like protein Nedd8)                                                                                                            |
| Q15915 | ZIC1 ZIC ZNF201              | Zinc finger protein ZIC 1 (Zinc finger protein 201) (Zinc finger protein of the cerebellum 1)                                                                                                                                                  |
| Q15928 | ZNF141 D4S90                 | Zinc finger protein 141                                                                                                                                                                                                                        |
| Q15935 | ZNF77                        | Zinc finger protein 77 (ZNFpT1)                                                                                                                                                                                                                |
| Q15937 | ZNF79                        | Zinc finger protein 79 (ZNFpT7)                                                                                                                                                                                                                |
| Q15973 | ZNF124                       | Zinc finger protein 124 (Zinc finger protein HZF-16)                                                                                                                                                                                           |

|        |                                           |                                                                                                                                                                                                                                                                                                                                             |
|--------|-------------------------------------------|---------------------------------------------------------------------------------------------------------------------------------------------------------------------------------------------------------------------------------------------------------------------------------------------------------------------------------------------|
| Q16512 | PKN1 PAK1 PKN PRK1 PRKCL1                 | Serine/threonine-protein kinase N1 (EC 2.7.11.13) (Protease-activated kinase 1) (PAK-1) (Protein kinase C-like 1) (Protein kinase C-like PKN) (Protein kinase PKN-alpha) (Protein-kinase C-related kinase 1) (Serine-threonine protein kinase N)                                                                                            |
| Q16513 | PKN2 PRK2 PRKCL2                          | Serine/threonine-protein kinase N2 (EC 2.7.11.13) (PKN gamma) (Protein kinase C-like 2) (Protein-kinase C-related kinase 2)                                                                                                                                                                                                                 |
| Q16531 | DDB1 XAP1                                 | DNA damage-binding protein 1 (DDB p127 subunit) (DNA damage-binding protein a) (DDBa) (Damage-specific DNA-binding protein 1) (HBV X-associated protein 1) (XAP-1) (UV-damaged DNA-binding factor) (UV-damaged DNA-binding protein 1) (UV-DDB 1) (XPE-binding factor) (XPE-BF) (Xeroderma pigmentosum group E-complementing protein) (XPCE) |
| Q16539 | MAPK14 CSBP CSBP1 CSBP2 CSPB1 MXI2 SAPK2A | Mitogen-activated protein kinase 14 (MAP kinase 14) (MAPK 14) (EC 2.7.11.24) (Cytokine suppressive anti-inflammatory drug-binding protein) (CSAID-binding protein) (CSBP) (MAP kinase MXI2) (MAX-interacting protein 2) (Mitogen-activated protein kinase p38 alpha) (MAP kinase p38 alpha) (Stress-activated protein kinase 2a) (SAPK2a)   |
| Q16560 | SNRNP35 HM1 U1SNRNPBP                     | U11/U12 small nuclear ribonucleoprotein 35 kDa protein (U11/U12 snRNP 35 kDa protein) (U11/U12-35K) (Protein HM-1) (U1 snRNP-binding protein homolog)                                                                                                                                                                                       |
| Q16566 | CAMK4 CAMK CAMK-GR CAMKIV                 | Calcium/calmodulin-dependent protein kinase type IV (CaMK IV) (EC 2.7.11.17) (CaM kinase-GR)                                                                                                                                                                                                                                                |
| Q16576 | RBBP7 RBAP46                              | Histone-binding protein RBBP7 (Histone acetyltransferase type B subunit 2) (Nucleosome-remodeling factor subunit RBAP46) (Retinoblastoma-binding protein 7) (RBBP-7) (Retinoblastoma-binding protein p46)                                                                                                                                   |
| Q16584 | MAP3K11 MLK3 PTK1 SPRK                    | Mitogen-activated protein kinase kinase kinase 11 (EC 2.7.11.25) (Mixed lineage kinase 3) (Src-homology 3 domain-containing proline-rich kinase)                                                                                                                                                                                            |
| Q16600 | ZNF239 HOK2 MOK2                          | Zinc finger protein 239 (Zinc finger protein HOK-2) (Zinc finger protein MOK-2)                                                                                                                                                                                                                                                             |
| Q16625 | OCLN                                      | Occludin                                                                                                                                                                                                                                                                                                                                    |
| Q16629 | SRSF7 SFRS7                               | Serine/arginine-rich splicing factor 7 (Splicing factor 9G8) (Splicing factor, arginine/serine-rich 7)                                                                                                                                                                                                                                      |
| Q16630 | CPSF6 CFIM68                              | Cleavage and polyadenylation specificity factor subunit 6 (Cleavage and polyadenylation specificity factor 68 kDa subunit) (CFIm68) (CPSF 68 kDa subunit) (Pre-mRNA cleavage factor Im 68 kDa subunit) (Protein HPBRII-4/7)                                                                                                                 |
| Q16637 | SMN1 SMN SMNT; SMN2 SMNC                  | Survival motor neuron protein (Component                                                                                                                                                                                                                                                                                                    |

|        |                             |                                                                                                                                                                                                                      |
|--------|-----------------------------|----------------------------------------------------------------------------------------------------------------------------------------------------------------------------------------------------------------------|
|        |                             | of gems 1) (Gemin-1)                                                                                                                                                                                                 |
| Q16644 | MAPKAPK3                    | MAP kinase-activated protein kinase 3 (MAPK-activated protein kinase 3) (MAPKAP kinase 3) (MAPKAP-K3) (MAPKAPK-3) (MK-3) (EC 2.7.11.1) (Chromosome 3p kinase) (3pK)                                                  |
| Q16651 | PRSS8                       | Prostasin (EC 3.4.21.-) (Channel-activating protease 1) (CAP1) (Serine protease 8) [Cleaved into: Prostasin light chain; Prostasin heavy chain]                                                                      |
| Q16816 | PHKG1 PHKG                  | Phosphorylase b kinase gamma catalytic chain, skeletal muscle/heart isoform (PHK-gamma-M) (EC 2.7.11.19) (Phosphorylase kinase subunit gamma-1) (Serine/threonine-protein kinase PHKG1) (EC 2.7.11.1) (EC 2.7.11.26) |
| Q17RB8 | LONRF1 RNF191               | LON peptidase N-terminal domain and RING finger protein 1 (RING finger protein 191)                                                                                                                                  |
| Q17RY0 | CPEB4 KIAA1673              | Cytoplasmic polyadenylation element-binding protein 4 (CPE-BP4) (CPE-binding protein 4) (hCPEB-4)                                                                                                                    |
| Q2I0M4 | LRRC26 CAPC                 | Leucine-rich repeat-containing protein 26 (BK channel auxiliary gamma subunit LRRC26) (Cytokeratin-associated protein in cancer)                                                                                     |
| Q2L4Q9 | PRSS53                      | Serine protease 53 (EC 3.4.21.-) (Polyserine protease 3) (Polyserase-3)                                                                                                                                              |
| Q2M1K9 | ZNF423 KIAA0760 NPHP14 OAZ  | Zinc finger protein 423 (Olf1/EBF-associated zinc finger protein) (hOAZ) (Smad- and Olf-interacting zinc finger protein)                                                                                             |
| Q2M3G0 | ABCB5                       | ATP-binding cassette sub-family B member 5 (ABCB5 P-gp) (P-glycoprotein ABCB5)                                                                                                                                       |
| Q2M3W8 | ZNF181                      | Zinc finger protein 181 (HHZ181)                                                                                                                                                                                     |
| Q2M3X9 | ZNF674                      | Zinc finger protein 674                                                                                                                                                                                              |
| Q2QGD7 | ZXDC ZXDL                   | Zinc finger protein ZXDC (ZXD-like zinc finger protein)                                                                                                                                                              |
| Q2TAY7 | SMU1                        | WD40 repeat-containing protein SMU1 (Smu-1 suppressor of mec-8 and unc-52 protein homolog) [Cleaved into: WD40 repeat-containing protein SMU1, N-terminally processed]                                               |
| Q2TBE0 | CWF19L2                     | CWF19-like protein 2                                                                                                                                                                                                 |
| Q2TV78 | MST1L D1F15S1A MST1P9 MSTP9 | Putative macrophage stimulating 1-like protein (Brain rescue factor 1) (BRF-1) (Hepatocyte growth factor-like protein homolog)                                                                                       |
| Q2VIR3 | EIF2S3L                     | Putative eukaryotic translation initiation factor 2 subunit 3-like protein (Eukaryotic translation initiation factor 2 subunit gamma A) (eIF-2-gamma A) (eIF-2gA)                                                    |
| Q32M78 | ZNF699                      | Zinc finger protein 699 (Hangover homolog)                                                                                                                                                                           |
| Q32MK0 | MYLK3 MLCK                  | Myosin light chain kinase 3 (EC 2.7.11.18) (Cardiac-MyBP-C-associated Ca/CaM kinase) (Cardiac-MLCK)                                                                                                                  |



|        |                                    |                                                                                                                                                                                                                                                                                               |
|--------|------------------------------------|-----------------------------------------------------------------------------------------------------------------------------------------------------------------------------------------------------------------------------------------------------------------------------------------------|
| Q32P41 | TRMT5 KIAA1393 TRM5                | tRNA (guanine(37)-N1)-methyltransferase (EC 2.1.1.228) (M1G-methyltransferase) (tRNA [GM37] methyltransferase) (tRNA methyltransferase 5 homolog)                                                                                                                                             |
| Q32P44 | EML3                               | Echinoderm microtubule-associated protein-like 3 (EMAP-3)                                                                                                                                                                                                                                     |
| Q32P51 | HNRNPA1L2 HNRNPA1L                 | Heterogeneous nuclear ribonucleoprotein A1-like 2 (hnRNP A1-like 2) (hnRNP core protein A1-like 2)                                                                                                                                                                                            |
| Q3KNS6 | ZNF829                             | Zinc finger protein 829                                                                                                                                                                                                                                                                       |
| Q3KP31 | ZNF791                             | Zinc finger protein 791                                                                                                                                                                                                                                                                       |
| Q3KP44 | ANKRD55                            | Ankyrin repeat domain-containing protein 55                                                                                                                                                                                                                                                   |
| Q3KQV3 | ZNF792                             | Zinc finger protein 792                                                                                                                                                                                                                                                                       |
| Q3MHD2 | LSM12                              | Protein LSM12 homolog                                                                                                                                                                                                                                                                         |
| Q3MIS6 | ZNF528 KIAA1827                    | Zinc finger protein 528                                                                                                                                                                                                                                                                       |
| Q3MIX3 | ADCK5                              | Uncharacterized aarF domain-containing protein kinase 5 (EC 2.7.11.-)                                                                                                                                                                                                                         |
| Q3MJ13 | WDR72                              | WD repeat-containing protein 72                                                                                                                                                                                                                                                               |
| Q3SXZ3 | ZNF718                             | Zinc finger protein 718                                                                                                                                                                                                                                                                       |
| Q3SY52 | ZIK1 ZNF762                        | Zinc finger protein interacting with ribonucleoprotein K (Zinc finger protein 762)                                                                                                                                                                                                            |
| Q3SY69 | ALDH1L2                            | Mitochondrial 10-formyltetrahydrofolate dehydrogenase (Mitochondrial 10-FTHFDH) (mtFDH) (EC 1.5.1.6) (Aldehyde dehydrogenase family 1 member L2)                                                                                                                                              |
| Q3ZCT1 | ZNF260 ZFP260                      | Zinc finger protein 260 (Zfp-260)                                                                                                                                                                                                                                                             |
| Q3ZCX4 | ZNF568                             | Zinc finger protein 568                                                                                                                                                                                                                                                                       |
| Q494X3 | ZNF404                             | Zinc finger protein 404                                                                                                                                                                                                                                                                       |
| Q495B1 | ANKDD1A                            | Ankyrin repeat and death domain-containing protein 1A                                                                                                                                                                                                                                         |
| Q499Z4 | ZNF672                             | Zinc finger protein 672                                                                                                                                                                                                                                                                       |
| Q4G0J3 | LARP7 HDCMA18P                     | La-related protein 7 (La ribonucleoprotein domain family member 7) (P-TEFb-interaction protein for 7SK stability) (PIP7S)                                                                                                                                                                     |
| Q4LE39 | ARID4B BRCA1 RBBP1L1 RBP1L1 SAP180 | AT-rich interactive domain-containing protein 4B (ARID domain-containing protein 4B) (180 kDa Sin3-associated polypeptide) (Sin3-associated polypeptide p180) (Breast cancer-associated antigen BRCA1) (Histone deacetylase complex subunit SAP180) (Retinoblastoma-binding protein 1-like 1) |
| Q4U2R6 | MRPL51 MRP64 CDA09 HSPC241         | 39S ribosomal protein L51, mitochondrial (L51mt) (MRP-L51) (bMRP-64) (bMRP64)                                                                                                                                                                                                                 |
| Q4UJ75 | ANKRD20A4                          | Ankyrin repeat domain-containing protein 20A4                                                                                                                                                                                                                                                 |
| Q4V348 | ZNF658B                            | Zinc finger protein 658B                                                                                                                                                                                                                                                                      |
| Q4VXU2 | PABPC1L C20orf119                  | Polyadenylate-binding protein 1-like                                                                                                                                                                                                                                                          |
| Q504Q3 | PAN2 KIAA0710 USP52                | PAB-dependent poly(A)-specific ribonuclease subunit PAN2 (hPan2) (EC                                                                                                                                                                                                                          |

|        |                     |                                                                                                                                                                                       |
|--------|---------------------|---------------------------------------------------------------------------------------------------------------------------------------------------------------------------------------|
|        |                     | 3.1.13.4) (Inactive ubiquitin carboxyl-terminal hydrolase 52) (PAB1P-dependent poly(A)-nuclease) (PAN deadenylation complex catalytic subunit 2)                                      |
| Q50LG9 | LRRC24              | Leucine-rich repeat-containing protein 24                                                                                                                                             |
| Q52M93 | ZNF585B             | Zinc finger protein 585B (zinc finger protein 41-like protein)                                                                                                                        |
| Q52WX2 | SBK1                | Serine/threonine-protein kinase SBK1 (EC 2.7.11.1) (SH3-binding kinase 1)                                                                                                             |
| Q53GS7 | GLE1 GLE1L          | Nucleoporin GLE1 (hGLE1) (GLE1-like protein)                                                                                                                                          |
| Q53HC9 | TSSC1               | Protein TSSC1 (Tumor-suppressing STF cDNA 1 protein) (Tumor-suppressing subchromosomal transferable fragment candidate gene 1 protein)                                                |
| Q53R41 | FASTKD1 KIAA1800    | FAST kinase domain-containing protein 1                                                                                                                                               |
| Q562E7 | WDR81               | WD repeat-containing protein 81                                                                                                                                                       |
| Q569K4 | ZNF385B ZNF533      | Zinc finger protein 385B (Zinc finger protein 533)                                                                                                                                    |
| Q56UN5 | MAP3K19 RCK YSK4    | Mitogen-activated protein kinase kinase kinase 19 (EC 2.7.11.1) (Regulated in COPD, protein kinase) (SPS1/STE20-related protein kinase YSK4)                                          |
| Q58WW2 | DCAF6 IQWD1 MSTP055 | DDB1- and CUL4-associated factor 6 (Androgen receptor complex-associated protein) (ARCAP) (IQ motif and WD repeat-containing protein 1) (Nuclear receptor interaction protein) (NRIP) |
| Q59GN2 | RPL39P5             | Putative 60S ribosomal protein L39-like 5 (60S ribosomal protein L39 pseudogene 5)                                                                                                    |
| Q59H18 | TNNI3K CARK         | Serine/threonine-protein kinase TNNI3K (EC 2.7.11.1) (Cardiac ankyrin repeat kinase) (Cardiac troponin I-interacting kinase) (TNNI3-interacting kinase)                               |
| Q5C9Z4 | NOM1 C7orf3         | Nucleolar MIF4G domain-containing protein 1 (SGD1 homolog)                                                                                                                            |
| Q5CZ79 | ANKRD20A8P ANKRD20B | Ankyrin repeat domain-containing protein 20B (Ankyrin repeat domain-containing protein 20A pseudogene)                                                                                |
| Q5CZA5 | ZNF805              | Zinc finger protein 805                                                                                                                                                               |
| Q5D0E6 | DALRD3              | DALR anticodon-binding domain-containing protein 3                                                                                                                                    |
| Q5EBL2 | ZNF628              | Zinc finger protein 628                                                                                                                                                               |
| Q5F1R6 | DNAJC21 DNAJA5      | DnaJ homolog subfamily C member 21 (DnaJ homolog subfamily A member 5) (Protein GS3)                                                                                                  |
| Q5H9K5 | ZMAT1 KIAA1789      | Zinc finger matrin-type protein 1                                                                                                                                                     |
| Q5H9U9 | DDX60L              | Probable ATP-dependent RNA helicase DDX60-like (EC 3.6.4.13) (DEAD box protein 60-like)                                                                                               |
| Q5HYK9 | ZNF667              | Zinc finger protein 667                                                                                                                                                               |
| Q5JNZ3 | ZNF311 ZFP31        | Zinc finger protein 311 (Zinc finger protein zfp-31)                                                                                                                                  |
| Q5JPF3 | ANKRD36C            | Ankyrin repeat domain-containing protein 36C (Protein immuno-reactive with anti-PTH polyclonal antibodies)                                                                            |
| Q5JPH6 | EARS2 KIAA1970      | Probable glutamate--tRNA ligase,                                                                                                                                                      |

|        |                                                         |                                                                                                                                                                                                                                                                                               |
|--------|---------------------------------------------------------|-----------------------------------------------------------------------------------------------------------------------------------------------------------------------------------------------------------------------------------------------------------------------------------------------|
|        |                                                         | mitochondrial (EC 6.1.1.17) (Glutamyl-tRNA synthetase) (GluRS)                                                                                                                                                                                                                                |
| Q5JQF8 | PABPC1L2A PABPC1L2 RBM32A;<br>PABPC1L2B PABPC1L2 RBM32B | Polyadenylate-binding protein 1-like 2 (RNA-binding motif protein 32) (RNA-binding protein 32)                                                                                                                                                                                                |
| Q5JSH3 | WDR44                                                   | WD repeat-containing protein 44 (Rabphilin-11)                                                                                                                                                                                                                                                |
| Q5JTH9 | RRP12 KIAA0690                                          | RRP12-like protein                                                                                                                                                                                                                                                                            |
| Q5JTN6 | WDR38                                                   | WD repeat-containing protein 38                                                                                                                                                                                                                                                               |
| Q5JTZ9 | AARS2 AARSL KIAA1270                                    | Alanine--tRNA ligase, mitochondrial (EC 6.1.1.7) (Alanyl-tRNA synthetase) (AlaRS)                                                                                                                                                                                                             |
| Q5JVG2 | ZNF484                                                  | Zinc finger protein 484                                                                                                                                                                                                                                                                       |
| Q5JVG8 | ZNF506                                                  | Zinc finger protein 506                                                                                                                                                                                                                                                                       |
| Q5JVS0 | HABP4                                                   | Intracellular hyaluronan-binding protein 4 (IHABP-4) (IHABP4) (Ki-1/57 intracellular antigen)                                                                                                                                                                                                 |
| Q5K4E3 | PRSS36                                                  | Polyserase-2 (EC 3.4.21.-) (Polyserine protease 2) (Serine protease 36)                                                                                                                                                                                                                       |
| Q5MAI5 | CDKL4                                                   | Cyclin-dependent kinase-like 4 (EC 2.7.11.22)                                                                                                                                                                                                                                                 |
| Q5MCW4 | ZNF569                                                  | Zinc finger protein 569                                                                                                                                                                                                                                                                       |
| Q5QJE6 | DNTTIP2 ERBP TDIF2                                      | Deoxynucleotidyltransferase terminal-interacting protein 2 (Estrogen receptor-binding protein) (LPTS-interacting protein 2) (LPTS-RP2) (Terminal deoxynucleotidyltransferase-interacting factor 2) (TdIF2) (TdT-interacting factor 2)                                                         |
| Q5QP82 | DCAF10 WDR32                                            | DDB1- and CUL4-associated factor 10 (WD repeat-containing protein 32)                                                                                                                                                                                                                         |
| Q5RKV6 | EXOSC6 MTR3                                             | Exosome complex component MTR3 (Exosome component 6) (mRNA transport regulator 3 homolog) (hMtr3) (p11)                                                                                                                                                                                       |
| Q5S007 | LRRK2 PARK8                                             | Leucine-rich repeat serine/threonine-protein kinase 2 (EC 2.7.11.1) (Dardarin)                                                                                                                                                                                                                |
| Q5SQ80 | ANKRD20A2                                               | Ankyrin repeat domain-containing protein 20A2                                                                                                                                                                                                                                                 |
| Q5ST30 | VARS2 KIAA1885 VARS2L VARSL                             | Valine--tRNA ligase, mitochondrial (EC 6.1.1.9) (Valyl-tRNA synthetase) (ValRS) (Valyl-tRNA synthetase-like)                                                                                                                                                                                  |
| Q5SXM1 | ZNF678                                                  | Zinc finger protein 678                                                                                                                                                                                                                                                                       |
| Q5SY16 | NOL9                                                    | Polynucleotide 5'-hydroxyl-kinase NOL9 (EC 2.7.1.-) (Nucleolar protein 9)                                                                                                                                                                                                                     |
| Q5SZQ8 | CELF3 BRUNOL1 CAGH4 ERDA4<br>TNRC4                      | CUGBP Elav-like family member 3 (CELF-3) (Bruno-like protein 1) (CAG repeat protein 4) (CUG-BP- and ETR-3-like factor 3) (ELAV-type RNA-binding protein 1) (ETR-1) (Expanded repeat domain protein CAG/CTG 4) (RNA-binding protein BRUNOL-1) (Trinucleotide repeat-containing gene 4 protein) |
| Q5T160 | RARS2 RARSL                                             | Probable arginine--tRNA ligase, mitochondrial (EC 6.1.1.19) (Arginyl-tRNA synthetase) (ArgRS)                                                                                                                                                                                                 |
| Q5T1V6 | DDX59 ZNHIT5                                            | Probable ATP-dependent RNA helicase DDX59 (EC 3.6.4.13) (DEAD box protein 59) (Zinc finger HIT domain-containing protein 5)                                                                                                                                                                   |

|        |                           |                                                                                                                                                                                             |
|--------|---------------------------|---------------------------------------------------------------------------------------------------------------------------------------------------------------------------------------------|
| Q5T280 | C9orf114 CENP-32          | Putative methyltransferase C9orf114 (EC 2.1.1.-)                                                                                                                                            |
| Q5T5J6 | SWT1 C1orf26              | Transcriptional protein SWT1                                                                                                                                                                |
| Q5T619 | ZNF648                    | Zinc finger protein 648                                                                                                                                                                     |
| Q5T653 | MRPL2 CGI-22              | 39S ribosomal protein L2, mitochondrial (L2mt) (MRP-L2)                                                                                                                                     |
| Q5T7N3 | KANK4 ANKRD38             | KN motif and ankyrin repeat domain-containing protein 4 (Ankyrin repeat domain-containing protein 38)                                                                                       |
| Q5T8I3 | FAM102B                   | Protein FAM102B                                                                                                                                                                             |
| Q5T8I9 | HENMT1 C1orf59            | Small RNA 2'-O-methyltransferase (EC 2.1.1.n8) (HEN1 methyltransferase homolog 1)                                                                                                           |
| Q5T8P6 | RBM26 C13orf10 PRO1777    | RNA-binding protein 26 (CTCL tumor antigen se70-2) (RNA-binding motif protein 26)                                                                                                           |
| Q5T9C2 | FAM102A C9orf132 EEIG1    | Protein FAM102A (Early estrogen-induced gene 1 protein)                                                                                                                                     |
| Q5TA45 | CPSF3L INTS11 RC68        | Integrator complex subunit 11 (Int11) (EC 3.1.27.-) (Cleavage and polyadenylation-specific factor 3-like protein) (CPSF3-like protein) (Protein related to CPSF subunits of 68 kDa) (RC-68) |
| Q5TAP6 | UTP14C KIAA0266           | U3 small nucleolar RNA-associated protein 14 homolog C                                                                                                                                      |
| Q5TAQ9 | DCAF8 H326 WDR42A         | DDB1- and CUL4-associated factor 8 (WD repeat-containing protein 42A)                                                                                                                       |
| Q5TAX3 | ZCCHC11 KIAA0191 TUT4     | Terminal uridylyltransferase 4 (TUTase 4) (EC 2.7.7.52) (Zinc finger CCHC domain-containing protein 11)                                                                                     |
| Q5TBB1 | RNASEH2B DLEU8            | Ribonuclease H2 subunit B (RNase H2 subunit B) (Aicardi-Goutieres syndrome 2 protein) (AGS2) (Deleted in lymphocytic leukemia 8) (Ribonuclease HI subunit B)                                |
| Q5TC82 | RC3H1 KIAA2025 RNF198     | Roquin-1 (Roquin) (RING finger and C3H zinc finger protein 1) (RING finger and CCCH-type zinc finger domain-containing protein 1) (RING finger protein 198)                                 |
| Q5TEC3 | ZNF697                    | Zinc finger protein 697                                                                                                                                                                     |
| Q5TFQ8 | SIRPB1                    | Signal-regulatory protein beta-1 isoform 3 (SIRP-beta-1 isoform 3)                                                                                                                          |
| Q5TYW1 | ZNF658                    | Zinc finger protein 658                                                                                                                                                                     |
| Q5TYW2 | ANKRD20A1 ANKRD20A        | Ankyrin repeat domain-containing protein 20A1                                                                                                                                               |
| Q5U5Q3 | MEX3C RKHD2 RNF194 BM-013 | RNA-binding E3 ubiquitin-protein ligase MEX3C (EC 6.3.2.-) (RING finger and KH domain-containing protein 2) (RING finger protein 194)                                                       |
| Q5UIP0 | RIF1                      | Telomere-associated protein RIF1 (Rap1-interacting factor 1 homolog)                                                                                                                        |
| Q5VIY5 | ZNF468                    | Zinc finger protein 468                                                                                                                                                                     |
| Q5VST9 | OBSCN KIAA1556 KIAA1639   | Obscurin (EC 2.7.11.1) (Obscurin-RhoGEF) (Obscurin-myosin light chain kinase) (Obscurin-MLCK)                                                                                               |
| Q5VT25 | CDC42BPA KIAA0451         | Serine/threonine-protein kinase MRCK alpha (EC 2.7.11.1) (CDC42-binding protein kinase alpha) (DMPK-like alpha)                                                                             |

|        |                          |                                                                                                                                                                                                                                                                                      |
|--------|--------------------------|--------------------------------------------------------------------------------------------------------------------------------------------------------------------------------------------------------------------------------------------------------------------------------------|
|        |                          | (Myotonic dystrophy kinase-related CDC42-binding kinase alpha) (MRCK alpha) (Myotonic dystrophy protein kinase-like alpha)                                                                                                                                                           |
| Q5VT99 | LRRC38                   | Leucine-rich repeat-containing protein 38 (BK channel auxiliary gamma subunit LRRC38)                                                                                                                                                                                                |
| Q5VTD9 | GFI1B                    | Zinc finger protein Gfi-1b (Growth factor independent protein 1B) (Potential regulator of CDKN1A translocated in CML)                                                                                                                                                                |
| Q5VTE0 | EEF1A1P5 EEF1AL3         | Putative elongation factor 1-alpha-like 3 (EF-1-alpha-like 3) (Eukaryotic elongation factor 1 A-like 3) (eEF1A-like 3) (Eukaryotic translation elongation factor 1 alpha-1 pseudogene 5)                                                                                             |
| Q5VTL8 | PRPF38B                  | Pre-mRNA-splicing factor 38B (Sarcoma antigen NY-SAR-27)                                                                                                                                                                                                                             |
| Q5VUR7 | ANKRD20A3                | Ankyrin repeat domain-containing protein 20A3                                                                                                                                                                                                                                        |
| Q5VV52 | ZNF691                   | Zinc finger protein 691                                                                                                                                                                                                                                                              |
| Q5VWX1 | KHDRBS2 SLM1             | KH domain-containing, RNA-binding, signal transduction-associated protein 2 (Sam68-like mammalian protein 1) (SLM-1) (hSLM-1)                                                                                                                                                        |
| Q5VYS8 | ZCCHC6 HS2 KIAA1711 TUT7 | Terminal uridylyltransferase 7 (TUTase 7) (EC 2.7.7.52) (Zinc finger CCHC domain-containing protein 6)                                                                                                                                                                               |
| Q5VZF2 | MBNL2 MBLL MBLL39 MLP1   | Muscleblind-like protein 2 (Muscleblind-like protein 1) (Muscleblind-like protein-like) (Muscleblind-like protein-like 39)                                                                                                                                                           |
| Q5XG87 | PAPD7 POLS TRF4          | Non-canonical poly(A) RNA polymerase PAPD7 (EC 2.7.7.19) (DNA polymerase sigma) (LAK-1) (PAP-associated domain-containing protein 7) (TRAMP-like complex polyadenylate polymerase) (Terminal uridylyltransferase 5) (TUTase 5) (Topoisomerase-related function protein 4-1) (TRF4-1) |
| Q5XUX1 | FBXW9 FBW9               | F-box/WD repeat-containing protein 9 (F-box and WD-40 domain-containing protein 9)                                                                                                                                                                                                   |
| Q5XX13 | FBXW10                   | F-box/WD repeat-containing protein 10 (F-box and WD-40 domain-containing protein 10) (Ubiquitin ligase-specificity factor)                                                                                                                                                           |
| Q64LD2 | WDR25                    | WD repeat-containing protein 25                                                                                                                                                                                                                                                      |
| Q659C4 | LARP1B LARP2             | La-related protein 1B (La ribonucleoprotein domain family member 1B) (La ribonucleoprotein domain family member 2) (La-related protein 2)                                                                                                                                            |
| Q66K41 | ZNF385C                  | Zinc finger protein 385C                                                                                                                                                                                                                                                             |
| Q66K89 | E4F1 E4F                 | Transcription factor E4F1 (EC 6.3.2.-) (E4F transcription factor 1) (Putative E3 ubiquitin-protein ligase E4F1) (Transcription factor E4F) (p120E4F) (p50E4F)                                                                                                                        |
| Q66PJ3 | ARL6IP4                  | ADP-ribosylation factor-like protein 6-interacting protein 4 (ARL-6-interacting                                                                                                                                                                                                      |

|        |                                    |                                                                                                                                                                                                                                                                                                                   |
|--------|------------------------------------|-------------------------------------------------------------------------------------------------------------------------------------------------------------------------------------------------------------------------------------------------------------------------------------------------------------------|
|        |                                    | protein 4) (Aip-4) (HSP-975) (HSVI-binding protein) (SR-15) (SRp25) (SR-25) (Splicing factor SRp37)                                                                                                                                                                                                               |
| Q676U5 | ATG16L1 APG16L<br>UNQ9393/PRO34307 | Autophagy-related protein 16-1 (APG16-like 1)                                                                                                                                                                                                                                                                     |
| Q68CQ4 | DIEXF C1orf107 DEF                 | Digestive organ expansion factor homolog                                                                                                                                                                                                                                                                          |
| Q68DC2 | ANKS6 ANKRD14 PKDR1 SAMD6          | Ankyrin repeat and SAM domain-containing protein 6 (Ankyrin repeat domain-containing protein 14) (SamCystin) (Sterile alpha motif domain-containing protein 6) (SAM domain-containing protein 6)                                                                                                                  |
| Q68DV7 | RNF43                              | E3 ubiquitin-protein ligase RNF43 (EC 6.3.2.-) (RING finger protein 43)                                                                                                                                                                                                                                           |
| Q68DY1 | ZNF626                             | Zinc finger protein 626                                                                                                                                                                                                                                                                                           |
| Q68DY9 | ZNF772                             | Zinc finger protein 772                                                                                                                                                                                                                                                                                           |
| Q68EA5 | ZNF57 ZNF424                       | Zinc finger protein 57 (Zinc finger protein 424)                                                                                                                                                                                                                                                                  |
| Q69383 | ERVK-6 ERVK6                       | Endogenous retrovirus group K member 6 Rec protein (Central open reading frame) (c-orf) (cORF) (Endogenous retrovirus K protein 6) (HERV-K(C7) Rec protein) (HERV-K(HML-2.HOM) Rec protein) (HERV-K108 Rec protein) (HERV-K_7p22.1 provirus Rec protein) (K-Rev) (Rev-like protein) (Rev/Rex homolog)             |
| Q69384 | ERVK-6 ERVK6                       | Endogenous retrovirus group K member 6 Env polyprotein (EnvK2 protein) (Envelope polyprotein) (HERV-K(C7) envelope protein) (HERV-K(HML-2.HOM) envelope protein) (HERV-K108 envelope protein) (HERV-K_7p22.1 provirus ancestral Env polyprotein) [Cleaved into: Surface protein (SU); Transmembrane protein (TM)] |
| Q69YN2 | CWF19L1                            | CWF19-like protein 1 (C19L1)                                                                                                                                                                                                                                                                                      |
| Q6A1A2 | PDPK2P PDPK2                       | Putative 3-phosphoinositide-dependent protein kinase 2 (EC 2.7.11.1) (3-phosphoinositide-dependent protein kinase 2 pseudogene)                                                                                                                                                                                   |
| Q6AW86 | ZNF324B                            | Zinc finger protein 324B                                                                                                                                                                                                                                                                                          |
| Q6AZW8 | ZNF660                             | Zinc finger protein 660                                                                                                                                                                                                                                                                                           |
| Q6B0I6 | KDM4D JHDM3D JMJD2D                | Lysine-specific demethylase 4D (EC 1.14.11.-) (JmjC domain-containing histone demethylation protein 3D) (Jumonji domain-containing protein 2D)                                                                                                                                                                    |
| Q6DD87 | ZNF787                             | Zinc finger protein 787 (TTF-I-interacting peptide 20)                                                                                                                                                                                                                                                            |
| Q6DT37 | CDC42BPG DMPK2                     | Serine/threonine-protein kinase MRCK gamma (EC 2.7.11.1) (CDC42-binding protein kinase gamma) (DMPK-like gamma) (Myotonic dystrophy kinase-related CDC42-binding kinase gamma) (MRCK gamma) (MRCKG) (Myotonic dystrophy protein kinase-like gamma) (Myotonic dystrophy protein kinase-like alpha)                 |

|        |                                        |                                                                                                                                                                                                               |
|--------|----------------------------------------|---------------------------------------------------------------------------------------------------------------------------------------------------------------------------------------------------------------|
| Q6ECI4 | ZNF470 CZF1                            | Zinc finger protein 470 (Chondrogenesis zinc finger protein 1) (CZF-1)                                                                                                                                        |
| Q6EMK4 | VASN SLITL2<br>UNQ314/PRO357/PRO1282   | Vasorin (Protein slit-like 2)                                                                                                                                                                                 |
| Q6GMV3 | PTRHD1 C2orf79                         | Putative peptidyl-tRNA hydrolase PTRHD1 (EC 3.1.1.29) (Peptidyl-tRNA hydrolase domain-containing protein 1)                                                                                                   |
| Q6GPI1 | CTRB2                                  | Chymotrypsinogen B2 (EC 3.4.21.1) [Cleaved into: Chymotrypsin B2 chain A; Chymotrypsin B2 chain B; Chymotrypsin B2 chain C]                                                                                   |
| Q6I9Y2 | THOC7 NIF3L1BP1                        | THO complex subunit 7 homolog (Functional spliceosome-associated protein 24) (fSAP24) (Ngg1-interacting factor 3-like protein 1-binding protein 1) (NIF3L1-binding protein 1) (hTREX30)                       |
| Q6IA86 | ELP2 STATIP1                           | Elongator complex protein 2 (ELP2) (SHINC-2) (STAT3-interacting protein 1) (StIP1)                                                                                                                            |
| Q6IMN6 | CAPRIN2 C1QDC1 EEG1 KIAA1873<br>RNG140 | Caprin-2 (C1q domain-containing protein 1) (Cytoplasmic activation/proliferation-associated protein 2) (Gastric cancer multidrug resistance-associated protein) (Protein EEG-1) (RNA granule protein 140)     |
| Q6IN84 | MRM1                                   | rRNA methyltransferase 1, mitochondrial (EC 2.1.1.-) (16S rRNA (guanosine(1145)-2'-O)-methyltransferase) (16S rRNA [Gm1145] 2'-O-methyltransferase)                                                           |
| Q6IPR3 | TYW3 C1orf171                          | tRNA wybutosine-synthesizing protein 3 homolog (tRNA-yW-synthesizing protein 3) (EC 2.1.1.282) (tRNA(Phe) 7-((3-amino-3-carboxypropyl)-4-demethylwyosine(37)-N(4))-methyltransferase)                         |
| Q6IQ21 | ZNF770                                 | Zinc finger protein 770                                                                                                                                                                                       |
| Q6IV72 | ZNF425                                 | Zinc finger protein 425                                                                                                                                                                                       |
| Q6NSZ9 | ZSCAN25 ZNF498                         | Zinc finger and SCAN domain-containing protein 25 (Zinc finger protein 498)                                                                                                                                   |
| Q6NTF7 | APOBEC3H                               | DNA dC->dU-editing enzyme APOBEC-3H (EC 3.5.4.-) (APOBEC-related protein 10) (ARP-10) (Apolipoprotein B mRNA-editing enzyme catalytic polypeptide-like 3H) (A3H)                                              |
| Q6NUI6 | CHADL SLRR4B                           | Chondroadherin-like protein                                                                                                                                                                                   |
| Q6NUM6 | TYW1B RSAFD2                           | S-adenosyl-L-methionine-dependent tRNA 4-demethylwyosine synthase (EC 4.1.3.44) (Radical S-adenosyl methionine and flavodoxin domain-containing protein 2) (tRNA wybutosine-synthesizing protein 1 homolog B) |
| Q6NX45 | ZNF774                                 | Zinc finger protein 774                                                                                                                                                                                       |
| Q6NX49 | ZNF544                                 | Zinc finger protein 544                                                                                                                                                                                       |
| Q6NXG1 | ESRP1 RBM35A                           | Epithelial splicing regulatory protein 1 (RNA-binding motif protein 35A) (RNA-binding protein 35A)                                                                                                            |
| Q6NXT1 | ANKRD54 LIAR                           | Ankyrin repeat domain-containing protein 54 (Lyn-interacting ankyrin repeat protein)                                                                                                                          |

|        |                        |                                                                                                                                                                                                                                                                                                         |
|--------|------------------------|---------------------------------------------------------------------------------------------------------------------------------------------------------------------------------------------------------------------------------------------------------------------------------------------------------|
| Q6NYC1 | JMJD6 KIAA0585 PTDSR   | Bifunctional arginine demethylase and lysyl-hydroxylase JMJD6 (EC 1.14.11.-) (Histone arginine demethylase JMJD6) (JmjC domain-containing protein 6) (Jumonji domain-containing protein 6) (Lysyl-hydroxylase JMJD6) (Peptide-lysine 5-dioxygenase JMJD6) (Phosphatidylserine receptor) (Protein PTDSR) |
| Q6P087 | RPUSD3                 | RNA pseudouridylate synthase domain-containing protein 3                                                                                                                                                                                                                                                |
| Q6P0Q8 | MAST2 KIAA0807 MAST205 | Microtubule-associated serine/threonine-protein kinase 2 (EC 2.7.11.1)                                                                                                                                                                                                                                  |
| Q6P158 | DHX57                  | Putative ATP-dependent RNA helicase DHX57 (EC 3.6.4.13) (DEAH box protein 57)                                                                                                                                                                                                                           |
| Q6P1L6 | ZNF343                 | Zinc finger protein 343                                                                                                                                                                                                                                                                                 |
| Q6P1R4 | DUS1L                  | tRNA-dihydrouridine(16/17) synthase [NAD(P)(+)]-like (EC 1.3.1.-) (tRNA-dihydrouridine synthase 1-like)                                                                                                                                                                                                 |
| Q6P280 | ZNF529 KIAA1615        | Zinc finger protein 529                                                                                                                                                                                                                                                                                 |
| Q6P2D0 | ZFP1 ZNF475            | Zinc finger protein 1 homolog (Zfp-1) (Zinc finger protein 475)                                                                                                                                                                                                                                         |
| Q6P2I7 | EBLN2 GK006            | Endogenous Bornavirus-like nucleoprotein 2 (Endogenous Borna-like N element-2) (EBLN-2)                                                                                                                                                                                                                 |
| Q6P2M8 | PNCK                   | Calcium/calmodulin-dependent protein kinase type 1B (EC 2.7.11.17) (CaM kinase I beta) (CaM kinase IB) (CaM-KI beta) (CaMKI-beta) (Pregnancy up-regulated non-ubiquitously-expressed CaM kinase)                                                                                                        |
| Q6P2Q9 | PRPF8 PRPC8            | Pre-mRNA-processing-splicing factor 8 (220 kDa U5 snRNP-specific protein) (PRP8 homolog) (Splicing factor Prp8) (p220)                                                                                                                                                                                  |
| Q6P3R8 | NEK5                   | Serine/threonine-protein kinase Nek5 (EC 2.7.11.1) (Never in mitosis A-related kinase 5) (NimA-related protein kinase 5)                                                                                                                                                                                |
| Q6P3V2 | ZNF585A                | Zinc finger protein 585A                                                                                                                                                                                                                                                                                |
| Q6P5Z2 | PKN3 PKNBETA           | Serine/threonine-protein kinase N3 (EC 2.7.11.13) (Protein kinase PKN-beta) (Protein-kinase C-related kinase 3)                                                                                                                                                                                         |
| Q6P6B7 | ANKRD16                | Ankyrin repeat domain-containing protein 16                                                                                                                                                                                                                                                             |
| Q6P9A1 | ZNF530 KIAA1508        | Zinc finger protein 530                                                                                                                                                                                                                                                                                 |
| Q6P9A3 | ZNF549                 | Zinc finger protein 549                                                                                                                                                                                                                                                                                 |
| Q6P9B9 | INTS5 KIAA1698         | Integrator complex subunit 5 (Int5)                                                                                                                                                                                                                                                                     |
| Q6PDB4 | ZNF880                 | Zinc finger protein 880                                                                                                                                                                                                                                                                                 |
| Q6PEZ8 | PODNL1 SLRR5B          | Podocan-like protein 1                                                                                                                                                                                                                                                                                  |
| Q6PF06 | TRMT10B RG9MTD3        | tRNA methyltransferase 10 homolog B (EC 2.1.1.-) (RNA (guanine-9-)-methyltransferase domain-containing protein 3)                                                                                                                                                                                       |
| Q6PG37 | ZNF790                 | Zinc finger protein 790                                                                                                                                                                                                                                                                                 |
| Q6PHR2 | ULK3                   | Serine/threonine-protein kinase ULK3 (EC 2.7.11.1) (Unc-51-like kinase 3)                                                                                                                                                                                                                               |
| Q6PI48 | DARS2                  | Aspartate--tRNA ligase, mitochondrial (EC                                                                                                                                                                                                                                                               |



|        |                              |                                                                                                                                                              |
|--------|------------------------------|--------------------------------------------------------------------------------------------------------------------------------------------------------------|
|        |                              | 6.1.1.12) (Aspartyl-tRNA synthetase) (AspRS)                                                                                                                 |
| Q6PIY7 | PAPD4 GLD2                   | Poly(A) RNA polymerase GLD2 (hGLD-2) (EC 2.7.7.19) (PAP-associated domain-containing protein 4) (Terminal uridylyltransferase 2) (TUTase 2)                  |
| Q6PJ69 | TRIM65                       | Tripartite motif-containing protein 65                                                                                                                       |
| Q6PJI9 | WDR59 KIAA1923 FP977         | WD repeat-containing protein 59                                                                                                                              |
| Q6PK81 | ZNF773 ZNF419B               | Zinc finger protein 773 (Zinc finger protein 419B)                                                                                                           |
| Q6PKG0 | LARP1 KIAA0731 LARP          | La-related protein 1 (La ribonucleoprotein domain family member 1)                                                                                           |
| Q6Q0C0 | TRAF7 RFWD1 RNF119           | E3 ubiquitin-protein ligase TRAF7 (EC 6.3.2.-) (RING finger and WD repeat-containing protein 1) (RING finger protein 119) (TNF receptor-associated factor 7) |
| Q6QEF8 | CORO6 PP1009 PP1782 PP1881   | Coronin-6 (Coronin-like protein E) (Clipin-E)                                                                                                                |
| Q6RI45 | BRWD3                        | Bromodomain and WD repeat-containing protein 3                                                                                                               |
| Q6RSH7 | VHLL VLP                     | Von Hippel-Lindau-like protein (VHL-like protein) (VLP)                                                                                                      |
| Q6S545 | POTEH A26C3 ACTBL1 POTE22    | POTE ankyrin domain family member H (ANKRD26-like family C member 3) (Prostate, ovary, testis-expressed protein on chromosome 22) (POTE-22)                  |
| Q6S5H4 | POTEB A26B1 POTE15           | POTE ankyrin domain family member B (ANKRD26-like family B member 1) (Prostate, ovary, testis-expressed protein on chromosome 15) (POTE-15)                  |
| Q6S5H5 | POTEG A26C2 POTE14           | POTE ankyrin domain family member G (ANKRD26-like family C member 2) (Prostate, ovary, testis-expressed protein on chromosome 14) (POTE-14)                  |
| Q6S8J3 | POTEE A26C1A POTE2           | POTE ankyrin domain family member E (ANKRD26-like family C member 1A) (Prostate, ovary, testis-expressed protein on chromosome 2) (POTE-2)                   |
| Q6S8J7 | POTEA A26A1 POTE8            | POTE ankyrin domain family member A (ANKRD26-like family A member 1) (Prostate, ovary, testis-expressed protein on chromosome 8) (POTE-8)                    |
| Q6SA08 | TSSK4 C14orf20 STK22E TSSK5  | Testis-specific serine/threonine-protein kinase 4 (TSK-4) (TSSK-4) (Testis-specific kinase 4) (EC 2.7.11.1) (Serine/threonine-protein kinase 22E)            |
| Q6SJ96 | TBPL2 TBP2 TRF3              | TATA box-binding protein-like protein 2 (TBP-like protein 2) (TATA box-binding protein-related factor 3) (TBP-related factor 3)                              |
| Q6UB98 | ANKRD12 ANCO2 KIAA0874       | Ankyrin repeat domain-containing protein 12 (Ankyrin repeat-containing cofactor 2) (GAC-1 protein)                                                           |
| Q6UN15 | FIP1L1 FIP1 RHE              | Pre-mRNA 3'-end-processing factor FIP1 (hFip1) (FIP1-like 1 protein) (Factor interacting with PAP) (Rearranged in hypereosinophilia)                         |
| Q6UWB4 | PRSS55 TSP1 UNQ9391/PRO34284 | Serine protease 55 (EC 3.4.21.-) (Testis serine protease 1) (T-SPI)                                                                                          |

|        |                                            |                                                                                                                                                                                      |
|--------|--------------------------------------------|--------------------------------------------------------------------------------------------------------------------------------------------------------------------------------------|
| Q6UWQ5 | LYZL1 LYC2 UNQ648/PRO1278                  | Lysozyme-like protein 1 (EC 3.2.1.17)                                                                                                                                                |
| Q6UXH9 | PAMR1 RAMP FP938<br>UNQ699/PRO1344         | Inactive serine protease PAMR1 (Peptidase domain-containing protein associated with muscle regeneration 1) (Regeneration-associated muscle protease homolog)                         |
| Q6UXK2 | ISLR2 KIAA1465 LINX<br>UNQ1885/PRO4329     | Immunoglobulin superfamily containing leucine-rich repeat protein 2 (Leucine-rich repeat domain and immunoglobulin domain-containing axon extension protein)                         |
| Q6UXK5 | LRRN1 KIAA1497 Nbla10449<br>UNQ693/PRO1338 | Leucine-rich repeat neuronal protein 1 (Neuronal leucine-rich repeat protein 1) (NLRR-1)                                                                                             |
| Q6UXM1 | LRIG3 LIG3 UNQ287/PRO326/PRO335            | Leucine-rich repeats and immunoglobulin-like domains protein 3 (LIG-3)                                                                                                               |
| Q6UXN9 | WDR82 TMEM113 WDR82A<br>UNQ9342/PRO34047   | WD repeat-containing protein 82 (Protein TMEM113) (Swd2)                                                                                                                             |
| Q6UY18 | LINGO4 LRRN6D<br>UNQ9248/PRO34002          | Leucine-rich repeat and immunoglobulin-like domain-containing nogo receptor-interacting protein 4 (Leucine-rich repeat neuronal protein 6D)                                          |
| Q6W2J9 | BCOR KIAA1575                              | BCL-6 corepressor (BCoR)                                                                                                                                                             |
| Q6WRI0 | IGSF10 CMF608                              | Immunoglobulin superfamily member 10 (IgSF10) (Calvaria mechanical force protein 608) (CMF608)                                                                                       |
| Q6XE24 | RBMS3                                      | RNA-binding motif, single-stranded-interacting protein 3                                                                                                                             |
| Q6ZMR5 | TMPRSS11A ECRG1 HATL1 HESP                 | Transmembrane protease serine 11A (EC 3.4.21.-) (Airway trypsin-like protease 1) (Epidermal type-II transmembrane serine protease) (Esophageal cancer-susceptibility gene 1 protein) |
| Q6ZMS4 | ZNF852                                     | Zinc finger protein 852                                                                                                                                                              |
| Q6ZMT4 | KDM7A JHDM1D KDM7 KIAA1718                 | Lysine-specific demethylase 7A (EC 1.14.11.-) (JmjC domain-containing histone demethylation protein 1D) (Lysine-specific demethylase 7)                                              |
| Q6ZMV8 | ZNF730                                     | Putative zinc finger protein 730                                                                                                                                                     |
| Q6ZMW2 | ZNF782                                     | Zinc finger protein 782                                                                                                                                                              |
| Q6ZMW3 | EML6 EML5L                                 | Echinoderm microtubule-associated protein-like 6 (EMAP-6) (Echinoderm microtubule-associated protein-like 5-like)                                                                    |
| Q6ZMY6 | WDR88 PQWD                                 | WD repeat-containing protein 88 (PQQ repeat and WD repeat-containing protein)                                                                                                        |
| Q6ZMY9 | ZNF517                                     | Zinc finger protein 517                                                                                                                                                              |
| Q6ZN04 | MEX3B KIAA2009 RKHD3 RNF195                | RNA-binding protein MEX3B (RING finger and KH domain-containing protein 3) (RING finger protein 195)                                                                                 |
| Q6ZN08 | ZNF66 ZNF66P                               | Putative zinc finger protein 66 (Zinc finger protein 66 pseudogene)                                                                                                                  |
| Q6ZN16 | MAP3K15 ASK3                               | Mitogen-activated protein kinase kinase kinase 15 (EC 2.7.11.25) (Apoptosis signal-regulating kinase 3) (MAPK/ERK kinase kinase 15) (MEK kinase 15) (MEKK 15)                        |
| Q6ZN17 | LIN28B CSDD2                               | Protein lin-28 homolog B (Lin-28B)                                                                                                                                                   |
| Q6ZN19 | ZNF841                                     | Zinc finger protein 841                                                                                                                                                              |
| Q6ZN55 | ZNF574                                     | Zinc finger protein 574                                                                                                                                                              |

|        |                          |                                                                                                                                                                                                                                                            |
|--------|--------------------------|------------------------------------------------------------------------------------------------------------------------------------------------------------------------------------------------------------------------------------------------------------|
| Q6ZN57 | ZFP2 ZNF751              | Zinc finger protein 2 homolog (Zfp-2) (Zinc finger protein 751)                                                                                                                                                                                            |
| Q6ZNA1 | ZNF836                   | Zinc finger protein 836                                                                                                                                                                                                                                    |
| Q6ZNA4 | RNF111                   | E3 ubiquitin-protein ligase Arkadia (EC 6.3.2.-) (RING finger protein 111)                                                                                                                                                                                 |
| Q6ZNG0 | ZNF620                   | Zinc finger protein 620                                                                                                                                                                                                                                    |
| Q6ZNG1 | ZNF600                   | Zinc finger protein 600                                                                                                                                                                                                                                    |
| Q6ZNH5 | ZNF497                   | Zinc finger protein 497                                                                                                                                                                                                                                    |
| Q6ZNQ3 | LRRC69                   | Leucine-rich repeat-containing protein 69                                                                                                                                                                                                                  |
| Q6ZQV5 | ZNF788                   | Zinc finger protein 788                                                                                                                                                                                                                                    |
| Q6ZR52 | ZNF493                   | Zinc finger protein 493                                                                                                                                                                                                                                    |
| Q6ZRY4 | RBPMS2                   | RNA-binding protein with multiple splicing 2                                                                                                                                                                                                               |
| Q6ZS27 | ZNF662                   | Zinc finger protein 662                                                                                                                                                                                                                                    |
| Q6ZS30 | NBEAL1 ALS2CR16 ALS2CR17 | Neurobeachin-like protein 1 (Amyotrophic lateral sclerosis 2 chromosomal region candidate gene 16 protein) (Amyotrophic lateral sclerosis 2 chromosomal region candidate gene 17 protein)                                                                  |
| Q6ZS81 | WDFY4 C10orf64 KIAA1607  | WD repeat- and FYVE domain-containing protein 4                                                                                                                                                                                                            |
| Q6ZSA7 | LRRC55                   | Leucine-rich repeat-containing protein 55 (BK channel auxiliary gamma subunit LRRC55)                                                                                                                                                                      |
| Q6ZSB9 | ZBTB49 ZNF509            | Zinc finger and BTB domain-containing protein 49 (Zinc finger protein 509)                                                                                                                                                                                 |
| Q6ZSG1 | RNF165                   | RING finger protein 165                                                                                                                                                                                                                                    |
| Q6ZVH7 | ESPNL                    | Espin-like protein                                                                                                                                                                                                                                         |
| Q6ZW76 | ANKS3 KIAA1977           | Ankyrin repeat and SAM domain-containing protein 3                                                                                                                                                                                                         |
| Q6ZWH5 | NEK10                    | Serine/threonine-protein kinase Nek10 (EC 2.7.11.1) (Never in mitosis A-related kinase 10) (NimA-related protein kinase 10)                                                                                                                                |
| Q6ZWK6 | TMPRSS11F HATL4          | Transmembrane protease serine 11F (EC 3.4.21.-) (Airway trypsin-like protease 4)                                                                                                                                                                           |
| Q71RC2 | LARP4 PP13296            | La-related protein 4 (La ribonucleoprotein domain family member 4)                                                                                                                                                                                         |
| Q76KX8 | ZNF534 KRBO3             | Zinc finger protein 534 (KRAB domain only protein 3)                                                                                                                                                                                                       |
| Q76MJ5 | ERN2 IRE2                | Serine/threonine-protein kinase/endoribonuclease IRE2 (Endoplasmic reticulum-to-nucleus signaling 2) (Inositol-requiring protein 2) (hIRE2p) (Ire1-beta) (IRE1b) [Includes: Serine/threonine-protein kinase (EC 2.7.11.1); Endoribonuclease (EC 3.1.26.-)] |
| Q7KZI7 | MARK2 EMK1               | Serine/threonine-protein kinase MARK2 (EC 2.7.11.1) (EC 2.7.11.26) (ELKL motif kinase 1) (EMK-1) (MAP/microtubule affinity-regulating kinase 2) (PAR1 homolog) (PAR1 homolog b) (Par-1b) (Par1b)                                                           |
| Q7L014 | DDX46 KIAA0801           | Probable ATP-dependent RNA helicase DDX46 (EC 3.6.4.13) (DEAD box protein 46) (PRP5 homolog)                                                                                                                                                               |
| Q7L0R7 | RNF44 KIAA1100           | RING finger protein 44                                                                                                                                                                                                                                     |

|        |                                      |                                                                                                                                                                                                                                                                        |
|--------|--------------------------------------|------------------------------------------------------------------------------------------------------------------------------------------------------------------------------------------------------------------------------------------------------------------------|
| Q7L0X0 | TRIL KIAA0644                        | TLR4 interactor with leucine rich repeats (Leucine-rich repeat-containing protein KIAA0644)                                                                                                                                                                            |
| Q7L0Y3 | TRMT10C MRPP1 RG9MTD1                | Mitochondrial ribonuclease P protein 1 (Mitochondrial RNase P protein 1) (EC 2.1.1.-) (HBV pre-S2 trans-regulated protein 2) (RNA (guanine-9)-methyltransferase domain-containing protein 1) (Renal carcinoma antigen NY-REN-49) (tRNA methyltransferase 10 homolog C) |
| Q7L2E3 | DHX30 DDX30 KIAA0890                 | Putative ATP-dependent RNA helicase DHX30 (EC 3.6.4.13) (DEAH box protein 30)                                                                                                                                                                                          |
| Q7L2J0 | MEPCE BCDIN3                         | 7SK snRNA methylphosphate capping enzyme (MePCE) (EC 2.1.1.-) (Bicoid-interacting protein 3 homolog) (Bin3 homolog)                                                                                                                                                    |
| Q7L3S4 | ZNF771                               | Zinc finger protein 771 (Mesenchymal stem cell protein DSC43)                                                                                                                                                                                                          |
| Q7L3T8 | PARS2                                | Probable proline--tRNA ligase, mitochondrial (EC 6.1.1.15) (Prolyl-tRNA synthetase) (ProRS)                                                                                                                                                                            |
| Q7L7V1 | DHX32 DDX32                          | Putative pre-mRNA-splicing factor ATP-dependent RNA helicase DHX32 (EC 3.6.4.13) (DEAD/H box 32) (DEAD/H helicase-like protein 1) (DHLPI) (DEAH box protein 32) (HuDDX32)                                                                                              |
| Q7L8L6 | FASTKD5 KIAA1792                     | FAST kinase domain-containing protein 5                                                                                                                                                                                                                                |
| Q7L945 | ZNF627                               | Zinc finger protein 627                                                                                                                                                                                                                                                |
| Q7L985 | LINGO2 LERN3 LRRN6C UNQ9234/PRO31993 | Leucine-rich repeat and immunoglobulin-like domain-containing nogo receptor-interacting protein 2 (Leucine-rich repeat neuronal protein 3) (Leucine-rich repeat neuronal protein 6C)                                                                                   |
| Q7LBC6 | KDM3B C5orf7 JHDM2B JMJD1B KIAA1082  | Lysine-specific demethylase 3B (EC 1.14.11.-) (JmjC domain-containing histone demethylation protein 2B) (Jumonji domain-containing protein 1B) (Nuclear protein 5qNCA)                                                                                                 |
| Q7RTY3 | PRSS45 TESSP5                        | Serine protease 45 (EC 3.4.21.-) (Testis serine protease 5)                                                                                                                                                                                                            |
| Q7RTY5 | PRSS48 ESSPL                         | Serine protease 48 (EC 3.4.21.-) (Epidermis-specific serine protease-like protein)                                                                                                                                                                                     |
| Q7RTY7 | OVCH1                                | Ovochymase-1 (EC 3.4.21.-)                                                                                                                                                                                                                                             |
| Q7RTY8 | TMPRSS7                              | Transmembrane protease serine 7 (EC 3.4.21.-) (Matriptase-3)                                                                                                                                                                                                           |
| Q7RTY9 | PRSS41 TESSP1                        | Putative serine protease 41 (EC 3.4.21.-) (Testis serine protease 1) (TESSP-1)                                                                                                                                                                                         |
| Q7RTZ1 | OVCH2 OVTN                           | Ovochymase-2 (EC 3.4.21.-) (Oviductin)                                                                                                                                                                                                                                 |
| Q7Z2E3 | APTAX AXA1                           | Aprataxin (EC 3.-.-) (Forkhead-associated domain histidine triad-like protein) (FHA-HIT)                                                                                                                                                                               |
| Q7Z2Q7 | LRRC70 UNQ1891/PRO4337               | Leucine-rich repeat-containing protein 70 (Synleurin)                                                                                                                                                                                                                  |
| Q7Z2T5 | TRMT1L C1orf25 TRM1L MSTP070         | TRMT1-like protein (EC 2.1.1.-)                                                                                                                                                                                                                                        |

|        |                           |                                                                                                                                                                                    |
|--------|---------------------------|------------------------------------------------------------------------------------------------------------------------------------------------------------------------------------|
| Q7Z2Y5 | NRK                       | Nik-related protein kinase (EC 2.7.11.1)                                                                                                                                           |
| Q7Z2Z2 | EFTUD1 EFL1 FAM42A        | Elongation factor Tu GTP-binding domain-containing protein 1 (Elongation factor-like 1) (Protein FAM42A)                                                                           |
| Q7Z340 | ZNF551 KOX23              | Zinc finger protein 551 (Zinc finger protein KOX23)                                                                                                                                |
| Q7Z398 | ZNF550                    | Zinc finger protein 550                                                                                                                                                            |
| Q7Z3I7 | ZNF572                    | Zinc finger protein 572                                                                                                                                                            |
| Q7Z3V5 | ZNF571 HSPC059            | Zinc finger protein 571                                                                                                                                                            |
| Q7Z3Z3 | PIWIL3                    | Piwi-like protein 3                                                                                                                                                                |
| Q7Z3Z4 | PIWIL4 HIWI2 PIWI         | Piwi-like protein 4                                                                                                                                                                |
| Q7Z410 | TMPRSS9                   | Transmembrane protease serine 9 (EC 3.4.21.-) (Polyserase-I) (Polyserine protease 1) (Polyserase-1) [Cleaved into: Serase-1; Serase-2; Serase-3]                                   |
| Q7Z478 | DHX29 DDX29               | ATP-dependent RNA helicase DHX29 (EC 3.6.4.13) (DEAH box protein 29) (Nucleic acid helicase DDXx)                                                                                  |
| Q7Z4G4 | TRMT11 C6orf75 MDS024     | tRNA (guanine(10)-N2)-methyltransferase homolog (EC 2.1.1.-) (tRNA guanosine-2'-O-methyltransferase TRM11 homolog)                                                                 |
| Q7Z4S6 | KIF21A KIAA1708 KIF2      | Kinesin-like protein KIF21A (Kinesin-like protein KIF2) (Renal carcinoma antigen NY-REN-62)                                                                                        |
| Q7Z4W2 | LYZL2                     | Lysozyme-like protein 2 (Lysozyme-2) (EC 3.2.1.17)                                                                                                                                 |
| Q7Z5A4 | PRSS42 TESSP2             | Serine protease 42 (EC 3.4.21.-) (Testis serine protease 2)                                                                                                                        |
| Q7Z5L7 | PODN SLRR5A UNQ293/PRO332 | Podocan                                                                                                                                                                            |
| Q7Z5Q1 | CPEB2                     | Cytoplasmic polyadenylation element-binding protein 2 (CPE-BP2) (CPE-binding protein 2) (hCPEB-2)                                                                                  |
| Q7Z5U6 | WDR53                     | WD repeat-containing protein 53                                                                                                                                                    |
| Q7Z5W3 | BCDIN3D                   | Pre-miRNA 5'-monophosphate methyltransferase (EC 2.1.1.-) (BCDIN3 domain-containing protein)                                                                                       |
| Q7Z695 | ADCK2 AARF                | Uncharacterized aarF domain-containing protein kinase 2 (EC 2.7.11.-)                                                                                                              |
| Q7Z6G8 | ANKS1B                    | Ankyrin repeat and sterile alpha motif domain-containing protein 1B (Amyloid-beta protein intracellular domain-associated protein 1) (AIDA-1) (E2A-PBX1-associated protein) (EB-1) |
| Q7Z6V5 | ADAT2 DEADC1              | tRNA-specific adenosine deaminase 2 (EC 3.5.4.-) (Deaminase domain-containing protein 1) (tRNA-specific adenosine-34 deaminase subunit ADAT2)                                      |
| Q7Z739 | YTHDF3                    | YTH domain-containing family protein 3                                                                                                                                             |
| Q7Z7F7 | MRPL55 UNQ5835/PRO19675   | 39S ribosomal protein L55, mitochondrial (L55mt) (MRP-L55)                                                                                                                         |
| Q7Z7K2 | ZNF467                    | Zinc finger protein 467                                                                                                                                                            |
| Q7Z7L9 | ZSCAN2 ZFP29 ZNF854       | Zinc finger and SCAN domain-containing protein 2 (Zinc finger protein 29 homolog) (Zfp-29) (Zinc finger protein 854)                                                               |
| Q86SE5 | RALYL HNRPCL3             | RNA-binding Raly-like protein (hRALYL) (Heterogeneous nuclear ribonucleoprotein                                                                                                    |

|        |                        |                                                                                                                                                                                         |
|--------|------------------------|-----------------------------------------------------------------------------------------------------------------------------------------------------------------------------------------|
|        |                        | C-like 3) (hnRNP core protein C-like 3)                                                                                                                                                 |
| Q86SG2 | ANKRD23 DARP           | Ankyrin repeat domain-containing protein 23 (Diabetes-related ankyrin repeat protein) (Muscle ankyrin repeat protein 3)                                                                 |
| Q86SG3 | DAZ4                   | Deleted in azoospermia protein 4                                                                                                                                                        |
| Q86SG6 | NEK8 JCK NEK12A        | Serine/threonine-protein kinase Nek8 (EC 2.7.11.1) (Never in mitosis A-related kinase 8) (NimA-related protein kinase 8) (Nima-related protein kinase 12a)                              |
| Q86SJ2 | AMIGO2 ALI1            | Amphoterin-induced protein 2 (AMIGO-2) (Alivin-1) (Differentially expressed in gastric adenocarcinomas) (DEGA)                                                                          |
| Q86T26 | TMPRSS11B HATL5        | Transmembrane protease serine 11B (EC 3.4.21.-) (Airway trypsin-like protease 5)                                                                                                        |
| Q86T29 | ZNF605                 | Zinc finger protein 605                                                                                                                                                                 |
| Q86TI4 | WDR86                  | WD repeat-containing protein 86                                                                                                                                                         |
| Q86TJ5 | ZNF554                 | Zinc finger protein 554                                                                                                                                                                 |
| Q86TM3 | DDX53 CAGE             | Probable ATP-dependent RNA helicase DDX53 (EC 3.6.4.13) (Cancer-associated gene protein) (Cancer/testis antigen 26) (CT26) (DEAD box protein 53) (DEAD box protein CAGE)                |
| Q86TM6 | SYVN1 HRD1 KIAA1810    | E3 ubiquitin-protein ligase synoviolin (EC 6.3.2.-) (Synovial apoptosis inhibitor 1)                                                                                                    |
| Q86TN4 | TRPT1                  | tRNA 2'-phosphotransferase 1 (EC 2.7.1.160)                                                                                                                                             |
| Q86TW2 | ADCK1                  | Uncharacterized aarF domain-containing protein kinase 1 (EC 2.7.11.-)                                                                                                                   |
| Q86U06 | RBM23 RNPC4 PP239      | Probable RNA-binding protein 23 (RNA-binding motif protein 23) (RNA-binding region-containing protein 4) (Splicing factor SF2)                                                          |
| Q86U38 | NOP9 C14orf21 KIAA2021 | Nucleolar protein 9                                                                                                                                                                     |
| Q86U42 | PABPN1 PAB2 PABP2      | Polyadenylate-binding protein 2 (PABP-2) (Poly(A)-binding protein 2) (Nuclear poly(A)-binding protein 1) (Poly(A)-binding protein II) (PABII) (Polyadenylate-binding nuclear protein 1) |
| Q86U44 | METTL3 MTA70           | N6-adenosine-methyltransferase 70 kDa subunit (MT-A70) (EC 2.1.1.62) (Methyltransferase-like protein 3)                                                                                 |
| Q86U90 | YRDC DRIP3 IRIP        | YrdC domain-containing protein, mitochondrial (Dopamine receptor-interacting protein 3) (Ischemia/reperfusion-inducible protein homolog) (hIRIP)                                        |
| Q86UD4 | ZNF329                 | Zinc finger protein 329                                                                                                                                                                 |
| Q86UE3 | ZNF546 ZNF49           | Zinc finger protein 546 (Zinc finger protein 49)                                                                                                                                        |
| Q86UE6 | LRRTM1 UNQ675/PRO1309  | Leucine-rich repeat transmembrane neuronal protein 1                                                                                                                                    |
| Q86UE8 | TLK2                   | Serine/threonine-protein kinase tousled-like 2 (EC 2.7.11.1) (HsHPK) (PKU-alpha) (Tousled-like kinase 2)                                                                                |
| Q86UK0 | ABCA12 ABC12           | ATP-binding cassette sub-family A member 12 (ATP-binding cassette transporter 12) (ATP-binding cassette 12)                                                                             |

|        |                                       |                                                                                                                                                                        |
|--------|---------------------------------------|------------------------------------------------------------------------------------------------------------------------------------------------------------------------|
| Q86UN2 | RTN4RL1 NGRH2 NGRL2                   | Reticulon-4 receptor-like 1 (Nogo receptor-like 2) (Nogo-66 receptor homolog 2) (Nogo-66 receptor-related protein 3) (NgR3)                                            |
| Q86UQ0 | ZNF589 SZF1                           | Zinc finger protein 589 (Stem cell zinc finger protein 1)                                                                                                              |
| Q86UQ4 | ABCA13                                | ATP-binding cassette sub-family A member 13                                                                                                                            |
| Q86US8 | SMG6 C17orf31 EST1A KIAA0732          | Telomerase-binding protein EST1A (EC 3.1.-.-) (EST1-like protein A) (Ever shorter telomeres 1A) (Smg-6 homolog) (Telomerase subunit EST1A) (hSmg5/7a)                  |
| Q86UX6 | STK32C YANK3                          | Serine/threonine-protein kinase 32C (EC 2.7.11.1) (PKE) (Yet another novel kinase 3)                                                                                   |
| Q86V71 | ZNF429                                | Zinc finger protein 429                                                                                                                                                |
| Q86V81 | ALYREF ALY BEF THOC4                  | THO complex subunit 4 (Tho4) (Ally of AML-1 and LEF-1) (Aly/REF export factor) (Transcriptional coactivator Aly/REF) (bZIP-enhancing factor BEF)                       |
| Q86V86 | PIM3                                  | Serine/threonine-protein kinase pim-3 (EC 2.7.11.1)                                                                                                                    |
| Q86VH4 | LRRTM4 UNQ3075/PRO9907                | Leucine-rich repeat transmembrane neuronal protein 4                                                                                                                   |
| Q86VH5 | LRRTM3 UNQ803/PRO1693                 | Leucine-rich repeat transmembrane neuronal protein 3                                                                                                                   |
| Q86VK4 | ZNF410 APA1                           | Zinc finger protein 410 (Another partner for ARF 1) (Zinc finger protein APA-1)                                                                                        |
| Q86VZ2 | WDR5B                                 | WD repeat-containing protein 5B                                                                                                                                        |
| Q86W11 | ZSCAN30 ZNF397OS                      | Zinc finger and SCAN domain-containing protein 30 (ZNF-WYM) (Zinc finger protein 397 opposite strand) (Zinc finger protein 397OS)                                      |
| Q86WB0 | ZC3HC1 NIPA HSPC216                   | Nuclear-interacting partner of ALK (Nuclear-interacting partner of anaplastic lymphoma kinase) (hNIPA) (Zinc finger C3HC-type protein 1)                               |
| Q86WK6 | AMIGO1 ALI2 AMIGO KIAA1163            | Amphoterin-induced protein 1 (AMIGO-1) (Alivin-2)                                                                                                                      |
| Q86WK7 | AMIGO3 ALI3 KIAA1851 UNQ6084/PRO20089 | Amphoterin-induced protein 3 (AMIGO-3) (Alivin-3)                                                                                                                      |
| Q86WS5 | TMPRSS12                              | Transmembrane protease serine 12 (EC 3.4.21.-)                                                                                                                         |
| Q86WV6 | TMEM173 ERIS MITA STING               | Stimulator of interferon genes protein (hSTING) (Endoplasmic reticulum interferon stimulator) (ERIS) (Mediator of IRF3 activation) (hMITA) (Transmembrane protein 173) |
| Q86WZ6 | ZNF227                                | Zinc finger protein 227                                                                                                                                                |
| Q86XD8 | ZFAND4 ANUBL1                         | AN1-type zinc finger protein 4 (AN1-type zinc finger and ubiquitin domain-containing protein-like 1)                                                                   |
| Q86XN6 | ZNF761 KIAA2033                       | Zinc finger protein 761                                                                                                                                                |
| Q86XN8 | MEX3D KIAA2031 RKHD1 RNF193           | RNA-binding protein MEX3D (RING finger and KH domain-containing protein 1) (RING finger protein 193) (TINO)                                                            |
| Q86XP3 | DDX42                                 | ATP-dependent RNA helicase DDX42 (EC 3.6.4.13) (DEAD box protein 42) (RNA                                                                                              |

|        |                                          |                                                                                                                                                                                                                                                                                                                |
|--------|------------------------------------------|----------------------------------------------------------------------------------------------------------------------------------------------------------------------------------------------------------------------------------------------------------------------------------------------------------------|
|        |                                          | helicase-like protein) (RHELP) (RNA helicase-related protein) (RNAHP) (SF3b DEAD box protein) (Splicing factor 3B-associated 125 kDa protein) (SF3b125)                                                                                                                                                        |
| Q86XS8 | RNF130                                   | E3 ubiquitin-protein ligase RNF130 (EC 6.3.2.-) (Goliath homolog) (H-Goliath) (RING finger protein 130)                                                                                                                                                                                                        |
| Q86XU0 | ZNF677                                   | Zinc finger protein 677                                                                                                                                                                                                                                                                                        |
| Q86Y25 | ZNF354C KID3                             | Zinc finger protein 354C (Kidney, ischemia, and developmentally-regulated protein 3) (hKID3)                                                                                                                                                                                                                   |
| Q86Y33 | CDC20B G6VTS76519                        | Cell division cycle protein 20 homolog B                                                                                                                                                                                                                                                                       |
| Q86Y79 | PTRH1 C9orf115                           | Probable peptidyl-tRNA hydrolase (PTH) (EC 3.1.1.29)                                                                                                                                                                                                                                                           |
| Q86YC3 | NRROS LRRC33 UNQ3030/PRO9833             | Negative regulator of reactive oxygen species (Leucine-rich repeat-containing protein 33)                                                                                                                                                                                                                      |
| Q86YE8 | ZNF573                                   | Zinc finger protein 573                                                                                                                                                                                                                                                                                        |
| Q86YR6 | POTED A26B3 ANKRD21 POTE                 | POTE ankyrin domain family member D (ANKRD26-like family B member 3) (Ankyrin repeat domain-containing protein 21) (Prostate, ovary, testis-expressed protein) (Protein POTE)                                                                                                                                  |
| Q86YT6 | MIB1 DIP1 KIAA1323 ZZANK2                | E3 ubiquitin-protein ligase MIB1 (EC 6.3.2.-) (DAPK-interacting protein 1) (DIP-1) (Mind bomb homolog 1) (Zinc finger ZZ type with ankyrin repeat domain protein 2)                                                                                                                                            |
| Q86YV6 | MYLK4 SGK085                             | Myosin light chain kinase family member 4 (EC 2.7.11.1) (Sugen kinase 85) (SgK085)                                                                                                                                                                                                                             |
| Q86Z02 | HIPK1 KIAA0630 MYAK NBAK2                | Homeodomain-interacting protein kinase 1 (EC 2.7.11.1) (Nuclear body-associated kinase 2)                                                                                                                                                                                                                      |
| Q8IU60 | DCP2 NUDT20                              | m7GpppN-mRNA hydrolase (EC 3.6.1.62) (Nucleoside diphosphate-linked moiety X motif 20) (Nudix motif 20) (mRNA-decapping enzyme 2) (hDpc)                                                                                                                                                                       |
| Q8IU80 | TMPRSS6 UNQ354/PRO618                    | Transmembrane protease serine 6 (EC 3.4.21.-) (Matriptase-2)                                                                                                                                                                                                                                                   |
| Q8IU85 | CAMK1D CAMKID                            | Calcium/calmodulin-dependent protein kinase type 1D (EC 2.7.11.17) (CaM kinase I delta) (CaM kinase ID) (CaM-KI delta) (CaMKI delta) (CaMKID) (CaMKI-like protein kinase) (CKLiK)                                                                                                                              |
| Q8IUA7 | ABCA9                                    | ATP-binding cassette sub-family A member 9                                                                                                                                                                                                                                                                     |
| Q8IUH3 | RBM45 DRB1 DRBP1                         | RNA-binding protein 45 (Developmentally-regulated RNA-binding protein 1) (RB-1) (RNA-binding motif protein 45)                                                                                                                                                                                                 |
| Q8IUH4 | ZDHHC13 HIP14L HIP3RP                    | Palmitoyltransferase ZDHHC13 (EC 2.3.1.225) (Huntingtin-interacting protein 14-related protein) (HIP14-related protein) (Huntingtin-interacting protein HIP3RP) (Putative MAPK-activating protein PM03) (Putative NF-kappa-B-activating protein 209) (Zinc finger DHHC domain-containing protein 13) (DHHC-13) |
| Q8IUH5 | ZDHHC17 HIP14 HIP3 HYPH KIAA0946 HSPC294 | Palmitoyltransferase ZDHHC17 (EC 2.3.1.225) (Huntingtin yeast partner H)                                                                                                                                                                                                                                       |



|        |                                          |                                                                                                                                                                                                                                                                           |
|--------|------------------------------------------|---------------------------------------------------------------------------------------------------------------------------------------------------------------------------------------------------------------------------------------------------------------------------|
|        |                                          | (Huntingtin-interacting protein 14) (HIP-14) (Huntingtin-interacting protein 3) (HIP-3) (Huntingtin-interacting protein H) (Putative MAPK-activating protein PM11) (Putative NF-kappa-B-activating protein 205) (Zinc finger DHHC domain-containing protein 17) (DHHC-17) |
| Q8IUX4 | APOBEC3F                                 | DNA dC->dU-editing enzyme APOBEC-3F (EC 3.5.4.-) (Apolipoprotein B mRNA-editing enzyme catalytic polypeptide-like 3F) (A3F)                                                                                                                                               |
| Q8IV35 | WDR49                                    | WD repeat-containing protein 49                                                                                                                                                                                                                                           |
| Q8IV42 | PSTK C10orf89                            | L-seryl-tRNA(Sec) kinase (EC 2.7.1.164) (O-phosphoseryl-tRNA(Sec) kinase)                                                                                                                                                                                                 |
| Q8IV48 | ERI1 3'EXO THEX1                         | 3'-5' exoribonuclease 1 (EC 3.1.-.-) (3'-5' exonuclease ERI1) (Eri-1 homolog) (Histone mRNA 3'-end-specific exoribonuclease) (Histone mRNA 3'-exonuclease 1) (Protein 3'hExo) (HEXO)                                                                                      |
| Q8IVC4 | ZNF584                                   | Zinc finger protein 584                                                                                                                                                                                                                                                   |
| Q8IVF6 | ANKRD18A KIAA2015                        | Ankyrin repeat domain-containing protein 18A                                                                                                                                                                                                                              |
| Q8IVH8 | MAP4K3 RAB8IPL1                          | Mitogen-activated protein kinase kinase kinase 3 (EC 2.7.11.1) (Germinal center kinase-related protein kinase) (GLK) (MAPK/ERK kinase kinase kinase 3) (MEK kinase kinase 3) (MEKKK 3)                                                                                    |
| Q8IVP9 | ZNF547                                   | Zinc finger protein 547                                                                                                                                                                                                                                                   |
| Q8IVW4 | CDKL3 NKIAMRE                            | Cyclin-dependent kinase-like 3 (EC 2.7.11.22) (Serine/threonine-protein kinase NKIAMRE)                                                                                                                                                                                   |
| Q8IW40 | CCDC103                                  | Coiled-coil domain-containing protein 103                                                                                                                                                                                                                                 |
| Q8IW41 | MAPKAPK5 PRAK                            | MAP kinase-activated protein kinase 5 (MAPK-activated protein kinase 5) (MAPKAP kinase 5) (MAPKAP-K5) (MAPKAPK-5) (MK-5) (MK5) (EC 2.7.11.1) (p38-regulated/activated protein kinase) (PRAK)                                                                              |
| Q8IW52 | SLITRK4                                  | SLIT and NTRK-like protein 4                                                                                                                                                                                                                                              |
| Q8IWA0 | WDR75 UTP17                              | WD repeat-containing protein 75                                                                                                                                                                                                                                           |
| Q8IWB7 | WDFY1 KIAA1435 WDF1 ZFYVE17              | WD repeat and FYVE domain-containing protein 1 (FENS-1) (Phosphoinositide-binding protein 1) (WD40- and FYVE domain-containing protein 1) (Zinc finger FYVE domain-containing protein 17)                                                                                 |
| Q8IWQ3 | BRSK2 C11orf7 PEN11B SADA STK29 HUSSY-12 | Serine/threonine-protein kinase BRSK2 (EC 2.7.11.1) (Brain-selective kinase 2) (EC 2.7.11.26) (Brain-specific serine/threonine-protein kinase 2) (BR serine/threonine-protein kinase 2) (Serine/threonine-protein kinase 29) (Serine/threonine-protein kinase SAD-A)      |
| Q8IWT0 | ZBTB8OS ARCH                             | Protein archease (Protein ZBTB8OS) (Zinc finger and BTB domain-containing opposite strand protein 8)                                                                                                                                                                      |
| Q8IWX8 | CHERP DAN26 SCAF6                        | Calcium homeostasis endoplasmic reticulum protein (ERPROT 213-21) (SR-related CTD-associated factor 6)                                                                                                                                                                    |

|        |                                              |                                                                                                                                                                                                                                                                                                                                                                                                                                            |
|--------|----------------------------------------------|--------------------------------------------------------------------------------------------------------------------------------------------------------------------------------------------------------------------------------------------------------------------------------------------------------------------------------------------------------------------------------------------------------------------------------------------|
| Q8IWZ3 | ANKHD1 KIAA1085 MASK VBARP PP2500            | Ankyrin repeat and KH domain-containing protein 1 (HIV-1 Vpr-binding ankyrin repeat protein) (Multiple ankyrin repeats single KH domain) (hMASK)                                                                                                                                                                                                                                                                                           |
| Q8IWZ8 | SUGP1 SF4                                    | SURP and G-patch domain-containing protein 1 (RNA-binding protein RBP) (Splicing factor 4)                                                                                                                                                                                                                                                                                                                                                 |
| Q8IX01 | SUGP2 KIAA0365 SFRS14                        | SURP and G-patch domain-containing protein 2 (Arginine/serine-rich-splicing factor 14) (Splicing factor, arginine/serine-rich 14)                                                                                                                                                                                                                                                                                                          |
| Q8IX12 | CCAR1 CARP1 DIS                              | Cell division cycle and apoptosis regulator protein 1 (Cell cycle and apoptosis regulatory protein 1) (CARP-1) (Death inducer with SAP domain)                                                                                                                                                                                                                                                                                             |
| Q8IX18 | DHX40 DDX40 ARG147                           | Probable ATP-dependent RNA helicase DHX40 (EC 3.6.4.13) (DEAH box protein 40) (Protein PAD)                                                                                                                                                                                                                                                                                                                                                |
| Q8IXA5 | SPACA3 LYC3 LYZL3 SLLP1 SPRASA UNQ424/PRO862 | Sperm acrosome membrane-associated protein 3 (Cancer/testis antigen 54) (CT54) (Lysozyme-like acrosomal sperm-specific secretory protein ALLP-17) (Lysozyme-like protein 3) (Sperm lysozyme-like protein 1) (Sperm protein reactive with antisperm antibodies) (Sperm protein reactive with ASA) [Cleaved into: Sperm acrosome membrane-associated protein 3, membrane form; Sperm acrosome membrane-associated protein 3, processed form] |
| Q8IXM3 | MRPL41 BMRP MRPL27 RPML27 PIG3               | 39S ribosomal protein L41, mitochondrial (L41mt) (MRP-L41) (39S ribosomal protein L27 homolog) (Bcl-2-interacting mitochondrial ribosomal protein L41) (Cell proliferation-inducing gene 3 protein) (MRP-L27 homolog)                                                                                                                                                                                                                      |
| Q8IXT5 | RBM12B                                       | RNA-binding protein 12B (RNA-binding motif protein 12B)                                                                                                                                                                                                                                                                                                                                                                                    |
| Q8IXW5 | RPAP2 C1orf82                                | Putative RNA polymerase II subunit B1 CTD phosphatase RPAP2 (EC 3.1.3.16) (RNA polymerase II-associated protein 2)                                                                                                                                                                                                                                                                                                                         |
| Q8IY21 | DDX60                                        | Probable ATP-dependent RNA helicase DDX60 (EC 3.6.4.13) (DEAD box protein 60)                                                                                                                                                                                                                                                                                                                                                              |
| Q8IY37 | DHX37 DDX37 KIAA1517                         | Probable ATP-dependent RNA helicase DHX37 (EC 3.6.4.13) (DEAH box protein 37)                                                                                                                                                                                                                                                                                                                                                              |
| Q8IY67 | RAVER1 KIAA1978                              | Ribonucleoprotein PTB-binding 1 (Protein raver-1)                                                                                                                                                                                                                                                                                                                                                                                          |
| Q8IY81 | FTSJ3 SB92                                   | pre-rRNA processing protein FTSJ3 (EC 2.1.1.-) (2'-O-ribose RNA methyltransferase SPB1 homolog) (Protein ftsJ homolog 3) (Putative rRNA methyltransferase 3)                                                                                                                                                                                                                                                                               |
| Q8IY84 | NIM1K NIM1                                   | Serine/threonine-protein kinase NIM1 (EC 2.7.11.1) (NIM1 serine/threonine-protein kinase)                                                                                                                                                                                                                                                                                                                                                  |
| Q8IYB7 | DIS3L2 FAM6A                                 | DIS3-like exonuclease 2 (hDIS3L2) (EC 3.1.13.-)                                                                                                                                                                                                                                                                                                                                                                                            |

|        |                                   |                                                                                                                                                                                                                                       |
|--------|-----------------------------------|---------------------------------------------------------------------------------------------------------------------------------------------------------------------------------------------------------------------------------------|
| Q8IYB8 | SUPV3L1 SUV3                      | ATP-dependent RNA helicase SUPV3L1, mitochondrial (EC 3.6.4.13) (Suppressor of var1 3-like protein 1) (SUV3-like protein 1)                                                                                                           |
| Q8IYB9 | ZNF595                            | Zinc finger protein 595                                                                                                                                                                                                               |
| Q8IYD1 | GSPT2 ERF3B                       | Eukaryotic peptide chain release factor GTP-binding subunit ERF3B (Eukaryotic peptide chain release factor subunit 3b) (eRF3b) (G1 to S phase transition protein 2 homolog)                                                           |
| Q8IYD8 | FANCM KIAA1596                    | Fanconi anemia group M protein (Protein FACM) (EC 3.6.4.13) (ATP-dependent RNA helicase FANCM) (Fanconi anemia-associated polypeptide of 250 kDa) (FAAP250) (Protein Hef ortholog)                                                    |
| Q8IYI8 | ZNF440                            | Zinc finger protein 440                                                                                                                                                                                                               |
| Q8IYN0 | ZNF100                            | Zinc finger protein 100                                                                                                                                                                                                               |
| Q8IYP2 | PRSS58 TRY1 TRYX3 UNQ2540/PRO6090 | Serine protease 58 (EC 3.4.21.4) (Trypsin-X3)                                                                                                                                                                                         |
| Q8IYT2 | CMTR2 AFT FTSJD1                  | Cap-specific mRNA (nucleoside-2'-O-)-methyltransferase 2 (EC 2.1.1.296) (Cap methyltransferase 2) (Cap2 2'O-ribose methyltransferase 2) (HMTTr2) (MTr2) (FtsJ methyltransferase domain-containing protein 1) (Protein adrift homolog) |
| Q8IYT8 | ULK2 KIAA0623                     | Serine/threonine-protein kinase ULK2 (EC 2.7.11.1) (Unc-51-like kinase 2)                                                                                                                                                             |
| Q8IYU2 | HACE1 KIAA1320                    | E3 ubiquitin-protein ligase HACE1 (EC 6.3.2.-) (HECT domain and ankyrin repeat-containing E3 ubiquitin-protein ligase 1)                                                                                                              |
| Q8IYX0 | ZNF679                            | Zinc finger protein 679                                                                                                                                                                                                               |
| Q8IYX4 | DND1 RBMS4                        | Dead end protein homolog 1 (RNA-binding motif, single-stranded-interacting protein 4)                                                                                                                                                 |
| Q8IZ69 | TRMT2A HTF9C                      | tRNA (uracil-5-)-methyltransferase homolog A (EC 2.1.1.-) (HpaII tiny fragments locus 9c protein)                                                                                                                                     |
| Q8IZ73 | RPUSD2 C15orf19                   | RNA pseudouridylate synthase domain-containing protein 2                                                                                                                                                                              |
| Q8IZD4 | DCP1B                             | mRNA-decapping enzyme 1B (EC 3.-.-.-)                                                                                                                                                                                                 |
| Q8IZH2 | XRN1 SEP1                         | 5'-3' exoribonuclease 1 (EC 3.1.13.-) (Strand-exchange protein 1 homolog)                                                                                                                                                             |
| Q8IZL8 | PELP1 HMX3 MNAR                   | Proline-, glutamic acid- and leucine-rich protein 1 (Modulator of non-genomic activity of estrogen receptor) (Transcription factor HMX3)                                                                                              |
| Q8IZL9 | CDK20 CCRK CDCH                   | Cyclin-dependent kinase 20 (EC 2.7.11.22) (CDK-activating kinase p42) (CAK-kinase p42) (Cell cycle-related kinase) (Cell division protein kinase 20) (Cyclin-dependent protein kinase H) (Cyclin-kinase-activating kinase p42)        |
| Q8IZQ1 | WDFY3 KIAA0993                    | WD repeat and FYVE domain-containing protein 3 (Autophagy-linked FYVE protein) (Alfy)                                                                                                                                                 |
| Q8IZU2 | WDR17                             | WD repeat-containing protein 17                                                                                                                                                                                                       |
| Q8IZY2 | ABCA7                             | ATP-binding cassette sub-family A member 7 (ABCA-SSN) (Autoantigen SS-N) (Macrophage ABC transporter)                                                                                                                                 |

|        |                                     |                                                                                                                                                                                                                                                                |
|--------|-------------------------------------|----------------------------------------------------------------------------------------------------------------------------------------------------------------------------------------------------------------------------------------------------------------|
| Q8N0X2 | SPAG16 PF20                         | Sperm-associated antigen 16 protein (Pf20 protein homolog)                                                                                                                                                                                                     |
| Q8N0Z8 | PUSL1                               | tRNA pseudouridine synthase-like 1 (EC 5.4.99.-) (tRNA pseudouridylylase synthase-like 1) (tRNA-uridine isomerase-like 1)                                                                                                                                      |
| Q8N136 | DAW1 WDR69                          | Dynein assembly factor with WDR repeat domains 1 (Outer row dynein assembly protein 16 homolog) (WD repeat-containing protein 69)                                                                                                                              |
| Q8N139 | ABCA6                               | ATP-binding cassette sub-family A member 6                                                                                                                                                                                                                     |
| Q8N141 | ZFP82 KIAA1948 ZNF545               | Zinc finger protein 82 homolog (Zfp-82) (Zinc finger protein 545)                                                                                                                                                                                              |
| Q8N145 | LGI3 LGIL4 UNQ8190/PRO23199         | Leucine-rich repeat LGI family member 3 (LGI1-like protein 4) (Leucine-rich glioma-inactivated protein 3)                                                                                                                                                      |
| Q8N157 | AHI1                                | Jouberin (Abelson helper integration site 1 protein homolog) (AHI-1)                                                                                                                                                                                           |
| Q8N163 | CCAR2 DBC1 KIAA1967                 | Cell cycle and apoptosis regulator protein 2 (Cell division cycle and apoptosis regulator protein 2) (DBIRD complex subunit KIAA1967) (Deleted in breast cancer gene 1 protein) (DBC-1) (DBC.1) (NET35) (p30 DBC)                                              |
| Q8N1B3 | FAM58A                              | Cyclin-related protein FAM58A (CDK10-activating cyclin) (Cyclin-M)                                                                                                                                                                                             |
| Q8N1G2 | CMTR1 FTSJD2 KIAA0082 MTR1          | Cap-specific mRNA (nucleoside-2'-O-)-methyltransferase 1 (EC 2.1.1.57) (Cap methyltransferase 1) (Cap1 2'O-ribose methyltransferase 1) (MTr1) (hMTr1) (FtsJ methyltransferase domain-containing protein 2) (Interferon-stimulated gene 95 kDa protein) (ISG95) |
| Q8N1V2 | CFAP52 WDR16 WDRPUH                 | Cilia- and flagella-associated protein 52 (WD repeat-containing protein 16) (WD40-repeat protein up-regulated in HCC)                                                                                                                                          |
| Q8N1W2 | ZNF710                              | Zinc finger protein 710                                                                                                                                                                                                                                        |
| Q8N283 | ANKRD35                             | Ankyrin repeat domain-containing protein 35                                                                                                                                                                                                                    |
| Q8N2I2 | ZNF619                              | Zinc finger protein 619                                                                                                                                                                                                                                        |
| Q8N2M8 | CLASRP SFRS16 SWAP2 UNQ2428/PRO4988 | CLK4-associating serine/arginine rich protein (Splicing factor, arginine/serine-rich 16) (Suppressor of white-apricot homolog 2)                                                                                                                               |
| Q8N2N9 | ANKRD36B                            | Ankyrin repeat domain-containing protein 36B (CLL-associated antigen KW-1)                                                                                                                                                                                     |
| Q8N302 | AGGF1 GPATC7 GPATCH7 VG5Q           | Angiogenic factor with G patch and FHA domains 1 (Angiogenic factor VG5Q) (hVG5Q) (G patch domain-containing protein 7) (Vasculogenesis gene on 5q protein)                                                                                                    |
| Q8N3C0 | ASCC3 HELIC1                        | Activating signal cointegrator 1 complex subunit 3 (EC 3.6.4.12) (ASC-1 complex subunit p200) (ASC1p200) (Helicase, ATP binding 1) (Trip4 complex subunit p200)                                                                                                |
| Q8N3D4 | EHBP1L1                             | EH domain-binding protein 1-like protein 1                                                                                                                                                                                                                     |
| Q8N3J2 | METTL4                              | Methyltransferase-like protein 4 (EC 2.1.1.-)                                                                                                                                                                                                                  |

|        |                                                 |                                                                                                                                                                                                                                                         |
|--------|-------------------------------------------------|---------------------------------------------------------------------------------------------------------------------------------------------------------------------------------------------------------------------------------------------------------|
| Q8N3J9 | ZNF664 ZFOC1 ZNF196                             | Zinc finger protein 664 (Zinc finger protein 176) (Zinc finger protein from organ of Corti)                                                                                                                                                             |
| Q8N3Y1 | FBXW8 FBW6 FBW8 FBX29 FBXO29 FBXW6              | F-box/WD repeat-containing protein 8 (F-box and WD-40 domain-containing protein 8) (F-box only protein 29)                                                                                                                                              |
| Q8N442 | GUF1                                            | Translation factor GUF1, mitochondrial (EC 3.6.5.-) (Elongation factor 4 homolog) (EF-4) (GTPase GUF1) (Ribosomal back-translocase)                                                                                                                     |
| Q8N4C8 | MINK1 B55 MAP4K6 MINK YSK2 ZC3                  | Misshapen-like kinase 1 (EC 2.7.11.1) (GCK family kinase MiNK) (MAPK/ERK kinase kinase kinase 6) (MEK kinase kinase 6) (MEKKK 6) (Misshapen/NIK-related kinase) (Mitogen-activated protein kinase kinase kinase kinase 6)                               |
| Q8N4S9 | MARVELD2 TRIC                                   | MARVEL domain-containing protein 2 (Tricellulin)                                                                                                                                                                                                        |
| Q8N4W9 | ZNF808                                          | Zinc finger protein 808                                                                                                                                                                                                                                 |
| Q8N568 | DCLK2 DCAMKL2 DCDC3B DCK2                       | Serine/threonine-protein kinase DCLK2 (EC 2.7.11.1) (CaMK-like CREB regulatory kinase 2) (CL2) (CLICK-II) (CLICK2) (Doublecortin domain-containing protein 3B) (Doublecortin-like and CAM kinase-like 2) (Doublecortin-like kinase 2)                   |
| Q8N587 | ZNF561                                          | Zinc finger protein 561                                                                                                                                                                                                                                 |
| Q8N5A5 | ZGPAT GPATC6 GPATCH6 KIAA1847 ZC3H9 ZC3HDC9 ZIP | Zinc finger CCCH-type with G patch domain-containing protein (G patch domain-containing protein 6) (Zinc finger CCCH domain-containing protein 9) (Zinc finger and G patch domain-containing protein)                                                   |
| Q8N5D0 | WDTC1 KIAA1037                                  | WD and tetratricopeptide repeats protein 1                                                                                                                                                                                                              |
| Q8N5N7 | MRPL50                                          | 39S ribosomal protein L50, mitochondrial (L50mt) (MRP-L50)                                                                                                                                                                                              |
| Q8N5S9 | CAMKK1 CAMKKA                                   | Calcium/calmodulin-dependent protein kinase kinase 1 (CaM-KK 1) (CaM-kinase kinase 1) (CaMKK 1) (EC 2.7.11.17) (CaM-kinase IV kinase) (Calcium/calmodulin-dependent protein kinase kinase alpha) (CaM-KK alpha) (CaM-kinase kinase alpha) (CaMKK alpha) |
| Q8N5X7 | EIF4E3                                          | Eukaryotic translation initiation factor 4E type 3 (eIF-4E type 3) (eIF-4E3) (eIF4E type 3) (eIF4E-3)                                                                                                                                                   |
| Q8N684 | CPSF7                                           | Cleavage and polyadenylation specificity factor subunit 7 (Cleavage and polyadenylation specificity factor 59 kDa subunit) (CFIm59) (CPSF 59 kDa subunit) (Pre-mRNA cleavage factor Im 59 kDa subunit)                                                  |
| Q8N6D5 | ANKRD29                                         | Ankyrin repeat domain-containing protein 29                                                                                                                                                                                                             |
| Q8N6W0 | CELF5 BRUNOL5                                   | CUGBP Elav-like family member 5 (CELF-5) (Bruno-like protein 5) (CUG-BP-and ETR-3-like factor 5) (RNA-binding protein BRUNOL-5)                                                                                                                         |

|        |                              |                                                                                                                                                                                                        |
|--------|------------------------------|--------------------------------------------------------------------------------------------------------------------------------------------------------------------------------------------------------|
| Q8N6Y2 | LRRC17 P37NB UNQ3076/PRO9909 | Leucine-rich repeat-containing protein 17 (p37NB)                                                                                                                                                      |
| Q8N782 | ZNF525 KIAA1979              | Zinc finger protein 525                                                                                                                                                                                |
| Q8N7C7 | RNF148                       | RING finger protein 148                                                                                                                                                                                |
| Q8N7H5 | PAF1 PD2                     | RNA polymerase II-associated factor 1 homolog (hPAF1) (Pancreatic differentiation protein 2)                                                                                                           |
| Q8N7K0 | ZNF433                       | Zinc finger protein 433                                                                                                                                                                                |
| Q8N7M2 | ZNF283                       | Zinc finger protein 283 (Zinc finger protein HZF19)                                                                                                                                                    |
| Q8N7Q3 | ZNF676                       | Zinc finger protein 676                                                                                                                                                                                |
| Q8N7X1 | RBMXL3 CXorf55               | RNA-binding motif protein, X-linked-like-3                                                                                                                                                             |
| Q8N7Z5 | ANKRD31                      | Putative ankyrin repeat domain-containing protein 31                                                                                                                                                   |
| Q8N823 | ZNF611                       | Zinc finger protein 611                                                                                                                                                                                |
| Q8N883 | ZNF614                       | Zinc finger protein 614                                                                                                                                                                                |
| Q8N895 | ZNF366                       | Zinc finger protein 366                                                                                                                                                                                |
| Q8N8A2 | ANKRD44                      | Serine/threonine-protein phosphatase 6 regulatory ankyrin repeat subunit B (PP6-ARS-B) (Serine/threonine-protein phosphatase 6 regulatory subunit ARS-B) (Ankyrin repeat domain-containing protein 44) |
| Q8N8A6 | DDX51                        | ATP-dependent RNA helicase DDX51 (EC 3.6.4.13) (DEAD box protein 51)                                                                                                                                   |
| Q8N8J6 | ZNF615                       | Zinc finger protein 615                                                                                                                                                                                |
| Q8N8L2 | ZNF491                       | Zinc finger protein 491                                                                                                                                                                                |
| Q8N8Z8 | ZNF441                       | Zinc finger protein 441                                                                                                                                                                                |
| Q8N954 | GPATCH11 CCDC75              | G patch domain-containing protein 11 (Coiled-coil domain-containing protein 75)                                                                                                                        |
| Q8N967 | LRTM2                        | Leucine-rich repeat and transmembrane domain-containing protein 2                                                                                                                                      |
| Q8N972 | ZNF709                       | Zinc finger protein 709                                                                                                                                                                                |
| Q8N983 | MRPL43                       | 39S ribosomal protein L43, mitochondrial (L43mt) (MRP-L43) (Mitochondrial ribosomal protein bMRP36a)                                                                                                   |
| Q8N988 | ZNF557                       | Zinc finger protein 557                                                                                                                                                                                |
| Q8N9B4 | ANKRD42                      | Ankyrin repeat domain-containing protein 42                                                                                                                                                            |
| Q8N9F8 | ZNF454                       | Zinc finger protein 454                                                                                                                                                                                |
| Q8N9H8 | EXD3 HBE269                  | Exonuclease mut-7 homolog (EC 3.1.-.-) (Exonuclease 3'-5' domain-containing protein 3)                                                                                                                 |
| Q8N9K5 | ZNF565                       | Zinc finger protein 565                                                                                                                                                                                |
| Q8N9L1 | ZIC4                         | Zinc finger protein ZIC 4 (Zinc finger protein of the cerebellum 4)                                                                                                                                    |
| Q8N9N2 | ASCC1 CGI-18                 | Activating signal cointegrator 1 complex subunit 1 (ASC-1 complex subunit p50) (Trip4 complex subunit p50)                                                                                             |
| Q8N9N7 | LRRC57                       | Leucine-rich repeat-containing protein 57                                                                                                                                                              |
| Q8N9V3 | WDSUB1 WDSAM1                | WD repeat, SAM and U-box domain-containing protein 1                                                                                                                                                   |
| Q8N9W6 | BOLL BOULE                   | Protein boule-like                                                                                                                                                                                     |

|        |                                      |                                                                                                                                                                                                         |
|--------|--------------------------------------|---------------------------------------------------------------------------------------------------------------------------------------------------------------------------------------------------------|
| Q8N9Z0 | ZNF610                               | Zinc finger protein 610                                                                                                                                                                                 |
| Q8NA23 | WDR31                                | WD repeat-containing protein 31                                                                                                                                                                         |
| Q8NA42 | ZNF383 HSD17                         | Zinc finger protein 383                                                                                                                                                                                 |
| Q8NA58 | PNLDC1                               | Poly(A)-specific ribonuclease PARN-like domain-containing protein 1                                                                                                                                     |
| Q8NAA4 | ATG16L2 WDR80                        | Autophagy-related protein 16-2 (APG16-like 2) (WD repeat-containing protein 80)                                                                                                                         |
| Q8NAF0 | ZNF579                               | Zinc finger protein 579                                                                                                                                                                                 |
| Q8NAT2 | TDRD5                                | Tudor domain-containing protein 5                                                                                                                                                                       |
| Q8NAV1 | PRPF38A                              | Pre-mRNA-splicing factor 38A                                                                                                                                                                            |
| Q8NB42 | ZNF527 KIAA1829                      | Zinc finger protein 527                                                                                                                                                                                 |
| Q8NB46 | ANKRD52                              | Serine/threonine-protein phosphatase 6 regulatory ankyrin repeat subunit C (PP6-ARS-C) (Serine/threonine-protein phosphatase 6 regulatory subunit ARS-C) (Ankyrin repeat domain-containing protein 52)  |
| Q8NB50 | ZFP62                                | Zinc finger protein 62 homolog (Zfp-62)                                                                                                                                                                 |
| Q8NBJ9 | SIDT2 CGI-40 PSEC0072 UNQ685/PRO1325 | SID1 transmembrane family member 2                                                                                                                                                                      |
| Q8NBT0 | POC1A WDR51A                         | POC1 centriolar protein homolog A (Pix2) (Proteome of centriole protein 1A) (WD repeat-containing protein 51A)                                                                                          |
| Q8NC42 | RNF149 DNAPTP2                       | E3 ubiquitin-protein ligase RNF149 (EC 6.3.2.-) (DNA polymerase-transactivated protein 2) (RING finger protein 149)                                                                                     |
| Q8NC51 | SERBP1 PAIRBP1 CGI-55                | Plasminogen activator inhibitor 1 RNA-binding protein (PAI1 RNA-binding protein 1) (PAI-RBP1) (SERPINE1 mRNA-binding protein 1)                                                                         |
| Q8NCB2 | CAMKV                                | CaM kinase-like vesicle-associated protein                                                                                                                                                              |
| Q8NCE0 | TSEN2 SEN2                           | tRNA-splicing endonuclease subunit Sen2 (EC 4.6.1.16) (tRNA-intron endonuclease Sen2) (HsSen2)                                                                                                          |
| Q8NCK3 | ZNF485                               | Zinc finger protein 485                                                                                                                                                                                 |
| Q8NCV1 | ADAD2 TENRL                          | Adenosine deaminase domain-containing protein 2 (Testis nuclear RNA-binding protein-like)                                                                                                               |
| Q8NCW5 | APOA1BP AIBP YJEFN1                  | NAD(P)H-hydrate epimerase (EC 5.1.99.6) (Apolipoprotein A-I-binding protein) (AIBP) (NAD(P)HX epimerase) (YjeF N-terminal domain-containing protein 1) (YjeF_N1)                                        |
| Q8NDF8 | PAPD5                                | Non-canonical poly(A) RNA polymerase PAPD5 (EC 2.7.7.19) (PAP-associated domain-containing protein 5) (Terminal uridylyltransferase 3) (TUTase 3) (Topoisomerase-related function protein 4-2) (TRF4-2) |
| Q8NDG6 | TDRD9 C14orf75                       | Putative ATP-dependent RNA helicase TDRD9 (EC 3.6.4.13) (Tudor domain-containing protein 9)                                                                                                             |
| Q8NDI1 | EHBP1 KIAA0903 NACSIN                | EH domain-binding protein 1                                                                                                                                                                             |
| Q8NDP4 | ZNF439                               | Zinc finger protein 439                                                                                                                                                                                 |
| Q8NDQ6 | ZNF540 Nbla10512                     | Zinc finger protein 540                                                                                                                                                                                 |

|        |                      |                                                                                                                                                                                   |
|--------|----------------------|-----------------------------------------------------------------------------------------------------------------------------------------------------------------------------------|
| Q8NDT2 | RBM15B OTT3          | Putative RNA-binding protein 15B (One-twenty two protein 3) (HuOTT3) (RNA-binding motif protein 15B)                                                                              |
| Q8NE35 | CPEB3 KIAA0940       | Cytoplasmic polyadenylation element-binding protein 3 (CPE-BP3) (CPE-binding protein 3) (hCPEB-3)                                                                                 |
| Q8NE71 | ABCF1 ABC50          | ATP-binding cassette sub-family F member 1 (ATP-binding cassette 50) (TNF-alpha-stimulated ABC protein)                                                                           |
| Q8NEJ9 | NGDN C14orf120       | Neuroguidin (Centromere accumulated nuclear protein 1) (CANu1) (EIF4E-binding protein)                                                                                            |
| Q8NEK5 | ZNF548               | Zinc finger protein 548                                                                                                                                                           |
| Q8NEM1 | ZNF680               | Zinc finger protein 680                                                                                                                                                           |
| Q8NEP9 | ZNF555               | Zinc finger protein 555                                                                                                                                                           |
| Q8NEV1 | CSNK2A3 CSNK2A1P     | Casein kinase II subunit alpha 3 (CK II alpha 3) (EC 2.7.11.1) (Casein kinase II alpha 1 polypeptide pseudogene)                                                                  |
| Q8NEV4 | MYO3A                | Myosin-IIIa (EC 2.7.11.1)                                                                                                                                                         |
| Q8NF86 | PRSS33               | Serine protease 33 (EC 3.4.21.-) (Serine protease EOS)                                                                                                                            |
| Q8NF99 | ZNF397 ZNF47 ZSCAN15 | Zinc finger protein 397 (Zinc finger and SCAN domain-containing protein 15) (Zinc finger protein 47)                                                                              |
| Q8NFD2 | ANKK1 PKK2 SGK288    | Ankyrin repeat and protein kinase domain-containing protein 1 (EC 2.7.11.1) (Protein kinase PKK2) (Sugen kinase 288) (SgK288) (X-kinase)                                          |
| Q8NFH5 | NUP35 MP44 NUP53     | Nucleoporin NUP53 (35 kDa nucleoporin) (Mitotic phosphoprotein 44) (MP-44) (Nuclear pore complex protein Nup53) (Nucleoporin Nup35)                                               |
| Q8NG66 | NEK11                | Serine/threonine-protein kinase Nek11 (EC 2.7.11.1) (Never in mitosis A-related kinase 11) (NimA-related protein kinase 11)                                                       |
| Q8NHM4 | PRSS3P2 T6 TRY6      | Putative trypsin-6 (EC 3.4.21.4) (Serine protease 3 pseudogene 2) (Trypsinogen C)                                                                                                 |
| Q8NHQ9 | DDX55 KIAA1595       | ATP-dependent RNA helicase DDX55 (EC 3.6.4.13) (DEAD box protein 55)                                                                                                              |
| Q8NHU6 | TDRD7 PCTAIRE2BP     | Tudor domain-containing protein 7 (PCTAIRE2-binding protein) (Tudor repeat associator with PCTAIRE-2) (Trap)                                                                      |
| Q8NHV4 | NEDD1                | Protein NEDD1 (Neural precursor cell expressed developmentally down-regulated protein 1) (NEDD-1)                                                                                 |
| Q8NHW5 | RPLP0P6              | 60S acidic ribosomal protein P0-like                                                                                                                                              |
| Q8NHY2 | RFWD2 COP1 RNF200    | E3 ubiquitin-protein ligase RFWD2 (EC 6.3.2.-) (Constitutive photomorphogenesis protein 1 homolog) (hCOP1) (RING finger and WD repeat domain protein 2) (RING finger protein 200) |
| Q8NHY6 | ZFP28 KIAA1431       | Zinc finger protein 28 homolog (Zfp-28) (Krueppel-like zinc finger factor X6)                                                                                                     |
| Q8NI27 | THOC2 CXorf3         | THO complex subunit 2 (Tho2) (hTREX120)                                                                                                                                           |
| Q8NI36 | WDR36                | WD repeat-containing protein 36 (T-cell activation WD repeat-containing protein) (TA-WDRP)                                                                                        |



|        |                               |                                                                                                                                                                                                                                                                                                   |
|--------|-------------------------------|---------------------------------------------------------------------------------------------------------------------------------------------------------------------------------------------------------------------------------------------------------------------------------------------------|
| Q8NI60 | ADCK3 CABC1 PP265             | Atypical kinase ADCK3, mitochondrial (EC 2.7.-.-) (Chaperone activity of bc1 complex-like) (Chaperone-ABC1-like) (aarF domain-containing protein kinase 3)                                                                                                                                        |
| Q8TA94 | ZNF563                        | Zinc finger protein 563                                                                                                                                                                                                                                                                           |
| Q8TAE8 | GADD45GIP1 MRPL59 PLINP1 PRG6 | Growth arrest and DNA damage-inducible proteins-interacting protein 1 (39S ribosomal protein L59, mitochondrial) (MRP-L59) (CKII beta-associating protein) (CR6-interacting factor 1) (CRIF1) (Papillomavirus L2-interacting nuclear protein 1) (PLINP) (PLINP-1) (p53-responsive gene 6 protein) |
| Q8TAF3 | WDR48 KIAA1449 UAF1           | WD repeat-containing protein 48 (USP1-associated factor 1) (WD repeat endosomal protein) (p80)                                                                                                                                                                                                    |
| Q8TAQ5 | ZNF420                        | Zinc finger protein 420                                                                                                                                                                                                                                                                           |
| Q8TAW3 | ZNF671                        | Zinc finger protein 671                                                                                                                                                                                                                                                                           |
| Q8TB69 | ZNF519                        | Zinc finger protein 519                                                                                                                                                                                                                                                                           |
| Q8TB72 | PUM2 KIAA0235 PUMH2           | Pumilio homolog 2 (Pumilio-2)                                                                                                                                                                                                                                                                     |
| Q8TBF4 | ZCRB1                         | Zinc finger CCHC-type and RNA-binding motif-containing protein 1 (U11/U12 small nuclear ribonucleoprotein 31 kDa protein) (U11/U12 snRNP 31 kDa protein) (U11/U12-31K)                                                                                                                            |
| Q8TBY0 | RBM46                         | Probable RNA-binding protein 46 (Cancer/testis antigen 68) (CT68) (RNA-binding motif protein 46)                                                                                                                                                                                                  |
| Q8TBZ6 | TRMT10A RG9MTD2               | tRNA methyltransferase 10 homolog A (EC 2.1.1.-) (RNA (guanine-9-)-methyltransferase domain-containing protein 2)                                                                                                                                                                                 |
| Q8TBZ8 | ZNF564                        | Zinc finger protein 564                                                                                                                                                                                                                                                                           |
| Q8TC21 | ZNF596                        | Zinc finger protein 596                                                                                                                                                                                                                                                                           |
| Q8TC44 | POC1B WDR51B                  | POC1 centriolar protein homolog B (Pix1) (Proteome of centriole protein 1B) (WD repeat-containing protein 51B)                                                                                                                                                                                    |
| Q8TC59 | PIWIL2 HILI                   | Piwi-like protein 2 (Cancer/testis antigen 80) (CT80)                                                                                                                                                                                                                                             |
| Q8TC84 | FANK1 HSD13 UNQ6504/PRO21382  | Fibronectin type 3 and ankyrin repeat domains protein 1                                                                                                                                                                                                                                           |
| Q8TCS8 | PNPT1 PNPASE                  | Polyribonucleotide nucleotidyltransferase 1, mitochondrial (EC 2.7.7.8) (3'-5' RNA exonuclease OLD35) (PNPase old-35) (Polynucleotide phosphorylase 1) (PNPase 1) (Polynucleotide phosphorylase-like protein)                                                                                     |
| Q8TD08 | MAPK15 ERK7 ERK8              | Mitogen-activated protein kinase 15 (MAP kinase 15) (MAPK 15) (EC 2.7.11.24) (Extracellular signal-regulated kinase 7) (ERK-7) (Extracellular signal-regulated kinase 8) (ERK-8)                                                                                                                  |
| Q8TD17 | ZNF398 KIAA1339 ZER6          | Zinc finger protein 398 (Zinc finger DNA-binding protein p52/p71)                                                                                                                                                                                                                                 |
| Q8TD19 | NEK9 KIAA1995 NEK8 NERCC      | Serine/threonine-protein kinase Nek9 (EC 2.7.11.1) (Nercc1 kinase) (Never in mitosis A-related kinase 9) (NimA-related protein                                                                                                                                                                    |

|        |                                     |                                                                                                                                                                                                                                                                                                  |
|--------|-------------------------------------|--------------------------------------------------------------------------------------------------------------------------------------------------------------------------------------------------------------------------------------------------------------------------------------------------|
|        |                                     | kinase 9) (NimA-related kinase 8) (Nek8)                                                                                                                                                                                                                                                         |
| Q8TD23 | ZNF675 TIZ                          | Zinc finger protein 675 (TRAF6-binding zinc finger protein) (TRAF6-inhibitory zinc finger protein)                                                                                                                                                                                               |
| Q8TDC3 | BRSK1 KIAA1811 SAD1 SADB            | Serine/threonine-protein kinase BRSK1 (EC 2.7.11.1) (Brain-selective kinase 1) (EC 2.7.11.26) (Brain-specific serine/threonine-protein kinase 1) (BR serine/threonine-protein kinase 1) (Serine/threonine-protein kinase SAD-B) (Synapses of Amphids Defective homolog 1) (SAD1 homolog) (hSAD1) |
| Q8TDD1 | DDX54                               | ATP-dependent RNA helicase DDX54 (EC 3.6.4.13) (ATP-dependent RNA helicase DP97) (DEAD box RNA helicase 97 kDa) (DEAD box protein 54)                                                                                                                                                            |
| Q8TDG4 | HELQ HEL308                         | Helicase POLQ-like (EC 3.6.4.12) (Mus308-like helicase) (POLQ-like helicase)                                                                                                                                                                                                                     |
| Q8TDJ6 | DMXL2 KIAA0856                      | DmX-like protein 2 (Rabconnectin-3)                                                                                                                                                                                                                                                              |
| Q8TDP1 | RNASEH2C AYP1                       | Ribonuclease H2 subunit C (RNase H2 subunit C) (Aicardi-Goutieres syndrome 3 protein) (AGS3) (RNase H1 small subunit) (Ribonuclease HI subunit C)                                                                                                                                                |
| Q8TDX7 | NEK7                                | Serine/threonine-protein kinase Nek7 (EC 2.7.11.1) (Never in mitosis A-related kinase 7) (NimA-related protein kinase 7)                                                                                                                                                                         |
| Q8TE02 | ELP5 C17orf81 DERP6 HSPC002 MSTP071 | Elongator complex protein 5 (Dermal papilla-derived protein 6) (S-phase 2 protein)                                                                                                                                                                                                               |
| Q8TE96 | DQX1                                | ATP-dependent RNA helicase DQX1 (EC 3.6.4.12) (DEAQ box polypeptide 1)                                                                                                                                                                                                                           |
| Q8TEA8 | DTD1 C20orf88 DUEB HARS2            | D-tyrosyl-tRNA(Tyr) deacylase 1 (EC 3.1.-.-) (DNA-unwinding element-binding protein B) (DUE-B) (Histidyl-tRNA synthase-related)                                                                                                                                                                  |
| Q8TEB1 | DCAF11 WDR23 GL014 PRO2389          | DDB1- and CUL4-associated factor 11 (WD repeat-containing protein 23)                                                                                                                                                                                                                            |
| Q8TEB7 | RNF128                              | E3 ubiquitin-protein ligase RNF128 (EC 6.3.2.-) (Gene related to anergy in lymphocytes protein) (GRAIL) (RING finger protein 128)                                                                                                                                                                |
| Q8TED0 | UTP15                               | U3 small nucleolar RNA-associated protein 15 homolog                                                                                                                                                                                                                                             |
| Q8TEQ6 | GEMIN5                              | Gem-associated protein 5 (Gemin5)                                                                                                                                                                                                                                                                |
| Q8TF20 | ZNF721 KIAA1982                     | Zinc finger protein 721                                                                                                                                                                                                                                                                          |
| Q8TF21 | ANKRD24 KIAA1981                    | Ankyrin repeat domain-containing protein 24                                                                                                                                                                                                                                                      |
| Q8TF32 | ZNF431 KIAA1969                     | Zinc finger protein 431                                                                                                                                                                                                                                                                          |
| Q8TF39 | ZNF483 KIAA1962 ZKSCAN16            | Zinc finger protein 483 (Zinc finger protein with KRAB and SCAN domains 16)                                                                                                                                                                                                                      |
| Q8TF45 | ZNF418 KIAA1956                     | Zinc finger protein 418                                                                                                                                                                                                                                                                          |
| Q8TF46 | DIS3L DIS3L1 KIAA1955               | DIS3-like exonuclease 1 (EC 3.1.13.-)                                                                                                                                                                                                                                                            |
| Q8TF47 | ZFP90 KIAA1954 ZNF756               | Zinc finger protein 90 homolog (Zfp-90) (Zinc finger protein 756)                                                                                                                                                                                                                                |
| Q8TF50 | ZNF526 KIAA1951                     | Zinc finger protein 526                                                                                                                                                                                                                                                                          |

|        |                                      |                                                                                                                                                                                                                                                        |
|--------|--------------------------------------|--------------------------------------------------------------------------------------------------------------------------------------------------------------------------------------------------------------------------------------------------------|
| Q8TF66 | LRRC15 LIB                           | Leucine-rich repeat-containing protein 15 (Leucine-rich repeat protein induced by beta-amyloid homolog) (hLib)                                                                                                                                         |
| Q8WTP8 | AEN ISG20L1 SBB158                   | Apoptosis-enhancing nuclease (EC 3.1.-.-) (Interferon-stimulated 20 kDa exonuclease-like 1)                                                                                                                                                            |
| Q8WTQ7 | GRK7 GPRK7                           | G protein-coupled receptor kinase 7 (EC 2.7.11.14) (EC 2.7.11.16) (G protein-coupled receptor kinase GRK7)                                                                                                                                             |
| Q8WTR7 | ZNF473 KIAA1141 ZFP100               | Zinc finger protein 473 (Zinc finger protein 100 homolog) (Zfp-100)                                                                                                                                                                                    |
| Q8WTT2 | NOC3L AD24 C10orf117 FAD24           | Nucleolar complex protein 3 homolog (NOC3 protein homolog) (Factor for adipocyte differentiation 24) (NOC3-like protein) (Nucleolar complex-associated protein 3-like protein)                                                                         |
| Q8WU08 | STK32A YANK1                         | Serine/threonine-protein kinase 32A (EC 2.7.11.1) (Yet another novel kinase 1)                                                                                                                                                                         |
| Q8WUA2 | PPIL4                                | Peptidyl-prolyl cis-trans isomerase-like 4 (PPIase) (EC 5.2.1.8) (Cyclophilin-like protein PPIL4) (Rotamase PPIL4)                                                                                                                                     |
| Q8WUA8 | TSKU E2IG4 LRRC54 TSK UNQ850/PRO1788 | Tsukushin (Tsukushi) (E2-induced gene 4 protein) (Leucine-rich repeat-containing protein 54)                                                                                                                                                           |
| Q8WUD4 | CCDC12                               | Coiled-coil domain-containing protein 12                                                                                                                                                                                                               |
| Q8WUE5 | CT55 CXorf48                         | Cancer/testis antigen 55 (Tumor antigen BJ-HCC-20)                                                                                                                                                                                                     |
| Q8WUF8 | FAM172A C5orf21                      | Protein FAM172A                                                                                                                                                                                                                                        |
| Q8WUM0 | NUP133                               | Nuclear pore complex protein Nup133 (133 kDa nucleoporin) (Nucleoporin Nup133)                                                                                                                                                                         |
| Q8WV37 | ZNF480                               | Zinc finger protein 480                                                                                                                                                                                                                                |
| Q8WVC0 | LEO1 RDL                             | RNA polymerase-associated protein LEO1 (Replicative senescence down-regulated leo1-like protein)                                                                                                                                                       |
| Q8WVM0 | TFB1M CGI-75                         | Dimethyladenosine transferase 1, mitochondrial (EC 2.1.1.-) (Mitochondrial 12S rRNA dimethylase 1) (Mitochondrial transcription factor B1) (h-mtTFB) (h-mtTFB1) (hTFB1M) (mtTFB1) (S-adenosylmethionine-6-N', N'-adenosyl(rRNA) dimethyltransferase 1) |
| Q8WVV9 | HNRNPLL HNRPLL SRRF BLOCK24          | Heterogeneous nuclear ribonucleoprotein L-like (hnRNPLL) (Stromal RNA-regulating factor)                                                                                                                                                               |
| Q8WVZ7 | RNF133                               | E3 ubiquitin-protein ligase RNF133 (EC 6.3.2.-) (RING finger protein 133)                                                                                                                                                                              |
| Q8WW01 | TSEN15 C1orf19 SEN15                 | tRNA-splicing endonuclease subunit Sen15 (SEN15 homolog) (HsSEN15) (tRNA-intron endonuclease Sen15)                                                                                                                                                    |
| Q8WW27 | APOBEC4 C1orf169                     | Putative C->U-editing enzyme APOBEC-4 (EC 3.5.4.-) (Apolipoprotein B mRNA-editing enzyme catalytic polypeptide-like 4)                                                                                                                                 |
| Q8WW33 | GTSF1 FAM112B                        | Gametocyte-specific factor 1 (Protein FAM112B)                                                                                                                                                                                                         |
| Q8WW36 | ZCCHC13                              | Zinc finger CCHC domain-containing protein 13                                                                                                                                                                                                          |
| Q8WWB5 | PIH1D2                               | PIH1 domain-containing protein 2                                                                                                                                                                                                                       |

|         |                                 |                                                                                                                                                                                                                 |
|---------|---------------------------------|-----------------------------------------------------------------------------------------------------------------------------------------------------------------------------------------------------------------|
| Q8WWF5  | ZNRF4 RNF204                    | Zinc/RING finger protein 4 (RING finger protein 204)                                                                                                                                                            |
| Q8WWH4  | ASZ1 ALP1 ANKL1 C7orf7 GASZ     | Ankyrin repeat, SAM and basic leucine zipper domain-containing protein 1 (Ankyrin-like protein 1) (Germ cell-specific ankyrin, SAM and basic leucine zipper domain-containing protein)                          |
| Q8WWH5  | TRUB1 PUS4                      | Probable tRNA pseudouridine synthase 1 (EC 5.4.99.-)                                                                                                                                                            |
| Q8WWQ0  | PHIP WDR11                      | PH-interacting protein (PHIP) (IRS-1 PH domain-binding protein) (WD repeat-containing protein 11)                                                                                                               |
| Q8WWY3  | PRPF31 PRP31                    | U4/U6 small nuclear ribonucleoprotein Prp31 (Pre-mRNA-processing factor 31) (Serologically defined breast cancer antigen NY-BR-99) (U4/U6 snRNP 61 kDa protein) (Protein 61K) (hPrp31)                          |
| Q8WWZ4  | ABCA10                          | ATP-binding cassette sub-family A member 10                                                                                                                                                                     |
| Q8WWZ7  | ABCA5 KIAA1888                  | ATP-binding cassette sub-family A member 5                                                                                                                                                                      |
| Q8WXA9  | SREK1 SFRS12 SRRP86             | Splicing regulatory glutamine/lysine-rich protein 1 (Serine/arginine-rich-splicing regulatory protein 86) (SRrp86) (Splicing factor, arginine/serine-rich 12) (Splicing regulatory protein 508) (SRrp508)       |
| Q8WXB4  | ZNF606 KIAA1852 ZNF328          | Zinc finger protein 606 (Zinc finger protein 328)                                                                                                                                                               |
| Q8WXD0  | RXFP2 GPR106 GREAT LGR8         | Relaxin receptor 2 (G-protein coupled receptor 106) (G-protein coupled receptor affecting testicular descent) (Leucine-rich repeat-containing G-protein coupled receptor 8) (Relaxin family peptide receptor 2) |
| Q8WXD9  | CASKIN1 KIAA1306                | Caskin-1 (CASK-interacting protein 1)                                                                                                                                                                           |
| Q8WXE0  | CASKIN2 KIAA1139                | Caskin-2 (CASK-interacting protein 2)                                                                                                                                                                           |
| Q8WXF0  | SRSF12 SFRS13B SFRS19 SRRP35    | Serine/arginine-rich splicing factor 12 (35 kDa SR repressor protein) (SRrp35) (Splicing factor, arginine/serine-rich 13B) (Splicing factor, arginine/serine-rich 19)                                           |
| Q8WXF1  | PSPC1 PSP1                      | Paraspeckle component 1 (Paraspeckle protein 1)                                                                                                                                                                 |
| Q8WXI3  | ASB10                           | Ankyrin repeat and SOCS box protein 10 (ASB-10)                                                                                                                                                                 |
| Q8W XK1 | ASB15                           | Ankyrin repeat and SOCS box protein 15 (ASB-15)                                                                                                                                                                 |
| Q8W XK3 | ASB13                           | Ankyrin repeat and SOCS box protein 13 (ASB-13)                                                                                                                                                                 |
| Q8WXR4  | MYO3B                           | Myosin-IIIb (EC 2.7.11.1)                                                                                                                                                                                       |
| Q8WY41  | NANOS1 NOS1                     | Nanos homolog 1 (NOS-1) (EC_Rep1a)                                                                                                                                                                              |
| Q8WYQ5  | DGCR8 C22orf12 DGCRK6 LP4941    | Microprocessor complex subunit DGCR8 (DiGeorge syndrome critical region 8)                                                                                                                                      |
| Q8WZ74  | CTTNBP2 C7orf8 CORTBP2 KIAA1758 | Cortactin-binding protein 2 (CortBP2)                                                                                                                                                                           |
| Q902F8  | ERV-K-8                         | Endogenous retrovirus group K member 8 Env polyprotein (EnvK6 protein) (Envelope polyprotein) (HERV-K115 envelope protein) (HERV-K_8p23.1)                                                                      |

|        |                                     |                                                                                                                                                                                                                                                                      |
|--------|-------------------------------------|----------------------------------------------------------------------------------------------------------------------------------------------------------------------------------------------------------------------------------------------------------------------|
|        |                                     | provirus ancestral Env polypeptide)<br>[Cleaved into: Surface protein (SU);<br>Transmembrane protein (TM)]                                                                                                                                                           |
| Q902F9 | HERVK_113                           | Endogenous retrovirus group K member<br>113 Env polypeptide (EnvK5 protein)<br>(Envelope polypeptide) (HERV-K113<br>envelope protein) (HERV-K_19p13.11<br>provirus ancestral Env polypeptide)<br>[Cleaved into: Surface protein (SU);<br>Transmembrane protein (TM)] |
| Q92466 | DDB2                                | DNA damage-binding protein 2 (DDB p48<br>subunit) (DDBb) (Damage-specific DNA-<br>binding protein 2) (UV-damaged DNA-<br>binding protein 2) (UV-DDB 2)                                                                                                               |
| Q92499 | DDX1                                | ATP-dependent RNA helicase DDX1 (EC<br>3.6.4.13) (DEAD box protein 1) (DEAD<br>box protein retinoblastoma) (DBP-RB)                                                                                                                                                  |
| Q92527 | ANKRD7                              | Ankyrin repeat domain-containing protein<br>7 (Testis-specific protein TSA806)                                                                                                                                                                                       |
| Q92540 | SMG7 C1orf16 EST1C KIAA0250         | Protein SMG7 (EST1-like protein C)<br>(SMG-7 homolog) (hSMG-7)                                                                                                                                                                                                       |
| Q92615 | LARP4B KIAA0217 LARP5               | La-related protein 4B (La ribonucleoprotein<br>domain family member 4B) (La<br>ribonucleoprotein domain family member<br>5) (La-related protein 5)                                                                                                                   |
| Q92620 | DHX38 DDX38 KIAA0224 PRP16          | Pre-mRNA-splicing factor ATP-dependent<br>RNA helicase PRP16 (EC 3.6.4.13) (ATP-<br>dependent RNA helicase DHX38) (DEAH<br>box protein 38)                                                                                                                           |
| Q92625 | ANKS1A ANKS1 KIAA0229 ODIN          | Ankyrin repeat and SAM domain-<br>containing protein 1A (Odin)                                                                                                                                                                                                       |
| Q92626 | PXDN KIAA0230 MG50 PRG2 VPO<br>VPO1 | Peroxidasin homolog (EC 1.11.1.7)<br>(Melanoma-associated antigen MG50)<br>(Vascular peroxidase 1) (p53-responsive<br>gene 2 protein)                                                                                                                                |
| Q92630 | DYRK2                               | Dual specificity tyrosine-phosphorylation-<br>regulated kinase 2 (EC 2.7.12.1)                                                                                                                                                                                       |
| Q92636 | NSMAF FAN                           | Protein FAN (Factor associated with<br>neutral sphingomyelinase activation)<br>(Factor associated with N-SMase<br>activation)                                                                                                                                        |
| Q92664 | GTF3A                               | Transcription factor IIIA (TFIIIA)                                                                                                                                                                                                                                   |
| Q92667 | AKAP1 AKAP149 PRKA1                 | A-kinase anchor protein 1, mitochondrial<br>(A-kinase anchor protein 149 kDa) (AKAP<br>149) (Dual specificity A-kinase-anchoring<br>protein 1) (D-AKAP-1) (Protein kinase A-<br>anchoring protein 1) (PRKA1) (Spermatid<br>A-kinase anchor protein 84) (S-AKAP84)    |
| Q92733 | PRCC TPRC                           | Proline-rich protein PRCC (Papillary renal<br>cell carcinoma translocation-associated<br>gene protein)                                                                                                                                                               |
| Q92772 | CDKL2                               | Cyclin-dependent kinase-like 2 (EC<br>2.7.11.22) (Protein kinase p56 KKIAMRE)<br>(Serine/threonine-protein kinase<br>KKIAMRE)                                                                                                                                        |
| Q92793 | CREBBP CBP                          | CREB-binding protein (EC 2.3.1.48)                                                                                                                                                                                                                                   |
| Q92828 | CORO2A IR10 WDR2                    | Coronin-2A (IR10) (WD repeat-containing<br>protein 2)                                                                                                                                                                                                                |

|        |                                  |                                                                                                                                                                                                                                                                                                                                                  |
|--------|----------------------------------|--------------------------------------------------------------------------------------------------------------------------------------------------------------------------------------------------------------------------------------------------------------------------------------------------------------------------------------------------|
| Q92833 | JARID2 JMJ                       | Protein Jumonji (Jumonji/ARID domain-containing protein 2)                                                                                                                                                                                                                                                                                       |
| Q92841 | DDX17                            | Probable ATP-dependent RNA helicase DDX17 (EC 3.6.4.13) (DEAD box protein 17) (DEAD box protein p72) (RNA-dependent helicase p72)                                                                                                                                                                                                                |
| Q92876 | KLK6 PRSS18 PRSS9                | Kallikrein-6 (EC 3.4.21.-) (Neurosin) (Protease M) (SP59) (Serine protease 18) (Serine protease 9) (Zyme)                                                                                                                                                                                                                                        |
| Q92879 | CELF1 BRUNOL2 CUGBP CUGBP1 NAB50 | CUGBP Elav-like family member 1 (CELF-1) (50 kDa nuclear polyadenylated RNA-binding protein) (Bruno-like protein 2) (CUG triplet repeat RNA-binding protein 1) (CUG-BP1) (CUG-BP- and ETR-3-like factor 1) (Deadenylation factor CUG-BP) (Embryo deadenylation element-binding protein homolog) (EDEN-BP homolog) (RNA-binding protein BRUNOL-2) |
| Q92887 | ABCC2 CMOAT CMOAT1 CMRP MRP2     | Canalicular multispecific organic anion transporter 1 (ATP-binding cassette sub-family C member 2) (Canalicular multidrug resistance protein) (Multidrug resistance-associated protein 2)                                                                                                                                                        |
| Q92900 | UPF1 KIAA0221 RENT1              | Regulator of nonsense transcripts 1 (EC 3.6.4.-) (ATP-dependent helicase RENT1) (Nonsense mRNA reducing factor 1) (NORF1) (Up-frameshift suppressor 1 homolog) (hUpf1)                                                                                                                                                                           |
| Q92901 | RPL3L                            | 60S ribosomal protein L3-like                                                                                                                                                                                                                                                                                                                    |
| Q92904 | DAZL DAZH DAZL1 DAZLA SPGYLA     | Deleted in azoospermia-like (DAZ homolog) (DAZ-like autosomal) (Deleted in azoospermia-like 1) (SPGY-like-autosomal)                                                                                                                                                                                                                             |
| Q92918 | MAP4K1 HPK1                      | Mitogen-activated protein kinase kinase kinase 1 (EC 2.7.11.1) (Hematopoietic progenitor kinase) (MAPK/ERK kinase kinase 1) (MEK kinase kinase 1) (MEKKK 1)                                                                                                                                                                                      |
| Q92945 | KHSRP FUBP2                      | Far upstream element-binding protein 2 (FUSE-binding protein 2) (KH type-splicing regulatory protein) (KSRP) (p75)                                                                                                                                                                                                                               |
| Q92966 | SNAPC3 SNAP50                    | snRNA-activating protein complex subunit 3 (SNAPc subunit 3) (Proximal sequence element-binding transcription factor subunit beta) (PSE-binding factor subunit beta) (PTF subunit beta) (Small nuclear RNA-activating complex polypeptide 3) (snRNA-activating protein complex 50 kDa subunit) (SNAPc 50 kDa subunit)                            |
| Q92979 | EMG1 C2F                         | Ribosomal RNA small subunit methyltransferase NEP1 (EC 2.1.1.-) (18S rRNA (pseudouridine(1248)-N1)-methyltransferase) (18S rRNA Psi1248 methyltransferase) (Nucleolar protein EMG1 homolog) (Protein C2f) (Ribosome biogenesis protein NEP1)                                                                                                     |
| Q92985 | IRF7                             | Interferon regulatory factor 7 (IRF-7)                                                                                                                                                                                                                                                                                                           |
| Q92989 | CLP1 HEAB                        | Polyribonucleotide 5'-hydroxyl-kinase Clp1                                                                                                                                                                                                                                                                                                       |

|        |                              |                                                                                                                                                                                                                     |
|--------|------------------------------|---------------------------------------------------------------------------------------------------------------------------------------------------------------------------------------------------------------------|
|        |                              | (EC 2.7.1.78) (Polyadenylation factor Clp1) (Polynucleotide kinase Clp1) (Pre-mRNA cleavage complex II protein Clp1)                                                                                                |
| Q92993 | KAT5 HTATIP TIP60            | Histone acetyltransferase KAT5 (EC 2.3.1.48) (60 kDa Tat-interactive protein) (Tip60) (Histone acetyltransferase HTATIP) (HIV-1 Tat interactive protein) (Lysine acetyltransferase 5) (cPLA(2)-interacting protein) |
| Q93033 | CD101 EWI101 IGSF2 V7        | Immunoglobulin superfamily member 2 (IgSF2) (Cell surface glycoprotein V7) (Glu-Trp-Ile EWI motif-containing protein 101) (EWI-101) (CD antigen CD101)                                                              |
| Q93062 | RBPMS HERMES                 | RNA-binding protein with multiple splicing (RBP-MS) (Heart and RRM expressed sequence) (Hermes)                                                                                                                     |
| Q969F1 | GTF3C6 C6orf51 CDA020 NPD020 | General transcription factor 3C polypeptide 6 (Transcription factor IIIC 35 kDa subunit) (TFIIIC 35 kDa subunit) (TFIIIC35) (Transcription factor IIIC subunit 6)                                                   |
| Q969H0 | FBXW7 FBW7 FBX30 SEL10       | F-box/WD repeat-containing protein 7 (Archipelago homolog) (hAgo) (F-box and WD-40 domain-containing protein 7) (F-box protein FBX30) (SEL-10) (hCdc4)                                                              |
| Q969H6 | POP5 AD-008 HSPC004 x0003    | Ribonuclease P/MRP protein subunit POP5 (hPop5) (EC 3.1.26.5)                                                                                                                                                       |
| Q969J2 | ZKSCAN4 ZNF307 ZNF427        | Zinc finger protein with KRAB and SCAN domains 4 (P373c6.1) (Zinc finger protein 307) (Zinc finger protein 427)                                                                                                     |
| Q969L4 | LSM10                        | U7 snRNA-associated Sm-like protein LSml0                                                                                                                                                                           |
| Q969Q0 | RPL36AL                      | 60S ribosomal protein L36a-like                                                                                                                                                                                     |
| Q969S9 | GFM2 EFG2 MSTP027            | Ribosome-releasing factor 2, mitochondrial (RRF2mt) (Elongation factor G 2, mitochondrial) (EF-G2mt) (mEF-G 2) (Elongation factor G2) (hEFG2)                                                                       |
| Q969V6 | MKL1 KIAA1438 MAL            | MKL/myocardin-like protein 1 (Megakaryoblastic leukemia 1 protein) (Megakaryocytic acute leukemia protein) (Myocardin-related transcription factor A) (MRTF-A)                                                      |
| Q969W8 | ZNF566                       | Zinc finger protein 566                                                                                                                                                                                             |
| Q969X6 | CIRH1A KIAA1988 UTP4         | Cirhin                                                                                                                                                                                                              |
| Q969Y2 | GTPBP3 MTGP1                 | tRNA modification GTPase GTPBP3, mitochondrial (GTP-binding protein 3) (Mitochondrial GTP-binding protein 1)                                                                                                        |
| Q96A35 | MRPL24                       | 39S ribosomal protein L24, mitochondrial (L24mt) (MRP-L24)                                                                                                                                                          |
| Q96A72 | MAGOH2 MAGOH2                | Protein mago nashi homolog 2                                                                                                                                                                                        |
| Q96AE4 | FUBP1                        | Far upstream element-binding protein 1 (FBP) (FUSE-binding protein 1) (DNA helicase V) (hDH V)                                                                                                                      |
| Q96AK3 | APOBEC3D                     | DNA dC->dU-editing enzyme APOBEC-3D (A3D) (EC 3.5.4.-)                                                                                                                                                              |
| Q96AP0 | ACD PIP1 PTOP TINT1 TPP1     | Adrenocortical dysplasia protein homolog (POT1 and TIN2-interacting protein)                                                                                                                                        |
| Q96AX9 | MIB2 SKD ZZANK1              | E3 ubiquitin-protein ligase MIB2 (EC                                                                                                                                                                                |

|        |                         |                                                                                                                                                                                                                                                     |
|--------|-------------------------|-----------------------------------------------------------------------------------------------------------------------------------------------------------------------------------------------------------------------------------------------------|
|        |                         | 6.3.2.-) (Mind bomb homolog 2) (Novel zinc finger protein) (Novelzin) (Putative NF-kappa-B-activating protein 002N) (Skeletrophin) (Zinc finger ZZ type with ankyrin repeat domain protein 1)                                                       |
| Q96AZ6 | ISG20 HEM45             | Interferon-stimulated gene 20 kDa protein (EC 3.1.13.1) (Estrogen-regulated transcript 45 protein) (Promyelocytic leukemia nuclear body-associated protein ISG20)                                                                                   |
| Q96B26 | EXOSC8 OIP2 RRP43       | Exosome complex component RRP43 (Exosome component 8) (Opa-interacting protein 2) (OIP-2) (Ribosomal RNA-processing protein 43) (p9)                                                                                                                |
| Q96B70 | LENG9                   | Leukocyte receptor cluster member 9                                                                                                                                                                                                                 |
| Q96BK5 | PINX1 LPTL LPTS         | PIN2/TERF1-interacting telomerase inhibitor 1 (Liver-related putative tumor suppressor) (Pin2-interacting protein X1) (Protein 67-11-3) (TRF1-interacting protein 1)                                                                                |
| Q96BP2 | CHCHD1 C10orf34 MRPS37  | Coiled-coil-helix-coiled-coil-helix domain-containing protein 1 (28S ribosomal protein S37, mitochondrial) (MRP-S37) (Nuclear protein C2360)                                                                                                        |
| Q96BP3 | PPWD1 KIAA0073          | Peptidylprolyl isomerase domain and WD repeat-containing protein 1 (EC 5.2.1.8) (Spliceosome-associated cyclophilin)                                                                                                                                |
| Q96BR1 | SGK3 CISK SGKL          | Serine/threonine-protein kinase Sgk3 (EC 2.7.11.1) (Cytokine-independent survival kinase) (Serum/glucocorticoid-regulated kinase 3) (Serum/glucocorticoid-regulated kinase-like)                                                                    |
| Q96BV0 | ZNF775                  | Zinc finger protein 775                                                                                                                                                                                                                             |
| Q96C10 | DHX58 D11LGP2E LGP2     | Probable ATP-dependent RNA helicase DHX58 (EC 3.6.4.13) (Probable ATP-dependent helicase LGP2) (Protein D11Lgp2 homolog) (RIG-I-like receptor 3) (RLR-3) (RIG-I-like receptor LGP2) (RLR)                                                           |
| Q96C45 | ULK4                    | Serine/threonine-protein kinase ULK4 (EC 2.7.11.1) (Unc-51-like kinase 4)                                                                                                                                                                           |
| Q96C86 | DCPS DCS1 HINT5 HSPC015 | m7GpppX diphosphatase (EC 3.6.1.59) (DCS-1) (Decapping scavenger enzyme) (Hint-related 7meGMP-directed hydrolase) (Histidine triad nucleotide-binding protein 5) (Histidine triad protein member 5) (HINT-5) (Scavenger mRNA-decapping enzyme DcpS) |
| Q96CM3 | RPUSD4                  | RNA pseudouridylate synthase domain-containing protein 4                                                                                                                                                                                            |
| Q96CS4 | ZNF689                  | Zinc finger protein 689                                                                                                                                                                                                                             |
| Q96CX3 | ZNF501 ZNF52            | Zinc finger protein 501 (Zinc finger protein 52)                                                                                                                                                                                                    |
| Q96D46 | NMD3 CGI-07             | 60S ribosomal export protein NMD3 (hNMD3)                                                                                                                                                                                                           |
| Q96D53 | ADCK4                   | AarF domain-containing protein kinase 4 (EC 2.7.11.-)                                                                                                                                                                                               |
| Q96DH6 | MSI2                    | RNA-binding protein Musashi homolog 2 (Musashi-2)                                                                                                                                                                                                   |



|        |                                   |                                                                                                                                                                                                                                                           |
|--------|-----------------------------------|-----------------------------------------------------------------------------------------------------------------------------------------------------------------------------------------------------------------------------------------------------------|
| Q96DI7 | SNRNP40 PRP8BP SFP38 WDR57        | U5 small nuclear ribonucleoprotein 40 kDa protein (U5 snRNP 40 kDa protein) (U5-40K) (38 kDa-splicing factor) (Prp8-binding protein) (hPRP8BP) (U5 snRNP-specific 40 kDa protein) (WD repeat-containing protein 57)                                       |
| Q96DP5 | MTFMT FMT FMT1                    | Methionyl-tRNA formyltransferase, mitochondrial (MtFMT) (EC 2.1.2.9)                                                                                                                                                                                      |
| Q96DU9 | PABPC5 PABP5                      | Polyadenylate-binding protein 5 (PABP-5) (Poly(A)-binding protein 5)                                                                                                                                                                                      |
| Q96E11 | MRRF                              | Ribosome-recycling factor, mitochondrial (RRF) (Ribosome-releasing factor, mitochondrial)                                                                                                                                                                 |
| Q96E39 | RBMXL1                            | RNA binding motif protein, X-linked-like-1 (Heterogeneous nuclear ribonucleoprotein G-like 1) [Cleaved into: RNA binding motif protein, X-linked-like-1, N-terminally processed]                                                                          |
| Q96EH5 | RPL39L RPL39L1                    | 60S ribosomal protein L39-like (60S ribosomal protein L39-2)                                                                                                                                                                                              |
| Q96EK9 | KTI12 SBBI81                      | Protein KTI12 homolog                                                                                                                                                                                                                                     |
| Q96EL2 | MRPS24 HSPC335                    | 28S ribosomal protein S24, mitochondrial (MRP-S24) (S24mt) (bMRP-47) (bMRP47)                                                                                                                                                                             |
| Q96EL3 | MRPL53                            | 39S ribosomal protein L53, mitochondrial (L53mt) (MRP-L53)                                                                                                                                                                                                |
| Q96EP5 | DAZAP1                            | DAZ-associated protein 1 (Deleted in azoospermia-associated protein 1)                                                                                                                                                                                    |
| Q96EY7 | PTCD3 MRPS39 TRG15                | Pentatricopeptide repeat domain-containing protein 3, mitochondrial (28S ribosomal protein S39, mitochondrial) (MRP-S39) (Transformation-related gene 15 protein) (TRG-15)                                                                                |
| Q96EY9 | ADAT3 TAD3                        | Probable inactive tRNA-specific adenosine deaminase-like protein 3 (tRNA-specific adenosine-34 deaminase subunit ADAT3)                                                                                                                                   |
| Q96F44 | TRIM11 RNF92                      | E3 ubiquitin-protein ligase TRIM11 (EC 6.3.2.-) (Protein BIA1) (RING finger protein 92) (Tripartite motif-containing protein 11)                                                                                                                          |
| Q96F86 | EDC3 LSM16 YJDC YJEFN2 PP844      | Enhancer of mRNA-decapping protein 3 (LSM16 homolog) (YjeF N-terminal domain-containing protein 2) (YjeF_N2) (hYjeF_N2) (YjeF domain-containing protein 1)                                                                                                |
| Q96FE5 | LINGO1 LERN1 LRRN6A UNQ201/PRO227 | Leucine-rich repeat and immunoglobulin-like domain-containing nogo receptor-interacting protein 1 (Leucine-rich repeat and immunoglobulin domain-containing protein 1) (Leucine-rich repeat neuronal protein 1) (Leucine-rich repeat neuronal protein 6A) |
| Q96FK6 | WDR89 C14orf150 MSTP050           | WD repeat-containing protein 89                                                                                                                                                                                                                           |
| Q96FN9 | DTD2 C14orf126                    | Probable D-tyrosyl-tRNA(Tyr) deacylase 2 (EC 3.1.-.-) (D-tyrosyl-tRNA deacylase 2)                                                                                                                                                                        |
| Q96FV9 | THOC1 HPR1                        | THO complex subunit 1 (Tho1) (Nuclear matrix protein p84) (p84N5) (hTREX84)                                                                                                                                                                               |
| Q96FX7 | TRMT61A C14orf172 TRM61           | tRNA (adenine(58)-N(1))-methyltransferase catalytic subunit TRMT61A (EC 2.1.1.220)                                                                                                                                                                        |

|        |                                            |                                                                                                                                                                                                                                                                                                    |
|--------|--------------------------------------------|----------------------------------------------------------------------------------------------------------------------------------------------------------------------------------------------------------------------------------------------------------------------------------------------------|
|        |                                            | (tRNA(m1A58)-methyltransferase subunit TRMT61A) (tRNA(m1A58)MTase subunit TRMT61A)                                                                                                                                                                                                                 |
| Q96G46 | DUS3L                                      | tRNA-dihydrouridine(47) synthase [NAD(P)(+)]-like (EC 1.3.1.-) (tRNA-dihydrouridine synthase 3-like)                                                                                                                                                                                               |
| Q96GC5 | MRPL48 CGI-118 HSPC290                     | 39S ribosomal protein L48, mitochondrial (L48mt) (MRP-L48)                                                                                                                                                                                                                                         |
| Q96GD4 | AURKB AIK2 AIM1 AIRK2 ARK2 STK1 STK12 STK5 | Aurora kinase B (EC 2.7.11.1) (Aurora 1) (Aurora- and IPL1-like midbody-associated protein 1) (AIM-1) (Aurora/IPL1-related kinase 2) (ARK-2) (Aurora-related kinase 2) (STK-1) (Serine/threonine-protein kinase 12) (Serine/threonine-protein kinase 5) (Serine/threonine-protein kinase aurora-B) |
| Q96GE5 | ZNF799 ZNF842                              | Zinc finger protein 799 (Zinc finger protein 842)                                                                                                                                                                                                                                                  |
| Q96GJ1 | TRMT2B CXorf34                             | tRNA (uracil(54)-C(5))-methyltransferase homolog (EC 2.1.1.35) (TRM2 homolog)                                                                                                                                                                                                                      |
| Q96GM8 | TOE1                                       | Target of EGR1 protein 1                                                                                                                                                                                                                                                                           |
| Q96GQ7 | DDX27 RHLP HSPC259 PP3241                  | Probable ATP-dependent RNA helicase DDX27 (EC 3.6.4.13) (DEAD box protein 27)                                                                                                                                                                                                                      |
| Q96GW9 | MARS2                                      | Methionine--tRNA ligase, mitochondrial (EC 6.1.1.10) (Methionyl-tRNA synthetase 2) (Mitochondrial methionyl-tRNA synthetase) (MtMetRS)                                                                                                                                                             |
| Q96GX5 | MASTL GW GWL THC2                          | Serine/threonine-protein kinase greatwall (GW) (GWL) (hGWL) (EC 2.7.11.1) (Microtubule-associated serine/threonine-protein kinase-like) (MAST-L)                                                                                                                                                   |
| Q96H35 | RBM18                                      | Probable RNA-binding protein 18 (RNA-binding motif protein 18)                                                                                                                                                                                                                                     |
| Q96H40 | ZNF486 KRBO2                               | Zinc finger protein 486 (KRAB domain only protein 2)                                                                                                                                                                                                                                               |
| Q96HQ0 | ZNF419 ZNF419A                             | Zinc finger protein 419                                                                                                                                                                                                                                                                            |
| Q96HR8 | NAF1                                       | H/ACA ribonucleoprotein complex non-core subunit NAF1 (hNAF1)                                                                                                                                                                                                                                      |
| Q96I24 | FUBP3 FBP3                                 | Far upstream element-binding protein 3 (FUSE-binding protein 3)                                                                                                                                                                                                                                    |
| Q96I25 | RBM17 SPF45                                | Splicing factor 45 (45 kDa-splicing factor) (RNA-binding motif protein 17)                                                                                                                                                                                                                         |
| Q96I34 | PPP1R16A MYPT3                             | Protein phosphatase 1 regulatory subunit 16A (Myosin phosphatase-targeting subunit 3)                                                                                                                                                                                                              |
| Q96I59 | NARS2                                      | Probable asparagine--tRNA ligase, mitochondrial (EC 6.1.1.22) (Asparaginyl-tRNA synthetase) (AsnRS)                                                                                                                                                                                                |
| Q96IC2 | 44M2.3                                     | Putative RNA exonuclease NEF-sp (EC 3.1.-.-)                                                                                                                                                                                                                                                       |
| Q96IR2 | ZNF845                                     | Zinc finger protein 845                                                                                                                                                                                                                                                                            |
| Q96J01 | THOC3                                      | THO complex subunit 3 (Tho3) (TEX1 homolog) (hTREX45)                                                                                                                                                                                                                                              |
| Q96J65 | ABCC12 MRP9                                | Multidrug resistance-associated protein 9 (ATP-binding cassette sub-family C member 12)                                                                                                                                                                                                            |
| Q96J66 | ABCC11 MRP8                                | ATP-binding cassette sub-family C member 11 (Multidrug resistance-                                                                                                                                                                                                                                 |

|        |                                                             |                                                                                                                                                                                                                                                           |
|--------|-------------------------------------------------------------|-----------------------------------------------------------------------------------------------------------------------------------------------------------------------------------------------------------------------------------------------------------|
|        |                                                             | associated protein 8)                                                                                                                                                                                                                                     |
| Q96J87 | CELF6 BRUNOL6                                               | CUGBP Elav-like family member 6 (CELF-6) (Bruno-like protein 6) (CUG-BP-and ETR-3-like factor 6) (RNA-binding protein BRUNOL-6)                                                                                                                           |
| Q96J92 | WNK4 PRKWNK4                                                | Serine/threonine-protein kinase WNK4 (EC 2.7.11.1) (Protein kinase lysine-deficient 4) (Protein kinase with no lysine 4)                                                                                                                                  |
| Q96J94 | PIWIL1 HIWI                                                 | Piwi-like protein 1                                                                                                                                                                                                                                       |
| Q96JA1 | LRIG1 LIG1                                                  | Leucine-rich repeats and immunoglobulin-like domains protein 1 (LIG-1)                                                                                                                                                                                    |
| Q96JB3 | HIC2 HRG22 KIAA1020 ZBTB30                                  | Hypermethylated in cancer 2 protein (Hic-2) (HIC1-related gene on chromosome 22 protein) (Hic-3) (Zinc finger and BTB domain-containing protein 30)                                                                                                       |
| Q96JC4 | ZNF479                                                      | Zinc finger protein 479 (Zinc finger protein Kr19) (HKr19)                                                                                                                                                                                                |
| Q96JF6 | ZNF594 KIAA1871                                             | Zinc finger protein 594 (Zinc finger protein HZF18)                                                                                                                                                                                                       |
| Q96JK2 | DCAF5 BCRG2 KIAA1824 WDR22                                  | DDB1- and CUL4-associated factor 5 (Breakpoint cluster region protein 2) (BCRP2) (WD repeat-containing protein 22)                                                                                                                                        |
| Q96JL9 | ZNF333 KIAA1806                                             | Zinc finger protein 333                                                                                                                                                                                                                                   |
| Q96JP0 | FEM1C KIAA1785                                              | Protein fem-1 homolog C (FEM1c) (FEM1-gamma)                                                                                                                                                                                                              |
| Q96JY0 | MAEL                                                        | Protein maelstrom homolog                                                                                                                                                                                                                                 |
| Q96K58 | ZNF668                                                      | Zinc finger protein 668                                                                                                                                                                                                                                   |
| Q96K83 | ZNF521 EHZF LIP3                                            | Zinc finger protein 521 (Early hematopoietic zinc finger protein) (LYST-interacting protein 3)                                                                                                                                                            |
| Q96KQ7 | EHMT2 BAT8 C6orf30 G9A KMT1C NG36                           | Histone-lysine N-methyltransferase EHMT2 (EC 2.1.1.-) (EC 2.1.1.43) (Euchromatic histone-lysine N-methyltransferase 2) (HLA-B-associated transcript 8) (Histone H3-K9 methyltransferase 3) (H3-K9-HMTase 3) (Lysine N-methyltransferase 1C) (Protein G9a) |
| Q96KR1 | ZFR                                                         | Zinc finger RNA-binding protein (hZFR) (M-phase phosphoprotein homolog)                                                                                                                                                                                   |
| Q96KV7 | WDR90 C16orf15 C16orf16 C16orf17 C16orf18 C16orf19 KIAA1924 | WD repeat-containing protein 90                                                                                                                                                                                                                           |
| Q96KX0 | LYZL4 LYC4                                                  | Lysozyme-like protein 4 (Lysozyme-4)                                                                                                                                                                                                                      |
| Q96L21 | RPL10L                                                      | 60S ribosomal protein L10-like                                                                                                                                                                                                                            |
| Q96L34 | MARK4 KIAA1860 MARKL1                                       | MAP/microtubule affinity-regulating kinase 4 (EC 2.7.11.1) (MAP/microtubule affinity-regulating kinase-like 1)                                                                                                                                            |
| Q96LT7 | C9orf72                                                     | Protein C9orf72                                                                                                                                                                                                                                           |
| Q96LT9 | RNPC3 KIAA1839 RBM40 RNP                                    | RNA-binding protein 40 (RNA-binding motif protein 40) (RNA-binding region-containing protein 3) (U11/U12 small nuclear ribonucleoprotein 65 kDa protein) (U11/U12 snRNP 65 kDa protein) (U11/U12-65K)                                                     |
| Q96LW1 | ZNF354B                                                     | Zinc finger protein 354B                                                                                                                                                                                                                                  |

|        |                          |                                                                                                                                                                                                |
|--------|--------------------------|------------------------------------------------------------------------------------------------------------------------------------------------------------------------------------------------|
| Q96LW2 | SGK494                   | Uncharacterized serine/threonine-protein kinase SgK494 (EC 2.7.11.1) (Sugen kinase 494)                                                                                                        |
| Q96M93 | ADAD1 TENR               | Adenosine deaminase domain-containing protein 1 (Testis nuclear RNA-binding protein)                                                                                                           |
| Q96MH2 | HEXIM2 L3                | Protein HEXIM2 (Hexamethylene bis-acetamide-inducible protein 2)                                                                                                                               |
| Q96MM3 | ZFP42 REX1 ZNF754        | Zinc finger protein 42 homolog (Zfp-42) (Reduced expression protein 1) (REX-1) (hREX-1) (Zinc finger protein 754)                                                                              |
| Q96MR6 | CFAP57 WDR65             | Cilia- and flagella-associated protein 57 (WD repeat-containing protein 65)                                                                                                                    |
| Q96MR9 | ZNF560                   | Zinc finger protein 560                                                                                                                                                                        |
| Q96MT7 | CFAP44 WDR52             | Cilia- and flagella-associated protein 44 (WD repeat-containing protein 52)                                                                                                                    |
| Q96MU6 | ZNF778                   | Zinc finger protein 778                                                                                                                                                                        |
| Q96MU7 | YTHDC1 KIAA1966 YT521    | YTH domain-containing protein 1 (Putative splicing factor YT521) (YT521-B)                                                                                                                     |
| Q96MX3 | ZNF48 ZNF553             | Zinc finger protein 48 (Zinc finger protein 553)                                                                                                                                               |
| Q96N22 | ZNF681                   | Zinc finger protein 681                                                                                                                                                                        |
| Q96N38 | ZNF714                   | Zinc finger protein 714                                                                                                                                                                        |
| Q96ND8 | ZNF583                   | Zinc finger protein 583 (Zinc finger protein L3-5)                                                                                                                                             |
| Q96NG5 | ZNF558                   | Zinc finger protein 558                                                                                                                                                                        |
| Q96NG8 | ZNF582                   | Zinc finger protein 582                                                                                                                                                                        |
| Q96NI6 | LRFN5 C14orf146 SALM5    | Leucine-rich repeat and fibronectin type-III domain-containing protein 5                                                                                                                       |
| Q96NI8 | ZNF570                   | Zinc finger protein 570                                                                                                                                                                        |
| Q96NJ3 | ZNF285 ZNF285A           | Zinc finger protein 285 (Zinc finger protein 285A)                                                                                                                                             |
| Q96NJ6 | ZFP3 ZNF752              | Zinc finger protein 3 homolog (Zfp-3) (Zinc finger protein 752)                                                                                                                                |
| Q96NL3 | ZNF599                   | Zinc finger protein 599                                                                                                                                                                        |
| Q96NS5 | ASB16                    | Ankyrin repeat and SOCS box protein 16 (ASB-16)                                                                                                                                                |
| Q96NW4 | ANKRD27 PP12899          | Ankyrin repeat domain-containing protein 27 (VPS9 domain-containing protein)                                                                                                                   |
| Q96NX5 | CAMK1G CLICK3 VWS1       | Calcium/calmodulin-dependent protein kinase type 1G (EC 2.7.11.17) (CaM kinase I gamma) (CaM kinase IG) (CaM-KI gamma) (CaMKI gamma) (CaMKIG) (CaMK-like CREB kinase III) (CLICK III)          |
| Q96P53 | WDFY2 WDF2 ZFYVE22       | WD repeat and FYVE domain-containing protein 2 (WD40- and FYVE domain-containing protein 2) (Zinc finger FYVE domain-containing protein 22)                                                    |
| Q96PF2 | TSSK2 DGSB SPOGA2 STK22B | Testis-specific serine/threonine-protein kinase 2 (TSK-2) (TSK2) (TSSK-2) (Testis-specific kinase 2) (EC 2.7.11.1) (DiGeorge syndrome protein G) (DGS-G) (Serine/threonine-protein kinase 22B) |
| Q96PK6 | RBM14 SIP                | RNA-binding protein 14 (Paraspeckle protein 2) (PSP2) (RNA-binding motif protein 14) (RRM-containing coactivator activator/modulator) (Synaptotagmin-                                          |

|        |                                                |                                                                                                                                                                                                                                                 |
|--------|------------------------------------------------|-------------------------------------------------------------------------------------------------------------------------------------------------------------------------------------------------------------------------------------------------|
|        |                                                | interacting protein) (SYT-interacting protein)                                                                                                                                                                                                  |
| Q96PM9 | ZNF385A HZF RZF ZNF385                         | Zinc finger protein 385A (Hematopoietic zinc finger protein) (Retinal zinc finger protein)                                                                                                                                                      |
| Q96PN8 | TSSK3 SPOGA3 STK22C                            | Testis-specific serine/threonine-protein kinase 3 (TSK-3) (TSSK-3) (Testis-specific kinase 3) (EC 2.7.11.1) (Serine/threonine-protein kinase 22C)                                                                                               |
| Q96PQ6 | ZNF317 KIAA1588                                | Zinc finger protein 317                                                                                                                                                                                                                         |
| Q96PU8 | QKI HKQ                                        | Protein quaking (Hqk) (HqkI)                                                                                                                                                                                                                    |
| Q96PV6 | LENG8 KIAA1932                                 | Leukocyte receptor cluster member 8                                                                                                                                                                                                             |
| Q96PX8 | SLITRK1 KIAA1910 LRRC12 UNQ233/PRO266          | SLIT and NTRK-like protein 1 (Leucine-rich repeat-containing protein 12)                                                                                                                                                                        |
| Q96PY6 | NEK1 KIAA1901                                  | Serine/threonine-protein kinase Nek1 (EC 2.7.11.1) (Never in mitosis A-related kinase 1) (NimA-related protein kinase 1) (Renal carcinoma antigen NY-REN-55)                                                                                    |
| Q96PZ0 | PUS7 KIAA1897                                  | Pseudouridylate synthase 7 homolog (EC 5.4.99.-)                                                                                                                                                                                                |
| Q96Q11 | TRNT1 CGI-47                                   | CCA tRNA nucleotidyltransferase 1, mitochondrial (EC 2.7.7.72) (Mitochondrial tRNA nucleotidyl transferase, CCA-adding) (mt CCA-adding enzyme) (mt tRNA CCA-diphosphorylase) (mt tRNA CCA-pyrophosphorylase) (mt tRNA adenylyltransferase)      |
| Q96Q27 | ASB2                                           | Ankyrin repeat and SOCS box protein 2 (ASB-2)                                                                                                                                                                                                   |
| Q96Q40 | CDK15 ALS2CR7 PFTK2                            | Cyclin-dependent kinase 15 (EC 2.7.11.22) (Amyotrophic lateral sclerosis 2 chromosomal region candidate gene 7 protein) (Cell division protein kinase 15) (Serine/threonine-protein kinase ALS2CR7) (Serine/threonine-protein kinase PFTAIRE-2) |
| Q96QH8 | SPACA5 LYZL5 SPACA5A UNQ6288/PRO20753; SPACA5B | Sperm acrosome-associated protein 5 (EC 3.2.1.17) (Lysozyme-like protein 5) (Sperm-specific lysozyme-like protein X) (SLLP-X)                                                                                                                   |
| Q96QS6 | PSKH2                                          | Serine/threonine-protein kinase H2 (EC 2.7.11.1) (Protein serine kinase H2) (PSK-H2)                                                                                                                                                            |
| Q96RE9 | ZNF300                                         | Zinc finger protein 300                                                                                                                                                                                                                         |
| Q96RP9 | GFM1 EFG EFG1 GFM                              | Elongation factor G, mitochondrial (EF-Gmt) (Elongation factor G 1, mitochondrial) (mEF-G 1) (Elongation factor G1) (hEFG1)                                                                                                                     |
| Q96RR4 | CAMKK2 CAMKKB KIAA0787                         | Calcium/calmodulin-dependent protein kinase kinase 2 (CaM-KK 2) (CaM-kinase kinase 2) (CaMKK 2) (EC 2.7.11.17) (Calcium/calmodulin-dependent protein kinase kinase beta) (CaM-KK beta) (CaM-kinase kinase beta) (CaMKK beta)                    |
| Q96RS0 | TGS1 HCA137 NCOA6IP PIMT                       | Trimethylguanosine synthase (EC 2.1.1.-) (CLL-associated antigen KW-2) (Cap-specific guanine-N2 methyltransferase) (Hepatocellular carcinoma-associated                                                                                         |

|        |                           |                                                                                                                                                                                                      |
|--------|---------------------------|------------------------------------------------------------------------------------------------------------------------------------------------------------------------------------------------------|
|        |                           | antigen 137) (Nuclear receptor coactivator 6-interacting protein) (PRIP-interacting protein with methyltransferase motif) (PIMT) (PIPMT)                                                             |
| Q96S15 | WDR24 C16orf21 JFP7       | WD repeat-containing protein 24                                                                                                                                                                      |
| Q96S38 | RPS6KC1 RPK118            | Ribosomal protein S6 kinase delta-1 (S6K-delta-1) (EC 2.7.11.1) (52 kDa ribosomal protein S6 kinase) (Ribosomal S6 kinase-like protein with two PSK domains 118 kDa protein) (SPHK1-binding protein) |
| Q96S94 | CCNL2 SB138               | Cyclin-L2 (Paneth cell-enhanced expression protein)                                                                                                                                                  |
| Q96SE7 | ZNF347 ZNF1111            | Zinc finger protein 347 (Zinc finger protein 1111)                                                                                                                                                   |
| Q96SI9 | STRBP SPNR                | Spermatid perinuclear RNA-binding protein                                                                                                                                                            |
| Q96SK3 | ZNF607                    | Zinc finger protein 607                                                                                                                                                                              |
| Q96SL8 | FIZ1 ZNF798               | Flt3-interacting zinc finger protein 1 (Zinc finger protein 798)                                                                                                                                     |
| Q96SZ4 | ZSCAN10 ZNF206            | Zinc finger and SCAN domain-containing protein 10 (Zinc finger protein 206)                                                                                                                          |
| Q96T37 | RBM15 OTT OTT1            | Putative RNA-binding protein 15 (One-twenty two protein 1) (RNA-binding motif protein 15)                                                                                                            |
| Q96T58 | SPEN KIAA0929 MINT SHARP  | Msx2-interacting protein (SMART/HDAC1-associated repressor protein) (SPEN homolog)                                                                                                                   |
| Q96T76 | MMS19 MMS19L              | MMS19 nucleotide excision repair protein homolog (hMMS19) (MET18 homolog) (MMS19-like protein)                                                                                                       |
| Q99459 | CDC5L KIAA0432 PCDC5RP    | Cell division cycle 5-like protein (Cdc5-like protein) (Pombe cdc5-related protein)                                                                                                                  |
| Q99467 | CD180 LY64 RP105          | CD180 antigen (Lymphocyte antigen 64) (Radioprotective 105 kDa protein) (CD antigen CD180)                                                                                                           |
| Q99547 | MPHOSPH6 MPP6             | M-phase phosphoprotein 6                                                                                                                                                                             |
| Q99549 | MPHOSPH8 MPP8             | M-phase phosphoprotein 8 (Two hybrid-associated protein 3 with RanBPM) (Twa3)                                                                                                                        |
| Q99558 | MAP3K14 NIK               | Mitogen-activated protein kinase kinase kinase 14 (EC 2.7.11.25) (NF-kappa-beta-inducing kinase) (HsNIK) (Serine/threonine-protein kinase NIK)                                                       |
| Q99575 | POP1 KIAA0061             | Ribonucleases P/MRP protein subunit POP1 (hPOP1) (EC 3.1.26.5)                                                                                                                                       |
| Q99613 | EIF3C EIF3S8              | Eukaryotic translation initiation factor 3 subunit C (eIF3c) (Eukaryotic translation initiation factor 3 subunit 8) (eIF3 p110)                                                                      |
| Q99633 | PRPF18 HPRP18             | Pre-mRNA-splicing factor 18 (PRP18 homolog) (hPRP18)                                                                                                                                                 |
| Q99640 | PKMYT1 MYT1               | Membrane-associated tyrosine- and threonine-specific cdc2-inhibitory kinase (EC 2.7.11.1) (Myt1 kinase)                                                                                              |
| Q99676 | ZNF184                    | Zinc finger protein 184                                                                                                                                                                              |
| Q99683 | MAP3K5 ASK1 MAPKKK5 MEKK5 | Mitogen-activated protein kinase kinase kinase 5 (EC 2.7.11.25) (Apoptosis signal-regulating kinase 1) (ASK-1) (MAPK/ERK kinase kinase 5) (MEK kinase 5) (MEKK 5)                                    |

|        |                                     |                                                                                                                                                                                        |
|--------|-------------------------------------|----------------------------------------------------------------------------------------------------------------------------------------------------------------------------------------|
| Q99684 | GFI1 ZNF163                         | Zinc finger protein Gfi-1 (Growth factor independent protein 1) (Zinc finger protein 163)                                                                                              |
| Q99698 | LYST CHS CHS1                       | Lysosomal-trafficking regulator (Beige homolog)                                                                                                                                        |
| Q99729 | HNRNPAB ABBP1 HNRPAB                | Heterogeneous nuclear ribonucleoprotein A/B (hnRNP A/B) (APOBEC1-binding protein 1) (ABBP-1)                                                                                           |
| Q99758 | ABCA3 ABC3                          | ATP-binding cassette sub-family A member 3 (ABC-C transporter) (ATP-binding cassette transporter 3) (ATP-binding cassette 3)                                                           |
| Q99759 | MAP3K3 MAPKKK3 MEKK3                | Mitogen-activated protein kinase kinase kinase 3 (EC 2.7.11.25) (MAPK/ERK kinase kinase 3) (MEK kinase 3) (MEKK 3)                                                                     |
| Q99798 | ACO2                                | Aconitate hydratase, mitochondrial (Aconitase) (EC 4.2.1.3) (Citrate hydro-lyase)                                                                                                      |
| Q99848 | EBNA1BP2 EBP2                       | Probable rRNA-processing protein EBP2 (EBNA1-binding protein 2) (Nucleolar protein p40)                                                                                                |
| Q99895 | CTRC CLCR                           | Chymotrypsin-C (EC 3.4.21.2) (Caldecrin)                                                                                                                                               |
| Q99973 | TEP1 TLP1 TP1                       | Telomerase protein component 1 (Telomerase-associated protein 1) (Telomerase protein 1) (p240) (p80 telomerase homolog)                                                                |
| Q99983 | OMD SLRR2C UNQ190/PRO216            | Osteomodulin (Keratan sulfate proteoglycan osteomodulin) (KSPG osteomodulin) (Osteoadherin) (OSAD)                                                                                     |
| Q9BQ04 | RBM4B RBM30                         | RNA-binding protein 4B (RNA-binding motif protein 30) (RNA-binding motif protein 4B) (RNA-binding protein 30)                                                                          |
| Q9BQ39 | DDX50                               | ATP-dependent RNA helicase DDX50 (EC 3.6.4.13) (DEAD box protein 50) (Gu-beta) (Nucleolar protein Gu2)                                                                                 |
| Q9BQ48 | MRPL34                              | 39S ribosomal protein L34, mitochondrial (L34mt) (MRP-L34)                                                                                                                             |
| Q9BQ52 | ELAC2 HPC2                          | Zinc phosphodiesterase ELAC protein 2 (EC 3.1.26.11) (ElaC homolog protein 2) (Heredity prostate cancer protein 2) (Ribonuclease Z 2) (RNase Z 2) (tRNA 3 endonuclease 2) (tRNase Z 2) |
| Q9BQ67 | GRWD1 GRWD KIAA1942 WDR28           | Glutamate-rich WD repeat-containing protein 1                                                                                                                                          |
| Q9BQ87 | TBL1Y TBL1                          | F-box-like/WD repeat-containing protein TBL1Y (Transducin beta-like protein 1Y) (Transducin-beta-like protein 1, Y-linked)                                                             |
| Q9BQA1 | WDR77 MEP50 WD45 HKMT1069 Nbla10071 | Methylosome protein 50 (MEP-50) (Androgen receptor cofactor p44) (WD repeat-containing protein 77) (p44/Mep50)                                                                         |
| Q9BQC6 | MRPL57 MRP63                        | Ribosomal protein 63, mitochondrial (hMRP63) (Mitochondrial ribosomal protein 63) (Mitochondrial ribosomal protein L57)                                                                |
| Q9BQG0 | MYBBP1A P160                        | Myb-binding protein 1A                                                                                                                                                                 |
| Q9BQI3 | EIF2AK1 HRI KIAA1369 PRO1362        | Eukaryotic translation initiation factor 2-alpha kinase 1 (EC 2.7.11.1) (Heme-controlled repressor) (HCR) (Heme-                                                                       |

|        |                                     |                                                                                                                                                                                                           |
|--------|-------------------------------------|-----------------------------------------------------------------------------------------------------------------------------------------------------------------------------------------------------------|
|        |                                     | regulated eukaryotic initiation factor eIF-2-alpha kinase) (Heme-regulated inhibitor) (Hemin-sensitive initiation factor 2-alpha kinase)                                                                  |
| Q9BQR3 | PRSS27 MPN UNQ1884/PRO4327          | Serine protease 27 (EC 3.4.21.-) (Marapsin) (Pancreasin)                                                                                                                                                  |
| Q9BR61 | ACBD6                               | Acyl-CoA-binding domain-containing protein 6                                                                                                                                                              |
| Q9BR76 | CORO1B                              | Coronin-1B (Coronin-2)                                                                                                                                                                                    |
| Q9BR84 | ZNF559                              | Zinc finger protein 559                                                                                                                                                                                   |
| Q9BRA0 | NAA38 LSMD1 MAK31 PFAAP2            | N-alpha-acetyltransferase 38, NatC auxiliary subunit (LSM domain-containing protein 1) (Phosphonoformate immuno-associated protein 2)                                                                     |
| Q9BRD0 | BUD13                               | BUD13 homolog                                                                                                                                                                                             |
| Q9BRH9 | ZNF251                              | Zinc finger protein 251                                                                                                                                                                                   |
| Q9BRL6 | SRSF8 SFRS2B SRP46                  | Serine/arginine-rich splicing factor 8 (Pre-mRNA-splicing factor SRP46) (Splicing factor SRp46) (Splicing factor, arginine/serine-rich 2B)                                                                |
| Q9BRP4 | PAAF1 WDR71                         | Proteasomal ATPase-associated factor 1 (Protein G-16) (WD repeat-containing protein 71)                                                                                                                   |
| Q9BRP7 | FDXACB1                             | Ferredoxin-fold anticodon-binding domain-containing protein 1 (FDX-ACDB domain-containing protein 1)                                                                                                      |
| Q9BRR0 | ZKSCAN3 ZFP47 ZNF306 ZNF309 ZSCAN13 | Zinc finger protein with KRAB and SCAN domains 3 (Zinc finger and SCAN domain-containing protein 13) (Zinc finger protein 306) (Zinc finger protein 309) (Zinc finger protein 47 homolog) (Zf47) (Zfp-47) |
| Q9BRS2 | RIOK1                               | Serine/threonine-protein kinase RIO1 (EC 2.7.11.1) (RIO kinase 1)                                                                                                                                         |
| Q9BRS8 | LARP6                               | La-related protein 6 (Acheron) (Achn) (La ribonucleoprotein domain family member 6)                                                                                                                       |
| Q9BRT6 | LLPH C12orf31                       | Protein LLP homolog (Protein LAPS18-like)                                                                                                                                                                 |
| Q9BRU9 | UTP23 C8orf53                       | rRNA-processing protein UTP23 homolog                                                                                                                                                                     |
| Q9BRX2 | PELO CGI-17                         | Protein pelota homolog (EC 3.1.-.-)                                                                                                                                                                       |
| Q9BRX9 | WDR83 MORG1                         | WD repeat domain-containing protein 83 (Mitogen-activated protein kinase organizer 1) (MAPK organizer 1)                                                                                                  |
| Q9BS34 | ZNF670                              | Zinc finger protein 670                                                                                                                                                                                   |
| Q9BSC4 | NOL10                               | Nucleolar protein 10                                                                                                                                                                                      |
| Q9BSD7 | NTPCR C1orf57                       | Cancer-related nucleoside-triphosphatase (NTPase) (EC 3.6.1.15) (Nucleoside triphosphate phosphohydrolase)                                                                                                |
| Q9BSG1 | ZNF2 ZNF661                         | Zinc finger protein 2 (Zinc finger protein 2.2) (Zinc finger protein 661)                                                                                                                                 |
| Q9BSK4 | FEM1A EPRAP                         | Protein fem-1 homolog A (FEM1a) (FEM1-alpha) (Prostaglandin E receptor 4-associated protein)                                                                                                              |
| Q9BSV6 | TSEN34 LENG5 SEN34                  | tRNA-splicing endonuclease subunit Sen34 (EC 4.6.1.16) (Leukocyte receptor cluster member 5) (tRNA-intron endonuclease Sen34) (HsSen34)                                                                   |



|        |                              |                                                                                                                                                                                                                                                  |
|--------|------------------------------|--------------------------------------------------------------------------------------------------------------------------------------------------------------------------------------------------------------------------------------------------|
| Q9BTD8 | RBM42                        | RNA-binding protein 42 (RNA-binding motif protein 42)                                                                                                                                                                                            |
| Q9BTF0 | THUMPD2 C2orf8               | THUMP domain-containing protein 2                                                                                                                                                                                                                |
| Q9BTL3 | FAM103A1 C15orf18            | RNMT-activating mini protein (RAM) (Protein FAM103A1)                                                                                                                                                                                            |
| Q9BTN0 | LRFN3 SALM4 UNQ5865/PRO34192 | Leucine-rich repeat and fibronectin type-III domain-containing protein 3 (Synaptic adhesion-like molecule 4)                                                                                                                                     |
| Q9BUB4 | ADAT1                        | tRNA-specific adenosine deaminase 1 (hADAT1) (EC 3.5.4.34) (tRNA-specific adenosine-37 deaminase)                                                                                                                                                |
| Q9BUI4 | POLR3C                       | DNA-directed RNA polymerase III subunit RPC3 (RNA polymerase III subunit C3) (DNA-directed RNA polymerase III subunit C) (RNA polymerase III 62 kDa subunit) (RPC62)                                                                             |
| Q9BUQ8 | DDX23                        | Probable ATP-dependent RNA helicase DDX23 (EC 3.6.4.13) (100 kDa U5 snRNP-specific protein) (DEAD box protein 23) (PRP28 homolog) (U5-100kD)                                                                                                     |
| Q9BUR4 | WRAP53 TCAB1 WDR79           | Telomerase Cajal body protein 1 (WD repeat-containing protein 79) (WD repeat-containing protein WRAP53) (WD40 repeat-containing protein antisense to TP53 gene)                                                                                  |
| Q9BUY5 | ZNF426                       | Zinc finger protein 426                                                                                                                                                                                                                          |
| Q9BV20 | MRI1 MRDI UNQ6390/PRO21135   | Methylthioribose-1-phosphate isomerase (M1Pi) (MTR-1-P isomerase) (EC 5.3.1.23) (Mediator of RhoA-dependent invasion) (S-methyl-5-thioribose-1-phosphate isomerase) (Translation initiation factor eIF-2B subunit alpha/beta/delta-like protein) |
| Q9BV38 | WDR18                        | WD repeat-containing protein 18                                                                                                                                                                                                                  |
| Q9BV44 | THUMPD3                      | THUMP domain-containing protein 3                                                                                                                                                                                                                |
| Q9BV68 | RNF126                       | E3 ubiquitin-protein ligase RNF126 (EC 6.3.2.-) (RING finger protein 126)                                                                                                                                                                        |
| Q9BVA0 | KATNB1                       | Katanin p80 WD40 repeat-containing subunit B1 (Katanin p80 subunit B1) (p80 katanin)                                                                                                                                                             |
| Q9BVC4 | MLST8 GBL LST8               | Target of rapamycin complex subunit LST8 (TORC subunit LST8) (G protein beta subunit-like) (Gable) (Protein GbetaL) (Mammalian lethal with SEC13 protein 8) (mLST8)                                                                              |
| Q9BVC5 | C2orf49                      | Ashwin                                                                                                                                                                                                                                           |
| Q9BVJ6 | UTP14A SDCCAG16              | U3 small nucleolar RNA-associated protein 14 homolog A (Antigen NY-CO-16) (Serologically defined colon cancer antigen 16)                                                                                                                        |
| Q9BVP2 | GNL3 E2IG3 NS                | Guanine nucleotide-binding protein-like 3 (E2-induced gene 3 protein) (Novel nucleolar protein 47) (NNP47) (Nucleolar GTP-binding protein 3) (Nucleostemin)                                                                                      |
| Q9BVS4 | RIOK2                        | Serine/threonine-protein kinase RIO2 (EC 2.7.11.1) (RIO kinase 2)                                                                                                                                                                                |
| Q9BVS5 | TRMT61B                      | tRNA (adenine(58)-N(1))-methyltransferase, mitochondrial (EC                                                                                                                                                                                     |

|        |                                                 |                                                                                                                                                                                                                                                                                                 |
|--------|-------------------------------------------------|-------------------------------------------------------------------------------------------------------------------------------------------------------------------------------------------------------------------------------------------------------------------------------------------------|
|        |                                                 | 2.1.1.220)                                                                                                                                                                                                                                                                                      |
| Q9BW92 | TARS2 TARSL1                                    | Threonine--tRNA ligase, mitochondrial (EC 6.1.1.3) (Threonyl-tRNA synthetase) (ThrRS) (Threonyl-tRNA synthetase-like 1)                                                                                                                                                                         |
| Q9BWF3 | RBM4 RBM4A                                      | RNA-binding protein 4 (Lark homolog) (hLark) (RNA-binding motif protein 4) (RNA-binding motif protein 4a)                                                                                                                                                                                       |
| Q9BWG6 | SCNM1                                           | Sodium channel modifier 1                                                                                                                                                                                                                                                                       |
| Q9BWH6 | RPAP1 KIAA1403                                  | RNA polymerase II-associated protein 1                                                                                                                                                                                                                                                          |
| Q9BWJ5 | SF3B5 SF3B10                                    | Splicing factor 3B subunit 5 (SF3b5) (Pre-mRNA-splicing factor SF3b 10 kDa subunit)                                                                                                                                                                                                             |
| Q9BWM5 | ZNF416                                          | Zinc finger protein 416                                                                                                                                                                                                                                                                         |
| Q9BWT3 | PAPOLG PAP2 PAPG                                | Poly(A) polymerase gamma (PAP-gamma) (EC 2.7.7.19) (Neo-poly(A) polymerase) (Neo-PAP) (Polynucleotide adenylyltransferase gamma) (SRP RNA 3'-adenylating enzyme)                                                                                                                                |
| Q9BWU1 | CDK19 CDC2L6 CDK11 KIAA1028                     | Cyclin-dependent kinase 19 (EC 2.7.11.22) (CDC2-related protein kinase 6) (Cell division cycle 2-like protein kinase 6) (Cell division protein kinase 19) (Cyclin-dependent kinase 11) (Death-preventing kinase)                                                                                |
| Q9BX10 | GTPBP2                                          | GTP-binding protein 2                                                                                                                                                                                                                                                                           |
| Q9BX46 | RBM24 RNPC6                                     | RNA-binding protein 24 (RNA-binding motif protein 24) (RNA-binding region-containing protein 6)                                                                                                                                                                                                 |
| Q9BX68 | HINT2                                           | Histidine triad nucleotide-binding protein 2, mitochondrial (HINT-2) (EC 3.-.-.-) (HINT-3) (HIT-17kDa) (PKCI-1-related HIT protein)                                                                                                                                                             |
| Q9BX82 | ZNF471 ERP1 KIAA1396                            | Zinc finger protein 471 (EZFIT-related protein 1)                                                                                                                                                                                                                                               |
| Q9BXA7 | TSSK1B SPOGA1 SPOGA4 STK22A STK22D TSSK1 FKSG81 | Testis-specific serine/threonine-protein kinase 1 (TSK-1) (TSK1) (TSSK-1) (Testis-specific kinase 1) (EC 2.7.11.1) (Serine/threonine-protein kinase 22A)                                                                                                                                        |
| Q9BXA9 | SALL3 ZNF796                                    | Sal-like protein 3 (Zinc finger protein 796) (Zinc finger protein SALL3) (hSALL3)                                                                                                                                                                                                               |
| Q9BXB1 | LGR4 GPR48                                      | Leucine-rich repeat-containing G-protein coupled receptor 4 (G-protein coupled receptor 48)                                                                                                                                                                                                     |
| Q9BXN1 | ASPN PLAP1 SLRR1C UNQ215/PRO241                 | Asporin (Periodontal ligament-associated protein 1) (PLAP-1)                                                                                                                                                                                                                                    |
| Q9BXR0 | QTRT1 TGT TGUT                                  | Queuine tRNA-ribosyltransferase (EC 2.4.2.29) (Guanine insertion enzyme) (tRNA-guanine transglycosylase)                                                                                                                                                                                        |
| Q9BXR3 | ERVK-6 ERVK6                                    | Endogenous retrovirus group K member 6 Pol protein (HERV-K(C7) Pol protein) (HERV-K(HML-2.HOM) Pol protein) (HERV-K108 Pol protein) (HERV-K_7p22.1 provirus ancestral Pol protein) [Includes: Reverse transcriptase (RT) (EC 2.7.7.49); Ribonuclease H (RNase H) (EC 3.1.26.4); Integrase (IN)] |
| Q9BXR5 | TLR10 UNQ315/PRO358                             | Toll-like receptor 10 (CD antigen CD290)                                                                                                                                                                                                                                                        |

|        |                                    |                                                                                                                                                                                                                                                                                                                                                                                   |
|--------|------------------------------------|-----------------------------------------------------------------------------------------------------------------------------------------------------------------------------------------------------------------------------------------------------------------------------------------------------------------------------------------------------------------------------------|
| Q9BXS6 | NUSAP1 ANKT BM-037 PRO0310         | Nucleolar and spindle-associated protein 1 (NuSAP)                                                                                                                                                                                                                                                                                                                                |
| Q9BXT4 | TDRD1                              | Tudor domain-containing protein 1 (Cancer/testis antigen 41.1) (CT41.1)                                                                                                                                                                                                                                                                                                           |
| Q9BXT6 | MOV10L1                            | Putative helicase Mov10l1 (EC 3.6.4.13) (Moloney leukemia virus 10-like protein 1) (MOV10-like protein 1)                                                                                                                                                                                                                                                                         |
| Q9BXX2 | ANKRD30B                           | Ankyrin repeat domain-containing protein 30B (Serologically defined breast cancer antigen NY-BR-1.1)                                                                                                                                                                                                                                                                              |
| Q9BY66 | KDM5D HY HYA JARID1D KIAA0234 SMCY | Lysine-specific demethylase 5D (EC 1.14.11.-) (Histocompatibility Y antigen) (H-Y) (Histone demethylase JARID1D) (Jumonji/ARID domain-containing protein 1D) (Protein SmcY)                                                                                                                                                                                                       |
| Q9BYB4 | GNB1L GY2 KIAA1645 WDR14 FKSG1     | Guanine nucleotide-binding protein subunit beta-like protein 1 (G protein subunit beta-like protein 1) (DGCRK3) (WD repeat-containing protein 14) (WD40 repeat-containing protein deleted in VCFS) (WDVCF)                                                                                                                                                                        |
| Q9BYC9 | MRPL20                             | 39S ribosomal protein L20, mitochondrial (L20mt) (MRP-L20)                                                                                                                                                                                                                                                                                                                        |
| Q9BYD1 | MRPL13                             | 39S ribosomal protein L13, mitochondrial (L13mt) (MRP-L13)                                                                                                                                                                                                                                                                                                                        |
| Q9BYD2 | MRPL9                              | 39S ribosomal protein L9, mitochondrial (L9mt) (MRP-L9)                                                                                                                                                                                                                                                                                                                           |
| Q9BYD3 | MRPL4 CDABP0091 CGI-28             | 39S ribosomal protein L4, mitochondrial (L4mt) (MRP-L4)                                                                                                                                                                                                                                                                                                                           |
| Q9BYD6 | MRPL1 BM-022                       | 39S ribosomal protein L1, mitochondrial (L1mt) (MRP-L1)                                                                                                                                                                                                                                                                                                                           |
| Q9BYE2 | TMPRSS13 MSP TMPRSS11              | Transmembrane protease serine 13 (EC 3.4.21.-) (Membrane-type mosaic serine protease) (Mosaic serine protease)                                                                                                                                                                                                                                                                    |
| Q9BYG3 | NIFK MKI67IP NOPP34                | MKI67 FHA domain-interacting nucleolar phosphoprotein (Nucleolar phosphoprotein Nopp34) (Nucleolar protein interacting with the FHA domain of pKI-67) (hNIFK)                                                                                                                                                                                                                     |
| Q9BYJ9 | YTHDF1 C20orf21                    | YTH domain-containing family protein 1 (Dermatomyositis associated with cancer putative autoantigen 1) (DACA-1)                                                                                                                                                                                                                                                                   |
| Q9BYK8 | HELZ2 KIAA1769 PRIC285             | Helicase with zinc finger domain 2 (ATP-dependent helicase PRIC285) (Helicase with zinc finger 2, transcriptional coactivator) (PPAR-alpha-interacting complex protein 285) (PPAR-gamma DNA-binding domain-interacting protein 1) (PDIP1) (PPAR-gamma DBD-interacting protein 1) (Peroxisomal proliferator-activated receptor A-interacting complex 285 kDa protein) (EC 3.6.4.-) |
| Q9BYN8 | MRPS26 C20orf193 RPMS13            | 28S ribosomal protein S26, mitochondrial (MRP-S26) (S26mt) (28S ribosomal protein S13, mitochondrial) (MRP-S13) (S13mt)                                                                                                                                                                                                                                                           |
| Q9BYP7 | WNK3 KIAA1566 PRKWNK3              | Serine/threonine-protein kinase WNK3 (EC 2.7.11.1) (Protein kinase lysine-deficient 3) (Protein kinase with no lysine 3)                                                                                                                                                                                                                                                          |
| Q9BYT3 | STK33                              | Serine/threonine-protein kinase 33 (EC                                                                                                                                                                                                                                                                                                                                            |

|        |                                                |                                                                                                                                                                                                                                                                                                                                                                                                                            |
|--------|------------------------------------------------|----------------------------------------------------------------------------------------------------------------------------------------------------------------------------------------------------------------------------------------------------------------------------------------------------------------------------------------------------------------------------------------------------------------------------|
|        |                                                | 2.7.11.1)                                                                                                                                                                                                                                                                                                                                                                                                                  |
| Q9BYW2 | SETD2 HIF1 HYPB KIAA1732<br>KMT3A SET2 HSPC069 | Histone-lysine N-methyltransferase SETD2 (EC 2.1.1.43) (HIF-1) (Huntingtin yeast partner B) (Huntingtin-interacting protein 1) (HIP-1) (Huntingtin-interacting protein B) (Lysine N-methyltransferase 3A) (SET domain-containing protein 2) (hSET2) (p231HBP)                                                                                                                                                              |
| Q9BYX4 | IFIH1 MDA5 RH116                               | Interferon-induced helicase C domain-containing protein 1 (EC 3.6.4.13) (Clinically amyopathic dermatomyositis autoantigen 140 kDa) (CADM-140 autoantigen) (Helicase with 2 CARD domains) (Helicard) (Interferon-induced with helicase C domain protein 1) (Melanoma differentiation-associated protein 5) (MDA-5) (Murabutide down-regulated protein) (RIG-I-like receptor 2) (RLR-2) (RNA helicase-DEAD box protein 116) |
| Q9BZB8 | CPEB1 CPEB                                     | Cytoplasmic polyadenylation element-binding protein 1 (CPE-BP1) (CPE-binding protein 1) (h-CPEB) (hCPEB-1)                                                                                                                                                                                                                                                                                                                 |
| Q9BZC1 | CELF4 BRUNOL4                                  | CUGBP Elav-like family member 4 (CELF-4) (Bruno-like protein 4) (CUG-BP-and ETR-3-like factor 4) (RNA-binding protein BRUNOL-4)                                                                                                                                                                                                                                                                                            |
| Q9BZC7 | ABCA2 ABC2 KIAA1062                            | ATP-binding cassette sub-family A member 2 (ATP-binding cassette transporter 2) (ATP-binding cassette 2)                                                                                                                                                                                                                                                                                                                   |
| Q9BZE1 | MRPL37 MRPL2 RPML2 HSPC235                     | 39S ribosomal protein L37, mitochondrial (L37mt) (MRP-L37) (39S ribosomal protein L2, mitochondrial) (L2mt) (MRP-L2)                                                                                                                                                                                                                                                                                                       |
| Q9BZE2 | PUS3 FKSG32                                    | tRNA pseudouridine(38/39) synthase (EC 5.4.99.45) (tRNA pseudouridine synthase 3) (tRNA pseudouridylate synthase 3) (tRNA-uridine isomerase 3)                                                                                                                                                                                                                                                                             |
| Q9BZE4 | GTPBP4 CRFG NOG1                               | Nucleolar GTP-binding protein 1 (Chronic renal failure gene protein) (GTP-binding protein NGB)                                                                                                                                                                                                                                                                                                                             |
| Q9BZF9 | UACA KIAA1561                                  | Uveal autoantigen with coiled-coil domains and ankyrin repeats                                                                                                                                                                                                                                                                                                                                                             |
| Q9BZI7 | UPF3B RENT3B UPF3X                             | Regulator of nonsense transcripts 3B (Nonsense mRNA reducing factor 3B) (Up-frameshift suppressor 3 homolog B) (hUpf3B) (Up-frameshift suppressor 3 homolog on chromosome X) (hUpf3p-X)                                                                                                                                                                                                                                    |
| Q9BZJ0 | CRNKL1 CRN CGI-201 MSTP021                     | Crooked neck-like protein 1 (Crooked neck homolog) (hCrn)                                                                                                                                                                                                                                                                                                                                                                  |
| Q9BZJ3 | TPSD1                                          | Tryptase delta (EC 3.4.21.59) (Delta-tryptase) (HmMCP-3-like tryptase III) (Mast cell mMCP-7-like) (Tryptase-3)                                                                                                                                                                                                                                                                                                            |
| Q9BZK7 | TBL1XR1 IRA1 TBLR1                             | F-box-like/WD repeat-containing protein TBL1XR1 (Nuclear receptor corepressor/HDAC3 complex subunit TBLR1) (TBL1-related protein 1) (Transducin beta-like 1X-related protein 1)                                                                                                                                                                                                                                            |
| Q9BZL4 | PPP1R12C LENG3 MBS85                           | Protein phosphatase 1 regulatory subunit                                                                                                                                                                                                                                                                                                                                                                                   |

|        |                                           |                                                                                                                                                                                                     |
|--------|-------------------------------------------|-----------------------------------------------------------------------------------------------------------------------------------------------------------------------------------------------------|
|        |                                           | 12C (Protein phosphatase 1 myosin-binding subunit of 85 kDa) (Protein phosphatase 1 myosin-binding subunit p85)                                                                                     |
| Q9BZL6 | PRKD2 PKD2 HSPC187                        | Serine/threonine-protein kinase D2 (EC 2.7.11.13) (nPKC-D2)                                                                                                                                         |
| Q9BZR6 | RTN4R NOGOR UNQ330/PRO526                 | Reticulon-4 receptor (Nogo receptor) (NgR) (Nogo-66 receptor)                                                                                                                                       |
| Q9C098 | DCLK3 DCAMKL3 DCDC3C KIAA1765             | Serine/threonine-protein kinase DCLK3 (EC 2.7.11.1) (Doublecortin domain-containing protein 3C) (Doublecortin-like and CAM kinase-like 3) (Doublecortin-like kinase 3)                              |
| Q9C0B1 | FTO KIAA1752                              | Alpha-ketoglutarate-dependent dioxygenase FTO (EC 1.14.11.-) (Fat mass and obesity-associated protein)                                                                                              |
| Q9C0D5 | TANC1 KIAA1728                            | Protein TANC1 (Tetratricopeptide repeat, ankyrin repeat and coiled-coil domain-containing protein 1)                                                                                                |
| Q9C0F3 | ZNF436 KIAA1710                           | Zinc finger protein 436                                                                                                                                                                             |
| Q9C0J8 | WDR33 WDC146                              | pre-mRNA 3' end processing protein WDR33 (WD repeat-containing protein 33) (WD repeat-containing protein WDC146)                                                                                    |
| Q9GZL7 | WDR12                                     | Ribosome biogenesis protein WDR12 (WD repeat-containing protein 12)                                                                                                                                 |
| Q9GZM3 | POLR2J2                                   | DNA-directed RNA polymerase II subunit RPB11-b1 (RNA polymerase II subunit B11-b1) (RPB11b1) (DNA-directed RNA polymerase II subunit J2)                                                            |
| Q9GZN4 | PRSS22 BSSP4 PRSS26 SP001LA UNQ302/PRO343 | Brain-specific serine protease 4 (BSSP-4) (EC 3.4.21.-) (Serine protease 22) (Serine protease 26) (Trypsin epsilon)                                                                                 |
| Q9GZR2 | REXO4 PMC2 XPMC2H                         | RNA exonuclease 4 (EC 3.1.-.-) (Exonuclease XPMC2) (Prevents mitotic catastrophe 2 protein homolog) (hPMC2)                                                                                         |
| Q9GZR7 | DDX24                                     | ATP-dependent RNA helicase DDX24 (EC 3.6.4.13) (DEAD box protein 24)                                                                                                                                |
| Q9GZS1 | POLR1E PAF53 PRAF1                        | DNA-directed RNA polymerase I subunit RPA49 (RNA polymerase I subunit A49) (DNA-directed RNA polymerase I subunit E) (RNA polymerase I-associated factor 1) (RNA polymerase I-associated factor 53) |
| Q9GZS3 | WDR61                                     | WD repeat-containing protein 61 (Meiotic recombination REC14 protein homolog) (SKI8 homolog) (Ski8) [Cleaved into: WD repeat-containing protein 61, N-terminally processed]                         |
| Q9GZT3 | SLIRP C14orf156 DC23 DC50 PD04872         | SRA stem-loop-interacting RNA-binding protein, mitochondrial                                                                                                                                        |
| Q9GZU5 | NYX CLRP                                  | Nyctalopin                                                                                                                                                                                          |
| Q9GZV1 | ANKRD2 ARPP                               | Ankyrin repeat domain-containing protein 2 (Skeletal muscle ankyrin repeat protein) (hArpp)                                                                                                         |
| Q9GZX7 | AICDA AID                                 | Single-stranded DNA cytosine deaminase (EC 3.5.4.38) (Activation-induced cytidine deaminase) (Cytidine aminohydrolase)                                                                              |
| Q9GZY0 | NXF2 TAPL2; NXF2B                         | Nuclear RNA export factor 2 (Cancer/testis antigen 39) (CT39) (TAP-like protein 2) (TAPL-2)                                                                                                         |

|        |                                                 |                                                                                                                                                                                             |
|--------|-------------------------------------------------|---------------------------------------------------------------------------------------------------------------------------------------------------------------------------------------------|
| Q9H000 | MKRN2 RNF62 HSPC070                             | Probable E3 ubiquitin-protein ligase makorin-2 (EC 6.3.2.-) (RING finger protein 62)                                                                                                        |
| Q9H074 | PAIP1                                           | Polyadenylate-binding protein-interacting protein 1 (PABP-interacting protein 1) (PAIP-1) (Poly(A)-binding protein-interacting protein 1)                                                   |
| Q9H093 | NUAK2 OMPHK2 SNARK                              | NUAK family SNF1-like kinase 2 (EC 2.7.11.1) (Omphalocele kinase 2) (SNF1/AMP kinase-related kinase) (SNARK)                                                                                |
| Q9H0A0 | NAT10 ALP KIAA1709                              | N-acetyltransferase 10 (EC 2.3.1.-)                                                                                                                                                         |
| Q9H0A6 | RNF32 FKSG33 HSD15                              | RING finger protein 32                                                                                                                                                                      |
| Q9H0D6 | XRN2                                            | 5'-3' exoribonuclease 2 (EC 3.1.13.-) (DHM1-like protein) (DHP protein)                                                                                                                     |
| Q9H0F5 | RNF38                                           | E3 ubiquitin-protein ligase RNF38 (EC 6.3.2.-) (RING finger protein 38)                                                                                                                     |
| Q9H0H0 | INTS2 KIAA1287                                  | Integrator complex subunit 2 (Int2)                                                                                                                                                         |
| Q9H0K1 | SIK2 KIAA0781 QIK SNF1LK2                       | Serine/threonine-protein kinase SIK2 (EC 2.7.11.1) (Qin-induced kinase) (Salt-inducible kinase 2) (SIK-2) (Serine/threonine-protein kinase SNF1-like kinase 2)                              |
| Q9H0K6 | PUS7L                                           | Pseudouridylate synthase 7 homolog-like protein (EC 5.4.99.-)                                                                                                                               |
| Q9H0L4 | CSTF2T KIAA0689                                 | Cleavage stimulation factor subunit 2 tau variant (CF-1 64 kDa subunit tau variant) (Cleavage stimulation factor 64 kDa subunit tau variant) (CSTF 64 kDa subunit tau variant) (TauCstF-64) |
| Q9H0M5 | ZNF700                                          | Zinc finger protein 700                                                                                                                                                                     |
| Q9H0S4 | DDX47                                           | Probable ATP-dependent RNA helicase DDX47 (EC 3.6.4.13) (DEAD box protein 47)                                                                                                               |
| Q9H0Z9 | RBM38 RNPC1 SEB4                                | RNA-binding protein 38 (CLL-associated antigen KW-5) (HSRNASEB) (RNA-binding motif protein 38) (RNA-binding region-containing protein 1) (ssDNA-binding protein SEB4)                       |
| Q9H116 | GZF1 ZBTB23 ZNF336                              | GDNF-inducible zinc finger protein 1 (Zinc finger and BTB domain-containing protein 23) (Zinc finger protein 336)                                                                           |
| Q9H156 | SLITRK2 CXorf2 KIAA1854 SLITL1 UNQ9197/PRO34756 | SLIT and NTRK-like protein 2                                                                                                                                                                |
| Q9H171 | ZBP1 C20orf183 DLM1                             | Z-DNA-binding protein 1 (Tumor stroma and activated macrophage protein DLM-1)                                                                                                               |
| Q9H1A7 | POLR2J3                                         | DNA-directed RNA polymerase II subunit RPB11-b2 (RNA polymerase II subunit B11-b2) (RPB11b2) (DNA-directed RNA polymerase II subunit J3)                                                    |
| Q9H1B4 | NXF5 TAPL1                                      | Nuclear RNA export factor 5 (TAP-like protein 1) (TAPL-1)                                                                                                                                   |
| Q9H1D9 | POLR3F                                          | DNA-directed RNA polymerase III subunit RPC6 (RNA polymerase III subunit C6) (DNA-directed RNA polymerase III subunit F) (RNA polymerase III 39 kDa subunit) (RPC39)                        |
| Q9H1H1 | GTSF1L C20orf65 FAM112A                         | Gametocyte-specific factor 1-like (Protein                                                                                                                                                  |

|        |                                    |                                                                                                                                                                                                                                                                      |
|--------|------------------------------------|----------------------------------------------------------------------------------------------------------------------------------------------------------------------------------------------------------------------------------------------------------------------|
|        |                                    | FAM112A)                                                                                                                                                                                                                                                             |
| Q9H1J1 | UPF3A RENT3A UPF3                  | Regulator of nonsense transcripts 3A (Nonsense mRNA reducing factor 3A) (Up-frameshift suppressor 3 homolog A) (hUpf3)                                                                                                                                               |
| Q9H1R3 | MYLK2                              | Myosin light chain kinase 2, skeletal/cardiac muscle (MLCK2) (EC 2.7.11.18)                                                                                                                                                                                          |
| Q9H1Z4 | WDR13                              | WD repeat-containing protein 13                                                                                                                                                                                                                                      |
| Q9H2K2 | TNKS2 PARP5B TANK2 TNKL            | Tankyrase-2 (TANK2) (EC 2.4.2.30) (ADP-ribosyltransferase diphtheria toxin-like 6) (ARTD6) (Poly [ADP-ribose] polymerase 5B) (TNKS-2) (TRF1-interacting ankyrin-related ADP-ribose polymerase 2) (Tankyrase II) (Tankyrase-like protein) (Tankyrase-related protein) |
| Q9H2R5 | KLK15                              | Kallikrein-15 (EC 3.4.21.-) (ACO protease)                                                                                                                                                                                                                           |
| Q9H2U1 | DHX36 DDX36 KIAA1488 MLEL1 RHAU    | ATP-dependent RNA helicase DHX36 (EC 3.6.4.12) (EC 3.6.4.13) (DEAH box protein 36) (G4-resolvase 1) (G4R1) (MLE-like protein 1) (RNA helicase associated with AU-rich element ARE)                                                                                   |
| Q9H2X6 | HIPK2                              | Homeodomain-interacting protein kinase 2 (hHIPk2) (EC 2.7.11.1)                                                                                                                                                                                                      |
| Q9H2Y7 | ZNF106 SH3BP3 ZFP106 ZNF474        | Zinc finger protein 106 (Zfp-106) (Zinc finger protein 474)                                                                                                                                                                                                          |
| Q9H307 | PNN DRS MEMA                       | Pinin (140 kDa nuclear and cell adhesion-related phosphoprotein) (Desmosome-associated protein) (Domain-rich serine protein) (DRS protein) (DRSP) (Melanoma metastasis clone A protein) (Nuclear protein SDK3) (SR-like protein)                                     |
| Q9H361 | PABPC3 PABP3 PABPL3                | Polyadenylate-binding protein 3 (PABP-3) (Poly(A)-binding protein 3) (Testis-specific poly(A)-binding protein)                                                                                                                                                       |
| Q9H3H1 | TRIT1 IPT MOD5                     | tRNA dimethylallyltransferase, mitochondrial (EC 2.5.1.75) (Isopentenyl-diphosphate:tRNA isopentenyltransferase) (IPP transferase) (IPPT) (hGRO1) (tRNA isopentenyltransferase) (IPTase)                                                                             |
| Q9H3J6 | C12orf65 My030                     | Probable peptide chain release factor C12orf65, mitochondrial                                                                                                                                                                                                        |
| Q9H3R0 | KDM4C GASC1 JHDM3C JMJD2C KIAA0780 | Lysine-specific demethylase 4C (EC 1.14.11.-) (Gene amplified in squamous cell carcinoma 1 protein) (GASC-1 protein) (JmjC domain-containing histone demethylation protein 3C) (Jumonji domain-containing protein 2C)                                                |
| Q9H3S3 | TMPRSS5                            | Transmembrane protease serine 5 (EC 3.4.21.-) (Spinesin)                                                                                                                                                                                                             |
| Q9H3W5 | LRRN3 Nbla10363 UNQ194/PRO220      | Leucine-rich repeat neuronal protein 3 (Neuronal leucine-rich repeat protein 3) (NLRR-3)                                                                                                                                                                             |
| Q9H4A3 | WNK1 HSN2 KDP KIAA0344 PRKWINK1    | Serine/threonine-protein kinase WNK1 (EC 2.7.11.1) (Erythrocyte 65 kDa protein) (p65) (Kinase deficient protein) (Protein kinase lysine-deficient 1) (Protein kinase with no lysine 1) (hWNK1)                                                                       |

|        |                             |                                                                                                                                                                                                                                                                                                                                              |
|--------|-----------------------------|----------------------------------------------------------------------------------------------------------------------------------------------------------------------------------------------------------------------------------------------------------------------------------------------------------------------------------------------|
| Q9H4B4 | PLK3 CNK FNK PRK            | Serine/threonine-protein kinase PLK3 (EC 2.7.11.21) (Cytokine-inducible serine/threonine-protein kinase) (FGF-inducible kinase) (Polo-like kinase 3) (PLK-3) (Proliferation-related kinase)                                                                                                                                                  |
| Q9H4D5 | NXF3 TAPL3                  | Nuclear RNA export factor 3 (TAP-like protein 3) (TAPL-3)                                                                                                                                                                                                                                                                                    |
| Q9H4K7 | MTG2 GTPBP5 OBGH1           | Mitochondrial ribosome-associated GTPase 2 (GTP-binding protein 5) (Protein obg homolog 1) (ObgH1)                                                                                                                                                                                                                                           |
| Q9H4Q4 | PRDM12 PFM9                 | PR domain zinc finger protein 12 (EC 2.1.1.-) (PR domain-containing protein 12)                                                                                                                                                                                                                                                              |
| Q9H501 | ESF1 ABTAP C20orf6 HDCMC28P | ESF1 homolog (ABT1-associated protein)                                                                                                                                                                                                                                                                                                       |
| Q9H560 | ANKRD19P ANKRD19            | Putative ankyrin repeat domain-containing protein 19 (Ankyrin repeat domain-containing protein 19 pseudogene)                                                                                                                                                                                                                                |
| Q9H583 | HEATR1 BAP28                | HEAT repeat-containing protein 1 (Protein BAP28) [Cleaved into: HEAT repeat-containing protein 1, N-terminally processed]                                                                                                                                                                                                                    |
| Q9H5H4 | ZNF768                      | Zinc finger protein 768                                                                                                                                                                                                                                                                                                                      |
| Q9H5J8 | TAF1D JOSD3                 | TATA box-binding protein-associated factor RNA polymerase I subunit D (RNA polymerase I-specific TBP-associated factor 41 kDa) (TAFI41) (TATA box-binding protein-associated factor 1D) (TBP-associated factor 1D) (Transcription initiation factor SL1/TIF-IB subunit D)                                                                    |
| Q9H5Q4 | TFB2M NS5ATP5               | Dimethyladenosine transferase 2, mitochondrial (EC 2.1.1.-) (Hepatitis C virus NS5A-transactivated protein 5) (HCV NS5A-transactivated protein 5) (Mitochondrial 12S rRNA dimethylase 2) (Mitochondrial transcription factor B2) (h-mtTFB) (h-mtTFB2) (hTFB2M) (mtTFB2) (S-adenosylmethionine-6-N', N'-adenosyl(rRNA) dimethyltransferase 2) |
| Q9H5Y7 | SLITRK6                     | SLIT and NTRK-like protein 6                                                                                                                                                                                                                                                                                                                 |
| Q9H5Z1 | DHX35 C20orf15 DDX35        | Probable ATP-dependent RNA helicase DHX35 (EC 3.6.4.13) (DEAH box protein 35)                                                                                                                                                                                                                                                                |
| Q9H607 | OCEL1                       | Occludin/ELL domain-containing protein 1                                                                                                                                                                                                                                                                                                     |
| Q9H633 | RPP21 C6orf135 CAT60        | Ribonuclease P protein subunit p21 (RNaseP protein p21) (EC 3.1.26.5) (Ribonuclease P/MRP 21 kDa subunit) (Ribonucleoprotein V)                                                                                                                                                                                                              |
| Q9H672 | ASB7                        | Ankyrin repeat and SOCS box protein 7 (ASB-7)                                                                                                                                                                                                                                                                                                |
| Q9H694 | BICC1                       | Protein bicaudal C homolog 1 (Bic-C)                                                                                                                                                                                                                                                                                                         |
| Q9H6B1 | ZNF385D ZNF659              | Zinc finger protein 385D (Zinc finger protein 659)                                                                                                                                                                                                                                                                                           |
| Q9H6F5 | CCDC86 CYCLON               | Coiled-coil domain-containing protein 86 (Cytokine-induced protein with coiled-coil domain)                                                                                                                                                                                                                                                  |
| Q9H6R0 | DHX33 DDX33                 | Putative ATP-dependent RNA helicase DHX33 (EC 3.6.4.13) (DEAH box protein 33)                                                                                                                                                                                                                                                                |



|        |                         |                                                                                                                                                                     |
|--------|-------------------------|---------------------------------------------------------------------------------------------------------------------------------------------------------------------|
| Q9H6R4 | NOL6                    | Nucleolar protein 6 (Nucleolar RNA-associated protein) (Nrap)                                                                                                       |
| Q9H6S0 | YTHDC2                  | Probable ATP-dependent RNA helicase YTHDC2 (EC 3.6.4.13) (YTH domain-containing protein 2)                                                                          |
| Q9H6T0 | ESRP2 RBM35B PP7059     | Epithelial splicing regulatory protein 2 (RNA-binding motif protein 35B) (RNA-binding protein 35B)                                                                  |
| Q9H6T3 | RPAP3                   | RNA polymerase II-associated protein 3                                                                                                                              |
| Q9H6Y2 | WDR55                   | WD repeat-containing protein 55                                                                                                                                     |
| Q9H6Y7 | RNF167 LP2254           | E3 ubiquitin-protein ligase RNF167 (EC 6.3.2.-) (RING finger protein 167) (RING105)                                                                                 |
| Q9H765 | ASB8 PP14212            | Ankyrin repeat and SOCS box protein 8 (ASB-8)                                                                                                                       |
| Q9H777 | ELAC1 D29               | Zinc phosphodiesterase ELAC protein 1 (EC 3.1.26.11) (Deleted in Ma29) (ElaC homolog protein 1) (Ribonuclease Z 1) (RNase Z 1) (tRNA 3 endonuclease 1) (tRNase Z 1) |
| Q9H790 | EXO5 C1orf176 DEM1      | Exonuclease V (Exo V) (hExo5) (EC 3.1.-.-) (Defects in morphology protein 1 homolog)                                                                                |
| Q9H7D7 | WDR26 CDW2 MIP2 PRO0852 | WD repeat-containing protein 26 (CUL4- and DDB1-associated WDR protein 2) (Myocardial ischemic preconditioning up-regulated protein 2)                              |
| Q9H7R0 | ZNF442                  | Zinc finger protein 442                                                                                                                                             |
| Q9H7R5 | ZNF665 ZFP160L          | Zinc finger protein 665 (Zinc finger protein 160-like)                                                                                                              |
| Q9H7Z3 | NRDE2 C14orf102         | Protein NRDE2 homolog                                                                                                                                               |
| Q9H7Z6 | KAT8 MOF MYST1 PP7073   | Histone acetyltransferase KAT8 (EC 2.3.1.48) (Lysine acetyltransferase 8) (MOZ, YBF2/SAS3, SAS2 and TIP60 protein 1) (MYST-1) (hMOF)                                |
| Q9H808 | TLE6                    | Transducin-like enhancer protein 6                                                                                                                                  |
| Q9H814 | PHAX RNUXA              | Phosphorylated adapter RNA export protein (RNA U small nuclear RNA export adapter protein)                                                                          |
| Q9H898 | ZMAT4                   | Zinc finger matrin-type protein 4                                                                                                                                   |
| Q9H8G1 | ZNF430                  | Zinc finger protein 430                                                                                                                                             |
| Q9H8H0 | NOL11 L14               | Nucleolar protein 11                                                                                                                                                |
| Q9H8H2 | DDX31                   | Probable ATP-dependent RNA helicase DDX31 (EC 3.6.4.13) (DEAD box protein 31) (Helicain)                                                                            |
| Q9H8X2 | IPPK C9orf12            | Inositol-pentakisphosphate 2-kinase (EC 2.7.1.158) (IPK1 homolog) (Inositol-1,3,4,5,6-pentakisphosphate 2-kinase) (Ins(1,3,4,5,6)P5 2-kinase) (InsP5 2-kinase)      |
| Q9H944 | MED20 TRFP              | Mediator of RNA polymerase II transcription subunit 20 (Mediator complex subunit 20) (TRF-proximal protein homolog) (hTRFP)                                         |
| Q9H974 | QTRTD1                  | Queuine tRNA-ribosyltransferase subunit QTRTD1 (EC 2.4.2.29) (Queuine tRNA-ribosyltransferase domain-containing protein 1)                                          |

|        |                                    |                                                                                                                                                                                                                                                            |
|--------|------------------------------------|------------------------------------------------------------------------------------------------------------------------------------------------------------------------------------------------------------------------------------------------------------|
| Q9H9A6 | LRRC40                             | Leucine-rich repeat-containing protein 40                                                                                                                                                                                                                  |
| Q9H9B1 | EHMT1 EUHMTASE1 GLP KIAA1876 KMT1D | Histone-lysine N-methyltransferase EHMT1 (EC 2.1.1.-) (EC 2.1.1.43) (Euchromatic histone-lysine N-methyltransferase 1) (Eu-HMTase1) (G9a-like protein 1) (GLP) (GLP1) (Histone H3-K9 methyltransferase 5) (H3-K9-HMTase 5) (Lysine N-methyltransferase 1D) |
| Q9H9D4 | ZNF408 PFM14 PRDM17                | Zinc finger protein 408 (PR domain zinc finger protein 17)                                                                                                                                                                                                 |
| Q9H9E1 | ANKRA2 ANKRA                       | Ankyrin repeat family A protein 2 (RFXANK-like protein 2)                                                                                                                                                                                                  |
| Q9H9G7 | AGO3 EIF2C3                        | Protein argonaute-3 (Argonaute3) (hAgo3) (Argonaute RISC catalytic component 3) (Eukaryotic translation initiation factor 2C 3) (eIF-2C 3) (eIF2C 3)                                                                                                       |
| Q9H9J2 | MRPL44                             | 39S ribosomal protein L44, mitochondrial (L44mt) (MRP-L44) (EC 3.1.26.-)                                                                                                                                                                                   |
| Q9H9L3 | ISG20L2 HSD-38 HSD38               | Interferon-stimulated 20 kDa exonuclease-like 2 (EC 3.1.-.-)                                                                                                                                                                                               |
| Q9H9Q4 | NHEJ1 XLF                          | Non-homologous end-joining factor 1 (Protein cernunnos) (XRCC4-like factor)                                                                                                                                                                                |
| Q9H9V4 | RNF122                             | RING finger protein 122                                                                                                                                                                                                                                    |
| Q9H9V9 | JMJD4                              | JmjC domain-containing protein 4 (Jumonji domain-containing protein 4)                                                                                                                                                                                     |
| Q9H9Y6 | POLR1B                             | DNA-directed RNA polymerase I subunit RPA2 (RNA polymerase I subunit 2) (EC 2.7.7.6) (DNA-directed RNA polymerase I 135 kDa polypeptide) (RPA135)                                                                                                          |
| Q9H9Z2 | LIN28A CSDD1 LIN28 ZCCHC1          | Protein lin-28 homolog A (Lin-28A) (Zinc finger CCHC domain-containing protein 1)                                                                                                                                                                          |
| Q9HA38 | ZMAT3 PAG608 WIG1                  | Zinc finger matrin-type protein 3 (Zinc finger protein WIG-1) (p53-activated gene 608 protein)                                                                                                                                                             |
| Q9HA77 | CARS2 OK/SW-cl.10                  | Probable cysteine--tRNA ligase, mitochondrial (EC 6.1.1.16) (Cysteinyl-tRNA synthetase) (CysRS)                                                                                                                                                            |
| Q9HAD4 | WDR41 MSTP048                      | WD repeat-containing protein 41                                                                                                                                                                                                                            |
| Q9HAU5 | UPF2 KIAA1408 RENT2                | Regulator of nonsense transcripts 2 (Nonsense mRNA reducing factor 2) (Up-frameshift suppressor 2 homolog) (hUpf2)                                                                                                                                         |
| Q9HAV0 | GNB4                               | Guanine nucleotide-binding protein subunit beta-4 (Transducin beta chain 4)                                                                                                                                                                                |
| Q9HAV4 | XPO5 KIAA1291 RANBP21              | Exportin-5 (Exp5) (Ran-binding protein 21)                                                                                                                                                                                                                 |
| Q9HAZ2 | PRDM16 KIAA1675 MEL1 PFM13         | PR domain zinc finger protein 16 (PR domain-containing protein 16) (Transcription factor MEL1) (MDS1/EVI1-like gene 1)                                                                                                                                     |
| Q9HB65 | ELL3                               | RNA polymerase II elongation factor ELL3                                                                                                                                                                                                                   |
| Q9HBD1 | RC3H2 MNAB RNF164                  | Roquin-2 (EC 6.3.2.-) (Membrane-associated nucleic acid-binding protein) (RING finger and CCCH-type zinc finger domain-containing protein 2) (RING finger protein 164)                                                                                     |
| Q9HBE1 | PATZ1 PATZ RIAZ ZBTB19 ZNF278 ZSG  | POZ-, AT hook-, and zinc finger-containing protein 1 (BTB/POZ domain zinc finger transcription factor) (Protein kinase A RI subunit alpha-associated                                                                                                       |

|        |                                       |                                                                                                                                                                                                          |
|--------|---------------------------------------|----------------------------------------------------------------------------------------------------------------------------------------------------------------------------------------------------------|
|        |                                       | protein) (Zinc finger and BTB domain-containing protein 19) (Zinc finger protein 278) (Zinc finger sarcoma gene protein)                                                                                 |
| Q9HBG6 | IFT122 SPG WDR10 WDR140               | Intraflagellar transport protein 122 homolog (WD repeat-containing protein 10) (WD repeat-containing protein 140)                                                                                        |
| Q9HBH9 | MKNK2 GPRK7 MNK2                      | MAP kinase-interacting serine/threonine-protein kinase 2 (EC 2.7.11.1) (MAP kinase signal-integrating kinase 2) (MAPK signal-integrating kinase 2) (Mnk2)                                                |
| Q9HBL6 | LRTM1 HT017                           | Leucine-rich repeat and transmembrane domain-containing protein 1                                                                                                                                        |
| Q9HBT7 | ZNF287 ZKSCAN13                       | Zinc finger protein 287 (Zinc finger protein with KRAB and SCAN domains 13)                                                                                                                              |
| Q9HBT8 | ZNF286A KIAA1874 ZNF286               | Zinc finger protein 286A                                                                                                                                                                                 |
| Q9HBW1 | LRRC4 BAG NAG14<br>UNQ554/PRO1111     | Leucine-rich repeat-containing protein 4 (Brain tumor-associated protein BAG) (Nasopharyngeal carcinoma-associated gene 14 protein) (Netrin-G2 ligand) (NGL-2)                                           |
| Q9HBX8 | LGR6 UNQ6427/PRO21331 VTS20631        | Leucine-rich repeat-containing G-protein coupled receptor 6                                                                                                                                              |
| Q9HBX9 | RXFP1 LGR7                            | Relaxin receptor 1 (Leucine-rich repeat-containing G-protein coupled receptor 7) (Relaxin family peptide receptor 1)                                                                                     |
| Q9HBY8 | SGK2                                  | Serine/threonine-protein kinase Sgk2 (EC 2.7.11.1) (Serum/glucocorticoid-regulated kinase 2)                                                                                                             |
| Q9HC16 | APOBEC3G MDS019                       | DNA dC->dU-editing enzyme APOBEC-3G (EC 3.5.4.-) (APOBEC-related cytidine deaminase) (APOBEC-related protein) (ARCD) (APOBEC-related protein 9) (ARP-9) (CEM-15) (CEM15) (Deoxycytidine deaminase) (A3G) |
| Q9HC35 | EML4 C2orf2 EMAPL4                    | Echinoderm microtubule-associated protein-like 4 (EMAP-4) (Restrictedly overexpressed proliferation-associated protein) (Ropp 120)                                                                       |
| Q9HC36 | RNMTL1 MRM3 HC90                      | rRNA methyltransferase 3, mitochondrial (EC 2.1.1.-) (16S rRNA (guanosine(1370)-2'-O)-methyltransferase) (16S rRNA [Gm1370] 2'-O-methyltransferase) (RNA methyltransferase-like protein 1)               |
| Q9HC98 | NEK6                                  | Serine/threonine-protein kinase Nek6 (EC 2.7.11.1) (Never in mitosis A-related kinase 6) (NimA-related protein kinase 6) (Protein kinase SID6-1512)                                                      |
| Q9HCD6 | TANC2 KIAA1148 KIAA1636               | Protein TANC2 (Tetratricopeptide repeat, ankyrin repeat and coiled-coil domain-containing protein 2)                                                                                                     |
| Q9HCE5 | METTL14 KIAA1627                      | N6-adenosine-methyltransferase subunit METTL14 (EC 2.1.1.62) (Methyltransferase-like protein 14)                                                                                                         |
| Q9HCG1 | ZNF160 KIAA1611                       | Zinc finger protein 160 (Zinc finger protein HZF5) (Zinc finger protein Kr18) (HKr18)                                                                                                                    |
| Q9HCJ2 | LRRC4C KIAA1580 NGL1<br>UNQ292/PRO331 | Leucine-rich repeat-containing protein 4C (Netrin-G1 ligand) (NGL-1)                                                                                                                                     |
| Q9HCJ3 | RAVER2 KIAA1579                       | Ribonucleoprotein PTB-binding 2 (Protein raver-2)                                                                                                                                                        |

|        |                                   |                                                                                                                                                                                                                                                                                                                                                                  |
|--------|-----------------------------------|------------------------------------------------------------------------------------------------------------------------------------------------------------------------------------------------------------------------------------------------------------------------------------------------------------------------------------------------------------------|
| Q9HCK5 | AGO4 EIF2C4 KIAA1567              | Protein argonaute-4 (Argonaute4) (hAgo4) (Argonaute RISC catalytic component 4) (Eukaryotic translation initiation factor 2C 4) (eIF-2C 4) (eIF2C 4)                                                                                                                                                                                                             |
| Q9HCL3 | ZFP14 KIAA1559 ZNF531             | Zinc finger protein 14 homolog (Zfp-14) (Zinc finger protein 531)                                                                                                                                                                                                                                                                                                |
| Q9HCM9 | TRIM39 RNF23 TFP                  | E3 ubiquitin-protein ligase TRIM39 (EC 6.3.2.-) (RING finger protein 23) (Testis-abundant finger protein) (Tripartite motif-containing protein 39)                                                                                                                                                                                                               |
| Q9HCX3 | ZNF304                            | Zinc finger protein 304                                                                                                                                                                                                                                                                                                                                          |
| Q9HD15 | SRA1 PP7684                       | Steroid receptor RNA activator 1 (Steroid receptor RNA activator protein) (SRAP)                                                                                                                                                                                                                                                                                 |
| Q9HD40 | SEPSECS TRNP48                    | O-phosphoseryl-tRNA(Sec) selenium transferase (EC 2.9.1.2) (Liver-pancreas antigen) (LP) (SLA-p35) (SLA/LP autoantigen) (Selenocysteine synthase) (Sec synthase) (Selenocysteinyl-tRNA(Sec) synthase) (Sep-tRNA:Sec-tRNA synthase) (SepSecS) (Soluble liver antigen) (SLA) (UGA suppressor tRNA-associated protein) (tRNA(Ser/Sec)-associated antigenic protein) |
| Q9NNW5 | WDR6                              | WD repeat-containing protein 6                                                                                                                                                                                                                                                                                                                                   |
| Q9NP58 | ABCB6 MTABC3 PRP UMAT             | ATP-binding cassette sub-family B member 6, mitochondrial (Mitochondrial ABC transporter 3) (Mt-ABC transporter 3) (P-glycoprotein-related protein) (Ubiquitously-expressed mammalian ABC half transporter)                                                                                                                                                      |
| Q9NP64 | ZCCHC17 PS1D HSPC243 HSPC251 LDC4 | Nucleolar protein of 40 kDa (pNO40) (Pnn-interacting nucleolar protein) (Putative S1 RNA-binding domain protein) (PS1D protein) (Zinc finger CCHC domain-containing protein 17)                                                                                                                                                                                  |
| Q9NP77 | SSU72 HSPC182 PNAS-120            | RNA polymerase II subunit A C-terminal domain phosphatase SSU72 (CTD phosphatase SSU72) (EC 3.1.3.16)                                                                                                                                                                                                                                                            |
| Q9NP78 | ABCB9 KIAA1520                    | ATP-binding cassette sub-family B member 9 (ATP-binding cassette transporter 9) (ABC transporter 9 protein) (hABCB9) (TAP-like protein) (TAPL)                                                                                                                                                                                                                   |
| Q9NP81 | SARS2 SARSM                       | Serine--tRNA ligase, mitochondrial (EC 6.1.1.11) (SerRSmt) (Seryl-tRNA synthetase) (SerRS) (Seryl-tRNA(Ser/Sec) synthetase)                                                                                                                                                                                                                                      |
| Q9NP92 | MRPS30 PDCD9 BM-047               | 28S ribosomal protein S30, mitochondrial (MRP-S30) (S30mt) (Programmed cell death protein 9)                                                                                                                                                                                                                                                                     |
| Q9NPC7 | MYNN OSZF ZBTB31 SBBIZ1           | Myoneurin (Zinc finger and BTB domain-containing protein 31)                                                                                                                                                                                                                                                                                                     |
| Q9NPD3 | EXOSC4 RRP41 SKI6                 | Exosome complex component RRP41 (Exosome component 4) (Ribosomal RNA-processing protein 41) (p12A)                                                                                                                                                                                                                                                               |
| Q9NPE3 | NOP10 NOLA3                       | H/ACA ribonucleoprotein complex subunit 3 (Nucleolar protein 10) (Nucleolar protein family A member 3) (snoRNP protein NOP10)                                                                                                                                                                                                                                    |

|        |                           |                                                                                                                                                                               |
|--------|---------------------------|-------------------------------------------------------------------------------------------------------------------------------------------------------------------------------|
| Q9NPI6 | DCP1A SMIF                | mRNA-decapping enzyme 1A (EC 3.-.-.-) (Smad4-interacting transcriptional co-activator) (Transcription factor SMIF)                                                            |
| Q9NPI8 | FANCF                     | Fanconi anemia group F protein (Protein FAF)                                                                                                                                  |
| Q9NQ29 | LUC7L LUC7L1              | Putative RNA-binding protein Luc7-like 1 (Putative SR protein LUC7B1) (SR+89)                                                                                                 |
| Q9NQ39 | RPS10P5 RPS10L            | Putative 40S ribosomal protein S10-like                                                                                                                                       |
| Q9NQ50 | MRPL40 NLVCF URIM         | 39S ribosomal protein L40, mitochondrial (L40mt) (MRP-L40) (Nuclear localization signal-containing protein deleted in velocardiofacial syndrome) (Up-regulated in metastasis) |
| Q9NQ94 | A1CF ACF ASP              | APOBEC1 complementation factor (APOBEC1-stimulating protein)                                                                                                                  |
| Q9NQE9 | HINT3                     | Histidine triad nucleotide-binding protein 3 (HINT-3) (EC 3.-.-.-)                                                                                                            |
| Q9NQI0 | DDX4 VASA                 | Probable ATP-dependent RNA helicase DDX4 (EC 3.6.4.13) (DEAD box protein 4) (Vasa homolog)                                                                                    |
| Q9NQT4 | EXOSC5 CML28 RRP46        | Exosome complex component RRP46 (Chronic myelogenous leukemia tumor antigen 28) (Exosome component 5) (Ribosomal RNA-processing protein 46) (p12B)                            |
| Q9NQU5 | PAK6 PAK5                 | Serine/threonine-protein kinase PAK 6 (EC 2.7.11.1) (PAK-5) (p21-activated kinase 6) (PAK-6)                                                                                  |
| Q9NQV6 | PRDM10 KIAA1231 PFM7 TRIS | PR domain zinc finger protein 10 (EC 2.1.1.-) (PR domain-containing protein 10) (Tristanin)                                                                                   |
| Q9NQV7 | PRDM9 PFM6                | Histone-lysine N-methyltransferase PRDM9 (EC 2.1.1.43) (PR domain zinc finger protein 9) (PR domain-containing protein 9)                                                     |
| Q9NQX1 | PRDM5 PFM2                | PR domain zinc finger protein 5 (EC 2.1.1.-) (PR domain-containing protein 5)                                                                                                 |
| Q9NQX6 | ZNF331 RITA ZNF361 ZNF463 | Zinc finger protein 331 (C2H2-like zinc finger protein rearranged in thyroid adenomas) (Zinc finger protein 361) (Zinc finger protein 463)                                    |
| Q9NQZ2 | UTP3 CRLZ1 SAS10          | Something about silencing protein 10 (Charged amino acid-rich leucine zipper 1) (CRL1) (Disrupter of silencing SAS10) (UTP3 homolog)                                          |
| Q9NQZ3 | DAZ1 DAZ SPGY             | Deleted in azoospermia protein 1                                                                                                                                              |
| Q9NQZ8 | ZNF71 EZFIT               | Endothelial zinc finger protein induced by tumor necrosis factor alpha (Zinc finger protein 71)                                                                               |
| Q9NR20 | DYRK4                     | Dual specificity tyrosine-phosphorylation-regulated kinase 4 (EC 2.7.12.1)                                                                                                    |
| Q9NR30 | DDX21                     | Nucleolar RNA helicase 2 (EC 3.6.4.13) (DEAD box protein 21) (Gu-alpha) (Nucleolar RNA helicase Gu) (Nucleolar RNA helicase II) (RH II/Gu)                                    |
| Q9NR56 | MBNL1 EXP KIAA0428 MBNL   | Muscleblind-like protein 1 (Triplet-expansion RNA-binding protein)                                                                                                            |
| Q9NR90 | DAZ3                      | Deleted in azoospermia protein 3                                                                                                                                              |

|        |                                |                                                                                                                                                                                                 |
|--------|--------------------------------|-------------------------------------------------------------------------------------------------------------------------------------------------------------------------------------------------|
| Q9NR96 | TLR9 UNQ5798/PRO19605          | Toll-like receptor 9 (CD antigen CD289)                                                                                                                                                         |
| Q9NR97 | TLR8 UNQ249/PRO286             | Toll-like receptor 8 (CD antigen CD288)                                                                                                                                                         |
| Q9NRA8 | EIF4ENIF1                      | Eukaryotic translation initiation factor 4E transporter (4E-T) (eIF4E transporter) (Eukaryotic translation initiation factor 4E nuclear import factor 1)                                        |
| Q9NRH2 | SNRK KIAA0096 SNFRK            | SNF-related serine/threonine-protein kinase (EC 2.7.11.1) (SNF1-related kinase)                                                                                                                 |
| Q9NRJ5 | PAPOLB PAPT                    | Poly(A) polymerase beta (PAP-beta) (EC 2.7.7.19) (Polynucleotide adenylyltransferase beta) (Testis-specific poly(A) polymerase)                                                                 |
| Q9NRK6 | ABCB10                         | ATP-binding cassette sub-family B member 10, mitochondrial (ATP-binding cassette transporter 10) (ABC transporter 10 protein) (Mitochondrial ATP-binding cassette 2) (M-ABC2)                   |
| Q9NRL3 | STRN4 ZIN                      | Striatin-4 (Zinedin)                                                                                                                                                                            |
| Q9NRM7 | LATS2 KPM                      | Serine/threonine-protein kinase LATS2 (EC 2.7.11.1) (Kinase phosphorylated during mitosis protein) (Large tumor suppressor homolog 2) (Serine/threonine-protein kinase kpm) (Warts-like kinase) |
| Q9NRP7 | STK36 KIAA1278                 | Serine/threonine-protein kinase 36 (EC 2.7.11.1) (Fused homolog)                                                                                                                                |
| Q9NRR2 | TPSG1 PRSS31 TMT               | Tryptase gamma (EC 3.4.21.-) (Serine protease 31) (Transmembrane tryptase) [Cleaved into: Tryptase gamma light chain; Tryptase gamma heavy chain]                                               |
| Q9NRR4 | DROSHA RN3 RNASE3L RNASEN      | Ribonuclease 3 (EC 3.1.26.3) (Protein Drosha) (Ribonuclease III) (RNase III) (p241)                                                                                                             |
| Q9NRS4 | TMPRSS4 TMPRSS3 UNQ776/PRO1570 | Transmembrane protease serine 4 (EC 3.4.21.-) (Channel-activating protease 2) (CAPH2) (Membrane-type serine protease 2) (MT-SP2)                                                                |
| Q9NRW3 | APOBEC3C APOBEC1L PBI          | DNA dC->dU-editing enzyme APOBEC-3C (A3C) (EC 3.5.4.-) (APOBEC1-like) (Phorbolin I)                                                                                                             |
| Q9NRX1 | PNO1                           | RNA-binding protein PNO1                                                                                                                                                                        |
| Q9NRX2 | MRPL17 LIP2                    | 39S ribosomal protein L17, mitochondrial (L17mt) (MRP-L17) (LYST-interacting protein 2)                                                                                                         |
| Q9NS39 | ADARB2 ADAR3 RED2              | Double-stranded RNA-specific editase B2 (EC 3.5.-.-) (RNA-dependent adenosine deaminase 3) (RNA-editing deaminase 2) (RNA-editing enzyme 2) (dsRNA adenosine deaminase B2)                      |
| Q9NS91 | RAD18 RNF73                    | E3 ubiquitin-protein ligase RAD18 (EC 6.3.2.-) (Postreplication repair protein RAD18) (hHR18) (hRAD18) (RING finger protein 73)                                                                 |
| Q9NSC2 | SALL1 SAL1 ZNF794              | Sal-like protein 1 (Spalt-like transcription factor 1) (Zinc finger protein 794) (Zinc finger protein SALL1) (Zinc finger protein Spalt-1) (HSal1) (Sal-1)                                      |
| Q9NSD4 | ZNF275                         | Zinc finger protein 275                                                                                                                                                                         |

|        |                            |                                                                                                                                                                                                                                            |
|--------|----------------------------|--------------------------------------------------------------------------------------------------------------------------------------------------------------------------------------------------------------------------------------------|
| Q9NSD9 | FARSB FARSLB FRSB HSPC173  | Phenylalanine--tRNA ligase beta subunit (EC 6.1.1.20) (Phenylalanyl-tRNA synthetase beta subunit) (PheRS)                                                                                                                                  |
| Q9NSE4 | IARS2                      | Isoleucine--tRNA ligase, mitochondrial (EC 6.1.1.5) (Isoleucyl-tRNA synthetase) (IleRS)                                                                                                                                                    |
| Q9NSI2 | FAM207A C21orf70 PRED56    | Protein FAM207A                                                                                                                                                                                                                            |
| Q9NSI6 | BRWD1 C21orf107 WDR9       | Bromodomain and WD repeat-containing protein 1 (WD repeat-containing protein 9)                                                                                                                                                            |
| Q9NSQ0 | RRP7BP RRP7B               | Putative ribosomal RNA-processing protein 7 homolog B (Putative gastric cancer antigen Zg14-like protein)                                                                                                                                  |
| Q9NT99 | LRRC4B LRIG4               | Leucine-rich repeat-containing protein 4B (Netrin-G3 ligand) (NGL-3)                                                                                                                                                                       |
| Q9NTK5 | OLA1 GTPBP9 PRO2455 PTD004 | Obg-like ATPase 1 (DNA damage-regulated overexpressed in cancer 45) (DOC45) (GTP-binding protein 9)                                                                                                                                        |
| Q9NTZ6 | RBM12 KIAA0765 HRIHFB2091  | RNA-binding protein 12 (RNA-binding motif protein 12) (SH3/WW domain anchor protein in the nucleus) (SWAN)                                                                                                                                 |
| Q9NU02 | ANKEF1 ANKRD5              | Ankyrin repeat and EF-hand domain-containing protein 1 (Ankyrin repeat domain-containing protein 5)                                                                                                                                        |
| Q9NUK0 | MBNL3 CHCR MBLX39 MBXL     | Muscleblind-like protein 3 (Cys3His CCG1-required protein) (Muscleblind-like X-linked protein) (Protein HCHCR)                                                                                                                             |
| Q9NUL3 | STAU2                      | Double-stranded RNA-binding protein Stau1 homolog 2                                                                                                                                                                                        |
| Q9NUL7 | DDX28 MDDX28               | Probable ATP-dependent RNA helicase DDX28 (EC 3.6.4.13) (Mitochondrial DEAD box protein 28)                                                                                                                                                |
| Q9NUP7 | TRMT13 CCDC76              | tRNA:m(4)X modification enzyme TRMT13 homolog (EC 2.1.1.225) (Coiled-coil domain-containing protein 76)                                                                                                                                    |
| Q9NUQ8 | ABCF3                      | ATP-binding cassette sub-family F member 3                                                                                                                                                                                                 |
| Q9NUU7 | DDX19A DDX19L              | ATP-dependent RNA helicase DDX19A (EC 3.6.4.13) (DDX19-like protein) (DEAD box protein 19A)                                                                                                                                                |
| Q9NUX5 | POT1                       | Protection of telomeres protein 1 (hPot1) (POT1-like telomere end-binding protein)                                                                                                                                                         |
| Q9NV06 | DCAF13 WDSOF1 HSPC064      | DDB1- and CUL4-associated factor 13 (WD repeat and SOF domain-containing protein 1)                                                                                                                                                        |
| Q9NV66 | TYW1 RSAFD1                | S-adenosyl-L-methionine-dependent tRNA 4-demethylwyosine synthase (EC 4.1.3.44) (Radical S-adenosyl methionine and flavodoxin domain-containing protein 1) (tRNA wybutosine-synthesizing protein 1 homolog) (tRNA-yW-synthesizing protein) |
| Q9NV72 | ZNF701                     | Zinc finger protein 701                                                                                                                                                                                                                    |
| Q9NVH0 | EXD2 C14orf114 EXDL2       | Exonuclease 3'-5' domain-containing protein 2 (Exonuclease 3'-5' domain-like-containing protein 2)                                                                                                                                         |
| Q9NVP1 | DDX18                      | ATP-dependent RNA helicase DDX18 (EC 3.6.4.13) (DEAD box protein 18) (Myc-regulated DEAD box protein) (MrDb)                                                                                                                               |
| Q9NVR5 | DNAAF2 C14orf104 KTU       | Protein kintoun (Dynein assembly factor 2, axonemal)                                                                                                                                                                                       |

|        |                               |                                                                                                                                                                                                          |
|--------|-------------------------------|----------------------------------------------------------------------------------------------------------------------------------------------------------------------------------------------------------|
| Q9NVS2 | MRPS18A                       | 28S ribosomal protein S18a, mitochondrial (MRP-S18-a) (Mrps18a) (S18mt-a) (28S ribosomal protein S18-3, mitochondrial) (MRP-S18-3)                                                                       |
| Q9NVU0 | POLR3E KIAA1452               | DNA-directed RNA polymerase III subunit RPC5 (RNA polymerase III subunit C5) (DNA-directed RNA polymerase III 80 kDa polypeptide)                                                                        |
| Q9NVW2 | RLIM RNF12                    | E3 ubiquitin-protein ligase RLIM (EC 6.3.2.-) (LIM domain-interacting RING finger protein) (RING finger LIM domain-binding protein) (R-LIM) (RING finger protein 12) (Renal carcinoma antigen NY-REN-43) |
| Q9NVX2 | NLE1 HUSSY-07                 | Notchless protein homolog 1                                                                                                                                                                              |
| Q9NW07 | ZNF358                        | Zinc finger protein 358                                                                                                                                                                                  |
| Q9NW08 | POLR3B                        | DNA-directed RNA polymerase III subunit RPC2 (RNA polymerase III subunit C2) (EC 2.7.7.6) (C128) (DNA-directed RNA polymerase III 127.6 kDa polypeptide) (DNA-directed RNA polymerase III subunit B)     |
| Q9NW13 | RBM28                         | RNA-binding protein 28 (RNA-binding motif protein 28)                                                                                                                                                    |
| Q9NW64 | RBM22 ZC3H16 199G4            | Pre-mRNA-splicing factor RBM22 (RNA-binding motif protein 22) (Zinc finger CCCH domain-containing protein 16)                                                                                            |
| Q9NW75 | GPATCH2 GPATC2                | G patch domain-containing protein 2                                                                                                                                                                      |
| Q9NW82 | WDR70                         | WD repeat-containing protein 70                                                                                                                                                                          |
| Q9NWB1 | RBFOX1 A2BP A2BP1 FOX1 HRNBP1 | RNA binding protein fox-1 homolog 1 (Ataxin-2-binding protein 1) (Fox-1 homolog A) (Hexaribonucleotide-binding protein 1)                                                                                |
| Q9NWH9 | SLTM MET                      | SAFB-like transcription modulator (Modulator of estrogen-induced transcription)                                                                                                                          |
| Q9NWS0 | PIH1D1 NOP17                  | PIH1 domain-containing protein 1 (Nucleolar protein 17 homolog)                                                                                                                                          |
| Q9NWT1 | PAK1IP1 PIP1 WDR84            | p21-activated protein kinase-interacting protein 1 (PAK/PLC-interacting protein 1) (hPIP1) (PAK1-interacting protein 1) (WD repeat-containing protein 84)                                                |
| Q9NWT8 | AURKAIP1 AIP AKIP MRPS38      | Aurora kinase A-interacting protein (AURKA-interacting protein) (28S ribosomal protein S38, mitochondrial) (MRP-S38)                                                                                     |
| Q9NWX5 | ASB6                          | Ankyrin repeat and SOCS box protein 6 (ASB-6)                                                                                                                                                            |
| Q9NWX6 | THG1L ICF45                   | Probable tRNA(His) guanylyltransferase (EC 2.7.7.79) (Interphase cytoplasmic foci protein 45) (tRNA-histidine guanylyltransferase)                                                                       |
| Q9NWZ3 | IRAK4                         | Interleukin-1 receptor-associated kinase 4 (IRAK-4) (EC 2.7.11.1) (Renal carcinoma antigen NY-REN-64)                                                                                                    |
| Q9NWZ8 | GEMIN8 FAM51A1                | Gem-associated protein 8 (Gemin-8) (Protein FAM51A1)                                                                                                                                                     |
| Q9NX07 | TRNAU1AP SECP43 TRSPAP1       | tRNA selenocysteine 1-associated protein 1                                                                                                                                                               |



|        |                                            |                                                                                                                                                                                                  |
|--------|--------------------------------------------|--------------------------------------------------------------------------------------------------------------------------------------------------------------------------------------------------|
|        |                                            | (SECp43) (tRNA selenocysteine-associated protein 1)                                                                                                                                              |
| Q9NX20 | MRPL16 PNAS-111                            | 39S ribosomal protein L16, mitochondrial (L16mt) (MRP-L16)                                                                                                                                       |
| Q9NX24 | NHP2 NOLA2 HSPC286                         | H/ACA ribonucleoprotein complex subunit 2 (Nucleolar protein family A member 2) (snoRNP protein NHP2)                                                                                            |
| Q9NX65 | ZSCAN32 ZNF434 HCCS5                       | Zinc finger and SCAN domain-containing protein 32 (Human cervical cancer suppressor gene 5 protein) (HCCS-5) (Zinc finger protein 434)                                                           |
| Q9NX74 | DUS2 DUS2L                                 | tRNA-dihydrouridine(20) synthase [NAD(P)+]-like (EC 1.3.1.-) (Dihydrouridine synthase 2) (Up-regulated in lung cancer protein 8) (URLC8) (tRNA-dihydrouridine synthase 2-like) (hDUS2)           |
| Q9NXG2 | THUMPD1                                    | THUMP domain-containing protein 1                                                                                                                                                                |
| Q9NXH9 | TRMT1                                      | tRNA (guanine(26)-N(2))-dimethyltransferase (EC 2.1.1.216) (tRNA 2,2-dimethylguanosine-26 methyltransferase) (tRNA(guanine-26,N(2)-N(2)) methyltransferase) (tRNA(m(2,2)G26)dimethyltransferase) |
| Q9NXL6 | SIDT1                                      | SID1 transmembrane family member 1                                                                                                                                                               |
| Q9NXT0 | ZNF586                                     | Zinc finger protein 586                                                                                                                                                                          |
| Q9NXZ2 | DDX43 HAGE                                 | Probable ATP-dependent RNA helicase DDX43 (EC 3.6.4.13) (Cancer/testis antigen 13) (CT13) (DEAD box protein 43) (DEAD box protein HAGE) (Helical antigen)                                        |
| Q9NY12 | GAR1 NOLA1                                 | H/ACA ribonucleoprotein complex subunit 1 (Nucleolar protein family A member 1) (snoRNP protein GAR1)                                                                                            |
| Q9NY57 | STK32B YANK2 UNQ3003/PRO9744               | Serine/threonine-protein kinase 32B (EC 2.7.11.1) (Yet another novel kinase 2)                                                                                                                   |
| Q9NY93 | DDX56 DDX21 NOH61                          | Probable ATP-dependent RNA helicase DDX56 (EC 3.6.4.13) (ATP-dependent 61 kDa nucleolar RNA helicase) (DEAD box protein 21) (DEAD box protein 56)                                                |
| Q9NYF8 | BCLAF1 BTF KIAA0164                        | Bcl-2-associated transcription factor 1 (Btf)                                                                                                                                                    |
| Q9NYH9 | UTP6 C17orf40 HCA66 MHAT                   | U3 small nucleolar RNA-associated protein 6 homolog (Hepatocellular carcinoma-associated antigen 66) (Multiple hat domains protein)                                                              |
| Q9NYK1 | TLR7 UNQ248/PRO285                         | Toll-like receptor 7                                                                                                                                                                             |
| Q9NYK5 | MRPL39 C21orf92 MRPL5 RPML5 MSTP003 PRED22 | 39S ribosomal protein L39, mitochondrial (L39mt) (MRP-L39) (39S ribosomal protein L5, mitochondrial) (L5mt) (MRP-L5)                                                                             |
| Q9NYS7 | WSB2                                       | WD repeat and SOCS box-containing protein 2 (WSB-2) (CS box-containing WD protein)                                                                                                               |
| Q9NYT6 | ZNF226                                     | Zinc finger protein 226                                                                                                                                                                          |
| Q9NYV4 | CDK12 CRK7 CRKRS KIAA0904                  | Cyclin-dependent kinase 12 (EC 2.7.11.22) (EC 2.7.11.23) (Cdc2-related kinase, arginine/serine-rich) (CrkRS) (Cell division cycle 2-related protein kinase 7) (CDC2-                             |

|        |                                        |                                                                                                                                                                                                                                                   |
|--------|----------------------------------------|---------------------------------------------------------------------------------------------------------------------------------------------------------------------------------------------------------------------------------------------------|
|        |                                        | related protein kinase 7) (Cell division protein kinase 12) (hCDK12)                                                                                                                                                                              |
| Q9NYW8 | RBAK ZNF769                            | RB-associated KRAB zinc finger protein (RB-associated KRAB repressor) (hRBaK) (Zinc finger protein 769)                                                                                                                                           |
| Q9NYY3 | PLK2 SNK                               | Serine/threonine-protein kinase PLK2 (EC 2.7.11.21) (Polo-like kinase 2) (PLK-2) (hPlk2) (Serine/threonine-protein kinase SNK) (hSNK) (Serum-inducible kinase)                                                                                    |
| Q9NYY8 | FASTKD2 KIAA0971                       | FAST kinase domain-containing protein 2                                                                                                                                                                                                           |
| Q9NZI8 | IGF2BP1 CRDBP VICKZ1 ZBP1              | Insulin-like growth factor 2 mRNA-binding protein 1 (IGF2 mRNA-binding protein 1) (IMP-1) (IMP1) (Coding region determinant-binding protein) (CRD-BP) (IGF-II mRNA-binding protein 1) (VICKZ family member 1) (Zipcode-binding protein 1) (ZBP-1) |
| Q9NZJ0 | DTL CDT2 CDW1 DCAF2 L2DTL RAMP         | Denticleless protein homolog (DDB1- and CUL4-associated factor 2) (Lethal(2) denticleless protein homolog) (Retinoic acid-regulated nuclear matrix-associated protein)                                                                            |
| Q9NZL3 | ZNF224 BMZF2 KOX22 ZNF233 ZNF255 ZNF27 | Zinc finger protein 224 (Bone marrow zinc finger 2) (BMZF-2) (Zinc finger protein 233) (Zinc finger protein 255) (Zinc finger protein 27) (Zinc finger protein KOX22)                                                                             |
| Q9NZM5 | GLTSCR2                                | Glioma tumor suppressor candidate region gene 2 protein (p60)                                                                                                                                                                                     |
| Q9NZP8 | C1RL C1RL1 C1RLP CLSPA                 | Complement C1r subcomponent-like protein (C1r-LP) (C1r-like protein) (EC 3.4.21.-) (C1r-like serine protease analog protein) (CLSPa)                                                                                                              |
| Q9NZU0 | FLRT3 KIAA1469 UNQ856/PRO1865          | Leucine-rich repeat transmembrane protein FLRT3 (Fibronectin-like domain-containing leucine-rich transmembrane protein 3)                                                                                                                         |
| Q9NZU1 | FLRT1 UNQ752/PRO1483                   | Leucine-rich repeat transmembrane protein FLRT1 (Fibronectin-like domain-containing leucine-rich transmembrane protein 1)                                                                                                                         |
| Q9P013 | CWC15 C11orf5 AD-002 HSPC148           | Spliceosome-associated protein CWC15 homolog                                                                                                                                                                                                      |
| Q9P015 | MRPL15 HSPC145                         | 39S ribosomal protein L15, mitochondrial (L15mt) (MRP-L15)                                                                                                                                                                                        |
| Q9P016 | THYN1 THY28 HSPC144 MDS012 My0054      | Thymocyte nuclear protein 1 (Thymocyte protein Thy28)                                                                                                                                                                                             |
| Q9P0G3 | KLK14 KLKL6                            | Kallikrein-14 (hK14) (EC 3.4.21.-) (Kallikrein-like protein 6) (KLK-L6)                                                                                                                                                                           |
| Q9P0K7 | RAI14 KIAA1334 NORPEG                  | Ankycorbin (Ankyrin repeat and coiled-coil structure-containing protein) (Novel retinal pigment epithelial cell protein) (Retinoic acid-induced protein 14)                                                                                       |
| Q9P0L1 | ZKSCAN7 ZNF167 ZNF448 ZNF64            | Zinc finger protein with KRAB and SCAN domains 7 (Zinc finger protein 167) (Zinc finger protein 448) (Zinc finger protein 64)                                                                                                                     |
| Q9P0L2 | MARK1 KIAA1477 MARK                    | Serine/threonine-protein kinase MARK1 (EC 2.7.11.1) (EC 2.7.11.26) (MAP/microtubule affinity-regulating kinase 1) (PAR1 homolog c) (Par-1c)                                                                                                       |

|        |                        |                                                                                                                                                                                                 |
|--------|------------------------|-------------------------------------------------------------------------------------------------------------------------------------------------------------------------------------------------|
|        |                        | (Par1c)                                                                                                                                                                                         |
| Q9P0M2 | AKAP7 AKAP18           | A-kinase anchor protein 7 isoform gamma (AKAP-7 isoform gamma) (A-kinase anchor protein 18 kDa) (AKAP 18) (Protein kinase A-anchoring protein 7 isoform gamma) (PRKA7 isoform gamma)            |
| Q9P0M9 | MRPL27 HSPC250         | 39S ribosomal protein L27, mitochondrial (L27mt) (MRP-L27)                                                                                                                                      |
| Q9P0P0 | RNF181 HSPC238         | E3 ubiquitin-protein ligase RNF181 (EC 6.3.2.-) (RING finger protein 181)                                                                                                                       |
| Q9P1W8 | SIRPG SIRPB2           | Signal-regulatory protein gamma (SIRP-gamma) (CD172 antigen-like family member B) (Signal-regulatory protein beta-2) (SIRP-b2) (SIRP-beta-2) (CD antigen CD172g)                                |
| Q9P1W9 | PIM2                   | Serine/threonine-protein kinase pim-2 (EC 2.7.11.1) (Pim-2h)                                                                                                                                    |
| Q9P244 | LRFN1 KIAA1484 SALM2   | Leucine-rich repeat and fibronectin type III domain-containing protein 1 (Synaptic adhesion-like molecule 2)                                                                                    |
| Q9P255 | ZNF492 KIAA1473 ZNF115 | Zinc finger protein 492 (Zinc finger protein 115)                                                                                                                                               |
| Q9P286 | PAK7 KIAA1264 PAK5     | Serine/threonine-protein kinase PAK 7 (EC 2.7.11.1) (p21-activated kinase 5) (PAK-5) (p21-activated kinase 7) (PAK-7)                                                                           |
| Q9P289 | STK26 MASK MST4        | Serine/threonine-protein kinase 26 (EC 2.7.11.1) (MST3 and SOK1-related kinase) (Mammalian STE20-like protein kinase 4) (MST-4) (STE20-like kinase MST4) (Serine/threonine-protein kinase MASK) |
| Q9P2F9 | ZNF319 KIAA1388        | Zinc finger protein 319                                                                                                                                                                         |
| Q9P2H3 | IFT80 KIAA1374 WDR56   | Intraflagellar transport protein 80 homolog (WD repeat-containing protein 56)                                                                                                                   |
| Q9P2I0 | CPSF2 CPSF100 KIAA1367 | Cleavage and polyadenylation specificity factor subunit 2 (Cleavage and polyadenylation specificity factor 100 kDa subunit) (CPSF 100 kDa subunit)                                              |
| Q9P2J5 | LARS KIAA1352          | Leucine--tRNA ligase, cytoplasmic (EC 6.1.1.4) (Leucyl-tRNA synthetase) (LeuRS)                                                                                                                 |
| Q9P2J8 | ZNF624 KIAA1349        | Zinc finger protein 624                                                                                                                                                                         |
| Q9P2K5 | MYEF2 KIAA1341         | Myelin expression factor 2 (MEF-2) (MyEF-2) (MST156)                                                                                                                                            |
| Q9P2K8 | EIF2AK4 GCN2 KIAA1338  | Eukaryotic translation initiation factor 2-alpha kinase 4 (EC 2.7.11.1) (GCN2-like protein)                                                                                                     |
| Q9P2N5 | RBM27 KIAA1311         | RNA-binding protein 27 (RNA-binding motif protein 27)                                                                                                                                           |
| Q9P2R3 | ANKFY1 ANKHZN KIAA1255 | Rabankyrin-5 (Rank-5) (Ankyrin repeat and FYVE domain-containing protein 1) (Ankyrin repeats hooked to a zinc finger motif)                                                                     |
| Q9P2S6 | ANKMY1 TSAL1 ZMYND13   | Ankyrin repeat and MYND domain-containing protein 1 (Testis-specific ankyrin-like protein 1) (Zinc finger MYND domain-containing protein 13)                                                    |
| Q9QC07 | ERVK-18                | Endogenous retrovirus group K member 18 Pol protein (HERV-K(C1a) Pol protein) (HERV-K110 Pol protein) (HERV-K18 Pol                                                                             |

|        |                                  |                                                                                                                                                                                                                                                                                                              |
|--------|----------------------------------|--------------------------------------------------------------------------------------------------------------------------------------------------------------------------------------------------------------------------------------------------------------------------------------------------------------|
|        |                                  | protein) (HERV-K_1q23.3 provirus ancestral Pol protein) [Includes: Reverse transcriptase (EC 2.7.7.49); Ribonuclease H (RNase H) (EC 3.1.26.4)]                                                                                                                                                              |
| Q9UBB9 | TFIP11 STIP HSPC006              | Tuftelin-interacting protein 11 (Septin and tuftelin-interacting protein 1) (STIP-1)                                                                                                                                                                                                                         |
| Q9UBE8 | NLK LAK1                         | Serine/threonine-protein kinase NLK (EC 2.7.11.24) (Nemo-like kinase) (Protein LAK1)                                                                                                                                                                                                                         |
| Q9UBI6 | GNG12                            | Guanine nucleotide-binding protein G(I)/G(S)/G(O) subunit gamma-12                                                                                                                                                                                                                                           |
| Q9UBS0 | RPS6KB2 STK14B                   | Ribosomal protein S6 kinase beta-2 (S6K-beta-2) (S6K2) (EC 2.7.11.1) (70 kDa ribosomal protein S6 kinase 2) (P70S6K2) (p70-S6K 2) (S6 kinase-related kinase) (SRK) (Serine/threonine-protein kinase 14B) (p70 ribosomal S6 kinase beta) (S6K-beta) (p70 S6 kinase beta) (p70 S6K-beta) (p70 S6KB) (p70-beta) |
| Q9UBU9 | NXF1 TAP                         | Nuclear RNA export factor 1 (Tip-associated protein) (Tip-associating protein) (mRNA export factor TAP)                                                                                                                                                                                                      |
| Q9UBX7 | KLK11 PRSS20 TLSP UNQ649/PRO1279 | Kallikrein-11 (hK11) (EC 3.4.21.-) (Hippostasin) (Serine protease 20) (Trypsin-like protease) [Cleaved into: Kallikrein-11 inactive chain 1; Kallikrein-11 inactive chain 2]                                                                                                                                 |
| Q9UC06 | ZNF70                            | Zinc finger protein 70 (Zinc finger protein N27C7-1)                                                                                                                                                                                                                                                         |
| Q9UC07 | ZNF69                            | Zinc finger protein 69 (hZNF3)                                                                                                                                                                                                                                                                               |
| Q9UEE5 | STK17A DRAK1                     | Serine/threonine-protein kinase 17A (EC 2.7.11.1) (DAP kinase-related apoptosis-inducing protein kinase 1)                                                                                                                                                                                                   |
| Q9UEG4 | ZNF629 KIAA0326 ZNF65            | Zinc finger protein 629 (Zinc finger protein 65)                                                                                                                                                                                                                                                             |
| Q9UET6 | FTSJ1 JM23                       | Putative tRNA (cytidine(32)/guanosine(34)-2'-O)-methyltransferase (EC 2.1.1.205) (2'-O-ribose RNA methyltransferase TRM7 homolog) (Protein ftsJ homolog 1)                                                                                                                                                   |
| Q9UEW8 | STK39 SPAK                       | STE20/SPS1-related proline-alanine-rich protein kinase (Ste-20-related kinase) (EC 2.7.11.1) (DCHT) (Serine/threonine-protein kinase 39)                                                                                                                                                                     |
| Q9UFF9 | CNOT8 CALIF POP2                 | CCR4-NOT transcription complex subunit 8 (EC 3.1.13.4) (CAF1-like protein) (CALIFp) (CAF2) (CCR4-associated factor 8) (Caf1b)                                                                                                                                                                                |
| Q9UG63 | ABCF2 HUSSY-18                   | ATP-binding cassette sub-family F member 2 (Iron-inhibited ABC transporter 2)                                                                                                                                                                                                                                |
| Q9UGC7 | MTRF1L MTRF1A                    | Peptide chain release factor 1-like, mitochondrial (Mitochondrial translational release factor 1-like) (mtRF1a)                                                                                                                                                                                              |
| Q9UGL1 | KDM5B JARID1B PLU1 RBBP2H1       | Lysine-specific demethylase 5B (EC 1.14.11.-) (Cancer/testis antigen 31) (CT31) (Histone demethylase JARID1B) (Jumonji/ARID domain-containing protein 1B) (PLU-1) (Retinoblastoma-binding protein 2 homolog 1) (RBP2-H1)                                                                                     |

|        |                                |                                                                                                                                                                                                                            |
|--------|--------------------------------|----------------------------------------------------------------------------------------------------------------------------------------------------------------------------------------------------------------------------|
| Q9UGM6 | WARS2                          | Tryptophan--tRNA ligase, mitochondrial (EC 6.1.1.2) ((Mt)TrpRS) (Tryptophanyl-tRNA synthetase) (TrpRS)                                                                                                                     |
| Q9UGY1 | NOL12                          | Nucleolar protein 12                                                                                                                                                                                                       |
| Q9UH17 | APOBEC3B                       | DNA dC->dU-editing enzyme APOBEC-3B (A3B) (EC 3.5.4.-) (Phorbolin-1-related protein) (Phorbolin-2/3)                                                                                                                       |
| Q9UHB9 | SRP68                          | Signal recognition particle subunit SRP68 (SRP68) (Signal recognition particle 68 kDa protein)                                                                                                                             |
| Q9UHC7 | MKRN1 RNF61                    | E3 ubiquitin-protein ligase makorin-1 (EC 6.3.2.-) (RING finger protein 61)                                                                                                                                                |
| Q9UHI6 | DDX20 DP103 GEMIN3             | Probable ATP-dependent RNA helicase DDX20 (EC 3.6.4.13) (Component of gems 3) (DEAD box protein 20) (DEAD box protein DP 103) (Gemin-3)                                                                                    |
| Q9UHK0 | NUFIP1                         | Nuclear fragile X mental retardation-interacting protein 1 (Nuclear FMRP-interacting protein 1)                                                                                                                            |
| Q9UHL0 | DDX25 GRTH                     | ATP-dependent RNA helicase DDX25 (EC 3.6.4.13) (DEAD box protein 25) (Gonadotropin-regulated testicular RNA helicase)                                                                                                      |
| Q9UHX1 | PUF60 FIR ROBPI SIAHBP1        | Poly(U)-binding-splicing factor PUF60 (60 kDa poly(U)-binding-splicing factor) (FUSE-binding protein-interacting repressor) (FBP-interacting repressor) (Ro-binding protein 1) (RoBP1) (Siah-binding protein 1) (Siah-BP1) |
| Q9UI10 | EIF2B4 EIF2BD                  | Translation initiation factor eIF-2B subunit delta (eIF-2B GDP-GTP exchange factor subunit delta)                                                                                                                          |
| Q9UI30 | TRMT112 AD-001 HSPC152 HSPC170 | Multifunctional methyltransferase subunit TRM112-like protein (tRNA methyltransferase 112 homolog)                                                                                                                         |
| Q9UI38 | PRSS50 CT20 TSP50              | Probable threonine protease PRSS50 (EC 3.4.25.-) (Cancer/testis antigen 20) (Serine protease 50) (Testis-specific protease-like protein 50)                                                                                |
| Q9UI43 | FTSJ2 FJH1 MRM2                | rRNA methyltransferase 2, mitochondrial (EC 2.1.1.-) (16S rRNA (uridine(1369)-2'-O)-methyltransferase) (16S rRNA [Um1369] 2'-O-methyltransferase) (Protein ftsJ homolog 2)                                                 |
| Q9UII5 | ZNF107 ZFD25 ZNF588            | Zinc finger protein 107 (Zinc finger protein 588) (Zinc finger protein ZFD25)                                                                                                                                              |
| Q9UIJ7 | AK3 AK3L1 AK6 AKL3L            | GTP:AMP phosphotransferase AK3, mitochondrial (EC 2.7.4.10) (Adenylate kinase 3) (AK 3) (Adenylate kinase 3 alpha-like 1)                                                                                                  |
| Q9UIK4 | DAPK2                          | Death-associated protein kinase 2 (DAP kinase 2) (EC 2.7.11.1) (DAP-kinase-related protein 1) (DRP-1)                                                                                                                      |
| Q9UIV1 | CNOT7 CAF1                     | CCR4-NOT transcription complex subunit 7 (EC 3.1.13.4) (BTG1-binding factor 1) (CCR4-associated factor 1) (CAF-1) (Caf1a)                                                                                                  |
| Q9UJA5 | TRMT6 KIAA1153 TRM6 CGI-09     | tRNA (adenine(58)-N(1))-methyltransferase non-catalytic subunit                                                                                                                                                            |

|        |                                     |                                                                                                                                                                         |
|--------|-------------------------------------|-------------------------------------------------------------------------------------------------------------------------------------------------------------------------|
|        |                                     | TRM6 (tRNA(m1A58)-methyltransferase subunit TRM6) (tRNA(m1A58)MTase subunit TRM6)                                                                                       |
| Q9UJJ7 | RPUSD1 C16orf40 RLUCL               | RNA pseudouridylate synthase domain-containing protein 1 (Ribosomal large subunit pseudouridine synthase C-like protein)                                                |
| Q9UJK0 | TSR3 C16orf42 UND313L               | Ribosome biogenesis protein TSR3 homolog                                                                                                                                |
| Q9UJL9 | ZFP69B ZNF643                       | Zinc finger protein ZFP69B (Zinc finger protein 643)                                                                                                                    |
| Q9UJN7 | ZNF391                              | Zinc finger protein 391                                                                                                                                                 |
| Q9UJQ4 | SALL4 ZNF797                        | Sal-like protein 4 (Zinc finger protein 797) (Zinc finger protein SALL4)                                                                                                |
| Q9UJU3 | ZNF112 ZFP112 ZNF228                | Zinc finger protein 112 (Zfp-112) (Zinc finger protein 228)                                                                                                             |
| Q9UJV9 | DDX41 ABS                           | Probable ATP-dependent RNA helicase DDX41 (EC 3.6.4.13) (DEAD box protein 41) (DEAD box protein abstrakt homolog)                                                       |
| Q9UJW7 | ZNF229                              | Zinc finger protein 229                                                                                                                                                 |
| Q9UJW8 | ZNF180                              | Zinc finger protein 180 (HHZ168)                                                                                                                                        |
| Q9UJX4 | ANAPC5 APC5                         | Anaphase-promoting complex subunit 5 (APC5) (Cyclosome subunit 5)                                                                                                       |
| Q9UK08 | GNG8 GNG9 GNGT9                     | Guanine nucleotide-binding protein G(I)/G(S)/G(O) subunit gamma-8 (Gamma-9)                                                                                             |
| Q9UK10 | ZNF225                              | Zinc finger protein 225                                                                                                                                                 |
| Q9UK13 | ZNF221                              | Zinc finger protein 221                                                                                                                                                 |
| Q9UK32 | RPS6KA6 RSK4                        | Ribosomal protein S6 kinase alpha-6 (S6K-alpha-6) (EC 2.7.11.1) (90 kDa ribosomal protein S6 kinase 6) (p90-RSK 6) (p90RSK6) (Ribosomal S6 kinase 4) (RSK-4) (pp90RSK4) |
| Q9UK33 | ZNF580                              | Zinc finger protein 580 (LDL-induced EC protein)                                                                                                                        |
| Q9UK45 | LSM7                                | U6 snRNA-associated Sm-like protein LSM7                                                                                                                                |
| Q9UK58 | CCNL1 BM-001 UNQ530/PRO1073         | Cyclin-L1 (Cyclin-L)                                                                                                                                                    |
| Q9UK59 | DBR1                                | Lariat debranching enzyme (EC 3.1.-.-)                                                                                                                                  |
| Q9UK73 | FEM1B F1AA KIAA0396                 | Protein fem-1 homolog B (FEM1b) (FEM1-beta) (Fem-1-like death receptor-binding protein alpha) (Fem-1-like in apoptotic pathway protein alpha) (F1A-alpha)               |
| Q9UKA9 | PTBP2 NPTB PTB PTBLP                | Polypyrimidine tract-binding protein 2 (Neural polypyrimidine tract-binding protein) (Neurally-enriched homolog of PTB) (PTB-like protein)                              |
| Q9UKB1 | FBXW11 BTRCP2 FBW1B FBXW1B KIAA0696 | F-box/WD repeat-containing protein 11 (F-box and WD repeats protein beta-TrCP2) (F-box/WD repeat-containing protein 1B) (Homologous to Slimb protein) (HOS)             |
| Q9UKD2 | MRT04 C1orf33 MRT4                  | mRNA turnover protein 4 homolog (Ribosome assembly factor MRT04)                                                                                                        |
| Q9UKE5 | TNIK KIAA0551                       | TRAF2 and NCK-interacting protein kinase (EC 2.7.11.1)                                                                                                                  |
| Q9UKF6 | CPSF3 CPSF73                        | Cleavage and polyadenylation specificity                                                                                                                                |

|        |                                           |                                                                                                                                                                                                                                                                              |
|--------|-------------------------------------------|------------------------------------------------------------------------------------------------------------------------------------------------------------------------------------------------------------------------------------------------------------------------------|
|        |                                           | factor subunit 3 (EC 3.1.27.-) (Cleavage and polyadenylation specificity factor 73 kDa subunit) (CPSF 73 kDa subunit) (mRNA 3'-end-processing endonuclease CPSF-73)                                                                                                          |
| Q9UKH3 | ERVK-9                                    | Endogenous retrovirus group K member 9 Env polypeptide (EnvK4 protein) (Envelope polypeptide) (HERV-K(C6) envelope protein) (HERV-K109 envelope protein) (HERV-K_6q14.1 provirus ancestral Env polypeptide) [Cleaved into: Surface protein (SU); Transmembrane protein (TM)] |
| Q9UKI3 | VPREB3 UNQ355/PRO619                      | Pre-B lymphocyte protein 3 (N27C7-2) (Protein VPreB3)                                                                                                                                                                                                                        |
| Q9UKI8 | TLK1 KIAA0137                             | Serine/threonine-protein kinase tousled-like 1 (EC 2.7.11.1) (PKU-beta) (Tousled-like kinase 1)                                                                                                                                                                              |
| Q9UKJ3 | GPATCH8 GPATC8 KIAA0553                   | G patch domain-containing protein 8                                                                                                                                                                                                                                          |
| Q9UKM9 | RALY HNRPCL2 P542                         | RNA-binding protein Raly (Autoantigen p542) (Heterogeneous nuclear ribonucleoprotein C-like 2) (hnRNP core protein C-like 2) (hnRNP associated with lethal yellow protein homolog)                                                                                           |
| Q9UKN8 | GTF3C4                                    | General transcription factor 3C polypeptide 4 (EC 2.3.1.48) (TF3C-delta) (Transcription factor IIIC 90 kDa subunit) (TFIIIC 90 kDa subunit) (TFIIIC90) (Transcription factor IIIC subunit delta)                                                                             |
| Q9UKQ9 | KLK9                                      | Kallikrein-9 (EC 3.4.21.-) (Kallikrein-like protein 3) (KLK-L3)                                                                                                                                                                                                              |
| Q9UKR0 | KLK12 KLKL5 UNQ669/PRO1303                | Kallikrein-12 (EC 3.4.21.-) (Kallikrein-like protein 5) (KLK-L5)                                                                                                                                                                                                             |
| Q9UKR3 | KLK13 KLKL4                               | Kallikrein-13 (EC 3.4.21.-) (Kallikrein-like protein 4) (KLK-L4)                                                                                                                                                                                                             |
| Q9UKT8 | FBXW2 FBW2 FWD2                           | F-box/WD repeat-containing protein 2 (F-box and WD-40 domain-containing protein 2) (Protein MD6)                                                                                                                                                                             |
| Q9UKV5 | AMFR RNF45                                | E3 ubiquitin-protein ligase AMFR (EC 6.3.2.-) (Autocrine motility factor receptor) (AMF receptor) (RING finger protein 45) (gp78)                                                                                                                                            |
| Q9UKV8 | AGO2 EIF2C2                               | Protein argonaute-2 (Argonaute2) (hAgo2) (EC 3.1.26.n2) (Argonaute RISC catalytic component 2) (Eukaryotic translation initiation factor 2C 2) (eIF-2C 2) (eIF2C 2) (PAZ Piwi domain protein) (PPD) (Protein slicer)                                                         |
| Q9UL18 | AGO1 EIF2C1                               | Protein argonaute-1 (Argonaute1) (hAgo1) (Argonaute RISC catalytic component 1) (Eukaryotic translation initiation factor 2C 1) (eIF-2C 1) (eIF2C 1) (Putative RNA-binding protein Q99)                                                                                      |
| Q9UL36 | ZNF236                                    | Zinc finger protein 236                                                                                                                                                                                                                                                      |
| Q9UL40 | ZNF346 JAZ                                | Zinc finger protein 346 (Just another zinc finger protein)                                                                                                                                                                                                                   |
| Q9UL52 | TMPRSS11E DESC1 TMPRSS11E2 UNQ742/PRO1461 | Transmembrane protease serine 11E (EC 3.4.21.-) (Serine protease DESC1) (Transmembrane protease serine 11E2)                                                                                                                                                                 |

|        |                            |                                                                                                                                   |
|--------|----------------------------|-----------------------------------------------------------------------------------------------------------------------------------|
|        |                            | [Cleaved into: Transmembrane protease serine 11E non-catalytic chain; Transmembrane protease serine 11E catalytic chain]          |
| Q9UL59 | ZNF214 BAZ1                | Zinc finger protein 214 (BWSCR2-associated zinc finger protein 1) (BAZ-1)                                                         |
| Q9ULC4 | MCTS1 MCT1                 | Malignant T-cell-amplified sequence 1 (MCT-1) (Multiple copies T-cell malignancies)                                               |
| Q9ULH0 | KIDINS220 ARMS KIAA1250    | Kinase D-interacting substrate of 220 kDa (Ankyrin repeat-rich membrane-spanning protein)                                         |
| Q9ULH4 | LRFN2 KIAA1246 SALM1       | Leucine-rich repeat and fibronectin type-III domain-containing protein 2 (Synaptic adhesion-like molecule 1)                      |
| Q9ULH7 | MKL2 KIAA1243 MRTFB        | MKL/myocardin-like protein 2 (Megakaryoblastic leukemia 2) (Myocardin-related transcription factor B) (MRTF-B)                    |
| Q9ULI1 | NWD2 KIAA1239              | NACHT and WD repeat domain-containing protein 2 (Leucine-rich repeat and WD repeat-containing protein KIAA1239)                   |
| Q9ULJ7 | ANKRD50 KIAA1223           | Ankyrin repeat domain-containing protein 50                                                                                       |
| Q9ULK6 | RNF150 KIAA1214            | RING finger protein 150                                                                                                           |
| Q9ULM2 | ZNF490 KIAA1198            | Zinc finger protein 490                                                                                                           |
| Q9ULT6 | ZNRF3 KIAA1133 RNF203      | E3 ubiquitin-protein ligase ZNRF3 (EC 6.3.2.-) (RING finger protein 203) (Zinc/RING finger protein 3)                             |
| Q9ULV4 | CORO1C CRN2 CRNN4          | Coronin-1C (Coronin-3) (hCRNN4)                                                                                                   |
| Q9UM11 | FZR1 CDH1 FYR FZR KIAA1242 | Fizzy-related protein homolog (Fzr) (CDC20-like protein 1) (Cdh1/Hct1 homolog) (hCDH1)                                            |
| Q9UM47 | NOTCH3                     | Neurogenic locus notch homolog protein 3 (Notch 3) [Cleaved into: Notch 3 extracellular truncation; Notch 3 intracellular domain] |
| Q9UMR2 | DDX19B DBP5 DDX19 TDBP     | ATP-dependent RNA helicase DDX19B (EC 3.6.4.13) (DEAD box RNA helicase DEAD5) (DEAD box protein 19B)                              |
| Q9UMS4 | PRPF19 NMP200 PRP19 SNEV   | Pre-mRNA-processing factor 19 (EC 6.3.2.-) (Nuclear matrix protein 200) (PRP19/PSO4 homolog) (hPso4) (Senescence evasion factor)  |
| Q9UMY1 | NOL7 C6orf90 NOP27         | Nucleolar protein 7 (Nucleolar protein of 27 kDa)                                                                                 |
| Q9UN86 | G3BP2 KIAA0660             | Ras GTPase-activating protein-binding protein 2 (G3BP-2) (GAP SH3 domain-binding protein 2)                                       |
| Q9UNI1 | CELA1 ELA1                 | Chymotrypsin-like elastase family member 1 (EC 3.4.21.36) (Elastase-1) (Pancreatic elastase 1)                                    |
| Q9UNP9 | PPIE CYP33                 | Peptidyl-prolyl cis-trans isomerase E (PPIase E) (EC 5.2.1.8) (Cyclophilin E) (Cyclophilin-33) (Rotamase E)                       |
| Q9UNQ2 | DIMT1 DIMT1L HUSSY-05      | Probable dimethyladenosine transferase (EC 2.1.1.183) (DIM1 dimethyladenosine transferase 1 homolog) (DIM1                        |



|        |                                  |                                                                                                                                                                                                                                          |
|--------|----------------------------------|------------------------------------------------------------------------------------------------------------------------------------------------------------------------------------------------------------------------------------------|
|        |                                  | dimethyladenosine transferase 1-like)<br>(Probable 18S rRNA (adenine(1779)-N(6)/adenine(1780)-N(6))-dimethyltransferase) (Probable 18S rRNA dimethylase) (Probable S-adenosylmethionine-6-N',N'-adenosyl(rRNA) dimethyltransferase)      |
| Q9UNW9 | NOVA2 ANOVA NOVA3                | RNA-binding protein Nova-2 (Astrocytic NOVA1-like RNA-binding protein) (Neuro-oncological ventral antigen 2)                                                                                                                             |
| Q9UNX3 | RPL26L1 RPL26P1                  | 60S ribosomal protein L26-like 1                                                                                                                                                                                                         |
| Q9UNX4 | WDR3                             | WD repeat-containing protein 3                                                                                                                                                                                                           |
| Q9UPP1 | PHF8 KIAA1111 ZNF422             | Histone lysine demethylase PHF8 (EC 1.14.11.27) (PHD finger protein 8)                                                                                                                                                                   |
| Q9UPR3 | SMG5 EST1B KIAA1089              | Protein SMG5 (EST1-like protein B) (LPTS-RP1) (LPTS-interacting protein) (SMG-5 homolog) (hSMG-5)                                                                                                                                        |
| Q9UPR6 | ZFR2 KIAA1086                    | Zinc finger RNA-binding protein 2                                                                                                                                                                                                        |
| Q9UPY3 | DICER1 DICER HERNA KIAA0928      | Endoribonuclease Dicer (EC 3.1.26.3) (Helicase with RNase motif) (Helicase MOI)                                                                                                                                                          |
| Q9UPZ9 | ICK KIAA0936                     | Serine/threonine-protein kinase ICK (EC 2.7.11.22) (Intestinal cell kinase) (hICK) (Laryngeal cancer kinase 2) (LCK2) (MAK-related kinase) (MRK)                                                                                         |
| Q9UQ03 | CORO2B KIAA0925                  | Coronin-2B (Coronin-like protein C) (Clipin-C) (Protein FC96)                                                                                                                                                                            |
| Q9UQ07 | MOK RAGE RAGE1                   | MAPK/MAK/MRK overlapping kinase (EC 2.7.11.22) (MOK protein kinase) (Renal tumor antigen 1) (RAGE-1)                                                                                                                                     |
| Q9UQ88 | CDK11A CDC2L2 CDC2L3 PITSLREB    | Cyclin-dependent kinase 11A (EC 2.7.11.22) (Cell division cycle 2-like protein kinase 2) (Cell division protein kinase 11A) (Galactosyltransferase-associated protein kinase p58/GTA) (PITSLRE serine/threonine-protein kinase CDC2L2)   |
| Q9UQB9 | AURKC AIE2 AIK3 AIRK3 ARK3 STK13 | Aurora kinase C (EC 2.7.11.1) (Aurora 3) (Aurora/IPL1-related kinase 3) (ARK-3) (Aurora-related kinase 3) (Aurora/IPL1/Eg2 protein 2) (Serine/threonine-protein kinase 13) (Serine/threonine-protein kinase aurora-C)                    |
| Q9UQG0 | ERVK-11                          | Endogenous retrovirus group K member 11 Pol protein (HERV-K_3q27.2 provirus ancestral Pol protein) [Includes: Reverse transcriptase (RT) (EC 2.7.7.49); Ribonuclease H (RNase H) (EC 3.1.26.4); Integrase (IN)]                          |
| Q9UQM7 | CAMK2A CAMKA KIAA0968            | Calcium/calmodulin-dependent protein kinase type II subunit alpha (CaM kinase II subunit alpha) (CaMK-II subunit alpha) (EC 2.7.11.17)                                                                                                   |
| Q9WJR5 | ERVK-19                          | Endogenous retrovirus group K member 19 Pol protein (HERV-K(C19) Pol protein) (HERV-K_19q11 provirus ancestral Pol protein) [Includes: Reverse transcriptase (RT) (EC 2.7.7.49); Ribonuclease H (RNase H) (EC 3.1.26.4); Integrase (IN)] |

|        |                                                |                                                                                                                                                                                                                    |
|--------|------------------------------------------------|--------------------------------------------------------------------------------------------------------------------------------------------------------------------------------------------------------------------|
| Q9Y225 | RNF24                                          | RING finger protein 24                                                                                                                                                                                             |
| Q9Y235 | APOBEC2                                        | C->U-editing enzyme APOBEC-2 (EC 3.5.4.36) (mRNA(cytosine(6666)) deaminase 2)                                                                                                                                      |
| Q9Y243 | AKT3 PKBG                                      | RAC-gamma serine/threonine-protein kinase (EC 2.7.11.1) (Protein kinase Akt-3) (Protein kinase B gamma) (PKB gamma) (RAC-PK-gamma) (STK-2)                                                                         |
| Q9Y252 | RNF6 SPG2                                      | E3 ubiquitin-protein ligase RNF6 (EC 6.3.2.-)                                                                                                                                                                      |
| Q9Y262 | EIF3L EIF3EIP EIF3S6IP HSPC021 HSPC025 MSTP005 | Eukaryotic translation initiation factor 3 subunit L (eIF3L) (Eukaryotic translation initiation factor 3 subunit 6-interacting protein) (Eukaryotic translation initiation factor 3 subunit E-interacting protein) |
| Q9Y263 | PLAA PLAP                                      | Phospholipase A-2-activating protein (PLA2P) (PLAP)                                                                                                                                                                |
| Q9Y283 | INVS INV NPHP2                                 | Inversin (Inversion of embryo turning homolog) (Nephrocystin-2)                                                                                                                                                    |
| Q9Y291 | MRPS33 CGI-139 PTD003                          | 28S ribosomal protein S33, mitochondrial (MRP-S33) (S33mt)                                                                                                                                                         |
| Q9Y295 | DRG1 NEDD3                                     | Developmentally-regulated GTP-binding protein 1 (DRG-1) (Neural precursor cell expressed developmentally down-regulated protein 3) (NEDD-3)                                                                        |
| Q9Y297 | BTRC BTRCP FBW1A FBXW1A                        | F-box/WD repeat-containing protein 1A (E3RSIkappaB) (Epididymis tissue protein Li 2a) (F-box and WD repeats protein beta-TrCP) (pIkappaBalpha-E3 receptor subunit)                                                 |
| Q9Y2A4 | ZNF443                                         | Zinc finger protein 443 (Krueppel-type zinc finger protein ZK1)                                                                                                                                                    |
| Q9Y2C9 | TLR6                                           | Toll-like receptor 6 (CD antigen CD286)                                                                                                                                                                            |
| Q9Y2G4 | ANKRD6 KIAA0957                                | Ankyrin repeat domain-containing protein 6 (Diversin)                                                                                                                                                              |
| Q9Y2G7 | ZFP30 KIAA0961 ZNF745                          | Zinc finger protein 30 homolog (Zfp-30) (Zinc finger protein 745)                                                                                                                                                  |
| Q9Y2H1 | STK38L KIAA0965 NDR2                           | Serine/threonine-protein kinase 38-like (EC 2.7.11.1) (NDR2 protein kinase) (Nuclear Dbf2-related kinase 2)                                                                                                        |
| Q9Y2H9 | MAST1 KIAA0973 SAST                            | Microtubule-associated serine/threonine-protein kinase 1 (EC 2.7.11.1) (Syntrophin-associated serine/threonine-protein kinase)                                                                                     |
| Q9Y2I8 | WDR37 KIAA0982                                 | WD repeat-containing protein 37                                                                                                                                                                                    |
| Q9Y2K2 | SIK3 KIAA0999 QSK L19                          | Serine/threonine-protein kinase SIK3 (EC 2.7.11.1) (Salt-inducible kinase 3) (SIK-3) (Serine/threonine-protein kinase QSK)                                                                                         |
| Q9Y2L1 | DIS3 KIAA1008 RRP44                            | Exosome complex exonuclease RRP44 (EC 3.1.13.-) (EC 3.1.26.-) (Protein DIS3 homolog) (Ribosomal RNA-processing protein 44)                                                                                         |
| Q9Y2P0 | ZNF835                                         | Zinc finger protein 835                                                                                                                                                                                            |
| Q9Y2P7 | ZNF256 BMZF3                                   | Zinc finger protein 256 (Bone marrow zinc finger 3) (BMZF-3)                                                                                                                                                       |
| Q9Y2P8 | RCL1 RNAC RPC2 RPCL1 RTC2 HSPC338              | RNA 3'-terminal phosphate cyclase-like protein                                                                                                                                                                     |
| Q9Y2Q1 | ZNF257 BMZF4                                   | Zinc finger protein 257 (Bone marrow zinc finger 4) (BMZF-4)                                                                                                                                                       |
| Q9Y2Q9 | MRPS28 MRPS35 HSPC007                          | 28S ribosomal protein S28, mitochondrial                                                                                                                                                                           |

|        |                             |                                                                                                                                                                                                          |
|--------|-----------------------------|----------------------------------------------------------------------------------------------------------------------------------------------------------------------------------------------------------|
|        |                             | (MRP-S28) (S28mt) (28S ribosomal protein S35, mitochondrial) (MRP-S35) (S35mt)                                                                                                                           |
| Q9Y2R4 | DDX52 ROK1 HUSSY-19         | Probable ATP-dependent RNA helicase DDX52 (EC 3.6.4.13) (ATP-dependent RNA helicase ROK1-like) (DEAD box protein 52)                                                                                     |
| Q9Y2R5 | MRPS17 RPMS17 HSPC011       | 28S ribosomal protein S17, mitochondrial (MRP-S17) (S17mt)                                                                                                                                               |
| Q9Y2R9 | MRPS7                       | 28S ribosomal protein S7, mitochondrial (MRP-S7) (S7mt) (bMRP-27a) (bMRP27a)                                                                                                                             |
| Q9Y2S0 | POLR1D                      | DNA-directed RNA polymerases I and III subunit RPAC2 (RNA polymerases I and III subunit AC2) (AC19) (DNA-directed RNA polymerase I subunit D) (RNA polymerase I 16 kDa subunit) (RPA16) (RPC16) (hRPA19) |
| Q9Y2T7 | YBX2 CSDA3 MSY2             | Y-box-binding protein 2 (Contrin) (DNA-binding protein C) (Dbpc) (Germ cell-specific Y-box-binding protein) (MSY2 homolog)                                                                               |
| Q9Y2U5 | MAP3K2 MAPKKK2 MEKK2        | Mitogen-activated protein kinase kinase kinase 2 (EC 2.7.11.25) (MAPK/ERK kinase kinase 2) (MEK kinase 2) (MEKK 2)                                                                                       |
| Q9Y2V2 | CARHSP1                     | Calcium-regulated heat stable protein 1 (Calcium-regulated heat-stable protein of 24 kDa) (CRHSP-24)                                                                                                     |
| Q9Y2W1 | THRAP3 TRAP150              | Thyroid hormone receptor-associated protein 3 (Thyroid hormone receptor-associated protein complex 150 kDa component) (Trap150)                                                                          |
| Q9Y2W6 | TDRKH TDRD2                 | Tudor and KH domain-containing protein (Tudor domain-containing protein 2)                                                                                                                               |
| Q9Y2X3 | NOP58 NOL5 NOP5 HSPC120     | Nucleolar protein 58 (Nucleolar protein 5)                                                                                                                                                               |
| Q9Y2Z2 | MTO1 CGI-02                 | Protein MTO1 homolog, mitochondrial                                                                                                                                                                      |
| Q9Y2Z4 | YARS2 CGI-04                | Tyrosine--tRNA ligase, mitochondrial (EC 6.1.1.1) (Tyrosyl-tRNA synthetase) (TyrRS)                                                                                                                      |
| Q9Y312 | AAR2 C20orf4 CGI-23 PRO0225 | Protein AAR2 homolog (AAR2 splicing factor homolog)                                                                                                                                                      |
| Q9Y324 | FCF1 C14orf111 CGI-35       | rRNA-processing protein FCF1 homolog                                                                                                                                                                     |
| Q9Y333 | LSM2 C6orf28 G7B            | U6 snRNA-associated Sm-like protein LSm2 (Protein G7b) (Small nuclear ribonuclear protein D homolog) (snRNP core Sm-like protein Sm-x5)                                                                  |
| Q9Y337 | KLK5 SCTE UNQ570/PRO1132    | Kallikrein-5 (EC 3.4.21.-) (Kallikrein-like protein 2) (KLK-L2) (Stratum corneum tryptic enzyme)                                                                                                         |
| Q9Y383 | LUC7L2 CGI-59 CGI-74        | Putative RNA-binding protein Luc7-like 2                                                                                                                                                                 |
| Q9Y388 | RBMX2 CGI-79                | RNA-binding motif protein, X-linked 2                                                                                                                                                                    |
| Q9Y399 | MRPS2 CGI-91                | 28S ribosomal protein S2, mitochondrial (MRP-S2) (S2mt)                                                                                                                                                  |
| Q9Y3A2 | UTP11L CGI-94 HDCMB12P      | Probable U3 small nucleolar RNA-associated protein 11 (U3 snoRNA-associated protein 11) (UTP11-like protein)                                                                                             |
| Q9Y3A4 | RRP7A CGI-96                | Ribosomal RNA-processing protein 7 homolog A (Gastric cancer antigen Zg14)                                                                                                                               |

|        |                                                  |                                                                                                                                                                                             |
|--------|--------------------------------------------------|---------------------------------------------------------------------------------------------------------------------------------------------------------------------------------------------|
| Q9Y3A5 | SBDS CGI-97                                      | Ribosome maturation protein SBDS (Shwachman-Bodian-Diamond syndrome protein)                                                                                                                |
| Q9Y3B2 | EXOSC1 CSL4 CGI-108                              | Exosome complex component CSL4 (Exosome component 1)                                                                                                                                        |
| Q9Y3B4 | SF3B6 SAP14 SF3B14 SF3B14A CGI-110 HSPC175 HT006 | Splicing factor 3B subunit 6 (Pre-mRNA branch site protein p14) (SF3b 14 kDa subunit) (SF3B14a) (Spliceosome-associated protein, 14-kDa) (Splicing factor 3b, subunit 6, 14kDa)             |
| Q9Y3B7 | MRPL11 CGI-113                                   | 39S ribosomal protein L11, mitochondrial (L11mt) (MRP-L11)                                                                                                                                  |
| Q9Y3B8 | REXO2 SFN SMFN CGI-114                           | Oligoribonuclease, mitochondrial (EC 3.1.-.-) (RNA exonuclease 2 homolog) (Small fragment nuclease)                                                                                         |
| Q9Y3C5 | RNF11 CGI-123                                    | RING finger protein 11                                                                                                                                                                      |
| Q9Y3C7 | MED31 SOH1 CGI-125                               | Mediator of RNA polymerase II transcription subunit 31 (Mediator complex subunit 31) (Mediator complex subunit SOH1) (hSOH1)                                                                |
| Q9Y3D3 | MRPS16 RPMS16 CGI-132                            | 28S ribosomal protein S16, mitochondrial (MRP-S16) (S16mt)                                                                                                                                  |
| Q9Y3D5 | MRPS18C CGI-134                                  | 28S ribosomal protein S18c, mitochondrial (MRP-S18-c) (Mrps18-c) (S18mt-c) (28S ribosomal protein S18-1, mitochondrial) (MRP-S18-1)                                                         |
| Q9Y3D9 | MRPS23 CGI-138 HSPC329                           | 28S ribosomal protein S23, mitochondrial (MRP-S23) (S23mt)                                                                                                                                  |
| Q9Y3E5 | PTRH2 BIT1 PTH2 CGI-147                          | Peptidyl-tRNA hydrolase 2, mitochondrial (PTH 2) (EC 3.1.1.29) (Bcl-2 inhibitor of transcription 1)                                                                                         |
| Q9Y3F4 | STRAP MAWD UNRIP                                 | Serine-threonine kinase receptor-associated protein (MAP activator with WD repeats) (UNR-interacting protein) (WD-40 repeat protein PT-WD)                                                  |
| Q9Y3I0 | RTCB C22orf28 HSPC117                            | tRNA-splicing ligase RtcB homolog (EC 6.5.1.3)                                                                                                                                              |
| Q9Y3M9 | ZNF337                                           | Zinc finger protein 337                                                                                                                                                                     |
| Q9Y3S1 | WNK2 KIAA1760 PRKWNK2 SDCCAG43 P/OKcl.13         | Serine/threonine-protein kinase WNK2 (EC 2.7.11.1) (Antigen NY-CO-43) (Protein kinase lysine-deficient 2) (Protein kinase with no lysine 2) (Serologically defined colon cancer antigen 43) |
| Q9Y450 | HBS1L HBS1 KIAA1038                              | HBS1-like protein (ERFS)                                                                                                                                                                    |
| Q9Y462 | ZNF711 CMPX1 ZNF6                                | Zinc finger protein 711 (Zinc finger protein 6)                                                                                                                                             |
| Q9Y463 | DYRK1B MIRK                                      | Dual specificity tyrosine-phosphorylation-regulated kinase 1B (EC 2.7.12.1) (Minibrain-related kinase) (Mirk protein kinase)                                                                |
| Q9Y467 | SALL2 KIAA0360 SAL2 ZNF795                       | Sal-like protein 2 (Zinc finger protein 795) (Zinc finger protein SALL2) (Zinc finger protein Spalt-2) (Sal-2) (hSal2)                                                                      |
| Q9Y4C1 | KDM3A JHDM2A JMJD1 JMJD1A KIAA0742 TSGA          | Lysine-specific demethylase 3A (EC 1.14.11.-) (JmjC domain-containing histone demethylation protein 2A) (Jumonji domain-containing protein 1A)                                              |
| Q9Y4C4 | MFHAS1 MASL1                                     | Malignant fibrous histiocytoma-amplified                                                                                                                                                    |

|        |                              |                                                                                                                                                                                  |
|--------|------------------------------|----------------------------------------------------------------------------------------------------------------------------------------------------------------------------------|
|        |                              | sequence 1 (Malignant fibrous histiocytoma-amplified sequence with leucine-rich tandem repeats 1)                                                                                |
| Q9Y4C8 | RBM19 KIAA0682               | Probable RNA-binding protein 19 (RNA-binding motif protein 19)                                                                                                                   |
| Q9Y4E6 | WDR7 KIAA0541 TRAG           | WD repeat-containing protein 7 (Rabconnectin-3 beta) (TGF-beta resistance-associated protein TRAG)                                                                               |
| Q9Y4F3 | KIAA0430 LKAP MARF1          | Meiosis arrest female protein 1 (Limkain-b1)                                                                                                                                     |
| Q9Y4K4 | MAP4K5                       | Mitogen-activated protein kinase kinase kinase 5 (EC 2.7.11.1) (Kinase homologous to SPS1/STE20) (KHS) (MAPK/ERK kinase kinase kinase 5) (MEK kinase kinase 5) (MEKKK 5)         |
| Q9Y4L5 | RNF115 ZNF364                | E3 ubiquitin-protein ligase RNF115 (EC 6.3.2.-) (RING finger protein 115) (Rabring 7) (Zinc finger protein 364)                                                                  |
| Q9Y4P3 | TBL2 WBSCR13 UNQ563/PRO1125  | Transducin beta-like protein 2 (WS beta-transducin repeats protein) (WS-betaTRP) (Williams-Beuren syndrome chromosomal region 13 protein)                                        |
| Q9Y4Y9 | LSM5                         | U6 snRNA-associated Sm-like protein LSm5                                                                                                                                         |
| Q9Y4Z0 | LSM4                         | U6 snRNA-associated Sm-like protein LSm4 (Glycine-rich protein) (GRP)                                                                                                            |
| Q9Y534 | CSDC2 PIPPIN                 | Cold shock domain-containing protein C2 (RNA-binding protein PIPPin)                                                                                                             |
| Q9Y535 | POLR3H KIAA1665 RPC8         | DNA-directed RNA polymerase III subunit RPC8 (RNA polymerase III subunit C8) (DNA-directed RNA polymerase III subunit H) (RNA polymerase III subunit 22.9 kDa subunit) (RPC22.9) |
| Q9Y572 | RIPK3 RIP3                   | Receptor-interacting serine/threonine-protein kinase 3 (EC 2.7.11.1) (RIP-like protein kinase 3) (Receptor-interacting protein 3) (RIP-3)                                        |
| Q9Y575 | ASB3                         | Ankyrin repeat and SOCS box protein 3 (ASB-3)                                                                                                                                    |
| Q9Y577 | TRIM17 RBCC RNF16 TERF       | E3 ubiquitin-protein ligase TRIM17 (EC 6.3.2.-) (RING finger protein 16) (Testis RING finger protein) (Tripartite motif-containing protein 17)                                   |
| Q9Y580 | RBM7                         | RNA-binding protein 7 (RNA-binding motif protein 7)                                                                                                                              |
| Q9Y5A9 | YTHDF2 HGRG8                 | YTH domain-containing family protein 2 (CLL-associated antigen KW-14) (High-glucose-regulated protein 8) (Renal carcinoma antigen NY-REN-2)                                      |
| Q9Y5J1 | UTP18 WDR50 CDABP0061 CGI-48 | U3 small nucleolar RNA-associated protein 18 homolog (WD repeat-containing protein 50)                                                                                           |
| Q9Y5K2 | KLK4 EMSP1 PRSS17 PSTS       | Kallikrein-4 (EC 3.4.21.-) (Enamel matrix serine proteinase 1) (Kallikrein-like protein 1) (KLK-L1) (Protease) (Serine protease 17)                                              |
| Q9Y5Q5 | CORIN CRN TMRSS10            | Atrial natriuretic peptide-converting enzyme (EC 3.4.21.-) (Corin) (Heart-specific serine proteinase ATC2) (Pro-                                                                 |

|        |                                            |                                                                                                                                                                                                                                                                                                                                                                                                                                                  |
|--------|--------------------------------------------|--------------------------------------------------------------------------------------------------------------------------------------------------------------------------------------------------------------------------------------------------------------------------------------------------------------------------------------------------------------------------------------------------------------------------------------------------|
|        |                                            | ANP-converting enzyme) (Transmembrane protease serine 10) [Cleaved into: Atrial natriuretic peptide-converting enzyme, N-terminal propeptide; Atrial natriuretic peptide-converting enzyme, activated protease fragment; Atrial natriuretic peptide-converting enzyme, 180 kDa soluble fragment; Atrial natriuretic peptide-converting enzyme, 160 kDa soluble fragment; Atrial natriuretic peptide-converting enzyme, 100 kDa soluble fragment] |
| Q9Y5Q8 | GTF3C5 CDABP0017                           | General transcription factor 3C polypeptide 5 (TF3C-epsilon) (Transcription factor IIIC 63 kDa subunit) (TFIIIC 63 kDa subunit) (TFIIIC63) (Transcription factor IIIC subunit epsilon)                                                                                                                                                                                                                                                           |
| Q9Y5S2 | CDC42BPB KIAA1124                          | Serine/threonine-protein kinase MRCK beta (EC 2.7.11.1) (CDC42-binding protein kinase beta) (CDC42BP-beta) (DMPK-like beta) (Myotonic dystrophy kinase-related CDC42-binding kinase beta) (MRCK beta) (Myotonic dystrophy protein kinase-like beta)                                                                                                                                                                                              |
| Q9Y5S9 | RBM8A RBM8 HSPC114 MDS014                  | RNA-binding protein 8A (Binder of OVCA1-1) (BOV-1) (RNA-binding motif protein 8A) (RNA-binding protein Y14) (Ribonucleoprotein RBM8A)                                                                                                                                                                                                                                                                                                            |
| Q9Y5Y6 | ST14 PRSS14 SNC19 TADG15                   | Suppressor of tumorigenicity 14 protein (EC 3.4.21.109) (Matriptase) (Membrane-type serine protease 1) (MT-SP1) (Prostamin) (Serine protease 14) (Serine protease TADG-15) (Tumor-associated differentially-expressed gene 15 protein)                                                                                                                                                                                                           |
| Q9Y606 | PUS1 PP8985                                | tRNA pseudouridine synthase A, mitochondrial (EC 5.4.99.12) (tRNA pseudouridine(38-40) synthase) (tRNA pseudouridylylase synthase I) (tRNA-uridine isomerase I)                                                                                                                                                                                                                                                                                  |
| Q9Y676 | MRPS18B C6orf14 HSPC183 PTD017             | 28S ribosomal protein S18b, mitochondrial (MRP-S18-b) (Mrps18-b) (S18mt-b) (28S ribosomal protein S18-2, mitochondrial) (MRP-S18-2)                                                                                                                                                                                                                                                                                                              |
| Q9Y6E0 | STK24 MST3 STK3                            | Serine/threonine-protein kinase 24 (EC 2.7.11.1) (Mammalian STE20-like protein kinase 3) (MST-3) (STE20-like kinase MST3) [Cleaved into: Serine/threonine-protein kinase 24 36 kDa subunit (Mammalian STE20-like protein kinase 3 N-terminal) (MST3/N); Serine/threonine-protein kinase 24 12 kDa subunit (Mammalian STE20-like protein kinase 3 C-terminal) (MST3/C)]                                                                           |
| Q9Y6G3 | MRPL42 MRPL31 MRPS32 RPML31 HSPC204 PTD007 | 39S ribosomal protein L42, mitochondrial (L42mt) (MRP-L42) (28S ribosomal protein S32, mitochondrial) (MRP-S32) (S32mt) (39S ribosomal protein L31, mitochondrial) (L31mt) (MRP-L31)                                                                                                                                                                                                                                                             |
| Q9Y6I0 | ERVK-6 ERVK6                               | Endogenous retrovirus group K member 6 Pro protein (HERV-K(C7) Pro protein)                                                                                                                                                                                                                                                                                                                                                                      |

|        |                                    |                                                                                                                                                                                              |
|--------|------------------------------------|----------------------------------------------------------------------------------------------------------------------------------------------------------------------------------------------|
|        |                                    | (HERV-K(HML-2.HOM) Pro protein)<br>(HERV-K108 Pro protein) (HERV-K_7p22.1 provirus ancestral Pro protein)<br>(EC 3.4.23.50) (Protease) (Proteinase) (PR)                                     |
| Q9Y6I7 | WSB1 SWIP1                         | WD repeat and SOCS box-containing protein 1 (WSB-1) (SOCS box-containing WD protein SWiP-1)                                                                                                  |
| Q9Y6K5 | OAS3 P/OKcl.4                      | 2'-5'-oligoadenylate synthase 3 ((2-5')oligo(A) synthase 3) (2-5A synthase 3) (EC 2.7.7.84) (p100 OAS) (p100OAS)                                                                             |
| Q9Y6M0 | PRSS21 ESP1 TEST1 UNQ266/PRO303    | Testisin (EC 3.4.21.-) (Eosinophil serine protease 1) (ESP-1) (Serine protease 21)                                                                                                           |
| Q9Y6M1 | IGF2BP2 IMP2 VICKZ2                | Insulin-like growth factor 2 mRNA-binding protein 2 (IGF2 mRNA-binding protein 2) (IMP-2) (Hepatocellular carcinoma autoantigen p62) (IGF-II mRNA-binding protein 2) (VICKZ family member 2) |
| Q9Y6Q3 | ZFP37                              | Zinc finger protein 37 homolog (Zfp-37)                                                                                                                                                      |
| Q9Y6R4 | MAP3K4 KIAA0213 MAPKKK4 MEKK4 MTK1 | Mitogen-activated protein kinase kinase kinase 4 (EC 2.7.11.25) (MAP three kinase 1) (MAPK/ERK kinase kinase 4) (MEK kinase 4) (MEKK 4)                                                      |
| Q9Y6R6 | ZNF780B ZNF779                     | Zinc finger protein 780B (Zinc finger protein 779)                                                                                                                                           |
| Q9Y6S9 | RPS6KL1                            | Ribosomal protein S6 kinase-like 1 (EC 2.7.11.1)                                                                                                                                             |
| Q9Y6U7 | RNF215                             | RING finger protein 215                                                                                                                                                                      |
| Q9Y6V7 | DDX49                              | Probable ATP-dependent RNA helicase DDX49 (EC 3.6.4.13) (DEAD box protein 49)                                                                                                                |
| Q9Y6X6 | MYO16 KIAA0865 MYO16B NYAP3        | Unconventional myosin-XVI (Neuronal tyrosine-phosphorylated phosphoinositide-3-kinase adapter 3) (Unconventional myosin-16)                                                                  |
