# Supplementary material for: Genome-wide survey of putative RNA-binding proteins encoded in the human proteome
Source: Royal Society of Chemistry journal article supplement (doi:10.1039/c5mb00638d), 2015-11-30
Supplement: c5mb00638d1.zip [file c5mb00638d1.zip]

**Supplementary Table 5:** EC numbers of the putative RNA-binding proteins in the human genome.

| Entry  | EC number(s) |
|--------|--------------|
| A1KZ92 | 1.11.1.7     |
| Q92626 | 1.11.1.7     |
| B2RXH2 | 1.14.11.-    |
| O14607 | 1.14.11.-    |
| O15054 | 1.14.11.-    |
| O15550 | 1.14.11.-    |
| O75151 | 1.14.11.-    |
| O75164 | 1.14.11.-    |
| O94953 | 1.14.11.-    |
| P29375 | 1.14.11.-    |
| P41229 | 1.14.11.-    |
| Q15652 | 1.14.11.-    |
| Q6B0I6 | 1.14.11.-    |
| Q6NYC1 | 1.14.11.-    |
| Q6ZMT4 | 1.14.11.-    |
| Q7LBC6 | 1.14.11.-    |
| Q9BY66 | 1.14.11.-    |
| Q9C0B1 | 1.14.11.-    |
| Q9H3R0 | 1.14.11.-    |
| Q9UGL1 | 1.14.11.-    |
| Q9Y4C1 | 1.14.11.-    |
| Q9UPP1 | 1.14.11.27   |
| O95620 | 1.3.1.-      |
| Q6P1R4 | 1.3.1.-      |
| Q96G46 | 1.3.1.-      |
| Q9NX74 | 1.3.1.-      |
| O75891 | 1.5.1.6      |
| Q3SY69 | 1.5.1.6      |
| A6NHQ2 | 2.1.1.-      |
| P22087 | 2.1.1.-      |
| P57071 | 2.1.1.-      |
| Q13395 | 2.1.1.-      |
| Q5T280 | 2.1.1.-      |
| Q6IN84 | 2.1.1.-      |
| Q6PF06 | 2.1.1.-      |
| Q7L0Y3 | 2.1.1.-      |
| Q7L2J0 | 2.1.1.-      |
| Q7Z2T5 | 2.1.1.-      |
| Q7Z4G4 | 2.1.1.-      |
| Q7Z5W3 | 2.1.1.-      |
| Q8IY81 | 2.1.1.-      |

|        |                   |
|--------|-------------------|
| Q8IZ69 | 2.1.1.-           |
| Q8N3J2 | 2.1.1.-           |
| Q8TBZ6 | 2.1.1.-           |
| Q8WVM0 | 2.1.1.-           |
| Q92979 | 2.1.1.-           |
| Q96RS0 | 2.1.1.-           |
| Q9H4Q4 | 2.1.1.-           |
| Q9H5Q4 | 2.1.1.-           |
| Q9HC36 | 2.1.1.-           |
| Q9NQV6 | 2.1.1.-           |
| Q9NQX1 | 2.1.1.-           |
| Q9UI43 | 2.1.1.-           |
| Q96KQ7 | 2.1.1.-; 2.1.1.43 |
| Q9H9B1 | 2.1.1.-; 2.1.1.43 |
| Q9UNQ2 | 2.1.1.183         |
| Q9UET6 | 2.1.1.205         |
| Q9NXH9 | 2.1.1.216         |
| Q96FX7 | 2.1.1.220         |
| Q9BVS5 | 2.1.1.220         |
| Q9NUP7 | 2.1.1.225         |
| Q32P41 | 2.1.1.228         |
| Q6IPR3 | 2.1.1.282         |
| Q8IYT2 | 2.1.1.296         |
| Q96GJ1 | 2.1.1.35          |
| Q9BYW2 | 2.1.1.43          |
| Q9NQV7 | 2.1.1.43          |
| O43148 | 2.1.1.56          |
| Q8N1G2 | 2.1.1.57          |
| Q86U44 | 2.1.1.62          |
| Q9HCE5 | 2.1.1.62          |
| Q5T8I9 | 2.1.1.n8          |
| Q96DP5 | 2.1.2.9           |
| O60318 | 2.3.1.-           |
| Q9H0A0 | 2.3.1.-           |
| Q8IUH4 | 2.3.1.225         |
| Q8IUH5 | 2.3.1.225         |
| Q09472 | 2.3.1.48          |
| Q92793 | 2.3.1.48          |
| Q92993 | 2.3.1.48          |
| Q9H7Z6 | 2.3.1.48          |
| Q9UKN8 | 2.3.1.48          |
| O95260 | 2.3.2.8           |
| Q9BXR0 | 2.4.2.29          |
| Q9H974 | 2.4.2.29          |

|        |           |
|--------|-----------|
| O95271 | 2.4.2.30  |
| Q9H2K2 | 2.4.2.30  |
| Q9H3H1 | 2.5.1.75  |
| Q8NI60 | 2.7.-.-   |
| Q5SY16 | 2.7.1.-   |
| Q9H8X2 | 2.7.1.158 |
| Q86TN4 | 2.7.1.160 |
| Q8IV42 | 2.7.1.164 |
| Q92989 | 2.7.1.78  |
| P0C1S8 | 2.7.10.2  |
| Q3MIX3 | 2.7.11.-  |
| Q7Z695 | 2.7.11.-  |
| Q86TW2 | 2.7.11.-  |
| Q96D53 | 2.7.11.-  |
| O00141 | 2.7.11.1  |
| O00506 | 2.7.11.1  |
| O14578 | 2.7.11.1  |
| O14730 | 2.7.11.1  |
| O14757 | 2.7.11.1  |
| O14936 | 2.7.11.1  |
| O14965 | 2.7.11.1  |
| O15021 | 2.7.11.1  |
| O15075 | 2.7.11.1  |
| O15530 | 2.7.11.1  |
| O43293 | 2.7.11.1  |
| O43930 | 2.7.11.1  |
| O60229 | 2.7.11.1  |
| O60285 | 2.7.11.1  |
| O60307 | 2.7.11.1  |
| O75116 | 2.7.11.1  |
| O75385 | 2.7.11.1  |
| O75582 | 2.7.11.1  |
| O75676 | 2.7.11.1  |
| O75914 | 2.7.11.1  |
| O75962 | 2.7.11.1  |
| O94768 | 2.7.11.1  |
| O94804 | 2.7.11.1  |
| O95747 | 2.7.11.1  |
| O95819 | 2.7.11.1  |
| O95835 | 2.7.11.1  |
| O96013 | 2.7.11.1  |
| O96017 | 2.7.11.1  |
| P04049 | 2.7.11.1  |
| P11309 | 2.7.11.1  |

|        |          |
|--------|----------|
| P11801 | 2.7.11.1 |
| P15056 | 2.7.11.1 |
| P19784 | 2.7.11.1 |
| P23443 | 2.7.11.1 |
| P27448 | 2.7.11.1 |
| P31749 | 2.7.11.1 |
| P31751 | 2.7.11.1 |
| P51812 | 2.7.11.1 |
| P51817 | 2.7.11.1 |
| P51955 | 2.7.11.1 |
| P51956 | 2.7.11.1 |
| P51957 | 2.7.11.1 |
| P53355 | 2.7.11.1 |
| P57058 | 2.7.11.1 |
| P57059 | 2.7.11.1 |
| P57078 | 2.7.11.1 |
| P68400 | 2.7.11.1 |
| Q00535 | 2.7.11.1 |
| Q09013 | 2.7.11.1 |
| Q12851 | 2.7.11.1 |
| Q13043 | 2.7.11.1 |
| Q13153 | 2.7.11.1 |
| Q13177 | 2.7.11.1 |
| Q13188 | 2.7.11.1 |
| Q13464 | 2.7.11.1 |
| Q13546 | 2.7.11.1 |
| Q15208 | 2.7.11.1 |
| Q15349 | 2.7.11.1 |
| Q15418 | 2.7.11.1 |
| Q15772 | 2.7.11.1 |
| Q15831 | 2.7.11.1 |
| Q16644 | 2.7.11.1 |
| Q52WX2 | 2.7.11.1 |
| Q56UN5 | 2.7.11.1 |
| Q59H18 | 2.7.11.1 |
| Q5S007 | 2.7.11.1 |
| Q5VST9 | 2.7.11.1 |
| Q5VT25 | 2.7.11.1 |
| Q6A1A2 | 2.7.11.1 |
| Q6DT37 | 2.7.11.1 |
| Q6P0Q8 | 2.7.11.1 |
| Q6P3R8 | 2.7.11.1 |
| Q6PHR2 | 2.7.11.1 |
| Q6SA08 | 2.7.11.1 |

|        |          |
|--------|----------|
| Q6ZWH5 | 2.7.11.1 |
| Q7Z2Y5 | 2.7.11.1 |
| Q86SG6 | 2.7.11.1 |
| Q86UE8 | 2.7.11.1 |
| Q86UX6 | 2.7.11.1 |
| Q86V86 | 2.7.11.1 |
| Q86YV6 | 2.7.11.1 |
| Q86Z02 | 2.7.11.1 |
| Q8IVH8 | 2.7.11.1 |
| Q8IW41 | 2.7.11.1 |
| Q8IY84 | 2.7.11.1 |
| Q8IYT8 | 2.7.11.1 |
| Q8N4C8 | 2.7.11.1 |
| Q8N568 | 2.7.11.1 |
| Q8NEV1 | 2.7.11.1 |
| Q8NEV4 | 2.7.11.1 |
| Q8NFD2 | 2.7.11.1 |
| Q8NG66 | 2.7.11.1 |
| Q8TD19 | 2.7.11.1 |
| Q8TDX7 | 2.7.11.1 |
| Q8WU08 | 2.7.11.1 |
| Q8WXR4 | 2.7.11.1 |
| Q92918 | 2.7.11.1 |
| Q96BR1 | 2.7.11.1 |
| Q96C45 | 2.7.11.1 |
| Q96GD4 | 2.7.11.1 |
| Q96GX5 | 2.7.11.1 |
| Q96J92 | 2.7.11.1 |
| Q96L34 | 2.7.11.1 |
| Q96LW2 | 2.7.11.1 |
| Q96PF2 | 2.7.11.1 |
| Q96PN8 | 2.7.11.1 |
| Q96PY6 | 2.7.11.1 |
| Q96QS6 | 2.7.11.1 |
| Q96S38 | 2.7.11.1 |
| Q99640 | 2.7.11.1 |
| Q9BQI3 | 2.7.11.1 |
| Q9BRS2 | 2.7.11.1 |
| Q9BVS4 | 2.7.11.1 |
| Q9BXA7 | 2.7.11.1 |
| Q9BYP7 | 2.7.11.1 |
| Q9BYT3 | 2.7.11.1 |
| Q9C098 | 2.7.11.1 |
| Q9H093 | 2.7.11.1 |

|        |                                           |
|--------|-------------------------------------------|
| Q9H0K1 | 2.7.11.1                                  |
| Q9H2X6 | 2.7.11.1                                  |
| Q9H4A3 | 2.7.11.1                                  |
| Q9HBH9 | 2.7.11.1                                  |
| Q9HBY8 | 2.7.11.1                                  |
| Q9HC98 | 2.7.11.1                                  |
| Q9NQU5 | 2.7.11.1                                  |
| Q9NRH2 | 2.7.11.1                                  |
| Q9NRM7 | 2.7.11.1                                  |
| Q9NRP7 | 2.7.11.1                                  |
| Q9NWZ3 | 2.7.11.1                                  |
| Q9NY57 | 2.7.11.1                                  |
| Q9P1W9 | 2.7.11.1                                  |
| Q9P286 | 2.7.11.1                                  |
| Q9P289 | 2.7.11.1                                  |
| Q9P2K8 | 2.7.11.1                                  |
| Q9UBS0 | 2.7.11.1                                  |
| Q9UEE5 | 2.7.11.1                                  |
| Q9UEW8 | 2.7.11.1                                  |
| Q9UIK4 | 2.7.11.1                                  |
| Q9UK32 | 2.7.11.1                                  |
| Q9UKE5 | 2.7.11.1                                  |
| Q9UKI8 | 2.7.11.1                                  |
| Q9UQB9 | 2.7.11.1                                  |
| Q9Y243 | 2.7.11.1                                  |
| Q9Y2H1 | 2.7.11.1                                  |
| Q9Y2H9 | 2.7.11.1                                  |
| Q9Y2K2 | 2.7.11.1                                  |
| Q9Y3S1 | 2.7.11.1                                  |
| Q9Y4K4 | 2.7.11.1                                  |
| Q9Y572 | 2.7.11.1                                  |
| Q9Y5S2 | 2.7.11.1                                  |
| Q9Y6E0 | 2.7.11.1                                  |
| Q9Y6S9 | 2.7.11.1                                  |
| P19525 | 2.7.11.1; 2.7.10.2                        |
| Q14680 | 2.7.11.1; 2.7.10.2                        |
| Q7KZI7 | 2.7.11.1; 2.7.11.26                       |
| Q8IWQ3 | 2.7.11.1; 2.7.11.26                       |
| Q8TDC3 | 2.7.11.1; 2.7.11.26                       |
| Q9P0L2 | 2.7.11.1; 2.7.11.26                       |
| P54646 | 2.7.11.1; 2.7.11.27; 2.7.11.31            |
| Q13131 | 2.7.11.1; 2.7.11.27; 2.7.11.31; 2.7.11.26 |
| O75460 | 2.7.11.1; 3.1.26.-                        |
| Q76MJ5 | 2.7.11.1; 3.1.26.-                        |

|        |                      |
|--------|----------------------|
| O14920 | 2.7.11.10            |
| O15111 | 2.7.11.10            |
| P17612 | 2.7.11.11            |
| P22612 | 2.7.11.11            |
| P22694 | 2.7.11.11            |
| Q13237 | 2.7.11.12            |
| Q13976 | 2.7.11.12            |
| O94806 | 2.7.11.13            |
| P05129 | 2.7.11.13            |
| P05771 | 2.7.11.13            |
| P17252 | 2.7.11.13            |
| P24723 | 2.7.11.13            |
| P41743 | 2.7.11.13            |
| Q02156 | 2.7.11.13            |
| Q04759 | 2.7.11.13            |
| Q05513 | 2.7.11.13            |
| Q15139 | 2.7.11.13            |
| Q16512 | 2.7.11.13            |
| Q16513 | 2.7.11.13            |
| Q6P5Z2 | 2.7.11.13            |
| Q9BZL6 | 2.7.11.13            |
| Q05655 | 2.7.11.13; 2.7.10.2  |
| Q15835 | 2.7.11.14            |
| Q8WTQ7 | 2.7.11.14; 2.7.11.16 |
| P25098 | 2.7.11.15            |
| P35626 | 2.7.11.15            |
| P32298 | 2.7.11.16            |
| P34947 | 2.7.11.16            |
| P43250 | 2.7.11.16            |
| Q13554 | 2.7.11.17            |
| Q13555 | 2.7.11.17            |
| Q13557 | 2.7.11.17            |
| Q14012 | 2.7.11.17            |
| Q16566 | 2.7.11.17            |
| Q6P2M8 | 2.7.11.17            |
| Q8IU85 | 2.7.11.17            |
| Q8N5S9 | 2.7.11.17            |
| Q96NX5 | 2.7.11.17            |
| Q96RR4 | 2.7.11.17            |
| Q9UQM7 | 2.7.11.17            |
| Q15746 | 2.7.11.18            |
| Q32MK0 | 2.7.11.18            |
| Q9H1R3 | 2.7.11.18            |
| P15735 | 2.7.11.19            |

|        |                                |
|--------|--------------------------------|
| Q16816 | 2.7.11.19; 2.7.11.1; 2.7.11.26 |
| O00444 | 2.7.11.21                      |
| P53350 | 2.7.11.21                      |
| Q9H4B4 | 2.7.11.21                      |
| Q9NYY3 | 2.7.11.21                      |
| O76039 | 2.7.11.22                      |
| O94921 | 2.7.11.22                      |
| P11802 | 2.7.11.22                      |
| P20794 | 2.7.11.22                      |
| P21127 | 2.7.11.22                      |
| P24941 | 2.7.11.22                      |
| Q00526 | 2.7.11.22                      |
| Q00532 | 2.7.11.22                      |
| Q00534 | 2.7.11.22                      |
| Q00536 | 2.7.11.22                      |
| Q00537 | 2.7.11.22                      |
| Q07002 | 2.7.11.22                      |
| Q15131 | 2.7.11.22                      |
| Q5MAI5 | 2.7.11.22                      |
| Q8IVW4 | 2.7.11.22                      |
| Q8IZL9 | 2.7.11.22                      |
| Q92772 | 2.7.11.22                      |
| Q96Q40 | 2.7.11.22                      |
| Q9BWU1 | 2.7.11.22                      |
| Q9UPZ9 | 2.7.11.22                      |
| Q9UQ07 | 2.7.11.22                      |
| Q9UQ88 | 2.7.11.22                      |
| P06493 | 2.7.11.22; 2.7.11.23           |
| P49336 | 2.7.11.22; 2.7.11.23           |
| P50613 | 2.7.11.22; 2.7.11.23           |
| P50750 | 2.7.11.22; 2.7.11.23           |
| Q14004 | 2.7.11.22; 2.7.11.23           |
| Q9NYV4 | 2.7.11.22; 2.7.11.23           |
| O15264 | 2.7.11.24                      |
| P27361 | 2.7.11.24                      |
| P28482 | 2.7.11.24                      |
| P45984 | 2.7.11.24                      |
| P53778 | 2.7.11.24                      |
| Q13164 | 2.7.11.24                      |
| Q15759 | 2.7.11.24                      |
| Q16539 | 2.7.11.24                      |
| Q8TD08 | 2.7.11.24                      |
| Q9UBE8 | 2.7.11.24                      |
| O43283 | 2.7.11.25                      |



|        |                     |
|--------|---------------------|
| O43318 | 2.7.11.25           |
| O95382 | 2.7.11.25           |
| P80192 | 2.7.11.25           |
| Q02779 | 2.7.11.25           |
| Q13233 | 2.7.11.25           |
| Q16584 | 2.7.11.25           |
| Q6ZN16 | 2.7.11.25           |
| Q99558 | 2.7.11.25           |
| Q99683 | 2.7.11.25           |
| Q99759 | 2.7.11.25           |
| Q9Y2U5 | 2.7.11.25           |
| Q9Y6R4 | 2.7.11.25           |
| P49840 | 2.7.11.26; 2.7.11.1 |
| P49841 | 2.7.11.26; 2.7.11.1 |
| P36896 | 2.7.11.30           |
| O43781 | 2.7.12.1            |
| Q13627 | 2.7.12.1            |
| Q15569 | 2.7.12.1            |
| Q92630 | 2.7.12.1            |
| Q9NR20 | 2.7.12.1            |
| Q9Y463 | 2.7.12.1            |
| O14733 | 2.7.12.2            |
| P36507 | 2.7.12.2            |
| P45985 | 2.7.12.2            |
| P46734 | 2.7.12.2            |
| P52564 | 2.7.12.2            |
| Q02750 | 2.7.12.2            |
| Q13163 | 2.7.12.2            |
| Q9UII7 | 2.7.4.10            |
| P27144 | 2.7.4.10; 2.7.4.6   |
| P54819 | 2.7.4.3             |
| P49642 | 2.7.7.-             |
| P49643 | 2.7.7.-             |
| P51003 | 2.7.7.19            |
| Q5XG87 | 2.7.7.19            |
| Q6PIY7 | 2.7.7.19            |
| Q8NDF8 | 2.7.7.19            |
| Q9BWT3 | 2.7.7.19            |
| Q9NRJ5 | 2.7.7.19            |
| O14746 | 2.7.7.49            |
| O00370 | 2.7.7.49; 3.1.21.-  |
| P10266 | 2.7.7.49; 3.1.26.4  |
| P63132 | 2.7.7.49; 3.1.26.4  |
| P63133 | 2.7.7.49; 3.1.26.4  |

|        |                    |
|--------|--------------------|
| P63135 | 2.7.7.49; 3.1.26.4 |
| P63136 | 2.7.7.49; 3.1.26.4 |
| Q9BXR3 | 2.7.7.49; 3.1.26.4 |
| Q9QC07 | 2.7.7.49; 3.1.26.4 |
| Q9UQG0 | 2.7.7.49; 3.1.26.4 |
| Q9WJR5 | 2.7.7.49; 3.1.26.4 |
| Q5TAX3 | 2.7.7.52           |
| Q5VYS8 | 2.7.7.52           |
| O00411 | 2.7.7.6            |
| O14802 | 2.7.7.6            |
| O95602 | 2.7.7.6            |
| P30876 | 2.7.7.6            |
| Q9H9Y6 | 2.7.7.6            |
| Q9NW08 | 2.7.7.6            |
| P24928 | 2.7.7.6; 2.7.7.48  |
| O75417 | 2.7.7.7            |
| Q96Q11 | 2.7.7.72           |
| Q9NWX6 | 2.7.7.79           |
| Q8TCS8 | 2.7.7.8            |
| P00973 | 2.7.7.84           |
| P29728 | 2.7.7.84           |
| Q9Y6K5 | 2.7.7.84           |
| O75648 | 2.8.1.-            |
| Q9HD40 | 2.9.1.2            |
| P49773 | 3.-.-.-            |
| Q7Z2E3 | 3.-.-.-            |
| Q8IZD4 | 3.-.-.-            |
| Q9BX68 | 3.-.-.-            |
| Q9NPI6 | 3.-.-.-            |
| Q9NQE9 | 3.-.-.-            |
| A8K979 | 3.1.-.-            |
| O43414 | 3.1.-.-            |
| P21128 | 3.1.-.-            |
| P52758 | 3.1.-.-            |
| Q86US8 | 3.1.-.-            |
| Q8IV48 | 3.1.-.-            |
| Q8N9H8 | 3.1.-.-            |
| Q8TEA8 | 3.1.-.-            |
| Q8WTP8 | 3.1.-.-            |
| Q96FN9 | 3.1.-.-            |
| Q96IC2 | 3.1.-.-            |
| Q9BRX2 | 3.1.-.-            |
| Q9GZR2 | 3.1.-.-            |
| Q9H790 | 3.1.-.-            |

|        |                    |
|--------|--------------------|
| Q9H9L3 | 3.1.-.-            |
| Q9UK59 | 3.1.-.-            |
| Q9Y3B8 | 3.1.-.-            |
| Q14197 | 3.1.1.29           |
| Q6GMV3 | 3.1.1.29           |
| Q86Y79 | 3.1.1.29           |
| Q9Y3E5 | 3.1.1.29           |
| O60733 | 3.1.1.4            |
| Q01780 | 3.1.13.-           |
| Q8IYB7 | 3.1.13.-           |
| Q8IZH2 | 3.1.13.-           |
| Q8TF46 | 3.1.13.-           |
| Q9H0D6 | 3.1.13.-           |
| Q9Y2L1 | 3.1.13.-; 3.1.26.- |
| O77932 | 3.1.13.-; 3.6.1.-  |
| Q96AZ6 | 3.1.13.1           |
| O95453 | 3.1.13.4           |
| Q504Q3 | 3.1.13.4           |
| Q9UFF9 | 3.1.13.4           |
| Q9UIV1 | 3.1.13.4           |
| Q05823 | 3.1.26.-           |
| Q9H9J2 | 3.1.26.-           |
| Q9BQ52 | 3.1.26.11          |
| Q9H777 | 3.1.26.11          |
| Q9NRR4 | 3.1.26.3           |
| Q9UPY3 | 3.1.26.3           |
| O60930 | 3.1.26.4           |
| O75792 | 3.1.26.4           |
| O75818 | 3.1.26.5           |
| P78346 | 3.1.26.5           |
| Q969H6 | 3.1.26.5           |
| Q99575 | 3.1.26.5           |
| Q9H633 | 3.1.26.5           |
| Q9UKV8 | 3.1.26.n2          |
| Q5TA45 | 3.1.27.-           |
| Q9UKF6 | 3.1.27.-           |
| O60346 | 3.1.3.16           |
| Q8IXW5 | 3.1.3.16           |
| Q9NP77 | 3.1.3.16           |
| O60942 | 3.1.3.33; 2.7.7.50 |
| O95551 | 3.1.4.-            |
| P09543 | 3.1.4.37           |
| O75951 | 3.2.1.17           |
| P61626 | 3.2.1.17           |

|        |           |
|--------|-----------|
| Q6UWQ5 | 3.2.1.17  |
| Q7Z4W2 | 3.2.1.17  |
| Q96QH8 | 3.2.1.17  |
| P53582 | 3.4.11.18 |
| A1L453 | 3.4.21.-  |
| A6NIE9 | 3.4.21.-  |
| A8MTI9 | 3.4.21.-  |
| E5RG02 | 3.4.21.-  |
| E7EML9 | 3.4.21.-  |
| O15393 | 3.4.21.-  |
| O43240 | 3.4.21.-  |
| O60235 | 3.4.21.-  |
| P08519 | 3.4.21.-  |
| P0CW18 | 3.4.21.-  |
| P40313 | 3.4.21.-  |
| P48740 | 3.4.21.-  |
| P49863 | 3.4.21.-  |
| P51124 | 3.4.21.-  |
| P56730 | 3.4.21.-  |
| P57727 | 3.4.21.-  |
| Q04756 | 3.4.21.-  |
| Q14520 | 3.4.21.-  |
| Q16651 | 3.4.21.-  |
| Q2L4Q9 | 3.4.21.-  |
| Q5K4E3 | 3.4.21.-  |
| Q6UWB4 | 3.4.21.-  |
| Q6ZMR5 | 3.4.21.-  |
| Q6ZWK6 | 3.4.21.-  |
| Q7RTY3 | 3.4.21.-  |
| Q7RTY5 | 3.4.21.-  |
| Q7RTY7 | 3.4.21.-  |
| Q7RTY8 | 3.4.21.-  |
| Q7RTY9 | 3.4.21.-  |
| Q7RTZ1 | 3.4.21.-  |
| Q7Z410 | 3.4.21.-  |
| Q7Z5A4 | 3.4.21.-  |
| Q86T26 | 3.4.21.-  |
| Q86WS5 | 3.4.21.-  |
| Q8IU80 | 3.4.21.-  |
| Q8NF86 | 3.4.21.-  |
| Q92876 | 3.4.21.-  |
| Q9BQR3 | 3.4.21.-  |
| Q9BYE2 | 3.4.21.-  |
| Q9GZN4 | 3.4.21.-  |

|        |            |
|--------|------------|
| Q9H2R5 | 3.4.21.-   |
| Q9H3S3 | 3.4.21.-   |
| Q9NRR2 | 3.4.21.-   |
| Q9NRS4 | 3.4.21.-   |
| Q9NZP8 | 3.4.21.-   |
| Q9P0G3 | 3.4.21.-   |
| Q9UBX7 | 3.4.21.-   |
| Q9UKQ9 | 3.4.21.-   |
| Q9UKR0 | 3.4.21.-   |
| Q9UKR3 | 3.4.21.-   |
| Q9UL52 | 3.4.21.-   |
| Q9Y337 | 3.4.21.-   |
| Q9Y5K2 | 3.4.21.-   |
| Q9Y5Q5 | 3.4.21.-   |
| Q9Y6M0 | 3.4.21.-   |
| P17538 | 3.4.21.1   |
| Q6GPI1 | 3.4.21.1   |
| P10323 | 3.4.21.10  |
| O00187 | 3.4.21.104 |
| P05981 | 3.4.21.106 |
| Q9Y5Y6 | 3.4.21.109 |
| P49862 | 3.4.21.117 |
| O60259 | 3.4.21.118 |
| Q99895 | 3.4.21.2   |
| P08709 | 3.4.21.21  |
| P00740 | 3.4.21.22  |
| P03951 | 3.4.21.27  |
| P03952 | 3.4.21.34  |
| P06870 | 3.4.21.35  |
| P20151 | 3.4.21.35  |
| Q9UNI1 | 3.4.21.36  |
| P00748 | 3.4.21.38  |
| P07477 | 3.4.21.4   |
| P07478 | 3.4.21.4   |
| P35030 | 3.4.21.4   |
| Q8IYP2 | 3.4.21.4   |
| Q8NHM4 | 3.4.21.4   |
| P00736 | 3.4.21.41  |
| P09871 | 3.4.21.42  |
| P06681 | 3.4.21.43  |
| P05156 | 3.4.21.45  |
| P00746 | 3.4.21.46  |
| P00751 | 3.4.21.47  |
| P00734 | 3.4.21.5   |

|        |                                        |
|--------|----------------------------------------|
| P20231 | 3.4.21.59                              |
| Q15661 | 3.4.21.59                              |
| Q9BZJ3 | 3.4.21.59                              |
| P00742 | 3.4.21.6                               |
| P00750 | 3.4.21.68                              |
| P04070 | 3.4.21.69                              |
| P00747 | 3.4.21.7                               |
| P08861 | 3.4.21.70                              |
| P09093 | 3.4.21.70                              |
| P08217 | 3.4.21.71                              |
| P08218 | 3.4.21.71                              |
| P00749 | 3.4.21.73                              |
| P07288 | 3.4.21.77                              |
| P12544 | 3.4.21.78                              |
| P98073 | 3.4.21.9                               |
| P10265 | 3.4.23.50                              |
| P63119 | 3.4.23.50                              |
| P63120 | 3.4.23.50                              |
| P63121 | 3.4.23.50                              |
| P63122 | 3.4.23.50                              |
| P63123 | 3.4.23.50                              |
| P63124 | 3.4.23.50                              |
| P63125 | 3.4.23.50                              |
| P63127 | 3.4.23.50                              |
| P63129 | 3.4.23.50                              |
| P63131 | 3.4.23.50                              |
| Q9Y6I0 | 3.4.23.50                              |
| P63128 | 3.4.23.50; 2.7.7.49; 2.7.7.7; 3.1.26.4 |
| Q9UI38 | 3.4.25.-                               |
| Q9NS39 | 3.5.-.-                                |
| P31941 | 3.5.4.-                                |
| Q6NTF7 | 3.5.4.-                                |
| Q7Z6V5 | 3.5.4.-                                |
| Q8IUX4 | 3.5.4.-                                |
| Q8WW27 | 3.5.4.-                                |
| Q96AK3 | 3.5.4.-                                |
| Q9HC16 | 3.5.4.-                                |
| Q9NRW3 | 3.5.4.-                                |
| Q9UH17 | 3.5.4.-                                |
| Q9BUB4 | 3.5.4.34                               |
| P41238 | 3.5.4.36                               |
| Q9Y235 | 3.5.4.36                               |
| P55265 | 3.5.4.37                               |
| P78563 | 3.5.4.37                               |

|        |                    |
|--------|--------------------|
| Q9GZX7 | 3.5.4.38           |
| Q9BSD7 | 3.6.1.15           |
| Q96C86 | 3.6.1.59           |
| Q8IU60 | 3.6.1.62           |
| P08183 | 3.6.3.44           |
| P21439 | 3.6.3.44           |
| P13569 | 3.6.3.49           |
| Q15477 | 3.6.4.-            |
| Q92900 | 3.6.4.-            |
| Q9BYK8 | 3.6.4.-            |
| A2PYH4 | 3.6.4.12           |
| O94761 | 3.6.4.12           |
| O94762 | 3.6.4.12           |
| P46063 | 3.6.4.12           |
| P54132 | 3.6.4.12           |
| Q8N3C0 | 3.6.4.12           |
| Q8TDG4 | 3.6.4.12           |
| Q8TE96 | 3.6.4.12           |
| Q14191 | 3.6.4.12; 3.1.-.-  |
| Q13283 | 3.6.4.12; 3.6.4.13 |
| Q9H2U1 | 3.6.4.12; 3.6.4.13 |
| O00148 | 3.6.4.13           |
| O00571 | 3.6.4.13           |
| O15523 | 3.6.4.13           |
| O43143 | 3.6.4.13           |
| O60231 | 3.6.4.13           |
| O75643 | 3.6.4.13           |
| O95786 | 3.6.4.13           |
| P17844 | 3.6.4.13           |
| P26196 | 3.6.4.13           |
| P38919 | 3.6.4.13           |
| P42285 | 3.6.4.13           |
| P60842 | 3.6.4.13           |
| Q08211 | 3.6.4.13           |
| Q13206 | 3.6.4.13           |
| Q13838 | 3.6.4.13           |
| Q14147 | 3.6.4.13           |
| Q14240 | 3.6.4.13           |
| Q14562 | 3.6.4.13           |
| Q5H9U9 | 3.6.4.13           |
| Q5T1V6 | 3.6.4.13           |
| Q6P158 | 3.6.4.13           |
| Q7L014 | 3.6.4.13           |
| Q7L2E3 | 3.6.4.13           |

|        |          |
|--------|----------|
| Q7L7V1 | 3.6.4.13 |
| Q7Z478 | 3.6.4.13 |
| Q86TM3 | 3.6.4.13 |
| Q86XP3 | 3.6.4.13 |
| Q8IX18 | 3.6.4.13 |
| Q8IY21 | 3.6.4.13 |
| Q8IY37 | 3.6.4.13 |
| Q8IYB8 | 3.6.4.13 |
| Q8IYD8 | 3.6.4.13 |
| Q8N8A6 | 3.6.4.13 |
| Q8NDG6 | 3.6.4.13 |
| Q8NHQ9 | 3.6.4.13 |
| Q8TDD1 | 3.6.4.13 |
| Q92499 | 3.6.4.13 |
| Q92620 | 3.6.4.13 |
| Q92841 | 3.6.4.13 |
| Q96C10 | 3.6.4.13 |
| Q96GQ7 | 3.6.4.13 |
| Q9BQ39 | 3.6.4.13 |
| Q9BUQ8 | 3.6.4.13 |
| Q9BXT6 | 3.6.4.13 |
| Q9BYX4 | 3.6.4.13 |
| Q9GZR7 | 3.6.4.13 |
| Q9H0S4 | 3.6.4.13 |
| Q9H5Z1 | 3.6.4.13 |
| Q9H6R0 | 3.6.4.13 |
| Q9H6S0 | 3.6.4.13 |
| Q9H8H2 | 3.6.4.13 |
| Q9NQI0 | 3.6.4.13 |
| Q9NR30 | 3.6.4.13 |
| Q9NUL7 | 3.6.4.13 |
| Q9NUU7 | 3.6.4.13 |
| Q9NVP1 | 3.6.4.13 |
| Q9NXZ2 | 3.6.4.13 |
| Q9NY93 | 3.6.4.13 |
| Q9UHI6 | 3.6.4.13 |
| Q9UHL0 | 3.6.4.13 |
| Q9UJV9 | 3.6.4.13 |
| Q9UMR2 | 3.6.4.13 |
| Q9Y2R4 | 3.6.4.13 |
| Q9Y6V7 | 3.6.4.13 |
| Q8N442 | 3.6.5.-  |
| Q6NUM6 | 4.1.3.44 |
| Q9NV66 | 4.1.3.44 |



|        |                    |
|--------|--------------------|
| P21399 | 4.2.1.3            |
| Q99798 | 4.2.1.3            |
| P23396 | 4.2.99.18          |
| Q8NCE0 | 4.6.1.16           |
| Q9BSV6 | 4.6.1.16           |
| Q8NCW5 | 5.1.99.6           |
| Q8WUA2 | 5.2.1.8            |
| Q96BP3 | 5.2.1.8            |
| Q9UNP9 | 5.2.1.8            |
| Q9BV20 | 5.3.1.23           |
| O60832 | 5.4.99.-           |
| O95900 | 5.4.99.-           |
| Q8N0Z8 | 5.4.99.-           |
| Q8WWH5 | 5.4.99.-           |
| Q96PZ0 | 5.4.99.-           |
| Q9H0K6 | 5.4.99.-           |
| Q9Y606 | 5.4.99.12          |
| Q9BZE2 | 5.4.99.45          |
| P54577 | 6.1.1.1            |
| Q9Y2Z4 | 6.1.1.1            |
| P56192 | 6.1.1.10           |
| Q96GW9 | 6.1.1.10           |
| P49591 | 6.1.1.11           |
| Q9NP81 | 6.1.1.11           |
| P14868 | 6.1.1.12           |
| Q6PI48 | 6.1.1.12           |
| P41250 | 6.1.1.14           |
| Q7L3T8 | 6.1.1.15           |
| P49589 | 6.1.1.16           |
| Q9HA77 | 6.1.1.16           |
| Q5JPH6 | 6.1.1.17           |
| P07814 | 6.1.1.17; 6.1.1.15 |
| P47897 | 6.1.1.18           |
| P54136 | 6.1.1.19           |
| Q5T160 | 6.1.1.19           |
| P23381 | 6.1.1.2            |
| Q9UGM6 | 6.1.1.2            |
| O95363 | 6.1.1.20           |
| Q9NSD9 | 6.1.1.20           |
| P12081 | 6.1.1.21           |
| P49590 | 6.1.1.21           |
| O43776 | 6.1.1.22           |
| Q96I59 | 6.1.1.22           |
| A2RTX5 | 6.1.1.3            |

|        |         |
|--------|---------|
| P26639 | 6.1.1.3 |
| Q9BW92 | 6.1.1.3 |
| Q15031 | 6.1.1.4 |
| Q9P2J5 | 6.1.1.4 |
| P41252 | 6.1.1.5 |
| Q9NSE4 | 6.1.1.5 |
| Q15046 | 6.1.1.6 |
| P49588 | 6.1.1.7 |
| Q5JTZ9 | 6.1.1.7 |
| P26640 | 6.1.1.9 |
| Q5ST30 | 6.1.1.9 |
| O43567 | 6.3.2.- |
| O95071 | 6.3.2.- |
| O95628 | 6.3.2.- |
| P19474 | 6.3.2.- |
| P78317 | 6.3.2.- |
| Q13064 | 6.3.2.- |
| Q13434 | 6.3.2.- |
| Q5U5Q3 | 6.3.2.- |
| Q66K89 | 6.3.2.- |
| Q68DV7 | 6.3.2.- |
| Q6Q0C0 | 6.3.2.- |
| Q6ZNA4 | 6.3.2.- |
| Q86TM6 | 6.3.2.- |
| Q86XS8 | 6.3.2.- |
| Q86YT6 | 6.3.2.- |
| Q8IYU2 | 6.3.2.- |
| Q8NC42 | 6.3.2.- |
| Q8NHY2 | 6.3.2.- |
| Q8TEB7 | 6.3.2.- |
| Q8WVZ7 | 6.3.2.- |
| Q96AX9 | 6.3.2.- |
| Q96F44 | 6.3.2.- |
| Q9BV68 | 6.3.2.- |
| Q9H000 | 6.3.2.- |
| Q9H0F5 | 6.3.2.- |
| Q9H6Y7 | 6.3.2.- |
| Q9HBD1 | 6.3.2.- |
| Q9HCM9 | 6.3.2.- |
| Q9NS91 | 6.3.2.- |
| Q9NVW2 | 6.3.2.- |
| Q9P0P0 | 6.3.2.- |
| Q9UHC7 | 6.3.2.- |
| Q9UKV5 | 6.3.2.- |

|        |                            |
|--------|----------------------------|
| Q9ULT6 | 6.3.2.-                    |
| Q9UMS4 | 6.3.2.-                    |
| Q9Y252 | 6.3.2.-                    |
| Q9Y4L5 | 6.3.2.-                    |
| Q9Y577 | 6.3.2.-                    |
| P22102 | 6.3.4.13; 6.3.3.1; 2.1.2.2 |
| O75879 | 6.3.5.-                    |
| Q9Y3I0 | 6.5.1.3                    |
| O00442 | 6.5.1.4                    |
