# Supplementary material for: Genome-wide survey of putative RNA-binding proteins encoded in the human proteome
Source: Royal Society of Chemistry journal article supplement (doi:10.1039/c5mb00638d), 2015-11-30
Supplement: c5mb00638d1.zip [file c5mb00638d1.zip]

**Supplementary Table 2:** Pfam domain architectures of the putative RNA-binding proteins in the human genome.

| Entry  | Pfam domain architecture                                                                                                                                                                                                                                                                                                                                                                                                                                                                                                 |
|--------|--------------------------------------------------------------------------------------------------------------------------------------------------------------------------------------------------------------------------------------------------------------------------------------------------------------------------------------------------------------------------------------------------------------------------------------------------------------------------------------------------------------------------|
| Q96PZ0 | (114)TruD(145)~(252)TruD(642)                                                                                                                                                                                                                                                                                                                                                                                                                                                                                            |
| P63133 | (76)RVT_1(245)~(252)RVT_thumb(316)~(462)RNase_H(588)~(592)Integrase_Zn(629)~(646)rve(755)                                                                                                                                                                                                                                                                                                                                                                                                                                |
| Q8N782 | (3)zf-H2C2_2(28)~(31)zf-H2C2_2(55)~(60)zf-H2C2_2(83)~(87)zf-H2C2_2(112)~(116)zf-H2C2_2(138)~(143)zf-H2C2_2(167)~(171)zf-H2C2_2(195)                                                                                                                                                                                                                                                                                                                                                                                      |
| Q9QC07 | (76)RVT_1(245)~(252)RVT_thumb(316)~(462)RNase_H(588)~(592)Integrase_Zn(629)~(662)rve(755)                                                                                                                                                                                                                                                                                                                                                                                                                                |
| Q9H9B1 | (744)Ank_2(834)~(838)Ank_2(903)~(910)Ank_2(982)~(1014)Pre-SET(1118)~(1137)SET(1243)                                                                                                                                                                                                                                                                                                                                                                                                                                      |
| P61573 | (19)HERV-K_REC(105)                                                                                                                                                                                                                                                                                                                                                                                                                                                                                                      |
| P17035 | (8)KRAB(48)~(230)zf-H2C2_2(253)~(258)zf-H2C2_2(282)~(289)zf-H2C2_2(310)~(299)zf-C2H2(318)~(342)zf-H2C2_2(365)~(370)zf-H2C2_2(394)~(397)zf-H2C2_2(422)~(426)zf-H2C2_2(449)~(439)zf-C2H2(461)~(454)zf-H2C2_2(476)~(481)zf-H2C2_2(505)~(510)zf-H2C2_2(534)~(551)zf-C2H2(573)~(566)zf-H2C2_2(589)~(593)zf-H2C2_2(617)~(623)zf-H2C2_2(645)~(649)zf-H2C2_2(673)~(677)zf-H2C2_2(701)                                                                                                                                            |
| Q5CZA5 | (13)KRAB(53)~(218)zf-H2C2_2(241)~(246)zf-H2C2_2(269)~(273)zf-H2C2_2(298)~(305)zf-H2C2_2(324)~(332)zf-H2C2_2(354)~(358)zf-H2C2_2(380)~(388)zf-H2C2_2(410)~(414)zf-H2C2_2(438)~(445)zf-H2C2_2(466)~(470)zf-H2C2_2(493)~(498)zf-H2C2_2(520)~(525)zf-H2C2_2(550)                                                                                                                                                                                                                                                             |
| O43318 | (37)Pkinase_Tyr(283)                                                                                                                                                                                                                                                                                                                                                                                                                                                                                                     |
| A6NJ16 | (26)V-set(117)                                                                                                                                                                                                                                                                                                                                                                                                                                                                                                           |
| Q9UNI1 | (19)Trypsin(251)                                                                                                                                                                                                                                                                                                                                                                                                                                                                                                         |
| Q8NHM4 | (24)Trypsin(239)                                                                                                                                                                                                                                                                                                                                                                                                                                                                                                         |
| P00746 | (26)Trypsin(248)                                                                                                                                                                                                                                                                                                                                                                                                                                                                                                         |
| Q9Y333 | (6)LSM(71)                                                                                                                                                                                                                                                                                                                                                                                                                                                                                                               |
| Q00341 | (106)KH_1(142)~(153)KH_1(211)~(225)KH_1(284)~(298)KH_1(356)~(368)KH_1(424)~(438)KH_1(496)~(512)KH_1(568)~(584)KH_1(643)~(656)KH_1(716)~(731)KH_1(789)~(804)KH_1(863)~(877)KH_1(966)~(974)KH_1(1032)~(1055)KH_1(1117)~(1133)KH_1(1190)                                                                                                                                                                                                                                                                                    |
| P05771 | (37)C1_1(87)~(102)C1_1(153)~(173)C2(277)~(344)Pkinase(599)                                                                                                                                                                                                                                                                                                                                                                                                                                                               |
| P05129 | (36)C1_1(87)~(101)C1_1(152)~(173)C2(277)~(353)Pkinase(599)                                                                                                                                                                                                                                                                                                                                                                                                                                                               |
| Q9BZJ3 | (38)Trypsin(239)                                                                                                                                                                                                                                                                                                                                                                                                                                                                                                         |
| Q7Z2Z2 | (18)GTP_EFTU(269)~(980)EFG_C(1064)                                                                                                                                                                                                                                                                                                                                                                                                                                                                                       |
| Q15365 | (15)KH_1(75)~(99)KH_1(162)~(281)KH_1(343)                                                                                                                                                                                                                                                                                                                                                                                                                                                                                |
| P41250 | (67)WHEP-TRS(109)~(615)HGTP_anticodon(708)                                                                                                                                                                                                                                                                                                                                                                                                                                                                               |
| Q9Y6V7 | (26)DEAD(195)~(234)Helicase_C(343)                                                                                                                                                                                                                                                                                                                                                                                                                                                                                       |
| P01769 | (12)V-set(120)                                                                                                                                                                                                                                                                                                                                                                                                                                                                                                           |
| O15015 | (9)zf-C2H2(31)~(48)zf-C2H2(70)~(75)zf-C2H2(97)~(239)zf-C2H2(261)~(280)zf-H2C2_2(303)~(374)zf-C2H2(396)~(401)zf-C2H2_4(424)~(465)zf-C2H2(487)~(492)zf-C2H2(514)~(575)zf-C2H2(597)~(617)zf-C2H2(639)~(644)zf-C2H2_jaz(664)~(821)zf-C2H2(840)~(848)zf-C2H2_4(870)~(1052)zf-C2H2(1074)~(1079)zf-C2H2_4(1101)~(1203)zf-C2H2(1225)~(1244)zf-H2C2_2(1267)~(1258)zf-C2H2(1280)~(1299)zf-C2H2(1321)~(1326)zf-C2H2(1348)~(1365)zf-C2H2(1386)~(1585)zf-C2H2(1607)~(1677)zf-C2H2(1699)~(1718)zf-H2C2_2(1743)~(1761)zf-C2H2_jaz(1781) |
| P49589 | (44)tRNA-synt_1e(452)                                                                                                                                                                                                                                                                                                                                                                                                                                                                                                    |
| Q9P255 | (128)zf-H2C2_2(150)~(155)zf-H2C2_2(179)~(183)zf-H2C2_2(207)~(211)zf-H2C2_2(235)~(239)zf-H2C2_2(263)~(268)zf-H2C2_2(291)~(296)zf-H2C2_2(319)~(323)zf-H2C2_2(348)~(337)zf-C2H2(359)~(379)zf-H2C2_2(402)~(408)zf-H2C2_2(431)~(436)zf-H2C2_2(459)~(463)zf-H2C2_2(488)                                                                                                                                                                                                                                                        |
| P01624 | (6)V-set(107)                                                                                                                                                                                                                                                                                                                                                                                                                                                                                                            |

|        |                                                                                                                                                                                                                                                                                                                                   |
|--------|-----------------------------------------------------------------------------------------------------------------------------------------------------------------------------------------------------------------------------------------------------------------------------------------------------------------------------------|
| P06316 | (24)V-set(129)                                                                                                                                                                                                                                                                                                                    |
| Q8NF99 | (46)SCAN(134)~(285)zf-C2H2(307)~(299)zf-H2C2_2(323)~(330)zf-H2C2_2(351)~(356)zf-H2C2_2(379)~(386)zf-H2C2_2(407)~(412)zf-H2C2_2(435)~(442)zf-H2C2_2(463)~(467)zf-H2C2_2(492)~(481)zf-C2H2(503)~(509)zf-C2H2(531)                                                                                                                   |
| Q6ZRY4 | (33)RRM_1(94)                                                                                                                                                                                                                                                                                                                     |
| Q9H1H1 | (7)zf-U11-48K(30)~(40)zf-U11-48K(63)                                                                                                                                                                                                                                                                                              |
| Q14586 | (4)KRAB(44)~(315)zf-H2C2_2(330)~(380)zf-C2H2(402)~(394)zf-H2C2_2(417)~(423)zf-H2C2_2(446)~(464)zf-C2H2(486)~(478)zf-H2C2_2(503)~(492)zf-C2H2(514)~(534)zf-H2C2_2(557)~(562)zf-H2C2_2(586)~(591)zf-H2C2_2(615)~(622)zf-H2C2_2(643)~(647)zf-H2C2_2(670)~(675)zf-H2C2_2(699)~(703)zf-H2C2_2(726)                                     |
| Q9GZM3 | (31)RNA_pol_L_2(102)                                                                                                                                                                                                                                                                                                              |
| Q96A72 | (7)Mago_nashi(148)                                                                                                                                                                                                                                                                                                                |
| Q8WUD4 | (11)cwf18(143)                                                                                                                                                                                                                                                                                                                    |
| Q13464 | (76)Pkinase(338)~(948)Rho_Binding(1014)                                                                                                                                                                                                                                                                                           |
| P03952 | (23)PAN_1(104)~(111)PAN_1(191)~(201)PAN_1(284)~(292)PAN_1(372)~(391)Trypsin(621)                                                                                                                                                                                                                                                  |
| Q9Y3D9 | (2)MRP-S23(129)                                                                                                                                                                                                                                                                                                                   |
| Q15024 | (32)RNase_PH(166)~(197)RNase_PH_C(261)                                                                                                                                                                                                                                                                                            |
| P22792 | (147)LRR_8(205)~(194)LRR_8(251)~(293)LRR_8(349)                                                                                                                                                                                                                                                                                   |
| P49458 | (4)SRP9-21(73)                                                                                                                                                                                                                                                                                                                    |
| Q8WUA8 | (62)LRR_8(120)~(207)LRR_8(265)~(272)LRR_8(308)                                                                                                                                                                                                                                                                                    |
| P61572 | (19)HERV-K_REC(105)                                                                                                                                                                                                                                                                                                               |
| Q16625 | (57)MARVEL(263)~(420)Occludin_ELL(518)                                                                                                                                                                                                                                                                                            |
| Q9UKD2 | (21)Ribosomal_L10(119)                                                                                                                                                                                                                                                                                                            |
| P51888 | (102)LRR_8(162)~(171)LRR_8(231)~(245)LRR_8(303)~(312)LRR_4(362)                                                                                                                                                                                                                                                                   |
| Q5S007 | (1012)LRR_8(1070)~(1107)LRR_4(1145)~(1173)LRR_8(1208)~(1246)LRR_8(1299)~(1336)Roc(1455)~(1545)COR(1740)~(1885)Pkinase(2129)                                                                                                                                                                                                       |
| Q15477 | (314)DEAD(460)~(763)rRNA_proc-arch(1045)~(1072)DSHCT(1240)                                                                                                                                                                                                                                                                        |
| Q494X3 | (6)KRAB(46)~(145)zf-H2C2_2(169)~(175)zf-H2C2_2(196)~(204)zf-H2C2_2(225)~(229)zf-H2C2_2(252)~(254)zf-H2C2_2(282)~(285)zf-H2C2_2(309)~(314)zf-H2C2_2(337)~(341)zf-H2C2_2(364)~(370)zf-H2C2_2(393)~(411)zf-C2H2(433)~(425)zf-H2C2_2(448)~(454)zf-H2C2_2(477)~(482)zf-H2C2_2(505)~(510)zf-H2C2_2(534)                                 |
| O75694 | (79)Nucleoporin_N(508)~(774)Nucleoporin_C(1178)                                                                                                                                                                                                                                                                                   |
| Q9NV72 | (74)KRAB(114)~(296)zf-H2C2_2(319)~(336)zf-C2H2(358)~(350)zf-H2C2_2(374)~(378)zf-H2C2_2(403)~(406)zf-H2C2_2(430)~(434)zf-H2C2_2(458)~(463)zf-H2C2_2(487)~(490)zf-H2C2_2(514)~(504)zf-C2H2(526)                                                                                                                                     |
| Q9UKH3 | (19)HERV-K_REC(105)~(115)HERV-K_env_2(282)~(485)GP41(681)                                                                                                                                                                                                                                                                         |
| Q9Y235 | (52)APOBEC_N(220)                                                                                                                                                                                                                                                                                                                 |
| O43300 | (66)LRR_8(121)~(134)LRR_8(193)~(206)LRR_4(244)~(254)LRR_8(311)                                                                                                                                                                                                                                                                    |
| Q86Y25 | (12)KRAB(52)~(216)zf-C2H2(238)~(231)zf-H2C2_2(255)~(258)zf-H2C2_2(283)~(287)zf-H2C2_2(310)~(315)zf-H2C2_2(338)~(345)zf-H2C2_2(366)~(371)zf-H2C2_2(395)~(400)zf-H2C2_2(422)~(427)zf-H2C2_2(450)~(454)zf-H2C2_2(478)~(483)zf-H2C2_2(507)                                                                                            |
| Q7Z478 | (581)DEAD(738)~(854)Helicase_C(985)~(1049)HA2(1137)~(1180)OB_NTP_bind(1302)                                                                                                                                                                                                                                                       |
| Q96Q40 | (105)Pkinase(387)                                                                                                                                                                                                                                                                                                                 |
| Q76KX8 | (9)KRAB(48)~(227)zf-C2H2(249)~(241)zf-H2C2_2(265)~(259)zf-C2H2(277)~(298)zf-H2C2_2(321)~(325)zf-H2C2_2(350)~(353)zf-H2C2_2(378)~(382)zf-H2C2_2(404)~(423)zf-C2H2(445)~(437)zf-H2C2_2(462)~(465)zf-H2C2_2(489)~(493)zf-H2C2_2(517)~(535)zf-C2H2(557)~(549)zf-H2C2_2(574)~(563)zf-C2H2(585)~(605)zf-H2C2_2(630)~(634)zf-H2C2_2(657) |
| P26368 | (151)RRM_6(224)~(261)RRM_1(330)~(400)RRM_1(459)                                                                                                                                                                                                                                                                                   |
| O95071 | (179)E3_UbLigase_EDD(230)~(2392)PABP(2449)~(2503)HECT(2798)                                                                                                                                                                                                                                                                       |

|        |                                                                                                                                                                                                                                                                                                                                                                                                    |
|--------|----------------------------------------------------------------------------------------------------------------------------------------------------------------------------------------------------------------------------------------------------------------------------------------------------------------------------------------------------------------------------------------------------|
| O94992 | (164)HEXIM(301)                                                                                                                                                                                                                                                                                                                                                                                    |
| Q9H5Y7 | (81)LRR_5(190)~(92)LRR_8(146)~(412)LRR_8(471)                                                                                                                                                                                                                                                                                                                                                      |
| P01703 | (5)V-set(102)                                                                                                                                                                                                                                                                                                                                                                                      |
| A6NMX2 | (63)IF4E(223)                                                                                                                                                                                                                                                                                                                                                                                      |
| O43379 | (403)WD40(441)                                                                                                                                                                                                                                                                                                                                                                                     |
| Q9UKB1 | (78)Beta-TrCP_D(116)~(241)WD40(266)~(271)WD40(306)~(311)WD40(346)~(357)WD40(389)~(394)WD40(429)~(433)WD40(469)~(484)WD40(518)                                                                                                                                                                                                                                                                      |
| Q9BZF9 | (73)Ank_2(164)~(134)Ank_4(187)~(164)Ank_2(230)                                                                                                                                                                                                                                                                                                                                                     |
| P63129 | (7)RVP(105)~(112)G-patch(154)                                                                                                                                                                                                                                                                                                                                                                      |
| O43296 | (14)KRAB(54)~(203)zf-C2H2(225)~(221)zf-H2C2_2(240)~(245)zf-H2C2_2(269)~(274)zf-H2C2_2(298)~(287)zf-C2H2(309)~(330)zf-H2C2_2(354)~(358)zf-H2C2_2(381)~(388)zf-H2C2_2(410)~(414)zf-H2C2_2(438)~(445)zf-H2C2_2(466)~(470)zf-H2C2_2(494)~(498)zf-H2C2_2(520)~(525)zf-H2C2_2(550)                                                                                                                       |
| O75820 | (14)KRAB(54)~(165)zf-H2C2_2(187)~(193)zf-H2C2_2(214)~(219)zf-H2C2_2(242)~(246)zf-H2C2_2(270)~(275)zf-H2C2_2(299)~(303)zf-H2C2_2(325)~(333)zf-H2C2_2(355)~(361)zf-H2C2_2(382)~(386)zf-H2C2_2(411)~(456)zf-C2H2(478)~(470)zf-H2C2_2(495)~(501)zf-H2C2_2(522)~(526)zf-H2C2_2(551)~(555)zf-H2C2_2(578)~(568)zf-C2H2(590)                                                                               |
| Q5T160 | (123)tRNA-synt_1d(449)~(463)DALR_1(578)                                                                                                                                                                                                                                                                                                                                                            |
| Q9Y6S9 | (51)MIT(113)~(383)Pkinase(539)                                                                                                                                                                                                                                                                                                                                                                     |
| O43172 | (108)PRP4(135)~(264)WD40(309)~(315)WD40(351)~(397)WD40(435)~(440)WD40(477)~(482)WD40(519)                                                                                                                                                                                                                                                                                                          |
| P62310 | (21)LSM(96)                                                                                                                                                                                                                                                                                                                                                                                        |
| O95777 | (4)LSM(71)                                                                                                                                                                                                                                                                                                                                                                                         |
| P19474 | (16)zf-C3HC4_4(54)~(289)PRY(337)~(341)SPRY(455)                                                                                                                                                                                                                                                                                                                                                    |
| Q6ZMV8 | (4)KRAB(44)~(160)zf-H2C2_2(182)~(187)zf-H2C2_2(211)~(228)zf-C2H2(250)~(243)zf-H2C2_2(266)~(270)zf-H2C2_2(294)~(298)zf-H2C2_2(322)~(327)zf-H2C2_2(350)~(340)zf-C2H2(362)~(383)zf-H2C2_2(407)~(410)zf-H2C2_2(434)~(439)zf-H2C2_2(462)~(467)zf-H2C2_2(490)                                                                                                                                            |
| Q6P6B7 | (38)Ank_4(91)~(75)Ank_2(157)~(141)Ank_2(234)~(243)Ank_2(331)~(274)Ank_4(327)                                                                                                                                                                                                                                                                                                                       |
| Q96FN9 | (11)Tyr_Deacylase(167)                                                                                                                                                                                                                                                                                                                                                                             |
| O60506 | (164)RRM_1(229)~(245)RRM_1(306)~(340)RRM_1(401)                                                                                                                                                                                                                                                                                                                                                    |
| Q8WXD0 | (138)LRR_8(195)~(272)LRR_5(386)~(282)LRR_8(341)~(432)7tm_1(691)                                                                                                                                                                                                                                                                                                                                    |
| Q9BTF0 | (274)UPF0020(412)                                                                                                                                                                                                                                                                                                                                                                                  |
| B2RU33 | (143)Ank_2(235)~(225)Ank_5(276)~(292)Ank_5(345)                                                                                                                                                                                                                                                                                                                                                    |
| P21506 | (14)KRAB(54)~(265)zf-C2H2(287)~(279)zf-H2C2_2(304)~(311)zf-H2C2_2(331)~(335)zf-H2C2_2(360)~(364)zf-H2C2_2(387)~(377)zf-C2H2(399)~(405)zf-C2H2(427)~(433)zf-C2H2(455)~(447)zf-H2C2_2(471)~(461)zf-C2H2(483)~(476)zf-H2C2_2(498)~(489)zf-C2H2(511)~(517)zf-C2H2(539)                                                                                                                                 |
| Q9UJW7 | (35)KRAB(74)~(334)zf-H2C2_2(359)~(364)zf-H2C2_2(387)~(377)zf-C2H2(399)~(391)zf-H2C2_2(416)~(420)zf-H2C2_2(442)~(450)zf-H2C2_2(471)~(475)zf-H2C2_2(500)~(489)zf-C2H2(511)~(532)zf-H2C2_2(554)~(562)zf-H2C2_2(582)~(589)zf-H2C2_2(609)~(615)zf-H2C2_2(639)~(643)zf-H2C2_2(665)~(673)zf-H2C2_2(695)~(698)zf-H2C2_2(722)~(727)zf-H2C2_2(750)~(754)zf-H2C2_2(778)~(786)zf-H2C2_2(807)~(796)zf-C2H2(818) |
| P15170 | (72)GTP_EFTU(271)~(391)GTP_EFTU_D3(494)                                                                                                                                                                                                                                                                                                                                                            |
| P51124 | (26)Trypsin(249)                                                                                                                                                                                                                                                                                                                                                                                   |
| Q9H4Q4 | (257)zf-H2C2_2(281)~(286)zf-H2C2_2(309)                                                                                                                                                                                                                                                                                                                                                            |
| Q9BQ67 | (45)CAF1C_H4-bd(112)~(256)WD40(290)~(301)WD40(336)~(343)WD40(382)                                                                                                                                                                                                                                                                                                                                  |
| Q9H765 | (57)Ank_2(148)~(104)Ank_5(155)                                                                                                                                                                                                                                                                                                                                                                     |
| Q6GMV3 | (26)PTH2(139)                                                                                                                                                                                                                                                                                                                                                                                      |

|        |                                                                                                                                                                                                                                                                                                                                                                                                                     |
|--------|---------------------------------------------------------------------------------------------------------------------------------------------------------------------------------------------------------------------------------------------------------------------------------------------------------------------------------------------------------------------------------------------------------------------|
| Q13395 | (1464)SpoU_methylase(1605)                                                                                                                                                                                                                                                                                                                                                                                          |
| Q92841 | (195)DEAD(365)~(406)Helicase_C(512)                                                                                                                                                                                                                                                                                                                                                                                 |
| Q86TM6 | (290)zf-RING_2(330)                                                                                                                                                                                                                                                                                                                                                                                                 |
| Q9NQX6 | (6)KRAB(46)~(131)zf-C2H2(153)~(146)zf-H2C2_2(168)~(174)zf-H2C2_2(196)~(201)zf-H2C2_2(225)~(230)zf-H2C2_2(254)~(260)zf-H2C2_2(280)~(286)zf-H2C2_2(310)~(314)zf-H2C2_2(336)~(341)zf-H2C2_2(365)~(369)zf-H2C2_2(392)~(397)zf-H2C2_2(422)~(426)zf-H2C2_2(450)                                                                                                                                                           |
| P31749 | (7)PH(106)~(151)Pkinase(408)~(429)Pkinase_C(476)                                                                                                                                                                                                                                                                                                                                                                    |
| P04049 | (57)RBD(130)~(139)C1_1(186)~(351)Pkinase_Tyr(605)                                                                                                                                                                                                                                                                                                                                                                   |
| Q9NZL3 | (8)KRAB(48)~(176)zf-C2H2(198)~(190)zf-H2C2_2(214)~(204)zf-C2H2(226)~(218)zf-H2C2_2(243)~(246)zf-H2C2_2(270)~(275)zf-H2C2_2(297)~(303)zf-H2C2_2(326)~(330)zf-H2C2_2(353)~(358)zf-H2C2_2(381)~(387)zf-H2C2_2(411)~(417)zf-H2C2_2(439)~(443)zf-H2C2_2(467)~(471)zf-H2C2_2(495)~(501)zf-H2C2_2(522)~(526)zf-H2C2_2(549)~(555)zf-H2C2_2(579)~(586)zf-H2C2_2(606)~(644)zf-H2C2_2(662)~(652)zf-C2H2(674)~(681)zf-C2H2(702) |
| Q6P2Q9 | (58)PRO8NT(209)~(396)PROC�(801)~(986)RRM_4(1076)~(1210)U5_2-snRNA_bdg(1343)~(1442)U6-snRNA_bdg(1600)~(1760)PRP8_domainIV(1989)~(2101)JAB(2204)~(2212)PROCT(2332)                                                                                                                                                                                                                                                    |
| P0CG39 | (106)Ank_2(198)~(188)Ank_5(239)~(255)Ank_5(308)~(611)CCDC144C(664)~(666)Actin(1038)                                                                                                                                                                                                                                                                                                                                 |
| A6NNA2 | (55)cwf21(98)~(527)SRRM_C(579)                                                                                                                                                                                                                                                                                                                                                                                      |
| Q9BX82 | (14)KRAB(54)~(206)zf-C2H2(228)~(220)zf-H2C2_2(245)~(248)zf-H2C2_2(273)~(277)zf-H2C2_2(300)~(304)zf-H2C2_2(328)~(333)zf-H2C2_2(356)~(363)zf-H2C2_2(385)~(393)zf-H2C2_2(414)~(420)zf-H2C2_2(442)~(445)zf-H2C2_2(469)~(473)zf-H2C2_2(496)~(502)zf-H2C2_2(526)~(529)zf-H2C2_2(553)~(557)zf-H2C2_2(581)~(588)zf-H2C2_2(609)                                                                                              |
| Q9UPR6 | (272)zf-met(295)~(320)zf-met(343)~(468)zf-met(492)~(658)DZF(901)                                                                                                                                                                                                                                                                                                                                                    |
| Q6SA08 | (25)Pkinase(293)                                                                                                                                                                                                                                                                                                                                                                                                    |
| Q8NDI1 | (13)NT-C2(163)~(445)CH(543)~(1071)DUF3585(1210)                                                                                                                                                                                                                                                                                                                                                                     |
| Q2M3X9 | (8)KRAB(48)~(224)zf-C2H2(246)~(238)zf-H2C2_2(262)~(269)zf-H2C2_2(289)~(295)zf-H2C2_2(319)~(385)zf-C2H2(407)~(399)zf-H2C2_2(423)~(427)zf-H2C2_2(451)~(458)zf-H2C2_2(479)~(485)zf-H2C2_2(508)~(512)zf-H2C2_2(535)~(542)zf-H2C2_2(563)                                                                                                                                                                                 |
| Q9Y262 | (152)Paf67(550)                                                                                                                                                                                                                                                                                                                                                                                                     |
| A6NHJ4 | (24)KRAB(63)~(245)zf-H2C2_2(268)~(286)zf-C2H2(308)~(300)zf-H2C2_2(325)~(328)zf-H2C2_2(352)~(356)zf-H2C2_2(380)~(398)zf-C2H2(420)~(426)zf-C2H2(448)~(441)zf-H2C2_2(465)~(468)zf-H2C2_2(493)~(496)zf-H2C2_2(520)~(525)zf-H2C2_2(548)~(555)zf-H2C2_2(576)~(586)zf-H2C2_2(605)~(594)zf-C2H2(616)                                                                                                                        |
| Q15208 | (89)Pkinase(369)                                                                                                                                                                                                                                                                                                                                                                                                    |
| O60563 | (13)Cyclin_N(148)~(189)Cyclin_N(217)                                                                                                                                                                                                                                                                                                                                                                                |
| Q9ULT6 | (292)zf-RING_2(334)                                                                                                                                                                                                                                                                                                                                                                                                 |
| Q9NRP7 | (4)Pkinase(254)~(1157)HEAT_2(1258)                                                                                                                                                                                                                                                                                                                                                                                  |
| Q5C9Z4 | (363)MIF4G(559)~(655)MA3(760)                                                                                                                                                                                                                                                                                                                                                                                       |
| Q9Y6M0 | (42)Trypsin(281)                                                                                                                                                                                                                                                                                                                                                                                                    |
| Q7L2E3 | (667)Helicase_C(786)~(851)HA2(938)                                                                                                                                                                                                                                                                                                                                                                                  |
| Q9HAV0 | (47)WD40(83)~(98)WD40(125)~(137)WD40(170)~(176)WD40(212)~(217)WD40(254)~(265)WD40(298)~(306)WD40(340)                                                                                                                                                                                                                                                                                                               |
| Q9NRJ5 | (21)PAP_central(363)~(366)PAP_RNA-bind(427)                                                                                                                                                                                                                                                                                                                                                                         |
| O00141 | (98)Pkinase(355)                                                                                                                                                                                                                                                                                                                                                                                                    |
| O00567 | (5)NOP5NT(70)~(174)Nop(405)                                                                                                                                                                                                                                                                                                                                                                                         |
| Q6ZMW3 | (3)HELP(48)~(55)WD40(91)~(100)WD40(136)~(235)WD40(263)~(316)WD40(353)~(556)WD40(591)~(667)HELP(714)~(722)WD40(757)~(896)WD40(929)~(994)WD40(1025)~(1232)WD40(1266)~(1342)HELP(1401)~(1683)WD40(1715)~(1925)WD40(1955)                                                                                                                                                                                               |
| Q9BRU9 | (51)Fcf1(149)                                                                                                                                                                                                                                                                                                                                                                                                       |

|        |                                                                                                                                                                                                                                                                                                                                        |
|--------|----------------------------------------------------------------------------------------------------------------------------------------------------------------------------------------------------------------------------------------------------------------------------------------------------------------------------------------|
| Q8N7Z5 | (495)Ank_2(585)~(1159)Ank_2(1251)                                                                                                                                                                                                                                                                                                      |
| Q13555 | (14)Pkinase(272)~(426)CaMKII_AD(553)                                                                                                                                                                                                                                                                                                   |
| Q7Z2T5 | (242)TRM(550)~(629)TRM(687)                                                                                                                                                                                                                                                                                                            |
| Q9NV66 | (81)Flavodoxin_1(217)~(411)Radical_SAM(592)~(595)Wyosine_form(657)                                                                                                                                                                                                                                                                     |
| P15735 | (25)Pkinase(291)                                                                                                                                                                                                                                                                                                                       |
| Q96DU9 | (20)RRM_1(88)~(108)RRM_1(175)~(201)RRM_1(269)~(304)RRM_1(372)                                                                                                                                                                                                                                                                          |
| Q8NFH5 | (169)Nup35_RRM(250)                                                                                                                                                                                                                                                                                                                    |
| Q9GZS1 | (99)RNA_pol_I_A49(471)                                                                                                                                                                                                                                                                                                                 |
| Q9BSG1 | (14)KRAB(54)~(188)zf-H2C2_2(213)~(216)zf-H2C2_2(239)~(244)zf-H2C2_2(267)~(272)zf-H2C2_2(296)~(301)zf-H2C2_2(324)~(342)zf-C2H2(364)~(356)zf-H2C2_2(380)~(385)zf-H2C2_2(409)                                                                                                                                                             |
| Q9BTN0 | (62)LRR_8(119)~(157)LRR_8(216)~(296)I-set(383)                                                                                                                                                                                                                                                                                         |
| Q01130 | (17)RRM_1(86)                                                                                                                                                                                                                                                                                                                          |
| Q9NT99 | (88)LRR_8(146)~(100)LRR_5(223)~(260)LRR_8(312)~(364)I-set(453)                                                                                                                                                                                                                                                                         |
| P35637 | (287)RRM_1(365)~(422)zf-RanBP(453)                                                                                                                                                                                                                                                                                                     |
| P01766 | (12)V-set(98)                                                                                                                                                                                                                                                                                                                          |
| Q05823 | (29)Ank_2(120)~(97)Ank_2(199)~(172)Ank_2(270)~(217)Ank_2(299)~(386)Pkinase(513)~(592)Ribonuc_2-5A(716)                                                                                                                                                                                                                                 |
| Q86SJ2 | (117)LRR_8(175)                                                                                                                                                                                                                                                                                                                        |
| Q8IX01 | (589)Surp(636)~(787)Surp(836)~(1012)G-patch(1054)                                                                                                                                                                                                                                                                                      |
| Q15746 | (33)I-set(123)~(161)I-set(250)~(251)23ISL(411)~(414)I-set(504)~(514)I-set(600)~(624)I-set(712)~(722)I-set(809)~(1098)I-set(1187)~(1238)I-set(1327)~(1334)fn3(1416)~(1464)Pkinase(1719)~(1809)I-set(1899)                                                                                                                               |
| Q13557 | (14)Pkinase(272)~(346)CaMKII_AD(473)                                                                                                                                                                                                                                                                                                   |
| P52657 | (3)TFIIA_gamma_N(48)~(52)TFIIA_gamma_C(100)                                                                                                                                                                                                                                                                                            |
| Q8N9Z0 | (24)KRAB(64)~(218)zf-H2C2_2(243)~(232)zf-C2H2(254)~(246)zf-H2C2_2(270)~(260)zf-C2H2(282)~(274)zf-H2C2_2(297)~(303)zf-H2C2_2(327)~(330)zf-H2C2_2(354)~(359)zf-H2C2_2(382)~(387)zf-H2C2_2(410)~(415)zf-H2C2_2(438)                                                                                                                       |
| Q96JP0 | (5)Ank_4(61)~(88)Ank_2(178)~(149)Ank_4(202)~(480)Ank_2(558)                                                                                                                                                                                                                                                                            |
| O95834 | (19)HELP(92)~(287)WD40(321)~(374)WD40(405)~(459)WD40(487)~(611)WD40(646)                                                                                                                                                                                                                                                               |
| O75569 | (35)dsrm(99)~(127)dsrm(191)~(242)dsrm(306)                                                                                                                                                                                                                                                                                             |
| Q96GC5 | (92)Ribosomal_S10(187)                                                                                                                                                                                                                                                                                                                 |
| Q8N9K5 | (46)KRAB(86)~(222)zf-H2C2_2(246)~(249)zf-H2C2_2(273)~(281)zf-H2C2_2(301)~(309)zf-H2C2_2(328)~(334)zf-H2C2_2(357)~(362)zf-H2C2_2(385)~(391)zf-H2C2_2(413)~(418)zf-H2C2_2(442)~(448)zf-H2C2_2(468)~(459)zf-C2H2(481)~(502)zf-H2C2_2(524)                                                                                                 |
| Q9UK13 | (30)KRAB(70)~(170)zf-C2H2(192)~(188)zf-H2C2_2(207)~(215)zf-H2C2_2(236)~(226)zf-C2H2(248)~(240)zf-H2C2_2(264)~(268)zf-H2C2_2(292)~(297)zf-H2C2_2(319)~(325)zf-H2C2_2(348)~(352)zf-H2C2_2(375)~(383)zf-H2C2_2(403)~(409)zf-H2C2_2(433)~(439)zf-H2C2_2(460)~(465)zf-H2C2_2(487)~(493)zf-H2C2_2(517)~(506)zf-C2H2(525)~(548)zf-H2C2_2(571) |
| P11802 | (6)Pkinase(295)                                                                                                                                                                                                                                                                                                                        |
| Q9UQB9 | (43)Pkinase(293)                                                                                                                                                                                                                                                                                                                       |
| P27448 | (56)Pkinase(307)~(711)KA1(753)                                                                                                                                                                                                                                                                                                         |
| P17097 | (4)KRAB(41)~(250)zf-C2H2(272)~(265)zf-H2C2_2(287)~(295)zf-H2C2_2(316)~(336)zf-C2H2(356)~(349)zf-H2C2_2(372)~(399)zf-H2C2_2(422)~(428)zf-H2C2_2(451)~(456)zf-H2C2_2(479)~(484)zf-H2C2_2(507)~(512)zf-H2C2_2(535)~(540)zf-H2C2_2(563)~(581)zf-C2H2(603)~(649)zf-H2C2_2(672)                                                              |
| A2PYH4 | (284)DEAD(462)~(516)Helicase_C(658)~(777)Sec63(1090)                                                                                                                                                                                                                                                                                   |
| Q9NPD3 | (21)RNase_PH(152)                                                                                                                                                                                                                                                                                                                      |

|        |                                                                                                                                                                                                                                                                                                                                                                                                         |
|--------|---------------------------------------------------------------------------------------------------------------------------------------------------------------------------------------------------------------------------------------------------------------------------------------------------------------------------------------------------------------------------------------------------------|
| P15880 | (102)Ribosomal_S5(166)~(185)Ribosomal_S5_C(256)                                                                                                                                                                                                                                                                                                                                                         |
| Q9H898 | (15)zf-met(38)~(77)zf-met(99)~(146)zf-C2H2_jaz(170)~(198)zf-met(222)                                                                                                                                                                                                                                                                                                                                    |
| Q9H361 | (13)RRM_1(83)~(101)RRM_1(168)~(193)RRM_1(261)~(296)RRM_1(363)~(543)PABP(609)                                                                                                                                                                                                                                                                                                                            |
| P22626 | (23)RRM_1(86)~(114)RRM_1(173)                                                                                                                                                                                                                                                                                                                                                                           |
| Q99640 | (110)Pkinase(358)                                                                                                                                                                                                                                                                                                                                                                                       |
| Q495B1 | (19)Ank_2(118)~(101)Ank_4(142)~(163)Ank_2(253)~(262)Ank_2(354)                                                                                                                                                                                                                                                                                                                                          |
| Q86WK6 | (66)LRR_4(101)~(110)LRR_8(170)~(159)LRR_4(201)                                                                                                                                                                                                                                                                                                                                                          |
| O75554 | (8)zf-U1(43)~(128)WW(153)~(169)WW(194)                                                                                                                                                                                                                                                                                                                                                                  |
| Q96GX5 | (37)Pkinase(194)~(738)Pkinase(835)                                                                                                                                                                                                                                                                                                                                                                      |
| Q92828 | (7)DUF1899(69)~(80)WD40(111)~(172)WD40(208)~(350)WD40_4(392)                                                                                                                                                                                                                                                                                                                                            |
| Q3SY52 | (27)KRAB(67)~(239)zf-C2H2(261)~(253)zf-H2C2_2(277)~(281)zf-H2C2_2(305)~(310)zf-H2C2_2(333)~(338)zf-H2C2_2(361)~(366)zf-H2C2_2(389)~(394)zf-H2C2_2(417)~(424)zf-H2C2_2(445)~(451)zf-H2C2_2(473)                                                                                                                                                                                                          |
| Q9UNW9 | (36)KH_1(94)~(134)KH_1(196)~(409)KH_1(473)                                                                                                                                                                                                                                                                                                                                                              |
| Q9HCL3 | (6)KRAB(46)~(172)zf-C2H2(194)~(187)zf-H2C2_2(210)~(214)zf-H2C2_2(238)~(243)zf-H2C2_2(265)~(271)zf-H2C2_2(294)~(298)zf-H2C2_2(322)~(326)zf-H2C2_2(349)~(355)zf-H2C2_2(377)~(383)zf-H2C2_2(406)~(413)zf-H2C2_2(433)~(439)zf-H2C2_2(461)~(467)zf-H2C2_2(489)~(495)zf-H2C2_2(518)                                                                                                                           |
| Q6EMK4 | (101)LRR_8(160)~(152)LRR_4(181)~(193)LRR_8(249)                                                                                                                                                                                                                                                                                                                                                         |
| Q9H7Z3 | (310)NRDE-2(647)~(782)TPR_14(807)~(986)NRDE-2(1101)                                                                                                                                                                                                                                                                                                                                                     |
| P17027 | (196)zf-C2H2(218)~(213)zf-H2C2_2(235)~(241)zf-H2C2_2(262)~(266)zf-H2C2_2(290)~(297)zf-H2C2_2(318)~(325)zf-H2C2_2(345)~(351)zf-H2C2_2(375)~(381)zf-H2C2_2(402)~(409)zf-H2C2_2(429)~(435)zf-H2C2_2(458)~(463)zf-H2C2_2(486)~(490)zf-H2C2_2(514)~(519)zf-H2C2_2(542)~(549)zf-H2C2_2(569)~(574)zf-H2C2_2(598)~(616)zf-C2H2(638)                                                                             |
| P05455 | (17)La(73)~(113)RRM_1(178)~(231)RRM_3(334)                                                                                                                                                                                                                                                                                                                                                              |
| Q9UMS4 | (68)Prp19(133)~(255)WD40(292)~(297)WD40(328)~(352)WD40(378)~(384)WD40(420)                                                                                                                                                                                                                                                                                                                              |
| P60323 | (58)zf-nanos(110)                                                                                                                                                                                                                                                                                                                                                                                       |
| O43347 | (23)RRM_1(89)~(111)RRM_1(177)                                                                                                                                                                                                                                                                                                                                                                           |
| Q8TD08 | (16)Pkinase(304)                                                                                                                                                                                                                                                                                                                                                                                        |
| O43155 | (101)LRR_8(145)~(149)LRR_8(174)~(182)LRR_8(242)~(253)LRR_8(310)                                                                                                                                                                                                                                                                                                                                         |
| Q15399 | (69)LRR_8(125)~(372)LRR_4(410)~(445)LRR_8(500)~(637)TIR(778)                                                                                                                                                                                                                                                                                                                                            |
| O14607 | (94)TPR_11(158)~(126)TPR_11(191)~(127)TPR_1(160)~(203)TPR_8(230)~(266)TPR_11(309)~(314)TPR_11(376)~(1080)JmjC(1188)                                                                                                                                                                                                                                                                                     |
| O00628 | (72)WD40(96)~(103)WD40(141)~(145)WD40(184)~(233)WD40(271)                                                                                                                                                                                                                                                                                                                                               |
| Q68DY1 | (5)KRAB(44)~(165)zf-H2C2_2(184)~(188)zf-H2C2_2(212)~(215)zf-H2C2_2(240)~(244)zf-H2C2_2(266)~(272)zf-H2C2_2(295)~(300)zf-H2C2_2(324)~(328)zf-H2C2_2(352)~(356)zf-H2C2_2(380)~(383)zf-H2C2_2(408)~(411)zf-H2C2_2(435)~(440)zf-H2C2_2(463)~(467)zf-H2C2_2(491)                                                                                                                                             |
| Q05BV3 | (4)HELP(47)~(235)WD40(263)~(318)WD40(353)~(556)WD40(592)~(662)HELP(714)~(718)WD40(757)~(762)WD40(802)~(896)WD40(929)~(994)WD40(1026)~(1345)HELP(1402)~(1689)WD40(1722)~(1930)WD40(1963)                                                                                                                                                                                                                 |
| P43246 | (18)MutS_I(131)~(156)MutS_II(289)~(306)MutS_III(609)~(619)MutS_V(853)                                                                                                                                                                                                                                                                                                                                   |
| Q9Y2A4 | (4)KRAB(42)~(156)zf-H2C2_2(180)~(183)zf-H2C2_2(206)~(215)zf-H2C2_2(235)~(240)zf-H2C2_2(262)~(268)zf-H2C2_2(290)~(299)zf-H2C2_2(319)~(323)zf-H2C2_2(348)~(352)zf-H2C2_2(375)~(379)zf-H2C2_2(401)~(408)zf-H2C2_2(432)~(436)zf-H2C2_2(458)~(463)zf-H2C2_2(481)~(491)zf-H2C2_2(515)~(519)zf-H2C2_2(543)~(546)zf-H2C2_2(570)~(576)zf-H2C2_2(599)~(604)zf-H2C2_2(626)~(616)zf-C2H2_6(641)~(638)zf-H2C2_2(659) |
| P04437 | (32)V-set(138)                                                                                                                                                                                                                                                                                                                                                                                          |
| Q05481 | (13)KRAB(53)~(169)zf-H2C2_2(191)~(225)zf-H2C2_2(249)~(238)zf-C2H2(257)~(281)zf-                                                                                                                                                                                                                                                                                                                         |

|        |                                                                                                                                                                                                                                                                                                                                                                                                                                                                                                                                                                                                                          |
|--------|--------------------------------------------------------------------------------------------------------------------------------------------------------------------------------------------------------------------------------------------------------------------------------------------------------------------------------------------------------------------------------------------------------------------------------------------------------------------------------------------------------------------------------------------------------------------------------------------------------------------------|
|        | H2C2_2(305)~(309)zf-H2C2_2(333)~(337)zf-H2C2_2(361)~(365)zf-H2C2_2(389)~(406)zf-C2H2(428)~(420)zf-H2C2_2(443)~(448)zf-H2C2_2(471)~(477)zf-H2C2_2(500)~(505)zf-H2C2_2(528)~(533)zf-H2C2_2(557)~(546)zf-C2H2(568)~(588)zf-H2C2_2(611)~(617)zf-H2C2_2(641)~(644)zf-H2C2_2(669)~(673)zf-H2C2_2(697)~(714)zf-C2H2(736)~(728)zf-H2C2_2(751)~(756)zf-H2C2_2(779)~(785)zf-H2C2_2(809)~(813)zf-H2C2_2(837)~(854)zf-C2H2(876)~(910)zf-C2H2(932)~(924)zf-H2C2_2(948)~(953)zf-H2C2_2(976)~(994)zf-C2H2_4(1016)~(1019)SprT-like(1060)~(1066)SprT-like(1145)                                                                           |
| O75971 | (7)SNAPc19(95)                                                                                                                                                                                                                                                                                                                                                                                                                                                                                                                                                                                                           |
| Q32P41 | (199)Met_10(398)                                                                                                                                                                                                                                                                                                                                                                                                                                                                                                                                                                                                         |
| Q6ZMY9 | (14)KRAB(54)~(192)zf-H2C2_2(216)~(220)zf-H2C2_2(243)~(248)zf-H2C2_2(272)~(276)zf-H2C2_2(298)~(289)zf-C2H2(311)~(304)zf-H2C2_2(326)~(383)zf-H2C2_2(406)~(410)zf-H2C2_2(434)~(424)zf-C2H2(446)~(439)zf-H2C2_2(462)                                                                                                                                                                                                                                                                                                                                                                                                         |
| Q13188 | (28)Pkinase(278)~(437)Mst1_SARAH(484)                                                                                                                                                                                                                                                                                                                                                                                                                                                                                                                                                                                    |
| Q9BSV6 | (218)tRNA_int_endo(301)                                                                                                                                                                                                                                                                                                                                                                                                                                                                                                                                                                                                  |
| Q2M1K9 | (138)zf-C2H2(160)~(182)zf-H2C2_2(204)~(208)zf-H2C2_2(232)~(222)zf-C2H2(244)~(263)zf-C2H2(286)~(295)zf-Di19(343)~(409)zf-Di19(464)~(480)zf-C2H2(503)~(516)zf-Di19(542)~(563)zf-C2H2_4(588)~(632)zf-C2H2(654)~(663)zf-Di19(715)~(720)zf-Di19(773)~(764)zf-H2C2_2(792)~(807)zf-C2H2(830)~(930)zf-C2H2_6(954)~(944)zf-H2C2_2(968)~(1121)zf-C2H2(1143)~(1228)zf-Di19(1283)                                                                                                                                                                                                                                                    |
| Q9H694 | (78)KH_1(122)~(134)KH_1(199)~(288)KH_1(347)~(880)SAM_1(933)                                                                                                                                                                                                                                                                                                                                                                                                                                                                                                                                                              |
| Q9C0D5 | (944)Ank_2(1021)~(1081)Ank_4(1132)~(1116)Ank_2(1208)~(1164)Ank_5(1218)~(1291)T PR_11(1367)                                                                                                                                                                                                                                                                                                                                                                                                                                                                                                                               |
| P17029 | (52)SCAN(138)~(392)zf-H2C2_2(415)~(419)zf-H2C2_2(444)~(448)zf-H2C2_2(471)~(475)zf-H2C2_2(499)~(507)zf-H2C2_2(528)                                                                                                                                                                                                                                                                                                                                                                                                                                                                                                        |
| O14974 | (73)Ank_4(126)~(201)Ank_4(252)~(931)PRKG1_interact(1030)                                                                                                                                                                                                                                                                                                                                                                                                                                                                                                                                                                 |
| Q9UK32 | (73)Pkinase(330)~(426)Pkinase(683)                                                                                                                                                                                                                                                                                                                                                                                                                                                                                                                                                                                       |
| P01825 | (9)V-set(115)                                                                                                                                                                                                                                                                                                                                                                                                                                                                                                                                                                                                            |
| P23588 | (99)RRM_1(167)                                                                                                                                                                                                                                                                                                                                                                                                                                                                                                                                                                                                           |
| A8MQ14 | (7)KRAB(47)~(190)zf-H2C2_2(208)~(212)zf-H2C2_2(234)~(269)zf-H2C2_2(292)~(296)zf-H2C2_2(319)~(324)zf-H2C2_2(347)~(352)zf-H2C2_2(375)~(380)zf-H2C2_2(403)~(411)zf-H2C2_2(431)~(438)zf-H2C2_2(459)~(463)zf-H2C2_2(487)~(493)zf-H2C2_2(515)~(519)zf-H2C2_2(543)~(551)zf-H2C2_2(572)~(576)zf-H2C2_2(599)~(604)zf-H2C2_2(626)~(632)zf-H2C2_2(655)~(660)zf-H2C2_2(683)~(688)zf-H2C2_2(711)~(746)zf-H2C2_2(768)~(774)zf-H2C2_2(796)~(806)zf-H2C2_2(823)~(841)zf-C2H2(863)~(857)zf-H2C2_2(879)~(887)zf-H2C2_2(907)~(912)zf-H2C2_2(935)~(925)Zn-ribbon_8(964)~(981)zf-C2H2_6(1003)~(1009)Zn-ribbon_8(1044)~(1037)Zn-ribbon_8(1076) |
| P01778 | (11)V-set(113)                                                                                                                                                                                                                                                                                                                                                                                                                                                                                                                                                                                                           |
| Q9NSQ0 | (1)RRP7(103)                                                                                                                                                                                                                                                                                                                                                                                                                                                                                                                                                                                                             |
| Q9BYJ9 | (390)YTH(523)                                                                                                                                                                                                                                                                                                                                                                                                                                                                                                                                                                                                            |
| P0CG04 | (14)C1-set(95)                                                                                                                                                                                                                                                                                                                                                                                                                                                                                                                                                                                                           |
| Q8WXI3 | (61)Ank_2(178)~(192)Ank_2(291)~(280)Ank_5(334)                                                                                                                                                                                                                                                                                                                                                                                                                                                                                                                                                                           |
| Q96H40 | (14)KRAB(53)~(169)zf-H2C2_2(192)~(210)zf-C2H2(232)~(224)zf-H2C2_2(249)~(253)zf-H2C2_2(275)~(281)zf-H2C2_2(305)~(309)zf-H2C2_2(331)~(337)zf-H2C2_2(361)~(364)zf-H2C2_2(388)~(395)zf-H2C2_2(417)~(420)zf-H2C2_2(443)                                                                                                                                                                                                                                                                                                                                                                                                       |
| Q6NUI6 | (65)LRR_8(122)~(139)LRR_8(194)~(254)LRR_8(312)~(450)LRR_8(509)~(569)LRR_8(614)~(618)LRR_8(676)                                                                                                                                                                                                                                                                                                                                                                                                                                                                                                                           |
| Q9H307 | (1)Pinin_SDK_N(132)~(136)Pinin_SDK_memA(260)                                                                                                                                                                                                                                                                                                                                                                                                                                                                                                                                                                             |
| P51508 | (21)KRAB(61)~(330)zf-C2H2(352)~(347)zf-H2C2_2(367)~(372)zf-H2C2_2(396)~(400)zf-H2C2_2(425)~(414)zf-C2H2(436)~(457)zf-H2C2_2(479)~(485)zf-H2C2_2(509)~(512)zf-H2C2_2(536)~(540)zf-H2C2_2(563)~(571)zf-H2C2_2(592)~(596)zf-H2C2_2(620)~(624)zf-H2C2_2(648)                                                                                                                                                                                                                                                                                                                                                                 |
| Q6PK81 | (15)KRAB(55)~(191)zf-C2H2(213)~(206)zf-H2C2_2(230)~(249)zf-C2H2(269)~(262)zf-H2C2_2(286)~(290)zf-H2C2_2(313)~(317)zf-H2C2_2(342)~(348)zf-H2C2_2(369)~(373)zf-                                                                                                                                                                                                                                                                                                                                                                                                                                                            |

|        |                                                                                                                                                                                                                                                                                                                                                                                   |
|--------|-----------------------------------------------------------------------------------------------------------------------------------------------------------------------------------------------------------------------------------------------------------------------------------------------------------------------------------------------------------------------------------|
|        | H2C2_2(397)~(401)zf-H2C2_2(426)                                                                                                                                                                                                                                                                                                                                                   |
| P01593 | (6)V-set(106)                                                                                                                                                                                                                                                                                                                                                                     |
| Q8NDQ6 | (6)KRAB(46)~(202)zf-H2C2_2(226)~(230)zf-H2C2_2(253)~(258)zf-H2C2_2(280)~(286)zf-H2C2_2(308)~(314)zf-H2C2_2(337)~(342)zf-H2C2_2(364)~(370)zf-H2C2_2(393)~(398)zf-H2C2_2(422)~(425)zf-H2C2_2(448)~(454)zf-H2C2_2(476)~(485)zf-H2C2_2(504)~(510)zf-H2C2_2(532)~(537)zf-H2C2_2(562)~(566)zf-H2C2_2(590)~(593)zf-H2C2_2(616)~(621)zf-H2C2_2(645)                                       |
| O14802 | (13)RNA_pol_Rpb1_1(356)~(358)RNA_pol_Rpb1_2(524)~(528)RNA_pol_Rpb1_3(703)~(732)RNA_pol_Rpb1_4(834)~(841)RNA_pol_Rpb1_5(1315)                                                                                                                                                                                                                                                      |
| P01876 | (16)C1-set(94)~(136)C1-set(214)~(236)C1-set(321)                                                                                                                                                                                                                                                                                                                                  |
| P67809 | (61)CSD(127)                                                                                                                                                                                                                                                                                                                                                                      |
| Q8TB69 | (4)KRAB(43)~(282)zf-H2C2_2(302)~(306)zf-H2C2_2(330)~(335)zf-H2C2_2(358)~(363)zf-H2C2_2(386)~(392)zf-H2C2_2(414)~(404)zf-C2H2(426)~(446)zf-H2C2_2(469)~(474)zf-H2C2_2(499)~(502)zf-H2C2_2(526)                                                                                                                                                                                     |
| Q96NX5 | (26)Pkinase(277)                                                                                                                                                                                                                                                                                                                                                                  |
| A6NM28 | (14)KRAB(54)~(166)zf-H2C2_2(190)~(194)zf-H2C2_2(219)~(208)zf-C2H2(230)~(250)zf-H2C2_2(275)~(264)zf-C2H2(286)~(278)zf-H2C2_2(302)~(310)zf-H2C2_2(329)~(335)zf-H2C2_2(358)                                                                                                                                                                                                          |
| Q5VT99 | (58)LRR_8(116)~(129)LRR_8(187)                                                                                                                                                                                                                                                                                                                                                    |
| Q9UK10 | (8)KRAB(48)~(176)zf-C2H2(198)~(190)zf-H2C2_2(214)~(218)zf-H2C2_2(243)~(247)zf-H2C2_2(270)~(275)zf-H2C2_2(298)~(302)zf-H2C2_2(325)~(330)zf-H2C2_2(353)~(358)zf-H2C2_2(381)~(387)zf-H2C2_2(411)~(417)zf-H2C2_2(439)~(443)zf-H2C2_2(465)~(471)zf-H2C2_2(495)~(499)zf-H2C2_2(523)~(527)zf-H2C2_2(550)~(554)zf-H2C2_2(579)~(596)zf-C2H2(618)~(614)zf-H2C2_2(633)~(624)Zn-ribbon_8(659) |
| Q9H633 | (13)Rpr2(96)                                                                                                                                                                                                                                                                                                                                                                      |
| Q8TDC3 | (34)Pkinase(284)                                                                                                                                                                                                                                                                                                                                                                  |
| P55199 | (7)ELL(292)~(513)Occludin_ELL(614)                                                                                                                                                                                                                                                                                                                                                |
| Q13868 | (26)ECR1_N(63)~(169)KH_6(208)                                                                                                                                                                                                                                                                                                                                                     |
| O15084 | (12)Ank_2(104)~(75)Ank_4(127)~(140)Ank_4(193)~(177)Ank_2(269)~(210)Ank_2(300)~(338)Ank(367)~(376)Ank_2(467)~(462)Ank_5(511)~(546)Ank_2(613)~(617)Ank_2(683)~(691)Ank_2(779)~(792)Ank_2(887)~(854)Ank_2(912)~(918)Ank_5(962)                                                                                                                                                       |
| O94892 | (8)KRAB(48)~(193)zf-H2C2_2(215)~(220)zf-H2C2_2(244)~(261)zf-C2H2(283)~(276)zf-H2C2_2(298)~(303)zf-H2C2_2(327)~(334)zf-H2C2_2(356)~(363)zf-H2C2_2(383)~(390)zf-H2C2_2(410)~(401)zf-C2H2(423)~(446)zf-H2C2_2(466)~(474)zf-H2C2_2(494)~(500)zf-H2C2_2(523)~(527)zf-H2C2_2(551)~(541)zf-C2H2(563)~(585)zf-H2C2_2(607)~(614)zf-H2C2_2(636)                                             |
| Q96E39 | (10)RRM_1(80)~(173)RBM1CTR(217)                                                                                                                                                                                                                                                                                                                                                   |
| Q9HCE5 | (186)MT-A70(362)                                                                                                                                                                                                                                                                                                                                                                  |
| Q9H3H1 | (58)IPPT(332)                                                                                                                                                                                                                                                                                                                                                                     |
| Q13206 | (93)DEAD(263)~(299)Helicase_C(409)~(450)DUF4217(510)                                                                                                                                                                                                                                                                                                                              |
| Q9UGL1 | (33)JmjN(66)~(100)ARID(183)~(312)PHD(357)~(486)JmjC(602)~(692)zf-C5HC2(744)~(757)PLU-1(1088)~(1178)PHD(1223)~(1492)PHD(1537)                                                                                                                                                                                                                                                      |
| P0C1S8 | (214)Pkinase(483)                                                                                                                                                                                                                                                                                                                                                                 |
| Q96DI7 | (58)WD40(94)~(103)WD40(137)~(143)WD40(180)~(196)WD40(221)~(226)WD40(263)~(272)WD40(313)~(319)WD40(352)                                                                                                                                                                                                                                                                            |
| Q96JB3 | (36)BTB(141)~(442)zf-C2H2_jaz(463)~(505)zf-C2H2_jaz(527)~(533)zf-C2H2(555)~(576)zf-H2C2_2(599)                                                                                                                                                                                                                                                                                    |
| Q9P0M9 | (31)Ribosomal_L27(101)                                                                                                                                                                                                                                                                                                                                                            |
| Q9BX10 | (174)GTP_EFTU(393)                                                                                                                                                                                                                                                                                                                                                                |
| Q7L3S4 | (63)zf-C2H2(85)~(105)zf-H2C2_2(129)~(133)zf-H2C2_2(157)~(161)zf-H2C2_2(184)~(190)zf-H2C2_2(213)~(217)zf-H2C2_2(242)~(245)zf-H2C2_2(268)~(287)Zn-ribbon_8(316)                                                                                                                                                                                                                     |
| A6NN14 | (13)KRAB(53)~(196)zf-H2C2_2(219)~(223)zf-H2C2_2(246)~(251)zf-H2C2_2(274)~(278)zf-H2C2_2(302)~(306)zf-H2C2_2(331)~(320)zf-C2H2(342)~(363)zf-                                                                                                                                                                                                                                       |



|        |                                                                                                                                                                                                                                                                                                                                                                                                                                                                                                |
|--------|------------------------------------------------------------------------------------------------------------------------------------------------------------------------------------------------------------------------------------------------------------------------------------------------------------------------------------------------------------------------------------------------------------------------------------------------------------------------------------------------|
|        | H2C2_2(386)~(391)zf-H2C2_2(414)~(419)zf-H2C2_2(442)~(447)zf-H2C2_2(470)~(474)zf-H2C2_2(499)~(502)zf-H2C2_2(526)~(531)zf-H2C2_2(554)~(559)zf-H2C2_2(583)~(586)zf-H2C2_2(611)~(615)zf-H2C2_2(638)~(642)zf-H2C2_2(667)~(670)zf-H2C2_2(695)~(698)zf-H2C2_2(722)~(727)zf-H2C2_2(751)~(754)zf-H2C2_2(778)~(782)zf-H2C2_2(806)~(811)zf-H2C2_2(835)~(838)zf-H2C2_2(862)~(866)zf-H2C2_2(890)~(895)zf-H2C2_2(919)~(922)zf-H2C2_2(946)~(964)zf-C2H2_4(986)~(992)zf-C2H2_jaz(1011)~(1104)Zn-ribbon_8(1140) |
| O75534 | (27)CSD(89)~(186)CSD(246)~(309)CSD(335)~(351)CSD(411)~(469)S1-like(496)~(521)CSD(581)~(675)CSD(737)~(757)SUZ-C(786)                                                                                                                                                                                                                                                                                                                                                                            |
| Q8N2N9 | (24)Ank_2(116)~(123)Ank_2(215)~(949)CCDC144C(1240)~(1266)CCDC144C(1349)                                                                                                                                                                                                                                                                                                                                                                                                                        |
| P06870 | (25)Trypsin(254)                                                                                                                                                                                                                                                                                                                                                                                                                                                                               |
| O95453 | (4)CAF1(390)~(437)RNA_bind(514)                                                                                                                                                                                                                                                                                                                                                                                                                                                                |
| Q9NQI0 | (312)DEAD(491)~(527)Helicase_C(635)                                                                                                                                                                                                                                                                                                                                                                                                                                                            |
| P06310 | (26)V-set(131)                                                                                                                                                                                                                                                                                                                                                                                                                                                                                 |
| P11309 | (129)Pkinase(381)                                                                                                                                                                                                                                                                                                                                                                                                                                                                              |
| C9JN71 | (4)KRAB(44)~(130)zf-H2C2_2(152)~(158)zf-H2C2_2(181)~(186)zf-H2C2_2(207)~(214)zf-H2C2_2(236)~(241)zf-H2C2_2(265)~(270)zf-H2C2_2(293)~(298)zf-H2C2_2(320)~(326)zf-H2C2_2(349)~(353)zf-H2C2_2(378)~(384)zf-H2C2_2(405)~(410)zf-H2C2_2(432)~(438)zf-H2C2_2(460)~(467)zf-H2C2_2(488)~(494)zf-H2C2_2(517)                                                                                                                                                                                            |
| P52738 | (6)KRAB(46)~(163)zf-C2H2(183)~(176)zf-H2C2_2(199)~(203)zf-H2C2_2(228)~(234)zf-H2C2_2(256)~(245)zf-C2H2(267)~(288)zf-H2C2_2(311)~(315)zf-H2C2_2(338)~(345)zf-H2C2_2(367)~(372)zf-H2C2_2(396)~(402)zf-H2C2_2(423)                                                                                                                                                                                                                                                                                |
| Q9BRD0 | (460)Bud13(600)                                                                                                                                                                                                                                                                                                                                                                                                                                                                                |
| Q15915 | (242)zf-C2H2_4(260)~(289)zf-H2C2_2(314)~(318)zf-H2C2_2(345)~(362)zf-C2H2(384)                                                                                                                                                                                                                                                                                                                                                                                                                  |
| Q96SK3 | (7)KRAB(45)~(104)zf-H2C2_2(125)~(114)zf-C2H2(136)~(156)zf-H2C2_2(181)~(170)zf-C2H2(192)~(212)zf-H2C2_2(235)~(240)zf-H2C2_2(262)~(268)zf-H2C2_2(291)~(296)zf-H2C2_2(319)~(365)zf-C2H2(387)~(380)zf-H2C2_2(402)~(407)zf-H2C2_2(431)~(421)zf-C2H2(443)~(436)zf-H2C2_2(458)~(464)zf-H2C2_2(488)~(492)zf-H2C2_2(515)~(520)zf-H2C2_2(542)~(548)zf-H2C2_2(572)~(576)zf-H2C2_2(600)~(589)zf-C2H2(611)~(645)zf-C2H2(667)~(660)zf-H2C2_2(682)                                                            |
| Q9Y676 | (112)Ribosomal_S18(163)                                                                                                                                                                                                                                                                                                                                                                                                                                                                        |
| O71037 | (19)HERV-K_REC(105)~(115)HERV-K_env_2(283)~(486)GP41(682)                                                                                                                                                                                                                                                                                                                                                                                                                                      |
| P49642 | (108)DNA_primase_S(335)                                                                                                                                                                                                                                                                                                                                                                                                                                                                        |
| Q9UNX3 | (8)Ribosomal_L26(122)                                                                                                                                                                                                                                                                                                                                                                                                                                                                          |
| Q8IU60 | (12)DCP2(94)~(100)NUDIX(208)                                                                                                                                                                                                                                                                                                                                                                                                                                                                   |
| Q8NCV1 | (261)A_deamin(576)                                                                                                                                                                                                                                                                                                                                                                                                                                                                             |
| Q5VTD9 | (163)zf-C2H2(186)~(178)zf-H2C2_2(203)~(220)zf-C2H2(242)~(263)zf-H2C2_2(286)~(276)zf-C2H2(298)~(290)zf-H2C2_2(313)                                                                                                                                                                                                                                                                                                                                                                              |
| Q9BRR0 | (43)SCAN(130)~(216)KRAB(253)~(329)zf-H2C2_2(351)~(356)zf-H2C2_2(381)~(385)zf-H2C2_2(408)~(412)zf-H2C2_2(436)~(426)zf-C2H2(448)~(495)zf-H2C2_2(519)                                                                                                                                                                                                                                                                                                                                             |
| Q9NRS4 | (109)SRCR_2(199)~(206)Trypsin(429)                                                                                                                                                                                                                                                                                                                                                                                                                                                             |
| Q2M3W8 | (4)KRAB(43)~(237)zf-C2H2(259)~(252)zf-H2C2_2(276)~(279)zf-H2C2_2(304)~(307)zf-H2C2_2(332)~(336)zf-H2C2_2(359)~(367)zf-H2C2_2(386)~(391)zf-H2C2_2(416)~(420)zf-H2C2_2(443)~(447)zf-H2C2_2(472)~(475)zf-H2C2_2(499)~(503)zf-H2C2_2(527)                                                                                                                                                                                                                                                          |
| Q9BXR3 | (76)RVT_1(245)~(252)RVT_thumb(316)~(462)RNase_H(588)~(592)Integrase_Zn(629)~(646)rve(755)                                                                                                                                                                                                                                                                                                                                                                                                      |
| Q5JVS0 | (16)IHABP4_N(163)~(212)HABP4_PAI-RBP1(315)                                                                                                                                                                                                                                                                                                                                                                                                                                                     |
| P16157 | (18)Ank_2(107)~(78)Ank_4(131)~(210)Ank_2(301)~(276)Ank_2(367)~(357)Ank_5(411)~(441)Ank_2(527)~(474)Ank_2(564)~(574)Ank_2(663)~(668)Ank_4(721)~(705)Ank_2(784)~(913)ZU5(1011)~(1075)ZU5(1150)~(1407)Death(1484)                                                                                                                                                                                                                                                                                 |
| Q9NQZ2 | (231)Sas10_Utp3(310)~(406)Sas10(478)                                                                                                                                                                                                                                                                                                                                                                                                                                                           |
| O00571 | (204)DEAD(391)~(426)Helicase_C(536)                                                                                                                                                                                                                                                                                                                                                                                                                                                            |
| Q9Y4L5 | (227)zf-RING_2(269)                                                                                                                                                                                                                                                                                                                                                                                                                                                                            |
| P06313 | (26)V-set(131)                                                                                                                                                                                                                                                                                                                                                                                                                                                                                 |

|        |                                                                                                                                                                                                                                                                                                                                                                                                                                                                        |
|--------|------------------------------------------------------------------------------------------------------------------------------------------------------------------------------------------------------------------------------------------------------------------------------------------------------------------------------------------------------------------------------------------------------------------------------------------------------------------------|
| P51513 | (53)KH_1(114)~(177)KH_1(240)~(427)KH_1(491)                                                                                                                                                                                                                                                                                                                                                                                                                            |
| Q9UJV9 | (205)DEAD(384)~(419)Helicase_C(527)                                                                                                                                                                                                                                                                                                                                                                                                                                    |
| Q96K58 | (84)zf-C2H2(106)~(99)zf-H2C2_2(121)~(112)zf-C2H2(134)~(155)zf-H2C2_2(178)~(168)zf-C2H2(190)~(210)zf-H2C2_2(235)~(238)zf-H2C2_2(262)~(267)zf-H2C2_2(290)~(295)zf-H2C2_2(318)~(323)zf-H2C2_2(346)~(350)zf-H2C2_2(374)~(378)zf-H2C2_2(402)~(531)zf-H2C2_2(554)~(558)zf-H2C2_2(582)                                                                                                                                                                                        |
| Q8N163 | (55)S1-like(112)~(340)DBC1(451)                                                                                                                                                                                                                                                                                                                                                                                                                                        |
| Q6XE24 | (63)RRM_1(122)~(142)RRM_1(206)                                                                                                                                                                                                                                                                                                                                                                                                                                         |
| Q6PIY7 | (386)PAP_assoc(440)                                                                                                                                                                                                                                                                                                                                                                                                                                                    |
| Q6SJ96 | (201)TBP(280)~(289)TBP(370)                                                                                                                                                                                                                                                                                                                                                                                                                                            |
| P10323 | (43)Trypsin(285)                                                                                                                                                                                                                                                                                                                                                                                                                                                       |
| O43390 | (167)RRM_1(231)~(248)RRM_1(309)~(343)RRM_1(404)                                                                                                                                                                                                                                                                                                                                                                                                                        |
| B9A064 | (122)C1-set(203)                                                                                                                                                                                                                                                                                                                                                                                                                                                       |
| Q9NYV4 | (729)Pkinase(1020)                                                                                                                                                                                                                                                                                                                                                                                                                                                     |
| Q9Y2I8 | (147)WD40(185)~(189)WD40(226)~(314)WD40(351)~(360)WD40(394)                                                                                                                                                                                                                                                                                                                                                                                                            |
| Q7Z4W2 | (20)Lys(145)                                                                                                                                                                                                                                                                                                                                                                                                                                                           |
| P26640 | (123)GST_C(198)~(309)tRNA-synt_1(939)~(984)Anticodon_1(1131)                                                                                                                                                                                                                                                                                                                                                                                                           |
| P01779 | (12)V-set(115)                                                                                                                                                                                                                                                                                                                                                                                                                                                         |
| Q7Z2Q7 | (86)LRR_8(143)~(133)LRR_8(192)~(160)LRR_8(216)~(229)LRR_8(288)~(326)LRR_1(346)                                                                                                                                                                                                                                                                                                                                                                                         |
| Q9BXA9 | (434)zf-H2C2_2(459)~(693)zf-H2C2_2(718)~(707)zf-C2H2(729)~(739)zf-C2H2(761)~(991)zf-H2C2_2(1016)~(1127)zf-H2C2_2(1152)                                                                                                                                                                                                                                                                                                                                                 |
| P01859 | (14)C1-set(93)~(126)C1-set(212)~(232)C1-set(314)                                                                                                                                                                                                                                                                                                                                                                                                                       |
| Q8TEB7 | (276)zf-RING_2(318)                                                                                                                                                                                                                                                                                                                                                                                                                                                    |
| Q9Y6U7 | (323)zf-RING_2(366)                                                                                                                                                                                                                                                                                                                                                                                                                                                    |
| P01764 | (31)V-set(116)                                                                                                                                                                                                                                                                                                                                                                                                                                                         |
| A6NEY8 | (26)tRNA_edit(155)                                                                                                                                                                                                                                                                                                                                                                                                                                                     |
| Q68DV7 | (271)zf-RING_2(312)                                                                                                                                                                                                                                                                                                                                                                                                                                                    |
| P63162 | (10)LSM(81)                                                                                                                                                                                                                                                                                                                                                                                                                                                            |
| Q12851 | (16)Pkinase(272)~(492)CNH(789)                                                                                                                                                                                                                                                                                                                                                                                                                                         |
| Q96BP3 | (495)Pro_isomerase(644)                                                                                                                                                                                                                                                                                                                                                                                                                                                |
| Q15928 | (4)KRAB(44)~(185)zf-H2C2_2(209)~(215)zf-H2C2_2(238)~(242)zf-H2C2_2(265)~(270)zf-H2C2_2(293)~(297)zf-H2C2_2(321)~(326)zf-H2C2_2(349)~(354)zf-H2C2_2(377)~(382)zf-H2C2_2(405)~(411)zf-H2C2_2(434)~(438)zf-H2C2_2(462)                                                                                                                                                                                                                                                    |
| P78363 | (610)ABC2_membrane_3(856)~(947)ABC_tran(1090)~(1604)ABC2_membrane_3(1895)~(1957)ABC_tran(2098)                                                                                                                                                                                                                                                                                                                                                                         |
| P57737 | (4)DUF1899(63)~(70)WD40(105)~(338)WD40_4(379)~(470)DUF1899(531)~(588)WD40(623)~(633)WD40(664)~(808)WD40_4(852)                                                                                                                                                                                                                                                                                                                                                         |
| Q13838 | (70)DEAD(235)~(275)Helicase_C(382)                                                                                                                                                                                                                                                                                                                                                                                                                                     |
| P10072 | (33)KRAB(72)~(116)zf-C2H2_11(134)~(301)zf-C2H2(323)~(315)zf-H2C2_2(339)~(343)zf-H2C2_2(367)~(371)zf-H2C2_2(395)~(399)zf-H2C2_2(423)~(427)zf-H2C2_2(451)~(455)zf-H2C2_2(479)~(483)zf-H2C2_2(508)~(512)zf-H2C2_2(535)~(542)zf-H2C2_2(563)~(594)zf-H2C2_2(617)~(607)zf-C2H2(629)~(621)zf-H2C2_2(645)~(635)zf-C2H2(657)                                                                                                                                                    |
| P01770 | (11)V-set(117)                                                                                                                                                                                                                                                                                                                                                                                                                                                         |
| Q9UII5 | (104)zf-C2H2(126)~(119)zf-H2C2_2(141)~(147)zf-H2C2_2(170)~(160)zf-C2H2(182)~(175)zf-H2C2_2(199)~(202)zf-H2C2_2(226)~(244)zf-C2H2(266)~(258)zf-H2C2_2(281)~(315)zf-H2C2_2(338)~(328)zf-C2H2(350)~(343)zf-H2C2_2(366)~(370)zf-H2C2_2(394)~(412)zf-C2H2(434)~(427)zf-H2C2_2(450)~(454)zf-H2C2_2(478)~(483)zf-H2C2_2(506)~(496)zf-C2H2(518)~(541)zf-H2C2_2(556)~(608)zf-C2H2(630)~(622)zf-H2C2_2(646)~(651)zf-H2C2_2(673)~(679)zf-H2C2_2(702)~(706)zf-H2C2_2(730)~(720)zf- |

|        |                                                                                                                                                                                                                                                                                                                                                                            |
|--------|----------------------------------------------------------------------------------------------------------------------------------------------------------------------------------------------------------------------------------------------------------------------------------------------------------------------------------------------------------------------------|
|        | C2H2(742)~(762)zf-H2C2_2(780)                                                                                                                                                                                                                                                                                                                                              |
| Q8N6W0 | (47)RRM_1(114)~(136)RRM_1(198)~(402)RRM_1(472)                                                                                                                                                                                                                                                                                                                             |
| Q8NA23 | (95)WD40(131)~(139)WD40(174)~(271)WD40(310)                                                                                                                                                                                                                                                                                                                                |
| Q9Y535 | (9)SHS2_Rpb7-N(77)~(79)RNA_pol_Rbc25(201)                                                                                                                                                                                                                                                                                                                                  |
| Q8NHY6 | (103)KRAB(143)~(232)KRAB(268)~(420)zf-C2H2(442)~(434)zf-H2C2_2(458)~(463)zf-H2C2_2(485)~(491)zf-H2C2_2(515)~(520)zf-H2C2_2(543)~(547)zf-H2C2_2(572)~(575)zf-H2C2_2(599)~(603)zf-H2C2_2(627)~(632)zf-H2C2_2(656)~(659)zf-H2C2_2(683)~(688)zf-H2C2_2(710)~(717)zf-H2C2_2(740)~(745)zf-H2C2_2(768)~(771)zf-H2C2_2(794)~(785)zf-C2H2(807)                                      |
| O15439 | (94)ABC_membrane(358)~(428)ABC_tran(562)~(715)ABC_membrane(991)~(1058)ABC_t<br>ran(1205)                                                                                                                                                                                                                                                                                   |
| O95551 | (117)Exo_endo_phos(351)                                                                                                                                                                                                                                                                                                                                                    |
| Q9Y4F3 | (353)NYN(490)~(510)Limkain-b1(594)~(1101)OST-HTH(1159)~(1177)OST-<br>HTH(1233)~(1260)OST-HTH(1327)~(1337)OST-HTH(1404)~(1410)OST-<br>HTH(1472)~(1488)OST-HTH(1556)                                                                                                                                                                                                         |
| Q8WXF0 | (12)RRM_1(81)                                                                                                                                                                                                                                                                                                                                                              |
| Q9H8G1 | (35)KRAB(74)~(198)zf-H2C2_2(214)~(219)zf-H2C2_2(242)~(248)zf-<br>H2C2_2(272)~(276)zf-H2C2_2(299)~(303)zf-H2C2_2(327)~(331)zf-H2C2_2(355)~(360)zf-<br>H2C2_2(383)~(388)zf-H2C2_2(410)~(416)zf-H2C2_2(439)~(443)zf-H2C2_2(467)~(472)zf-<br>H2C2_2(495)~(485)zf-C2H2(507)~(528)zf-H2C2_2(551)                                                                                 |
| Q9H116 | (22)BTB(130)~(362)zf-H2C2_2(388)~(421)zf-H2C2_2(445)~(449)zf-<br>H2C2_2(473)~(478)zf-H2C2_2(501)~(506)zf-H2C2_2(529)~(533)zf-H2C2_2(557)~(561)zf-<br>H2C2_2(585)                                                                                                                                                                                                           |
| P63119 | (7)RVP(105)~(112)G-patch(154)                                                                                                                                                                                                                                                                                                                                              |
| P62633 | (5)zf-CCHC(20)~(53)zf-CCHC(68)~(73)zf-CCHC(89)~(97)zf-CCHC(113)~(117)zf-<br>CCHC(134)~(136)zf-CCHC(152)~(157)zf-CCHC(172)                                                                                                                                                                                                                                                  |
| O95382 | (129)DUF4071(507)~(653)Pkinase(906)                                                                                                                                                                                                                                                                                                                                        |
| Q8N7Q3 | (184)zf-H2C2_2(207)~(212)zf-H2C2_2(235)~(240)zf-H2C2_2(264)~(268)zf-<br>H2C2_2(290)~(296)zf-H2C2_2(319)~(323)zf-H2C2_2(347)~(352)zf-H2C2_2(375)~(380)zf-<br>H2C2_2(402)~(408)zf-H2C2_2(431)~(435)zf-H2C2_2(459)~(464)zf-H2C2_2(488)~(492)zf-<br>H2C2_2(515)~(520)zf-H2C2_2(544)~(547)zf-H2C2_2(572)                                                                        |
| P00738 | (162)Trypsin(399)                                                                                                                                                                                                                                                                                                                                                          |
| Q15831 | (53)Pkinase(309)                                                                                                                                                                                                                                                                                                                                                           |
| P04433 | (26)V-set(110)                                                                                                                                                                                                                                                                                                                                                             |
| Q00537 | (192)Pkinase(473)                                                                                                                                                                                                                                                                                                                                                          |
| Q86U44 | (389)MT-A70(550)                                                                                                                                                                                                                                                                                                                                                           |
| Q8NDF8 | (146)NTP_transf_2(254)~(308)PAP_assoc(368)                                                                                                                                                                                                                                                                                                                                 |
| Q9HBX8 | (92)LRR_8(150)~(188)LRR_8(246)~(258)LRR_8(314)~(375)LRR_8(434)                                                                                                                                                                                                                                                                                                             |
| Q9UHK0 | (216)NUFIP1(267)                                                                                                                                                                                                                                                                                                                                                           |
| O75525 | (4)Qual(55)~(266)Sam68-YY(320)                                                                                                                                                                                                                                                                                                                                             |
| P08217 | (29)Trypsin(262)                                                                                                                                                                                                                                                                                                                                                           |
| Q06732 | (12)KRAB(52)~(329)zf-C2H2(351)~(343)zf-H2C2_2(367)~(371)zf-H2C2_2(396)~(399)zf-<br>H2C2_2(423)~(427)zf-H2C2_2(450)~(455)zf-H2C2_2(478)~(483)zf-H2C2_2(508)~(512)zf-<br>H2C2_2(534)~(539)zf-H2C2_2(564)~(568)zf-H2C2_2(592)~(596)zf-H2C2_2(618)~(624)zf-<br>H2C2_2(646)~(652)zf-H2C2_2(674)~(683)zf-H2C2_2(704)~(693)zf-C2H2(715)~(735)zf-<br>H2C2_2(759)~(749)zf-C2H2(771) |
| Q8NAF0 | (59)zf-H2C2_2(82)~(72)zf-C2H2(94)~(101)zf-C2H2_4(123)~(270)zf-C2H2(292)~(284)zf-<br>H2C2_2(307)~(298)zf-C2H2(320)~(386)zf-C2H2(406)~(412)zf-C2H2(434)~(426)zf-<br>H2C2_2(452)                                                                                                                                                                                              |
| P01854 | (21)C1-set(92)~(133)C1-set(201)~(232)C1-set(308)~(335)C1-set(413)                                                                                                                                                                                                                                                                                                          |
| Q7Z3Z4 | (275)PAZ(405)~(546)Piwi(838)                                                                                                                                                                                                                                                                                                                                               |
| Q3ZCX4 | (48)KRAB(88)~(222)zf-C2H2(244)~(237)zf-H2C2_2(261)~(264)zf-H2C2_2(287)~(292)zf-<br>H2C2_2(316)~(320)zf-H2C2_2(344)~(348)zf-H2C2_2(373)~(379)zf-H2C2_2(400)~(408)zf-                                                                                                                                                                                                        |

|        |                                                                                                                                                                                                                                                                                                |
|--------|------------------------------------------------------------------------------------------------------------------------------------------------------------------------------------------------------------------------------------------------------------------------------------------------|
|        | H2C2_2(428)~(432)zf-H2C2_2(457)~(460)zf-H2C2_2(483)~(488)zf-H2C2_2(512)~(516)zf-H2C2_2(540)~(544)zf-H2C2_2(569)~(572)zf-H2C2_2(596)~(603)zf-H2C2_2(624)                                                                                                                                        |
| Q5F1R6 | (4)DnaJ(66)~(314)zf-C2H2_jaz(339)                                                                                                                                                                                                                                                              |
| O75643 | (483)DEAD(658)~(720)Helicase_C(859)~(982)Sec63(1284)~(1330)DEAD(1496)~(1554)Helicase_C(1667)~(1812)Sec63(2123)                                                                                                                                                                                 |
| Q8NB46 | (12)Ank_2(104)~(140)Ank_4(193)~(177)Ank_2(267)~(276)Ank_2(366)~(423)Ank_4(472)~(532)Ank_2(615)~(653)Ank_4(708)~(729)Ank_2(813)~(827)Ank_2(919)~(891)Ank_4(943)~(926)Ank_4(981)                                                                                                                 |
| Q99973 | (1)TEP1_N(29)~(31)TEP1_N(59)~(61)TEP1_N(89)~(91)TEP1_N(119)~(226)TROVE(676)~(900)DUF4062(1009)~(1162)NACHT(1335)~(2053)WD40(2089)~(2099)WD40(2134)~(2140)WD40(2174)~(2231)WD40(2265)                                                                                                           |
| O00187 | (28)CUB(133)~(184)CUB(293)~(300)Sushi(361)~(366)Sushi(422)~(445)Trypsin(679)                                                                                                                                                                                                                   |
| Q5XG87 | (245)NTP_transf_2(352)~(408)PAP_assoc(466)                                                                                                                                                                                                                                                     |
| P13682 | (222)zf-C2H2(244)~(236)zf-H2C2_2(259)~(264)zf-H2C2_2(289)~(278)zf-C2H2(300)~(306)zf-C2H2(328)~(334)zf-C2H2(356)~(376)zf-H2C2_2(400)~(405)zf-H2C2_2(428)~(418)zf-C2H2(440)~(461)zf-H2C2_2(484)~(474)zf-C2H2(496)~(488)zf-H2C2_2(511)                                                            |
| Q96Q27 | (60)Ank_4(109)~(130)Ank_2(220)~(222)Ank_3(250)~(260)Ank_2(348)~(364)Ank_2(421)~(545)SOCS_box(583)                                                                                                                                                                                              |
| P04211 | (26)V-set(111)                                                                                                                                                                                                                                                                                 |
| Q8WW36 | (7)zf-CCHC(20)~(66)zf-CCHC(81)~(90)zf-CCHC(105)~(110)zf-CCHC(127)~(129)zf-CCHC(145)                                                                                                                                                                                                            |
| O00444 | (13)Pkinase(265)                                                                                                                                                                                                                                                                               |
| Q9UKV8 | (28)ArgoN(166)~(176)ArgoL1(226)~(245)PAZ(365)~(375)ArgoL2(420)~(429)ArgoMid(510)~(518)Piwi(817)                                                                                                                                                                                                |
| Q9H0K1 | (20)Pkinase(271)                                                                                                                                                                                                                                                                               |
| P14868 | (176)tRNA-synt_2(494)                                                                                                                                                                                                                                                                          |
| P00736 | (26)CUB(126)~(160)FXa_inhibition(189)~(193)CUB(302)~(309)Sushi(371)~(376)Sushi(447)~(464)Trypsin(697)                                                                                                                                                                                          |
| Q9NTK5 | (24)MMR_HSR1(136)~(305)YchF-GTPase_C(388)                                                                                                                                                                                                                                                      |
| Q9BUB4 | (63)A_deamin(495)                                                                                                                                                                                                                                                                              |
| Q6ZS27 | (207)zf-H2C2_2(230)~(238)zf-H2C2_2(258)~(262)zf-H2C2_2(286)~(290)zf-H2C2_2(315)~(318)zf-H2C2_2(341)~(346)zf-H2C2_2(369)~(374)zf-H2C2_2(398)                                                                                                                                                    |
| Q9BYD2 | (95)Ribosomal_L9_N(139)                                                                                                                                                                                                                                                                        |
| Q99848 | (20)Ebp2(298)                                                                                                                                                                                                                                                                                  |
| Q8N5S9 | (128)Pkinase(409)                                                                                                                                                                                                                                                                              |
| Q9P0L1 | (51)SCAN(136)~(231)KRAB(270)~(383)zf-C2H2(405)~(401)zf-H2C2_2(421)~(428)zf-H2C2_2(450)~(454)zf-H2C2_2(478)~(482)zf-H2C2_2(504)~(509)zf-H2C2_2(532)~(538)zf-H2C2_2(562)~(567)zf-H2C2_2(589)~(595)zf-H2C2_2(616)~(623)zf-H2C2_2(645)~(650)zf-H2C2_2(674)~(677)zf-H2C2_2(701)~(708)zf-H2C2_2(729) |
| Q9Y2X3 | (2)NOP5NT(66)~(168)Nop(396)                                                                                                                                                                                                                                                                    |
| Q6NTF7 | (26)APOBEC_N(178)                                                                                                                                                                                                                                                                              |
| Q14520 | (77)EGF(106)~(115)EGF(145)~(154)EGF(185)~(194)Kringle(276)~(314)Trypsin(550)                                                                                                                                                                                                                   |
| A0AV96 | (73)RRM_1(137)~(153)RRM_1(214)~(248)RRM_1(311)                                                                                                                                                                                                                                                 |
| Q9NQV6 | (357)zf-C2H2_jaz(377)~(380)Tristanin_u2(510)~(530)zf-C2H2(552)~(530)zf-C2H2_4(552)~(561)zf-C2H2_jaz(580)~(616)zf-C2H2(639)~(632)zf-H2C2_2(653)~(644)zf-C2H2(666)~(673)zf-C2H2(695)~(727)zf-C2H2(750)~(772)zf-C2H2(795)~(835)zf-C2H2_4(857)                                                     |
| P62873 | (47)WD40(83)~(98)WD40(125)~(137)WD40(170)~(174)WD40(212)~(217)WD40(254)~(260)WD40(298)~(307)WD40(340)                                                                                                                                                                                          |
| Q9Y2R4 | (189)DEAD(361)~(399)Helicase_C(507)                                                                                                                                                                                                                                                            |
| Q8NE71 | (321)ABC_tran(480)~(642)ABC_tran(771)                                                                                                                                                                                                                                                          |
| Q6ZN16 | (136)DUF4071(514)~(657)Pkinase(907)                                                                                                                                                                                                                                                            |

|        |                                                                                                                                                                                                                                                                          |
|--------|--------------------------------------------------------------------------------------------------------------------------------------------------------------------------------------------------------------------------------------------------------------------------|
| Q499Z4 | (14)zf-C2H2(36)~(42)zf-C2H2(64)~(56)zf-H2C2_2(81)~(114)zf-H2C2_2(138)~(163)zf-C2H2(185)~(214)zf-H2C2_2(237)~(242)zf-H2C2_2(265)~(270)zf-H2C2_2(293)~(297)zf-H2C2_2(321)~(325)zf-H2C2_2(349)~(353)zf-H2C2_2(377)~(383)zf-H2C2_2(406)                                      |
| Q7Z398 | (12)KRAB(52)~(203)zf-C2H2(225)~(218)zf-H2C2_2(241)~(246)zf-H2C2_2(270)~(274)zf-H2C2_2(298)~(304)zf-H2C2_2(326)~(330)zf-H2C2_2(352)~(359)zf-H2C2_2(381)~(388)zf-H2C2_2(410)                                                                                               |
| Q8NE35 | (440)RRM_7(529)~(551)RRM_1(609)~(622)CEBP_ZZ(684)                                                                                                                                                                                                                        |
| P01768 | (12)V-set(120)                                                                                                                                                                                                                                                           |
| A6NDE4 | (10)RRM_1(79)~(174)RBM1CTR(218)                                                                                                                                                                                                                                          |
| Q86TN4 | (26)PTS_2-RNA(203)                                                                                                                                                                                                                                                       |
| Q6PJI9 | (99)WD40(134)~(188)WD40(220)~(922)Zn_ribbon_17(971)                                                                                                                                                                                                                      |
| Q8N568 | (90)DCX(152)~(215)DCX(274)~(394)Pkinase(651)                                                                                                                                                                                                                             |
| Q96EH5 | (9)Ribosomal_L39(49)                                                                                                                                                                                                                                                     |
| Q96BK5 | (27)G-patch(69)                                                                                                                                                                                                                                                          |
| Q9NWB1 | (120)RRM_1(186)~(253)Fox-1_C(342)                                                                                                                                                                                                                                        |
| Q9UKR3 | (38)Trypsin(258)                                                                                                                                                                                                                                                         |
| Q92630 | (222)Pkinase(535)                                                                                                                                                                                                                                                        |
| Q9UBB9 | (18)TIP_N(107)~(149)G-patch(192)~(397)GCFC(666)                                                                                                                                                                                                                          |
| Q9UL59 | (3)KRAB(42)~(303)zf-C2H2(325)~(348)zf-H2C2_2(368)~(376)zf-H2C2_2(396)~(414)zf-C2H2(436)~(428)zf-H2C2_2(453)~(456)zf-H2C2_2(480)~(488)zf-H2C2_2(508)~(512)zf-H2C2_2(537)~(543)zf-H2C2_2(565)~(554)zf-C2H2(576)                                                            |
| O14896 | (9)IRF(114)~(224)IRF-3(406)                                                                                                                                                                                                                                              |
| P01777 | (12)V-set(101)                                                                                                                                                                                                                                                           |
| Q00978 | (11)IRF(114)~(218)IRF-3(381)                                                                                                                                                                                                                                             |
| Q8N954 | (70)G-patch(113)~(206)DUF4187(258)                                                                                                                                                                                                                                       |
| Q7L945 | (4)KRAB(44)~(115)zf-H2C2_2(128)~(147)zf-H2C2_2(176)~(183)zf-H2C2_2(205)~(210)zf-H2C2_2(233)~(239)zf-H2C2_2(261)~(267)zf-H2C2_2(288)~(294)zf-H2C2_2(315)~(322)zf-H2C2_2(344)~(350)zf-H2C2_2(373)~(378)zf-H2C2_2(402)~(406)zf-H2C2_2(430)~(419)zf-C2H2(441)                |
| Q92620 | (736)Helicase_C(861)~(925)HA2(1011)~(1053)OB_NTP_bind(1146)                                                                                                                                                                                                              |
| O60783 | (75)Ribosomal_S14(126)                                                                                                                                                                                                                                                   |
| A1L020 | (134)KH_1(193)~(225)KH_1(284)~(468)zf-C3HC4_3(510)                                                                                                                                                                                                                       |
| Q8TF39 | (49)SCAN(136)~(171)KRAB(209)~(439)zf-C2H2(461)~(453)zf-H2C2_2(477)~(485)zf-H2C2_2(505)~(509)zf-H2C2_2(533)~(523)zf-C2H2(545)~(538)zf-H2C2_2(562)~(565)zf-H2C2_2(589)~(594)zf-H2C2_2(618)~(624)zf-H2C2_2(645)~(650)zf-H2C2_2(673)~(677)zf-H2C2_2(702)~(706)zf-H2C2_2(730) |
| B4E2M5 | (63)Ank_2(128)~(100)Ank_4(152)                                                                                                                                                                                                                                           |
| Q9UKR0 | (22)Trypsin(241)                                                                                                                                                                                                                                                         |
| O60381 | (215)AXH(339)~(435)HMG_box(499)                                                                                                                                                                                                                                          |
| P10073 | (45)SCAN(132)~(282)zf-H2C2_2(307)~(310)zf-H2C2_2(335)~(338)zf-H2C2_2(363)~(366)zf-H2C2_2(390)~(394)zf-H2C2_2(418)~(423)zf-H2C2_2(446)~(451)zf-H2C2_2(475)                                                                                                                |
| Q08211 | (5)dsrm(69)~(181)dsrm(250)~(638)Helicase_C(768)~(832)HA2(918)~(959)OB_NTP_bind(1073)                                                                                                                                                                                     |
| Q8NEV1 | (39)Pkinase(324)                                                                                                                                                                                                                                                         |
| Q8TC21 | (7)KRAB(47)~(196)zf-C2H2(217)~(209)zf-H2C2_2(234)~(237)zf-H2C2_2(261)~(253)zf-C2H2(273)~(293)zf-H2C2_2(317)~(322)zf-H2C2_2(346)~(349)zf-H2C2_2(373)~(378)zf-H2C2_2(401)~(405)zf-H2C2_2(430)~(434)zf-H2C2_2(457)~(461)zf-H2C2_2(485)                                      |
| Q03112 | (21)zf-C2H2(41)~(89)zf-H2C2_2(112)~(131)zf-C2H2(154)~(145)zf-H2C2_2(171)~(160)zf-C2H2(182)~(188)zf-C2H2(210)~(218)zf-C2H2(237)~(747)zf-H2C2_2(771)~(761)zf-C2H2(784)~(775)zf-H2C2_2(800)                                                                                 |

|        |                                                                                                                                                                                                                                                                                         |
|--------|-----------------------------------------------------------------------------------------------------------------------------------------------------------------------------------------------------------------------------------------------------------------------------------------|
| P45984 | (26)Pkinase(321)                                                                                                                                                                                                                                                                        |
| Q9NWX6 | (35)Thg1(164)~(167)Thg1C(282)                                                                                                                                                                                                                                                           |
| Q8N7X1 | (10)RRM_1(79)                                                                                                                                                                                                                                                                           |
| O15335 | (75)LRR_8(134)~(148)LRR_8(207)~(157)LRR_5(270)~(245)LRR_8(300)                                                                                                                                                                                                                          |
| A6NGH8 | (79)Ank_5(114)~(169)Ank_4(221)~(190)Ank_2(275)~(258)Ank_4(298)                                                                                                                                                                                                                          |
| Q15935 | (4)KRAB(44)~(228)zf-H2C2_2(249)~(240)zf-C2H2(262)~(255)zf-H2C2_2(278)~(283)zf-H2C2_2(306)~(311)zf-H2C2_2(334)~(338)zf-H2C2_2(362)~(366)zf-H2C2_2(390)~(395)zf-H2C2_2(418)~(422)zf-H2C2_2(446)~(450)zf-H2C2_2(475)~(479)zf-H2C2_2(502)~(506)zf-H2C2_2(530)                               |
| O43592 | (99)Xpo1(247)                                                                                                                                                                                                                                                                           |
| Q86T26 | (45)SEA(143)~(185)Trypsin(410)                                                                                                                                                                                                                                                          |
| P49411 | (55)GTP_EFTU(248)~(272)GTP_EFTU_D2(339)~(345)GTP_EFTU_D3(439)                                                                                                                                                                                                                           |
| Q01085 | (11)RRM_1(79)~(99)RRM_1(169)~(207)RRM_1(271)                                                                                                                                                                                                                                            |
| Q16560 | (53)RRM_1(122)                                                                                                                                                                                                                                                                          |
| Q12955 | (48)Ank_2(136)~(107)Ank_4(160)~(206)Ank_2(297)~(272)Ank_2(362)~(305)Ank_2(396)~(367)Ank_4(420)~(386)Ank_5(440)~(470)Ank_2(561)~(532)Ank_4(585)~(564)Ank_2(626)~(631)Ank_4(684)~(669)Ank_2(759)~(749)Ank_5(803)~(984)ZU5(1082)~(1146)ZU5(1221)~(4094)Death(4171)                         |
| P00742 | (45)Gla(84)~(235)Trypsin(462)                                                                                                                                                                                                                                                           |
| Q6P1L6 | (62)KRAB(101)~(109)zf-H2C2_5(130)~(269)zf-C2H2(291)~(297)zf-C2H2(319)~(311)zf-H2C2_2(335)~(340)zf-H2C2_2(363)~(370)zf-H2C2_2(390)~(396)zf-H2C2_2(419)~(409)zf-C2H2(431)~(454)zf-H2C2_2(475)~(465)zf-C2H2(487)~(493)zf-C2H2(515)~(538)zf-H2C2_2(559)~(549)zf-C2H2(571)~(577)zf-C2H2(599) |
| P17538 | (34)Trypsin(256)                                                                                                                                                                                                                                                                        |
| Q9P2J5 | (20)tRNA-synt_1(103)~(182)tRNA-synt_1(755)~(794)Anticodon_1(903)                                                                                                                                                                                                                        |
| P00709 | (20)Lys(139)                                                                                                                                                                                                                                                                            |
| Q8TF21 | (130)Ank_2(211)~(200)Ank_5(251)                                                                                                                                                                                                                                                         |
| Q8N7C7 | (100)PA(164)~(257)zf-RING_2(299)                                                                                                                                                                                                                                                        |
| Q9UC07 | (24)KRAB(64)~(173)zf-H2C2_2(201)~(208)zf-H2C2_2(230)~(237)zf-H2C2_2(259)~(263)zf-H2C2_2(286)~(291)zf-H2C2_2(314)~(320)zf-H2C2_2(340)~(347)zf-H2C2_2(369)~(375)zf-H2C2_2(398)~(402)zf-H2C2_2(426)~(430)zf-H2C2_2(454)~(467)zf-H2C2_2(488)~(492)zf-H2C2_2(517)~(521)zf-H2C2_2(543)        |
| P08048 | (74)Zfx_Zfy_act(406)~(421)zf-C2H2(443)~(436)zf-H2C2_2(461)~(485)zf-C2H2(506)~(530)zf-H2C2_2(555)~(544)zf-C2H2(566)~(559)zf-H2C2_2(580)~(586)zf-H2C2_2(611)~(643)zf-H2C2_2(668)~(686)zf-H2C2_5(710)~(701)zf-H2C2_2(725)~(715)zf-C2H2(737)~(730)zf-H2C2_2(752)~(758)zf-H2C2_2(782)        |
| Q9HCJ3 | (71)RRM_1(133)~(144)RRM_1(209)~(235)RRM_1(302)                                                                                                                                                                                                                                          |
| Q01201 | (18)RelB_leu_zip(102)~(127)RHD_DNA_bind(295)~(304)RHD_dimer(400)~(403)RelB_transactiv(579)                                                                                                                                                                                              |
| A6NFN3 | (102)RRM_1(168)~(208)Fox-1_C(297)                                                                                                                                                                                                                                                       |
| P17612 | (44)Pkinase(298)                                                                                                                                                                                                                                                                        |
| Q04864 | (10)RHD_DNA_bind(178)~(187)RHD_dimer(282)                                                                                                                                                                                                                                               |
| P08865 | (19)Ribosomal_S2(112)~(114)Ribosomal_S2(182)~(202)40S_SA_C(295)                                                                                                                                                                                                                         |
| P61218 | (51)RNA_pol_Rpb6(104)                                                                                                                                                                                                                                                                   |
| Q8WWH5 | (106)TruB_N(255)                                                                                                                                                                                                                                                                        |
| O14980 | (46)IBN_N(111)~(124)Xpo1(268)~(709)CRM1_C(1027)                                                                                                                                                                                                                                         |
| P01721 | (5)V-set(111)                                                                                                                                                                                                                                                                           |
| Q8IVF6 | (38)Ank_2(131)~(153)Ank_5(207)~(327)CCDC144C(618)~(865)DUF3496(968)                                                                                                                                                                                                                     |
| Q9BSC4 | (482)NUC153(508)                                                                                                                                                                                                                                                                        |
| Q5T619 | (294)zf-H2C2_2(317)~(323)zf-H2C2_2(345)~(335)zf-C2H2(358)~(378)zf-                                                                                                                                                                                                                      |

|        |                                                                                                                                                                                                                                                                                                                                                                                    |
|--------|------------------------------------------------------------------------------------------------------------------------------------------------------------------------------------------------------------------------------------------------------------------------------------------------------------------------------------------------------------------------------------|
|        | H2C2_2(402)~(408)zf-H2C2_2(430)~(434)zf-H2C2_2(458)~(463)zf-H2C2_2(486)~(476)zf-C2H2(498)~(519)zf-H2C2_2(543)                                                                                                                                                                                                                                                                      |
| Q9Y4Y9 | (17)LSM(84)                                                                                                                                                                                                                                                                                                                                                                        |
| Q96J87 | (48)RRM_1(115)~(136)RRM_1(198)~(398)RRM_1(468)                                                                                                                                                                                                                                                                                                                                     |
| Q9BVJ6 | (31)Utp14(734)                                                                                                                                                                                                                                                                                                                                                                     |
| Q8IZQ1 | (2601)PH_BEACH(2654)~(2696)Beach(2976)~(3450)FYVE(3514)                                                                                                                                                                                                                                                                                                                            |
| Q02750 | (68)Pkinase(361)                                                                                                                                                                                                                                                                                                                                                                   |
| P41238 | (33)APOBEC_N(158)                                                                                                                                                                                                                                                                                                                                                                  |
| Q7L7V1 | (458)HA2(547)~(604)OB_NTP_bind(696)                                                                                                                                                                                                                                                                                                                                                |
| Q9NRX2 | (28)Ribosomal_L17(125)                                                                                                                                                                                                                                                                                                                                                             |
| Q8WXB4 | (62)KRAB(102)~(307)zf-H2C2_2(327)~(417)zf-H2C2_2(439)~(442)zf-H2C2_2(466)~(471)zf-H2C2_2(493)~(502)zf-H2C2_2(522)~(527)zf-H2C2_2(549)~(554)zf-H2C2_2(578)~(583)zf-H2C2_2(605)~(610)zf-H2C2_2(634)~(638)zf-H2C2_2(662)~(666)zf-H2C2_2(690)~(695)zf-H2C2_2(718)~(723)zf-H2C2_2(745)~(752)zf-H2C2_2(774)                                                                              |
| Q14011 | (8)RRM_1(78)                                                                                                                                                                                                                                                                                                                                                                       |
| P52435 | (32)RNA_pol_L_2(103)                                                                                                                                                                                                                                                                                                                                                               |
| P0C7V8 | (462)WD40(497)~(504)WD40(540)                                                                                                                                                                                                                                                                                                                                                      |
| Q9BVC5 | (14)Ashwin(232)                                                                                                                                                                                                                                                                                                                                                                    |
| Q9BRA0 | (44)LSM(113)                                                                                                                                                                                                                                                                                                                                                                       |
| Q9NZM5 | (41)Nop53(445)                                                                                                                                                                                                                                                                                                                                                                     |
| Q9NPC7 | (14)BTB(115)~(316)zf-H2C2_2(341)~(345)zf-H2C2_2(368)~(373)zf-H2C2_2(398)~(401)zf-H2C2_2(425)~(430)zf-H2C2_2(453)~(458)zf-H2C2_2(480)~(486)zf-H2C2_2(509)                                                                                                                                                                                                                           |
| O60841 | (633)GTP_EFTU(843)~(975)IF-2(1069)~(1091)GTP_EFTU_D4(1182)                                                                                                                                                                                                                                                                                                                         |
| Q99676 | (28)KRAB(68)~(237)zf-H2C2_2(261)~(264)zf-H2C2_2(287)~(292)zf-H2C2_2(316)~(320)zf-H2C2_2(344)~(348)zf-H2C2_2(373)~(376)zf-H2C2_2(399)~(407)zf-H2C2_2(428)~(432)zf-H2C2_2(457)~(461)zf-H2C2_2(485)~(488)zf-H2C2_2(513)~(516)zf-H2C2_2(539)~(544)zf-H2C2_2(569)~(573)zf-H2C2_2(596)~(600)zf-H2C2_2(625)~(629)zf-H2C2_2(652)~(656)zf-H2C2_2(681)~(684)zf-H2C2_2(708)~(728)zf-C2H2(748) |
| Q6ZN08 | (5)KRAB(44)~(173)zf-C2H2(195)~(189)zf-H2C2_2(211)~(229)zf-C2H2(251)~(243)zf-H2C2_2(268)~(272)zf-H2C2_2(296)~(299)zf-H2C2_2(322)~(327)zf-H2C2_2(352)~(356)zf-H2C2_2(380)~(383)zf-H2C2_2(408)~(412)zf-H2C2_2(436)~(440)zf-H2C2_2(463)~(467)zf-H2C2_2(491)~(496)zf-H2C2_2(520)~(524)zf-H2C2_2(546)~(537)zf-C2H2(559)                                                                  |
| Q9P2K8 | (21)RWD(134)~(330)Pkinase(539)~(590)Pkinase(658)~(795)Pkinase(999)~(1060)tRNA-synt_His(1381)~(1395)HGTP_anticonodon2(1643)                                                                                                                                                                                                                                                         |
| Q6IMN6 | (628)Caprin-1_C(932)~(999)C1q(1124)                                                                                                                                                                                                                                                                                                                                                |
| Q13112 | (11)WD40(45)~(64)WD40(94)~(121)WD40(157)~(381)CAF-1_p60_C(553)                                                                                                                                                                                                                                                                                                                     |
| O75127 | (176)PPR_2(219)~(248)PPR_2(292)~(303)PPR_2(326)~(522)PPR_2(564)~(567)PPR_2(596)                                                                                                                                                                                                                                                                                                    |
| P62829 | (22)Ribosomal_L14(139)                                                                                                                                                                                                                                                                                                                                                             |
| Q9H1R3 | (287)Pkinase(540)                                                                                                                                                                                                                                                                                                                                                                  |
| O14610 | (7)G-gamma(68)                                                                                                                                                                                                                                                                                                                                                                     |
| Q9BXB1 | (61)LRR_8(117)~(177)LRR_8(237)~(179)LRR_5(297)~(305)LRR_9(426)~(367)LRR_8(425)                                                                                                                                                                                                                                                                                                     |
| Q96PM9 | (75)zf-met(98)~(201)zf-met(225)~(261)zf-met(285)                                                                                                                                                                                                                                                                                                                                   |
| P47897 | (7)tRNA_synt_1c_R1(162)~(165)tRNA_synt_1c_R2(256)~(263)tRNA-synt_1c(562)~(565)tRNA-synt_1c_C(752)                                                                                                                                                                                                                                                                                  |
| P83593 | (6)V-set(107)                                                                                                                                                                                                                                                                                                                                                                      |
| P50613 | (12)Pkinase(295)                                                                                                                                                                                                                                                                                                                                                                   |
| Q8IUH4 | (86)Ank_2(179)~(215)Ank_5(257)~(425)zf-DHHC(557)                                                                                                                                                                                                                                                                                                                                   |
| Q8N283 | (58)Ank_2(147)~(124)Ank_2(215)                                                                                                                                                                                                                                                                                                                                                     |

|        |                                                                                                                                                                                                                                                                                                                       |
|--------|-----------------------------------------------------------------------------------------------------------------------------------------------------------------------------------------------------------------------------------------------------------------------------------------------------------------------|
| Q96PU8 | (10)STAR_dimer(68)~(312)Quaking_NLS(341)                                                                                                                                                                                                                                                                              |
| Q9BXR0 | (142)TGT(376)                                                                                                                                                                                                                                                                                                         |
| O60516 | (14)eIF_4EBP(100)                                                                                                                                                                                                                                                                                                     |
| Q9HCJ2 | (90)LRR_5(205)~(244)LRR_8(302)~(354)I-set(443)                                                                                                                                                                                                                                                                        |
| Q6UWB4 | (68)Trypsin(295)                                                                                                                                                                                                                                                                                                      |
| Q9H8X2 | (13)Ins_P5_2-kin(456)                                                                                                                                                                                                                                                                                                 |
| Q64LD2 | (238)WD40(277)~(466)WD40(500)                                                                                                                                                                                                                                                                                         |
| Q6S8J3 | (143)Ank_2(235)~(225)Ank_5(276)~(292)Ank_5(345)~(648)CCDC144C(701)~(703)Actin(1075)                                                                                                                                                                                                                                   |
| Q03936 | (4)KRAB(44)~(166)zf-H2C2_2(182)~(188)zf-H2C2_2(210)~(216)zf-H2C2_2(239)~(243)zf-H2C2_2(267)~(272)zf-H2C2_2(295)~(300)zf-H2C2_2(322)~(328)zf-H2C2_2(351)~(355)zf-H2C2_2(379)~(384)zf-H2C2_2(408)~(412)zf-H2C2_2(435)~(440)zf-H2C2_2(463)~(468)zf-H2C2_2(491)~(481)zf-C2H2(503)~(497)zf-H2C2_2(519)~(532)zf-H2C2_2(547) |
| P51116 | (13)Agenet(63)~(72)Agenet(129)~(231)KH_1(287)~(295)KH_1(361)~(364)FXMRP1_C_core(491)~(503)FXR_C1(577)                                                                                                                                                                                                                 |
| P46734 | (66)Pkinase(325)                                                                                                                                                                                                                                                                                                      |
| Q9NQU5 | (11)PBD(63)~(411)Pkinase(658)                                                                                                                                                                                                                                                                                         |
| Q9BRP4 | (90)WD40(119)~(125)WD40(162)~(167)WD40(204)                                                                                                                                                                                                                                                                           |
| Q9P2R3 | (60)BTB(156)~(293)Ank_2(397)~(462)Ank_2(568)~(613)Ank_5(662)~(729)Ank_2(832)~(875)Ank_2(968)~(910)Ank_2(997)~(1108)FYVE(1163)                                                                                                                                                                                         |
| Q86XP3 | (277)DEAD(448)~(491)Helicase_C(593)                                                                                                                                                                                                                                                                                   |
| Q15427 | (15)RRM_1(85)~(102)RRM_1(172)                                                                                                                                                                                                                                                                                         |
| P62888 | (13)Ribosomal_L7Ae(105)                                                                                                                                                                                                                                                                                               |
| Q96Q11 | (59)PolyA_pol(182)~(216)PolyA_pol_RNAAbd(267)                                                                                                                                                                                                                                                                         |
| Q8IW41 | (25)Pkinase(304)                                                                                                                                                                                                                                                                                                      |
| O75529 | (63)TFIID_NTD2(195)~(334)WD40(370)~(380)WD40(412)~(418)WD40(454)~(459)WD40(496)~(504)WD40(538)                                                                                                                                                                                                                        |
| Q6ZSG1 | (293)zf-RING_2(335)                                                                                                                                                                                                                                                                                                   |
| P49863 | (27)Trypsin(254)                                                                                                                                                                                                                                                                                                      |
| Q9Y2P0 | (111)zf-C2H2(132)~(128)zf-H2C2_2(148)~(152)zf-H2C2_2(176)~(181)zf-H2C2_2(205)~(208)zf-H2C2_2(233)~(237)zf-H2C2_2(259)~(265)zf-H2C2_2(288)~(292)zf-H2C2_2(316)~(321)zf-H2C2_2(345)~(348)zf-H2C2_2(373)~(362)zf-C2H2(384)~(405)zf-H2C2_2(428)~(433)zf-H2C2_2(457)~(463)zf-H2C2_2(484)                                   |
| P09543 | (186)CNPase(420)                                                                                                                                                                                                                                                                                                      |
| Q15306 | (23)IRF(128)~(250)IRF-3(417)                                                                                                                                                                                                                                                                                          |
| O75691 | (911)DRIM(1533)                                                                                                                                                                                                                                                                                                       |
| O00425 | (4)RRM_1(68)~(85)RRM_1(150)~(198)KH_1(260)~(280)KH_1(343)~(408)KH_1(470)~(491)KH_1(553)                                                                                                                                                                                                                               |
| Q9NQZ8 | (145)zf-H2C2_2(167)~(172)zf-H2C2_2(196)~(200)zf-H2C2_2(224)~(228)zf-H2C2_2(252)~(257)zf-H2C2_2(280)~(284)zf-H2C2_2(308)~(312)zf-H2C2_2(336)~(343)zf-H2C2_2(364)~(368)zf-H2C2_2(392)~(397)zf-H2C2_2(420)~(425)zf-H2C2_2(447)~(452)zf-H2C2_2(477)                                                                       |
| Q13177 | (73)PBD(130)~(249)Pkinase(500)                                                                                                                                                                                                                                                                                        |
| P01594 | (6)V-set(106)                                                                                                                                                                                                                                                                                                         |
| Q15661 | (31)Trypsin(267)                                                                                                                                                                                                                                                                                                      |
| Q13148 | (106)RRM_1(164)~(193)RRM_1(241)                                                                                                                                                                                                                                                                                       |
| Q9HC98 | (45)Pkinase(296)                                                                                                                                                                                                                                                                                                      |
| Q96JA1 | (71)LRR_8(104)~(116)LRR_8(175)~(146)LRR_5(258)~(236)LRR_8(295)~(308)LRR_8(367)~(383)LRR_8(440)~(495)I-set(595)~(599)I-set(689)~(694)I-set(780)                                                                                                                                                                        |
| Q9P0K7 | (23)Ank_2(109)~(117)Ank_2(182)~(171)Ank_5(224)                                                                                                                                                                                                                                                                        |



|        |                                                                                                                                                                                                                                                                                                                                                                                 |
|--------|---------------------------------------------------------------------------------------------------------------------------------------------------------------------------------------------------------------------------------------------------------------------------------------------------------------------------------------------------------------------------------|
| A6NI47 | (143)Ank_2(235)~(225)Ank_5(276)~(292)Ank_5(345)                                                                                                                                                                                                                                                                                                                                 |
| Q9BZE1 | (305)PDCD9(385)                                                                                                                                                                                                                                                                                                                                                                 |
| O15550 | (100)TPR_16(160)~(129)TPR_11(194)~(130)TPR_1(163)~(169)TPR_12(233)~(262)TPR_11(312)~(317)TPR_11(378)~(1133)JmjC(1241)                                                                                                                                                                                                                                                           |
| P00749 | (70)Kringl(151)~(179)Trypsin(419)                                                                                                                                                                                                                                                                                                                                               |
| Q86V71 | (4)KRAB(44)~(165)zf-H2C2_2(182)~(229)zf-C2H2(251)~(244)zf-H2C2_2(268)~(272)zf-H2C2_2(295)~(313)zf-C2H2(335)~(328)zf-H2C2_2(350)~(356)zf-H2C2_2(379)~(384)zf-H2C2_2(407)~(416)zf-H2C2_2(436)~(440)zf-H2C2_2(463)~(467)zf-H2C2_2(492)~(495)zf-H2C2_2(518)~(524)zf-H2C2_2(547)~(552)zf-H2C2_2(576)~(579)zf-H2C2_2(603)~(608)zf-H2C2_2(632)                                         |
| P07288 | (25)Trypsin(253)                                                                                                                                                                                                                                                                                                                                                                |
| Q5MCW4 | (8)KRAB(48)~(186)zf-C2H2(208)~(201)zf-H2C2_2(225)~(242)zf-C2H2(264)~(256)zf-H2C2_2(280)~(285)zf-H2C2_2(308)~(313)zf-H2C2_2(335)~(341)zf-H2C2_2(364)~(371)zf-H2C2_2(392)~(396)zf-H2C2_2(421)~(427)zf-H2C2_2(447)~(452)zf-H2C2_2(476)~(480)zf-H2C2_2(504)~(511)zf-H2C2_2(532)~(536)zf-H2C2_2(560)~(565)zf-H2C2_2(588)~(593)zf-H2C2_2(616)~(620)zf-H2C2_2(644)~(648)zf-H2C2_2(672) |
| O96013 | (10)PBD(63)~(326)Pkinase(572)                                                                                                                                                                                                                                                                                                                                                   |
| P49862 | (30)Trypsin(245)                                                                                                                                                                                                                                                                                                                                                                |
| P08218 | (30)Trypsin(262)                                                                                                                                                                                                                                                                                                                                                                |
| Q9Y225 | (78)zf-RING_2(118)                                                                                                                                                                                                                                                                                                                                                              |
| Q15029 | (3)EFTUD2(110)~(129)GTP_EFTU(370)~(491)GTP_EFTU_D2(566)~(707)EFG_IV(823)~(826)EFG_C(914)                                                                                                                                                                                                                                                                                        |
| P62380 | (11)TBP(90)~(99)TBP(178)                                                                                                                                                                                                                                                                                                                                                        |
| Q5T5J6 | (390)PIN_4(525)                                                                                                                                                                                                                                                                                                                                                                 |
| P17023 | (14)KRAB(54)~(176)zf-H2C2_2(198)~(204)zf-H2C2_2(227)~(217)zf-C2H2(239)~(261)zf-H2C2_2(283)~(288)zf-H2C2_2(311)~(315)zf-H2C2_2(338)~(344)zf-H2C2_2(367)~(357)zf-C2H2(379)~(402)zf-H2C2_2(424)                                                                                                                                                                                    |
| Q9NRA8 | (30)EIF4E-T(711)                                                                                                                                                                                                                                                                                                                                                                |
| Q92904 | (42)RRM_1(108)                                                                                                                                                                                                                                                                                                                                                                  |
| P15056 | (157)RBD(225)~(235)C1_1(280)~(458)Pkinase_Tyr(712)                                                                                                                                                                                                                                                                                                                              |
| P04430 | (6)V-set(106)                                                                                                                                                                                                                                                                                                                                                                   |
| Q9UET6 | (21)FtsJ(199)                                                                                                                                                                                                                                                                                                                                                                   |
| H3BUK9 | (106)Ank_2(199)~(155)Ank_5(209)~(188)Ank_5(239)~(255)Ank_5(308)~(489)CCDC144C(542)                                                                                                                                                                                                                                                                                              |
| Q9H777 | (34)Lactamase_B_2(314)                                                                                                                                                                                                                                                                                                                                                          |
| A6NC57 | (42)Ank_2(135)~(124)Ank_5(178)~(142)Ank_2(232)~(561)CCDC144C(854)                                                                                                                                                                                                                                                                                                               |
| Q9NW07 | (151)zf-C2H2(173)~(166)zf-H2C2_2(190)~(194)zf-H2C2_2(216)~(222)zf-H2C2_2(246)~(250)zf-H2C2_2(273)~(277)zf-H2C2_2(301)~(305)zf-H2C2_2(329)~(333)zf-H2C2_2(357)~(361)zf-H2C2_2(385)                                                                                                                                                                                               |
| O75570 | (83)PCRF(282)~(290)RF-1(399)                                                                                                                                                                                                                                                                                                                                                    |
| Q9NTZ6 | (5)RRM_6(69)~(307)RRM_6(364)~(432)RRM_6(501)~(547)RRM_6(612)~(858)RRM_6(919)                                                                                                                                                                                                                                                                                                    |
| Q9P289 | (24)Pkinase(274)                                                                                                                                                                                                                                                                                                                                                                |
| Q9NU02 | (52)Ank_2(144)~(213)Ank_2(278)~(529)Ank_2(621)                                                                                                                                                                                                                                                                                                                                  |
| Q9NWT1 | (35)WD40(68)~(79)WD40(109)~(113)WD40(151)~(237)WD40(275)                                                                                                                                                                                                                                                                                                                        |
| Q5JVG8 | (5)KRAB(44)~(201)zf-C2H2(223)~(215)zf-H2C2_2(240)~(243)zf-H2C2_2(268)~(274)zf-H2C2_2(294)~(300)zf-H2C2_2(323)~(327)zf-H2C2_2(351)~(355)zf-H2C2_2(379)~(384)zf-H2C2_2(406)                                                                                                                                                                                                       |
| Q5JPH6 | (37)tRNA-synt_1c(351)                                                                                                                                                                                                                                                                                                                                                           |
| Q16651 | (45)Trypsin(281)                                                                                                                                                                                                                                                                                                                                                                |
| Q2QGD7 | (175)zf-C2H2_aberr(231)~(208)zf-C2H2(232)~(210)zf-C2H2_8(286)~(244)zf-C2H2_8(318)~(345)zf-H2C2_2(370)~(375)zf-H2C2_2(401)~(388)zf-C2H2(412)~(405)zf-                                                                                                                                                                                                                            |

|        |                                                                                                                                                                                                                                                                                                                                                                                                                                                           |
|--------|-----------------------------------------------------------------------------------------------------------------------------------------------------------------------------------------------------------------------------------------------------------------------------------------------------------------------------------------------------------------------------------------------------------------------------------------------------------|
|        | H2C2_2(430)~(452)zf-C2H2_4(476)                                                                                                                                                                                                                                                                                                                                                                                                                           |
| Q16566 | (46)Pkinase(300)                                                                                                                                                                                                                                                                                                                                                                                                                                          |
| P04438 | (28)V-set(120)                                                                                                                                                                                                                                                                                                                                                                                                                                            |
| Q13033 | (64)Striatin(194)~(471)WD40(508)~(524)WD40(561)~(580)WD40(614)~(714)WD40(751)                                                                                                                                                                                                                                                                                                                                                                             |
| O94762 | (31)DEAD(200)~(258)Helicase_C(354)~(625)RecQ5(827)                                                                                                                                                                                                                                                                                                                                                                                                        |
| O14576 | (143)Dynein_IC2(173)                                                                                                                                                                                                                                                                                                                                                                                                                                      |
| P20226 | (164)TBP(243)~(252)TBP(333)                                                                                                                                                                                                                                                                                                                                                                                                                               |
| Q7L3T8 | (143)tRNA-synt_2b(354)                                                                                                                                                                                                                                                                                                                                                                                                                                    |
| Q9Y6R6 | (6)KRAB(46)~(179)zf-H2C2_2(202)~(208)zf-H2C2_2(230)~(249)zf-C2H2(271)~(263)zf-H2C2_2(287)~(277)zf-C2H2(299)~(321)zf-H2C2_2(343)~(348)zf-H2C2_2(371)~(376)zf-H2C2_2(399)~(389)zf-C2H2(411)~(431)zf-H2C2_2(455)~(462)zf-H2C2_2(483)~(488)zf-H2C2_2(511)~(515)zf-H2C2_2(538)~(544)zf-H2C2_2(567)~(571)zf-H2C2_2(594)~(599)zf-H2C2_2(623)~(629)zf-H2C2_2(651)~(641)zf-C2H2(663)~(669)zf-C2H2(691)~(712)zf-H2C2_2(734)~(740)zf-H2C2_2(763)~(774)zf-H2C2_2(790) |
| Q96BP2 | (45)CHCH(78)                                                                                                                                                                                                                                                                                                                                                                                                                                              |
| P0CJ79 | (8)KRAB(48)~(151)zf-H2C2_2(175)~(193)zf-C2H2(215)~(207)zf-H2C2_2(232)~(236)zf-H2C2_2(260)~(263)zf-H2C2_2(287)~(291)zf-H2C2_2(315)~(305)zf-C2H2(327)~(319)zf-H2C2_2(344)~(347)zf-H2C2_2(371)~(376)zf-H2C2_2(400)~(404)zf-H2C2_2(426)~(431)zf-H2C2_2(455)~(463)zf-H2C2_2(487)                                                                                                                                                                               |
| P17017 | (4)KRAB(44)~(103)zf-C2H2(125)~(117)zf-H2C2_2(151)~(156)zf-H2C2_2(178)~(184)zf-H2C2_2(206)~(217)zf-H2C2_2(232)~(238)zf-H2C2_2(261)~(266)zf-H2C2_2(289)~(294)zf-H2C2_2(316)~(322)zf-H2C2_2(345)~(351)zf-H2C2_2(373)~(377)zf-H2C2_2(401)~(405)zf-H2C2_2(429)~(433)zf-H2C2_2(456)~(462)zf-H2C2_2(484)~(490)zf-H2C2_2(513)~(517)zf-H2C2_2(541)~(548)zf-H2C2_2(568)~(574)zf-H2C2_2(596)~(603)zf-H2C2_2(624)                                                     |
| P01608 | (6)V-set(104)                                                                                                                                                                                                                                                                                                                                                                                                                                             |
| Q9BX46 | (13)RRM_6(80)                                                                                                                                                                                                                                                                                                                                                                                                                                             |
| Q8N0Z8 | (18)PseudoU_synth_1(123)~(168)PseudoU_synth_1(284)                                                                                                                                                                                                                                                                                                                                                                                                        |
| Q8NDT2 | (159)RRM_5(215)~(339)RRM_1(408)~(420)RRM_1(480)~(722)SPOC(857)                                                                                                                                                                                                                                                                                                                                                                                            |
| Q9NSE4 | (98)tRNA-synt_1(710)~(756)Anticodon_1(878)                                                                                                                                                                                                                                                                                                                                                                                                                |
| Q8N7H5 | (29)Paf1(429)                                                                                                                                                                                                                                                                                                                                                                                                                                             |
| Q6P9A1 | (14)KRAB(54)~(239)zf-C2H2(261)~(267)zf-C2H2(289)~(281)zf-H2C2_2(305)~(311)zf-H2C2_2(334)~(337)zf-H2C2_2(362)~(365)zf-H2C2_2(389)~(397)zf-H2C2_2(417)~(423)zf-H2C2_2(445)~(435)zf-C2H2(457)~(450)zf-H2C2_2(473)~(478)zf-H2C2_2(500)~(505)zf-H2C2_2(529)~(533)zf-H2C2_2(558)~(562)zf-H2C2_2(585)                                                                                                                                                            |
| Q5RKV6 | (36)RNase_PH(175)                                                                                                                                                                                                                                                                                                                                                                                                                                         |
| P82094 | (449)TMF_DNA_bd(486)~(542)TMF_DNA_bd(615)~(618)TMF_DNA_bd(662)~(725)TMF_DNA_bd(782)~(977)TMF_TATA_bd(1087)                                                                                                                                                                                                                                                                                                                                                |
| Q9UHL0 | (122)DEAD(285)~(324)Helicase_C(439)                                                                                                                                                                                                                                                                                                                                                                                                                       |
| P14210 | (42)PAN_1(121)~(128)Kringle(206)~(211)Kringle(288)~(305)Kringle(383)~(391)Kringle(469)~(501)Trypsin(716)                                                                                                                                                                                                                                                                                                                                                  |
| Q9NY93 | (31)DEAD(206)~(242)Helicase_C(380)                                                                                                                                                                                                                                                                                                                                                                                                                        |
| O15264 | (28)Pkinase(308)                                                                                                                                                                                                                                                                                                                                                                                                                                          |
| Q8WUE5 | (40)S1-like(81)~(112)S1-like(158)~(182)S1-like(233)                                                                                                                                                                                                                                                                                                                                                                                                       |
| P10265 | (7)RVP(105)~(112)G-patch(154)                                                                                                                                                                                                                                                                                                                                                                                                                             |
| Q9Y2K2 | (8)Pkinase(259)                                                                                                                                                                                                                                                                                                                                                                                                                                           |
| Q9BQG0 | (72)DNA_pol_phi(836)                                                                                                                                                                                                                                                                                                                                                                                                                                      |
| P57071 | (738)zf-C2H2(760)~(752)zf-H2C2_2(775)~(826)zf-C2H2(848)~(840)zf-H2C2_2(863)~(904)zf-C2H2_4(924)~(916)zf-H2C2_2(938)~(1022)zf-met(1039)~(1070)zf-H2C2_2(1094)~(1084)zf-C2H2(1106)~(1126)zf-H2C2_2(1150)~(1155)zf-H2C2_2(1178)~(1168)zf-C2H2_jaz(1187)~(1197)zf-C2H2(1219)~(1226)zf-C2H2(1248)                                                                                                                                                              |
| Q9HC35 | (226)HELP(296)~(300)WD40(347)~(588)WD40(620)~(717)WD40(749)~(826)WD40(863)                                                                                                                                                                                                                                                                                                                                                                                |

|        |                                                                                                                                                                                                                                                                                                                                                                                                                                     |
|--------|-------------------------------------------------------------------------------------------------------------------------------------------------------------------------------------------------------------------------------------------------------------------------------------------------------------------------------------------------------------------------------------------------------------------------------------|
| O95602 | (11)RNA_pol_Rpb1_1(354)~(388)RNA_pol_Rpb1_1(430)~(434)RNA_pol_Rpb1_2(613)~(617)RNA_pol_Rpb1_3(802)~(840)RNA_pol_Rpb1_4(951)~(958)RNA_pol_Rpb1_5(1668)                                                                                                                                                                                                                                                                               |
| Q12849 | (152)RRM_6(223)~(252)RRM_6(320)~(403)RRM_6(470)                                                                                                                                                                                                                                                                                                                                                                                     |
| Q9UHI6 | (87)DEAD(248)~(295)Helicase_C(404)                                                                                                                                                                                                                                                                                                                                                                                                  |
| Q9Y4K4 | (20)Pkinase(277)~(516)CNH(815)                                                                                                                                                                                                                                                                                                                                                                                                      |
| P55769 | (21)Ribosomal_L7Ae(111)                                                                                                                                                                                                                                                                                                                                                                                                             |
| Q6P280 | (39)KRAB(79)~(190)zf-H2C2_2(208)~(282)zf-C2H2(304)~(297)zf-H2C2_2(319)~(325)zf-H2C2_2(347)~(354)zf-H2C2_2(375)~(381)zf-H2C2_2(405)~(408)zf-H2C2_2(431)~(437)zf-H2C2_2(459)~(465)zf-H2C2_2(489)~(492)zf-H2C2_2(517)~(521)zf-H2C2_2(544)                                                                                                                                                                                              |
| O60229 | (190)Spectrin(307)~(311)Spectrin(414)~(540)Spectrin(640)~(645)Spectrin(707)~(891)Spectrin(998)~(1132)Spectrin(1224)~(1285)RhoGEF(1454)~(1491)PH(1579)~(1706)SH3-RhoG_link(1930)~(1932)RhoGEF(2102)~(2136)PH(2224)~(2470)I-set(2564)~(2570)fn3(2648)~(2683)Pkinase(2937)                                                                                                                                                             |
| P53582 | (9)zf-C6H2(54)~(137)Peptidase_M24(365)                                                                                                                                                                                                                                                                                                                                                                                              |
| Q6IQ21 | (42)zf-H2C2_2(65)~(81)zf-C2H2_jaz(100)~(175)zf-H2C2_2(198)~(188)zf-C2H2(210)~(202)zf-H2C2_2(226)~(490)zf-H2C2_2(513)~(505)zf-C2H2(525)~(640)zf-H2C2_2(663)                                                                                                                                                                                                                                                                          |
| P62875 | (1)RNA_pol_N(59)                                                                                                                                                                                                                                                                                                                                                                                                                    |
| Q9NRH2 | (16)Pkinase(269)                                                                                                                                                                                                                                                                                                                                                                                                                    |
| O00423 | (185)HELP(259)~(262)WD40(309)~(540)WD40(571)~(630)WD40(653)~(776)WD40(812)                                                                                                                                                                                                                                                                                                                                                          |
| Q96RS0 | (692)Methyltransf_15(844)                                                                                                                                                                                                                                                                                                                                                                                                           |
| O75093 | (33)LRRNT(60)~(62)LRR_8(121)~(159)LRR_8(217)~(239)LRRCT(264)~(282)LRRNT(308)~(311)LRR_8(369)~(382)LRR_8(440)~(464)LRRCT(488)~(513)LRRNT(539)~(560)LRR_5(670)~(590)LRR_8(649)~(695)LRRCT(720)~(733)LRRNT(760)~(786)LRR_5(865)~(808)LRR_8(868)~(891)LRRCT(914)~(929)EGF(959)~(968)EGF(1001)~(1009)EGF(1038)~(1047)EGF(1079)~(1087)EGF(1115)~(1131)EGF(1160)~(1195)Laminin_G_2(1321)~(1361)hEGF(1373)~(1381)EGF(1410)~(1442)hEGF(1453) |
| A2RRH5 | (159)WD40(193)~(550)WD40(583)~(744)WD40(782)                                                                                                                                                                                                                                                                                                                                                                                        |
| Q53R41 | (358)FAST_1(393)~(576)FAST_1(641)~(661)FAST_2(743)~(788)RAP(837)                                                                                                                                                                                                                                                                                                                                                                    |
| Q8NBT0 | (13)WD40(46)~(56)WD40(88)~(97)WD40(130)~(137)WD40(173)~(160)eIF2A(255)~(178)WD40(215)~(261)WD40(299)                                                                                                                                                                                                                                                                                                                                |
| P27361 | (42)Pkinase(330)                                                                                                                                                                                                                                                                                                                                                                                                                    |
| P55884 | (316)eIF2A(395)~(507)eIF2A(702)                                                                                                                                                                                                                                                                                                                                                                                                     |
| Q902F9 | (19)HERV-K_REC(105)~(115)HERV-K_env_2(283)~(486)GP41(682)                                                                                                                                                                                                                                                                                                                                                                           |
| Q8N4S9 | (193)MARVEL(360)~(446)Occludin_ELL(548)                                                                                                                                                                                                                                                                                                                                                                                             |
| P62266 | (9)Ribosom_S12_S23(142)                                                                                                                                                                                                                                                                                                                                                                                                             |
| Q8IZY2 | (551)ABC2_membrane_3(750)~(824)ABC_tran(968)~(1466)ABC2_membrane_3(1750)~(1812)ABC_tran(1953)                                                                                                                                                                                                                                                                                                                                       |
| O94761 | (483)DEAD(649)~(686)Helicase_C(809)                                                                                                                                                                                                                                                                                                                                                                                                 |
| Q13554 | (14)Pkinase(272)~(534)CaMKII_AD(661)                                                                                                                                                                                                                                                                                                                                                                                                |
| P61011 | (6)SRP54_N(83)~(102)SRP54(296)~(326)SRP_SPB(431)                                                                                                                                                                                                                                                                                                                                                                                    |
| Q8IWA0 | (48)WD40(86)~(201)WD40(230)                                                                                                                                                                                                                                                                                                                                                                                                         |
| P48200 | (62)Aconitase(136)~(209)Aconitase(639)~(768)Aconitase_C(894)                                                                                                                                                                                                                                                                                                                                                                        |
| O77932 | (235)RAI1(301)                                                                                                                                                                                                                                                                                                                                                                                                                      |
| Q9H9D4 | (367)zf-H2C2_2(391)~(383)zf-C2H2_jaz(403)~(396)zf-H2C2_2(420)~(423)zf-H2C2_2(447)~(469)zf-C2H2(490)~(482)zf-H2C2_2(506)~(510)zf-H2C2_2(533)~(539)zf-H2C2_2(559)~(566)zf-H2C2_2(589)~(594)zf-H2C2_2(616)                                                                                                                                                                                                                             |
| Q7Z2E3 | (188)DcpS_C(292)~(297)zf-C2HE(355)                                                                                                                                                                                                                                                                                                                                                                                                  |
| Q9UKI3 | (29)V-set(118)                                                                                                                                                                                                                                                                                                                                                                                                                      |
| Q15139 | (150)C1_1(197)~(271)C1_1(320)~(423)PH(539)~(587)Pkinase(839)                                                                                                                                                                                                                                                                                                                                                                        |
| Q7L0X0 | (84)LRR_8(143)~(156)LRR_8(215)~(229)LRR_8(289)~(302)LRR_8(359)                                                                                                                                                                                                                                                                                                                                                                      |

|        |                                                                                                                                                                                                                                                                                                                                                                                                                                                                                                                           |
|--------|---------------------------------------------------------------------------------------------------------------------------------------------------------------------------------------------------------------------------------------------------------------------------------------------------------------------------------------------------------------------------------------------------------------------------------------------------------------------------------------------------------------------------|
| P80419 | (12)V-set(117)                                                                                                                                                                                                                                                                                                                                                                                                                                                                                                            |
| O15226 | (552)G-patch(593)~(604)R3H(660)                                                                                                                                                                                                                                                                                                                                                                                                                                                                                           |
| O75417 | (103)DEAD(269)~(329)Helicase_C(485)~(2097)DNA_pol_A(2584)                                                                                                                                                                                                                                                                                                                                                                                                                                                                 |
| P01857 | (13)C1-set(93)~(130)C1-set(216)~(236)C1-set(318)                                                                                                                                                                                                                                                                                                                                                                                                                                                                          |
| P08519 | (28)Kring(105)~(142)Kring(219)~(256)Kring(333)~(370)Kring(447)~(484)Kring(561)~(598)Kring(675)~(712)Kring(789)~(826)Kring(903)~(940)Kring(1017)~(1054)Kring(1131)~(1168)Kring(1245)~(1282)Kring(1359)~(1396)Kring(1473)~(1510)Kring(1587)~(1624)Kring(1701)~(1738)Kring(1815)~(1852)Kring(1929)~(1966)Kring(2043)~(2080)Kring(2157)~(2194)Kring(2271)~(2308)Kring(2385)~(2422)Kring(2499)~(2536)Kring(2613)~(2650)Kring(2727)~(2764)Kring(2841)~(2878)Kring(2955)~(2992)Kring(3069)~(3106)Kring(3183)~(4328)Trypsin(4541) |
| Q13627 | (159)Pkinase(479)                                                                                                                                                                                                                                                                                                                                                                                                                                                                                                         |
| P06318 | (6)V-set(110)                                                                                                                                                                                                                                                                                                                                                                                                                                                                                                             |
| Q9Y6X6 | (95)Ank_4(146)~(205)Ank_2(285)~(404)Myosin_head(1133)~(1209)NYAP_N(1573)                                                                                                                                                                                                                                                                                                                                                                                                                                                  |
| Q02556 | (9)IRF(113)~(204)IRF-3(381)                                                                                                                                                                                                                                                                                                                                                                                                                                                                                               |
| Q9P0G3 | (41)Trypsin(260)                                                                                                                                                                                                                                                                                                                                                                                                                                                                                                          |
| Q9UMR2 | (117)DEAD(281)~(319)Helicase_C(434)                                                                                                                                                                                                                                                                                                                                                                                                                                                                                       |
| Q13347 | (43)WD40(80)~(185)WD40(216)~(281)WD40(311)                                                                                                                                                                                                                                                                                                                                                                                                                                                                                |
| Q8WVV9 | (78)RRM_6(129)~(185)RRM_5(242)~(352)RRM_5(407)                                                                                                                                                                                                                                                                                                                                                                                                                                                                            |
| Q13823 | (43)NGP1NT(174)~(313)MMR_HSR1(385)                                                                                                                                                                                                                                                                                                                                                                                                                                                                                        |
| O00178 | (162)GTP_EFTU(383)                                                                                                                                                                                                                                                                                                                                                                                                                                                                                                        |
| Q8N5D0 | (42)WD40(75)~(366)TPR_11(430)~(530)WD40(565)~(572)WD40(608)                                                                                                                                                                                                                                                                                                                                                                                                                                                               |
| A8MXY4 | (4)KRAB(44)~(162)zf-H2C2_2(182)~(188)zf-H2C2_2(211)~(216)zf-H2C2_2(238)~(258)zf-C2H2(279)~(272)zf-H2C2_2(296)~(299)zf-H2C2_2(324)~(327)zf-H2C2_2(351)~(356)zf-H2C2_2(380)~(383)zf-H2C2_2(407)~(426)zf-C2H2(447)~(439)zf-H2C2_2(464)~(467)zf-H2C2_2(491)~(510)zf-C2H2(531)~(523)zf-H2C2_2(548)~(552)zf-H2C2_2(576)~(579)zf-H2C2_2(604)~(607)zf-H2C2_2(631)~(636)zf-H2C2_2(659)~(663)zf-H2C2_2(688)~(691)zf-H2C2_2(715)~(720)zf-H2C2_2(743)~(748)zf-H2C2_2(772)~(775)zf-H2C2_2(800)~(804)zf-H2C2_2(826)                     |
| P17010 | (70)Zfx_Zfy_act(410)~(425)zf-C2H2(447)~(456)zf-H2C2_5(478)~(489)zf-C2H2(510)~(534)zf-H2C2_2(559)~(548)zf-C2H2(570)~(563)zf-H2C2_2(584)~(590)zf-H2C2_2(615)~(647)zf-H2C2_2(672)~(662)zf-C2H2(684)~(705)zf-H2C2_2(729)~(719)zf-C2H2(741)~(734)zf-H2C2_2(756)~(762)zf-H2C2_2(786)                                                                                                                                                                                                                                            |
| Q96L21 | (12)Ribosomal_L16(165)                                                                                                                                                                                                                                                                                                                                                                                                                                                                                                    |
| P63120 | (7)RVP(105)~(112)G-patch(154)                                                                                                                                                                                                                                                                                                                                                                                                                                                                                             |
| Q6ZN17 | (31)CSD(101)                                                                                                                                                                                                                                                                                                                                                                                                                                                                                                              |
| Q7Z3I7 | (146)zf-H2C2_2(169)~(175)zf-H2C2_2(199)~(203)zf-H2C2_2(227)~(231)zf-H2C2_2(255)~(259)zf-H2C2_2(282)~(272)zf-C2H2(294)~(315)zf-H2C2_2(339)~(384)zf-C2H2(406)~(398)zf-H2C2_2(422)~(427)zf-H2C2_2(450)~(440)zf-C2H2(462)~(454)zf-H2C2_2(478)                                                                                                                                                                                                                                                                                 |
| Q9Y3C5 | (98)zf-RING_2(139)                                                                                                                                                                                                                                                                                                                                                                                                                                                                                                        |
| Q14576 | (41)RRM_1(111)~(127)RRM_1(190)~(286)RRM_1(355)                                                                                                                                                                                                                                                                                                                                                                                                                                                                            |
| P61221 | (6)RLI(37)~(102)ABC_tran(244)~(367)ABC_tran(490)                                                                                                                                                                                                                                                                                                                                                                                                                                                                          |
| Q8N8L2 | (91)zf-H2C2_2(112)~(119)zf-H2C2_2(139)~(147)zf-H2C2_2(169)~(175)zf-H2C2_2(196)~(202)zf-H2C2_2(225)~(232)zf-H2C2_2(251)~(258)zf-H2C2_2(282)~(286)zf-H2C2_2(309)~(314)zf-H2C2_2(337)~(345)zf-H2C2_2(365)~(372)zf-H2C2_2(393)~(399)zf-H2C2_2(420)                                                                                                                                                                                                                                                                            |
| Q9NY12 | (54)Gar1(158)                                                                                                                                                                                                                                                                                                                                                                                                                                                                                                             |
| O95793 | (103)dsrm(160)~(187)dsrm(249)~(287)dsrm(352)~(447)Staufen_C(557)                                                                                                                                                                                                                                                                                                                                                                                                                                                          |
| Q9C098 | (356)Pkinase(613)                                                                                                                                                                                                                                                                                                                                                                                                                                                                                                         |
| P0CJ78 | (238)zf-H2C2_2(263)~(367)zf-H2C2_2(388)~(378)zf-C2H2(400)~(408)zf-C2H2(429)~(441)zf-C2H2(463)~(565)zf-H2C2_2(587)~(592)zf-H2C2_2(617)~(685)zf-                                                                                                                                                                                                                                                                                                                                                                            |

|        |                                                                                                                                                                                                                                                       |
|--------|-------------------------------------------------------------------------------------------------------------------------------------------------------------------------------------------------------------------------------------------------------|
|        | H2C2_2(706)~(835)zf-H2C2_2(858)~(863)zf-H2C2_2(886)~(891)zf-H2C2_2(914)~(933)zf-C2H2(954)~(946)zf-H2C2_2(969)~(976)zf-H2C2_2(999)~(1004)zf-H2C2_2(1028)                                                                                               |
| Q8WWQ0 | (180)WD40(210)~(216)WD40(252)~(259)WD40(298)~(358)WD40(392)~(456)WD40(495)~(1165)Bromodomain(1250)~(1325)Bromodomain(1405)                                                                                                                            |
| Q9GZR7 | (216)DEAD(511)~(574)Helicase_C(681)                                                                                                                                                                                                                   |
| Q9H3J6 | (53)RF-1(147)                                                                                                                                                                                                                                         |
| Q3SXZ3 | (4)KRAB(44)~(171)zf-C2H2(193)~(186)zf-H2C2_2(208)~(227)zf-C2H2(249)~(241)zf-H2C2_2(265)~(255)zf-C2H2(277)~(270)zf-H2C2_2(293)~(297)zf-H2C2_2(322)~(326)zf-H2C2_2(349)~(354)zf-H2C2_2(376)~(382)zf-H2C2_2(405)~(414)zf-H2C2_2(434)~(437)zf-H2C2_2(462) |
| O94898 | (144)LRR_8(192)~(240)LRR_8(299)~(312)LRR_8(371)~(325)LRR_5(442)~(497)Ig_3(584)~(602)I-set(692)~(696)I-set(783)                                                                                                                                        |
| O43432 | (755)MIF4G(981)~(1222)MA3(1333)~(1507)W2(1584)                                                                                                                                                                                                        |
| Q8NAA4 | (17)ATG16(207)~(330)WD40(364)~(415)WD40(450)~(473)WD40(489)~(502)WD40(530)~(551)WD40(576)                                                                                                                                                             |
| O75879 | (66)GatB_N(350)~(406)GatB_Yqey(555)                                                                                                                                                                                                                   |
| Q8N9V3 | (3)WD40(37)~(50)WD40(82)~(99)WD40(125)~(173)WD40(217)~(232)WD40(267)~(272)WD40(308)~(332)SAM_2(394)~(404)U-box(476)                                                                                                                                   |
| P62906 | (25)Ribosomal_L1(212)                                                                                                                                                                                                                                 |
| Q00526 | (4)Pkinase(286)                                                                                                                                                                                                                                       |
| P55265 | (135)z-alpha(200)~(295)z-alpha(358)~(504)dsrm(567)~(615)dsrm(680)~(728)dsrm(792)~(886)A_deamin(1215)                                                                                                                                                  |
| Q9UM11 | (307)WD40(341)~(346)WD40(386)~(436)WD40(471)                                                                                                                                                                                                          |
| P0CG31 | (262)zf-H2C2_2(283)~(272)zf-C2H2(294)~(314)zf-H2C2_2(337)~(355)zf-C2H2(377)~(370)zf-H2C2_2(394)~(397)zf-H2C2_2(421)~(425)zf-H2C2_2(449)~(453)zf-H2C2_2(477)~(482)zf-H2C2_2(505)                                                                       |
| Q8IYU2 | (41)Ank_2(128)~(84)Ank_5(136)~(129)Ank_2(192)~(150)Ank_5(204)~(604)HECT(902)                                                                                                                                                                          |
| Q8IV42 | (20)AAA_33(205)~(138)KTI12(295)                                                                                                                                                                                                                       |
| P01602 | (28)V-set(114)                                                                                                                                                                                                                                        |
| P83881 | (17)Ribosomal_L44(94)                                                                                                                                                                                                                                 |
| Q5T653 | (84)Ribosomal_L2(164)~(178)Ribosomal_L2_C(271)                                                                                                                                                                                                        |
| O95786 | (1)CARD_2(92)~(100)CARD_2(186)~(256)ResIII(410)~(614)Helicase_C(732)~(807)RIG-I_C-RD(922)                                                                                                                                                             |
| P39023 | (1)Ribosomal_L3(375)                                                                                                                                                                                                                                  |
| Q15020 | (706)RRM_1(774)~(803)RRM_1(871)~(877)LSM_int_assoc(937)                                                                                                                                                                                               |
| P51956 | (4)Pkinase(253)                                                                                                                                                                                                                                       |
| P60321 | (63)zf-nanos(115)                                                                                                                                                                                                                                     |
| Q9H9Q4 | (12)XLF(174)                                                                                                                                                                                                                                          |
| P63124 | (7)RVP(105)~(112)G-patch(154)                                                                                                                                                                                                                         |
| A7XYQ1 | (224)SOBP(543)                                                                                                                                                                                                                                        |
| O75818 | (75)Ribonuc_P_40(346)                                                                                                                                                                                                                                 |
| Q7Z7F7 | (11)Mitoc_L55(125)                                                                                                                                                                                                                                    |
| Q9H5H4 | (278)zf-H2C2_2(299)~(304)zf-H2C2_2(327)~(332)zf-H2C2_2(354)~(345)zf-C2H2(367)~(387)zf-H2C2_2(411)~(419)zf-H2C2_2(439)~(457)zf-C2H2(479)~(500)zf-H2C2_2(523)~(513)zf-C2H2(535)                                                                         |
| P03951 | (22)PAN_1(103)~(119)PAN_1(193)~(203)PAN_1(283)~(296)PAN_1(371)~(388)Trypsin(618)                                                                                                                                                                      |
| P05423 | (263)RNA_pol_Rpc4(389)                                                                                                                                                                                                                                |
| Q00536 | (165)Pkinase(446)                                                                                                                                                                                                                                     |
| P62318 | (9)LSM(72)                                                                                                                                                                                                                                            |
| P24928 | (16)RNA_pol_Rpb1_1(354)~(356)RNA_pol_Rpb1_2(521)~(525)RNA_pol_Rpb1_3(691)~(                                                                                                                                                                           |

|        |                                                                                                                                                                                                                                                                                                                                                                                                                                                                        |
|--------|------------------------------------------------------------------------------------------------------------------------------------------------------------------------------------------------------------------------------------------------------------------------------------------------------------------------------------------------------------------------------------------------------------------------------------------------------------------------|
|        | 718)RNA_pol_Rpb1_4(823)~(830)RNA_pol_Rpb1_5(1427)~(1555)RNA_pol_Rpb1_R(1568)~(1616)RNA_pol_Rpb1_R(1629)~(1630)RNA_pol_Rpb1_R(1643)~(1644)RNA_pol_Rpb1_R(1657)~(1658)RNA_pol_Rpb1_R(1671)~(1672)RNA_pol_Rpb1_R(1685)~(1686)RNA_pol_Rpb1_R(1699)~(1707)RNA_pol_Rpb1_R(1720)~(1714)RNA_pol_Rpb1_R(1727)~(1735)RNA_pol_Rpb1_R(1748)~(1742)RNA_pol_Rpb1_R(1755)~(1770)RNA_pol_Rpb1_R(1783)~(1778)RNA_pol_Rpb1_R(1790)~(1784)RNA_pol_Rpb1_R(1797)~(1791)RNA_pol_Rpb1_R(1804) |
| P57727 | (113)SRCR_2(210)~(217)Trypsin(444)                                                                                                                                                                                                                                                                                                                                                                                                                                     |
| Q86U38 | (194)PUF(217)~(353)PUF(383)~(512)PUF(535)~(549)PUF(569)                                                                                                                                                                                                                                                                                                                                                                                                                |
| Q15459 | (50)Surp(101)~(164)Surp(215)~(228)PRP21_like_P(471)~(722)ubiquitin(788)                                                                                                                                                                                                                                                                                                                                                                                                |
| P29375 | (20)JmjN(53)~(88)ARID(170)~(295)PHD(342)~(470)JmjC(586)~(676)zf-C5HC2(727)~(741)PLU-1(1072)~(1163)PHD(1217)~(1615)PHD(1660)                                                                                                                                                                                                                                                                                                                                            |
| Q96RE9 | (8)KRAB(48)~(286)zf-H2C2_2(307)~(311)zf-H2C2_2(335)~(341)zf-H2C2_2(363)~(370)zf-H2C2_2(391)~(398)zf-H2C2_2(418)~(424)zf-H2C2_2(448)~(454)zf-H2C2_2(476)~(482)zf-H2C2_2(502)~(511)zf-H2C2_2(531)~(539)zf-H2C2_2(559)~(564)zf-H2C2_2(586)                                                                                                                                                                                                                                |
| P19838 | (44)RHD_DNA_bind(242)~(251)RHD_dimer(352)~(525)Ank_2(612)~(586)Ank_2(680)~(652)Ank_4(705)~(705)Ank_5(751)~(818)Death(890)                                                                                                                                                                                                                                                                                                                                              |
| Q9UGM6 | (33)tRNA-synt_1b(314)                                                                                                                                                                                                                                                                                                                                                                                                                                                  |
| Q8IUA7 | (32)ABC2_membrane_3(419)~(500)ABC_tran(646)~(952)ABC2_membrane_3(1219)~(1310)ABC_tran(1448)                                                                                                                                                                                                                                                                                                                                                                            |
| P61576 | (19)HERV-K_REC(105)                                                                                                                                                                                                                                                                                                                                                                                                                                                    |
| P0CG48 | (6)ubiquitin(74)~(82)ubiquitin(150)~(158)ubiquitin(226)~(234)ubiquitin(302)~(310)ubiquitin(378)~(386)ubiquitin(454)~(462)ubiquitin(530)~(538)ubiquitin(606)~(614)ubiquitin(682)                                                                                                                                                                                                                                                                                        |
| Q13237 | (187)cNMP_binding(268)~(305)cNMP_binding(390)~(455)Pkinase(711)                                                                                                                                                                                                                                                                                                                                                                                                        |
| A2RTX5 | (167)TGS(222)~(329)tRNA_SAD(377)~(476)tRNA-synt_2b(687)~(699)HGTP_anticonodon(789)                                                                                                                                                                                                                                                                                                                                                                                     |
| Q8WXK3 | (24)Ank_2(112)~(121)Ank_2(212)                                                                                                                                                                                                                                                                                                                                                                                                                                         |
| Q9ULH0 | (60)Ank_2(131)~(156)Ank_5(197)~(174)Ank_2(264)~(306)Ank_2(390)~(440)KAP_NTPase(953)                                                                                                                                                                                                                                                                                                                                                                                    |
| Q5JTH9 | (473)NUC173(669)~(950)NUC173(1027)                                                                                                                                                                                                                                                                                                                                                                                                                                     |
| O15205 | (20)ubiquitin(79)~(101)ubiquitin(159)                                                                                                                                                                                                                                                                                                                                                                                                                                  |
| Q7Z695 | (189)ABC1(218)~(292)ABC1(387)                                                                                                                                                                                                                                                                                                                                                                                                                                          |
| O75940 | (66)SMN(163)                                                                                                                                                                                                                                                                                                                                                                                                                                                           |
| A6NNF4 | (4)KRAB(44)~(159)zf-H2C2_2(182)~(201)zf-C2H2(223)~(216)zf-H2C2_2(239)~(243)zf-H2C2_2(267)~(272)zf-H2C2_2(295)~(299)zf-H2C2_2(323)~(328)zf-H2C2_2(351)~(355)zf-H2C2_2(378)~(384)zf-H2C2_2(407)~(411)zf-H2C2_2(434)~(439)zf-H2C2_2(464)~(467)zf-H2C2_2(491)~(496)zf-H2C2_2(518)~(524)zf-H2C2_2(547)~(551)zf-H2C2_2(575)~(579)zf-H2C2_2(602)~(609)zf-H2C2_2(632)~(640)zf-H2C2_2(660)~(668)zf-H2C2_2(688)                                                                  |
| Q9Y6R4 | (1344)Pkinase(1601)                                                                                                                                                                                                                                                                                                                                                                                                                                                    |
| Q14151 | (30)SAP(63)~(409)RRM_1(478)                                                                                                                                                                                                                                                                                                                                                                                                                                            |
| P27635 | (12)Ribosomal_L16(165)                                                                                                                                                                                                                                                                                                                                                                                                                                                 |
| Q8IYB8 | (368)Helicase_C(474)~(625)SUV3_C(670)                                                                                                                                                                                                                                                                                                                                                                                                                                  |
| Q96PQ6 | (57)KRAB(97)~(222)zf-C2H2(244)~(236)zf-H2C2_2(260)~(250)zf-C2H2(272)~(292)zf-H2C2_2(316)~(321)zf-H2C2_2(343)~(348)zf-H2C2_2(371)~(376)zf-H2C2_2(399)~(406)zf-H2C2_2(429)~(433)zf-H2C2_2(456)~(460)zf-H2C2_2(483)~(503)zf-C2H2(524)~(517)zf-H2C2_2(540)~(544)zf-H2C2_2(568)                                                                                                                                                                                             |
| Q15569 | (59)Pkinase_Tyr(311)                                                                                                                                                                                                                                                                                                                                                                                                                                                   |
| Q14929 | (15)KRAB(54)~(249)zf-H2C2_2(272)~(276)zf-H2C2_2(300)~(304)zf-H2C2_2(328)~(333)zf-H2C2_2(355)~(360)zf-H2C2_2(384)~(402)zf-C2H2(424)~(417)zf-H2C2_2(440)~(448)zf-H2C2_2(468)~(473)zf-H2C2_2(495)~(543)zf-C2H2(564)~(557)zf-H2C2_2(580)                                                                                                                                                                                                                                   |
| P20794 | (4)Pkinase(284)                                                                                                                                                                                                                                                                                                                                                                                                                                                        |

|        |                                                                                                                                                                                                                                                                                                          |
|--------|----------------------------------------------------------------------------------------------------------------------------------------------------------------------------------------------------------------------------------------------------------------------------------------------------------|
| Q96PY6 | (4)Pkinase(257)                                                                                                                                                                                                                                                                                          |
| Q14CZ7 | (410)FAST_1(477)~(490)FAST_2(580)~(594)RAP(650)                                                                                                                                                                                                                                                          |
| Q8N883 | (8)KRAB(48)~(194)zf-H2C2_2(215)~(274)zf-H2C2_2(297)~(304)zf-H2C2_2(325)~(329)zf-H2C2_2(353)~(358)zf-H2C2_2(381)~(371)zf-C2H2(393)~(414)zf-H2C2_2(438)~(444)zf-H2C2_2(465)~(483)zf-C2H2(505)~(499)zf-H2C2_2(522)~(526)zf-H2C2_2(550)                                                                      |
| Q9Y263 | (12)WD40(46)~(58)WD40(97)~(104)WD40(138)~(142)WD40(179)~(181)WD40(217)~(221)WD40(259)~(263)WD40(297)~(346)PFU(458)~(535)PUL(788)                                                                                                                                                                         |
| P80192 | (59)SH3_9(112)~(146)Pkinase(401)                                                                                                                                                                                                                                                                         |
| O15438 | (312)ABC_membrane(581)~(644)ABC_tran(778)~(972)ABC_membrane(1239)~(1306)ABC_tran(1454)                                                                                                                                                                                                                   |
| Q8N1V2 | (56)WD40(82)~(457)WD40(489)~(537)WD40(573)~(580)WD40(614)                                                                                                                                                                                                                                                |
| Q16539 | (24)Pkinase(308)                                                                                                                                                                                                                                                                                         |
| Q9BUY5 | (42)KRAB(82)~(147)zf-C2H2(167)~(224)zf-C2H2(246)~(295)zf-H2C2_2(319)~(324)zf-H2C2_2(347)~(351)zf-H2C2_2(375)~(381)zf-H2C2_2(402)~(406)zf-H2C2_2(431)~(435)zf-H2C2_2(459)~(462)zf-H2C2_2(487)~(491)zf-H2C2_2(514)~(519)zf-H2C2_2(543)                                                                     |
| Q969W8 | (6)KRAB(46)~(199)zf-C2H2(221)~(214)zf-H2C2_2(236)~(241)zf-H2C2_2(266)~(269)zf-H2C2_2(294)~(297)zf-H2C2_2(321)~(326)zf-H2C2_2(349)~(353)zf-H2C2_2(377)~(367)zf-C2H2(389)                                                                                                                                  |
| P52747 | (253)zf-H2C2_2(280)~(284)zf-H2C2_2(310)~(313)zf-H2C2_2(340)~(346)zf-H2C2_2(369)~(373)zf-H2C2_2(399)~(417)zf-C2H2(440)                                                                                                                                                                                    |
| P17019 | (92)zf-H2C2_2(113)~(119)zf-H2C2_2(142)~(146)zf-H2C2_2(170)~(175)zf-H2C2_2(198)~(202)zf-H2C2_2(227)~(230)zf-H2C2_2(254)~(258)zf-H2C2_2(282)~(287)zf-H2C2_2(310)~(314)zf-H2C2_2(338)~(343)zf-H2C2_2(366)~(371)zf-H2C2_2(395)~(398)zf-H2C2_2(421)~(426)zf-H2C2_2(450)~(455)zf-H2C2_2(478)~(468)zf-C2H2(490) |
| Q9Y3B4 | (21)RRM_1(87)                                                                                                                                                                                                                                                                                            |
| Q9NRK6 | (175)ABC_membrane(438)~(511)ABC_tran(662)                                                                                                                                                                                                                                                                |
| Q86YV6 | (108)Pkinase(361)                                                                                                                                                                                                                                                                                        |
| P62987 | (6)ubiquitin(74)~(78)Ribosomal_L40e(127)                                                                                                                                                                                                                                                                 |
| A6NIE9 | (68)Trypsin(305)                                                                                                                                                                                                                                                                                         |
| Q96T37 | (181)RRM_1(245)~(376)RRM_1(444)~(457)RRM_6(510)~(788)SPOC(924)                                                                                                                                                                                                                                           |
| Q6P2I7 | (78)BDV_P40(266)                                                                                                                                                                                                                                                                                         |
| Q99758 | (238)ABC2_membrane_3(469)~(550)ABC_tran(693)~(923)ABC2_membrane_3(1322)~(1400)ABC_tran(1542)                                                                                                                                                                                                             |
| Q9UIJ7 | (12)ADK(191)                                                                                                                                                                                                                                                                                             |
| Q9BVC4 | (14)WD40(27)~(34)WD40(69)~(87)WD40(113)~(120)WD40(156)~(223)WD40(247)~(269)WD40(297)                                                                                                                                                                                                                     |
| O76039 | (14)Pkinase(297)                                                                                                                                                                                                                                                                                         |
| Q9Y2R5 | (15)Ribosomal_S17(82)                                                                                                                                                                                                                                                                                    |
| Q6GPI1 | (34)Trypsin(256)                                                                                                                                                                                                                                                                                         |
| P01604 | (6)V-set(106)                                                                                                                                                                                                                                                                                            |
| Q86YR6 | (143)Ank_2(235)~(225)Ank_5(276)~(287)Ank_2(360)~(526)CCDC144C(582)                                                                                                                                                                                                                                       |
| Q6ZS30 | (858)DUF4704(1123)~(1580)DUF4800(1833)~(1894)PH_BEACH(1979)~(2005)Beach(2284)                                                                                                                                                                                                                            |
| Q15424 | (409)RRM_1(477)                                                                                                                                                                                                                                                                                          |
| P01719 | (5)V-set(107)                                                                                                                                                                                                                                                                                            |
| Q8WUA2 | (3)Pro_isomerase(159)~(242)RRM_1(312)                                                                                                                                                                                                                                                                    |
| P53803 | (17)DNA_RNApol_7kD(48)                                                                                                                                                                                                                                                                                   |
| Q13546 | (21)Pkinase_Tyr(284)~(585)Death(666)                                                                                                                                                                                                                                                                     |
| Q5T9C2 | (6)NT-C2(152)                                                                                                                                                                                                                                                                                            |
| Q96JF6 | (127)zf-C2H2(149)~(169)zf-H2C2_2(193)~(183)zf-C2H2(205)~(197)zf-                                                                                                                                                                                                                                         |

|        |                                                                                                                                                                                                                                                                                                                       |
|--------|-----------------------------------------------------------------------------------------------------------------------------------------------------------------------------------------------------------------------------------------------------------------------------------------------------------------------|
|        | H2C2_2(221)~(211)zf-C2H2(233)~(255)zf-H2C2_2(277)~(285)zf-H2C2_2(305)~(309)zf-H2C2_2(333)~(391)zf-H2C2_2(414)~(418)zf-H2C2_2(441)~(447)zf-H2C2_2(470)~(474)zf-H2C2_2(498)~(505)zf-H2C2_2(525)~(583)zf-H2C2_2(606)~(610)zf-H2C2_2(633)~(639)zf-H2C2_2(662)~(666)zf-H2C2_2(690)~(697)zf-H2C2_2(717)~(776)zf-H2C2_2(797) |
| Q8IYN0 | (35)KRAB(74)~(192)zf-H2C2_2(214)~(219)zf-H2C2_2(242)~(248)zf-H2C2_2(271)~(275)zf-H2C2_2(299)~(303)zf-H2C2_2(327)~(331)zf-H2C2_2(355)~(360)zf-H2C2_2(383)~(388)zf-H2C2_2(410)~(415)zf-H2C2_2(439)~(443)zf-H2C2_2(467)~(472)zf-H2C2_2(495)~(485)zf-C2H2(507)                                                            |
| Q9H6R4 | (165)Nrap(1138)                                                                                                                                                                                                                                                                                                       |
| Q9Y450 | (54)HBS1_N(124)~(259)GTP_EFTU(469)~(574)GTP_EFTU_D3(682)                                                                                                                                                                                                                                                              |
| O95201 | (124)KRAB(155)~(322)zf-H2C2_2(346)~(351)zf-H2C2_2(375)~(381)zf-H2C2_2(403)~(406)zf-H2C2_2(430)~(434)zf-H2C2_2(458)~(462)zf-H2C2_2(487)~(490)zf-H2C2_2(515)                                                                                                                                                            |
| Q8IZ73 | (231)PseudoU_synth_2(377)                                                                                                                                                                                                                                                                                             |
| P01599 | (6)V-set(106)                                                                                                                                                                                                                                                                                                         |
| P01760 | (10)V-set(120)                                                                                                                                                                                                                                                                                                        |
| Q9Y575 | (16)Ank_2(108)~(82)Ank_4(132)~(150)Ank_2(240)~(459)SOCS_box(500)                                                                                                                                                                                                                                                      |
| Q9Y297 | (139)Beta-TrCP_D(177)~(191)F-box-like(228)~(304)WD40(329)~(334)WD40(369)~(374)WD40(409)~(420)WD40(452)~(457)WD40(492)~(496)WD40(532)~(547)WD40(581)                                                                                                                                                                   |
| O95780 | (4)KRAB(44)~(159)zf-H2C2_2(184)~(188)zf-H2C2_2(211)~(216)zf-H2C2_2(238)~(243)zf-H2C2_2(266)~(273)zf-H2C2_2(295)~(299)zf-H2C2_2(324)~(328)zf-H2C2_2(351)~(356)zf-H2C2_2(380)~(384)zf-H2C2_2(406)~(412)zf-H2C2_2(435)~(439)zf-H2C2_2(464)~(453)zf-C2H2(473)                                                             |
| Q13117 | (42)RRM_1(98)                                                                                                                                                                                                                                                                                                         |
| P31941 | (20)APOBEC_N(191)                                                                                                                                                                                                                                                                                                     |
| Q96NJ3 | (8)KRAB(46)~(250)zf-H2C2_2(270)~(316)zf-C2H2(338)~(333)zf-H2C2_2(353)~(362)zf-H2C2_2(382)~(386)zf-H2C2_2(410)~(415)zf-H2C2_2(438)~(445)zf-H2C2_2(467)~(473)zf-H2C2_2(495)~(512)zf-C2H2(534)~(526)zf-H2C2_2(551)                                                                                                       |
| O00206 | (78)LRR_8(136)~(151)LRR_8(207)~(207)LRR_8(236)~(349)LRR_8(385)~(399)LRR_4(440)~(447)LRR_8(508)~(676)TIR(839)                                                                                                                                                                                                          |
| O60765 | (14)KRAB(54)~(214)zf-C2H2_4(236)~(228)zf-H2C2_2(252)~(257)zf-H2C2_2(280)~(284)zf-H2C2_2(309)~(354)zf-C2H2(376)~(368)zf-H2C2_2(392)~(397)zf-H2C2_2(421)~(425)zf-H2C2_2(446)~(455)zf-H2C2_2(476)~(481)zf-H2C2_2(503)~(508)zf-H2C2_2(532)~(537)zf-H2C2_2(560)~(568)zf-H2C2_2(589)                                        |
| Q9P2I0 | (22)Lactamase_B_6(194)~(243)Beta-Casp(367)~(527)RMMBL(569)~(608)CPSF100_C(779)                                                                                                                                                                                                                                        |
| P01714 | (5)V-set(107)                                                                                                                                                                                                                                                                                                         |
| Q9BV20 | (44)IF-2B(346)                                                                                                                                                                                                                                                                                                        |
| Q9C0B1 | (37)FTO_NTD(325)~(329)FTO_CTD(497)                                                                                                                                                                                                                                                                                    |
| O95620 | (31)Dus(292)                                                                                                                                                                                                                                                                                                          |
| P01818 | (7)V-set(119)                                                                                                                                                                                                                                                                                                         |
| Q6UWQ5 | (20)Lys(145)                                                                                                                                                                                                                                                                                                          |
| B2RXH2 | (16)JmjN(50)~(176)JmjC(292)                                                                                                                                                                                                                                                                                           |
| Q96PX8 | (86)LRR_8(142)~(375)LRR_8(435)~(425)LRR_8(483)                                                                                                                                                                                                                                                                        |
| Q8WWB5 | (30)PIH1(313)                                                                                                                                                                                                                                                                                                         |
| P01702 | (5)V-set(110)                                                                                                                                                                                                                                                                                                         |
| Q15287 | (165)RRM_1(233)                                                                                                                                                                                                                                                                                                       |
| Q9UJN7 | (110)zf-C2H2(131)~(123)zf-H2C2_2(148)~(152)zf-H2C2_2(176)~(179)zf-H2C2_2(204)~(207)zf-H2C2_2(230)~(239)zf-H2C2_2(259)~(263)zf-H2C2_2(288)~(291)zf-H2C2_2(316)~(321)zf-H2C2_2(342)                                                                                                                                     |
| P52564 | (56)Pkinase(314)                                                                                                                                                                                                                                                                                                      |



|        |                                                                                                                                                                                                                                                                                                                                                                                                                                                                                                                           |
|--------|---------------------------------------------------------------------------------------------------------------------------------------------------------------------------------------------------------------------------------------------------------------------------------------------------------------------------------------------------------------------------------------------------------------------------------------------------------------------------------------------------------------------------|
| P62979 | (6)ubiquitin(74)~(102)Ribosomal_S27(147)                                                                                                                                                                                                                                                                                                                                                                                                                                                                                  |
| Q9HBE1 | (30)BTB(159)~(293)zf-C2H2_4(314)~(369)zf-H2C2_2(394)~(413)zf-C2H2(436)~(427)zf-H2C2_2(453)~(497)zf-C2H2_4(518)~(536)zf-C2H2_assoc3(604)~(605)zf-C2H2(628)                                                                                                                                                                                                                                                                                                                                                                 |
| Q7Z6V5 | (21)dCMP_cyt_deam_1(125)                                                                                                                                                                                                                                                                                                                                                                                                                                                                                                  |
| Q8TBF4 | (12)RRM_1(82)                                                                                                                                                                                                                                                                                                                                                                                                                                                                                                             |
| Q9HBG6 | (45)WD40(80)~(319)WD40(348)                                                                                                                                                                                                                                                                                                                                                                                                                                                                                               |
| O96017 | (113)FHA(191)~(222)Pkinase(486)                                                                                                                                                                                                                                                                                                                                                                                                                                                                                           |
| P04208 | (6)V-set(108)                                                                                                                                                                                                                                                                                                                                                                                                                                                                                                             |
| O60262 | (5)G-gamma(68)                                                                                                                                                                                                                                                                                                                                                                                                                                                                                                            |
| P61571 | (19)HERV-K_REC(104)                                                                                                                                                                                                                                                                                                                                                                                                                                                                                                       |
| Q07352 | (1)Tis11B_N(104)~(115)zf-CCCH(140)~(153)zf-CCCH(177)                                                                                                                                                                                                                                                                                                                                                                                                                                                                      |
| Q9H9V9 | (223)JmjC(330)                                                                                                                                                                                                                                                                                                                                                                                                                                                                                                            |
| Q6P5Z2 | (21)HR1(77)~(107)HR1(169)~(181)HR1(242)~(562)Pkinase(818)                                                                                                                                                                                                                                                                                                                                                                                                                                                                 |
| Q8WWF5 | (151)PA(223)~(309)zf-RING_2(352)                                                                                                                                                                                                                                                                                                                                                                                                                                                                                          |
| P57775 | (29)F-box-like(72)~(197)WD40(227)~(328)WD40(365)                                                                                                                                                                                                                                                                                                                                                                                                                                                                          |
| Q6ZNA1 | (8)KRAB(48)~(218)zf-C2H2(240)~(233)zf-H2C2_2(256)~(274)zf-C2H2(296)~(288)zf-H2C2_2(312)~(316)zf-H2C2_2(341)~(345)zf-H2C2_2(368)~(372)zf-H2C2_2(396)~(400)zf-H2C2_2(425)~(428)zf-H2C2_2(452)~(457)zf-H2C2_2(480)~(485)zf-H2C2_2(509)~(513)zf-H2C2_2(536)~(541)zf-H2C2_2(565)~(568)zf-H2C2_2(593)~(597)zf-H2C2_2(620)~(624)zf-H2C2_2(649)~(653)zf-H2C2_2(676)~(666)zf-C2H2(688)~(717)zf-H2C2_2(733)~(737)zf-H2C2_2(760)~(764)zf-H2C2_2(789)~(793)zf-H2C2_2(815)~(821)zf-H2C2_2(843)~(849)zf-H2C2_2(872)~(877)zf-H2C2_2(899) |
| P28698 | (40)SCAN(126)~(370)zf-H2C2_2(395)~(384)zf-C2H2(406)~(427)zf-H2C2_2(450)~(440)zf-C2H2(462)~(500)zf-H2C2_2(523)~(528)zf-H2C2_2(551)~(555)zf-H2C2_2(579)~(584)zf-H2C2_2(607)~(612)zf-H2C2_2(635)~(640)zf-H2C2_2(663)~(667)zf-H2C2_2(691)~(681)zf-C2H2(703)~(696)zf-H2C2_2(719)                                                                                                                                                                                                                                               |
| Q12901 | (8)KRAB(48)~(193)zf-H2C2_2(214)~(204)zf-C2H2(226)~(218)zf-H2C2_2(243)~(246)zf-H2C2_2(270)~(275)zf-H2C2_2(298)~(303)zf-H2C2_2(326)~(330)zf-H2C2_2(353)~(359)zf-H2C2_2(381)~(387)zf-H2C2_2(411)~(415)zf-H2C2_2(439)~(442)zf-H2C2_2(467)~(456)zf-C2H2(478)                                                                                                                                                                                                                                                                   |
| Q9NP77 | (6)Ssu72(194)                                                                                                                                                                                                                                                                                                                                                                                                                                                                                                             |
| Q969Y2 | (35)TrmE_N(152)~(155)MnmE_helical(489)                                                                                                                                                                                                                                                                                                                                                                                                                                                                                    |
| Q9NVR5 | (43)PIH1(348)                                                                                                                                                                                                                                                                                                                                                                                                                                                                                                             |
| Q9H6S0 | (50)R3H(104)~(198)DEAD(352)~(614)Helicase_C(743)~(809)HA2(900)~(939)OB_NTP_bind(1065)~(1289)YTH(1419)                                                                                                                                                                                                                                                                                                                                                                                                                     |
| Q7RTY8 | (108)SEA(210)~(268)CUB(357)~(374)CUB(433)~(483)Ldl_recept_a(518)~(536)Ldl_recept_a(553)~(559)Ldl_recept_a(594)~(606)Trypsin(835)                                                                                                                                                                                                                                                                                                                                                                                          |
| P50851 | (215)Laminin_G_3(376)~(446)DUF4704(717)~(1880)DUF1088(2058)~(2084)PH_BEACH(2180)~(2213)Beach(2489)                                                                                                                                                                                                                                                                                                                                                                                                                        |
| Q96GQ7 | (242)DEAD(412)~(456)Helicase_C(558)                                                                                                                                                                                                                                                                                                                                                                                                                                                                                       |
| P52815 | (63)Ribosomal_L12_N(113)~(130)Ribosomal_L12(197)                                                                                                                                                                                                                                                                                                                                                                                                                                                                          |
| Q9Y534 | (70)CSD(133)                                                                                                                                                                                                                                                                                                                                                                                                                                                                                                              |
| Q9BZE2 | (68)PseudoU_synth_1(188)~(212)PseudoU_synth_1(330)                                                                                                                                                                                                                                                                                                                                                                                                                                                                        |
| Q96AK3 | (18)APOBEC_N(199)~(213)APOBEC_N(382)                                                                                                                                                                                                                                                                                                                                                                                                                                                                                      |
| P06309 | (10)V-set(115)                                                                                                                                                                                                                                                                                                                                                                                                                                                                                                            |
| Q8IY81 | (24)FtsJ(200)~(232)DUF3381(400)~(624)Spb1_C(839)                                                                                                                                                                                                                                                                                                                                                                                                                                                                          |
| Q9BZE4 | (235)NOG1(292)~(395)NOGCT(446)                                                                                                                                                                                                                                                                                                                                                                                                                                                                                            |
| O14727 | (6)CARD(89)~(130)NB-ARC(411)~(617)WD40_like(709)~(649)WD40(685)~(689)WD40(729)~(734)WD40(771)~(875)WD40(909)~(969)WD40_like(1024)~(1039)WD40(1071)~(1078)WD40(1113)~(1119)WD40(1155)~(1175)WD40(1203)                                                                                                                                                                                                                                                                                                                     |

|        |                                                                                                                                                                                                                                                                                                                                                                                                                                                                                                                                     |
|--------|-------------------------------------------------------------------------------------------------------------------------------------------------------------------------------------------------------------------------------------------------------------------------------------------------------------------------------------------------------------------------------------------------------------------------------------------------------------------------------------------------------------------------------------|
| Q9UKI8 | (459)Pkinase(734)                                                                                                                                                                                                                                                                                                                                                                                                                                                                                                                   |
| Q14978 | (624)SRP40_C(696)                                                                                                                                                                                                                                                                                                                                                                                                                                                                                                                   |
| Q8WXA9 | (68)RRM_1(136)                                                                                                                                                                                                                                                                                                                                                                                                                                                                                                                      |
| Q76MJ5 | (523)Pkinase(781)~(787)Ribonuc_2-5A(910)                                                                                                                                                                                                                                                                                                                                                                                                                                                                                            |
| O60706 | (302)ABC_membrane(585)~(688)ABC_tran(839)~(994)ABC_membrane(1252)~(1329)ABC_tran(1477)                                                                                                                                                                                                                                                                                                                                                                                                                                              |
| P01605 | (6)V-set(106)                                                                                                                                                                                                                                                                                                                                                                                                                                                                                                                       |
| O60733 | (152)Ank_3(176)~(174)Ank_2(248)~(257)Ank_2(346)~(303)Ank_5(357)~(481)Patatin(664)                                                                                                                                                                                                                                                                                                                                                                                                                                                   |
| Q8WXR4 | (28)Pkinase(293)~(346)Myosin_head(1046)                                                                                                                                                                                                                                                                                                                                                                                                                                                                                             |
| Q8WW27 | (48)APOBEC_N(208)                                                                                                                                                                                                                                                                                                                                                                                                                                                                                                                   |
| Q2M3G0 | (48)ABC_membrane(333)~(404)ABC_tran(553)~(693)ABC_membrane(965)~(1033)ABC_tran(1184)                                                                                                                                                                                                                                                                                                                                                                                                                                                |
| Q9ULH4 | (55)LRR_8(112)~(125)LRR_8(185)~(290)I-set(376)                                                                                                                                                                                                                                                                                                                                                                                                                                                                                      |
| Q9HD15 | (75)SRA1(218)                                                                                                                                                                                                                                                                                                                                                                                                                                                                                                                       |
| P01774 | (12)V-set(101)                                                                                                                                                                                                                                                                                                                                                                                                                                                                                                                      |
| Q8IXW5 | (80)RPAP2_Rtr1(152)                                                                                                                                                                                                                                                                                                                                                                                                                                                                                                                 |
| Q96BR1 | (16)PX(119)~(164)Pkinase(419)                                                                                                                                                                                                                                                                                                                                                                                                                                                                                                       |
| P35269 | (3)TFIIF_alpha(517)                                                                                                                                                                                                                                                                                                                                                                                                                                                                                                                 |
| Q6P9B9 | (29)INTS5_N(251)~(290)INTS5_C(999)                                                                                                                                                                                                                                                                                                                                                                                                                                                                                                  |
| Q9H0A6 | (127)zf-RING_2(169)~(291)zf-RING_2(352)                                                                                                                                                                                                                                                                                                                                                                                                                                                                                             |
| Q9Y3F4 | (51)WD40(87)~(92)WD40(128)~(138)WD40(170)~(255)WD40(292)                                                                                                                                                                                                                                                                                                                                                                                                                                                                            |
| Q8NB50 | (141)zf-C2H2(163)~(156)zf-H2C2_2(179)~(183)zf-H2C2_2(206)~(197)zf-C2H2_6(221)~(240)zf-H2C2_2(264)~(268)zf-H2C2_2(292)~(296)zf-H2C2_2(319)~(324)zf-H2C2_2(348)~(355)zf-H2C2_2(376)~(381)zf-H2C2_2(404)~(408)zf-H2C2_2(432)~(436)zf-H2C2_2(460)~(464)zf-H2C2_2(486)~(491)zf-H2C2_2(516)~(519)zf-H2C2_2(544)~(548)zf-H2C2_2(570)~(576)zf-H2C2_2(599)~(604)zf-H2C2_2(628)~(632)zf-H2C2_2(656)~(659)zf-H2C2_2(682)~(688)zf-H2C2_2(710)~(718)zf-H2C2_2(740)~(744)zf-H2C2_2(768)~(772)zf-H2C2_2(794)~(785)zf-C2H2(807)~(827)zf-H2C2_2(849) |
| O75533 | (286)SF3b1(327)~(329)SF3b1(451)~(581)HEAT_2(662)~(1018)HEAT_2(1106)                                                                                                                                                                                                                                                                                                                                                                                                                                                                 |
| P82933 | (274)Ribosomal_S9(396)                                                                                                                                                                                                                                                                                                                                                                                                                                                                                                              |
| Q96QS6 | (63)Pkinase(320)                                                                                                                                                                                                                                                                                                                                                                                                                                                                                                                    |
| A6QL64 | (36)Ank_2(128)~(135)Ank_2(227)~(1537)CCDC144C(1828)~(1854)CCDC144C(1937)                                                                                                                                                                                                                                                                                                                                                                                                                                                            |
| Q9H4B4 | (64)Pkinase(314)~(471)POLO_box(529)~(569)POLO_box(636)                                                                                                                                                                                                                                                                                                                                                                                                                                                                              |
| Q03938 | (6)KRAB(44)~(160)zf-H2C2_2(183)~(202)zf-C2H2(223)~(215)zf-H2C2_2(237)~(244)zf-H2C2_2(265)~(272)zf-H2C2_2(294)~(300)zf-H2C2_2(323)~(328)zf-H2C2_2(351)~(356)zf-H2C2_2(378)~(384)zf-H2C2_2(408)~(412)zf-H2C2_2(436)~(439)zf-H2C2_2(464)~(453)zf-C2H2(475)~(495)zf-H2C2_2(520)~(524)zf-H2C2_2(548)~(552)zf-H2C2_2(574)                                                                                                                                                                                                                 |
| A2RRD8 | (8)KRAB(48)~(147)zf-H2C2_2(171)~(175)zf-H2C2_2(200)~(203)zf-H2C2_2(227)~(232)zf-H2C2_2(255)~(259)zf-H2C2_2(283)~(288)zf-H2C2_2(312)~(319)zf-H2C2_2(340)~(343)zf-H2C2_2(367)~(372)zf-H2C2_2(396)~(413)zf-C2H2(435)~(427)zf-H2C2_2(451)~(441)zf-C2H2(463)~(455)zf-H2C2_2(479)                                                                                                                                                                                                                                                         |
| O60942 | (58)DSPc(172)~(272)mRNA_cap_enzyme(460)~(464)mRNA_cap_C(558)                                                                                                                                                                                                                                                                                                                                                                                                                                                                        |
| O95477 | (639)ABC2_membrane_3(841)~(917)ABC_tran(1061)~(1347)ABC2_membrane_3(1869)~(1930)ABC_tran(2072)                                                                                                                                                                                                                                                                                                                                                                                                                                      |
| Q8NEJ9 | (18)Sas10_Utp3(98)                                                                                                                                                                                                                                                                                                                                                                                                                                                                                                                  |
| Q15418 | (62)Pkinase(320)~(418)Pkinase(675)                                                                                                                                                                                                                                                                                                                                                                                                                                                                                                  |
| Q5MAI5 | (4)Pkinase(286)                                                                                                                                                                                                                                                                                                                                                                                                                                                                                                                     |
| A8MT65 | (43)KRAB(82)~(320)zf-C2H2_6(344)~(335)zf-H2C2_2(358)~(348)zf-C2H2(370)~(363)zf-H2C2_2(386)~(390)zf-H2C2_2(415)~(421)zf-H2C2_2(443)~(446)zf-H2C2_2(470)~(474)zf-H2C2_2(498)~(502)zf-H2C2_2(526)                                                                                                                                                                                                                                                                                                                                      |

|        |                                                                                                                                                                                                                                                                                     |
|--------|-------------------------------------------------------------------------------------------------------------------------------------------------------------------------------------------------------------------------------------------------------------------------------------|
| Q9ULK6 | (87)PA(180)~(277)zf-RING_2(319)                                                                                                                                                                                                                                                     |
| Q8IZU2 | (79)WD40(112)~(385)WD40(422)~(557)WD40(595)~(601)WD40(638)~(643)WD40(681)                                                                                                                                                                                                           |
| Q9BYG3 | (47)RRM_1(116)~(227)hNIFK_binding(266)                                                                                                                                                                                                                                              |
| Q9BXT6 | (40)S1-like(84)~(118)S1-like(160)~(194)S1-like(239)~(745)AAA_11(828)~(856)AAA_11(926)~(935)AAA_12(1149)                                                                                                                                                                             |
| Q96FV9 | (72)efThoc1(537)~(574)Death(651)                                                                                                                                                                                                                                                    |
| Q86SG3 | (42)RRM_1(98)~(207)RRM_1(263)                                                                                                                                                                                                                                                       |
| Q569K4 | (35)zf-met(58)~(158)zf-met(181)~(285)zf-met(309)~(348)zf-met(372)                                                                                                                                                                                                                   |
| Q7L8L6 | (432)FAST_1(499)~(512)FAST_2(602)~(700)RAP(758)                                                                                                                                                                                                                                     |
| A6NDY0 | (149)RRM_1(218)                                                                                                                                                                                                                                                                     |
| Q86YC3 | (82)LRR_8(144)~(157)LRR_8(217)~(206)LRR_4(236)~(251)LRR_4(282)~(330)LRR_8(388)~(393)LRR_8(438)~(463)LRR_8(495)~(532)LRR_8(570)                                                                                                                                                      |
| Q6P2M8 | (15)Pkinase(270)                                                                                                                                                                                                                                                                    |
| Q04759 | (160)C1_1(210)~(232)C1_1(283)~(383)Pkinase(634)                                                                                                                                                                                                                                     |
| P01816 | (9)V-set(117)                                                                                                                                                                                                                                                                       |
| Q99798 | (65)Aconitase(503)~(583)Aconitase_C(711)                                                                                                                                                                                                                                            |
| Q7L2J0 | (575)Bin3(683)                                                                                                                                                                                                                                                                      |
| P54577 | (32)tRNA-synt_1b(321)~(370)tRNA_bind(465)                                                                                                                                                                                                                                           |
| O75762 | (60)Ank_2(128)~(95)Ank_5(138)~(133)Ank_2(193)~(243)Ank_2(337)~(309)Ank_2(372)~(417)Ank_2(506)~(450)Ank_2(539)~(513)Ank_2(576)~(754)Ion_trans(971)                                                                                                                                   |
| Q14584 | (170)zf-H2C2_2(193)~(212)zf-C2H2(234)~(227)zf-H2C2_2(251)~(255)zf-H2C2_2(278)~(283)zf-H2C2_2(306)~(311)zf-H2C2_2(335)~(339)zf-H2C2_2(363)~(352)zf-C2H2(374)~(366)zf-H2C2_2(390)~(395)zf-H2C2_2(418)~(422)zf-H2C2_2(447)~(450)zf-H2C2_2(474)~(481)zf-H2C2_2(503)~(507)zf-H2C2_2(531) |
| Q9UNX4 | (68)WD40(92)~(102)WD40(135)~(142)WD40(177)~(183)WD40(219)~(486)WD40(524)~(585)WD40(618)~(623)WD40(661)~(666)WD40(702)~(805)Utp12(906)                                                                                                                                               |
| Q6NXG1 | (227)RRM_6(296)~(328)RRM_6(400)~(447)RRM_6(519)                                                                                                                                                                                                                                     |
| P20585 | (230)MutS_I(341)~(366)MutS_II(522)~(540)MutS_III(838)~(846)MutS_V(1094)                                                                                                                                                                                                             |
| Q14137 | (144)BOP1NT(402)~(408)WD40(440)~(706)WD40(745)                                                                                                                                                                                                                                      |
| P0C6S8 | (57)LRR_8(114)~(102)LRR_8(162)~(247)LRR_8(303)~(412)I-set(497)                                                                                                                                                                                                                      |
| P52741 | (64)zf-H2C2_2(87)~(176)zf-C2H2(198)~(191)zf-H2C2_2(215)~(219)zf-H2C2_2(243)~(246)zf-H2C2_2(271)~(274)zf-H2C2_2(299)~(303)zf-H2C2_2(327)~(331)zf-H2C2_2(355)~(361)zf-H2C2_2(381)~(386)zf-H2C2_2(410)                                                                                 |
| Q9P2K5 | (102)RRM_1(171)~(235)RRM_1(303)~(525)RRM_1(592)                                                                                                                                                                                                                                     |
| P63125 | (7)RVP(105)~(112)G-patch(154)                                                                                                                                                                                                                                                       |
| Q86Y79 | (32)Pept_tRNA_hydro(204)                                                                                                                                                                                                                                                            |
| P26927 | (25)PAN_1(105)~(110)Kringle(186)~(191)Kringle(268)~(283)Kringle(361)~(370)Kringle(448)~(489)Trypsin(704)                                                                                                                                                                            |
| Q8NC51 | (5)IHABP4_N(152)~(189)HABP4_PAI-RBP1(313)                                                                                                                                                                                                                                           |
| P01704 | (5)V-set(110)                                                                                                                                                                                                                                                                       |
| P0DJ4  | (10)RRM_1(79)~(174)RBM1CTR(218)                                                                                                                                                                                                                                                     |
| P53355 | (13)Pkinase(275)~(349)Ank_2(442)~(448)Ank_4(497)~(482)Ank_2(573)~(570)Ank_5(614)~(1312)Death(1392)                                                                                                                                                                                  |
| P78324 | (38)V-set(144)~(159)C1-set(236)~(262)C1-set(339)                                                                                                                                                                                                                                    |
| Q8TEB1 | (304)WD40(336)~(347)WD40(383)~(476)WD40(510)                                                                                                                                                                                                                                        |
| P01610 | (6)V-set(106)                                                                                                                                                                                                                                                                       |
| P0CW18 | (105)Trypsin(332)                                                                                                                                                                                                                                                                   |
| P63272 | (13)Spt4(90)                                                                                                                                                                                                                                                                        |
| Q16600 | (207)zf-C2H2(229)~(222)zf-H2C2_2(246)~(250)zf-H2C2_2(274)~(278)zf-H2C2_2(301)~(309)zf-H2C2_2(329)~(336)zf-H2C2_2(357)~(375)zf-C2H2(397)~(389)zf-                                                                                                                                    |

|        |                                                                                                                                                                                                                                                                                                                                                                                                   |
|--------|---------------------------------------------------------------------------------------------------------------------------------------------------------------------------------------------------------------------------------------------------------------------------------------------------------------------------------------------------------------------------------------------------|
|        | H2C2_2(413)~(418)zf-H2C2_2(441)                                                                                                                                                                                                                                                                                                                                                                   |
| Q9BSK4 | (4)Ank_2(68)~(88)Ank_2(179)~(150)Ank_4(203)~(182)Ank_2(237)~(567)Ank_5(620)                                                                                                                                                                                                                                                                                                                       |
| Q96EL2 | (36)MRP-S24(167)                                                                                                                                                                                                                                                                                                                                                                                  |
| Q96S15 | (329)WD40(366)                                                                                                                                                                                                                                                                                                                                                                                    |
| O14578 | (98)Pkinase(360)~(1445)PH(1562)~(1601)CNH(1854)                                                                                                                                                                                                                                                                                                                                                   |
| P17025 | (27)KRAB(67)~(221)zf-H2C2_2(244)~(264)zf-C2H2(284)~(279)zf-H2C2_2(299)~(308)zf-H2C2_2(329)~(318)zf-C2H2(340)~(332)zf-H2C2_2(355)~(362)zf-H2C2_2(384)~(391)zf-H2C2_2(412)~(419)zf-H2C2_2(441)~(445)zf-H2C2_2(468)~(473)zf-H2C2_2(496)~(503)zf-H2C2_2(523)~(531)zf-H2C2_2(552)~(559)zf-H2C2_2(579)~(586)zf-H2C2_2(609)                                                                              |
| Q969H0 | (281)F-box-like(325)~(374)WD40(407)~(411)WD40(447)~(451)WD40(487)~(491)WD40(527)~(532)WD40(567)~(571)WD40(607)~(611)WD40(650)                                                                                                                                                                                                                                                                     |
| Q9Y5Q5 | (139)Fz(247)~(269)Ldl_recept_a(304)~(305)Ldl_recept_a(340)~(342)Ldl_recept_a(377)~(383)Ldl_recept_a(414)~(455)Fz(564)~(579)Ldl_recept_a(614)~(616)Ldl_recept_a(652)~(655)Ldl_recept_a(689)~(802)Trypsin(1030)                                                                                                                                                                                     |
| Q9Y2Q1 | (4)KRAB(44)~(174)zf-C2H2(195)~(188)zf-H2C2_2(211)~(215)zf-H2C2_2(239)~(243)zf-H2C2_2(267)~(257)zf-C2H2(279)~(303)zf-H2C2_2(326)~(330)zf-H2C2_2(354)~(358)zf-H2C2_2(382)~(372)zf-C2H2(394)~(418)zf-H2C2_2(441)~(446)zf-H2C2_2(469)~(473)zf-H2C2_2(497)~(501)zf-H2C2_2(525)~(547)zf-C2H2(561)                                                                                                       |
| Q9ULJ7 | (549)Ank_2(640)~(617)Ank_2(706)~(707)Ank_2(777)~(786)Ank_2(874)~(877)Ank_2(943)~(954)Ank_2(1039)~(1047)Ank_4(1097)                                                                                                                                                                                                                                                                                |
| Q99729 | (1)CBFNT(69)~(72)RRM_1(138)~(155)RRM_1(215)                                                                                                                                                                                                                                                                                                                                                       |
| Q6ZMY6 | (95)WD40(130)~(148)Nup160(180)~(223)WD40(258)~(266)WD40(301)~(312)WD40(349)~(358)WD40(391)                                                                                                                                                                                                                                                                                                        |
| Q96I34 | (76)Ank_2(166)~(219)Ank_2(294)                                                                                                                                                                                                                                                                                                                                                                    |
| Q9BRX2 | (1)eRF1_1(129)~(136)eRF1_2(268)~(272)eRF1_3(370)                                                                                                                                                                                                                                                                                                                                                  |
| Q9NQ29 | (6)LUC7(244)                                                                                                                                                                                                                                                                                                                                                                                      |
| Q8N9F8 | (14)KRAB(54)~(178)zf-C2H2(200)~(233)zf-H2C2_2(254)~(258)zf-H2C2_2(281)~(287)zf-H2C2_2(310)~(314)zf-H2C2_2(338)~(343)zf-H2C2_2(365)~(370)zf-H2C2_2(393)~(399)zf-H2C2_2(421)~(426)zf-H2C2_2(450)~(454)zf-H2C2_2(477)~(482)zf-H2C2_2(506)                                                                                                                                                            |
| Q9H2K2 | (28)Ank_2(121)~(110)Ank_5(164)~(213)Ank_4(264)~(247)Ank_2(306)~(368)Ank_2(461)~(496)Ank_2(589)~(563)Ank_2(709)~(680)Ank_4(732)~(698)Ank_5(750)~(877)SAM_2(933)~(955)PARP(1156)                                                                                                                                                                                                                    |
| P01782 | (12)V-set(118)                                                                                                                                                                                                                                                                                                                                                                                    |
| Q9BZC7 | (705)ABC2_membrane_3(912)~(1007)ABC_tran(1151)~(1726)ABC2_membrane_3(2007)~(2072)ABC_tran(2213)                                                                                                                                                                                                                                                                                                   |
| Q8N442 | (66)GTP_EFTU(244)~(268)GTP_EFTU_D2(338)~(469)EFG_C(556)~(558)LepA_C(664)                                                                                                                                                                                                                                                                                                                          |
| Q6RSH7 | (43)VHL(135)                                                                                                                                                                                                                                                                                                                                                                                      |
| Q9NUX5 | (11)POT1(141)~(152)POT1PC(296)                                                                                                                                                                                                                                                                                                                                                                    |
| Q6ZQV5 | (56)zf-C2H2(78)~(126)zf-H2C2_2(149)~(155)zf-H2C2_2(177)~(184)zf-H2C2_2(205)~(210)zf-H2C2_2(232)~(239)zf-H2C2_2(262)~(267)zf-H2C2_2(291)~(308)zf-C2H2(330)~(390)zf-C2H2(412)~(404)zf-H2C2_2(427)~(446)Zn-ribbon_8(483)~(462)zf-H2C2_2(484)~(488)zf-H2C2_2(512)~(547)zf-H2C2_2(569)~(558)zf-C2H2(580)~(573)zf-H2C2_2(596)                                                                           |
| P41091 | (41)GTP_EFTU(244)~(276)GTP_EFTU_D2(358)~(370)eIF2_C(459)                                                                                                                                                                                                                                                                                                                                          |
| Q8N7K0 | (7)KRAB(47)~(118)zf-H2C2_2(152)~(158)zf-H2C2_2(179)~(170)zf-C2H2(192)~(215)zf-H2C2_2(237)~(240)zf-H2C2_2(264)~(272)zf-H2C2_2(293)~(297)zf-H2C2_2(320)~(325)zf-H2C2_2(346)~(366)zf-C2H2(388)~(380)zf-H2C2_2(404)~(409)zf-H2C2_2(432)~(437)zf-H2C2_2(461)~(450)zf-C2H2(472)~(495)zf-H2C2_2(516)~(521)zf-H2C2_2(544)~(549)zf-H2C2_2(572)~(576)zf-H2C2_2(600)~(605)zf-H2C2_2(628)~(632)zf-H2C2_2(655) |
| Q9NUQ8 | (196)ABC_tran(356)~(395)ABC_tran_Xtn(475)~(510)ABC_tran(639)                                                                                                                                                                                                                                                                                                                                      |
| Q68DC2 | (66)Ank_2(141)~(111)Ank_4(164)~(149)Ank_2(252)~(297)Ank_2(389)                                                                                                                                                                                                                                                                                                                                    |
| P08183 | (52)ABC_membrane(343)~(410)ABC_tran(559)~(712)ABC_membrane(986)~(1053)ABC_tran(1204)                                                                                                                                                                                                                                                                                                              |

|        |                                                                                                                                                                                                                                                                                                                                            |
|--------|--------------------------------------------------------------------------------------------------------------------------------------------------------------------------------------------------------------------------------------------------------------------------------------------------------------------------------------------|
| P23515 | (55)LRR_4(94)~(124)LRR_4(158)~(168)LRR_8(226)                                                                                                                                                                                                                                                                                              |
| Q86XS8 | (88)PA(166)~(263)zf-RING_2(305)                                                                                                                                                                                                                                                                                                            |
| O00267 | (75)Spt5_N(172)~(178)Spt5-NGN(264)~(276)KOW(304)~(422)KOW(450)~(475)KOW(501)~(597)KOW(619)~(707)KOW(736)~(1037)KOW(1065)                                                                                                                                                                                                                   |
| Q9H583 | (238)U3snoRNP10(353)~(923)HEAT(946)~(1513)U3snoRNP10(1593)~(1860)BP28CT(2010)~(2069)HEAT(2094)                                                                                                                                                                                                                                             |
| Q03518 | (249)ABC_membrane(518)~(581)ABC_tran(731)                                                                                                                                                                                                                                                                                                  |
| Q9Y2Q9 | (75)MRP-S35(177)                                                                                                                                                                                                                                                                                                                           |
| P42704 | (195)PPR_2(243)~(269)PPR(296)~(451)PPR_2(478)~(714)PPR(736)~(753)PPR(779)~(891)TPR_19(915)~(957)PPR(986)~(1043)PPR_2(1077)~(1103)TPR_19(1140)~(1320)PPR_2(1352)                                                                                                                                                                            |
| P10155 | (17)TROVE(369)                                                                                                                                                                                                                                                                                                                             |
| P52756 | (100)RRM_6(171)~(181)zf-RanBP(209)~(233)RRM_6(308)~(743)G-patch(787)                                                                                                                                                                                                                                                                       |
| Q9NZJ0 | (89)WD40(126)~(130)WD40(169)~(218)WD40(244)~(307)WD40(345)~(352)WD40(388)                                                                                                                                                                                                                                                                  |
| P01772 | (12)V-set(124)                                                                                                                                                                                                                                                                                                                             |
| P82921 | (11)Ribosomal_S21(64)                                                                                                                                                                                                                                                                                                                      |
| P52742 | (14)KRAB(54)~(214)zf-C2H2(236)~(229)zf-H2C2_2(253)~(256)zf-H2C2_2(280)~(287)zf-H2C2_2(308)~(313)zf-H2C2_2(336)~(340)zf-H2C2_2(365)~(368)zf-H2C2_2(393)~(399)zf-H2C2_2(420)~(425)zf-H2C2_2(449)~(452)zf-H2C2_2(476)~(480)zf-H2C2_2(505)~(508)zf-H2C2_2(532)~(539)zf-H2C2_2(560)~(566)zf-H2C2_2(589)~(592)zf-H2C2_2(616)~(620)zf-H2C2_2(645) |
| Q9H944 | (1)Med20(198)                                                                                                                                                                                                                                                                                                                              |
| P17032 | (8)KRAB(48)~(257)zf-H2C2_2(282)~(299)zf-C2H2(321)~(342)zf-H2C2_2(365)~(370)zf-H2C2_2(393)~(398)zf-H2C2_2(421)~(426)zf-H2C2_2(448)~(454)zf-H2C2_2(477)~(469)zf-C2H2(489)~(512)zf-H2C2_2(533)                                                                                                                                                |
| P28482 | (25)Pkinase(313)                                                                                                                                                                                                                                                                                                                           |
| O75083 | (47)eIF2A(97)~(184)WD40(217)~(231)WD40(262)~(311)WD40(350)~(527)WD40(559)                                                                                                                                                                                                                                                                  |
| Q9Y3A5 | (14)SBDS(100)~(107)SBDS_C(225)                                                                                                                                                                                                                                                                                                             |
| O43815 | (49)Striatin(177)~(454)WD40(491)~(507)WD40(544)~(567)WD40(597)~(696)WD40(734)~(739)WD40(777)                                                                                                                                                                                                                                               |
| Q59GN2 | (9)Ribosomal_L39(49)                                                                                                                                                                                                                                                                                                                       |
| O15523 | (202)DEAD(389)~(425)Helicase_C(534)                                                                                                                                                                                                                                                                                                        |
| Q5TBB1 | (27)RNase_H2-Ydr279(301)                                                                                                                                                                                                                                                                                                                   |
| Q9Y295 | (66)MMR_HSR1(164)~(186)MMR_HSR1_Xtn(291)~(292)TGS(366)                                                                                                                                                                                                                                                                                     |
| Q9Y2Z4 | (75)tRNA-synt_1b(374)                                                                                                                                                                                                                                                                                                                      |
| P40313 | (34)Trypsin(257)                                                                                                                                                                                                                                                                                                                           |
| A2AJT9 | (2)THRAP3_BCLAF1(643)                                                                                                                                                                                                                                                                                                                      |
| P18583 | (1909)RSRP(2109)~(2305)G-patch(2348)                                                                                                                                                                                                                                                                                                       |
| Q6S5H5 | (143)Ank_2(235)~(225)Ank_5(276)~(292)Ank_5(345)                                                                                                                                                                                                                                                                                            |
| Q9H1J1 | (68)Smg4_UPF3(225)                                                                                                                                                                                                                                                                                                                         |
| P07478 | (24)Trypsin(239)                                                                                                                                                                                                                                                                                                                           |
| Q9P1W9 | (34)Pkinase(286)                                                                                                                                                                                                                                                                                                                           |
| O75832 | (28)Ank_2(103)~(74)Ank_4(126)~(108)Ank_4(159)~(140)Ank_2(201)                                                                                                                                                                                                                                                                              |
| P01713 | (5)V-set(109)                                                                                                                                                                                                                                                                                                                              |
| Q9H5Q4 | (95)RnaAD(377)                                                                                                                                                                                                                                                                                                                             |
| Q9H156 | (89)LRR_8(146)~(400)LRR_8(459)                                                                                                                                                                                                                                                                                                             |
| Q9P013 | (1)Cwf_Cwc_15(229)                                                                                                                                                                                                                                                                                                                         |
| O60318 | (2)NupH_GANP(291)~(684)SAC3_GANP(910)~(1164)CID_GANP(1234)~(1262)MCM3A                                                                                                                                                                                                                                                                     |

|        |                                                                                                                                                                                                                                                                                                                                                                                                                                           |
|--------|-------------------------------------------------------------------------------------------------------------------------------------------------------------------------------------------------------------------------------------------------------------------------------------------------------------------------------------------------------------------------------------------------------------------------------------------|
|        | P_GANP(1976)                                                                                                                                                                                                                                                                                                                                                                                                                              |
| P49840 | (119)Pkinase(403)                                                                                                                                                                                                                                                                                                                                                                                                                         |
| Q86V81 | (108)RRM_1(176)                                                                                                                                                                                                                                                                                                                                                                                                                           |
| Q9Y399 | (84)Ribosomal_S2(180)~(188)Ribosomal_S2(259)                                                                                                                                                                                                                                                                                                                                                                                              |
| O43930 | (53)Pkinase(256)                                                                                                                                                                                                                                                                                                                                                                                                                          |
| Q96D46 | (17)NMD3(246)                                                                                                                                                                                                                                                                                                                                                                                                                             |
| Q5UIP0 | (21)Rif1_N(361)                                                                                                                                                                                                                                                                                                                                                                                                                           |
| P06681 | (39)Sushi(73)~(89)Sushi(144)~(151)Sushi(204)~(254)VWA(450)~(473)Trypsin(703)                                                                                                                                                                                                                                                                                                                                                              |
| Q9NVH0 | (97)DNA_pol_A_exo1(257)                                                                                                                                                                                                                                                                                                                                                                                                                   |
| Q13895 | (143)Bystin(430)                                                                                                                                                                                                                                                                                                                                                                                                                          |
| Q9NS91 | (248)SAP(281)                                                                                                                                                                                                                                                                                                                                                                                                                             |
| Q92625 | (8)Ank_2(137)~(151)Ank_4(202)~(214)Ank_2(277)~(699)SAM_2(759)~(769)SAM_1(830)~(962)PID(1067)                                                                                                                                                                                                                                                                                                                                              |
| Q8IX12 | (147)S1-like(204)~(479)DBC1(601)                                                                                                                                                                                                                                                                                                                                                                                                          |
| Q5VUR7 | (37)Ank_2(130)~(137)Ank_2(229)~(514)CCDC144C(805)                                                                                                                                                                                                                                                                                                                                                                                         |
| Q9UPP1 | (270)JmjC(370)                                                                                                                                                                                                                                                                                                                                                                                                                            |
| Q9UQM7 | (13)Pkinase(271)~(346)CaMKII_AD(473)                                                                                                                                                                                                                                                                                                                                                                                                      |
| P78317 | (131)zf-RING_2(177)                                                                                                                                                                                                                                                                                                                                                                                                                       |
| Q9HBT7 | (39)SCAN(126)~(163)KRAB(203)~(361)zf-C2H2(383)~(375)zf-H2C2_2(400)~(389)zf-C2H2(411)~(404)zf-H2C2_2(427)~(431)zf-H2C2_2(455)~(459)zf-H2C2_2(484)~(488)zf-H2C2_2(511)~(515)zf-H2C2_2(539)~(529)zf-C2H2(551)~(557)zf-C2H2(579)~(585)zf-C2H2(607)~(599)zf-H2C2_2(623)~(627)zf-H2C2_2(650)~(655)zf-H2C2_2(678)~(683)zf-H2C2_2(707)~(714)zf-H2C2_2(736)                                                                                        |
| O60938 | (75)LRR_8(133)~(142)LRR_8(204)~(215)LRR_8(274)~(283)LRR_4(333)                                                                                                                                                                                                                                                                                                                                                                            |
| Q13243 | (6)RRM_1(67)~(110)RRM_1(175)                                                                                                                                                                                                                                                                                                                                                                                                              |
| Q96RP9 | (45)GTP_EFTU(319)~(366)GTP_EFTU_D2(432)~(446)EFG_II(519)~(521)EFG_IV(641)~(645)EFG_C(729)                                                                                                                                                                                                                                                                                                                                                 |
| Q3MIX3 | (189)ABC1(304)                                                                                                                                                                                                                                                                                                                                                                                                                            |
| Q9HBL6 | (76)LRR_8(134)                                                                                                                                                                                                                                                                                                                                                                                                                            |
| P22612 | (44)Pkinase(298)                                                                                                                                                                                                                                                                                                                                                                                                                          |
| P01762 | (12)V-set(107)                                                                                                                                                                                                                                                                                                                                                                                                                            |
| O43818 | (139)WD40(173)~(196)WD40(226)~(232)WD40(269)~(276)WD40(311)~(317)WD40(350)                                                                                                                                                                                                                                                                                                                                                                |
| Q9UKJ3 | (41)G-patch(82)                                                                                                                                                                                                                                                                                                                                                                                                                           |
| P01715 | (4)V-set(105)                                                                                                                                                                                                                                                                                                                                                                                                                             |
| Q8IYT2 | (113)FtsJ(320)                                                                                                                                                                                                                                                                                                                                                                                                                            |
| Q6ZNG0 | (11)KRAB(50)~(213)zf-H2C2_2(234)~(224)zf-C2H2(246)~(239)zf-H2C2_2(259)~(267)zf-H2C2_2(291)~(296)zf-H2C2_2(318)~(323)zf-H2C2_2(344)~(350)zf-H2C2_2(374)~(381)zf-H2C2_2(402)                                                                                                                                                                                                                                                                |
| Q92833 | (558)JmjN(591)~(628)ARID(709)~(916)JmjC(1031)                                                                                                                                                                                                                                                                                                                                                                                             |
| Q9HCG1 | (8)KRAB(48)~(257)zf-C2H2(279)~(271)zf-H2C2_2(295)~(299)zf-H2C2_2(324)~(328)zf-H2C2_2(350)~(355)zf-H2C2_2(379)~(386)zf-H2C2_2(407)~(412)zf-H2C2_2(435)~(442)zf-H2C2_2(463)~(481)zf-C2H2(503)~(496)zf-H2C2_2(519)~(523)zf-H2C2_2(548)~(551)zf-H2C2_2(575)~(580)zf-H2C2_2(603)~(608)zf-H2C2_2(632)~(636)zf-H2C2_2(659)~(663)zf-H2C2_2(687)~(691)zf-H2C2_2(715)~(719)zf-H2C2_2(743)~(747)zf-H2C2_2(770)~(775)zf-H2C2_2(799)~(789)zf-C2H2(811) |
| Q9HBY8 | (97)Pkinase(352)                                                                                                                                                                                                                                                                                                                                                                                                                          |
| Q9H3W5 | (116)LRR_8(176)~(165)LRR_8(220)~(213)LRR_8(272)~(311)LRR_8(370)~(428)I-set(513)                                                                                                                                                                                                                                                                                                                                                           |
| Q8NHW5 | (8)Ribosomal_L10(103)~(231)Ribosomal_60s(316)                                                                                                                                                                                                                                                                                                                                                                                             |
| Q9UI38 | (119)Trypsin(353)                                                                                                                                                                                                                                                                                                                                                                                                                         |

|        |                                                                                                                                                                                                                                                        |
|--------|--------------------------------------------------------------------------------------------------------------------------------------------------------------------------------------------------------------------------------------------------------|
| O75822 | (12)eIF3_subunit(258)                                                                                                                                                                                                                                  |
| Q9NQ94 | (58)RRM_1(124)~(138)RRM_6(199)~(233)RRM_1(296)~(447)DND1_DSRM(523)                                                                                                                                                                                     |
| Q9NW64 | (248)RRM_5(302)                                                                                                                                                                                                                                        |
| P12544 | (29)Trypsin(254)                                                                                                                                                                                                                                       |
| Q9C0F3 | (14)KRAB(54)~(138)zf-C2H2(160)~(152)zf-H2C2_2(177)~(181)zf-H2C2_2(204)~(194)zf-C2H2(216)~(237)zf-H2C2_2(261)~(264)zf-H2C2_2(288)~(293)zf-H2C2_2(316)~(320)zf-H2C2_2(344)~(348)zf-H2C2_2(373)~(362)zf-C2H2(384)~(405)zf-H2C2_2(428)~(432)zf-H2C2_2(457) |
| P25490 | (298)zf-C2H2(320)~(325)zf-C2H2(347)~(340)zf-H2C2_2(365)~(369)zf-H2C2_2(395)                                                                                                                                                                            |
| O43283 | (172)Pkinase_Tyr(406)                                                                                                                                                                                                                                  |
| Q8IYP2 | (32)Trypsin(234)                                                                                                                                                                                                                                       |
| Q969Q0 | (17)Ribosomal_L44(94)                                                                                                                                                                                                                                  |
| Q9Y2H1 | (90)Pkinase(383)                                                                                                                                                                                                                                       |
| P46063 | (94)DEAD(260)~(303)Helicase_C(407)~(421)RecQ_Zn_bind(479)                                                                                                                                                                                              |
| P54132 | (1)BLM_N(367)~(372)BDHCT(411)~(425)BDHCT_assoc(647)~(671)DEAD(838)~(884)Helicase_C(984)~(995)RecQ_Zn_bind(1067)~(1072)RQC(1195)~(1217)HRDC(1281)                                                                                                       |
| O60231 | (607)Helicase_C(729)~(792)HA2(881)~(936)OB_NTP_bind(1015)                                                                                                                                                                                              |
| Q13216 | (98)WD40(128)~(176)WD40(215)~(242)WD40(273)~(325)WD40(361)                                                                                                                                                                                             |
| Q9BX68 | (64)HIT(157)                                                                                                                                                                                                                                           |
| O00241 | (37)V-set(143)~(160)C1-set(235)~(262)C1-set(338)                                                                                                                                                                                                       |
| Q96ND8 | (6)KRAB(46)~(226)zf-H2C2_2(250)~(254)zf-H2C2_2(278)~(282)zf-H2C2_2(306)~(310)zf-H2C2_2(335)~(339)zf-H2C2_2(363)~(369)zf-H2C2_2(390)~(394)zf-H2C2_2(418)~(423)zf-H2C2_2(447)~(451)zf-H2C2_2(474)~(479)zf-H2C2_2(503)~(506)zf-H2C2_2(530)                |
| P26599 | (77)RRM_5(131)~(186)RRM_1(249)~(357)RRM_5(409)~(456)RRM_6(514)                                                                                                                                                                                         |
| A6NKF1 | (109)SAC3_GANP(329)                                                                                                                                                                                                                                    |
| Q86UQ0 | (35)KRAB(74)~(265)zf-H2C2_2(285)~(291)zf-H2C2_2(314)~(319)zf-H2C2_2(341)~(332)zf-C2H2(354)                                                                                                                                                             |
| Q12770 | (308)Sterol-sensing(452)~(1073)WD40(1104)~(1110)WD40(1146)                                                                                                                                                                                             |
| Q8IYD1 | (201)GTP_EFTU(400)~(520)GTP_EFTU_D3(623)                                                                                                                                                                                                               |
| Q9H3R0 | (17)JmjN(51)~(177)JmjC(293)~(712)PHD_2(747)~(754)zf-HC5HC2H_2(864)                                                                                                                                                                                     |
| Q9UL40 | (74)zf-met(97)~(136)zf-met(158)~(186)zf-met(209)~(241)zf-met(263)                                                                                                                                                                                      |
| Q8TAF3 | (72)WD40(103)~(109)WD40(145)~(161)WD40(196)~(203)WD40(238)~(243)WD40(277)~(509)DUF3337(673)                                                                                                                                                            |
| P01743 | (27)V-set(116)                                                                                                                                                                                                                                         |
| Q9UBI6 | (13)G-gamma(72)                                                                                                                                                                                                                                        |
| O75467 | (2)KRAB(41)~(257)zf-C2H2(279)~(271)zf-H2C2_2(295)~(299)zf-H2C2_2(324)~(327)zf-H2C2_2(352)~(341)zf-C2H2(363)~(384)zf-H2C2_2(407)~(412)zf-H2C2_2(436)~(439)zf-H2C2_2(463)~(468)zf-H2C2_2(490)                                                            |
| Q9Y3B8 | (44)RNase_T(206)                                                                                                                                                                                                                                       |
| Q15843 | (6)ubiquitin(74)                                                                                                                                                                                                                                       |
| P62861 | (1)Ribosomal_S30(58)                                                                                                                                                                                                                                   |
| P07477 | (24)Trypsin(239)                                                                                                                                                                                                                                       |
| Q9H974 | (128)TGT(408)                                                                                                                                                                                                                                          |
| P21810 | (62)LRRNT(88)~(93)LRR_8(150)~(160)LRR_8(216)~(216)LRRNT(228)~(230)LRR_8(289)                                                                                                                                                                           |
| P13569 | (82)ABC_membrane(350)~(441)ABC_tran(575)~(639)CFTR_R(849)~(862)ABC_membrane(1147)~(1227)ABC_tran(1374)                                                                                                                                                 |
| P08621 | (2)U1snRNP70_N(94)~(105)RRM_1(174)                                                                                                                                                                                                                     |
| Q9H1Z4 | (210)WD40(244)                                                                                                                                                                                                                                         |

|        |                                                                                                                                                                                                                                                                                                                                                                           |
|--------|---------------------------------------------------------------------------------------------------------------------------------------------------------------------------------------------------------------------------------------------------------------------------------------------------------------------------------------------------------------------------|
| Q8N7M2 | (6)GVQW(41)~(73)KRAB(113)~(207)zf-C2H2(229)~(222)zf-H2C2_2(244)~(250)zf-H2C2_2(273)~(277)zf-H2C2_2(302)~(305)zf-H2C2_2(328)~(333)zf-H2C2_2(358)~(362)zf-H2C2_2(384)~(390)zf-H2C2_2(413)~(418)zf-H2C2_2(442)~(445)zf-H2C2_2(469)~(473)zf-H2C2_2(496)~(502)zf-H2C2_2(525)~(529)zf-H2C2_2(554)~(557)zf-H2C2_2(581)~(585)zf-H2C2_2(609)~(599)zf-C2H2(621)~(644)zf-H2C2_2(663) |
| P04206 | (6)V-set(107)                                                                                                                                                                                                                                                                                                                                                             |
| Q9HB65 | (20)ELL(118)~(291)Occludin_ELL(391)                                                                                                                                                                                                                                                                                                                                       |
| Q92887 | (324)ABC_membrane(593)~(655)ABC_tran(788)~(979)ABC_membrane(1229)~(1318)ABC_tran(1465)                                                                                                                                                                                                                                                                                    |
| Q96GW9 | (46)tRNA-synt_1g(410)                                                                                                                                                                                                                                                                                                                                                     |
| O75385 | (17)Pkinase(278)~(896)DUF3543(1044)                                                                                                                                                                                                                                                                                                                                       |
| Q66K41 | (78)zf-met(101)~(221)zf-met(245)~(290)zf-met(314)                                                                                                                                                                                                                                                                                                                         |
| Q9Y4C4 | (112)LRR_8(170)~(181)LRR_8(236)~(251)LRR_8(308)~(660)COR(732)~(796)COR(906)                                                                                                                                                                                                                                                                                               |
| Q9H4K7 | (72)GTP1_OBG(222)~(227)MMR_HSR1(346)                                                                                                                                                                                                                                                                                                                                      |
| Q8N0X2 | (392)WD40(422)~(426)WD40(464)~(469)WD40(506)~(512)WD40(548)~(596)WD40(630)                                                                                                                                                                                                                                                                                                |
| Q15415 | (10)RRM_1(79)~(174)RBM1CTR(218)                                                                                                                                                                                                                                                                                                                                           |
| Q9Y5A9 | (411)YTH(544)                                                                                                                                                                                                                                                                                                                                                             |
| Q05639 | (5)GTP_EFTU(237)~(260)GTP_EFTU_D2(325)~(335)GTP_EFTU_D3(441)                                                                                                                                                                                                                                                                                                              |
| Q2I0M4 | (72)LRR_8(131)~(169)LRR_4(201)                                                                                                                                                                                                                                                                                                                                            |
| Q69383 | (19)HERV-K_REC(105)                                                                                                                                                                                                                                                                                                                                                       |
| Q8N9W6 | (35)RRM_1(103)                                                                                                                                                                                                                                                                                                                                                            |
| A6NMK7 | (39)zf-CCCH_3(119)~(119)zf-CCCH(143)~(148)zf-CCCH(165)                                                                                                                                                                                                                                                                                                                    |
| Q7Z4S6 | (15)Kinesin(371)~(1338)WD40(1373)~(1484)WD40(1523)~(1577)WD40(1612)~(1618)WD40(1652)                                                                                                                                                                                                                                                                                      |
| P06326 | (8)V-set(112)                                                                                                                                                                                                                                                                                                                                                             |
| Q13233 | (1245)Pkinase(1508)                                                                                                                                                                                                                                                                                                                                                       |
| Q8N9N7 | (64)LRR_8(120)~(131)LRR_8(186)                                                                                                                                                                                                                                                                                                                                            |
| O94806 | (155)C1_1(205)~(272)C1_1(321)~(418)PH(496)~(580)Pkinase(832)                                                                                                                                                                                                                                                                                                              |
| P31751 | (6)PH(106)~(154)Pkinase(409)~(430)Pkinase_C(477)                                                                                                                                                                                                                                                                                                                          |
| Q15717 | (22)RRM_1(92)~(108)RRM_1(174)~(246)RRM_1(315)                                                                                                                                                                                                                                                                                                                             |
| Q9HA38 | (70)zf-met(94)~(148)zf-met(171)~(245)zf-C2H2_jaz(271)                                                                                                                                                                                                                                                                                                                     |
| Q969V6 | (26)RPEL(48)~(70)RPEL(90)~(348)SAP(380)                                                                                                                                                                                                                                                                                                                                   |
| P24723 | (10)C2(118)~(172)C1_1(225)~(246)C1_1(297)~(355)Pkinase(614)                                                                                                                                                                                                                                                                                                               |
| Q5TAX3 | (628)PAP_assoc(678)~(914)zf-CCHC(930)~(1184)PAP_assoc(1237)~(1294)zf-CCHC(1310)~(1358)zf-CCHC(1374)                                                                                                                                                                                                                                                                       |
| A4D1E9 | (15)GTP1_OBG(131)~(150)MMR_HSR1(279)                                                                                                                                                                                                                                                                                                                                      |
| Q6NYC1 | (174)JmjC(288)                                                                                                                                                                                                                                                                                                                                                            |
| Q5H9U9 | (747)DEAD(902)                                                                                                                                                                                                                                                                                                                                                            |
| B1AK53 | (41)Ank_2(131)~(142)Ank_2(233)~(206)Ank_4(260)~(236)Ank_2(302)                                                                                                                                                                                                                                                                                                            |
| Q8WTP8 | (111)RNase_T(266)                                                                                                                                                                                                                                                                                                                                                         |
| P49406 | (106)Ribosomal_L19(193)                                                                                                                                                                                                                                                                                                                                                   |
| Q8WXF1 | (84)RRM_1(148)~(158)RRM_1(216)~(229)NOPS(280)                                                                                                                                                                                                                                                                                                                             |
| Q9H0F5 | (463)zf-RING_2(504)                                                                                                                                                                                                                                                                                                                                                       |
| P02750 | (93)LRR_4(132)~(116)LRR_8(176)~(166)LRR_4(204)~(213)LRR_8(272)                                                                                                                                                                                                                                                                                                            |
| Q16531 | (75)MMS1_N(543)~(791)CPSF_A(1099)                                                                                                                                                                                                                                                                                                                                         |
| O60307 | (58)DUF1908(331)~(367)Pkinase(640)                                                                                                                                                                                                                                                                                                                                        |
| O95255 | (312)ABC_membrane(578)~(646)ABC_tran(780)~(948)ABC_membrane(1214)~(1283)ABC_tran(1430)                                                                                                                                                                                                                                                                                    |



|        |                                                                                                                                                                                                                                                                                           |
|--------|-------------------------------------------------------------------------------------------------------------------------------------------------------------------------------------------------------------------------------------------------------------------------------------------|
| Q96F86 | (103)Edc3_linker(197)~(200)FDF(300)~(305)YjeF_N(464)                                                                                                                                                                                                                                      |
| P20231 | (31)Trypsin(267)                                                                                                                                                                                                                                                                          |
| Q8N9N2 | (161)AKAP7_NLS(350)                                                                                                                                                                                                                                                                       |
| Q96SZ4 | (2)SCAN(72)~(292)zf-C2H2(315)~(336)zf-H2C2_2(359)~(377)zf-C2H2_4(399)~(423)zf-C2H2(443)~(467)zf-C2H2(489)~(481)zf-H2C2_2(505)~(510)zf-H2C2_2(533)~(537)zf-H2C2_2(561)~(565)zf-H2C2_2(589)~(593)zf-H2C2_2(618)~(621)zf-H2C2_2(645)~(635)zf-C2H2(657)~(683)zf-H2C2_2(708)~(697)zf-C2H2(719) |
| Q8TED0 | (71)WD40(108)~(114)WD40(150)~(155)WD40(193)~(204)WD40(233)~(239)WD40(275)~(343)UTP15_C(490)                                                                                                                                                                                               |
| Q7RTZ1 | (52)Trypsin(294)~(334)CUB(418)~(436)CUB(539)                                                                                                                                                                                                                                              |
| Q7Z2Y5 | (26)Pkinase(313)~(1214)CNH(1548)                                                                                                                                                                                                                                                          |
| Q9H6T0 | (259)RRM_6(328)~(360)RRM_6(432)~(477)RRM_6(549)                                                                                                                                                                                                                                           |
| Q6ZWH5 | (519)Pkinase(779)                                                                                                                                                                                                                                                                         |
| Q13568 | (16)IRF(121)~(248)IRF-3(430)                                                                                                                                                                                                                                                              |
| Q8WVM0 | (28)RrnaAD(282)                                                                                                                                                                                                                                                                           |
| P20151 | (25)Trypsin(253)                                                                                                                                                                                                                                                                          |
| P0C7P1 | (10)RRM_1(79)~(174)RBM1CTR(218)                                                                                                                                                                                                                                                           |
| O43623 | (128)zf-C2H2(150)~(159)zf-C2H2(181)~(186)zf-C2H2(207)~(200)zf-H2C2_2(223)~(227)zf-H2C2_2(252)                                                                                                                                                                                             |
| Q96I59 | (137)tRNA-synt_2(470)                                                                                                                                                                                                                                                                     |
| Q8WYQ5 | (514)dsrm(576)~(620)dsrm(684)                                                                                                                                                                                                                                                             |
| Q8TAE8 | (1)CR6_interact(209)                                                                                                                                                                                                                                                                      |
| Q96KX0 | (22)Lys(144)                                                                                                                                                                                                                                                                              |
| Q96P53 | (191)WD40(227)~(237)WD40(270)~(284)FYVE(351)~(366)WD40(394)                                                                                                                                                                                                                               |
| Q15050 | (32)RRS1(193)                                                                                                                                                                                                                                                                             |
| P01613 | (6)V-set(96)                                                                                                                                                                                                                                                                              |
| Q8IV48 | (132)RNase_T(305)                                                                                                                                                                                                                                                                         |
| Q96MM3 | (204)zf-H2C2_2(227)~(217)zf-C2H2(239)~(232)zf-H2C2_2(257)~(261)zf-H2C2_2(286)                                                                                                                                                                                                             |
| P01877 | (18)C1-set(94)~(123)C1-set(202)~(223)C1-set(308)                                                                                                                                                                                                                                          |
| Q96JY0 | (2)HMG_box_2(71)~(130)Maelstrom(326)                                                                                                                                                                                                                                                      |
| O95342 | (63)ABC_membrane(370)~(438)ABC_tran(586)~(757)ABC_membrane(1026)~(1096)ABC_tran(1247)                                                                                                                                                                                                     |
| Q04206 | (21)RHD_DNA_bind(186)~(195)RHD_dimer(291)                                                                                                                                                                                                                                                 |
| Q8TA94 | (4)KRAB(41)~(169)zf-C2H2(188)~(212)zf-H2C2_2(234)~(239)zf-H2C2_2(261)~(269)zf-H2C2_2(291)~(295)zf-H2C2_2(320)~(324)zf-H2C2_2(347)~(353)zf-H2C2_2(374)~(380)zf-H2C2_2(404)~(409)zf-H2C2_2(429)~(436)zf-H2C2_2(460)                                                                         |
| Q96PN8 | (10)Pkinase(265)                                                                                                                                                                                                                                                                          |
| Q9BV44 | (198)THUMP(284)~(294)UPF0020(476)                                                                                                                                                                                                                                                         |
| A6NJL1 | (40)SCAN(121)~(370)zf-H2C2_2(393)~(397)zf-H2C2_2(422)~(426)zf-H2C2_2(450)~(453)zf-H2C2_2(477)                                                                                                                                                                                             |
| Q5JQF8 | (4)RRM_1(74)~(92)RRM_1(159)                                                                                                                                                                                                                                                               |
| Q8N6Y2 | (106)LRR_8(163)~(293)LRR_8(350)                                                                                                                                                                                                                                                           |
| P49770 | (29)IF-2B(333)                                                                                                                                                                                                                                                                            |
| P98169 | (271)zf-C2H2(295)~(304)zf-C2H2(328)~(336)zf-C2H2(358)~(350)zf-H2C2_2(374)~(364)zf-C2H2(386)~(368)zf-C2H2_8(414)~(441)zf-H2C2_2(462)~(484)zf-C2H2(508)~(516)zf-C2H2_aberr(589)                                                                                                             |
| Q6S5H4 | (143)Ank_2(236)~(225)Ank_5(276)~(286)Ank_2(360)~(526)CCDC144C(579)                                                                                                                                                                                                                        |
| O15440 | (179)ABC_membrane(446)~(578)ABC_tran(712)~(860)ABC_membrane(1141)~(1210)ABC_tran(1358)                                                                                                                                                                                                    |

|        |                                                                                                                                                                                                                                                                                                                                                                                                                                   |
|--------|-----------------------------------------------------------------------------------------------------------------------------------------------------------------------------------------------------------------------------------------------------------------------------------------------------------------------------------------------------------------------------------------------------------------------------------|
| Q14240 | (58)DEAD(222)~(259)Helicase_C(368)                                                                                                                                                                                                                                                                                                                                                                                                |
| P22102 | (4)GARS_N(104)~(105)GARS_A(298)~(334)GARS_C(424)~(492)AIRS(592)~(607)AIRS_C(776)~(809)Formyl_trans_N(988)                                                                                                                                                                                                                                                                                                                         |
| Q9BZC1 | (56)RRM_1(123)~(154)RRM_1(216)~(442)RRM_1(473)                                                                                                                                                                                                                                                                                                                                                                                    |
| Q9UEG4 | (150)zf-C2H2(172)~(192)zf-H2C2_2(216)~(220)zf-H2C2_2(245)~(248)zf-H2C2_2(272)~(277)zf-H2C2_2(300)~(318)zf-C2H2(340)~(333)zf-H2C2_2(357)~(361)zf-H2C2_2(384)~(389)zf-H2C2_2(412)~(402)zf-C2H2(424)~(445)zf-H2C2_2(467)~(473)zf-H2C2_2(496)~(486)zf-C2H2(508)~(500)zf-H2C2_2(524)~(569)zf-C2H2_jaz(589)~(662)zf-C2H2_4(684)~(714)zf-C2H2(736)~(768)zf-C2H2(790)~(842)zf-C2H2_6(865)                                                 |
| Q9BZR6 | (61)LRR_8(115)~(125)LRR_5(232)~(156)LRR_8(213)                                                                                                                                                                                                                                                                                                                                                                                    |
| Q9NWZ3 | (190)Pkinase_Tyr(454)                                                                                                                                                                                                                                                                                                                                                                                                             |
| P36578 | (22)Ribosomal_L4(262)~(275)Ribos_L4_asso_C(348)                                                                                                                                                                                                                                                                                                                                                                                   |
| P58546 | (6)Ank_2(96)                                                                                                                                                                                                                                                                                                                                                                                                                      |
| P63127 | (7)RVP(105)~(112)G-patch(154)                                                                                                                                                                                                                                                                                                                                                                                                     |
| O75094 | (33)LRRNT(60)~(62)LRR_8(121)~(110)LRR_8(169)~(240)LRRCT(264)~(280)LRRNT(306)~(321)LRR_5(436)~(332)LRR_8(391)~(462)LRRCT(486)~(505)LRRNT(531)~(552)LRR_5(663)~(582)LRR_8(641)~(687)LRRCT(712)~(725)LRRNT(751)~(777)LRR_5(855)~(799)LRR_8(859)~(882)LRRCT(906)~(920)EGF(950)~(959)EGF(992)~(1000)EGF(1029)~(1038)EGF(1069)~(1078)EGF(1107)~(1123)EGF(1153)~(1187)Laminin_G_2(1313)~(1352)hEGF(1364)~(1372)EGF(1400)~(1412)EGF(1442) |
| Q6A1A2 | (56)Pkinase(303)                                                                                                                                                                                                                                                                                                                                                                                                                  |
| Q8TBZ8 | (5)KRAB(44)~(117)zf-H2C2_2(152)~(156)zf-H2C2_2(178)~(184)zf-H2C2_2(207)~(213)zf-H2C2_2(234)~(240)zf-H2C2_2(263)~(268)zf-H2C2_2(290)~(295)zf-H2C2_2(318)~(325)zf-H2C2_2(348)~(351)zf-H2C2_2(374)~(380)zf-H2C2_2(403)~(408)zf-H2C2_2(430)~(437)zf-H2C2_2(459)~(465)zf-H2C2_2(488)~(493)zf-H2C2_2(516)                                                                                                                               |
| Q8NFD2 | (28)Pkinase_Tyr(282)~(414)Ank_2(489)~(432)Ank_2(523)~(496)Ank_4(545)~(564)Ank_2(654)~(625)Ank_2(689)~(678)Ank_5(732)                                                                                                                                                                                                                                                                                                              |
| Q9Y463 | (111)Pkinase(431)                                                                                                                                                                                                                                                                                                                                                                                                                 |
| Q6PEZ8 | (77)LRR_8(136)~(146)LRR_8(207)~(216)LRR_8(278)~(287)LRR_8(349)~(358)LRR_8(420)~(430)LRR_8(482)                                                                                                                                                                                                                                                                                                                                    |
| Q9H000 | (3)Torus(31)~(36)zf-CCCH(55)~(169)zf-CCCH(191)~(326)zf-CCCH_2(348)                                                                                                                                                                                                                                                                                                                                                                |
| Q93062 | (26)RRM_1(87)                                                                                                                                                                                                                                                                                                                                                                                                                     |
| O00506 | (20)Pkinase(270)                                                                                                                                                                                                                                                                                                                                                                                                                  |
| P0CG38 | (143)Ank_2(235)~(225)Ank_5(276)~(292)Ank_5(345)~(648)CCDC144C(701)~(703)Actin(1075)                                                                                                                                                                                                                                                                                                                                               |
| Q9NV06 | (59)WD40(95)~(100)WD40(137)~(280)WD40(309)~(327)WD40(353)~(354)Sof1(440)                                                                                                                                                                                                                                                                                                                                                          |
| P06730 | (38)IF4E(198)                                                                                                                                                                                                                                                                                                                                                                                                                     |
| Q9HCK5 | (18)ArgoN(155)~(166)ArgoL1(216)~(232)PAZ(355)~(365)ArgoL2(412)~(421)ArgoMid(501)~(509)Piwi(819)                                                                                                                                                                                                                                                                                                                                   |
| Q9NYS7 | (120)WD40(138)~(146)WD40(182)~(187)WD40(225)~(231)WD40(267)~(291)WD40(320)~(338)WD40(360)                                                                                                                                                                                                                                                                                                                                         |
| Q9GZY0 | (122)Tap-RNA_bind(204)~(392)NTF2(540)~(574)TAP_C(622)                                                                                                                                                                                                                                                                                                                                                                             |
| Q15633 | (31)dsrm(95)~(160)dsrm(222)                                                                                                                                                                                                                                                                                                                                                                                                       |
| Q9H0K6 | (15)TruD(44)~(295)TruD(696)                                                                                                                                                                                                                                                                                                                                                                                                       |
| Q9BTL3 | (10)RAM(87)                                                                                                                                                                                                                                                                                                                                                                                                                       |
| Q96NI6 | (64)LRR_5(195)~(288)I-set(374)                                                                                                                                                                                                                                                                                                                                                                                                    |
| P78332 | (458)RRM_6(522)~(658)RRM_6(733)                                                                                                                                                                                                                                                                                                                                                                                                   |
| O75683 | (140)SURF6(348)                                                                                                                                                                                                                                                                                                                                                                                                                   |
| Q9Y467 | (387)zf-H2C2_2(412)~(645)zf-H2C2_2(670)~(693)zf-C2H2(713)~(925)zf-H2C2_2(949)                                                                                                                                                                                                                                                                                                                                                     |
| Q96SL8 | (37)zf-H2C2_2(62)~(65)zf-H2C2_2(88)~(95)zf-H2C2_2(117)~(228)zf-C2H2(250)~(428)zf-H2C2_2(453)~(470)zf-C2H2(492)                                                                                                                                                                                                                                                                                                                    |
| Q92901 | (1)Ribosomal_L3(375)                                                                                                                                                                                                                                                                                                                                                                                                              |

|        |                                                                                                                                                                                                                                                                                                                                                                                                                                                                                                                                                                                                                     |
|--------|---------------------------------------------------------------------------------------------------------------------------------------------------------------------------------------------------------------------------------------------------------------------------------------------------------------------------------------------------------------------------------------------------------------------------------------------------------------------------------------------------------------------------------------------------------------------------------------------------------------------|
| P55081 | (190)MFAP1(399)                                                                                                                                                                                                                                                                                                                                                                                                                                                                                                                                                                                                     |
| Q8N4W9 | (24)KRAB(61)~(246)zf-H2C2_2(270)~(274)zf-H2C2_2(298)~(301)zf-H2C2_2(325)~(329)zf-H2C2_2(353)~(357)zf-H2C2_2(381)~(386)zf-H2C2_2(410)~(413)zf-H2C2_2(437)~(442)zf-H2C2_2(465)~(470)zf-H2C2_2(494)~(498)zf-H2C2_2(522)~(525)zf-H2C2_2(548)~(554)zf-H2C2_2(577)~(567)zf-C2H2(589)~(581)zf-H2C2_2(605)~(609)zf-H2C2_2(633)~(638)zf-H2C2_2(662)~(665)zf-H2C2_2(689)~(696)zf-H2C2_2(718)~(721)zf-H2C2_2(745)~(750)zf-H2C2_2(774)~(777)zf-H2C2_2(801)~(806)zf-H2C2_2(829)~(833)zf-H2C2_2(858)~(861)zf-H2C2_2(885)                                                                                                          |
| P53350 | (53)Pkinase(305)~(418)POLO_box(479)~(516)POLO_box(583)                                                                                                                                                                                                                                                                                                                                                                                                                                                                                                                                                              |
| Q3KP31 | (4)KRAB(44)~(100)zf-C2H2(122)~(114)zf-H2C2_2(143)~(147)zf-H2C2_2(169)~(175)zf-H2C2_2(196)~(202)zf-H2C2_2(226)~(232)zf-H2C2_2(253)~(261)zf-H2C2_2(281)~(287)zf-H2C2_2(309)~(317)zf-H2C2_2(338)~(342)zf-H2C2_2(367)~(371)zf-H2C2_2(395)~(398)zf-H2C2_2(421)~(426)zf-H2C2_2(449)~(454)zf-H2C2_2(478)~(484)zf-H2C2_2(505)~(513)zf-H2C2_2(534)~(553)zf-C2H2(574)                                                                                                                                                                                                                                                         |
| P98175 | (131)RRM_6(197)~(302)RRM_6(378)~(859)G-patch(902)                                                                                                                                                                                                                                                                                                                                                                                                                                                                                                                                                                   |
| Q15652 | (2382)JmjC(2481)                                                                                                                                                                                                                                                                                                                                                                                                                                                                                                                                                                                                    |
| O43345 | (4)KRAB(44)~(221)zf-H2C2_2(239)~(244)zf-H2C2_2(267)~(272)zf-H2C2_2(295)~(300)zf-H2C2_2(323)~(330)zf-H2C2_2(351)~(356)zf-H2C2_2(379)~(384)zf-H2C2_2(407)~(412)zf-H2C2_2(434)~(439)zf-H2C2_2(463)~(468)zf-H2C2_2(490)~(511)zf-H2C2_2(536)~(540)zf-H2C2_2(563)~(568)zf-H2C2_2(591)~(597)zf-H2C2_2(619)~(624)zf-H2C2_2(646)~(652)zf-H2C2_2(675)~(680)zf-H2C2_2(702)~(707)zf-H2C2_2(732)~(736)zf-H2C2_2(759)~(764)zf-H2C2_2(787)~(793)zf-H2C2_2(815)~(820)zf-H2C2_2(843)~(848)zf-H2C2_2(871)~(876)zf-H2C2_2(899)~(904)zf-H2C2_2(927)~(945)zf-C2H2(967)~(1003)zf-C2H2_8(1048)~(1087)zf-C2H2_8(1134)~(1194)zf-C2H2_8(1245) |
| Q9H7R0 | (29)KRAB(69)~(181)zf-C2H2(201)~(224)zf-H2C2_2(246)~(252)zf-H2C2_2(274)~(280)zf-H2C2_2(303)~(307)zf-H2C2_2(332)~(336)zf-H2C2_2(359)~(363)zf-H2C2_2(385)~(392)zf-H2C2_2(414)~(423)zf-H2C2_2(442)~(447)zf-H2C2_2(469)~(475)zf-H2C2_2(498)~(503)zf-H2C2_2(527)~(530)zf-H2C2_2(554)~(559)zf-H2C2_2(583)~(587)zf-H2C2_2(608)                                                                                                                                                                                                                                                                                              |
| P01598 | (6)V-set(106)                                                                                                                                                                                                                                                                                                                                                                                                                                                                                                                                                                                                       |
| Q02386 | (8)KRAB(48)~(192)zf-C2H2(214)~(276)zf-C2H2(298)~(291)zf-H2C2_2(314)~(319)zf-H2C2_2(343)~(346)zf-H2C2_2(370)~(374)zf-H2C2_2(397)~(402)zf-H2C2_2(427)~(431)zf-H2C2_2(454)~(458)zf-H2C2_2(483)~(486)zf-H2C2_2(510)~(514)zf-H2C2_2(538)~(543)zf-H2C2_2(565)~(570)zf-H2C2_2(594)~(599)zf-H2C2_2(622)~(627)zf-H2C2_2(650)                                                                                                                                                                                                                                                                                                 |
| Q9NXT0 | (15)KRAB(55)~(82)zf-H2C2_2(99)~(111)zf-H2C2_2(132)~(140)zf-H2C2_2(160)~(172)zf-H2C2_2(188)~(193)zf-H2C2_2(217)~(206)zf-C2H2(228)~(221)zf-H2C2_2(244)~(249)zf-H2C2_2(272)~(276)zf-H2C2_2(300)~(317)zf-C2H2(339)~(332)zf-H2C2_2(355)~(360)zf-H2C2_2(384)~(373)zf-C2H2(395)                                                                                                                                                                                                                                                                                                                                            |
| Q5TEC3 | (191)zf-C2H2(211)~(261)zf-C2H2(283)~(303)zf-H2C2_2(327)~(367)zf-H2C2_2(391)~(395)zf-H2C2_2(419)~(424)zf-H2C2_2(447)~(451)zf-H2C2_2(475)~(480)zf-H2C2_2(502)~(507)zf-H2C2_2(531)                                                                                                                                                                                                                                                                                                                                                                                                                                     |
| Q9H9E1 | (176)Ank_2(243)~(234)Ank_5(288)                                                                                                                                                                                                                                                                                                                                                                                                                                                                                                                                                                                     |
| Q9Y3A2 | (13)Utp11(253)                                                                                                                                                                                                                                                                                                                                                                                                                                                                                                                                                                                                      |
| Q9Y2T7 | (96)CSD(162)                                                                                                                                                                                                                                                                                                                                                                                                                                                                                                                                                                                                        |
| Q9P286 | (10)PBD(63)~(454)Pkinase(700)                                                                                                                                                                                                                                                                                                                                                                                                                                                                                                                                                                                       |
| P05388 | (8)Ribosomal_L10(103)~(231)Ribosomal_60s(316)                                                                                                                                                                                                                                                                                                                                                                                                                                                                                                                                                                       |
| O75123 | (137)zf-H2C2_2(161)~(165)zf-H2C2_2(189)~(194)zf-H2C2_2(216)~(222)zf-H2C2_2(245)~(250)zf-H2C2_2(272)~(263)zf-C2H2(285)~(306)zf-H2C2_2(328)~(336)zf-H2C2_2(357)~(361)zf-H2C2_2(384)~(390)zf-H2C2_2(413)~(417)zf-H2C2_2(440)~(446)zf-H2C2_2(468)~(459)zf-C2H2(481)                                                                                                                                                                                                                                                                                                                                                     |
| O15054 | (1377)JmjC(1485)                                                                                                                                                                                                                                                                                                                                                                                                                                                                                                                                                                                                    |
| Q15759 | (27)Pkinase(308)                                                                                                                                                                                                                                                                                                                                                                                                                                                                                                                                                                                                    |
| P54819 | (20)ADK(205)                                                                                                                                                                                                                                                                                                                                                                                                                                                                                                                                                                                                        |
| P12081 | (7)WHEP-TRS(46)~(61)tRNA-synt_His(389)~(410)HGTP_anticonodon(500)                                                                                                                                                                                                                                                                                                                                                                                                                                                                                                                                                   |
| P01712 | (6)V-set(110)                                                                                                                                                                                                                                                                                                                                                                                                                                                                                                                                                                                                       |

|        |                                                                                                                                                                                                                                                                                                                |
|--------|----------------------------------------------------------------------------------------------------------------------------------------------------------------------------------------------------------------------------------------------------------------------------------------------------------------|
| Q9Y2Z2 | (38)GIDA(460)~(463)GIDA_assoc(683)                                                                                                                                                                                                                                                                             |
| Q96PK6 | (3)RRM_1(60)~(81)RRM_1(142)                                                                                                                                                                                                                                                                                    |
| P01619 | (6)V-set(107)                                                                                                                                                                                                                                                                                                  |
| O95271 | (186)Ank_2(279)~(273)Ank_5(322)~(339)Ank_2(432)~(432)Ank_5(475)~(494)Ank_2(587)~(559)Ank_4(611)~(655)Ank_2(747)~(754)Ank_2(867)~(838)Ank_4(890)~(896)Ank_5(943)~(1030)SAM_2(1086)~(1111)PARP(1309)                                                                                                             |
| P06887 | (6)V-set(111)                                                                                                                                                                                                                                                                                                  |
| P18136 | (26)V-set(127)                                                                                                                                                                                                                                                                                                 |
| Q6ZWK6 | (60)SEA(158)~(209)Trypsin(432)                                                                                                                                                                                                                                                                                 |
| Q9UKF6 | (23)Lactamase_B(191)~(246)Beta-Casp(367)~(381)RMMBL(421)~(478)CPSF73-100_C(680)                                                                                                                                                                                                                                |
| O60832 | (49)DKCLD(106)~(110)TruB_N(226)~(227)TruB_C_2(293)~(297)PUA(370)                                                                                                                                                                                                                                               |
| P07910 | (18)RRM_1(80)                                                                                                                                                                                                                                                                                                  |
| Q6PJ69 | (12)zf-C3HC4(50)                                                                                                                                                                                                                                                                                               |
| Q9UJK0 | (60)RLI(91)~(96)DUF367(222)                                                                                                                                                                                                                                                                                    |
| P01814 | (7)V-set(124)                                                                                                                                                                                                                                                                                                  |
| P63131 | (7)RVP(105)~(112)G-patch(154)                                                                                                                                                                                                                                                                                  |
| Q9H0L4 | (18)RRM_1(88)~(113)CSTF2_hinge(191)~(572)CSTF_C(612)                                                                                                                                                                                                                                                           |
| Q9BSD7 | (4)NTPase_1(181)                                                                                                                                                                                                                                                                                               |
| Q8TF50 | (140)zf-C2H2(163)~(305)zf-C2H2(327)~(332)zf-C2H2(354)~(346)zf-H2C2_2(371)~(443)zf-C2H2(465)~(443)zf-C2H2_4(465)~(487)zf-H2C2_2(510)~(514)zf-H2C2_2(539)~(573)zf-C2H2(595)                                                                                                                                      |
| P61575 | (19)HERV-K_REC(105)                                                                                                                                                                                                                                                                                            |
| Q96LW2 | (113)Pkinase(271)                                                                                                                                                                                                                                                                                              |
| P22087 | (88)Fibrillarin(314)                                                                                                                                                                                                                                                                                           |
| Q6AZW8 | (50)zf-C2H2(72)~(64)zf-H2C2_2(89)~(92)zf-H2C2_2(116)~(120)zf-H2C2_2(145)~(149)zf-H2C2_2(173)~(162)zf-C2H2(184)~(208)zf-H2C2_2(227)~(233)zf-H2C2_2(257)~(260)zf-H2C2_2(284)~(292)zf-H2C2_2(312)                                                                                                                 |
| Q9HCX3 | (14)KRAB(54)~(266)zf-H2C2_2(289)~(293)zf-H2C2_2(318)~(307)zf-C2H2(329)~(349)zf-H2C2_2(374)~(378)zf-H2C2_2(401)~(391)zf-C2H2(413)~(434)zf-H2C2_2(457)~(462)zf-H2C2_2(486)~(490)zf-H2C2_2(514)~(503)zf-C2H2(525)~(517)zf-H2C2_2(542)~(531)zf-C2H2(553)~(573)zf-H2C2_2(598)~(605)zf-H2C2_2(625)~(615)zf-C2H2(637) |
| O95163 | (1)IKI3(954)                                                                                                                                                                                                                                                                                                   |
| Q12904 | (157)tRNA_bind(249)                                                                                                                                                                                                                                                                                            |
| Q9NYH9 | (9)U3_assoc_6(91)                                                                                                                                                                                                                                                                                              |
| O75582 | (49)Pkinase(318)~(429)Pkinase(686)                                                                                                                                                                                                                                                                             |
| Q9Y606 | (90)PseudoU_synth_1(185)~(239)PseudoU_synth_1(340)                                                                                                                                                                                                                                                             |
| Q14392 | (52)LRR_8(109)~(149)LRR_8(209)~(197)LRR_4(232)~(245)LRR_8(277)~(316)LRR_8(375)~(385)LRR_8(421)~(444)LRR_8(503)~(516)LRR_8(573)                                                                                                                                                                                 |
| Q9H6B1 | (81)zf-met(104)~(204)zf-met(228)~(267)zf-met(291)                                                                                                                                                                                                                                                              |
| Q3MJ13 | (455)WD40(495)~(548)WD40(584)                                                                                                                                                                                                                                                                                  |
| Q9GZN4 | (50)Trypsin(285)                                                                                                                                                                                                                                                                                               |
| Q14160 | (36)LRR_8(94)~(128)LRR_8(186)~(197)LRR_8(255)~(289)LRR_4(327)~(337)LRR_8(391)~(730)PDZ(811)~(868)PDZ(946)~(1005)PDZ(1089)~(1103)PDZ(1188)                                                                                                                                                                      |
| Q16644 | (47)Pkinase(304)                                                                                                                                                                                                                                                                                               |
| Q96M93 | (97)dsrm(162)~(249)A_deamin(567)                                                                                                                                                                                                                                                                               |
| Q9NYF8 | (108)THRAP3_BCLAF1(762)                                                                                                                                                                                                                                                                                        |
| Q6NXT1 | (119)Ank_2(206)                                                                                                                                                                                                                                                                                                |
| Q12996 | (49)Suf(108)~(375)Suf(649)                                                                                                                                                                                                                                                                                     |

|        |                                                                                                                                                                                                                                                                                                                                                                                                                                                                                                                                                                        |
|--------|------------------------------------------------------------------------------------------------------------------------------------------------------------------------------------------------------------------------------------------------------------------------------------------------------------------------------------------------------------------------------------------------------------------------------------------------------------------------------------------------------------------------------------------------------------------------|
| Q9BRS8 | (97)La(153)                                                                                                                                                                                                                                                                                                                                                                                                                                                                                                                                                            |
| O75792 | (31)RNase_HII(240)                                                                                                                                                                                                                                                                                                                                                                                                                                                                                                                                                     |
| Q6P2D0 | (8)KRAB(47)~(201)zf-H2C2_2(223)~(226)zf-H2C2_2(251)~(240)zf-C2H2(262)~(254)zf-H2C2_2(278)~(283)zf-H2C2_2(305)~(310)zf-H2C2_2(333)~(341)zf-H2C2_2(362)~(367)zf-H2C2_2(391)                                                                                                                                                                                                                                                                                                                                                                                              |
| Q9BWJ5 | (3)SF3b10(79)                                                                                                                                                                                                                                                                                                                                                                                                                                                                                                                                                          |
| Q8WWZ4 | (90)ABC2_membrane_3(329)~(410)ABC_tran(556)~(924)ABC2_membrane_3(1130)~(1223)ABC_tran(1367)                                                                                                                                                                                                                                                                                                                                                                                                                                                                            |
| Q96I24 | (79)KH_1(141)~(165)KH_1(228)~(256)KH_1(317)~(357)KH_1(421)                                                                                                                                                                                                                                                                                                                                                                                                                                                                                                             |
| B4DU55 | (14)KRAB(54)~(218)zf-H2C2_2(242)~(246)zf-H2C2_2(270)~(278)zf-H2C2_2(298)~(302)zf-H2C2_2(326)~(331)zf-H2C2_2(355)~(359)zf-H2C2_2(383)~(387)zf-H2C2_2(410)~(415)zf-H2C2_2(438)~(443)zf-H2C2_2(467)~(472)zf-H2C2_2(494)~(499)zf-H2C2_2(522)~(526)zf-H2C2_2(550)                                                                                                                                                                                                                                                                                                           |
| P01763 | (12)V-set(112)                                                                                                                                                                                                                                                                                                                                                                                                                                                                                                                                                         |
| Q5T7N3 | (24)KN_motif(62)~(828)Ank_2(926)~(900)Ank_2(985)                                                                                                                                                                                                                                                                                                                                                                                                                                                                                                                       |
| Q9HAU5 | (169)MIF4G(411)~(574)MIF4G(757)~(777)MIF4G(986)~(1056)Upf2(1218)                                                                                                                                                                                                                                                                                                                                                                                                                                                                                                       |
| Q5JSH3 | (504)WD40(538)~(599)WD40(633)~(639)WD40(676)~(789)WD40(814)                                                                                                                                                                                                                                                                                                                                                                                                                                                                                                            |
| Q9UBE8 | (141)Pkinase(427)                                                                                                                                                                                                                                                                                                                                                                                                                                                                                                                                                      |
| Q6ZW76 | (39)Ank_2(132)~(88)Ank_5(139)~(135)Ank_4(189)~(427)SAM_1(485)                                                                                                                                                                                                                                                                                                                                                                                                                                                                                                          |
| P62826 | (12)Ras(168)                                                                                                                                                                                                                                                                                                                                                                                                                                                                                                                                                           |
| O94768 | (36)Pkinase(293)                                                                                                                                                                                                                                                                                                                                                                                                                                                                                                                                                       |
| Q6UN15 | (154)Fip1(196)                                                                                                                                                                                                                                                                                                                                                                                                                                                                                                                                                         |
| P43243 | (415)RRM_5(471)~(514)RRM_5(569)                                                                                                                                                                                                                                                                                                                                                                                                                                                                                                                                        |
| P52298 | (42)RRM_1(112)                                                                                                                                                                                                                                                                                                                                                                                                                                                                                                                                                         |
| Q9BZK7 | (6)LisH(32)~(164)WD40(197)~(201)eIF2A(326)~(340)WD40(377)~(382)WD40(428)~(434)WD40(470)                                                                                                                                                                                                                                                                                                                                                                                                                                                                                |
| Q96SE7 | (8)KRAB(48)~(275)zf-H2C2_2(300)~(317)zf-C2H2(339)~(332)zf-H2C2_2(355)~(359)zf-H2C2_2(382)~(388)zf-H2C2_2(411)~(415)zf-H2C2_2(438)~(457)zf-C2H2(479)~(471)zf-H2C2_2(494)~(499)zf-H2C2_2(523)~(513)zf-C2H2(535)~(555)zf-H2C2_2(579)~(583)zf-H2C2_2(608)~(597)zf-C2H2(619)~(639)zf-H2C2_2(663)~(667)zf-H2C2_2(691)~(696)zf-H2C2_2(719)~(723)zf-H2C2_2(747)~(751)zf-H2C2_2(775)~(765)zf-C2H2(787)~(780)zf-H2C2_2(796)~(794)zf-C2H2(812)                                                                                                                                    |
| P42285 | (143)DEAD(287)~(582)rRNA_proc-arch(841)~(868)DSHCT(1037)                                                                                                                                                                                                                                                                                                                                                                                                                                                                                                               |
| Q8TD23 | (4)KRAB(44)~(172)zf-C2H2(192)~(215)zf-H2C2_2(238)~(256)zf-C2H2(278)~(270)zf-H2C2_2(294)~(298)zf-H2C2_2(323)~(327)zf-H2C2_2(350)~(355)zf-H2C2_2(378)~(382)zf-H2C2_2(407)~(410)zf-H2C2_2(434)~(439)zf-H2C2_2(461)~(467)zf-H2C2_2(491)~(494)zf-H2C2_2(519)~(523)zf-H2C2_2(546)                                                                                                                                                                                                                                                                                            |
| Q9NWT8 | (127)DUF1713(157)                                                                                                                                                                                                                                                                                                                                                                                                                                                                                                                                                      |
| Q9H814 | (230)RNA_GG_bind(312)                                                                                                                                                                                                                                                                                                                                                                                                                                                                                                                                                  |
| Q6ZN55 | (126)zf-C2H2_jaz(148)~(310)zf-met(332)~(336)zf-C2H2_4(358)~(350)zf-H2C2_2(375)~(481)zf-H2C2_2(505)~(495)zf-C2H2(517)~(510)zf-H2C2_2(533)~(537)zf-H2C2_2(562)~(594)zf-H2C2_2(616)~(622)zf-H2C2_2(645)~(752)zf-H2C2_2(776)~(780)zf-H2C2_2(804)~(809)zf-H2C2_2(831)                                                                                                                                                                                                                                                                                                       |
| Q9Y2W1 | (123)THRAP3_BCLAF1(791)                                                                                                                                                                                                                                                                                                                                                                                                                                                                                                                                                |
| O00442 | (13)RTC(337)                                                                                                                                                                                                                                                                                                                                                                                                                                                                                                                                                           |
| P46531 | (24)EGF_2(57)~(63)EGF(96)~(106)EGF(136)~(144)EGF(174)~(178)EGF_CA(213)~(222)EGF(252)~(261)EGF(290)~(295)EGF_CA(329)~(339)EGF(367)~(398)hEGF(409)~(412)EGF_CA(445)~(456)EGF(485)~(494)EGF(522)~(532)EGF(561)~(570)EGF(598)~(607)EGF(637)~(645)EGF(673)~(682)EGF(711)~(720)EGF(748)~(757)EGF(787)~(795)EGF(824)~(833)EGF(864)~(869)EGF_CA(902)~(911)EGF(939)~(949)EGF(979)~(987)EGF(1017)~(1025)EGF(1055)~(1063)EGF(1092)~(1447)Notch(1480)~(1487)Notch(1522)~(1527)Notch(1561)~(1566)NOD(1621)~(1671)NODP(1729)~(1920)Ank_5(1965)~(2001)Ank_2(2090)~(2480)DUF3454(2539) |

|        |                                                                                                                                                                                                                                                                                                                                                                                     |
|--------|-------------------------------------------------------------------------------------------------------------------------------------------------------------------------------------------------------------------------------------------------------------------------------------------------------------------------------------------------------------------------------------|
| Q96CM3 | (105)PseudoU_synth_2(276)                                                                                                                                                                                                                                                                                                                                                           |
| Q09428 | (304)ABC_membrane(590)~(696)ABC_tran(856)~(1014)ABC_membrane(1292)~(1361)ABC_tran(1509)                                                                                                                                                                                                                                                                                             |
| P84103 | (12)RRM_1(77)                                                                                                                                                                                                                                                                                                                                                                       |
| O95872 | (256)G-patch(299)                                                                                                                                                                                                                                                                                                                                                                   |
| P43250 | (53)RGS(170)~(187)Pkinase(448)                                                                                                                                                                                                                                                                                                                                                      |
| Q7RTY3 | (3)Trypsin(229)                                                                                                                                                                                                                                                                                                                                                                     |
| Q9BQC6 | (13)MRP-63(101)                                                                                                                                                                                                                                                                                                                                                                     |
| P17041 | (77)zf-C2H2(99)~(91)zf-H2C2_2(114)~(119)zf-H2C2_2(143)~(161)zf-C2H2(183)~(175)zf-H2C2_2(199)~(204)zf-H2C2_2(228)~(237)zf-H2C2_2(256)                                                                                                                                                                                                                                                |
| Q9BUQ8 | (415)DEAD(616)~(650)Helicase_C(759)                                                                                                                                                                                                                                                                                                                                                 |
| Q96MT7 | (364)WD40(393)~(567)WD40(602)~(851)WD40(886)                                                                                                                                                                                                                                                                                                                                        |
| Q6PHR2 | (17)Pkinase(270)~(282)MIT(345)~(377)MIT(442)                                                                                                                                                                                                                                                                                                                                        |
| Q659C4 | (219)La(274)                                                                                                                                                                                                                                                                                                                                                                        |
| Q96AX9 | (70)MIB_HERC2(135)~(218)MIB_HERC2(282)~(509)Ank_2(584)~(575)Ank_5(627)~(626)Ank_2(723)~(716)Ank_5(766)~(888)zf-C3HC4_3(929)~(968)zf-C3HC4_3(1007)                                                                                                                                                                                                                                   |
| Q8N3J2 | (281)MT-A70(455)                                                                                                                                                                                                                                                                                                                                                                    |
| P78316 | (26)Nop14(846)                                                                                                                                                                                                                                                                                                                                                                      |
| Q00532 | (4)Pkinase(287)                                                                                                                                                                                                                                                                                                                                                                     |
| Q13610 | (250)WD40(285)~(376)WD40(414)                                                                                                                                                                                                                                                                                                                                                       |
| A6NDX5 | (42)KRAB(82)~(151)zf-C2H2(173)~(225)zf-H2C2_2(244)~(263)zf-H2C2_2(287)~(305)zf-C2H2(327)~(323)zf-H2C2_2(344)~(347)zf-H2C2_2(371)~(375)zf-H2C2_2(399)~(403)zf-H2C2_2(428)~(417)zf-C2H2(439)~(460)zf-H2C2_2(484)~(487)zf-H2C2_2(511)~(535)zf-H2C2_2(559)~(563)zf-H2C2_2(587)~(591)zf-H2C2_2(616)~(605)zf-C2H2(627)~(648)zf-H2C2_2(672)~(675)zf-H2C2_2(699)                            |
| Q9NY57 | (23)Pkinase(282)                                                                                                                                                                                                                                                                                                                                                                    |
| P51003 | (21)PAP_central(363)~(366)PAP_RNA-bind(432)                                                                                                                                                                                                                                                                                                                                         |
| P56182 | (12)Nop52(219)                                                                                                                                                                                                                                                                                                                                                                      |
| Q86UK0 | (932)ABC2_membrane_3(1270)~(1361)ABC_tran(1506)~(1744)ABC2_membrane_3(2166)~(2273)ABC_tran(2417)                                                                                                                                                                                                                                                                                    |
| P51114 | (5)Agenet(53)~(62)Agenet(118)~(221)KH_1(276)~(286)KH_1(349)~(354)FXMRP1_C_core(379)~(379)FXMRP1_C_core(456)~(460)FXR_C1(534)~(554)FXR_C3(620)                                                                                                                                                                                                                                       |
| O43567 | (77)PA(159)~(239)zf-RING_2(282)                                                                                                                                                                                                                                                                                                                                                     |
| P31943 | (13)RRM_6(84)~(114)RRM_1(181)~(255)zf-RNPHF(290)~(291)RRM_6(358)                                                                                                                                                                                                                                                                                                                    |
| Q13901 | (19)Sas10_Utp3(96)                                                                                                                                                                                                                                                                                                                                                                  |
| Q9BRL6 | (17)RRM_1(86)                                                                                                                                                                                                                                                                                                                                                                       |
| Q8IZ69 | (401)tRNA_U5-meth_tr(588)                                                                                                                                                                                                                                                                                                                                                           |
| Q8N8Z8 | (4)KRAB(44)~(182)zf-H2C2_2(205)~(212)zf-H2C2_2(233)~(241)zf-H2C2_2(262)~(272)zf-H2C2_2(291)~(295)zf-H2C2_2(318)~(323)zf-H2C2_2(346)~(351)zf-H2C2_2(374)~(380)zf-H2C2_2(401)~(406)zf-H2C2_2(428)~(434)zf-H2C2_2(457)~(463)zf-H2C2_2(483)~(490)zf-H2C2_2(513)~(518)zf-H2C2_2(541)~(549)zf-H2C2_2(567)~(574)zf-H2C2_2(597)~(602)zf-H2C2_2(626)~(630)zf-H2C2_2(652)~(660)zf-H2C2_2(681) |
| P55735 | (12)WD40(41)~(50)WD40(86)~(97)WD40(130)~(205)WD40(243)~(259)WD40(290)                                                                                                                                                                                                                                                                                                               |
| Q8IUH5 | (64)Ank_2(152)~(161)Ank_2(255)~(438)zf-DHHC(568)                                                                                                                                                                                                                                                                                                                                    |
| Q15061 | (123)WD40(154)~(165)WD40(193)~(474)Utp12(575)                                                                                                                                                                                                                                                                                                                                       |
| O15021 | (258)DUF1908(534)~(573)Pkinase(846)                                                                                                                                                                                                                                                                                                                                                 |
| P62841 | (47)Ribosomal_S19(128)                                                                                                                                                                                                                                                                                                                                                              |
| P01861 | (14)C1-set(93)~(127)C1-set(212)~(233)C1-set(315)                                                                                                                                                                                                                                                                                                                                    |
| Q14191 | (60)DNA_pol_A_exo1(228)~(551)DEAD(710)~(759)Helicase_C(859)~(871)RecQ_Zn_bind(940)~(955)RQC(1053)~(1156)HRDC(1212)~(1258)HTH_40(1351)                                                                                                                                                                                                                                               |

|        |                                                                                                                                                                                                                                                                                                                   |
|--------|-------------------------------------------------------------------------------------------------------------------------------------------------------------------------------------------------------------------------------------------------------------------------------------------------------------------|
| P21399 | (58)Aconitase(564)~(693)Aconitase_C(818)                                                                                                                                                                                                                                                                          |
| Q9Y3B7 | (20)Ribosomal_L11_N(78)~(84)Ribosomal_L11(155)                                                                                                                                                                                                                                                                    |
| Q8IZL9 | (7)Pkinase(288)                                                                                                                                                                                                                                                                                                   |
| P62314 | (5)LSM(69)                                                                                                                                                                                                                                                                                                        |
| Q8IVC4 | (17)KRAB(57)~(159)zf-C2H2(181)~(174)zf-H2C2_2(197)~(214)zf-C2H2(236)~(229)zf-H2C2_2(252)~(256)zf-H2C2_2(280)~(285)zf-H2C2_2(309)~(316)zf-H2C2_2(337)~(341)zf-H2C2_2(365)~(370)zf-H2C2_2(393)                                                                                                                      |
| Q9UKT8 | (142)WD40(174)~(219)WD40(253)~(258)WD40(304)                                                                                                                                                                                                                                                                      |
| Q96J65 | (128)ABC_membrane(387)~(496)ABC_tran(630)~(798)ABC_membrane(1012)~(1137)ABC_tran(1285)                                                                                                                                                                                                                            |
| O60930 | (28)Cauli_VI(70)~(140)RNase_H(281)                                                                                                                                                                                                                                                                                |
| Q5VZF2 | (17)zf-CCCH(40)~(59)zf-CCCH(72)~(178)zf-CCCH(202)                                                                                                                                                                                                                                                                 |
| Q9HAZ2 | (295)zf-H2C2_2(318)~(337)zf-C2H2(360)~(351)zf-H2C2_2(377)~(394)zf-C2H2(416)~(424)zf-C2H2(443)~(965)zf-H2C2_2(989)~(979)zf-C2H2(1002)~(993)zf-H2C2_2(1018)                                                                                                                                                         |
| Q9NSD4 | (116)zf-H2C2_2(138)~(181)zf-C2H2(203)~(196)zf-H2C2_2(219)~(223)zf-H2C2_2(246)~(252)zf-H2C2_2(274)~(280)zf-H2C2_2(303)~(308)zf-H2C2_2(331)~(335)zf-H2C2_2(358)~(364)zf-H2C2_2(387)~(377)zf-C2H2(399)~(392)zf-H2C2_2(416)                                                                                           |
| O94933 | (105)LRR_8(161)~(456)LRR_8(516)                                                                                                                                                                                                                                                                                   |
| P00747 | (25)PAN_1(96)~(103)Kringle(181)~(185)Kringle(262)~(275)Kringle(352)~(377)Kringle(454)~(481)Kringle(560)~(582)Trypsin(803)                                                                                                                                                                                         |
| Q96AZ6 | (8)RNase_T(162)                                                                                                                                                                                                                                                                                                   |
| Q7Z6G8 | (7)Ank_2(117)~(95)Ank_4(148)~(167)Ank_2(256)~(811)SAM_1(873)~(884)SAM_1(943)~(1063)PID(1191)                                                                                                                                                                                                                      |
| Q9UQ03 | (12)DUF1899(74)~(85)WD40(115)~(131)WD40(166)~(170)WD40(206)~(350)WD40_4(392)                                                                                                                                                                                                                                      |
| P25963 | (135)Ank_2(212)~(183)Ank_4(237)                                                                                                                                                                                                                                                                                   |
| P21439 | (58)ABC_membrane(345)~(412)ABC_tran(561)~(712)ABC_membrane(985)~(1052)ABC_tran(1210)                                                                                                                                                                                                                              |
| Q7RTY7 | (52)Trypsin(268)~(333)CUB(406)~(419)CUB(528)~(575)Trypsin(807)~(846)CUB(943)~(982)CUB(1058)                                                                                                                                                                                                                       |
| Q99684 | (270)zf-H2C2_2(295)~(312)zf-C2H2(334)~(355)zf-H2C2_2(378)~(368)zf-C2H2(390)~(382)zf-H2C2_2(405)                                                                                                                                                                                                                   |
| A6NHY2 | (73)Ank_2(164)~(120)Ank_5(174)~(191)Ank_4(221)~(235)Ank_4(288)~(272)Ank_2(364)                                                                                                                                                                                                                                    |
| Q9BWG6 | (44)zf-SCNM1(69)~(183)SCNM1_acidic(228)                                                                                                                                                                                                                                                                           |
| Q9UH17 | (18)APOBEC_N(187)~(198)APOBEC_N(374)                                                                                                                                                                                                                                                                              |
| P0DKX0 | (4)KRAB(44)~(220)zf-H2C2_2(238)~(243)zf-H2C2_2(267)~(256)zf-C2H2(278)~(271)zf-H2C2_2(294)~(312)zf-C2H2(334)~(326)zf-H2C2_2(351)~(355)zf-H2C2_2(378)~(382)zf-H2C2_2(406)~(411)zf-H2C2_2(435)~(438)zf-H2C2_2(462)~(466)zf-H2C2_2(490)~(494)zf-H2C2_2(518)~(522)zf-H2C2_2(545)~(551)zf-H2C2_2(574)~(592)zf-C2H2(614) |
| A6NK59 | (87)Ank_2(180)~(188)Ank_2(277)~(253)Ank_2(341)~(286)Ank_2(383)~(342)Ank_2(414)~(531)SOCS_box(572)                                                                                                                                                                                                                 |
| Q8NCE0 | (41)tRNA_int_endo_N(68)~(280)tRNA_int_endo_N(329)~(339)tRNA_int_endo(423)                                                                                                                                                                                                                                         |
| Q04637 | (762)MIF4G(987)~(1242)MA3(1353)~(1521)W2(1597)                                                                                                                                                                                                                                                                    |
| Q9Y462 | (65)Zfx_Zfy_act(308)~(320)Zfx_Zfy_act(368)~(383)zf-C2H2(405)~(398)zf-H2C2_2(423)~(491)zf-H2C2_2(516)~(505)zf-C2H2(527)~(520)zf-H2C2_2(539)~(533)zf-H2C2_5(557)~(547)zf-H2C2_2(571)~(604)zf-H2C2_2(629)~(619)zf-C2H2(641)~(634)zf-H2C2_2(656)~(677)zf-C2H2(698)~(691)zf-H2C2_2(713)~(719)zf-H2C2_2(743)            |
| P63121 | (7)RVP(105)~(112)G-patch(154)                                                                                                                                                                                                                                                                                     |
| P49910 | (45)SCAN(132)~(344)zf-C2H2(366)~(359)zf-H2C2_2(382)~(372)zf-C2H2(394)~(386)zf-H2C2_2(409)~(414)zf-H2C2_2(437)~(442)zf-H2C2_2(466)                                                                                                                                                                                 |
| Q9H074 | (160)MIF4G(376)                                                                                                                                                                                                                                                                                                   |
| Q9Y5S9 | (75)RRM_1(144)                                                                                                                                                                                                                                                                                                    |

|        |                                                                                                                                                                                                                                                                                                                                              |
|--------|----------------------------------------------------------------------------------------------------------------------------------------------------------------------------------------------------------------------------------------------------------------------------------------------------------------------------------------------|
| Q50LG9 | (76)LRR_8(134)~(146)LRR_8(204)~(261)I-set(360)                                                                                                                                                                                                                                                                                               |
| Q6RI45 | (177)WD40(207)~(213)WD40(249)~(256)WD40(295)~(355)WD40(391)~(455)WD40(494)~(1154)Bromodomain(1232)~(1359)Bromodomain(1414)                                                                                                                                                                                                                   |
| Q14678 | (30)KN_motif(68)~(1147)Ank_2(1228)~(1238)Ank_2(1323)                                                                                                                                                                                                                                                                                         |
| P00739 | (104)Trypsin(341)                                                                                                                                                                                                                                                                                                                            |
| Q13398 | (33)KRAB(73)~(138)zf-C2H2(157)~(271)zf-H2C2_2(296)~(303)zf-H2C2_2(323)~(327)zf-H2C2_2(351)~(355)zf-H2C2_2(379)~(384)zf-H2C2_2(408)~(415)zf-H2C2_2(436)~(453)zf-C2H2(475)~(467)zf-H2C2_2(491)~(495)zf-H2C2_2(519)~(524)zf-H2C2_2(547)                                                                                                         |
| Q9BXA7 | (17)Pkinase(272)                                                                                                                                                                                                                                                                                                                             |
| Q6UB98 | (178)Ank_2(246)~(237)Ank_5(291)                                                                                                                                                                                                                                                                                                              |
| Q9P244 | (66)LRR_8(125)~(163)LRR_8(222)~(309)I-set(387)                                                                                                                                                                                                                                                                                               |
| P33240 | (18)RRM_1(88)~(113)CSTF2_hinge(191)~(533)CSTF_C(573)                                                                                                                                                                                                                                                                                         |
| O15371 | (4)eIF-3_zeta(521)                                                                                                                                                                                                                                                                                                                           |
| Q71RC2 | (123)La(178)                                                                                                                                                                                                                                                                                                                                 |
| Q05516 | (25)BTB(124)~(420)zf-H2C2_2(441)~(460)zf-C2H2_6(483)~(492)zf-C2H2(512)~(518)zf-C2H2_6(540)~(561)zf-H2C2_2(584)~(589)zf-H2C2_2(610)~(619)zf-H2C2_2(638)                                                                                                                                                                                       |
| Q96EK9 | (1)KTI12(350)                                                                                                                                                                                                                                                                                                                                |
| Q8IXA5 | (89)Lys(213)                                                                                                                                                                                                                                                                                                                                 |
| Q6PF06 | (135)tRNA_m1G_MT(305)                                                                                                                                                                                                                                                                                                                        |
| Q9NS39 | (134)dsrm(187)~(285)dsrm(339)~(408)A_deamin(729)                                                                                                                                                                                                                                                                                             |
| P51955 | (8)Pkinase(270)                                                                                                                                                                                                                                                                                                                              |
| Q8NHU6 | (7)OST-HTH(70)~(235)OST-HTH(269)~(460)TUDOR(581)~(650)TUDOR(774)~(909)TUDOR(1026)                                                                                                                                                                                                                                                            |
| Q5XUX1 | (170)WD40(201)~(223)WD40(252)~(409)WD40(443)                                                                                                                                                                                                                                                                                                 |
| Q9Y6I7 | (161)WD40(199)~(206)WD40(242)~(249)WD40(284)~(308)WD40(338)~(355)Ge1_WD40(379)~(384)SOCS_box(419)                                                                                                                                                                                                                                            |
| P01617 | (6)V-set(111)                                                                                                                                                                                                                                                                                                                                |
| Q8WTR7 | (209)zf-C2H2(231)~(320)zf-C2H2(342)~(334)zf-H2C2_2(356)~(376)zf-C2H2(397)~(418)zf-H2C2_2(441)~(459)zf-C2H2(481)~(473)zf-H2C2_2(497)~(502)zf-H2C2_2(524)~(577)zf-H2C2_2(601)~(646)zf-C2H2(668)~(660)zf-H2C2_2(684)~(703)zf-C2H2(724)~(717)zf-H2C2_2(739)~(745)zf-H2C2_2(769)~(773)zf-H2C2_2(796)~(800)zf-H2C2_2(824)~(828)zf-H2C2_2(851)      |
| Q6ECI4 | (23)KRAB(63)~(243)zf-H2C2_2(266)~(270)zf-H2C2_2(294)~(298)zf-H2C2_2(322)~(326)zf-H2C2_2(350)~(355)zf-H2C2_2(378)~(383)zf-H2C2_2(407)~(412)zf-H2C2_2(436)~(439)zf-H2C2_2(464)~(467)zf-H2C2_2(491)~(496)zf-H2C2_2(519)~(523)zf-H2C2_2(547)~(551)zf-H2C2_2(575)~(580)zf-H2C2_2(603)~(609)zf-H2C2_2(632)~(635)zf-H2C2_2(659)~(663)zf-H2C2_2(687) |
| Q9BXT4 | (170)zf-MYND(206)~(261)TUDOR(382)~(492)TUDOR(611)~(712)TUDOR(831)~(937)TUDOR(1059)                                                                                                                                                                                                                                                           |
| Q9BZB8 | (1)CEBP1_N(307)~(310)RRM_7(410)~(502)CEBP_ZZ(559)                                                                                                                                                                                                                                                                                            |
| A8MWD9 | (8)LSM(71)                                                                                                                                                                                                                                                                                                                                   |
| Q16513 | (51)HR1(108)~(137)HR1(198)~(218)HR1(280)~(662)Pkinase(916)                                                                                                                                                                                                                                                                                   |
| Q8IWX8 | (13)Surp(60)~(211)CTD_bind(273)~(842)G-patch(888)                                                                                                                                                                                                                                                                                            |
| O14979 | (151)RRM_1(218)~(235)RRM_1(294)                                                                                                                                                                                                                                                                                                              |
| P19338 | (309)RRM_1(377)~(398)RRM_1(459)~(488)RRM_1(554)~(574)RRM_1(640)                                                                                                                                                                                                                                                                              |
| P63132 | (76)RVT_1(245)~(252)RVT_thumb(316)~(462)RNase_H(588)~(592)Integrase_Zn(629)~(646)rive(755)                                                                                                                                                                                                                                                   |
| P52272 | (41)HnRNP_M(70)~(74)RRM_1(143)~(206)RRM_1(274)~(655)RRM_1(722)                                                                                                                                                                                                                                                                               |
| Q9Y2P7 | (14)KRAB(54)~(239)zf-C2H2(261)~(253)zf-H2C2_2(276)~(282)zf-H2C2_2(305)~(310)zf-H2C2_2(334)~(338)zf-H2C2_2(361)~(366)zf-H2C2_2(389)~(393)zf-H2C2_2(418)~(435)zf-C2H2(457)~(450)zf-H2C2_2(473)~(491)zf-C2H2(513)~(506)zf-H2C2_2(529)~(534)zf-                                                                                                  |



|        |                                                                                                                                                                                                                                                                                                                                                                                                                                              |
|--------|----------------------------------------------------------------------------------------------------------------------------------------------------------------------------------------------------------------------------------------------------------------------------------------------------------------------------------------------------------------------------------------------------------------------------------------------|
|        | H2C2_2(558)~(561)zf-H2C2_2(585)~(589)zf-H2C2_2(613)                                                                                                                                                                                                                                                                                                                                                                                          |
| P06889 | (4)V-set(105)                                                                                                                                                                                                                                                                                                                                                                                                                                |
| Q8TF32 | (35)KRAB(75)~(192)zf-H2C2_2(213)~(218)zf-H2C2_2(242)~(247)zf-H2C2_2(271)~(275)zf-H2C2_2(298)~(302)zf-H2C2_2(326)~(331)zf-H2C2_2(354)~(359)zf-H2C2_2(381)~(387)zf-H2C2_2(410)~(414)zf-H2C2_2(438)~(443)zf-H2C2_2(466)~(471)zf-H2C2_2(494)~(498)zf-H2C2_2(522)~(527)zf-H2C2_2(550)                                                                                                                                                             |
| O75616 | (115)MMR_HSR1(237)                                                                                                                                                                                                                                                                                                                                                                                                                           |
| Q86VZ2 | (35)WD40(68)~(76)WD40(111)~(115)WD40(152)~(139)eIF2A(246)~(289)WD40(326)                                                                                                                                                                                                                                                                                                                                                                     |
| Q6ZSA7 | (103)LRR_8(161)~(177)LRR_4(209)                                                                                                                                                                                                                                                                                                                                                                                                              |
| Q8TF46 | (465)RNB(816)                                                                                                                                                                                                                                                                                                                                                                                                                                |
| Q9NRR4 | (962)Ribonucleas_3_3(1070)~(1144)Ribonuclease_3(1232)~(1261)dsrm(1331)                                                                                                                                                                                                                                                                                                                                                                       |
| Q86UD4 | (203)zf-C2H2(225)~(218)zf-H2C2_2(241)~(245)zf-H2C2_2(269)~(273)zf-H2C2_2(297)~(304)zf-H2C2_2(325)~(329)zf-H2C2_2(352)~(358)zf-H2C2_2(381)~(386)zf-H2C2_2(408)~(399)zf-C2H2(421)~(442)zf-H2C2_2(464)~(470)zf-H2C2_2(494)~(483)zf-C2H2(505)~(512)zf-C2H2(533)                                                                                                                                                                                  |
| Q5SY16 | (306)CLP1_P(439)                                                                                                                                                                                                                                                                                                                                                                                                                             |
| P04220 | (66)C1-set(143)~(176)C1-set(252)~(276)C1-set(361)                                                                                                                                                                                                                                                                                                                                                                                            |
| Q86XD8 | (34)ubiquitin(100)                                                                                                                                                                                                                                                                                                                                                                                                                           |
| Q86UQ4 | (3549)ABC2_membrane_3(3770)~(3859)ABC_tran(4004)~(4390)ABC2_membrane_3(4661)~(4738)ABC_tran(4884)                                                                                                                                                                                                                                                                                                                                            |
| Q6ZMW2 | (8)KRAB(48)~(354)zf-H2C2_2(375)~(379)zf-H2C2_2(404)~(409)zf-H2C2_2(432)~(437)zf-H2C2_2(461)~(467)zf-H2C2_2(489)~(492)zf-H2C2_2(516)~(520)zf-H2C2_2(544)~(549)zf-H2C2_2(572)~(576)zf-H2C2_2(600)~(604)zf-H2C2_2(628)~(633)zf-H2C2_2(656)~(660)zf-H2C2_2(684)                                                                                                                                                                                  |
| P06311 | (26)V-set(126)                                                                                                                                                                                                                                                                                                                                                                                                                               |
| P15814 | (121)C1-set(202)                                                                                                                                                                                                                                                                                                                                                                                                                             |
| P49207 | (1)Ribosomal_L34e(96)                                                                                                                                                                                                                                                                                                                                                                                                                        |
| Q9Y2C9 | (77)LRR_8(133)~(378)LRR_4(415)~(450)LRR_8(506)~(644)TIR(789)                                                                                                                                                                                                                                                                                                                                                                                 |
| Q8TDX7 | (35)Pkinase(286)                                                                                                                                                                                                                                                                                                                                                                                                                             |
| Q9P2J8 | (54)KRAB(94)~(276)zf-C2H2(298)~(293)zf-H2C2_2(314)~(319)zf-H2C2_2(341)~(346)zf-H2C2_2(370)~(375)zf-H2C2_2(398)~(403)zf-H2C2_2(427)~(431)zf-H2C2_2(455)~(460)zf-H2C2_2(482)~(487)zf-H2C2_2(510)~(514)zf-H2C2_2(538)~(543)zf-H2C2_2(565)~(556)zf-C2H2(578)~(598)zf-H2C2_2(622)~(626)zf-H2C2_2(651)~(657)zf-H2C2_2(679)~(683)zf-H2C2_2(707)~(711)zf-H2C2_2(734)~(740)zf-H2C2_2(762)~(767)zf-H2C2_2(788)~(795)zf-H2C2_2(819)~(823)zf-H2C2_2(846) |
| P45985 | (104)Pkinase(367)                                                                                                                                                                                                                                                                                                                                                                                                                            |
| Q8TE96 | (442)HA2(528)                                                                                                                                                                                                                                                                                                                                                                                                                                |
| O75821 | (61)eIF3g(175)~(241)RRM_1(304)                                                                                                                                                                                                                                                                                                                                                                                                               |
| P05156 | (118)SRCR(214)~(226)Ldl_recept_a(256)~(258)Ldl_recept_a(293)~(340)Trypsin(569)                                                                                                                                                                                                                                                                                                                                                               |
| Q92733 | (275)PRCC(491)                                                                                                                                                                                                                                                                                                                                                                                                                               |
| Q9UJL9 | (74)KRAB(114)~(279)zf-C2H2(301)~(293)zf-H2C2_2(317)~(325)zf-H2C2_2(346)~(349)zf-H2C2_2(373)~(378)zf-H2C2_2(400)~(405)zf-H2C2_2(430)~(434)zf-H2C2_2(457)~(461)zf-H2C2_2(486)~(490)zf-H2C2_2(513)                                                                                                                                                                                                                                              |
| Q9Y4C1 | (1155)JmjC(1264)                                                                                                                                                                                                                                                                                                                                                                                                                             |
| Q8NAT2 | (8)OST-HTH(74)~(134)OST-HTH(195)~(297)OST-HTH(362)~(472)TUDOR(594)                                                                                                                                                                                                                                                                                                                                                                           |
| Q8TEA8 | (2)Tyr_Deacylase(146)                                                                                                                                                                                                                                                                                                                                                                                                                        |
| Q9Y6E0 | (36)Pkinase(286)                                                                                                                                                                                                                                                                                                                                                                                                                             |
| A6NJS3 | (27)V-set(116)                                                                                                                                                                                                                                                                                                                                                                                                                               |
| Q9NW13 | (6)RRM_1(65)~(116)RRM_1(184)~(337)RRM_1(394)~(489)RRM_6(558)                                                                                                                                                                                                                                                                                                                                                                                 |
| Q12874 | (74)SF3a60_bindingd(100)~(129)SF3A3(206)~(244)Telomere_Sde2_2(303)~(324)DUF3449(500)                                                                                                                                                                                                                                                                                                                                                         |

|         |                                                                                                                                                                                                                                                                                                                                                                         |
|---------|-------------------------------------------------------------------------------------------------------------------------------------------------------------------------------------------------------------------------------------------------------------------------------------------------------------------------------------------------------------------------|
| Q9H2R5  | (24)Trypsin(249)                                                                                                                                                                                                                                                                                                                                                        |
| Q9Y4C8  | (4)RRM_1(72)~(302)RRM_1(362)~(404)RRM_1(473)~(589)RRM_1(648)~(732)RRM_1(804)~(834)RRM_1(905)                                                                                                                                                                                                                                                                            |
| Q15366  | (15)KH_1(75)~(99)KH_1(162)~(291)KH_1(351)                                                                                                                                                                                                                                                                                                                               |
| O14936  | (12)Pkinase(276)~(347)L27(394)~(406)L27(456)~(491)PDZ(567)~(616)SH3_2(680)~(738)Guanylate_kin(911)                                                                                                                                                                                                                                                                      |
| Q96QH8  | (22)Lys(147)                                                                                                                                                                                                                                                                                                                                                            |
| A1KZ92  | (52)LRR_8(110)~(123)LRR_8(182)~(234)I-set(317)~(330)I-set(415)~(419)I-set(505)~(512)I-set(597)~(727)An_peroxidase(1272)                                                                                                                                                                                                                                                 |
| Q6UXN9  | (16)WD40(49)~(99)WD40(135)~(229)WD40(267)                                                                                                                                                                                                                                                                                                                               |
| P38919  | (63)DEAD(225)~(263)Helicase_C(372)                                                                                                                                                                                                                                                                                                                                      |
| Q7Z3V5  | (6)KRAB(46)~(139)zf-C2H2_4(161)~(184)zf-H2C2_2(205)~(210)zf-H2C2_2(232)~(238)zf-H2C2_2(262)~(267)zf-H2C2_2(288)~(294)zf-H2C2_2(316)~(321)zf-H2C2_2(345)~(350)zf-H2C2_2(372)~(378)zf-H2C2_2(400)~(405)zf-H2C2_2(428)~(434)zf-H2C2_2(456)~(474)zf-C2H2(496)~(489)zf-H2C2_2(511)~(517)zf-H2C2_2(539)~(544)zf-H2C2_2(569)~(573)zf-H2C2_2(595)                               |
| Q01484  | (37)Ank_2(126)~(97)Ank_4(150)~(237)Ank_2(328)~(270)Ank_2(360)~(365)Ank_4(418)~(431)Ank_4(484)~(468)Ank_2(555)~(562)Ank_2(624)~(628)Ank_2(690)~(732)Ank_2(813)~(968)ZU5(1043)~(1049)ZU5(1099)~(1162)ZU5(1238)~(3571)Death(3650)                                                                                                                                          |
| Q7Z5A4  | (80)Trypsin(292)                                                                                                                                                                                                                                                                                                                                                        |
| Q9NYY8  | (458)FAST_1(527)~(638)RAP(691)                                                                                                                                                                                                                                                                                                                                          |
| Q9H1D9  | (13)RNA_pol_Rpc34(315)                                                                                                                                                                                                                                                                                                                                                  |
| Q5J TZ9 | (42)tRNA-synt_2c(623)                                                                                                                                                                                                                                                                                                                                                   |
| Q9NZP8  | (47)CUB(148)~(247)Trypsin(479)                                                                                                                                                                                                                                                                                                                                          |
| Q8TBY0  | (63)RRM_1(126)~(143)RRM_1(204)~(238)RRM_1(301)~(393)DND1_DSRM(468)                                                                                                                                                                                                                                                                                                      |
| Q9P2F9  | (132)zf-C2H2(154)~(217)zf-H2C2_2(240)~(230)zf-C2H2(252)~(244)zf-H2C2_2(269)~(315)zf-C2H2(337)~(329)zf-H2C2_2(353)~(357)zf-H2C2_2(381)~(385)zf-H2C2_2(409)~(428)zf-C2H2(450)~(459)zf-C2H2_jaz(476)~(487)zf-C2H2(508)~(500)zf-H2C2_2(525)~(514)zf-C2H2(536)                                                                                                               |
| Q9NYW8  | (8)KRAB(48)~(261)zf-C2H2(283)~(279)zf-H2C2_2(299)~(289)zf-C2H2(311)~(331)zf-H2C2_2(354)~(359)zf-H2C2_2(384)~(373)zf-C2H2(395)~(418)zf-H2C2_2(440)~(444)zf-H2C2_2(466)~(474)zf-H2C2_2(492)~(498)zf-H2C2_2(520)~(539)zf-C2H2(561)~(554)zf-H2C2_2(578)~(569)zf-C2H2(589)~(582)zf-H2C2_2(605)~(610)zf-H2C2_2(634)~(637)zf-H2C2_2(661)~(651)zf-C2H2(673)~(666)zf-H2C2_2(690) |
| Q16584  | (48)SH3_9(100)~(117)Pkinase_Tyr(376)                                                                                                                                                                                                                                                                                                                                    |
| Q8IU80  | (86)SEA(159)~(459)Ldl_recept_a(489)~(491)Ldl_recept_a(525)~(530)Ldl_recept_a(566)~(577)Trypsin(806)                                                                                                                                                                                                                                                                     |
| P63244  | (9)WD40(44)~(55)WD40(91)~(96)WD40(133)~(145)WD40(178)~(188)WD40(220)~(225)WD40(260)                                                                                                                                                                                                                                                                                     |
| Q9H2U1  | (212)DEAD(372)~(485)Helicase_C(606)~(671)HA2(758)~(808)OB_NTP_bind(917)                                                                                                                                                                                                                                                                                                 |
| Q969H6  | (7)RNase_P_Rpp14(115)                                                                                                                                                                                                                                                                                                                                                   |
| P68104  | (5)GTP_EFTU(237)~(260)GTP_EFTU_D2(325)~(336)GTP_EFTU_D3(441)                                                                                                                                                                                                                                                                                                            |
| Q9P015  | (45)Ribosomal_L18e(176)                                                                                                                                                                                                                                                                                                                                                 |
| O43293  | (13)Pkinase(275)                                                                                                                                                                                                                                                                                                                                                        |
| P22694  | (44)Pkinase(298)                                                                                                                                                                                                                                                                                                                                                        |
| Q96G46  | (309)Dus(555)                                                                                                                                                                                                                                                                                                                                                           |
| Q96MU6  | (42)KRAB(81)~(295)zf-H2C2_2(319)~(324)zf-H2C2_2(346)~(352)zf-H2C2_2(376)~(380)zf-H2C2_2(403)~(408)zf-H2C2_2(430)~(436)zf-H2C2_2(459)~(463)zf-H2C2_2(487)~(492)zf-H2C2_2(515)~(520)zf-H2C2_2(544)~(548)zf-H2C2_2(571)~(575)zf-H2C2_2(600)~(604)zf-H2C2_2(627)~(632)zf-H2C2_2(654)~(662)zf-H2C2_2(683)~(701)zf-C2H2(723)                                                  |
| Q5VYS8  | (551)PAP_assoc(600)~(964)zf-CCHC(980)~(1233)PAP_assoc(1286)~(1346)zf-CCHC(1361)~(1363)TUTF7_u4(1450)~(1452)zf-CCHC(1468)                                                                                                                                                                                                                                                |

|        |                                                                                                                                                                                                                                                                                 |
|--------|---------------------------------------------------------------------------------------------------------------------------------------------------------------------------------------------------------------------------------------------------------------------------------|
| Q6PG37 | (6)KRAB(45)~(225)zf-C2H2_6(248)~(241)zf-H2C2_2(263)~(269)zf-H2C2_2(292)~(296)zf-H2C2_2(320)~(324)zf-H2C2_2(349)~(352)zf-H2C2_2(375)~(380)zf-H2C2_2(403)~(408)zf-H2C2_2(432)~(437)zf-H2C2_2(461)~(465)zf-H2C2_2(487)~(493)zf-H2C2_2(515)~(521)zf-H2C2_2(543)                     |
| Q8IW40 | (7)Dynein_attach_N(74)~(98)RPAP3_C(188)                                                                                                                                                                                                                                         |
| Q9UKV5 | (339)zf-RING_2(379)~(458)CUE(496)                                                                                                                                                                                                                                               |
| O75717 | (13)WD40(40)~(128)WD40(163)~(431)Mcl1_mid(714)                                                                                                                                                                                                                                  |
| Q8N587 | (41)KRAB(80)~(119)zf-C2H2(138)~(197)zf-C2H2(219)~(281)zf-C2H2(303)~(296)zf-H2C2_2(320)~(324)zf-H2C2_2(347)~(352)zf-H2C2_2(376)~(380)zf-H2C2_2(403)~(409)zf-H2C2_2(432)~(436)zf-H2C2_2(459)~(464)zf-H2C2_2(480)                                                                  |
| P25098 | (55)RGS(174)~(192)Pkinase(453)~(560)PH(650)                                                                                                                                                                                                                                     |
| P33527 | (326)ABC_membrane(596)~(661)ABC_tran(795)~(976)ABC_membrane(1242)~(1310)ABC_tran(1458)                                                                                                                                                                                          |
| Q8NA42 | (6)KRAB(46)~(170)zf-C2H2(192)~(213)zf-H2C2_2(236)~(241)zf-H2C2_2(265)~(269)zf-H2C2_2(292)~(299)zf-H2C2_2(321)~(325)zf-H2C2_2(349)~(352)zf-H2C2_2(377)~(381)zf-H2C2_2(405)~(411)zf-H2C2_2(432)~(436)zf-H2C2_2(461)                                                               |
| P52758 | (12)Ribonuc_L-PSP(128)                                                                                                                                                                                                                                                          |
| Q99459 | (11)Myb_DNA-bind_6(71)~(404)Myb_Cef(655)                                                                                                                                                                                                                                        |
| P26378 | (48)RRM_1(118)~(134)RRM_1(199)~(299)RRM_1(368)                                                                                                                                                                                                                                  |
| Q9H607 | (153)Occludin_ELL(253)                                                                                                                                                                                                                                                          |
| P62273 | (9)Ribosomal_S14(54)                                                                                                                                                                                                                                                            |
| Q9NZU1 | (56)LRR_4(93)~(99)LRR_8(161)~(171)LRR_8(232)~(243)LRR_8(301)                                                                                                                                                                                                                    |
| P63128 | (13)Gag_p10(93)~(312)Gag_p24(526)~(578)zf-CCHC_5(613)~(668)dUTPase(756)~(786)RVP(883)~(891)G-patch(933)~(999)RVT_1(1114)                                                                                                                                                        |
| P09012 | (12)RRM_1(82)~(210)RRM_1(272)                                                                                                                                                                                                                                                   |
| Q96PV6 | (530)SAC3_GANP(714)                                                                                                                                                                                                                                                             |
| P09001 | (115)Ribosomal_L3(340)                                                                                                                                                                                                                                                          |
| Q9BVS4 | (9)Rio2_N(91)~(108)RIO1(279)                                                                                                                                                                                                                                                    |
| O75373 | (5)KRAB(44)~(160)zf-H2C2_2(183)~(188)zf-H2C2_2(210)~(215)zf-H2C2_2(240)~(244)zf-H2C2_2(268)~(271)zf-H2C2_2(296)~(300)zf-H2C2_2(324)~(328)zf-H2C2_2(352)~(355)zf-H2C2_2(378)~(383)zf-H2C2_2(408)~(411)zf-H2C2_2(435)~(440)zf-H2C2_2(463)~(467)zf-H2C2_2(492)~(496)zf-H2C2_2(519) |
| O60573 | (55)IF4E(215)                                                                                                                                                                                                                                                                   |
| P62306 | (10)LSM(72)                                                                                                                                                                                                                                                                     |
| Q04724 | (1)TLE_N(133)~(608)WD40(644)                                                                                                                                                                                                                                                    |
| Q13106 | (14)KRAB(54)~(161)zf-C2H2(183)~(176)zf-H2C2_2(199)~(189)zf-C2H2(211)~(231)zf-H2C2_2(255)~(259)zf-H2C2_2(284)~(288)zf-H2C2_2(311)~(316)zf-H2C2_2(339)~(343)zf-H2C2_2(366)~(371)zf-H2C2_2(396)~(400)zf-H2C2_2(424)                                                                |
| Q9UKM9 | (23)RRM_1(85)                                                                                                                                                                                                                                                                   |
| P82914 | (107)Ribosomal_S15(187)                                                                                                                                                                                                                                                         |
| P35544 | (9)ubiquitin(70)                                                                                                                                                                                                                                                                |
| P52434 | (7)RNA_pol_Rpb8(147)                                                                                                                                                                                                                                                            |
| Q96FE5 | (76)LRR_4(106)~(120)LRR_8(179)~(160)LRR_5(278)~(312)LRR_8(371)~(429)I-set(514)                                                                                                                                                                                                  |
| O95260 | (21)ATE_N(92)~(290)ATE_C(431)                                                                                                                                                                                                                                                   |
| O75460 | (575)Pkinase(832)~(838)Ribonuc_2-5A(961)                                                                                                                                                                                                                                        |
| Q96H35 | (27)RRM_1(98)                                                                                                                                                                                                                                                                   |
| Q15646 | (168)OAS1_C(349)~(365)ubiquitin(390)~(439)ubiquitin(505)                                                                                                                                                                                                                        |
| P56537 | (4)eIF-6(204)                                                                                                                                                                                                                                                                   |
| Q9BUI4 | (7)HTH_9(66)~(146)RNA_pol_Rpc82(345)                                                                                                                                                                                                                                            |

|        |                                                                                                                                                                                                                                                                                                                                                                                                                                                  |
|--------|--------------------------------------------------------------------------------------------------------------------------------------------------------------------------------------------------------------------------------------------------------------------------------------------------------------------------------------------------------------------------------------------------------------------------------------------------|
| O60336 | (83)WD40(120)~(281)WD40(306)~(388)WD40(427)~(559)WD40(595)                                                                                                                                                                                                                                                                                                                                                                                       |
| O75962 | (221)Spectrin(337)~(341)Spectrin(444)~(570)Spectrin(670)~(675)Spectrin(783)~(909)Spectrin(1006)~(1140)Spectrin(1243)~(1296)RhoGEF(1465)~(1498)PH(1590)~(1662)SH3_1(1712)~(1715)SH3-RhoG_link(1972)~(1973)RhoGEF(2144)~(2181)PH(2270)~(2560)SH3_1(2585)~(2685)I-set(2776)~(2796)Pkinase(3050)                                                                                                                                                     |
| Q9Y3D3 | (25)Ribosomal_S16(84)                                                                                                                                                                                                                                                                                                                                                                                                                            |
| Q5VWX1 | (5)Qual(59)~(267)Sam68-YY(321)                                                                                                                                                                                                                                                                                                                                                                                                                   |
| Q9NVP1 | (203)DEAD(374)~(412)Helicase_C(519)~(561)DUF4217(619)                                                                                                                                                                                                                                                                                                                                                                                            |
| Q5TYW1 | (8)KRAB(48)~(399)zf-H2C2_2(421)~(440)zf-C2H2(462)~(504)zf-H2C2_2(528)~(532)zf-H2C2_2(557)~(560)zf-H2C2_2(585)~(588)zf-H2C2_2(613)~(616)zf-H2C2_2(641)~(645)zf-H2C2_2(669)~(672)zf-H2C2_2(697)~(700)zf-H2C2_2(725)~(728)zf-H2C2_2(751)~(757)zf-H2C2_2(780)~(785)zf-H2C2_2(809)~(813)zf-H2C2_2(836)~(844)zf-H2C2_2(864)~(868)zf-H2C2_2(892)~(896)zf-H2C2_2(920)~(926)zf-H2C2_2(949)~(953)zf-H2C2_2(976)~(980)zf-H2C2_2(1004)~(1009)zf-H2C2_2(1032) |
| P01824 | (7)V-set(127)                                                                                                                                                                                                                                                                                                                                                                                                                                    |
| Q9NP58 | (6)MTABC_N(255)~(274)ABC_membrane(544)~(606)ABC_tran(755)                                                                                                                                                                                                                                                                                                                                                                                        |
| Q92466 | (233)WD40(271)                                                                                                                                                                                                                                                                                                                                                                                                                                   |
| Q6P3R8 | (4)Pkinase(259)                                                                                                                                                                                                                                                                                                                                                                                                                                  |
| Q2TBE0 | (664)CwfJ_C_1(786)~(795)CwfJ_C_2(889)                                                                                                                                                                                                                                                                                                                                                                                                            |
| Q96J94 | (1)GAGE(107)~(280)PAZ(412)~(556)Piwi(847)                                                                                                                                                                                                                                                                                                                                                                                                        |
| Q9NRR2 | (38)Trypsin(265)                                                                                                                                                                                                                                                                                                                                                                                                                                 |
| P57059 | (27)Pkinase(278)                                                                                                                                                                                                                                                                                                                                                                                                                                 |
| Q86XU0 | (9)KRAB(48)~(263)zf-C2H2(285)~(277)zf-H2C2_2(301)~(305)zf-H2C2_2(329)~(333)zf-H2C2_2(356)~(361)zf-H2C2_2(385)~(389)zf-H2C2_2(414)~(417)zf-H2C2_2(440)~(445)zf-H2C2_2(468)~(473)zf-H2C2_2(497)~(501)zf-H2C2_2(526)                                                                                                                                                                                                                                |
| P01601 | (28)V-set(113)                                                                                                                                                                                                                                                                                                                                                                                                                                   |
| P42696 | (187)RRM_1(219)~(289)RRM_1(358)                                                                                                                                                                                                                                                                                                                                                                                                                  |
| P80421 | (7)V-set(118)                                                                                                                                                                                                                                                                                                                                                                                                                                    |
| P54136 | (79)Arg_tRNA_synt_N(166)~(174)tRNA-synt_1d(520)~(534)DALR_1(660)                                                                                                                                                                                                                                                                                                                                                                                 |
| Q8WWY3 | (100)Nop(330)~(338)Prp31_C(465)                                                                                                                                                                                                                                                                                                                                                                                                                  |
| Q9BR61 | (44)ACBP(121)~(168)Ank_2(255)                                                                                                                                                                                                                                                                                                                                                                                                                    |
| Q15149 | (7)S10_plectin(99)~(181)CH(277)~(296)CH(395)~(2866)Plectin(2905)~(2916)Plectin(2934)~(2941)Plectin(2982)~(3194)Plectin(3233)~(3244)Plectin(3265)~(3269)Plectin(3309)~(3525)Plectin(3564)~(3600)Plectin(3641)~(3860)Plectin(3899)~(3935)Plectin(3976)~(4103)Plectin(4142)~(4153)Plectin(4171)~(4178)Plectin(4218)~(4280)Plectin(4310)~(4331)Plectin(4353)~(4418)Plectin(4442)~(4447)Plectin(4484)                                                 |
| O60481 | (315)zf-H2C2_2(340)~(344)zf-H2C2_2(371)~(388)zf-C2H2(410)                                                                                                                                                                                                                                                                                                                                                                                        |
| P61513 | (3)Ribosomal_L37ae(88)                                                                                                                                                                                                                                                                                                                                                                                                                           |
| Q9Y3B2 | (64)EXOSC1(90)~(96)EXOSC1(135)                                                                                                                                                                                                                                                                                                                                                                                                                   |
| Q9NXL6 | (184)SID-1_RNA_chan(827)                                                                                                                                                                                                                                                                                                                                                                                                                         |
| Q9Y312 | (17)AAR2(363)                                                                                                                                                                                                                                                                                                                                                                                                                                    |
| Q09161 | (31)MIF4G(240)~(327)MIF4G_like(470)~(485)MIF4G_like_2(754)                                                                                                                                                                                                                                                                                                                                                                                       |
| Q9NUU7 | (116)DEAD(280)~(318)Helicase_C(433)                                                                                                                                                                                                                                                                                                                                                                                                              |
| Q13242 | (16)RRM_1(83)~(113)RRM_1(174)                                                                                                                                                                                                                                                                                                                                                                                                                    |
| Q902F8 | (19)HERV-K_REC(105)~(115)HERV-K_env_2(283)~(486)GP41(682)                                                                                                                                                                                                                                                                                                                                                                                        |
| O14709 | (39)SCAN(125)~(217)KRAB(256)~(385)zf-H2C2_2(407)~(413)zf-H2C2_2(436)~(441)zf-H2C2_2(464)~(471)zf-H2C2_2(492)~(482)zf-C2H2(504)~(527)zf-H2C2_2(548)~(566)zf-C2H2(588)~(612)zf-H2C2_2(633)~(640)zf-H2C2_2(659)~(667)zf-H2C2_2(688)~(693)zf-H2C2_2(715)~(721)zf-H2C2_2(745)~(749)zf-H2C2_2(773)~(776)zf-H2C2_2(799)~(818)zf-C2H2(840)~(832)zf-H2C2_2(857)~(860)zf-H2C2_2(882)~(888)zf-H2C2_2(912)~(916)zf-                                          |

|        |                                                                                                                                                                                                                                                                                                                                                                                                   |
|--------|---------------------------------------------------------------------------------------------------------------------------------------------------------------------------------------------------------------------------------------------------------------------------------------------------------------------------------------------------------------------------------------------------|
|        | H2C2_2(941)~(944)zf-H2C2_2(968)~(960)zf-C2H2(980)                                                                                                                                                                                                                                                                                                                                                 |
| P23246 | (299)RRM_1(363)~(374)RRM_1(433)~(444)NOPS(495)                                                                                                                                                                                                                                                                                                                                                    |
| Q8N8J6 | (8)KRAB(48)~(204)zf-C2H2(226)~(222)zf-H2C2_2(243)~(232)zf-C2H2(254)~(275)zf-H2C2_2(297)~(303)zf-H2C2_2(327)~(330)zf-H2C2_2(353)~(359)zf-H2C2_2(382)~(387)zf-H2C2_2(410)~(415)zf-H2C2_2(438)~(444)zf-H2C2_2(466)~(484)zf-C2H2(506)~(501)zf-H2C2_2(521)~(527)zf-H2C2_2(550)~(554)zf-H2C2_2(575)~(584)zf-H2C2_2(606)~(611)zf-H2C2_2(634)~(641)zf-H2C2_2(660)~(667)zf-H2C2_2(691)~(695)zf-H2C2_2(719) |
| Q8N3Y1 | (118)F-box-like(161)                                                                                                                                                                                                                                                                                                                                                                              |
| Q6UXK2 | (52)LRR_8(109)~(124)LRR_8(182)~(240)Ig_2(372)                                                                                                                                                                                                                                                                                                                                                     |
| Q14498 | (155)RRM_1(219)~(252)RRM_1(322)~(341)RBM39linker(442)~(451)RRM_5(505)                                                                                                                                                                                                                                                                                                                             |
| Q93033 | (29)V-set(142)~(154)V-set(255)~(291)ig(380)~(414)I-set(520)~(550)V-set(645)~(690)V-set(786)~(823)V-set(911)                                                                                                                                                                                                                                                                                       |
| P62316 | (37)LSM(109)                                                                                                                                                                                                                                                                                                                                                                                      |
| P23381 | (12)WHEP-TRS(64)~(152)tRNA-synt_1b(439)                                                                                                                                                                                                                                                                                                                                                           |
| Q7L0Y3 | (213)tRNA_m1G_MT(380)                                                                                                                                                                                                                                                                                                                                                                             |
| P01708 | (5)V-set(108)                                                                                                                                                                                                                                                                                                                                                                                     |
| Q9NUL3 | (11)dsrm(70)~(141)dsrm(179)~(210)dsrm(272)~(308)dsrm(373)~(457)Staufen_C(514)                                                                                                                                                                                                                                                                                                                     |
| Q6UXM1 | (78)LRR_8(114)~(122)LRR_4(160)~(168)LRR_8(227)~(194)LRR_8(250)~(215)LRR_8(275)~(241)LRR_8(299)~(264)LRR_8(323)~(387)LRR_8(443)~(499)I-set(599)~(603)I-set(693)~(697)I-set(784)                                                                                                                                                                                                                    |
| Q8N5A5 | (333)G-patch(374)                                                                                                                                                                                                                                                                                                                                                                                 |
| Q9UHC7 | (57)zf-CCCH(80)~(88)zf-CCCH(110)~(210)zf-CCCH(233)~(360)Torus(397)~(400)MKRN1_C(480)                                                                                                                                                                                                                                                                                                              |
| P60866 | (21)Ribosomal_S10(115)                                                                                                                                                                                                                                                                                                                                                                            |
| P21127 | (441)Pkinase(723)                                                                                                                                                                                                                                                                                                                                                                                 |
| Q16576 | (18)CAF1C_H4-bd(87)~(172)WD40(205)~(221)WD40(255)~(264)WD40(301)~(309)WD40(345)~(369)WD40(401)                                                                                                                                                                                                                                                                                                    |
| Q96LW1 | (14)KRAB(54)~(214)zf-C2H2(236)~(228)zf-H2C2_2(252)~(257)zf-H2C2_2(281)~(298)zf-C2H2(320)~(368)zf-H2C2_2(392)~(397)zf-H2C2_2(421)~(425)zf-H2C2_2(446)~(455)zf-H2C2_2(476)~(481)zf-H2C2_2(503)~(508)zf-H2C2_2(532)~(537)zf-H2C2_2(560)~(565)zf-H2C2_2(588)                                                                                                                                          |
| Q8N1W2 | (309)zf-H2C2_2(334)~(337)zf-H2C2_2(362)~(365)zf-H2C2_2(390)~(422)zf-H2C2_2(445)~(435)zf-C2H2(457)~(450)zf-H2C2_2(473)~(491)zf-C2H2(513)~(505)zf-H2C2_2(529)~(534)zf-H2C2_2(557)~(547)zf-C2H2(569)~(561)zf-H2C2_2(584)                                                                                                                                                                             |
| Q15233 | (76)RRM_1(140)~(150)RRM_1(210)~(221)NOPS(272)                                                                                                                                                                                                                                                                                                                                                     |
| Q149M9 | (337)NACHT(505)~(818)Nucleoporin_N(900)~(903)WD40(938)~(956)Nucleoporin_N(994)~(1132)Nucleoporin_N(1228)~(1382)Nucleoporin_N(1434)                                                                                                                                                                                                                                                                |
| P49773 | (24)HIT(120)                                                                                                                                                                                                                                                                                                                                                                                      |
| P61574 | (19)HERV-K_REC(105)                                                                                                                                                                                                                                                                                                                                                                               |
| O15530 | (83)Pkinase(330)~(446)PH_3(547)                                                                                                                                                                                                                                                                                                                                                                   |
| Q8N9B4 | (31)Ank_2(128)~(136)Ank_2(224)~(240)Ank_4(290)                                                                                                                                                                                                                                                                                                                                                    |
| Q53HC9 | (222)WD40(257)~(263)WD40(297)                                                                                                                                                                                                                                                                                                                                                                     |
| Q16637 | (26)SMN(290)                                                                                                                                                                                                                                                                                                                                                                                      |
| P01720 | (7)V-set(110)                                                                                                                                                                                                                                                                                                                                                                                     |
| Q14667 | (27)Fmp27(473)~(1028)Fmp27_GFWDK(1160)~(1703)Apt1(2176)                                                                                                                                                                                                                                                                                                                                           |
| Q9NQ50 | (45)MRP-L28(199)                                                                                                                                                                                                                                                                                                                                                                                  |
| Q7Z5W3 | (158)Bin3(263)                                                                                                                                                                                                                                                                                                                                                                                    |
| Q147U1 | (8)KRAB(46)~(199)zf-C2H2(220)~(212)zf-H2C2_2(237)~(246)zf-H2C2_2(265)~(254)zf-C2H2(276)~(269)zf-H2C2_2(293)~(297)zf-H2C2_2(321)~(327)zf-H2C2_2(348)~(353)zf-H2C2_2(377)~(381)zf-H2C2_2(405)~(409)zf-H2C2_2(433)~(437)zf-H2C2_2(460)~(464)zf-                                                                                                                                                      |

|        |                                                                                                                                                                                                                                                                                                     |
|--------|-----------------------------------------------------------------------------------------------------------------------------------------------------------------------------------------------------------------------------------------------------------------------------------------------------|
|        | H2C2_2(488)~(493)zf-H2C2_2(516)                                                                                                                                                                                                                                                                     |
| Q96EY9 | (174)dCMP_cyt_deam_1(309)                                                                                                                                                                                                                                                                           |
| P50914 | (47)Ribosomal_L14e(120)                                                                                                                                                                                                                                                                             |
| Q7RTY5 | (28)Trypsin(262)                                                                                                                                                                                                                                                                                    |
| Q6IPR3 | (10)TYW3(193)                                                                                                                                                                                                                                                                                       |
| P51991 | (37)RRM_1(94)~(128)RRM_1(191)                                                                                                                                                                                                                                                                       |
| Q7Z410 | (203)Trypsin(431)~(504)Trypsin(731)~(827)Trypsin(1053)                                                                                                                                                                                                                                              |
| A6NE52 | (326)WD40(361)~(686)WD40(716)                                                                                                                                                                                                                                                                       |
| Q7KZI7 | (53)Pkinase(304)~(746)KA1(788)                                                                                                                                                                                                                                                                      |
| Q8NEK5 | (8)KRAB(48)~(197)zf-C2H2(219)~(212)zf-H2C2_2(236)~(239)zf-H2C2_2(262)~(268)zf-H2C2_2(291)~(296)zf-H2C2_2(318)~(324)zf-H2C2_2(347)~(352)zf-H2C2_2(375)~(379)zf-H2C2_2(403)~(408)zf-H2C2_2(431)~(435)zf-H2C2_2(460)~(464)zf-H2C2_2(486)                                                               |
| B4DXR9 | (4)KRAB(44)~(181)zf-H2C2_2(205)~(216)zf-H2C2_2(234)~(254)zf-C2H2(272)~(265)zf-H2C2_2(285)~(294)zf-H2C2_2(316)~(321)zf-H2C2_2(345)~(349)zf-H2C2_2(372)~(377)zf-H2C2_2(401)~(405)zf-H2C2_2(427)~(432)zf-H2C2_2(455)~(461)zf-H2C2_2(484)~(488)zf-H2C2_2(511)~(517)zf-H2C2_2(540)~(530)Zn-ribbon_8(566) |
| Q5VTE0 | (5)GTP_EFTU(237)~(260)GTP_EFTU_D2(325)~(336)GTP_EFTU_D3(441)                                                                                                                                                                                                                                        |
| P53778 | (27)Pkinase(311)                                                                                                                                                                                                                                                                                    |
| Q9H093 | (53)Pkinase(303)                                                                                                                                                                                                                                                                                    |
| Q96B70 | (320)AKAP7_NLS(463)                                                                                                                                                                                                                                                                                 |
| P41182 | (22)BTB(128)~(532)zf-H2C2_2(556)~(546)zf-C2H2(568)~(560)zf-H2C2_2(584)~(588)zf-H2C2_2(612)~(616)zf-H2C2_2(641)~(645)zf-H2C2_2(668)                                                                                                                                                                  |
| Q8NA58 | (15)CAF1(362)                                                                                                                                                                                                                                                                                       |
| Q8N983 | (43)L51_S25_CI-B8(92)                                                                                                                                                                                                                                                                               |
| Q96J01 | (50)WD40(81)~(94)WD40(128)~(131)eIF2A(243)                                                                                                                                                                                                                                                          |
| Q13131 | (29)Pkinase(279)~(406)AdenylateSensor(480)                                                                                                                                                                                                                                                          |
| Q6IA86 | (52)WD40(90)~(102)WD40(143)~(199)WD40(237)~(278)WD40(319)~(383)WD40(414)~(605)WD40(642)~(665)WD40(696)                                                                                                                                                                                              |
| Q9BUR4 | (358)WD40(396)~(415)WD40(441)                                                                                                                                                                                                                                                                       |
| O94906 | (13)PRP1_N(169)~(289)TPR_19(344)~(409)TPR_14(443)~(576)TPR_14(615)~(621)TPR_19(677)~(726)TPR_19(777)                                                                                                                                                                                                |
| Q8WUF8 | (80)Arb2(222)                                                                                                                                                                                                                                                                                       |
| P56730 | (174)SRCR(270)~(284)SRCR(379)~(391)SRCR(485)~(504)SRCR(599)~(631)Trypsin(869)                                                                                                                                                                                                                       |
| Q9BRS2 | (193)RIO1(380)                                                                                                                                                                                                                                                                                      |
| P50150 | (12)G-gamma(75)                                                                                                                                                                                                                                                                                     |
| P78344 | (78)MIF4G(307)~(547)MA3(655)~(827)W2(904)                                                                                                                                                                                                                                                           |
| Q14012 | (22)Pkinase(276)                                                                                                                                                                                                                                                                                    |
| O15075 | (75)DCX(137)~(204)DCX(263)~(390)Pkinase(647)                                                                                                                                                                                                                                                        |
| Q96EY7 | (254)PPR_2(300)~(333)PPR_3(367)                                                                                                                                                                                                                                                                     |
| Q8TBZ6 | (111)tRNA_m1G_MT(276)                                                                                                                                                                                                                                                                               |
| Q8NEM1 | (13)KRAB(53)~(182)zf-C2H2(204)~(225)zf-H2C2_2(248)~(253)zf-H2C2_2(276)~(281)zf-H2C2_2(303)~(309)zf-H2C2_2(332)~(336)zf-H2C2_2(360)~(364)zf-H2C2_2(387)~(392)zf-H2C2_2(415)~(420)zf-H2C2_2(444)~(449)zf-H2C2_2(471)~(477)zf-H2C2_2(500)~(490)zf-C2H2(512)                                            |
| Q96MH2 | (102)HEXIM(226)                                                                                                                                                                                                                                                                                     |
| P06312 | (26)V-set(116)                                                                                                                                                                                                                                                                                      |
| Q9BZJ0 | (245)Suf(375)~(256)HAT(286)~(357)HAT(388)~(394)Suf(470)~(574)TPR_14(607)~(620)HAT(650)~(645)Suf(823)~(691)HAT(719)                                                                                                                                                                                  |
| A6NK75 | (13)KRAB(53)~(169)zf-H2C2_2(191)~(196)zf-H2C2_2(220)~(224)zf-H2C2_2(248)~(252)zf-H2C2_2(276)~(280)zf-H2C2_2(304)~(309)zf-H2C2_2(332)~(337)zf-                                                                                                                                                       |

|        |                                                                                                                                                                                                                                                                                                                                                           |
|--------|-----------------------------------------------------------------------------------------------------------------------------------------------------------------------------------------------------------------------------------------------------------------------------------------------------------------------------------------------------------|
|        | H2C2_2(361)~(364)zf-H2C2_2(389)~(378)zf-C2H2(400)~(420)zf-H2C2_2(443)~(449)zf-H2C2_2(472)~(477)zf-H2C2_2(500)~(504)zf-H2C2_2(529)                                                                                                                                                                                                                         |
| Q9UK59 | (1)Metallophos(229)~(246)DBR1(376)                                                                                                                                                                                                                                                                                                                        |
| Q8N6D5 | (18)Ank_2(103)~(118)Ank_2(206)~(182)Ank_2(273)                                                                                                                                                                                                                                                                                                            |
| P46777 | (27)Ribosomal_L18p(173)~(192)Ribosomal_L18_c(283)                                                                                                                                                                                                                                                                                                         |
| Q68CQ4 | (276)UTP25(751)                                                                                                                                                                                                                                                                                                                                           |
| Q9UK58 | (78)Cyclin_N(196)~(217)Cyclin_N(270)                                                                                                                                                                                                                                                                                                                      |
| Q13541 | (7)eIF_4EBP(118)                                                                                                                                                                                                                                                                                                                                          |
| P57058 | (66)Pkinase(320)                                                                                                                                                                                                                                                                                                                                          |
| Q9BQR3 | (36)Trypsin(272)                                                                                                                                                                                                                                                                                                                                          |
| Q68EA5 | (4)KRAB(44)~(127)zf-H2C2_2(151)~(196)zf-C2H2_4(218)~(211)zf-H2C2_2(233)~(239)zf-H2C2_2(261)~(267)zf-H2C2_2(291)~(294)zf-H2C2_2(318)~(323)zf-H2C2_2(347)~(353)zf-H2C2_2(374)~(379)zf-H2C2_2(403)~(407)zf-H2C2_2(430)~(435)zf-H2C2_2(459)~(465)zf-H2C2_2(486)~(494)zf-H2C2_2(514)~(519)zf-H2C2_2(542)                                                       |
| Q58WW2 | (45)WD40(75)~(761)WD40(789)                                                                                                                                                                                                                                                                                                                               |
| Q9H501 | (35)NUC153(49)~(759)NUC153(787)                                                                                                                                                                                                                                                                                                                           |
| Q5TA45 | (22)Lactamase_B_6(194)~(245)Beta-Casp(363)~(377)RMMBL(417)                                                                                                                                                                                                                                                                                                |
| O75914 | (69)PBD(141)~(283)Pkinase(534)                                                                                                                                                                                                                                                                                                                            |
| Q9NR30 | (210)DEAD(380)~(437)Helicase_C(532)~(620)GUCT(715)                                                                                                                                                                                                                                                                                                        |
| P18135 | (26)V-set(127)                                                                                                                                                                                                                                                                                                                                            |
| O95170 | (448)WD40(481)~(486)WD40(521)~(565)WD40(599)                                                                                                                                                                                                                                                                                                              |
| Q9BW92 | (61)TGS(120)~(400)tRNA-synt_2b(601)~(615)HGTP_anticodon(705)                                                                                                                                                                                                                                                                                              |
| Q9HBW1 | (76)LRR_8(133)~(89)LRR_5(204)~(243)LRR_8(301)                                                                                                                                                                                                                                                                                                             |
| O43361 | (9)KRAB(48)~(211)zf-H2C2_2(234)~(266)zf-H2C2_2(309)~(313)zf-H2C2_2(335)~(341)zf-H2C2_2(363)~(371)zf-H2C2_2(393)~(397)zf-H2C2_2(420)~(425)zf-H2C2_2(448)~(438)zf-C2H2(460)~(498)zf-H2C2_2(521)~(511)zf-C2H2(533)~(571)zf-H2C2_2(593)~(599)zf-H2C2_2(622)~(627)zf-H2C2_2(649)~(657)zf-H2C2_2(675)~(685)zf-H2C2_2(707)~(696)zf-C2H2(718)~(743)zf-H2C2_2(762) |
| Q9Y291 | (7)MRP-S33(96)                                                                                                                                                                                                                                                                                                                                            |
| Q9BRP7 | (7)DUF2431(175)~(530)FDX-ACB(623)                                                                                                                                                                                                                                                                                                                         |
| Q92876 | (23)Trypsin(237)                                                                                                                                                                                                                                                                                                                                          |
| Q9H0S4 | (48)DEAD(215)~(252)Helicase_C(358)                                                                                                                                                                                                                                                                                                                        |
| Q96PF2 | (17)Pkinase(272)                                                                                                                                                                                                                                                                                                                                          |
| Q92615 | (161)La(215)                                                                                                                                                                                                                                                                                                                                              |
| Q9Y4Z0 | (6)LSM(69)                                                                                                                                                                                                                                                                                                                                                |
| P35606 | (91)WD40(127)~(132)WD40(170)~(178)WD40(215)~(220)WD40(256)~(319)Coatomer_W DAD(762)                                                                                                                                                                                                                                                                       |
| Q6WRI0 | (82)LRR_8(141)~(190)LRR_8(219)~(486)I-set(556)~(584)I-set(661)~(1657)I-set(1740)~(1749)I-set(1837)~(1847)I-set(1933)~(1943)I-set(2025)~(2048)I-set(2136)~(2143)I-set(2230)~(2252)I-set(2330)~(2339)I-set(2428)~(2439)I-set(2518)~(2530)I-set(2622)                                                                                                        |
| Q5K4E3 | (47)Trypsin(286)~(326)Trypsin(453)~(601)Trypsin(788)                                                                                                                                                                                                                                                                                                      |
| Q9Y3E5 | (65)PTH2(179)                                                                                                                                                                                                                                                                                                                                             |
| Q9Y572 | (22)Pkinase(280)~(417)RHIM(467)                                                                                                                                                                                                                                                                                                                           |
| Q09013 | (71)Pkinase(339)~(470)DMPK_coil(530)                                                                                                                                                                                                                                                                                                                      |
| Q4LE39 | (170)RBB1NT(262)~(308)ARID(394)~(572)Tudor-knot(624)                                                                                                                                                                                                                                                                                                      |
| P51814 | (69)KRAB(109)~(313)zf-C2H2(335)~(369)zf-C2H2(391)~(383)zf-H2C2_2(406)~(412)zf-H2C2_2(435)~(439)zf-H2C2_2(464)~(467)zf-H2C2_2(490)~(495)zf-H2C2_2(519)~(509)zf-C2H2(531)~(551)zf-H2C2_2(575)~(579)zf-H2C2_2(602)~(621)zf-C2H2(643)~(636)zf-H2C2_2(658)~(677)zf-C2H2(699)~(719)zf-H2C2_2(743)~(748)zf-H2C2_2(770)~(776)zf-                                  |

|        |                                                                                                                                                                                                                                                                                                                     |
|--------|---------------------------------------------------------------------------------------------------------------------------------------------------------------------------------------------------------------------------------------------------------------------------------------------------------------------|
|        | H2C2_2(799)                                                                                                                                                                                                                                                                                                         |
| Q96CX3 | (23)zf-C2H2(44)~(36)zf-H2C2_2(59)~(64)zf-H2C2_2(87)~(93)zf-H2C2_2(115)~(121)zf-H2C2_2(144)~(149)zf-H2C2_2(172)~(177)zf-H2C2_2(201)~(204)zf-H2C2_2(228)~(232)zf-H2C2_2(257)                                                                                                                                          |
| Q8IUX4 | (17)APOBEC_N(186)~(200)APOBEC_N(370)                                                                                                                                                                                                                                                                                |
| Q56UN5 | (1062)Pkinase(1324)                                                                                                                                                                                                                                                                                                 |
| Q8TDD1 | (120)DEAD(283)~(324)Helicase_C(433)~(714)DBP10CT(774)                                                                                                                                                                                                                                                               |
| P09871 | (19)CUB(127)~(175)CUB(287)~(294)Sushi(354)~(359)Sushi(413)~(438)Trypsin(675)                                                                                                                                                                                                                                        |
| Q9UN86 | (11)NTF2(133)~(333)RRM_1(389)                                                                                                                                                                                                                                                                                       |
| Q13163 | (19)PB1(90)~(170)Pkinase(419)                                                                                                                                                                                                                                                                                       |
| Q9NQV7 | (171)SSXRD(201)~(388)zf-H2C2_5(411)~(542)zf-H2C2_2(562)~(566)zf-H2C2_2(590)~(595)zf-H2C2_2(618)~(623)zf-H2C2_2(646)~(651)zf-H2C2_2(674)~(679)zf-H2C2_2(702)~(707)zf-H2C2_2(731)~(734)zf-H2C2_2(757)~(762)zf-H2C2_2(785)~(790)zf-H2C2_2(815)~(818)zf-H2C2_2(843)~(846)zf-H2C2_2(870)~(860)zf-C2H2(882)               |
| Q9NYY3 | (84)Pkinase(334)~(511)POLO_box(572)~(608)POLO_box(676)                                                                                                                                                                                                                                                              |
| O95900 | (89)TruB_N(231)                                                                                                                                                                                                                                                                                                     |
| P62753 | (1)Ribosomal_S6e(126)                                                                                                                                                                                                                                                                                               |
| Q9Y2R9 | (82)Ribosomal_S7(234)                                                                                                                                                                                                                                                                                               |
| P26639 | (83)TGS(143)~(250)tRNA_SAD(298)~(402)tRNA-synt_2b(608)~(620)HGTP_anticodon(710)                                                                                                                                                                                                                                     |
| O75346 | (5)KRAB(44)~(172)zf-C2H2(194)~(187)zf-H2C2_2(210)~(214)zf-H2C2_2(239)~(242)zf-H2C2_2(266)~(270)zf-H2C2_2(295)~(312)zf-C2H2(334)~(326)zf-H2C2_2(349)~(354)zf-H2C2_2(379)~(385)zf-H2C2_2(406)~(411)zf-H2C2_2(434)~(439)zf-H2C2_2(461)                                                                                 |
| Q5H9K5 | (57)zf-met(80)~(122)zf-met(145)~(175)zf-met(199)                                                                                                                                                                                                                                                                    |
| Q9BQI3 | (167)Pkinase(239)~(372)Pkinase(583)                                                                                                                                                                                                                                                                                 |
| Q9NQE9 | (48)DcpS_C(155)                                                                                                                                                                                                                                                                                                     |
| O75891 | (1)Formyl_trans_N(180)~(205)Formyl_trans_C(309)~(430)Aldedh(898)                                                                                                                                                                                                                                                    |
| Q6S8J7 | (69)Ank_2(161)~(133)Ank_4(185)~(205)Ank_2(286)                                                                                                                                                                                                                                                                      |
| Q6AW86 | (1)KRAB(41)~(257)zf-C2H2(279)~(271)zf-H2C2_2(295)~(299)zf-H2C2_2(324)~(327)zf-H2C2_2(352)~(341)zf-C2H2(363)~(384)zf-H2C2_2(407)~(415)zf-H2C2_2(436)~(439)zf-H2C2_2(463)~(468)zf-H2C2_2(490)                                                                                                                         |
| P57772 | (8)GTP_EFTU(207)                                                                                                                                                                                                                                                                                                    |
| Q13105 | (14)BTB(110)~(320)zf-H2C2_2(344)~(350)zf-H2C2_2(371)~(377)zf-H2C2_2(401)~(390)zf-C2H2(412)~(404)zf-H2C2_2(428)~(418)zf-C2H2(440)~(446)zf-C2H2(468)~(475)zf-C2H2(496)~(488)zf-H2C2_2(512)~(516)zf-H2C2_2(541)~(545)zf-H2C2_2(568)~(558)zf-C2H2(580)~(600)zf-H2C2_2(624)~(717)zf-C2H2_4(739)                          |
| Q04727 | (8)TLE_N(138)~(611)WD40(647)                                                                                                                                                                                                                                                                                        |
| Q96JL9 | (4)KRAB(41)~(203)KRAB(242)~(366)zf-C2H2(388)~(394)zf-C2H2(416)~(408)zf-H2C2_2(433)~(437)zf-H2C2_2(460)~(464)zf-H2C2_2(487)~(492)zf-H2C2_2(517)~(506)zf-C2H2(528)~(549)zf-H2C2_2(572)~(576)zf-H2C2_2(600)~(590)zf-C2H2(612)~(618)zf-C2H2(640)                                                                        |
| P01621 | (10)V-set(95)                                                                                                                                                                                                                                                                                                       |
| Q6NX49 | (14)KRAB(54)~(370)zf-H2C2_2(390)~(394)zf-H2C2_2(419)~(425)zf-H2C2_2(445)~(450)zf-H2C2_2(474)~(479)zf-H2C2_2(502)~(506)zf-H2C2_2(530)~(537)zf-H2C2_2(557)~(562)zf-H2C2_2(586)~(591)zf-H2C2_2(614)~(619)zf-H2C2_2(642)~(647)zf-H2C2_2(670)~(674)zf-H2C2_2(698)                                                        |
| Q3MIS6 | (9)KRAB(48)~(213)zf-C2H2(235)~(228)zf-H2C2_2(251)~(255)zf-H2C2_2(279)~(284)zf-H2C2_2(307)~(311)zf-H2C2_2(336)~(340)zf-H2C2_2(363)~(368)zf-H2C2_2(391)~(411)zf-C2H2(431)~(424)zf-H2C2_2(446)~(451)zf-H2C2_2(475)~(479)zf-H2C2_2(504)~(507)zf-H2C2_2(531)~(536)zf-H2C2_2(558)~(564)zf-H2C2_2(587)~(591)zf-H2C2_2(616) |
| Q9NSI2 | (101)SLX9(219)                                                                                                                                                                                                                                                                                                      |
| P63135 | (76)RVT_1(245)~(252)RVT_thumb(316)~(462)RNase_H(588)~(592)Integrase_Zn(628)~(646)rve(755)~(875)HERV-K_env_2(1043)~(1246)GP41(1442)                                                                                                                                                                                  |



|        |                                                                                                                                                                                                                                                                                                                       |
|--------|-----------------------------------------------------------------------------------------------------------------------------------------------------------------------------------------------------------------------------------------------------------------------------------------------------------------------|
| Q96DH6 | (24)RRM_1(89)~(112)RRM_1(178)                                                                                                                                                                                                                                                                                         |
| Q14590 | (8)KRAB(48)~(333)zf-H2C2_2(357)~(361)zf-H2C2_2(386)~(389)zf-H2C2_2(413)~(417)zf-H2C2_2(441)~(448)zf-H2C2_2(469)~(476)zf-H2C2_2(498)~(502)zf-H2C2_2(525)~(530)zf-H2C2_2(552)~(560)zf-H2C2_2(581)~(585)zf-H2C2_2(609)~(613)zf-H2C2_2(637)~(641)zf-H2C2_2(665)~(670)zf-H2C2_2(693)~(701)zf-H2C2_2(721)                   |
| Q8IYX4 | (60)RRM_1(122)~(141)RRM_1(199)~(254)DND1_DSRM(332)                                                                                                                                                                                                                                                                    |
| Q13247 | (4)RRM_1(64)~(112)RRM_1(177)                                                                                                                                                                                                                                                                                          |
| Q4VXU2 | (13)RRM_1(83)~(101)RRM_1(168)~(193)RRM_1(261)~(296)RRM_1(363)~(534)PABP(600)                                                                                                                                                                                                                                          |
| Q9BQ04 | (4)RRM_1(64)~(81)RRM_1(142)                                                                                                                                                                                                                                                                                           |
| Q9Y580 | (12)RRM_1(81)                                                                                                                                                                                                                                                                                                         |
| P00740 | (52)Gla(91)~(227)Trypsin(454)                                                                                                                                                                                                                                                                                         |
| Q9BQ48 | (51)Ribosomal_L34(92)                                                                                                                                                                                                                                                                                                 |
| Q96C86 | (45)DepS(146)~(174)DepS_C(291)                                                                                                                                                                                                                                                                                        |
| Q7Z5Q1 | (331)RRM_7(420)~(442)RRM_1(500)~(513)CEBP_ZZ(575)                                                                                                                                                                                                                                                                     |
| O15455 | (52)LRR_8(111)~(75)LRR_8(133)~(104)LRR_5(218)~(274)LRR_8(330)~(343)LRR_8(388)~(409)LRR_8(467)~(480)LRR_8(542)~(562)LRR_8(622)                                                                                                                                                                                         |
| P01722 | (6)V-set(111)                                                                                                                                                                                                                                                                                                         |
| Q05655 | (159)C1_1(209)~(231)C1_1(282)~(352)Pkinase(603)                                                                                                                                                                                                                                                                       |
| Q15637 | (18)SF1-HH(130)                                                                                                                                                                                                                                                                                                       |
| O60285 | (55)Pkinase(306)                                                                                                                                                                                                                                                                                                      |
| Q86UN2 | (80)LRR_8(133)~(126)LRR_8(185)~(150)LRR_8(209)~(222)LRR_4(255)                                                                                                                                                                                                                                                        |
| O75325 | (113)LRR_8(153)~(145)LRR_8(200)~(214)LRR_8(273)~(310)LRR_8(371)~(430)I-set(514)                                                                                                                                                                                                                                       |
| P49336 | (26)Pkinase(335)                                                                                                                                                                                                                                                                                                      |
| P17014 | (8)KRAB(48)~(255)zf-H2C2_2(278)~(287)zf-H2C2_2(306)~(312)zf-H2C2_2(335)~(340)zf-H2C2_2(362)~(367)zf-H2C2_2(391)~(381)zf-C2H2(403)~(424)zf-H2C2_2(448)~(452)zf-H2C2_2(475)~(479)zf-H2C2_2(503)~(508)zf-H2C2_2(531)~(538)zf-H2C2_2(559)~(564)zf-H2C2_2(586)~(591)zf-H2C2_2(615)~(620)zf-H2C2_2(644)~(648)zf-H2C2_2(672) |
| Q9UKE5 | (26)Pkinase(289)~(1052)CNH(1330)                                                                                                                                                                                                                                                                                      |
| Q8IYX0 | (16)KRAB(56)~(171)zf-H2C2_2(193)~(212)zf-C2H2(234)~(227)zf-H2C2_2(250)~(255)zf-H2C2_2(279)~(283)zf-H2C2_2(306)~(310)zf-H2C2_2(334)~(339)zf-H2C2_2(362)~(367)zf-H2C2_2(390)~(380)zf-C2H2(402)                                                                                                                          |
| P51812 | (68)Pkinase(327)~(422)Pkinase(679)                                                                                                                                                                                                                                                                                    |
| O15213 | (440)BING4CT(517)                                                                                                                                                                                                                                                                                                     |
| Q6I9Y2 | (7)THOC7(139)~(141)THOC7(190)                                                                                                                                                                                                                                                                                         |
| Q8N302 | (435)FHA(508)~(620)G-patch(662)                                                                                                                                                                                                                                                                                       |
| Q9BXX2 | (42)Ank_2(136)~(143)Ank_2(234)~(1084)CCDC144C(1373)                                                                                                                                                                                                                                                                   |
| P01600 | (6)V-set(106)                                                                                                                                                                                                                                                                                                         |
| Q92918 | (17)Pkinase(273)~(506)CNH(797)                                                                                                                                                                                                                                                                                        |
| P08240 | (28)SRP-alpha_N(281)~(419)SRP54(636)                                                                                                                                                                                                                                                                                  |
| Q5SXM1 | (112)zf-H2C2_2(135)~(139)zf-H2C2_2(162)~(168)zf-H2C2_2(190)~(196)zf-H2C2_2(220)~(223)zf-H2C2_2(247)~(251)zf-H2C2_2(275)~(279)zf-H2C2_2(304)~(307)zf-H2C2_2(331)~(335)zf-H2C2_2(360)~(363)zf-H2C2_2(387)~(391)zf-H2C2_2(416)~(419)zf-H2C2_2(443)~(448)zf-H2C2_2(471)~(475)zf-H2C2_2(499)                               |
| P98073 | (59)SEA(149)~(184)Ldl_recept_a(221)~(225)CUB(331)~(347)MAM(503)~(524)CUB(631)~(642)Ldl_recept_a(677)~(785)Trypsin(1014)                                                                                                                                                                                               |
| Q15776 | (47)SCAN(132)~(222)KRAB(259)~(322)zf-C2H2(344)~(337)zf-H2C2_2(361)~(350)zf-C2H2(372)~(364)zf-H2C2_2(388)~(396)zf-H2C2_2(416)~(424)zf-H2C2_2(445)~(452)zf-H2C2_2(472)~(480)zf-H2C2_2(500)~(505)zf-H2C2_2(527)~(533)zf-H2C2_2(555)                                                                                      |
| Q7L014 | (396)DEAD(568)~(604)Helicase_C(714)                                                                                                                                                                                                                                                                                   |

|        |                                                                                                                                                                                                                                                                                                                                                                                                        |
|--------|--------------------------------------------------------------------------------------------------------------------------------------------------------------------------------------------------------------------------------------------------------------------------------------------------------------------------------------------------------------------------------------------------------|
| P01622 | (6)V-set(106)                                                                                                                                                                                                                                                                                                                                                                                          |
| Q9H4A3 | (226)Pkinase(479)~(500)OSR1_C(537)                                                                                                                                                                                                                                                                                                                                                                     |
| P29728 | (49)NTP_transf_2(86)~(154)OAS1_C(336)~(373)NTP_transf_2(437)~(497)OAS1_C(682)                                                                                                                                                                                                                                                                                                                          |
| Q08170 | (4)RRM_1(64)~(106)RRM_1(171)                                                                                                                                                                                                                                                                                                                                                                           |
| P53621 | (44)WD40(79)~(84)WD40(121)~(126)WD40(163)~(199)WD40(232)~(242)WD40(277)~(342)Coatomer_WDAD(766)~(815)COPI_C(1224)                                                                                                                                                                                                                                                                                      |
| P01615 | (11)V-set(111)                                                                                                                                                                                                                                                                                                                                                                                         |
| Q9P2N5 | (602)RRM_6(668)                                                                                                                                                                                                                                                                                                                                                                                        |
| Q8N2I2 | (206)zf-H2C2_2(226)~(231)zf-H2C2_2(254)~(272)zf-C2H2(294)~(287)zf-H2C2_2(310)~(318)zf-H2C2_2(336)~(344)zf-H2C2_2(366)~(372)zf-H2C2_2(394)~(402)zf-H2C2_2(422)~(427)zf-H2C2_2(449)                                                                                                                                                                                                                      |
| A6NKH3 | (3)Ribosomal_L37ae(89)                                                                                                                                                                                                                                                                                                                                                                                 |
| Q9BQ52 | (61)Lactamase_B_4(120)~(511)Lactamase_B_2(725)                                                                                                                                                                                                                                                                                                                                                         |
| P01707 | (5)V-set(110)                                                                                                                                                                                                                                                                                                                                                                                          |
| Q9Y2W6 | (55)KH_1(115)~(127)KH_1(190)~(304)TUDOR(422)                                                                                                                                                                                                                                                                                                                                                           |
| Q9UPR3 | (77)EST1(188)~(197)EST1_DNA_bind(412)~(649)EST1_DNA_bind(744)                                                                                                                                                                                                                                                                                                                                          |
| Q96C45 | (7)Pkinase(279)                                                                                                                                                                                                                                                                                                                                                                                        |
| Q9UI10 | (219)IF-2B(508)                                                                                                                                                                                                                                                                                                                                                                                        |
| P35626 | (55)RGS(174)~(192)Pkinase(453)~(560)PH(649)                                                                                                                                                                                                                                                                                                                                                            |
| Q14004 | (707)Pkinase(998)                                                                                                                                                                                                                                                                                                                                                                                      |
| O75116 | (92)Pkinase(354)~(978)Rho_Binding(1046)                                                                                                                                                                                                                                                                                                                                                                |
| Q96JK2 | (47)WD40(81)~(135)WD40(171)~(327)WD40(361)                                                                                                                                                                                                                                                                                                                                                             |
| Q9UPY3 | (32)ResIII(207)~(444)Helicase_C(554)~(630)Dicer_dimer(716)~(902)PAZ(1064)~(1313)Ribonuclease_3(1575)~(1702)Ribonuclease_3(1824)                                                                                                                                                                                                                                                                        |
| Q86WZ6 | (23)KRAB(63)~(246)zf-H2C2_2(261)~(276)zf-C2H2(291)~(316)zf-H2C2_2(335)~(341)zf-H2C2_2(362)~(366)zf-H2C2_2(389)~(394)zf-H2C2_2(418)~(426)zf-H2C2_2(447)~(454)zf-H2C2_2(475)~(482)zf-H2C2_2(502)~(506)zf-H2C2_2(530)~(535)zf-H2C2_2(559)~(562)zf-H2C2_2(586)~(593)zf-H2C2_2(614)~(619)zf-H2C2_2(642)~(647)zf-H2C2_2(670)~(677)zf-H2C2_2(698)~(702)zf-H2C2_2(726)~(730)zf-H2C2_2(754)~(759)zf-H2C2_2(783) |
| Q4UJ75 | (37)Ank_2(130)~(137)Ank_2(229)~(514)CCDC144C(805)                                                                                                                                                                                                                                                                                                                                                      |
| Q9NUP7 | (17)zf-TRM13_CCCH(45)~(165)TRM13(469)                                                                                                                                                                                                                                                                                                                                                                  |
| P62244 | (6)Ribosomal_S8(130)                                                                                                                                                                                                                                                                                                                                                                                   |
| P00748 | (47)fn2(88)~(98)EGF(129)~(135)fn1(170)~(178)EGF(207)~(217)Kring(295)~(374)Trypsin(609)                                                                                                                                                                                                                                                                                                                 |
| Q5TFQ8 | (37)V-set(143)~(158)C1-set(235)~(261)C1-set(338)                                                                                                                                                                                                                                                                                                                                                       |
| O95218 | (10)zf-RanBP(35)~(66)zf-RanBP(93)                                                                                                                                                                                                                                                                                                                                                                      |
| Q99633 | (84)PRP4(111)~(190)Prp18(331)                                                                                                                                                                                                                                                                                                                                                                          |
| P46782 | (62)Ribosomal_S7(204)                                                                                                                                                                                                                                                                                                                                                                                  |
| O60287 | (78)Npal(393)~(1668)NopRA1(1857)                                                                                                                                                                                                                                                                                                                                                                       |
| Q96CS4 | (30)KRAB(69)~(151)zf-C2H2(168)~(177)zf-C2H2(199)~(219)zf-H2C2_2(243)~(248)zf-H2C2_2(272)~(276)zf-H2C2_2(299)~(303)zf-H2C2_2(328)~(332)zf-H2C2_2(355)~(360)zf-H2C2_2(383)~(373)zf-C2H2(395)~(416)zf-H2C2_2(439)~(429)zf-C2H2(451)~(443)zf-H2C2_2(467)                                                                                                                                                   |
| Q96MR6 | (388)WD40(417)~(503)WD40(540)                                                                                                                                                                                                                                                                                                                                                                          |
| Q9H8H2 | (255)DEAD(431)~(508)Helicase_C(623)~(695)DUF4217(754)                                                                                                                                                                                                                                                                                                                                                  |
| P0CF74 | (14)C1-set(95)                                                                                                                                                                                                                                                                                                                                                                                         |
| P04209 | (5)V-set(111)                                                                                                                                                                                                                                                                                                                                                                                          |
| Q9BZL6 | (139)C1_1(189)~(265)C1_1(314)~(555)Pkinase(807)                                                                                                                                                                                                                                                                                                                                                        |
| Q92499 | (26)DEAD(418)~(497)Helicase_C(609)                                                                                                                                                                                                                                                                                                                                                                     |

|        |                                                                                                                                                                                                                                                                                                                                                                                                 |
|--------|-------------------------------------------------------------------------------------------------------------------------------------------------------------------------------------------------------------------------------------------------------------------------------------------------------------------------------------------------------------------------------------------------|
| Q6P0Q8 | (201)DUF1908(475)~(512)Pkinase(785)                                                                                                                                                                                                                                                                                                                                                             |
| P21128 | (22)Somatomedin_B(60)~(88)Somatomedin_B(126)~(139)XendoU(405)                                                                                                                                                                                                                                                                                                                                   |
| Q5SQ80 | (37)Ank_2(130)~(137)Ank_2(229)~(514)CCDC144C(805)                                                                                                                                                                                                                                                                                                                                               |
| Q8IYI8 | (4)KRAB(44)~(174)zf-C2H2(194)~(187)zf-H2C2_2(210)~(217)zf-H2C2_2(239)~(244)zf-H2C2_2(266)~(270)zf-H2C2_2(294)~(300)zf-H2C2_2(320)~(327)zf-H2C2_2(349)~(355)zf-H2C2_2(378)~(382)zf-H2C2_2(406)~(410)zf-H2C2_2(434)~(447)zf-H2C2_2(468)~(473)zf-H2C2_2(489)                                                                                                                                       |
| Q9BWH6 | (225)RPAP1_N(268)~(356)RPAP1_C(421)                                                                                                                                                                                                                                                                                                                                                             |
| Q8IV35 | (182)WD40(220)~(282)WD40(310)~(410)WD40(448)~(467)WD40(503)                                                                                                                                                                                                                                                                                                                                     |
| P61254 | (8)Ribosomal_L26(122)                                                                                                                                                                                                                                                                                                                                                                           |
| Q9H0H0 | (34)INTS2(1137)                                                                                                                                                                                                                                                                                                                                                                                 |
| P51884 | (66)LRR_8(102)~(106)LRR_8(130)~(137)LRR_8(171)~(160)LRR_4(200)~(207)LRR_8(266)                                                                                                                                                                                                                                                                                                                  |
| P51398 | (99)DAP3(393)                                                                                                                                                                                                                                                                                                                                                                                   |
| Q96S38 | (16)PX(126)~(240)MIT(304)~(345)Pkinase(424)~(894)Pkinase(1056)                                                                                                                                                                                                                                                                                                                                  |
| O60812 | (18)RRM_1(79)                                                                                                                                                                                                                                                                                                                                                                                   |
| O60508 | (279)WD40(316)~(323)WD40(360)~(409)WD40(445)~(499)WD40(536)~(546)WD40(579)                                                                                                                                                                                                                                                                                                                      |
| P01776 | (12)V-set(114)                                                                                                                                                                                                                                                                                                                                                                                  |
| P62899 | (19)Ribosomal_L31e(100)                                                                                                                                                                                                                                                                                                                                                                         |
| Q9UC06 | (140)zf-C2H2(162)~(154)zf-H2C2_2(178)~(182)zf-H2C2_2(206)~(210)zf-H2C2_2(234)~(238)zf-H2C2_2(262)~(267)zf-H2C2_2(289)~(294)zf-H2C2_2(318)~(322)zf-H2C2_2(346)~(351)zf-H2C2_2(373)~(379)zf-H2C2_2(402)~(406)zf-H2C2_2(428)                                                                                                                                                                       |
| Q15573 | (12)TAF1_subA(286)~(286)TAF1_subA(321)~(321)TAF1_subA(442)                                                                                                                                                                                                                                                                                                                                      |
| Q9HCM9 | (29)zf-C3HC4_4(69)~(339)PRY(388)~(392)SPRY(498)                                                                                                                                                                                                                                                                                                                                                 |
| Q8TC44 | (14)WD40(46)~(56)WD40(87)~(97)WD40(130)~(137)WD40(172)~(188)WD40(214)~(219)WD40(254)~(261)WD40(297)                                                                                                                                                                                                                                                                                             |
| P01860 | (14)C1-set(93)~(177)C1-set(263)~(283)C1-set(364)                                                                                                                                                                                                                                                                                                                                                |
| Q3KQV3 | (14)KRAB(54)~(269)zf-H2C2_2(293)~(296)zf-H2C2_2(320)~(324)zf-H2C2_2(349)~(352)zf-H2C2_2(376)~(366)zf-C2H2(388)~(409)zf-H2C2_2(433)~(452)zf-C2H2(472)~(464)zf-H2C2_2(488)~(492)zf-H2C2_2(516)~(520)zf-H2C2_2(544)~(548)zf-H2C2_2(572)                                                                                                                                                            |
| P11441 | (6)ubiquitin(73)                                                                                                                                                                                                                                                                                                                                                                                |
| Q9BVA0 | (13)WD40(49)~(54)WD40(91)~(97)WD40(133)~(139)WD40(175)~(181)WD40(217)~(493)Katanin_con80(651)                                                                                                                                                                                                                                                                                                   |
| P57721 | (47)KH_1(107)~(131)KH_1(194)~(295)KH_1(357)                                                                                                                                                                                                                                                                                                                                                     |
| Q9UK73 | (11)Ank_2(116)~(122)Ank_2(183)~(155)Ank_4(207)~(187)Ank_2(247)~(478)Ank_2(551)~(484)Ank(530)                                                                                                                                                                                                                                                                                                    |
| Q15349 | (59)Pkinase(318)~(415)Pkinase(672)                                                                                                                                                                                                                                                                                                                                                              |
| Q86U06 | (168)RRM_1(231)~(265)RRM_1(334)~(363)RBM39linker(438)                                                                                                                                                                                                                                                                                                                                           |
| Q14684 | (11)Nop52(218)                                                                                                                                                                                                                                                                                                                                                                                  |
| P51523 | (9)KRAB(48)~(207)zf-C2H2(229)~(253)zf-H2C2_2(273)~(278)zf-H2C2_2(302)~(291)zf-C2H2(313)~(333)zf-H2C2_2(358)~(347)zf-C2H2(369)~(390)zf-H2C2_2(412)~(418)zf-H2C2_2(441)~(446)zf-H2C2_2(470)~(459)zf-C2H2(481)~(474)zf-H2C2_2(497)~(501)zf-H2C2_2(524)~(530)zf-H2C2_2(553)~(558)zf-H2C2_2(581)~(586)zf-H2C2_2(608)~(614)zf-H2C2_2(636)~(642)zf-H2C2_2(666)~(673)zf-H2C2_2(693)~(698)zf-H2C2_2(721) |
| Q8IWB7 | (18)WD40(51)~(192)WD40(227)~(283)FYVE(352)~(376)WD40(394)                                                                                                                                                                                                                                                                                                                                       |
| Q8N8A6 | (223)DEAD(441)~(495)Helicase_C(600)                                                                                                                                                                                                                                                                                                                                                             |
| Q5T8I3 | (3)NT-C2(149)                                                                                                                                                                                                                                                                                                                                                                                   |
| Q9Y2G4 | (37)Ank_5(82)~(95)Ank_5(148)~(145)Ank_2(237)                                                                                                                                                                                                                                                                                                                                                    |
| O75037 | (14)Kinesin(370)~(1299)WD40(1334)~(1444)WD40(1483)~(1578)WD40(1613)                                                                                                                                                                                                                                                                                                                             |

|        |                                                                                                                                                                                                                                                                                                                                                               |
|--------|---------------------------------------------------------------------------------------------------------------------------------------------------------------------------------------------------------------------------------------------------------------------------------------------------------------------------------------------------------------|
| Q96GM8 | (39)CAF1(166)~(169)CAF1(451)                                                                                                                                                                                                                                                                                                                                  |
| O75164 | (15)JmjN(49)~(175)JmjC(291)~(732)PHD_2(766)~(774)zf-HC5HC2H_2(884)                                                                                                                                                                                                                                                                                            |
| O00370 | (11)Exo_endo_phos(230)~(517)RVT_1(773)                                                                                                                                                                                                                                                                                                                        |
| P01815 | (8)V-set(118)                                                                                                                                                                                                                                                                                                                                                 |
| Q8IWZ8 | (189)Surp(240)~(266)Surp(316)~(563)G-patch(606)                                                                                                                                                                                                                                                                                                               |
| Q9UFF9 | (15)CAF1(133)~(147)CAF1(238)                                                                                                                                                                                                                                                                                                                                  |
| Q13685 | (125)WD40(161)~(224)WD40(243)~(247)WD40(286)~(351)WD40(386)~(391)WD40(427)                                                                                                                                                                                                                                                                                    |
| Q5T280 | (74)Methyltrn_RNA_3(364)                                                                                                                                                                                                                                                                                                                                      |
| Q9UKQ9 | (24)Trypsin(244)                                                                                                                                                                                                                                                                                                                                              |
| Q5VTL8 | (48)PRP38(230)                                                                                                                                                                                                                                                                                                                                                |
| O15116 | (12)LSM(75)                                                                                                                                                                                                                                                                                                                                                   |
| Q92636 | (180)GRAM(246)~(304)Beach(575)~(623)WD40(657)~(707)WD40(740)~(883)WD40(914)                                                                                                                                                                                                                                                                                   |
| Q99575 | (176)POP1(257)~(617)POPLD(708)                                                                                                                                                                                                                                                                                                                                |
| O14730 | (265)RIO1(462)                                                                                                                                                                                                                                                                                                                                                |
| P82664 | (80)Ribosomal_S10(173)                                                                                                                                                                                                                                                                                                                                        |
| Q66K89 | (207)zf-H2C2_2(231)~(220)zf-C2H2(242)~(235)zf-H2C2_2(257)~(450)zf-H2C2_2(472)~(463)zf-C2H2(485)~(508)zf-H2C2_2(530)~(536)zf-H2C2_2(556)~(561)zf-H2C2_2(585)                                                                                                                                                                                                   |
| Q5VT25 | (77)Pkinase(343)~(529)KELK(608)~(881)DMPK_coil(941)~(1013)C1_1(1063)~(1233)CNH(1495)                                                                                                                                                                                                                                                                          |
| Q8N2M8 | (40)DRY_EERY(170)                                                                                                                                                                                                                                                                                                                                             |
| Q92667 | (610)KH_1(671)~(705)TUDOR(826)                                                                                                                                                                                                                                                                                                                                |
| Q96HR8 | (180)Gar1(329)                                                                                                                                                                                                                                                                                                                                                |
| Q96L34 | (59)Pkinase(310)~(711)KA1(752)                                                                                                                                                                                                                                                                                                                                |
| Q92900 | (121)UPF1_Zn_bind(272)~(489)AAA_19(545)~(586)AAA_11(682)~(691)AAA_12(887)                                                                                                                                                                                                                                                                                     |
| Q8TD19 | (55)Pkinase(307)~(372)RCC1_2(393)~(403)RCC1(441)~(444)RCC1(495)~(500)RCC1(547)~(605)RCC1_2(628)~(616)RCC1(664)~(652)RCC1_2(680)                                                                                                                                                                                                                               |
| Q7Z4G4 | (190)UPF0020(320)                                                                                                                                                                                                                                                                                                                                             |
| Q86YT6 | (15)MIB_HERC2(71)~(79)ZZ(122)~(154)MIB_HERC2(218)~(451)Ank_5(504)~(522)Ank_2(593)~(564)Ank_4(616)~(594)Ank_2(663)~(651)Ank_5(705)~(752)Ank_5(779)~(817)zf-C3HC4_3(859)~(864)zf-C3HC4_3(906)~(960)zf-C3HC4_3(1001)                                                                                                                                             |
| Q5XX13 | (448)WD40(481)~(486)WD40(521)~(565)WD40(599)                                                                                                                                                                                                                                                                                                                  |
| O43809 | (36)NUDIX_2(222)                                                                                                                                                                                                                                                                                                                                              |
| P35789 | (5)KRAB(44)~(160)zf-H2C2_2(183)~(190)zf-H2C2_2(212)~(215)zf-H2C2_2(238)~(244)zf-H2C2_2(267)~(272)zf-H2C2_2(295)~(300)zf-H2C2_2(324)~(328)zf-H2C2_2(350)~(341)zf-C2H2(363)~(356)zf-H2C2_2(378)~(384)zf-H2C2_2(408)~(412)zf-H2C2_2(435)~(440)zf-H2C2_2(463)~(467)zf-H2C2_2(491)~(495)zf-H2C2_2(519)~(524)zf-H2C2_2(546)~(551)zf-H2C2_2(576)~(580)zf-H2C2_2(602) |
| Q00535 | (4)Pkinase(286)                                                                                                                                                                                                                                                                                                                                               |
| Q2TV78 | (30)PAN_1(108)~(118)Kringle(156)~(161)Kringle(238)~(253)Kringle(345)~(354)Kringle(390)~(437)Kringle(464)~(493)Trypsin(708)                                                                                                                                                                                                                                    |
| O75151 | (236)JmjC(336)                                                                                                                                                                                                                                                                                                                                                |
| Q5D0E6 | (403)DALR_1(542)                                                                                                                                                                                                                                                                                                                                              |
| Q9UKN8 | (64)TFIIIC_delta(254)                                                                                                                                                                                                                                                                                                                                         |
| Q86XN8 | (181)KH_1(240)~(275)KH_1(334)~(598)zf-C3HC4_3(645)                                                                                                                                                                                                                                                                                                            |
| Q86SG2 | (118)Ank_2(207)~(210)Ank_2(273)                                                                                                                                                                                                                                                                                                                               |
| Q9NW82 | (180)WD40(210)~(337)WD40(360)~(371)WD40(406)                                                                                                                                                                                                                                                                                                                  |
| Q9UJX4 | (254)ANAPC5(353)~(459)ANAPC5(491)                                                                                                                                                                                                                                                                                                                             |
| Q6ZNA4 | (18)RNF111_N(292)~(941)zf-RING_2(983)                                                                                                                                                                                                                                                                                                                         |

|        |                                                                                                                                                                                                                                                                                                                                                                                                                                                                                                                                                                                                                                                                                                                                     |
|--------|-------------------------------------------------------------------------------------------------------------------------------------------------------------------------------------------------------------------------------------------------------------------------------------------------------------------------------------------------------------------------------------------------------------------------------------------------------------------------------------------------------------------------------------------------------------------------------------------------------------------------------------------------------------------------------------------------------------------------------------|
| Q5VST9 | (10)I-set(99)~(110)I-set(201)~(245)I-set(327)~(335)I-set(405)~(425)I-set(489)~(515)fn3(599)~(615)I-set(676)~(732)I-set(779)~(808)I-set(872)~(898)I-set(964)~(990)I-set(1057)~(1082)I-set(1148)~(1174)I-set(1240)~(1266)I-set(1332)~(1358)I-set(1424)~(1450)I-set(1516)~(1541)I-set(1609)~(1634)I-set(1700)~(1726)I-set(1796)~(1811)I-set(1894)~(1900)I-set(1978)~(1990)I-set(2071)~(2081)I-set(2151)~(2167)I-set(2250)~(2293)I-set(2363)~(2471)I-set(2553)~(2560)I-set(2626)~(2659)Ig_2(2727)~(2838)ig(2909)~(2922)ig(2992)~(3013)ig(3077)~(3105)Ig_2(3180)~(3196)V-set(3261)~(3373)Ig_5(3447)~(3552)Ig_5(3622)~(4524)fn3(4606)~(5140)C2-set_2(5170)~(5270)BiPBP_C(5303)~(5697)RhoGEF(5870)~(6468)Pkinase(6721)~(7675)Pkinase(7924) |
| Q9Y383 | (6)LUC7(244)                                                                                                                                                                                                                                                                                                                                                                                                                                                                                                                                                                                                                                                                                                                        |
| Q6P9A3 | (27)KRAB(67)~(263)zf-H2C2_2(286)~(304)zf-C2H2(326)~(318)zf-H2C2_2(343)~(350)zf-H2C2_2(371)~(378)zf-H2C2_2(398)~(404)zf-H2C2_2(427)~(432)zf-H2C2_2(454)~(460)zf-H2C2_2(482)~(488)zf-H2C2_2(511)~(516)zf-H2C2_2(540)~(544)zf-H2C2_2(568)~(572)zf-H2C2_2(594)~(600)zf-H2C2_2(623)                                                                                                                                                                                                                                                                                                                                                                                                                                                      |
| Q8TAW3 | (49)KRAB(89)~(300)zf-H2C2_2(323)~(328)zf-H2C2_2(351)~(356)zf-H2C2_2(380)~(369)zf-C2H2(391)~(383)zf-H2C2_2(408)~(412)zf-H2C2_2(435)~(468)zf-H2C2_2(490)~(493)zf-H2C2_2(516)                                                                                                                                                                                                                                                                                                                                                                                                                                                                                                                                                          |
| Q9UBS0 | (67)Pkinase(328)                                                                                                                                                                                                                                                                                                                                                                                                                                                                                                                                                                                                                                                                                                                    |
| P61978 | (1)ROKNT(43)~(45)KH_1(103)~(147)KH_1(209)~(389)KH_1(451)                                                                                                                                                                                                                                                                                                                                                                                                                                                                                                                                                                                                                                                                            |
| Q69YN2 | (322)CwfJ_C_1(428)~(443)CwfJ_C_2(535)                                                                                                                                                                                                                                                                                                                                                                                                                                                                                                                                                                                                                                                                                               |
| Q8TEQ6 | (57)WD40(95)~(186)WD40(255)~(631)WD40(668)                                                                                                                                                                                                                                                                                                                                                                                                                                                                                                                                                                                                                                                                                          |
| Q9P0P0 | (75)zf-RING_2(117)                                                                                                                                                                                                                                                                                                                                                                                                                                                                                                                                                                                                                                                                                                                  |
| O15391 | (271)zf-H2C2_2(293)~(283)zf-C2H2(305)~(298)zf-H2C2_2(323)~(327)zf-H2C2_2(353)                                                                                                                                                                                                                                                                                                                                                                                                                                                                                                                                                                                                                                                       |
| Q9H7R5 | (128)zf-H2C2_2(151)~(155)zf-H2C2_2(179)~(184)zf-H2C2_2(206)~(225)zf-C2H2(247)~(239)zf-H2C2_2(263)~(267)zf-H2C2_2(292)~(296)zf-H2C2_2(319)~(323)zf-H2C2_2(347)~(351)zf-H2C2_2(375)~(379)zf-H2C2_2(403)~(407)zf-H2C2_2(431)~(436)zf-H2C2_2(459)~(477)zf-C2H2(499)~(492)zf-H2C2_2(515)~(519)zf-H2C2_2(543)~(547)zf-H2C2_2(571)~(576)zf-H2C2_2(599)                                                                                                                                                                                                                                                                                                                                                                                     |
| Q86TI4 | (8)WD40(43)~(47)WD40(83)~(87)WD40(123)~(129)WD40(178)~(183)WD40(221)~(225)WD40(260)~(306)WD40(341)                                                                                                                                                                                                                                                                                                                                                                                                                                                                                                                                                                                                                                  |
| Q9Y3A4 | (151)RRP7(280)                                                                                                                                                                                                                                                                                                                                                                                                                                                                                                                                                                                                                                                                                                                      |
| Q9NX07 | (5)RRM_1(73)~(98)RRM_1(161)                                                                                                                                                                                                                                                                                                                                                                                                                                                                                                                                                                                                                                                                                                         |
| Q9NWZ8 | (14)GEMIN8(242)                                                                                                                                                                                                                                                                                                                                                                                                                                                                                                                                                                                                                                                                                                                     |
| Q9UGC7 | (60)PCRF(221)~(229)RF-1(338)                                                                                                                                                                                                                                                                                                                                                                                                                                                                                                                                                                                                                                                                                                        |
| Q13434 | (82)Torus(117)~(123)Torus(151)~(245)zf-CCCH(268)~(393)Torus(432)~(435)MKRN1_C(485)                                                                                                                                                                                                                                                                                                                                                                                                                                                                                                                                                                                                                                                  |
| Q9BYW2 | (1561)SET(1666)~(2391)WW(2420)~(2468)SRI(2556)                                                                                                                                                                                                                                                                                                                                                                                                                                                                                                                                                                                                                                                                                      |
| Q13595 | (123)RRM_1(191)                                                                                                                                                                                                                                                                                                                                                                                                                                                                                                                                                                                                                                                                                                                     |
| Q16816 | (20)Pkinase(288)                                                                                                                                                                                                                                                                                                                                                                                                                                                                                                                                                                                                                                                                                                                    |
| Q8IY37 | (737)HA2(857)~(894)OB_NTP_bind(1011)                                                                                                                                                                                                                                                                                                                                                                                                                                                                                                                                                                                                                                                                                                |
| O94921 | (135)Pkinase(419)                                                                                                                                                                                                                                                                                                                                                                                                                                                                                                                                                                                                                                                                                                                   |
| Q969J2 | (49)SCAN(137)~(223)KRAB(260)~(335)zf-H2C2_2(357)~(362)zf-H2C2_2(387)~(390)zf-H2C2_2(414)~(418)zf-H2C2_2(442)~(502)zf-H2C2_2(526)                                                                                                                                                                                                                                                                                                                                                                                                                                                                                                                                                                                                    |
| P32969 | (12)Ribosomal_L6(85)~(99)Ribosomal_L6(178)                                                                                                                                                                                                                                                                                                                                                                                                                                                                                                                                                                                                                                                                                          |
| Q8N988 | (36)KRAB(76)~(159)zf-H2C2_2(183)~(188)zf-H2C2_2(212)~(216)zf-H2C2_2(240)~(246)zf-H2C2_2(268)~(273)zf-H2C2_2(296)~(313)zf-C2H2(335)~(327)zf-H2C2_2(352)~(355)zf-H2C2_2(379)~(385)zf-H2C2_2(408)                                                                                                                                                                                                                                                                                                                                                                                                                                                                                                                                      |
| Q9BWM5 | (28)KRAB(65)~(270)zf-C2H2(292)~(284)zf-H2C2_2(308)~(313)zf-H2C2_2(336)~(340)zf-H2C2_2(364)~(369)zf-H2C2_2(392)~(396)zf-H2C2_2(420)~(438)zf-C2H2(460)~(453)zf-H2C2_2(475)~(481)zf-H2C2_2(504)~(509)zf-H2C2_2(531)~(537)zf-H2C2_2(561)                                                                                                                                                                                                                                                                                                                                                                                                                                                                                                |
| Q8WW01 | (65)Sen15(164)                                                                                                                                                                                                                                                                                                                                                                                                                                                                                                                                                                                                                                                                                                                      |
| P49643 | (184)DNA_primase_lrg(448)                                                                                                                                                                                                                                                                                                                                                                                                                                                                                                                                                                                                                                                                                                           |

|        |                                                                                                                                                                                                                                                                                                                                                                                                   |
|--------|---------------------------------------------------------------------------------------------------------------------------------------------------------------------------------------------------------------------------------------------------------------------------------------------------------------------------------------------------------------------------------------------------|
| Q8TD17 | (143)KRAB(182)~(413)zf-H2C2_2(437)~(427)zf-C2H2(449)~(442)zf-H2C2_2(465)~(483)zf-C2H2(505)~(498)zf-H2C2_2(520)~(525)zf-H2C2_2(548)~(553)zf-H2C2_2(577)                                                                                                                                                                                                                                            |
| P61326 | (5)Mago_nashi(146)                                                                                                                                                                                                                                                                                                                                                                                |
| Q8IYB9 | (4)KRAB(44)~(160)zf-H2C2_2(183)~(186)zf-H2C2_2(210)~(214)zf-H2C2_2(238)~(243)zf-H2C2_2(267)~(271)zf-H2C2_2(293)~(299)zf-H2C2_2(322)~(326)zf-H2C2_2(350)~(340)zf-C2H2(362)~(368)zf-C2H2(390)~(382)zf-H2C2_2(406)~(410)zf-H2C2_2(434)~(442)zf-H2C2_2(463)~(467)zf-H2C2_2(489)~(494)zf-H2C2_2(518)~(508)zf-C2H2(530)~(536)zf-C2H2_6(560)~(550)zf-H2C2_2(573)~(579)zf-H2C2_2(601)~(606)zf-H2C2_2(630) |
| P01717 | (5)V-set(106)                                                                                                                                                                                                                                                                                                                                                                                     |
| Q8IVH8 | (16)Pkinase(273)~(567)CNH(863)                                                                                                                                                                                                                                                                                                                                                                    |
| Q9HC16 | (17)APOBEC_N(181)~(202)APOBEC_N(375)                                                                                                                                                                                                                                                                                                                                                              |
| Q6ZN04 | (68)KH_1(127)~(162)KH_1(221)~(516)zf-C3HC4_3(563)                                                                                                                                                                                                                                                                                                                                                 |
| Q6ZNH5 | (121)zf-H2C2_2(144)~(148)zf-H2C2_2(171)~(190)zf-C2H2(212)~(205)zf-H2C2_2(228)~(232)zf-H2C2_2(256)~(260)zf-H2C2_2(284)~(288)zf-H2C2_2(311)~(317)zf-H2C2_2(340)~(345)zf-H2C2_2(368)~(372)zf-H2C2_2(395)~(403)zf-H2C2_2(423)~(429)zf-H2C2_2(452)~(457)zf-H2C2_2(481)                                                                                                                                 |
| P51957 | (9)Pkinase(261)                                                                                                                                                                                                                                                                                                                                                                                   |
| Q9HC36 | (210)SpoU_methylase(400)                                                                                                                                                                                                                                                                                                                                                                          |
| Q2L4Q9 | (43)Trypsin(267)~(307)Trypsin(521)                                                                                                                                                                                                                                                                                                                                                                |
| P26196 | (121)DEAD(286)~(322)Helicase_C(429)                                                                                                                                                                                                                                                                                                                                                               |
| O75676 | (33)Pkinase(301)~(416)Pkinase(674)                                                                                                                                                                                                                                                                                                                                                                |
| Q06265 | (32)RNase_PH(163)~(189)RNase_PH_C(254)                                                                                                                                                                                                                                                                                                                                                            |
| Q8WY41 | (214)zf-nanos(266)                                                                                                                                                                                                                                                                                                                                                                                |
| O60907 | (57)LisH(83)~(226)WD40(260)~(277)WD40(315)~(284)eIF2A(389)~(404)WD40(440)~(445)WD40(491)~(496)WD40(533)                                                                                                                                                                                                                                                                                           |
| Q5TAP6 | (30)Utp14(733)                                                                                                                                                                                                                                                                                                                                                                                    |
| O94804 | (37)Pkinase(294)~(587)PKK(725)~(755)PKK(895)                                                                                                                                                                                                                                                                                                                                                      |
| Q8IZH2 | (1)XRN_N(227)                                                                                                                                                                                                                                                                                                                                                                                     |
| P01614 | (7)V-set(113)                                                                                                                                                                                                                                                                                                                                                                                     |
| Q7Z340 | (29)KRAB(69)~(266)zf-H2C2_2(289)~(296)zf-H2C2_2(316)~(335)zf-C2H2(357)~(349)zf-H2C2_2(373)~(363)zf-C2H2(385)~(405)zf-H2C2_2(429)~(435)zf-H2C2_2(457)~(461)zf-H2C2_2(486)~(492)zf-H2C2_2(514)~(503)zf-C2H2(525)~(546)zf-H2C2_2(569)~(574)zf-H2C2_2(597)~(602)zf-H2C2_2(626)~(630)zf-H2C2_2(654)                                                                                                    |
| P27144 | (10)ADK(189)                                                                                                                                                                                                                                                                                                                                                                                      |
| Q04726 | (1)TLE_N(133)~(480)WD40(513)~(610)WD40(646)                                                                                                                                                                                                                                                                                                                                                       |
| Q96MX3 | (126)zf-H2C2_2(149)~(194)zf-C2H2(214)~(206)zf-H2C2_2(229)~(289)zf-H2C2_2(313)~(317)zf-H2C2_2(341)~(347)zf-H2C2_2(369)~(451)zf-C2H2(473)~(465)zf-H2C2_2(489)~(557)zf-H2C2_2(580)                                                                                                                                                                                                                   |
| Q8N139 | (33)ABC2_membrane_3(416)~(497)ABC_tran(642)~(867)ABC2_membrane_3(1167)~(1304)ABC_tran(1440)                                                                                                                                                                                                                                                                                                       |
| P61570 | (19)HERV-K_REC(105)~(115)HERV-K_env_2(283)~(486)GP41(654)                                                                                                                                                                                                                                                                                                                                         |
| Q8IXM3 | (13)MRP-L27(127)                                                                                                                                                                                                                                                                                                                                                                                  |
| Q6P087 | (90)PseudoU_synth_2(251)                                                                                                                                                                                                                                                                                                                                                                          |
| Q5VV52 | (129)zf-H2C2_2(154)~(143)zf-C2H2(165)~(185)zf-H2C2_2(209)~(199)zf-C2H2(221)~(227)zf-C2H2(249)~(245)zf-H2C2_2(265)~(272)zf-H2C2_2(293)                                                                                                                                                                                                                                                             |
| P61579 | (19)HERV-K_REC(105)                                                                                                                                                                                                                                                                                                                                                                               |
| O60259 | (34)Trypsin(252)                                                                                                                                                                                                                                                                                                                                                                                  |
| Q9BXR5 | (72)LRR_8(129)~(372)LRR_8(433)~(444)LRR_8(498)~(636)TIR(780)                                                                                                                                                                                                                                                                                                                                      |
| Q9UGY1 | (20)Nop25(96)                                                                                                                                                                                                                                                                                                                                                                                     |

|        |                                                                                                                                                                                                                                                                                                                                                                                   |
|--------|-----------------------------------------------------------------------------------------------------------------------------------------------------------------------------------------------------------------------------------------------------------------------------------------------------------------------------------------------------------------------------------|
| Q6ZMS4 | (8)KRAB(48)~(159)zf-C2H2(181)~(177)zf-H2C2_2(197)~(204)zf-H2C2_2(226)~(230)zf-H2C2_2(253)~(261)zf-H2C2_2(282)~(285)zf-H2C2_2(308)~(314)zf-H2C2_2(338)~(343)zf-H2C2_2(365)~(370)zf-H2C2_2(392)~(399)zf-H2C2_2(421)~(428)zf-H2C2_2(450)~(453)zf-H2C2_2(477)                                                                                                                         |
| Q3KP44 | (56)Ank_5(101)~(102)Ank_2(192)~(154)Ank_5(202)~(266)Ank_4(317)                                                                                                                                                                                                                                                                                                                    |
| Q8NAV1 | (11)PRP38(174)                                                                                                                                                                                                                                                                                                                                                                    |
| P23396 | (20)KH_2(92)~(106)Ribosomal_S3_C(188)                                                                                                                                                                                                                                                                                                                                             |
| P08861 | (29)Trypsin(263)                                                                                                                                                                                                                                                                                                                                                                  |
| Q5JNZ3 | (64)KRAB(104)~(264)zf-H2C2_2(286)~(290)zf-H2C2_2(313)~(320)zf-H2C2_2(342)~(349)zf-H2C2_2(368)~(374)zf-H2C2_2(397)~(401)zf-H2C2_2(426)~(415)zf-C2H2(437)~(458)zf-H2C2_2(482)~(487)zf-H2C2_2(508)~(514)zf-H2C2_2(537)~(541)zf-H2C2_2(566)~(570)zf-H2C2_2(593)~(601)zf-H2C2_2(620)                                                                                                   |
| Q9Y5K2 | (31)Trypsin(247)                                                                                                                                                                                                                                                                                                                                                                  |
| A5A3E0 | (143)Ank_2(235)~(225)Ank_5(276)~(292)Ank_5(345)~(648)CCDC144C(701)~(703)Actin(1074)                                                                                                                                                                                                                                                                                               |
| Q9NWH9 | (23)SAP(56)~(386)RRM_1(455)                                                                                                                                                                                                                                                                                                                                                       |
| P01716 | (4)V-set(105)                                                                                                                                                                                                                                                                                                                                                                     |
| Q86WS5 | (78)Trypsin(313)                                                                                                                                                                                                                                                                                                                                                                  |
| O14775 | (96)WD40(133)~(227)WD40(267)~(271)WD40(309)~(362)WD40(394)                                                                                                                                                                                                                                                                                                                        |
| P19388 | (4)RNA_pol_Rpb5_N(94)~(137)RNA_pol_Rpb5_C(209)                                                                                                                                                                                                                                                                                                                                    |
| Q96SI9 | (87)DZF(333)~(395)dsrm(450)~(513)dsrm(574)                                                                                                                                                                                                                                                                                                                                        |
| P17020 | (205)zf-C2HE(220)~(230)zf-H2C2_2(247)~(257)zf-H2C2_2(274)~(280)zf-H2C2_2(303)~(293)zf-C2H2(315)~(307)zf-H2C2_2(331)~(321)zf-C2H2(343)~(335)zf-H2C2_2(359)~(363)zf-H2C2_2(387)~(391)zf-H2C2_2(415)~(419)zf-H2C2_2(443)~(448)zf-H2C2_2(472)~(476)zf-H2C2_2(500)~(517)zf-C2H2(539)~(532)zf-H2C2_2(555)~(545)zf-C2H2(567)~(588)zf-H2C2_2(611)~(616)zf-H2C2_2(639)~(645)zf-H2C2_2(667) |
| O94991 | (129)LRR_8(189)~(457)LRR_8(517)                                                                                                                                                                                                                                                                                                                                                   |
| Q5T8P6 | (534)RRM_6(600)~(906)RRM_5(957)                                                                                                                                                                                                                                                                                                                                                   |
| P01596 | (6)V-set(105)                                                                                                                                                                                                                                                                                                                                                                     |
| Q9UJW8 | (72)KRAB(111)~(353)zf-C2H2(375)~(367)zf-H2C2_2(392)~(395)zf-H2C2_2(419)~(424)zf-H2C2_2(447)~(454)zf-H2C2_2(474)~(482)zf-H2C2_2(503)~(508)zf-H2C2_2(531)~(536)zf-H2C2_2(559)~(563)zf-H2C2_2(587)~(592)zf-H2C2_2(615)~(620)zf-H2C2_2(643)~(650)zf-H2C2_2(671)~(661)zf-C2H2(683)                                                                                                     |
| Q9ULM2 | (58)KRAB(97)~(158)zf-C2H2_6(179)~(210)zf-H2C2_2(232)~(237)zf-H2C2_2(260)~(264)zf-H2C2_2(287)~(295)zf-H2C2_2(316)~(321)zf-H2C2_2(343)~(348)zf-H2C2_2(373)~(379)zf-H2C2_2(400)~(405)zf-H2C2_2(429)~(432)zf-H2C2_2(455)~(460)zf-H2C2_2(484)~(488)zf-H2C2_2(513)                                                                                                                      |
| P47974 | (1)Tis11B_N(139)~(154)zf-CCCH(180)~(192)zf-CCCH(216)                                                                                                                                                                                                                                                                                                                              |
| P01611 | (6)V-set(106)                                                                                                                                                                                                                                                                                                                                                                     |
| Q9NPI8 | (1)FANCF(354)                                                                                                                                                                                                                                                                                                                                                                     |
| Q9BR76 | (6)DUF1899(69)~(345)WD40_4(387)                                                                                                                                                                                                                                                                                                                                                   |
| P52736 | (2)KRAB(41)~(228)zf-H2C2_2(252)~(256)zf-H2C2_2(280)~(287)zf-H2C2_2(308)~(312)zf-H2C2_2(336)~(326)zf-C2H2(348)~(368)zf-H2C2_2(392)~(397)zf-H2C2_2(420)~(427)zf-H2C2_2(448)~(467)zf-C2H2(488)~(508)zf-H2C2_2(533)~(537)zf-H2C2_2(561)~(565)zf-H2C2_2(588)~(592)zf-H2C2_2(616)                                                                                                       |
| P00751 | (53)Sushi(84)~(103)Sushi(158)~(176)Sushi(218)~(270)VWA(467)~(483)Trypsin(742)                                                                                                                                                                                                                                                                                                     |
| Q15131 | (39)Pkinase(323)                                                                                                                                                                                                                                                                                                                                                                  |
| Q7Z5L7 | (97)LRR_8(132)~(136)LRR_8(159)~(191)LRR_8(234)~(238)LRR_8(300)~(310)LRR_8(345)~(334)LRR_4(372)~(380)LRR_8(442)~(451)LRR_8(513)~(523)LRR_8(582)                                                                                                                                                                                                                                    |
| Q07666 | (102)Qual(155)~(366)Sam68-YY(415)                                                                                                                                                                                                                                                                                                                                                 |
| Q99467 | (78)LRR_8(132)~(125)LRR_4(165)~(150)LRR_8(207)~(323)LRR_8(382)~(392)LRR_8(432)~(437)LRR_8(481)~(497)LRR_8(544)~(547)LRR_8(579)                                                                                                                                                                                                                                                    |

|        |                                                                                                                                                                                                                                                                                                                                                                                                                                                                                                                     |
|--------|---------------------------------------------------------------------------------------------------------------------------------------------------------------------------------------------------------------------------------------------------------------------------------------------------------------------------------------------------------------------------------------------------------------------------------------------------------------------------------------------------------------------|
| Q8N3J9 | (20)zf-H2C2_2(40)~(49)zf-H2C2_2(70)~(74)zf-H2C2_2(96)~(101)zf-H2C2_2(126)~(133)zf-H2C2_2(154)~(161)zf-H2C2_2(181)~(189)zf-H2C2_2(209)~(217)zf-H2C2_2(237)                                                                                                                                                                                                                                                                                                                                                           |
| Q9NVS2 | (79)Ribosomal_S18(128)                                                                                                                                                                                                                                                                                                                                                                                                                                                                                              |
| Q969X6 | (103)WD40(128)~(475)WD40(504)                                                                                                                                                                                                                                                                                                                                                                                                                                                                                       |
| Q8NHY2 | (469)WD40(499)~(506)WD40(542)~(590)WD40(626)~(632)WD40(667)                                                                                                                                                                                                                                                                                                                                                                                                                                                         |
| P34947 | (54)RGS(170)~(187)Pkinase(448)                                                                                                                                                                                                                                                                                                                                                                                                                                                                                      |
| Q9NX74 | (15)Dus(285)                                                                                                                                                                                                                                                                                                                                                                                                                                                                                                        |
| Q9BTD8 | (383)RRM_1(453)                                                                                                                                                                                                                                                                                                                                                                                                                                                                                                     |
| Q96AP0 | (97)TPP1(206)                                                                                                                                                                                                                                                                                                                                                                                                                                                                                                       |
| Q9NR56 | (17)zf-CCCH(39)~(59)zf-CCCH(72)~(183)zf-CCCH(205)~(220)zf-CCCH(240)                                                                                                                                                                                                                                                                                                                                                                                                                                                 |
| Q9BWT3 | (20)PAP_central(363)~(365)PAP_RNA-bind(429)                                                                                                                                                                                                                                                                                                                                                                                                                                                                         |
| Q99983 | (93)LRR_8(153)~(162)LRR_8(198)~(203)LRR_8(230)~(233)LRR_8(292)~(301)LRR_4(342)                                                                                                                                                                                                                                                                                                                                                                                                                                      |
| Q86UX6 | (93)Pkinase(345)                                                                                                                                                                                                                                                                                                                                                                                                                                                                                                    |
| Q9BVP2 | (16)GN3L_Grn1(88)~(256)MMR_HSR1(311)                                                                                                                                                                                                                                                                                                                                                                                                                                                                                |
| Q9BVS5 | (217)GCD14(467)                                                                                                                                                                                                                                                                                                                                                                                                                                                                                                     |
| Q9UI43 | (52)FtsJ(236)                                                                                                                                                                                                                                                                                                                                                                                                                                                                                                       |
| O95863 | (154)zf-C2H2_jaz(176)~(181)zf-C2H2(202)~(195)zf-H2C2_2(218)~(208)zf-C2H2(230)~(222)zf-H2C2_2(247)                                                                                                                                                                                                                                                                                                                                                                                                                   |
| Q13310 | (13)RRM_1(83)~(101)RRM_1(168)~(193)RRM_1(260)~(296)RRM_1(363)~(557)PABP(623)                                                                                                                                                                                                                                                                                                                                                                                                                                        |
| Q14966 | (679)RRM_6(744)~(1029)RRM_6(1071)                                                                                                                                                                                                                                                                                                                                                                                                                                                                                   |
| Q9BQ87 | (6)LisH(32)~(173)WD40(207)~(231)eIF2A(334)~(351)WD40(387)~(393)WD40(438)~(443)WD40(480)                                                                                                                                                                                                                                                                                                                                                                                                                             |
| Q9BYD1 | (18)Ribosomal_L13(139)                                                                                                                                                                                                                                                                                                                                                                                                                                                                                              |
| O94953 | (16)JmjN(50)~(176)JmjC(292)~(754)PHD_2(789)~(796)zf-HC5HC2H_2(906)                                                                                                                                                                                                                                                                                                                                                                                                                                                  |
| Q9Y4P3 | (86)WD40(118)~(187)WD40(216)~(274)WD40(307)                                                                                                                                                                                                                                                                                                                                                                                                                                                                         |
| P31942 | (19)RRM_1(86)~(197)RRM_6(264)                                                                                                                                                                                                                                                                                                                                                                                                                                                                                       |
| Q14587 | (82)KRAB(121)~(291)zf-H2C2_2(314)~(306)zf-C2H2(326)~(321)zf-H2C2_2(342)~(347)zf-H2C2_2(371)~(375)zf-H2C2_2(397)~(405)zf-H2C2_2(427)~(430)zf-H2C2_2(454)~(444)zf-C2H2(466)~(489)zf-H2C2_2(510)~(517)zf-H2C2_2(538)~(545)zf-H2C2_2(567)~(556)zf-C2H2(578)~(601)zf-H2C2_2(623)~(626)zf-H2C2_2(650)~(640)zf-C2H2(662)~(685)zf-H2C2_2(706)~(698)zf-C2H2(718)~(713)zf-H2C2_2(734)~(741)zf-H2C2_2(762)~(752)zf-C2H2(774)~(797)zf-H2C2_2(817)~(825)zf-H2C2_2(846)~(851)zf-H2C2_2(873)~(864)zf-C2H2(886)~(907)zf-H2C2_2(929) |
| P01597 | (6)V-set(105)                                                                                                                                                                                                                                                                                                                                                                                                                                                                                                       |
| P36954 | (14)RNA_POL_M_15KD(50)~(84)TFIIS_C(124)                                                                                                                                                                                                                                                                                                                                                                                                                                                                             |
| Q9NR20 | (104)Pkinase(400)                                                                                                                                                                                                                                                                                                                                                                                                                                                                                                   |
| Q99549 | (59)Chromo(108)~(573)Ank_2(663)~(653)Ank_5(707)                                                                                                                                                                                                                                                                                                                                                                                                                                                                     |
| P32298 | (53)RGS(171)~(189)Pkinase(449)                                                                                                                                                                                                                                                                                                                                                                                                                                                                                      |
| O76071 | (12)WD40(43)~(52)WD40(89)~(96)WD40(132)~(141)WD40(177)~(185)WD40(221)~(241)WD40(279)~(297)WD40(332)                                                                                                                                                                                                                                                                                                                                                                                                                 |
| P01607 | (6)V-set(106)                                                                                                                                                                                                                                                                                                                                                                                                                                                                                                       |
| P57052 | (12)RRM_1(80)                                                                                                                                                                                                                                                                                                                                                                                                                                                                                                       |
| O75312 | (49)zf-ZPR1(206)~(258)zf-ZPR1(415)                                                                                                                                                                                                                                                                                                                                                                                                                                                                                  |
| Q8N5N7 | (60)Ribosomal_L50(139)                                                                                                                                                                                                                                                                                                                                                                                                                                                                                              |
| O00472 | (12)ELL(291)~(532)Occludin_ELL(633)                                                                                                                                                                                                                                                                                                                                                                                                                                                                                 |
| Q9HA77 | (69)tRNA-synt_1e(364)                                                                                                                                                                                                                                                                                                                                                                                                                                                                                               |



|        |                                                                                                                                                                                                                                                                                                                                                                                                                                                                                                   |
|--------|---------------------------------------------------------------------------------------------------------------------------------------------------------------------------------------------------------------------------------------------------------------------------------------------------------------------------------------------------------------------------------------------------------------------------------------------------------------------------------------------------|
| Q9H6T3 | (131)TPR_11(197)~(202)TPR_1(234)~(281)TPR_11(346)~(351)TPR_1(383)~(546)RPAP3_C(636)                                                                                                                                                                                                                                                                                                                                                                                                               |
| Q96C10 | (1)ResIII(170)~(350)Helicase_C(473)~(552)RIG-I_C-RD(667)                                                                                                                                                                                                                                                                                                                                                                                                                                          |
| Q5JVG2 | (8)KRAB(48)~(348)zf-H2C2_2(363)~(370)zf-H2C2_2(395)~(399)zf-H2C2_2(421)~(429)zf-H2C2_2(449)~(440)zf-C2H2(462)~(482)zf-H2C2_2(506)~(510)zf-H2C2_2(534)~(539)zf-H2C2_2(561)~(567)zf-H2C2_2(589)~(597)zf-H2C2_2(618)~(626)zf-H2C2_2(646)~(650)zf-H2C2_2(675)~(664)zf-C2H2(686)~(709)zf-H2C2_2(729)~(720)zf-C2H2(742)~(734)zf-H2C2_2(757)~(765)zf-H2C2_2(786)~(776)zf-C2H2(798)                                                                                                                       |
| Q96B26 | (31)RNase_PH(166)~(192)RNase_PH_C(255)                                                                                                                                                                                                                                                                                                                                                                                                                                                            |
| Q8N157 | (646)WD40(682)~(700)WD40(726)~(848)WD40(871)~(1057)SH3_1(1103)                                                                                                                                                                                                                                                                                                                                                                                                                                    |
| Q8TCS8 | (54)RNase_PH(183)~(186)RNase_PH_C(250)~(367)RNase_PH(501)~(505)RNase_PH_C(579)                                                                                                                                                                                                                                                                                                                                                                                                                    |
| O95835 | (102)UBA(138)~(706)Pkinase(855)~(901)Pkinase(1010)                                                                                                                                                                                                                                                                                                                                                                                                                                                |
| P17038 | (4)KRAB(44)~(161)zf-H2C2_2(183)~(174)zf-C2H2(196)~(218)zf-H2C2_2(239)~(258)zf-C2H2(277)~(273)zf-H2C2_2(296)~(286)zf-C2H2(308)~(300)zf-H2C2_2(323)~(329)zf-H2C2_2(352)~(370)zf-C2H2(392)~(384)zf-H2C2_2(408)~(413)zf-H2C2_2(435)~(441)zf-H2C2_2(464)~(468)zf-H2C2_2(493)~(482)zf-C2H2(504)~(496)zf-H2C2_2(520)~(525)zf-H2C2_2(549)~(553)zf-H2C2_2(577)~(580)zf-H2C2_2(605)~(608)zf-H2C2_2(632)~(637)zf-H2C2_2(660)~(665)zf-H2C2_2(688)~(693)zf-H2C2_2(716)~(720)zf-H2C2_2(745)~(748)zf-H2C2_2(772) |
| Q59H18 | (71)Ank_2(164)~(134)Ank_4(187)~(204)Ank_2(291)~(309)Ank_2(402)~(463)Pkinase_Tyr(719)                                                                                                                                                                                                                                                                                                                                                                                                              |
| Q969F1 | (43)TFIIIC_sub6(76)                                                                                                                                                                                                                                                                                                                                                                                                                                                                               |
| Q86W11 | (44)SCAN(132)~(316)zf-H2C2_2(339)~(343)zf-H2C2_2(366)~(372)zf-H2C2_2(396)~(400)zf-H2C2_2(423)~(430)zf-H2C2_2(451)~(455)zf-H2C2_2(480)                                                                                                                                                                                                                                                                                                                                                             |
| Q8N9L1 | (143)zf-C2H2_4(162)~(191)zf-H2C2_2(216)~(220)zf-H2C2_2(247)~(264)zf-C2H2(288)                                                                                                                                                                                                                                                                                                                                                                                                                     |
| P01606 | (6)V-set(106)                                                                                                                                                                                                                                                                                                                                                                                                                                                                                     |
| Q15937 | (193)zf-C2H2(215)~(207)zf-H2C2_2(231)~(236)zf-H2C2_2(259)~(263)zf-H2C2_2(287)~(291)zf-H2C2_2(316)~(319)zf-H2C2_2(344)~(350)zf-H2C2_2(371)~(375)zf-H2C2_2(399)~(403)zf-H2C2_2(427)~(432)zf-H2C2_2(455)~(459)zf-H2C2_2(482)                                                                                                                                                                                                                                                                         |
| Q9Y3C7 | (16)Med31(108)                                                                                                                                                                                                                                                                                                                                                                                                                                                                                    |
| Q504Q3 | (517)UCH_1(898)~(975)RNase_T(1147)                                                                                                                                                                                                                                                                                                                                                                                                                                                                |
| Q8N1G2 | (88)G-patch(129)~(233)FtsJ(448)                                                                                                                                                                                                                                                                                                                                                                                                                                                                   |
| Q9H4D5 | (112)Tap-RNA_bind(192)~(345)NTF2(493)                                                                                                                                                                                                                                                                                                                                                                                                                                                             |
| Q9Y6G3 | (47)MRP-S32(142)                                                                                                                                                                                                                                                                                                                                                                                                                                                                                  |
| Q14232 | (16)IF-2B(293)                                                                                                                                                                                                                                                                                                                                                                                                                                                                                    |
| P62304 | (24)LSM(88)                                                                                                                                                                                                                                                                                                                                                                                                                                                                                       |
| Q9Y2S0 | (39)RNA_pol_L_2(112)                                                                                                                                                                                                                                                                                                                                                                                                                                                                              |
| P62910 | (17)Ribosomal_L32e(124)                                                                                                                                                                                                                                                                                                                                                                                                                                                                           |
| Q96D53 | (197)ABC1(312)                                                                                                                                                                                                                                                                                                                                                                                                                                                                                    |
| Q5HYK9 | (15)KRAB(54)~(145)zf-C2H2(166)~(158)zf-H2C2_2(182)~(200)zf-C2H2(222)~(254)zf-C2H2(275)~(330)zf-C2H2(352)~(345)zf-H2C2_2(368)~(358)zf-C2H2(380)~(401)zf-H2C2_2(425)~(429)zf-H2C2_2(453)~(460)zf-H2C2_2(482)~(485)zf-H2C2_2(509)~(513)zf-H2C2_2(537)~(544)zf-H2C2_2(566)~(570)zf-H2C2_2(593)                                                                                                                                                                                                        |
| O94901 | (62)MRP(318)~(676)Sad1_UNC(809)                                                                                                                                                                                                                                                                                                                                                                                                                                                                   |
| P40197 | (76)LRR_8(134)~(99)LRR_8(158)~(137)LRR_5(268)~(195)LRR_8(254)~(267)LRR_8(321)~(364)LRR_8(421)                                                                                                                                                                                                                                                                                                                                                                                                     |
| P15621 | (52)KRAB(92)~(217)zf-C2H2(236)~(260)zf-H2C2_2(282)~(288)zf-H2C2_2(310)~(316)zf-H2C2_2(339)~(343)zf-H2C2_2(366)~(372)zf-H2C2_2(394)~(401)zf-H2C2_2(420)~(428)zf-H2C2_2(451)~(456)zf-H2C2_2(480)~(469)zf-C2H2(491)~(511)zf-H2C2_2(535)~(541)zf-H2C2_2(563)~(567)zf-H2C2_2(589)~(595)zf-H2C2_2(619)~(624)zf-H2C2_2(647)                                                                                                                                                                              |
| O43684 | (16)WD40(43)~(94)WD40(124)~(221)WD40(262)                                                                                                                                                                                                                                                                                                                                                                                                                                                         |
| P01603 | (6)V-set(104)                                                                                                                                                                                                                                                                                                                                                                                                                                                                                     |

|        |                                                                                                                                                                                                                                                                                                                                                                                                                                                                 |
|--------|-----------------------------------------------------------------------------------------------------------------------------------------------------------------------------------------------------------------------------------------------------------------------------------------------------------------------------------------------------------------------------------------------------------------------------------------------------------------|
| P31629 | (204)zf-H2C2_2(228)~(1814)zf-H2C2_2(1838)                                                                                                                                                                                                                                                                                                                                                                                                                       |
| Q92626 | (86)LRR_8(146)~(246)I-set(328)~(342)I-set(429)~(433)I-set(519)~(525)I-set(611)~(741)An_peroxidase(1289)                                                                                                                                                                                                                                                                                                                                                         |
| O60346 | (638)LRR_8(703)~(714)LRR_8(771)~(738)LRR_8(793)~(787)LRR_8(843)~(896)LRR_8(952)~(963)LRR_8(998)~(1014)LRR_8(1072)~(1107)LRR_4(1140)~(1177)PP2C(1415)                                                                                                                                                                                                                                                                                                            |
| O00148 | (69)DEAD(234)~(274)Helicase_C(381)                                                                                                                                                                                                                                                                                                                                                                                                                              |
| Q06730 | (12)KRAB(52)~(328)zf-C2H2(350)~(342)zf-H2C2_2(366)~(370)zf-H2C2_2(395)~(398)zf-H2C2_2(421)~(426)zf-H2C2_2(449)~(454)zf-H2C2_2(478)~(482)zf-H2C2_2(507)~(511)zf-H2C2_2(533)~(538)zf-H2C2_2(563)~(567)zf-H2C2_2(591)~(595)zf-H2C2_2(618)~(623)zf-H2C2_2(645)~(651)zf-H2C2_2(673)~(682)zf-H2C2_2(703)~(721)zf-C2H2(742)~(735)zf-H2C2_2(758)                                                                                                                        |
| Q9H1A7 | (31)RNA_pol_L_2(102)                                                                                                                                                                                                                                                                                                                                                                                                                                            |
| P80422 | (5)V-set(110)                                                                                                                                                                                                                                                                                                                                                                                                                                                   |
| O00566 | (21)Mpp10(654)                                                                                                                                                                                                                                                                                                                                                                                                                                                  |
| Q9Y3D5 | (70)Ribosomal_S18(120)                                                                                                                                                                                                                                                                                                                                                                                                                                          |
| Q32P44 | (216)HELP(284)~(298)WD40(343)~(594)WD40(625)~(832)WD40(867)                                                                                                                                                                                                                                                                                                                                                                                                     |
| Q96N38 | (131)zf-H2C2_2(153)~(172)zf-C2H2(194)~(187)zf-H2C2_2(211)~(215)zf-H2C2_2(239)~(242)zf-H2C2_2(267)~(270)zf-H2C2_2(294)~(299)zf-H2C2_2(321)~(327)zf-H2C2_2(350)~(354)zf-H2C2_2(379)~(383)zf-H2C2_2(406)~(410)zf-H2C2_2(434)~(438)zf-H2C2_2(462)~(466)zf-H2C2_2(490)                                                                                                                                                                                               |
| Q6UXH9 | (128)CUB(233)~(280)Sushi(342)~(402)Sushi(442)~(457)Trypsin(715)                                                                                                                                                                                                                                                                                                                                                                                                 |
| Q8NCB2 | (34)Pkinase(286)                                                                                                                                                                                                                                                                                                                                                                                                                                                |
| Q8NC42 | (109)PA(172)~(268)zf-RING_2(310)                                                                                                                                                                                                                                                                                                                                                                                                                                |
| Q9HBT8 | (45)KRAB(80)~(258)zf-H2C2_2(282)~(271)zf-C2H2(293)~(313)zf-H2C2_2(336)~(340)zf-H2C2_2(364)~(369)zf-H2C2_2(393)~(396)zf-H2C2_2(420)~(424)zf-H2C2_2(449)~(452)zf-H2C2_2(476)~(481)zf-H2C2_2(504)                                                                                                                                                                                                                                                                  |
| O15514 | (32)RNA_pol_Rpb4(136)                                                                                                                                                                                                                                                                                                                                                                                                                                           |
| Q00534 | (13)Pkinase(300)                                                                                                                                                                                                                                                                                                                                                                                                                                                |
| P78563 | (79)dsrm(140)~(244)dsrm(294)~(370)A_deamin(731)                                                                                                                                                                                                                                                                                                                                                                                                                 |
| O75648 | (6)tRNA_Me_trans(383)                                                                                                                                                                                                                                                                                                                                                                                                                                           |
| Q92945 | (146)KH_1(208)~(236)KH_1(299)~(327)KH_1(386)~(427)KH_1(491)~(611)DUF1897(632)~(639)DUF1897(655)~(667)DUF1897(685)                                                                                                                                                                                                                                                                                                                                               |
| P01699 | (6)V-set(110)                                                                                                                                                                                                                                                                                                                                                                                                                                                   |
| Q5QP82 | (202)WD40(238)~(246)WD40(281)                                                                                                                                                                                                                                                                                                                                                                                                                                   |
| Q86UE3 | (61)KRAB(100)~(217)zf-C2H2(239)~(234)zf-H2C2_2(254)~(259)zf-H2C2_2(282)~(287)zf-H2C2_2(312)~(315)zf-H2C2_2(338)~(344)zf-H2C2_2(366)~(373)zf-H2C2_2(396)~(400)zf-H2C2_2(423)~(428)zf-H2C2_2(450)~(456)zf-H2C2_2(478)~(484)zf-H2C2_2(508)~(511)zf-H2C2_2(534)~(540)zf-H2C2_2(563)~(581)zf-C2H2(603)~(595)zf-H2C2_2(618)~(624)zf-H2C2_2(646)~(651)zf-H2C2_2(676)~(665)zf-C2H2(687)~(708)zf-H2C2_2(732)~(735)zf-H2C2_2(758)~(764)zf-H2C2_2(787)~(792)zf-H2C2_2(814) |
| O75909 | (36)Cyclin_N(155)                                                                                                                                                                                                                                                                                                                                                                                                                                               |
| Q9H672 | (19)Ank_2(105)~(112)Ank_2(180)~(212)Ank_5(251)                                                                                                                                                                                                                                                                                                                                                                                                                  |
| Q9H6F5 | (237)Cgr1(338)                                                                                                                                                                                                                                                                                                                                                                                                                                                  |
| Q9UIV1 | (17)CAF1(132)~(149)CAF1(238)                                                                                                                                                                                                                                                                                                                                                                                                                                    |
| P62891 | (9)Ribosomal_L39(49)                                                                                                                                                                                                                                                                                                                                                                                                                                            |
| O60602 | (49)LRR_8(78)~(85)LRR_8(128)~(135)LRR_8(182)~(317)LRR_8(372)~(428)LRR_8(485)~(491)LRR_8(538)~(549)LRR_8(580)~(692)TIR(856)                                                                                                                                                                                                                                                                                                                                      |
| Q676U5 | (16)ATG16(206)~(316)WD40(349)~(401)WD40(436)~(447)WD40(475)~(537)WD40(562)                                                                                                                                                                                                                                                                                                                                                                                      |
| Q9NZI8 | (4)RRM_6(58)~(85)RRM_1(150)~(198)KH_1(260)~(280)KH_1(343)~(409)KH_1(470)~(490)KH_1(553)                                                                                                                                                                                                                                                                                                                                                                         |
| P35030 | (81)Trypsin(296)                                                                                                                                                                                                                                                                                                                                                                                                                                                |

|        |                                                                                                                                                                                                                                                                                                                                                                                                                                     |
|--------|-------------------------------------------------------------------------------------------------------------------------------------------------------------------------------------------------------------------------------------------------------------------------------------------------------------------------------------------------------------------------------------------------------------------------------------|
| P39019 | (5)Ribosomal_S19e(139)                                                                                                                                                                                                                                                                                                                                                                                                              |
| Q9NVW2 | (569)zf-RING_2(611)                                                                                                                                                                                                                                                                                                                                                                                                                 |
| Q96J92 | (179)Pkinase(432)~(453)OSR1_C(489)~(703)OSR1_C(716)                                                                                                                                                                                                                                                                                                                                                                                 |
| P38159 | (10)RRM_1(80)~(173)RBM1CTR(217)                                                                                                                                                                                                                                                                                                                                                                                                     |
| Q969L4 | (20)LSM(83)                                                                                                                                                                                                                                                                                                                                                                                                                         |
| Q15046 | (127)tRNA_anti-codon(206)~(222)tRNA-synt_2(573)                                                                                                                                                                                                                                                                                                                                                                                     |
| Q96S94 | (71)Cyclin_N(191)~(212)Cyclin_N(282)                                                                                                                                                                                                                                                                                                                                                                                                |
| Q07002 | (142)Pkinase(423)                                                                                                                                                                                                                                                                                                                                                                                                                   |
| O76094 | (34)SRP_TPR_like(156)~(180)TPR_12(256)~(351)TPR_19(405)~(412)TPR_12(477)~(532)SRP72(588)                                                                                                                                                                                                                                                                                                                                            |
| P04432 | (28)V-set(126)                                                                                                                                                                                                                                                                                                                                                                                                                      |
| Q7Z3Z3 | (296)PAZ(427)~(579)Piwi(868)                                                                                                                                                                                                                                                                                                                                                                                                        |
| Q08AN1 | (7)KRAB(47)~(185)zf-C2H2(207)~(200)zf-H2C2_2(223)~(241)zf-C2H2(263)~(256)zf-H2C2_2(279)~(283)zf-H2C2_2(307)~(325)zf-C2H2(347)~(367)zf-H2C2_2(391)~(381)zf-C2H2(403)~(396)zf-H2C2_2(419)~(424)zf-H2C2_2(447)~(452)zf-H2C2_2(475)~(480)zf-H2C2_2(503)~(508)zf-H2C2_2(531)~(536)zf-H2C2_2(559)~(564)zf-H2C2_2(587)~(592)zf-H2C2_2(615)~(620)zf-H2C2_2(643)~(661)zf-C2H2(683)~(689)zf-C2H2(711)~(703)zf-H2C2_2(727)~(731)zf-H2C2_2(754) |
| Q8WU08 | (23)Pkinase(280)                                                                                                                                                                                                                                                                                                                                                                                                                    |
| Q86T29 | (7)KRAB(45)~(184)zf-H2C2_2(207)~(197)zf-C2H2(219)~(243)zf-H2C2_2(264)~(268)zf-H2C2_2(291)~(298)zf-H2C2_2(318)~(339)zf-C2H2(359)~(352)zf-H2C2_2(374)~(380)zf-H2C2_2(402)~(408)zf-H2C2_2(430)~(436)zf-H2C2_2(460)~(464)zf-H2C2_2(487)~(495)zf-H2C2_2(515)~(520)zf-H2C2_2(543)~(533)zf-C2H2(555)~(578)zf-H2C2_2(600)~(589)zf-C2H2(611)~(619)zf-C2H2(639)                                                                               |
| Q8TB72 | (727)PUF(760)~(763)PUF(791)~(799)PUF(827)~(837)PUF(864)~(873)PUF(906)~(909)PUF(941)~(944)PUF(973)~(992)PUF(1021)                                                                                                                                                                                                                                                                                                                    |
| P50750 | (19)Pkinase(315)                                                                                                                                                                                                                                                                                                                                                                                                                    |
| A8MTY0 | (4)KRAB(44)~(170)zf-C2H2(192)~(213)zf-H2C2_2(236)~(226)zf-C2H2(248)~(268)zf-H2C2_2(292)~(310)zf-C2H2(332)~(324)zf-H2C2_2(348)~(353)zf-H2C2_2(376)~(381)zf-H2C2_2(405)~(408)zf-H2C2_2(432)~(437)zf-H2C2_2(461)~(464)zf-H2C2_2(487)~(492)zf-H2C2_2(516)~(521)zf-H2C2_2(544)~(548)zf-H2C2_2(571)~(577)zf-H2C2_2(600)                                                                                                                   |
| Q9NSD9 | (118)B3_4(279)~(309)B5(374)                                                                                                                                                                                                                                                                                                                                                                                                         |
| P17039 | (14)KRAB(54)~(149)zf-C2H2(170)~(163)zf-H2C2_2(185)~(191)zf-H2C2_2(212)~(219)zf-H2C2_2(241)~(247)zf-H2C2_2(271)~(275)zf-H2C2_2(299)~(303)zf-H2C2_2(326)~(331)zf-H2C2_2(353)~(374)zf-C2H2(394)~(387)zf-H2C2_2(411)~(415)zf-H2C2_2(437)~(443)zf-H2C2_2(465)~(470)zf-H2C2_2(495)~(499)zf-H2C2_2(523)~(527)zf-H2C2_2(550)~(558)zf-H2C2_2(577)~(583)zf-H2C2_2(606)                                                                        |
| P35858 | (78)LRR_8(134)~(123)LRR_8(182)~(146)LRR_8(206)~(195)LRR_8(254)~(219)LRR_8(277)~(292)LRR_8(350)~(339)LRR_8(395)~(387)LRR_8(446)~(436)LRR_8(494)~(508)LRR_4(536)                                                                                                                                                                                                                                                                      |
| P41252 | (17)tRNA-synt_1(638)~(693)Anticodon_1(848)                                                                                                                                                                                                                                                                                                                                                                                          |
| Q6P158 | (243)RWD(418)~(551)DEAD(705)~(835)Helicase_C(968)~(1039)HA2(1124)~(1164)OB_NTP_bind(1310)                                                                                                                                                                                                                                                                                                                                           |
| P09661 | (1)LRR_9(175)                                                                                                                                                                                                                                                                                                                                                                                                                       |
| Q6P1R4 | (21)Dus(289)                                                                                                                                                                                                                                                                                                                                                                                                                        |
| Q9Y3S1 | (200)Pkinase(453)~(474)OSR1_C(511)                                                                                                                                                                                                                                                                                                                                                                                                  |
| Q96T58 | (8)RRM_1(69)~(339)RRM_1(406)~(440)RRM_1(507)~(535)RRM_5(587)~(3509)SPOC(3630)                                                                                                                                                                                                                                                                                                                                                       |
| Q6IN84 | (51)SpoU_sub_bind(128)~(146)SpoU_methylase(301)                                                                                                                                                                                                                                                                                                                                                                                     |
| Q9Y5S2 | (76)Pkinase(342)~(527)KELK(606)~(878)DMPK_coil(939)~(1026)C1_1(1076)~(1247)CNH(1509)                                                                                                                                                                                                                                                                                                                                                |
| Q6S545 | (180)Ank_2(272)~(262)Ank_5(313)~(329)Ank_5(382)                                                                                                                                                                                                                                                                                                                                                                                     |
| O60304 | (46)SCAN(133)~(325)zf-C2H2(347)~(339)zf-H2C2_2(363)~(367)zf-H2C2_2(391)~(395)zf-                                                                                                                                                                                                                                                                                                                                                    |

|        |                                                                                                                                                                                                                                                                                                                                   |
|--------|-----------------------------------------------------------------------------------------------------------------------------------------------------------------------------------------------------------------------------------------------------------------------------------------------------------------------------------|
|        | H2C2_2(420)~(424)zf-H2C2_2(447)                                                                                                                                                                                                                                                                                                   |
| P54646 | (17)Pkinase(268)~(401)AdenylateSensor(479)                                                                                                                                                                                                                                                                                        |
| P62249 | (14)Ribosomal_S9(146)                                                                                                                                                                                                                                                                                                             |
| Q8TC59 | (391)PAZ(523)~(668)Piwi(956)                                                                                                                                                                                                                                                                                                      |
| P54253 | (574)AXH(686)                                                                                                                                                                                                                                                                                                                     |
| Q09028 | (19)CAF1C_H4-bd(88)~(173)WD40(206)~(221)WD40(256)~(264)WD40(302)~(310)WD40(346)~(370)WD40(402)                                                                                                                                                                                                                                    |
| Q9NZU0 | (61)LRR_4(98)~(105)LRR_8(139)~(142)LRR_8(171)~(176)LRR_8(237)~(247)LRR_8(306)                                                                                                                                                                                                                                                     |
| Q8IVP9 | (11)KRAB(51)~(171)zf-H2C2_2(190)~(199)zf-H2C2_2(222)~(226)zf-H2C2_2(249)~(257)zf-H2C2_2(278)~(282)zf-H2C2_2(305)~(311)zf-H2C2_2(334)~(340)zf-H2C2_2(363)~(379)zf-C2H2(400)                                                                                                                                                        |
| Q99698 | (3020)PH_BEACH(3114)~(3134)Beach(3422)                                                                                                                                                                                                                                                                                            |
| A0M8Q6 | (14)C1-set(95)                                                                                                                                                                                                                                                                                                                    |
| Q9NXH9 | (57)TRM(500)                                                                                                                                                                                                                                                                                                                      |
| Q96NI8 | (14)KRAB(54)~(232)zf-H2C2_2(256)~(260)zf-H2C2_2(284)~(288)zf-H2C2_2(312)~(317)zf-H2C2_2(341)~(347)zf-H2C2_2(368)~(373)zf-H2C2_2(396)~(400)zf-H2C2_2(424)~(429)zf-H2C2_2(453)~(456)zf-H2C2_2(481)~(485)zf-H2C2_2(508)                                                                                                              |
| P04434 | (26)V-set(111)                                                                                                                                                                                                                                                                                                                    |
| Q7L985 | (82)LRR_8(141)~(250)LRR_8(307)~(415)I-set(500)                                                                                                                                                                                                                                                                                    |
| P62269 | (14)Ribosomal_S13(142)                                                                                                                                                                                                                                                                                                            |
| Q10570 | (92)MMS1_N(670)~(1074)CPSF_A(1408)                                                                                                                                                                                                                                                                                                |
| P13639 | (18)GTP_EFTU(359)~(410)GTP_EFTU_D2(485)~(503)EFG_II(565)~(621)EFG_IV(737)~(739)EFG_C(826)                                                                                                                                                                                                                                         |
| P01620 | (6)V-set(107)                                                                                                                                                                                                                                                                                                                     |
| Q92793 | (354)zf-TAZ(430)~(588)KIX(667)~(1104)Bromodomain(1178)~(1192)DUF902(1231)~(1342)HAT_KAT11(1640)~(1702)ZZ(1742)~(1772)zf-TAZ(1843)~(2019)Creb_binding(2113)                                                                                                                                                                        |
| Q96MR9 | (13)KRAB(53)~(110)KRAB(150)~(348)zf-C2H2(370)~(362)zf-H2C2_2(386)~(391)zf-H2C2_2(415)~(431)zf-C2H2_6(454)~(488)zf-C2H2_6(511)~(503)zf-H2C2_2(526)~(531)zf-H2C2_2(554)~(559)zf-H2C2_2(582)~(587)zf-H2C2_2(610)~(614)zf-H2C2_2(638)~(643)zf-H2C2_2(666)~(656)zf-C2H2(678)~(712)zf-C2H2(734)~(726)zf-H2C2_2(751)~(758)zf-H2C2_2(778) |
| P31146 | (5)DUF1899(68)~(78)WD40(109)~(122)WD40(160)~(174)WD40(202)~(345)WD40_4(387)~(410)Trimer_CC(461)                                                                                                                                                                                                                                   |
| P50151 | (9)G-gamma(67)                                                                                                                                                                                                                                                                                                                    |
| Q9H5J8 | (27)TAF1D(243)                                                                                                                                                                                                                                                                                                                    |
| Q9NPI6 | (9)DCP1(122)~(541)mRNA_decap_C(580)                                                                                                                                                                                                                                                                                               |
| Q8WXE0 | (51)Ank_4(102)~(86)Ank_2(170)~(174)Ank_2(251)~(491)SAM_1(549)~(561)SAM_1(619)~(794)Caskin-Pro-rich(881)~(1145)Caskin-tail(1202)                                                                                                                                                                                                   |
| Q8NHQ9 | (33)DEAD(212)~(253)Helicase_C(363)~(405)DUF4217(463)                                                                                                                                                                                                                                                                              |
| Q6DT37 | (71)Pkinase(337)~(542)DMPK_coil(572)~(744)DMPK_coil(800)~(1098)CNH(1360)                                                                                                                                                                                                                                                          |
| Q9BRT6 | (3)Laps(119)                                                                                                                                                                                                                                                                                                                      |
| Q86US8 | (639)EST1(742)~(751)EST1_DNA_bind(1105)~(1248)PIN_4(1408)                                                                                                                                                                                                                                                                         |
| Q9Y577 | (16)zf-C3HC4_4(65)~(350)SPRY(467)                                                                                                                                                                                                                                                                                                 |
| Q5VIY5 | (8)KRAB(48)~(230)zf-H2C2_2(253)~(258)zf-H2C2_2(282)~(288)zf-H2C2_2(310)~(313)zf-H2C2_2(338)~(342)zf-H2C2_2(365)~(370)zf-H2C2_2(394)~(383)zf-C2H2(405)~(425)zf-H2C2_2(448)~(453)zf-H2C2_2(477)~(483)zf-H2C2_2(505)                                                                                                                 |
| Q9UI30 | (2)Trm112p(112)                                                                                                                                                                                                                                                                                                                   |
| Q8N3D4 | (13)NT-C2(161)~(1039)CH(1137)~(1360)DUF3585(1499)                                                                                                                                                                                                                                                                                 |

|        |                                                                                                                                                                                                                                                                                                                                                                                                                                        |
|--------|----------------------------------------------------------------------------------------------------------------------------------------------------------------------------------------------------------------------------------------------------------------------------------------------------------------------------------------------------------------------------------------------------------------------------------------|
| Q9Y243 | (7)PH(105)~(150)Pkinase(405)~(426)Pkinase_C(475)                                                                                                                                                                                                                                                                                                                                                                                       |
| Q96KQ7 | (656)Ank_2(741)~(752)Ank_4(805)~(821)Ank_2(881)~(927)Pre-SET(1030)~(1049)SET(1155)                                                                                                                                                                                                                                                                                                                                                     |
| Q52M93 | (27)KRAB(67)~(146)zf-H2C2_2(168)~(176)zf-H2C2_2(195)~(201)zf-H2C2_2(223)~(228)zf-H2C2_2(253)~(242)zf-C2H2(264)~(287)zf-H2C2_2(307)~(298)zf-C2H2(320)~(371)zf-H2C2_2(392)~(382)zf-C2H2(404)~(425)zf-H2C2_2(449)~(456)zf-H2C2_2(477)~(466)zf-C2H2(488)~(509)zf-H2C2_2(533)~(536)zf-H2C2_2(560)~(567)zf-H2C2_2(587)~(595)zf-H2C2_2(617)~(634)zf-C2H2(656)~(648)zf-H2C2_2(672)~(679)zf-H2C2_2(700)~(705)zf-H2C2_2(729)~(732)zf-H2C2_2(756) |
| P82650 | (68)MRP-S22(309)                                                                                                                                                                                                                                                                                                                                                                                                                       |
| Q9GZR2 | (245)RNase_T(394)                                                                                                                                                                                                                                                                                                                                                                                                                      |
| Q92989 | (15)CLP1_N(107)~(121)CLP1_P(307)~(313)Clp1(423)                                                                                                                                                                                                                                                                                                                                                                                        |
| Q9P1W8 | (37)V-set(127)~(158)C1-set(234)~(262)C1-set(335)                                                                                                                                                                                                                                                                                                                                                                                       |
| O94769 | (103)VWC(157)~(343)LRR_8(405)~(415)LRR_8(476)~(487)LRR_8(547)~(609)LRR_8(648)                                                                                                                                                                                                                                                                                                                                                          |
| O75054 | (28)V-set(132)~(152)V-set(252)~(294)V-set(387)~(424)V-set(513)~(559)V-set(657)~(686)V-set(793)~(823)V-set(931)~(960)ig(1084)                                                                                                                                                                                                                                                                                                           |
| Q9UEE5 | (65)Pkinase(321)                                                                                                                                                                                                                                                                                                                                                                                                                       |
| P01771 | (12)V-set(119)                                                                                                                                                                                                                                                                                                                                                                                                                         |
| Q68DY9 | (27)KRAB(67)~(158)zf-H2C2_2(181)~(280)zf-H2C2_2(305)~(322)zf-C2H2(344)~(365)zf-H2C2_2(389)~(395)zf-H2C2_2(416)~(421)zf-H2C2_2(445)~(449)zf-H2C2_2(472)                                                                                                                                                                                                                                                                                 |
| Q8IY84 | (74)Pkinase(325)                                                                                                                                                                                                                                                                                                                                                                                                                       |
| Q96KR1 | (332)zf-met(355)~(383)zf-met(406)~(582)zf-met(606)~(790)DZF(1036)                                                                                                                                                                                                                                                                                                                                                                      |
| Q9P016 | (56)EVE(218)                                                                                                                                                                                                                                                                                                                                                                                                                           |
| Q9BYN8 | (28)MRP-S26(196)                                                                                                                                                                                                                                                                                                                                                                                                                       |
| P23443 | (91)Pkinase(352)                                                                                                                                                                                                                                                                                                                                                                                                                       |
| O95758 | (76)RRM_5(131)~(184)RRM_1(247)~(378)RRM_5(430)~(477)RRM_6(536)                                                                                                                                                                                                                                                                                                                                                                         |
| Q9P2S6 | (2)MORN(22)~(25)MORN(46)~(70)MORN(91)~(267)Ank_2(321)~(525)Ank_2(613)~(657)Ank_2(723)                                                                                                                                                                                                                                                                                                                                                  |
| Q96EL3 | (20)MRP_L53(71)                                                                                                                                                                                                                                                                                                                                                                                                                        |
| P06331 | (32)V-set(144)                                                                                                                                                                                                                                                                                                                                                                                                                         |
| Q6ZS81 | (2540)Beach(2821)                                                                                                                                                                                                                                                                                                                                                                                                                      |
| Q9HAV4 | (110)Xpo1(271)                                                                                                                                                                                                                                                                                                                                                                                                                         |
| P16989 | (93)CSD(159)                                                                                                                                                                                                                                                                                                                                                                                                                           |
| Q9UQ07 | (4)Pkinase(285)                                                                                                                                                                                                                                                                                                                                                                                                                        |
| Q9H9L3 | (180)RNase_T(335)                                                                                                                                                                                                                                                                                                                                                                                                                      |
| Q8WXD9 | (32)Ank_2(110)~(118)Ank_4(168)~(172)Ank_2(251)~(373)Caskin1-CID(421)~(472)SAM_1(532)~(547)SAM_1(602)~(876)Caskin-Pro-rich(961)~(1370)Caskin-tail(1431)                                                                                                                                                                                                                                                                                 |
| Q9UEW8 | (63)Pkinase(337)~(452)OSR1_C(482)                                                                                                                                                                                                                                                                                                                                                                                                      |
| Q9H8H0 | (200)NUC205(243)                                                                                                                                                                                                                                                                                                                                                                                                                       |
| Q9NWX5 | (88)Ank_5(144)~(138)Ank_2(206)~(237)Ank_4(281)~(372)SOCS_box(410)                                                                                                                                                                                                                                                                                                                                                                      |
| P17021 | (9)KRAB(48)~(207)zf-H2C2_2(228)~(233)zf-H2C2_2(256)~(261)zf-H2C2_2(284)~(288)zf-H2C2_2(313)~(317)zf-H2C2_2(339)~(345)zf-H2C2_2(367)~(375)zf-H2C2_2(396)~(401)zf-H2C2_2(423)~(431)zf-H2C2_2(452)~(457)zf-H2C2_2(480)~(485)zf-H2C2_2(507)~(513)zf-H2C2_2(537)~(554)zf-C2H2(576)~(599)zf-H2C2_2(620)~(625)zf-H2C2_2(648)                                                                                                                  |
| Q8IYT8 | (9)Pkinase(271)~(864)DUF3543(1029)                                                                                                                                                                                                                                                                                                                                                                                                     |
| Q07955 | (18)RRM_1(85)~(123)RRM_1(184)                                                                                                                                                                                                                                                                                                                                                                                                          |
| Q6ZMT4 | (269)JmjC(369)                                                                                                                                                                                                                                                                                                                                                                                                                         |

|        |                                                                                                                                                                                                                                                                                                                                                                                                           |
|--------|-----------------------------------------------------------------------------------------------------------------------------------------------------------------------------------------------------------------------------------------------------------------------------------------------------------------------------------------------------------------------------------------------------------|
| Q9Y6K5 | (54)NTP_transf_2(97)~(161)OAS1_C(341)~(454)NTP_transf_2(494)~(560)OAS1_C(744)~(780)NTP_transf_2(869)~(904)OAS1_C(1084)                                                                                                                                                                                                                                                                                    |
| Q9NR96 | (64)LRR_8(97)~(114)LRR_8(138)~(143)LRR_8(177)~(200)LRR_8(254)~(289)LRR_8(344)~(393)LRR_8(429)~(476)LRR_8(510)~(511)LRR_8(555)~(572)LRR_8(610)~(622)LRR_8(665)~(702)LRR_8(762)                                                                                                                                                                                                                             |
| Q8WWZ7 | (31)ABC2_membrane_3(416)~(497)ABC_tran(643)~(866)ABC2_membrane_3(1224)~(1318)ABC_tran(1460)                                                                                                                                                                                                                                                                                                               |
| Q9UL52 | (52)SEA(151)~(192)Trypsin(417)                                                                                                                                                                                                                                                                                                                                                                            |
| Q9BV68 | (228)zf-RING_2(270)                                                                                                                                                                                                                                                                                                                                                                                       |
| Q9Y283 | (48)Ank_4(101)~(85)Ank_2(176)~(133)Ank_5(189)~(181)Ank_2(247)~(255)Ank_2(311)~(326)Ank_2(420)~(423)Ank_4(475)~(460)Ank_2(548)                                                                                                                                                                                                                                                                             |
| P01595 | (6)V-set(106)                                                                                                                                                                                                                                                                                                                                                                                             |
| Q86UE8 | (465)Pkinase(741)                                                                                                                                                                                                                                                                                                                                                                                         |
| Q9GZX7 | (11)APOBEC_N(177)                                                                                                                                                                                                                                                                                                                                                                                         |
| O95391 | (162)Slu7(434)                                                                                                                                                                                                                                                                                                                                                                                            |
| Q9ULV4 | (4)DUF1899(67)~(343)WD40_4(385)                                                                                                                                                                                                                                                                                                                                                                           |
| O94967 | (659)WD40(687)~(746)WD40(782)~(795)WD40(828)~(834)WD40(868)                                                                                                                                                                                                                                                                                                                                               |
| Q3MHD2 | (81)AD(165)                                                                                                                                                                                                                                                                                                                                                                                               |
| Q9H9A6 | (84)LRR_8(140)~(151)LRR_8(209)~(267)LRR_8(324)~(453)LRR_8(507)~(519)LRR_8(576)                                                                                                                                                                                                                                                                                                                            |
| Q9C0J8 | (194)WD40(230)~(238)WD40(266)~(278)WD40(316)~(322)WD40(359)~(374)WD40(402)                                                                                                                                                                                                                                                                                                                                |
| P01781 | (12)V-set(114)                                                                                                                                                                                                                                                                                                                                                                                            |
| O00411 | (429)RPOL_N(704)~(831)RNA_pol(1230)                                                                                                                                                                                                                                                                                                                                                                       |
| Q8TDP1 | (28)RNase_H2_suC(157)                                                                                                                                                                                                                                                                                                                                                                                     |
| P46781 | (108)S4(151)                                                                                                                                                                                                                                                                                                                                                                                              |
| P52737 | (4)KRAB(44)~(155)zf-H2C2_2(177)~(184)zf-H2C2_2(206)~(211)zf-H2C2_2(234)~(239)zf-H2C2_2(262)~(267)zf-H2C2_2(290)~(295)zf-H2C2_2(319)~(322)zf-H2C2_2(346)~(352)zf-H2C2_2(374)~(379)zf-H2C2_2(402)~(408)zf-H2C2_2(430)~(436)zf-H2C2_2(459)~(463)zf-H2C2_2(486)~(491)zf-H2C2_2(514)                                                                                                                           |
| P80748 | (4)V-set(107)                                                                                                                                                                                                                                                                                                                                                                                             |
| P01705 | (5)V-set(110)                                                                                                                                                                                                                                                                                                                                                                                             |
| O43310 | (379)MIF4G(576)                                                                                                                                                                                                                                                                                                                                                                                           |
| Q9BS34 | (4)KRAB(44)~(96)zf-H2C2_2(112)~(119)zf-H2C2_2(138)~(141)zf-C2H2(163)~(197)zf-C2H2(219)~(212)zf-H2C2_2(235)~(239)zf-H2C2_2(264)~(271)zf-H2C2_2(290)~(296)zf-H2C2_2(320)~(339)zf-C2H2(359)~(351)zf-H2C2_2(375)                                                                                                                                                                                              |
| Q6ZR52 | (41)zf-H2C2_2(63)~(82)zf-C2H2(104)~(97)zf-H2C2_2(119)~(123)zf-H2C2_2(147)~(152)zf-H2C2_2(175)~(181)zf-H2C2_2(203)~(235)zf-H2C2_2(259)~(264)zf-H2C2_2(287)~(291)zf-H2C2_2(315)~(320)zf-H2C2_2(344)~(348)zf-H2C2_2(371)~(376)zf-H2C2_2(400)~(404)zf-H2C2_2(427)~(431)zf-H2C2_2(455)~(460)zf-H2C2_2(483)~(488)zf-H2C2_2(512)~(519)zf-H2C2_2(539)~(544)zf-H2C2_2(568)~(571)zf-H2C2_2(596)~(599)zf-H2C2_2(623) |
| Q9H171 | (15)z-alpha(59)~(106)z-alpha(149)                                                                                                                                                                                                                                                                                                                                                                         |
| Q8NF86 | (37)Trypsin(274)                                                                                                                                                                                                                                                                                                                                                                                          |
| A9UHW6 | (7)MIF4G(202)                                                                                                                                                                                                                                                                                                                                                                                             |
| Q03923 | (4)KRAB(44)~(161)zf-H2C2_2(183)~(189)zf-H2C2_2(211)~(217)zf-H2C2_2(240)~(244)zf-H2C2_2(268)~(273)zf-H2C2_2(296)~(301)zf-H2C2_2(325)~(328)zf-H2C2_2(352)~(356)zf-H2C2_2(381)~(384)zf-H2C2_2(409)~(413)zf-H2C2_2(436)~(441)zf-H2C2_2(464)~(468)zf-H2C2_2(492)~(497)zf-H2C2_2(520)~(525)zf-H2C2_2(548)~(552)zf-H2C2_2(576)                                                                                   |
| Q9Y388 | (38)RRM_1(108)                                                                                                                                                                                                                                                                                                                                                                                            |
| Q9BV38 | (112)WD40(149)~(166)WD40(201)~(263)WD40(297)~(383)WD40_alt(430)                                                                                                                                                                                                                                                                                                                                           |
| P37108 | (4)SRP14(94)                                                                                                                                                                                                                                                                                                                                                                                              |

|        |                                                                                                                                                                                                                                                                                  |
|--------|----------------------------------------------------------------------------------------------------------------------------------------------------------------------------------------------------------------------------------------------------------------------------------|
| P62487 | (11)SHS2_Rpb7-N(77)~(79)S1(158)                                                                                                                                                                                                                                                  |
| P29374 | (171)RBB1NT(262)~(311)ARID(397)~(575)Tudor-knot(629)                                                                                                                                                                                                                             |
| P01765 | (12)V-set(113)                                                                                                                                                                                                                                                                   |
| P57078 | (26)Pkinase(277)~(461)Ank_2(549)~(551)Ank_2(613)~(620)Ank_4(672)~(682)Ank_2(747)~(751)Ank_2(812)                                                                                                                                                                                 |
| O43414 | (147)RNase_T(319)                                                                                                                                                                                                                                                                |
| P0CG06 | (14)C1-set(95)                                                                                                                                                                                                                                                                   |
| Q86VH5 | (71)LRR_5(184)~(158)LRR_8(217)~(181)LRR_8(241)~(230)LRR_8(290)                                                                                                                                                                                                                   |
| P0CB38 | (12)RRM_1(82)~(100)RRM_1(166)~(192)RRM_1(259)~(295)RRM_1(362)                                                                                                                                                                                                                    |
| Q9UK33 | (92)zf-C2H2_4(114)~(120)zf-C2H2(142)~(150)zf-C2H2(172)                                                                                                                                                                                                                           |
| Q92993 | (9)Tudor-knot(65)~(288)MOZ_SAS(471)                                                                                                                                                                                                                                              |
| P36896 | (33)Activin_recp(104)~(178)TGF_beta_GS(205)~(210)Pkinase(491)                                                                                                                                                                                                                    |
| Q15542 | (205)TFIID_NTD2(337)~(473)WD40(498)~(535)WD40(571)~(576)WD40(612)~(618)WD40(655)~(659)WD40(697)~(704)WD40(739)                                                                                                                                                                   |
| P01834 | (12)C1-set(97)                                                                                                                                                                                                                                                                   |
| O14965 | (134)Pkinase(383)                                                                                                                                                                                                                                                                |
| Q9UJA5 | (20)Gcd10p(253)                                                                                                                                                                                                                                                                  |
| Q92985 | (14)IRF(124)~(289)IRF-3(464)                                                                                                                                                                                                                                                     |
| Q96N22 | (5)KRAB(44)~(198)zf-C2H2(220)~(214)zf-H2C2_2(236)~(271)zf-H2C2_2(292)~(324)zf-H2C2_2(348)~(352)zf-H2C2_2(376)~(380)zf-H2C2_2(404)~(408)zf-H2C2_2(431)~(436)zf-H2C2_2(460)~(464)zf-H2C2_2(488)~(493)zf-H2C2_2(516)~(521)zf-H2C2_2(545)~(549)zf-H2C2_2(572)~(576)zf-H2C2_2(600)    |
| Q9UL18 | (26)ArgoN(164)~(174)ArgoL1(224)~(235)PAZ(363)~(373)ArgoL2(418)~(427)ArgoMid(508)~(515)Piwi(815)                                                                                                                                                                                  |
| Q9Y337 | (67)Trypsin(285)                                                                                                                                                                                                                                                                 |
| P61626 | (19)Lys(146)                                                                                                                                                                                                                                                                     |
| Q86VK4 | (235)zf-H2C2_2(261)~(249)zf-C2H2(273)~(266)zf-H2C2_2(292)~(295)zf-H2C2_2(321)~(325)zf-H2C2_2(349)                                                                                                                                                                                |
| A6NFI3 | (158)KRAB(198)~(346)zf-C2H2(367)~(387)zf-H2C2_2(412)~(415)zf-H2C2_2(439)~(444)zf-H2C2_2(467)~(471)zf-H2C2_2(494)~(705)zf-H2C2_2(730)~(733)zf-H2C2_2(757)~(761)zf-H2C2_2(785)~(789)zf-H2C2_2(813)~(817)zf-H2C2_2(842)~(846)zf-H2C2_2(869)~(873)zf-H2C2_2(897)~(902)zf-H2C2_2(925) |
| P62750 | (17)Ribosomal_L23eN(67)~(76)Ribosomal_L23(140)                                                                                                                                                                                                                                   |
| Q9Y3I0 | (65)RtcB(505)                                                                                                                                                                                                                                                                    |
| Q8IYD8 | (106)ResIII(248)~(473)Helicase_C(580)~(675)FANCM-MHF_bd(790)                                                                                                                                                                                                                     |
| P01817 | (7)V-set(123)                                                                                                                                                                                                                                                                    |
| Q86SG6 | (4)Pkinase(256)~(393)RCC1_2(422)~(414)RCC1(458)~(464)RCC1(509)~(569)RCC1_2(592)~(579)RCC1(628)~(633)RCC1(679)                                                                                                                                                                    |
| Q6NX45 | (153)zf-C2H2(173)~(166)zf-H2C2_2(190)~(193)zf-H2C2_2(217)~(222)zf-H2C2_2(245)~(250)zf-H2C2_2(274)~(291)zf-C2H2(313)~(306)zf-H2C2_2(328)~(334)zf-H2C2_2(357)~(361)zf-H2C2_2(385)~(390)zf-H2C2_2(413)~(403)zf-C2H2(425)~(420)zf-H2C2_2(441)~(446)zf-H2C2_2(469)                    |
| Q6PI48 | (167)tRNA-synt_2(606)                                                                                                                                                                                                                                                            |
| Q32MK0 | (518)Pkinase(770)                                                                                                                                                                                                                                                                |
| Q9BRH9 | (15)KRAB(55)~(209)zf-C2H2(231)~(223)zf-H2C2_2(248)~(251)zf-H2C2_2(274)~(279)zf-H2C2_2(304)~(310)zf-H2C2_2(331)~(336)zf-H2C2_2(360)~(364)zf-H2C2_2(387)~(395)zf-H2C2_2(414)~(419)zf-H2C2_2(443)~(448)zf-H2C2_2(471)~(476)zf-H2C2_2(500)~(594)zf-C2H2(616)                         |
| P62308 | (8)LSM(71)                                                                                                                                                                                                                                                                       |
| Q9NPE3 | (3)Nop10p(52)                                                                                                                                                                                                                                                                    |
| P26651 | (104)zf-CCCH(129)~(142)zf-CCCH(168)                                                                                                                                                                                                                                              |

|        |                                                                                                                                                                                                                                                                                                                                                                                                                                                                                                                                                    |
|--------|----------------------------------------------------------------------------------------------------------------------------------------------------------------------------------------------------------------------------------------------------------------------------------------------------------------------------------------------------------------------------------------------------------------------------------------------------------------------------------------------------------------------------------------------------|
| P31483 | (9)RRM_1(77)~(108)RRM_1(178)~(216)RRM_1(280)                                                                                                                                                                                                                                                                                                                                                                                                                                                                                                       |
| P01625 | (6)V-set(112)                                                                                                                                                                                                                                                                                                                                                                                                                                                                                                                                      |
| Q14653 | (7)IRF(109)~(202)IRF-3(379)                                                                                                                                                                                                                                                                                                                                                                                                                                                                                                                        |
| Q9BYX4 | (8)CARD_2(98)~(111)CARD_2(200)~(306)ResIII(491)~(712)Helicase_C(824)~(904)RIG-I_C-RD(1017)                                                                                                                                                                                                                                                                                                                                                                                                                                                         |
| P62312 | (10)LSM(74)                                                                                                                                                                                                                                                                                                                                                                                                                                                                                                                                        |
| O43781 | (209)Pkinase(522)                                                                                                                                                                                                                                                                                                                                                                                                                                                                                                                                  |
| P20749 | (136)Ank_4(180)~(163)Ank_5(208)~(187)Ank_2(272)~(242)Ank_4(296)~(295)Ank_5(349)                                                                                                                                                                                                                                                                                                                                                                                                                                                                    |
| Q9NQ39 | (3)S10_plectin(94)                                                                                                                                                                                                                                                                                                                                                                                                                                                                                                                                 |
| Q08ER8 | (9)KRAB(49)~(214)zf-H2C2_2(237)~(241)zf-H2C2_2(265)~(269)zf-H2C2_2(294)~(301)zf-H2C2_2(320)~(328)zf-H2C2_2(349)~(354)zf-H2C2_2(376)~(382)zf-H2C2_2(405)~(409)zf-H2C2_2(434)~(441)zf-H2C2_2(461)~(466)zf-H2C2_2(489)~(493)zf-H2C2_2(516)~(521)zf-H2C2_2(545)                                                                                                                                                                                                                                                                                        |
| P0CG47 | (6)ubiquitin(74)~(82)ubiquitin(150)~(158)ubiquitin(226)                                                                                                                                                                                                                                                                                                                                                                                                                                                                                            |
| Q9BXN1 | (105)LRR_8(162)~(112)LRR_5(217)~(241)LRR_8(301)                                                                                                                                                                                                                                                                                                                                                                                                                                                                                                    |
| Q9UBU9 | (116)Tap-RNA_bind(198)~(387)NTF2(535)~(569)TAP_C(617)                                                                                                                                                                                                                                                                                                                                                                                                                                                                                              |
| Q8TF20 | (96)zf-C2H2_6(116)~(139)zf-H2C2_2(163)~(195)zf-H2C2_2(218)~(223)zf-H2C2_2(245)~(252)zf-H2C2_2(274)~(280)zf-H2C2_2(303)~(307)zf-H2C2_2(331)~(335)zf-H2C2_2(359)~(363)zf-H2C2_2(387)~(377)zf-C2H2(399)~(419)zf-H2C2_2(443)~(447)zf-H2C2_2(469)~(476)zf-H2C2_2(500)~(504)zf-H2C2_2(527)~(532)zf-H2C2_2(555)~(559)zf-H2C2_2(583)~(587)zf-H2C2_2(611)~(621)zf-H2C2_2(639)~(643)zf-H2C2_2(666)~(671)zf-H2C2_2(696)~(685)zf-C2H2(707)~(741)zf-C2H2(763)~(755)zf-H2C2_2(777)~(784)zf-H2C2_2(808)~(812)zf-H2C2_2(835)~(840)zf-H2C2_2(863)~(881)zf-C2H2(903) |
| O60235 | (49)SEA(148)~(187)Trypsin(412)                                                                                                                                                                                                                                                                                                                                                                                                                                                                                                                     |
| Q15269 | (370)WD40(401)~(407)WD40(442)~(492)WD40(529)~(771)Utp12(874)                                                                                                                                                                                                                                                                                                                                                                                                                                                                                       |
| Q8N9H8 | (390)DNA_pol_A_exo1(568)~(631)Mut7-C(733)~(828)Mut7-C(850)                                                                                                                                                                                                                                                                                                                                                                                                                                                                                         |
| P40337 | (61)VHL(205)                                                                                                                                                                                                                                                                                                                                                                                                                                                                                                                                       |
| Q9BQ39 | (161)DEAD(335)~(388)Helicase_C(483)~(571)GUCT(665)                                                                                                                                                                                                                                                                                                                                                                                                                                                                                                 |
| P29083 | (16)TFIIE_alpha(123)~(127)TF_Zn_Ribbon(175)~(354)TFIIE-A_C(439)                                                                                                                                                                                                                                                                                                                                                                                                                                                                                    |
| Q8IYB7 | (371)RNB(719)                                                                                                                                                                                                                                                                                                                                                                                                                                                                                                                                      |
| Q12926 | (41)RRM_1(111)~(127)RRM_1(193)~(278)RRM_1(347)                                                                                                                                                                                                                                                                                                                                                                                                                                                                                                     |
| P01710 | (6)V-set(110)                                                                                                                                                                                                                                                                                                                                                                                                                                                                                                                                      |
| Q9GZS3 | (17)eIF2A(130)~(139)eIF2A(258)~(180)WD40(218)~(225)WD40(260)~(265)WD40(302)                                                                                                                                                                                                                                                                                                                                                                                                                                                                        |
| Q13409 | (133)Dynein_IC2(163)                                                                                                                                                                                                                                                                                                                                                                                                                                                                                                                               |
| Q14526 | (37)BTB(152)~(437)zf-C2H2_jaz(456)~(507)zf-C2H2_jaz(529)~(535)zf-C2H2(557)~(578)zf-H2C2_2(601)                                                                                                                                                                                                                                                                                                                                                                                                                                                     |
| Q9UPZ9 | (4)Pkinase(284)                                                                                                                                                                                                                                                                                                                                                                                                                                                                                                                                    |
| P10266 | (76)RVT_1(245)~(252)RVT_thumb(316)~(462)RNase_H(588)~(592)Integrase_Zn(629)~(646)rve(755)~(875)HERV-K_env_2(1014)                                                                                                                                                                                                                                                                                                                                                                                                                                  |
| Q9H3S3 | (117)SRCR_2(212)~(218)Trypsin(448)                                                                                                                                                                                                                                                                                                                                                                                                                                                                                                                 |
| P06888 | (5)V-set(107)                                                                                                                                                                                                                                                                                                                                                                                                                                                                                                                                      |
| P01742 | (8)V-set(108)                                                                                                                                                                                                                                                                                                                                                                                                                                                                                                                                      |
| Q9Y6M1 | (5)RRM_1(62)~(86)RRM_1(148)~(196)KH_1(258)~(278)KH_1(340)~(432)KH_1(492)~(513)KH_1(575)                                                                                                                                                                                                                                                                                                                                                                                                                                                            |
| Q9H6Y2 | (289)WD40(323)                                                                                                                                                                                                                                                                                                                                                                                                                                                                                                                                     |
| O75526 | (10)RRM_1(80)~(173)RBM1CTR(217)                                                                                                                                                                                                                                                                                                                                                                                                                                                                                                                    |
| P16415 | (4)KRAB(42)~(164)zf-C2H2_6(188)~(178)zf-H2C2_2(202)~(210)zf-H2C2_2(229)~(235)zf-H2C2_2(257)~(263)zf-H2C2_2(286)~(293)zf-H2C2_2(315)~(319)zf-H2C2_2(342)~(348)zf-H2C2_2(368)~(375)zf-H2C2_2(398)~(403)zf-H2C2_2(426)~(430)zf-H2C2_2(453)~(458)zf-H2C2_2(481)~(486)zf-H2C2_2(510)~(513)zf-H2C2_2(537)~(542)zf-                                                                                                                                                                                                                                       |



|        |                                                                                                                                                                                                                                                                                                                                                                                                                                                  |
|--------|--------------------------------------------------------------------------------------------------------------------------------------------------------------------------------------------------------------------------------------------------------------------------------------------------------------------------------------------------------------------------------------------------------------------------------------------------|
|        | H2C2_2(566)~(570)zf-H2C2_2(591)                                                                                                                                                                                                                                                                                                                                                                                                                  |
| Q8N136 | (85)WD40(120)~(124)WD40(163)~(167)WD40(205)~(209)WD40(247)~(253)WD40(289)~(293)WD40(330)~(336)WD40(373)~(377)WD40(414)                                                                                                                                                                                                                                                                                                                           |
| Q9Y2G7 | (6)KRAB(45)~(150)zf-H2C2_2(167)~(173)zf-H2C2_2(196)~(200)zf-H2C2_2(224)~(228)zf-H2C2_2(251)~(257)zf-H2C2_2(280)~(270)zf-C2H2(290)~(313)zf-H2C2_2(335)~(341)zf-H2C2_2(365)~(368)zf-H2C2_2(392)~(399)zf-H2C2_2(419)~(425)zf-H2C2_2(447)~(453)zf-H2C2_2(475)~(481)zf-H2C2_2(504)                                                                                                                                                                    |
| Q6ZN57 | (102)zf-C2H2(124)~(116)zf-H2C2_2(139)~(144)zf-H2C2_2(168)~(172)zf-H2C2_2(196)~(201)zf-H2C2_2(225)~(228)zf-H2C2_2(252)~(257)zf-H2C2_2(280)~(285)zf-H2C2_2(308)~(313)zf-H2C2_2(336)~(340)zf-H2C2_2(364)~(368)zf-H2C2_2(392)~(397)zf-H2C2_2(419)~(424)zf-H2C2_2(449)                                                                                                                                                                                |
| Q8NCK3 | (11)KRAB(51)~(130)zf-C2H2(152)~(147)zf-H2C2_2(167)~(158)zf-C2H2(180)~(203)zf-H2C2_2(224)~(229)zf-H2C2_2(252)~(256)zf-H2C2_2(279)~(287)zf-H2C2_2(308)~(315)zf-H2C2_2(336)~(344)zf-H2C2_2(364)~(369)zf-H2C2_2(393)~(397)zf-H2C2_2(419)                                                                                                                                                                                                             |
| Q9NR90 | (42)RRM_1(98)                                                                                                                                                                                                                                                                                                                                                                                                                                    |
| Q13976 | (10)PKcGMP_CC(44)~(122)cNMP_binding(203)~(240)cNMP_binding(325)~(361)Pkinase(619)                                                                                                                                                                                                                                                                                                                                                                |
| Q8TF66 | (67)LRR_5(197)~(149)LRR_8(209)~(198)LRR_8(257)~(293)LRR_8(353)~(366)LRR_8(423)                                                                                                                                                                                                                                                                                                                                                                   |
| Q86U42 | (174)RRM_1(243)                                                                                                                                                                                                                                                                                                                                                                                                                                  |
| P42766 | (8)Ribosomal_L29(63)                                                                                                                                                                                                                                                                                                                                                                                                                             |
| Q8WV37 | (27)KRAB(67)~(217)zf-H2C2_2(242)~(245)zf-H2C2_2(270)~(273)zf-H2C2_2(298)~(287)zf-C2H2(309)~(302)zf-H2C2_2(326)~(330)zf-H2C2_2(353)~(358)zf-H2C2_2(380)~(399)zf-C2H2(421)~(413)zf-H2C2_2(437)~(442)zf-H2C2_2(466)~(469)zf-H2C2_2(493)~(497)zf-H2C2_2(522)                                                                                                                                                                                         |
| P0CG24 | (27)zf-H2C2_2(52)~(55)zf-H2C2_2(79)~(83)zf-H2C2_2(108)~(111)zf-H2C2_2(136)~(139)zf-H2C2_2(164)~(153)zf-C2H2(175)~(196)zf-H2C2_2(220)~(226)zf-H2C2_2(247)~(251)zf-H2C2_2(276)~(265)zf-C2H2(287)~(308)zf-H2C2_2(331)~(335)zf-H2C2_2(358)                                                                                                                                                                                                           |
| Q9ULC4 | (94)PUA(170)                                                                                                                                                                                                                                                                                                                                                                                                                                     |
| Q8NDG6 | (384)Helicase_C(500)~(568)HA2(664)~(904)TUDOR(1013)                                                                                                                                                                                                                                                                                                                                                                                              |
| P07585 | (54)LRRNT(80)~(84)LRR_8(141)~(151)LRR_8(212)~(221)LRR_8(281)                                                                                                                                                                                                                                                                                                                                                                                     |
| Q96IC2 | (508)RRM_1(571)~(626)RRM_1(664)                                                                                                                                                                                                                                                                                                                                                                                                                  |
| Q3ZCT1 | (14)zf-H2C2_2(37)~(41)zf-H2C2_2(65)~(69)zf-H2C2_2(93)~(83)zf-C2H2(105)~(125)zf-H2C2_2(145)~(151)zf-H2C2_2(174)~(179)zf-H2C2_2(202)~(206)zf-H2C2_2(229)~(235)zf-H2C2_2(258)~(262)zf-H2C2_2(285)~(291)zf-H2C2_2(315)~(319)zf-H2C2_2(341)~(346)zf-H2C2_2(370)~(377)zf-H2C2_2(398)                                                                                                                                                                   |
| O43719 | (135)RRM_1(212)~(289)RRM_1(342)                                                                                                                                                                                                                                                                                                                                                                                                                  |
| O15042 | (276)RRM_1(348)~(429)Surp(479)                                                                                                                                                                                                                                                                                                                                                                                                                   |
| P09132 | (17)SRP19(114)                                                                                                                                                                                                                                                                                                                                                                                                                                   |
| Q6ZVH7 | (41)Ank_2(132)~(141)Ank_2(225)~(237)Ank_2(301)                                                                                                                                                                                                                                                                                                                                                                                                   |
| Q6UXK5 | (94)LRR_5(201)~(120)LRR_8(179)~(216)LRR_8(275)~(312)LRR_8(373)~(431)I-set(516)                                                                                                                                                                                                                                                                                                                                                                   |
| Q86TM3 | (52)KH_1(109)~(246)DEAD(416)~(459)Helicase_C(562)                                                                                                                                                                                                                                                                                                                                                                                                |
| P62495 | (18)eRF1_1(138)~(145)eRF1_2(276)~(280)eRF1_3(417)                                                                                                                                                                                                                                                                                                                                                                                                |
| P36508 | (181)zf-H2C2_2(208)~(212)zf-H2C2_2(238)~(241)zf-H2C2_2(268)~(274)zf-H2C2_2(298)~(301)zf-H2C2_2(327)~(345)zf-C2H2(368)                                                                                                                                                                                                                                                                                                                            |
| O43660 | (196)WD40(232)~(237)WD40(274)~(279)WD40(316)~(322)WD40(358)~(404)WD40(440)                                                                                                                                                                                                                                                                                                                                                                       |
| O94813 | (27)LRRNT(54)~(56)LRR_8(115)~(154)LRR_8(211)~(234)LRRCT(258)~(273)LRRNT(299)~(302)LRR_8(360)~(373)LRR_8(431)~(455)LRRCT(479)~(505)LRRNT(532)~(553)LRR_5(663)~(584)LRR_8(637)~(607)LRR_8(665)~(688)LRRCT(713)~(727)LRRNT(753)~(775)LRR_5(858)~(802)LRR_8(861)~(884)LRRCT(907)~(922)EGF(952)~(961)EGF(994)~(1002)EGF(1031)~(1040)EGF(1072)~(1080)EGF(1109)~(1125)EGF(1154)~(1188)Laminin_G_1(1318)~(1336)EGF(1364)~(1375)EGF(1403)~(1421)EGF(1445) |
| Q9BYK8 | (541)AAA_11(620)~(635)AAA_11(705)~(713)AAA_12(915)~(1334)RNB(1691)~(2152)A                                                                                                                                                                                                                                                                                                                                                                       |

|         |                                                                                                                                                                                                                                                                                                                                                       |
|---------|-------------------------------------------------------------------------------------------------------------------------------------------------------------------------------------------------------------------------------------------------------------------------------------------------------------------------------------------------------|
|         | AA_11(2398)~(2406)AAA_12(2611)                                                                                                                                                                                                                                                                                                                        |
| P62280  | (5)Ribosomal_S17_N(73)~(75)Ribosomal_S17(144)                                                                                                                                                                                                                                                                                                         |
| P01780  | (12)V-set(115)                                                                                                                                                                                                                                                                                                                                        |
| Q9HBX9  | (127)LRR_8(186)~(141)LRR_5(233)~(247)LRR_8(307)~(422)7tm_1(681)                                                                                                                                                                                                                                                                                       |
| O95819  | (25)Pkinase(289)~(931)CNH(1209)                                                                                                                                                                                                                                                                                                                       |
| Q13164  | (55)Pkinase(347)                                                                                                                                                                                                                                                                                                                                      |
| Q13360  | (14)KRAB(54)~(163)zf-H2C2_2(186)~(284)zf-C2H2(306)~(298)zf-H2C2_2(322)~(326)zf-H2C2_2(350)~(354)zf-H2C2_2(377)~(382)zf-H2C2_2(407)~(413)zf-H2C2_2(435)~(439)zf-H2C2_2(463)                                                                                                                                                                            |
| Q8NB42  | (14)KRAB(54)~(294)zf-H2C2_2(313)~(317)zf-H2C2_2(340)~(344)zf-H2C2_2(369)~(373)zf-H2C2_2(396)~(400)zf-H2C2_2(425)~(428)zf-H2C2_2(453)~(456)zf-H2C2_2(481)~(485)zf-H2C2_2(508)~(516)zf-H2C2_2(536)~(541)zf-H2C2_2(564)~(568)zf-H2C2_2(592)                                                                                                              |
| Q92527  | (29)Ank_2(122)~(126)Ank_2(188)~(157)Ank_5(198)                                                                                                                                                                                                                                                                                                        |
| Q6IV72  | (9)KRAB(49)~(190)zf-C2H2(212)~(260)zf-H2C2_2(284)~(274)zf-C2H2(296)~(317)zf-H2C2_2(339)~(358)zf-C2H2(380)~(401)zf-H2C2_2(423)~(432)zf-H2C2_2(451)~(457)zf-H2C2_2(481)~(498)zf-C2H2(520)~(513)zf-H2C2_2(536)~(540)zf-H2C2_2(564)~(582)zf-C2H2(604)~(597)zf-H2C2_2(619)~(624)zf-H2C2_2(649)~(653)zf-H2C2_2(675)~(680)zf-H2C2_2(704)~(709)zf-H2C2_2(733) |
| Q9BWU1  | (26)Pkinase(335)                                                                                                                                                                                                                                                                                                                                      |
| Q9HAD4  | (36)WD40(70)~(75)WD40(119)~(317)WD40(349)                                                                                                                                                                                                                                                                                                             |
| Q9Y6I0  | (7)RVP(105)~(112)G-patch(154)                                                                                                                                                                                                                                                                                                                         |
| Q5TYW2  | (37)Ank_2(130)~(137)Ank_2(229)~(514)CCDC144C(805)                                                                                                                                                                                                                                                                                                     |
| Q15772  | (43)I-set(125)~(722)I-set(811)~(812)SPEG_u2(868)~(869)I-set(959)~(972)I-set(1058)~(1064)I-set(1153)~(1188)I-set(1277)~(1391)I-set(1480)~(1485)I-set(1574)~(1601)Pkinase(1854)~(2584)I-set(2674)~(2974)Pkinase(3218)                                                                                                                                   |
| Q6B0I6  | (19)JmjN(53)~(179)JmjC(295)                                                                                                                                                                                                                                                                                                                           |
| Q17RY0  | (471)RRM_7(560)~(582)RRM_1(640)~(653)CEBP_ZZ(715)                                                                                                                                                                                                                                                                                                     |
| Q8NI27  | (11)THOC2_N(418)~(420)THOC2_N(566)~(568)Thoc2(643)~(873)Tho2(1173)                                                                                                                                                                                                                                                                                    |
| Q9Y2L1  | (68)PIN_4(193)~(467)RNB(794)                                                                                                                                                                                                                                                                                                                          |
| Q8WW33  | (14)zf-U11-48K(38)~(48)zf-U11-48K(71)                                                                                                                                                                                                                                                                                                                 |
| Q5CZ79  | (37)Ank_2(130)~(137)Ank_2(229)~(514)CCDC144C(805)                                                                                                                                                                                                                                                                                                     |
| Q09FC8  | (292)zf-C2H2(314)~(306)zf-H2C2_2(331)~(337)zf-H2C2_2(359)~(365)zf-H2C2_2(386)~(404)zf-C2H2(426)~(419)zf-H2C2_2(442)~(446)zf-H2C2_2(471)~(474)zf-H2C2_2(498)~(502)zf-H2C2_2(526)~(530)zf-H2C2_2(554)~(558)zf-H2C2_2(582)~(572)zf-C2H2(594)                                                                                                             |
| P43897  | (117)EF_TS(268)~(280)EF_TS(317)                                                                                                                                                                                                                                                                                                                       |
| Q9UIK4  | (23)Pkinase(285)                                                                                                                                                                                                                                                                                                                                      |
| Q6ZNNQ3 | (37)LRR_8(95)~(61)LRR_8(119)~(177)LRR_8(233)                                                                                                                                                                                                                                                                                                          |
| Q9NX24  | (46)Ribosomal_L7Ae(137)                                                                                                                                                                                                                                                                                                                               |
| P09234  | (1)zf-U1(38)                                                                                                                                                                                                                                                                                                                                          |
| Q7L0R7  | (380)zf-RING_2(421)                                                                                                                                                                                                                                                                                                                                   |
| P09093  | (30)Trypsin(263)                                                                                                                                                                                                                                                                                                                                      |
| Q99683  | (165)DUF4071(545)~(685)Pkinase(937)                                                                                                                                                                                                                                                                                                                   |
| Q9H5Z1  | (265)Helicase_C(397)~(459)HA2(548)~(596)OB_NTP_bind(683)                                                                                                                                                                                                                                                                                              |
| P19387  | (50)RNA_pol_A_bac(177)                                                                                                                                                                                                                                                                                                                                |
| Q92540  | (55)EST1(168)~(171)EST1_DNA_bind(430)                                                                                                                                                                                                                                                                                                                 |
| Q15031  | (69)tRNA-synt_1(318)~(444)tRNA-synt_1(600)~(638)tRNA-synt_1(678)~(726)Anticodon_1(849)                                                                                                                                                                                                                                                                |
| Q96IR2  | (8)KRAB(48)~(230)zf-H2C2_2(253)~(258)zf-H2C2_2(281)~(299)zf-C2H2(321)~(313)zf-                                                                                                                                                                                                                                                                        |

|        |                                                                                                                                                                                                                                                                                                                                                                                                                                                                                   |
|--------|-----------------------------------------------------------------------------------------------------------------------------------------------------------------------------------------------------------------------------------------------------------------------------------------------------------------------------------------------------------------------------------------------------------------------------------------------------------------------------------|
|        | H2C2_2(337)~(342)zf-H2C2_2(365)~(369)zf-H2C2_2(394)~(397)zf-H2C2_2(421)~(425)zf-H2C2_2(449)~(453)zf-H2C2_2(477)~(481)zf-H2C2_2(505)~(509)zf-H2C2_2(534)~(537)zf-H2C2_2(560)~(551)zf-C2H2(573)~(579)zf-C2H2(601)~(623)zf-H2C2_2(645)~(635)zf-C2H2(657)~(649)zf-H2C2_2(674)~(678)zf-H2C2_2(701)~(706)zf-H2C2_2(729)~(733)zf-H2C2_2(758)~(761)zf-H2C2_2(785)~(789)zf-H2C2_2(814)~(817)zf-H2C2_2(842)~(845)zf-H2C2_2(869)~(873)zf-H2C2_2(897)~(901)zf-H2C2_2(926)~(930)zf-H2C2_2(953) |
| Q52WX2 | (53)Pkinase(310)                                                                                                                                                                                                                                                                                                                                                                                                                                                                  |
| Q9BYP7 | (152)Pkinase(405)~(426)OSR1_C(463)                                                                                                                                                                                                                                                                                                                                                                                                                                                |
| Q8N145 | (112)LRR_8(172)~(222)EPTP(263)~(270)EPTP(309)~(314)EPTP(359)~(363)EPTP(405)~(414)EPTP(452)~(455)EPTP(496)~(501)EPTP(540)                                                                                                                                                                                                                                                                                                                                                          |
| Q96F44 | (16)zf-C3HC4_4(56)~(289)PRY(337)~(341)SPRY(443)                                                                                                                                                                                                                                                                                                                                                                                                                                   |
| Q13435 | (471)DUF382(596)~(605)PSP(654)                                                                                                                                                                                                                                                                                                                                                                                                                                                    |
| O75951 | (22)Lys(141)                                                                                                                                                                                                                                                                                                                                                                                                                                                                      |
| P62879 | (47)WD40(83)~(98)WD40(124)~(137)WD40(170)~(180)WD40(212)~(218)WD40(254)~(266)WD40(298)~(306)WD40(340)                                                                                                                                                                                                                                                                                                                                                                             |
| Q8N4C8 | (25)Pkinase(289)~(1024)CNH(1302)                                                                                                                                                                                                                                                                                                                                                                                                                                                  |
| Q9UNP9 | (8)RRM_1(78)~(143)Pro_isomerase(298)                                                                                                                                                                                                                                                                                                                                                                                                                                              |
| Q8N972 | (4)KRAB(44)~(116)zf-H2C2_2(150)~(155)zf-H2C2_2(178)~(183)zf-H2C2_2(205)~(212)zf-H2C2_2(235)~(239)zf-H2C2_2(262)~(268)zf-H2C2_2(288)~(295)zf-H2C2_2(318)~(323)zf-H2C2_2(345)~(350)zf-H2C2_2(374)~(379)zf-H2C2_2(402)~(407)zf-H2C2_2(430)~(436)zf-H2C2_2(458)~(463)zf-H2C2_2(486)~(491)zf-H2C2_2(514)~(519)zf-H2C2_2(542)~(548)zf-H2C2_2(570)~(576)zf-H2C2_2(598)~(603)zf-H2C2_2(626)                                                                                               |
| P01623 | (6)V-set(107)                                                                                                                                                                                                                                                                                                                                                                                                                                                                     |
| Q562E7 | (351)Beach(571)                                                                                                                                                                                                                                                                                                                                                                                                                                                                   |
| P04070 | (47)Gla(85)~(140)FXa_inhibition(175)~(213)Trypsin(445)                                                                                                                                                                                                                                                                                                                                                                                                                            |
| Q8WUM0 | (598)Nucleoporin_C(1002)                                                                                                                                                                                                                                                                                                                                                                                                                                                          |
| Q53GS7 | (410)GLE1(648)                                                                                                                                                                                                                                                                                                                                                                                                                                                                    |
| Q03924 | (109)zf-C2H2(129)~(152)zf-H2C2_2(175)~(179)zf-H2C2_2(203)~(193)zf-C2H2(215)~(236)zf-H2C2_2(259)~(264)zf-H2C2_2(287)~(292)zf-H2C2_2(316)~(319)zf-H2C2_2(343)~(347)zf-H2C2_2(371)~(361)zf-C2H2(383)~(417)zf-C2H2(439)~(435)zf-H2C2_2(455)~(445)zf-C2H2(467)                                                                                                                                                                                                                         |
| P17031 | (15)KRAB(54)~(175)zf-C2H2(196)~(191)zf-H2C2_2(212)~(216)zf-H2C2_2(240)~(230)zf-C2H2(252)~(273)zf-H2C2_2(296)~(303)zf-H2C2_2(324)~(329)zf-H2C2_2(351)~(359)zf-H2C2_2(380)~(370)zf-C2H2(392)~(413)zf-H2C2_2(435)~(443)zf-H2C2_2(463)~(468)zf-H2C2_2(493)~(496)zf-H2C2_2(519)                                                                                                                                                                                                        |
| P01609 | (6)V-set(104)                                                                                                                                                                                                                                                                                                                                                                                                                                                                     |
| P06493 | (4)Pkinase(287)                                                                                                                                                                                                                                                                                                                                                                                                                                                                   |
| P61964 | (39)WD40(72)~(79)WD40(115)~(119)WD40(157)~(144)eIF2A(251)~(161)WD40(199)~(293)WD40(331)                                                                                                                                                                                                                                                                                                                                                                                           |
| P61927 | (2)Ribosomal_L37e(54)                                                                                                                                                                                                                                                                                                                                                                                                                                                             |
| Q969S9 | (69)GTP_EFTU(351)~(485)EFG_II(558)~(561)EFG_IV(681)~(685)EFG_C(770)                                                                                                                                                                                                                                                                                                                                                                                                               |
| P49841 | (56)Pkinase(340)                                                                                                                                                                                                                                                                                                                                                                                                                                                                  |
| O95747 | (17)Pkinase(291)~(434)OSR1_C(464)                                                                                                                                                                                                                                                                                                                                                                                                                                                 |
| Q8N141 | (6)KRAB(46)~(160)zf-H2C2_2(179)~(185)zf-H2C2_2(208)~(212)zf-H2C2_2(235)~(240)zf-H2C2_2(263)~(269)zf-H2C2_2(292)~(282)zf-C2H2(302)~(325)zf-H2C2_2(347)~(353)zf-H2C2_2(377)~(383)zf-H2C2_2(404)~(394)zf-C2H2(416)~(437)zf-H2C2_2(459)~(465)zf-H2C2_2(487)~(493)zf-H2C2_2(516)                                                                                                                                                                                                       |
| Q9Y2U5 | (44)PB1(120)~(358)Pkinase(615)                                                                                                                                                                                                                                                                                                                                                                                                                                                    |
| P05198 | (14)S1(88)~(130)EIF_2_alpha(243)                                                                                                                                                                                                                                                                                                                                                                                                                                                  |
| Q9NR97 | (54)LRR_8(97)~(125)LRR_4(161)~(190)LRR_8(219)~(222)LRR_8(256)~(277)LRR_8(323)~(394)LRR_8(433)~(485)LRR_8(542)~(579)LRR_8(620)~(640)LRR_8(700)~(712)LRR_8(773)~(880)TIR(1026)                                                                                                                                                                                                                                                                                                      |

|        |                                                                                                                                                                                                                                                                                                                                                                                                                                                                              |
|--------|------------------------------------------------------------------------------------------------------------------------------------------------------------------------------------------------------------------------------------------------------------------------------------------------------------------------------------------------------------------------------------------------------------------------------------------------------------------------------|
| Q8WZ74 | (33)CortBP2(138)~(193)CortBP2(268)~(714)Ank_2(804)~(778)Ank_4(830)~(809)Ank_2(865)~(907)Ank_5(954)                                                                                                                                                                                                                                                                                                                                                                           |
| Q6P3V2 | (27)KRAB(67)~(145)zf-H2C2_2(168)~(176)zf-H2C2_2(195)~(186)zf-C2H2(208)~(201)zf-H2C2_2(225)~(228)zf-H2C2_2(253)~(242)zf-C2H2(264)~(285)zf-H2C2_2(307)~(298)zf-C2H2(320)~(356)zf-C2H2(376)~(371)zf-H2C2_2(393)~(382)zf-C2H2(404)~(425)zf-H2C2_2(449)~(456)zf-H2C2_2(477)~(480)zf-H2C2_2(505)~(509)zf-H2C2_2(533)~(536)zf-H2C2_2(560)~(567)zf-H2C2_2(587)~(595)zf-H2C2_2(617)~(634)zf-C2H2(656)~(648)zf-H2C2_2(672)~(679)zf-H2C2_2(700)~(705)zf-H2C2_2(728)~(732)zf-H2C2_2(756) |
| O60603 | (77)LRR_8(134)~(150)LRR_8(205)~(355)LRR_8(372)~(387)LRR_8(448)~(477)LRR_8(535)~(643)TIR(782)                                                                                                                                                                                                                                                                                                                                                                                 |
| Q8TDJ6 | (1143)Rav1p_C(1380)~(1496)Rav1p_C(1903)~(2933)WD40(2969)                                                                                                                                                                                                                                                                                                                                                                                                                     |
| Q8NDP4 | (19)KRAB(59)~(167)zf-H2C2_2(193)~(202)zf-H2C2_2(224)~(231)zf-H2C2_2(253)~(258)zf-H2C2_2(280)~(287)zf-H2C2_2(307)~(314)zf-H2C2_2(334)~(341)zf-H2C2_2(364)~(369)zf-H2C2_2(393)~(397)zf-H2C2_2(420)~(424)zf-H2C2_2(448)~(453)zf-H2C2_2(476)                                                                                                                                                                                                                                     |
| Q8IXT5 | (5)RRM_6(69)~(157)RRM_6(224)~(286)RRM_6(353)~(402)RRM_6(457)~(927)RRM_6(988)                                                                                                                                                                                                                                                                                                                                                                                                 |
| Q9HBH9 | (87)Pkinase(368)                                                                                                                                                                                                                                                                                                                                                                                                                                                             |
| Q16629 | (13)RRM_1(77)                                                                                                                                                                                                                                                                                                                                                                                                                                                                |
| P0C7T5 | (469)AXH(580)                                                                                                                                                                                                                                                                                                                                                                                                                                                                |
| Q8IUH3 | (34)RRM_1(92)~(127)RRM_1(183)~(259)RRM_1(311)~(411)RRM_5(460)                                                                                                                                                                                                                                                                                                                                                                                                                |
| P0C7Q3 | (34)Cyclin_N(140)                                                                                                                                                                                                                                                                                                                                                                                                                                                            |
| O94911 | (38)ABC2_membrane_3(418)~(499)ABC_tran(619)~(901)ABC2_membrane_3(1140)~(1267)ABC_tran(1405)                                                                                                                                                                                                                                                                                                                                                                                  |
| Q69384 | (19)HERV-K_REC(105)~(115)HERV-K_env_2(283)~(486)GP41(682)                                                                                                                                                                                                                                                                                                                                                                                                                    |
| P01880 | (18)C1-set(95)~(177)ig(263)~(290)C1-set(363)                                                                                                                                                                                                                                                                                                                                                                                                                                 |
| A6NEQ0 | (10)RRM_1(79)~(174)RBM1CTR(218)                                                                                                                                                                                                                                                                                                                                                                                                                                              |
| Q8IVW4 | (4)Pkinase(286)                                                                                                                                                                                                                                                                                                                                                                                                                                                              |
| P62424 | (131)Ribosomal_L7Ae(212)                                                                                                                                                                                                                                                                                                                                                                                                                                                     |
| Q99558 | (405)Pkinase(598)                                                                                                                                                                                                                                                                                                                                                                                                                                                            |
| A7E2S9 | (42)Ank_2(135)~(138)Ank_2(201)                                                                                                                                                                                                                                                                                                                                                                                                                                               |
| Q9H2Y7 | (1525)WD40(1557)~(1562)WD40(1602)~(1647)WD40(1684)                                                                                                                                                                                                                                                                                                                                                                                                                           |
| Q5QJE6 | (638)Fcf2(731)                                                                                                                                                                                                                                                                                                                                                                                                                                                               |
| O43290 | (117)SART-1(753)                                                                                                                                                                                                                                                                                                                                                                                                                                                             |
| Q8TC84 | (145)Ank_4(196)~(214)Ank_2(308)                                                                                                                                                                                                                                                                                                                                                                                                                                              |
| Q14147 | (377)Helicase_C(496)~(557)HA2(645)~(685)OB_NTP_bind(910)                                                                                                                                                                                                                                                                                                                                                                                                                     |
| P60842 | (57)DEAD(221)~(258)Helicase_C(367)                                                                                                                                                                                                                                                                                                                                                                                                                                           |
| Q9UJU3 | (8)KRAB(46)~(512)zf-H2C2_2(536)~(540)zf-H2C2_2(564)~(568)zf-H2C2_2(592)~(596)zf-H2C2_2(620)~(623)zf-H2C2_2(647)~(651)zf-H2C2_2(675)~(680)zf-H2C2_2(703)~(693)zf-C2H2(715)~(736)zf-H2C2_2(759)~(764)zf-H2C2_2(787)~(777)zf-C2H2(799)~(819)zf-H2C2_2(843)~(847)zf-H2C2_2(870)                                                                                                                                                                                                  |
| O75153 | (66)CLU_N(139)~(356)CLU(576)~(767)eIF3_p135(948)~(985)TPR_12(1047)~(1100)TPR_12(1177)                                                                                                                                                                                                                                                                                                                                                                                        |
| Q86WK7 | (86)LRR_8(145)~(183)LRR_8(208)                                                                                                                                                                                                                                                                                                                                                                                                                                               |
| Q6QEF8 | (5)DUF1899(68)~(78)WD40(109)~(122)WD40(160)~(176)WD40(203)~(344)WD40_4(386)                                                                                                                                                                                                                                                                                                                                                                                                  |
| Q9BWF3 | (4)RRM_1(64)~(81)RRM_1(142)                                                                                                                                                                                                                                                                                                                                                                                                                                                  |
| P24863 | (46)Cyclin_N(148)                                                                                                                                                                                                                                                                                                                                                                                                                                                            |
| Q6DD87 | (66)zf-C2H2(88)~(108)zf-H2C2_2(132)~(136)zf-H2C2_2(160)~(150)zf-C2H2(172)~(164)zf-H2C2_2(188)~(280)zf-C2H2(303)~(316)zf-C2H2_6(339)                                                                                                                                                                                                                                                                                                                                          |
| P78346 | (18)RNase_P_p30(224)                                                                                                                                                                                                                                                                                                                                                                                                                                                         |
| Q8N5X7 | (48)IF4E(194)                                                                                                                                                                                                                                                                                                                                                                                                                                                                |

|        |                                                                                                                                                                                                                                                                                                                                                                                                                                                                                                                                                                     |
|--------|---------------------------------------------------------------------------------------------------------------------------------------------------------------------------------------------------------------------------------------------------------------------------------------------------------------------------------------------------------------------------------------------------------------------------------------------------------------------------------------------------------------------------------------------------------------------|
| O75494 | (12)RRM_1(81)                                                                                                                                                                                                                                                                                                                                                                                                                                                                                                                                                       |
| Q6ZNG1 | (177)zf-H2C2_2(201)~(205)zf-H2C2_2(228)~(218)zf-C2H2(240)~(260)zf-H2C2_2(284)~(288)zf-H2C2_2(313)~(317)zf-H2C2_2(340)~(345)zf-H2C2_2(369)~(372)zf-H2C2_2(396)~(400)zf-H2C2_2(424)~(414)zf-C2H2(436)~(457)zf-H2C2_2(480)~(485)zf-H2C2_2(507)~(513)zf-H2C2_2(536)~(544)zf-H2C2_2(565)~(569)zf-H2C2_2(592)~(597)zf-H2C2_2(620)~(638)zf-C2H2(660)~(652)zf-H2C2_2(676)~(680)zf-H2C2_2(704)                                                                                                                                                                               |
| Q8NBJ9 | (170)SID-1_RNA_chan(832)                                                                                                                                                                                                                                                                                                                                                                                                                                                                                                                                            |
| O15393 | (153)SRCR_2(246)~(256)Trypsin(484)                                                                                                                                                                                                                                                                                                                                                                                                                                                                                                                                  |
| P08579 | (27)RRM_5(84)~(153)RRM_1(212)                                                                                                                                                                                                                                                                                                                                                                                                                                                                                                                                       |
| Q9NP92 | (1)PDCD9(429)                                                                                                                                                                                                                                                                                                                                                                                                                                                                                                                                                       |
| Q13151 | (9)RRM_1(69)~(100)RRM_1(157)                                                                                                                                                                                                                                                                                                                                                                                                                                                                                                                                        |
| Q9UK45 | (14)LSM(86)                                                                                                                                                                                                                                                                                                                                                                                                                                                                                                                                                         |
| Q32P51 | (16)RRM_1(81)~(107)RRM_1(168)~(257)HnRNPA1(292)                                                                                                                                                                                                                                                                                                                                                                                                                                                                                                                     |
| O43251 | (124)RRM_1(190)~(265)Fox-1_C(362)                                                                                                                                                                                                                                                                                                                                                                                                                                                                                                                                   |
| O43148 | (137)Pox_MCEL(475)                                                                                                                                                                                                                                                                                                                                                                                                                                                                                                                                                  |
| Q86TJ5 | (45)KRAB(84)~(324)zf-C2H2(346)~(338)zf-H2C2_2(363)~(367)zf-H2C2_2(390)~(394)zf-H2C2_2(417)~(426)zf-H2C2_2(446)~(450)zf-H2C2_2(474)~(478)zf-H2C2_2(502)~(492)zf-C2H2(514)                                                                                                                                                                                                                                                                                                                                                                                            |
| O15111 | (16)Pkinase(289)~(707)IKKbetaNEMObind(743)                                                                                                                                                                                                                                                                                                                                                                                                                                                                                                                          |
| Q9H0D6 | (1)XRN_N(254)                                                                                                                                                                                                                                                                                                                                                                                                                                                                                                                                                       |
| B1ANS9 | (330)WD40(350)~(497)WD40(528)                                                                                                                                                                                                                                                                                                                                                                                                                                                                                                                                       |
| A6NGE4 | (428)WD40(465)~(478)WD40(508)                                                                                                                                                                                                                                                                                                                                                                                                                                                                                                                                       |
| Q99895 | (30)Trypsin(262)                                                                                                                                                                                                                                                                                                                                                                                                                                                                                                                                                    |
| Q4G0J3 | (38)La(95)~(127)RRM_1(188)~(454)RRM_3(552)                                                                                                                                                                                                                                                                                                                                                                                                                                                                                                                          |
| Q9H790 | (71)Exo5(191)~(193)Exo5(355)                                                                                                                                                                                                                                                                                                                                                                                                                                                                                                                                        |
| Q9GZV1 | (154)Ank_2(244)~(249)Ank_4(300)                                                                                                                                                                                                                                                                                                                                                                                                                                                                                                                                     |
| Q9UHB9 | (75)SRP68(598)                                                                                                                                                                                                                                                                                                                                                                                                                                                                                                                                                      |
| Q86WB0 | (73)zf-C3HC(199)~(248)Rsm1(333)~(411)Rsm1(464)                                                                                                                                                                                                                                                                                                                                                                                                                                                                                                                      |
| Q96NG5 | (43)KRAB(83)~(166)zf-H2C2_2(191)~(195)zf-H2C2_2(218)~(208)zf-C2H2(230)~(250)zf-H2C2_2(275)~(292)zf-C2H2(314)~(307)zf-H2C2_2(331)~(334)zf-H2C2_2(359)~(363)zf-H2C2_2(387)                                                                                                                                                                                                                                                                                                                                                                                            |
| O43167 | (27)BTB(131)~(310)zf-H2C2_2(332)~(336)zf-H2C2_2(359)~(364)zf-H2C2_2(388)~(421)zf-H2C2_2(444)~(448)zf-H2C2_2(472)~(478)zf-H2C2_2(500)                                                                                                                                                                                                                                                                                                                                                                                                                                |
| Q9NQT4 | (28)RNase_PH(147)                                                                                                                                                                                                                                                                                                                                                                                                                                                                                                                                                   |
| P49590 | (62)tRNA-synt_His(390)~(411)HGTP_anticodon(501)                                                                                                                                                                                                                                                                                                                                                                                                                                                                                                                     |
| Q14690 | (82)S1(133)~(185)S1(257)~(281)S1(336)~(451)S1(521)~(547)S1(610)~(634)S1(672)~(731)S1(798)~(1035)S1(1096)~(1226)S1(1288)~(1322)S1(1389)~(1623)Suf(1687)~(1727)Suf(1868)                                                                                                                                                                                                                                                                                                                                                                                              |
| Q04721 | (33)EGF(60)~(68)EGF(99)~(113)EGF(140)~(148)EGF(177)~(182)EGF_CA(214)~(225)EGF(255)~(264)EGF(292)~(298)EGF_CA(331)~(350)EGF(370)~(379)EGF(410)~(415)EGF_CA(449)~(460)EGF(489)~(498)EGF(527)~(536)EGF(564)~(574)EGF(601)~(611)EGF(639)~(649)EGF(678)~(686)EGF(711)~(724)EGF(753)~(761)EGF(789)~(799)EGF(829)~(837)EGF(869)~(873)EGF_CA(904)~(915)EGF(944)~(953)EGF(982)~(991)EGF(1020)~(1029)EGF(1059)~(1067)EGF(1097)~(1423)Notch(1456)~(1463)Notch(1497)~(1501)Notch(1534)~(1539)NOD(1594)~(1618)NODP(1672)~(1820)Ank_2(1907)~(1958)Ank_2(2039)~(2382)DUF3454(2444) |
| Q6ZMR5 | (49)SEA(152)~(192)Trypsin(415)                                                                                                                                                                                                                                                                                                                                                                                                                                                                                                                                      |
| O15446 | (38)RNA_polI_A34(272)                                                                                                                                                                                                                                                                                                                                                                                                                                                                                                                                               |
| Q3KNS6 | (35)KRAB(75)~(157)zf-C2H2(178)~(200)zf-H2C2_2(222)~(227)zf-H2C2_2(251)~(254)zf-H2C2_2(278)~(286)zf-H2C2_2(307)~(313)zf-H2C2_2(334)~(324)zf-C2H2(346)~(368)zf-H2C2_2(390)~(394)zf-H2C2_2(418)                                                                                                                                                                                                                                                                                                                                                                        |

|        |                                                                                                                                                                                                                                                                                                      |
|--------|------------------------------------------------------------------------------------------------------------------------------------------------------------------------------------------------------------------------------------------------------------------------------------------------------|
| Q9NWS0 | (30)PIH1(192)~(215)PIH1(284)                                                                                                                                                                                                                                                                         |
| Q8NI36 | (153)WD40(187)~(613)WD40(650)~(733)Utp21(947)                                                                                                                                                                                                                                                        |
| Q8IZD4 | (14)DCP1(128)~(575)mRNA_decap_C(615)                                                                                                                                                                                                                                                                 |
| P82930 | (61)MRP-S34(186)                                                                                                                                                                                                                                                                                     |
| P01700 | (5)V-set(111)                                                                                                                                                                                                                                                                                        |
| P00973 | (164)OAS1_C(344)                                                                                                                                                                                                                                                                                     |
| O15457 | (155)MutS_II(292)~(316)MutS_III(627)~(635)MutS_V(870)                                                                                                                                                                                                                                                |
| O75179 | (238)Ank_2(330)~(303)Ank_4(354)~(333)Ank_2(394)~(367)Ank_4(421)~(400)Ank_2(461)~(468)Ank_2(529)~(500)Ank_4(554)~(568)Ank_2(659)~(630)Ank_4(684)~(1074)Ank_2(1144)~(1102)Ank_5(1157)~(1151)Ank_2(1212)~(1222)Ank_2(1313)~(1324)Ank_2(1409)~(1728)KH_1(1789)                                           |
| Q2VIR3 | (41)GTP_EFTU(244)~(276)GTP_EFTU_D2(358)~(370)eIF2_C(459)                                                                                                                                                                                                                                             |
| Q15434 | (58)RRM_1(118)~(137)RRM_1(201)                                                                                                                                                                                                                                                                       |
| Q9Y252 | (632)zf-RING_2(673)                                                                                                                                                                                                                                                                                  |
| Q9BRX9 | (18)WD40(53)~(58)WD40(95)~(100)WD40(137)~(223)WD40(263)                                                                                                                                                                                                                                              |
| Q96NL3 | (9)KRAB(49)~(213)zf-H2C2_2(236)~(244)zf-H2C2_2(266)~(269)zf-H2C2_2(294)~(312)zf-C2H2(333)~(327)zf-H2C2_2(350)~(357)zf-H2C2_2(376)~(382)zf-H2C2_2(406)~(412)zf-H2C2_2(432)~(438)zf-H2C2_2(462)~(468)zf-H2C2_2(490)~(494)zf-H2C2_2(518)~(521)zf-H2C2_2(544)~(549)zf-H2C2_2(574)                        |
| Q16512 | (39)HR1(98)~(128)HR1(189)~(214)HR1(276)~(616)Pkinase(874)                                                                                                                                                                                                                                            |
| P01701 | (5)V-set(110)                                                                                                                                                                                                                                                                                        |
| Q8N8A2 | (12)Ank_2(104)~(140)Ank_4(189)~(177)Ank_2(267)~(276)Ank_2(364)~(376)Ank_2(468)~(438)Ank_4(479)~(536)Ank_2(630)~(634)Ank_2(700)~(708)Ank_2(794)~(808)Ank_2(903)~(858)Ank_5(913)~(907)Ank_4(958)                                                                                                       |
| P14866 | (106)RRM_1(155)~(211)RRM_5(268)~(399)RRM_5(454)                                                                                                                                                                                                                                                      |
| P49588 | (9)tRNA-synt_2c(596)~(694)tRNA_SAD(753)~(887)DHHA1(955)                                                                                                                                                                                                                                              |
| P0CF75 | (31)BDV_P40(349)                                                                                                                                                                                                                                                                                     |
| Q0VGE8 | (24)KRAB(63)~(244)zf-H2C2_2(267)~(274)zf-H2C2_2(296)~(299)zf-H2C2_2(323)~(327)zf-H2C2_2(351)~(355)zf-H2C2_2(379)~(383)zf-H2C2_2(406)~(411)zf-H2C2_2(435)~(440)zf-H2C2_2(464)~(467)zf-H2C2_2(492)~(495)zf-H2C2_2(520)~(523)zf-H2C2_2(547)~(552)zf-H2C2_2(575)~(580)zf-H2C2_2(603)~(607)zf-H2C2_2(631) |
| Q8WWH4 | (65)Ank_5(105)~(117)Ank_2(210)                                                                                                                                                                                                                                                                       |
| A6NC97 | (37)Arb2(168)                                                                                                                                                                                                                                                                                        |
| Q86TW2 | (143)ABC1(259)                                                                                                                                                                                                                                                                                       |
| Q9H6R0 | (285)Helicase_C(408)~(471)HA2(562)~(613)OB_NTP_bind(696)                                                                                                                                                                                                                                             |
| P11801 | (98)Pkinase(355)                                                                                                                                                                                                                                                                                     |
| Q9GZL7 | (5)NLE(70)~(100)WD40(127)~(131)WD40(170)~(182)WD40(217)~(249)WD40(284)~(290)WD40(325)~(337)WD40(371)                                                                                                                                                                                                 |
| P63123 | (7)RVP(105)~(112)G-patch(154)                                                                                                                                                                                                                                                                        |
| Q96E11 | (99)RRF(261)                                                                                                                                                                                                                                                                                         |
| Q8IW52 | (64)LRR_5(176)~(86)LRR_8(143)~(410)LRR_5(506)~(425)LRR_8(485)                                                                                                                                                                                                                                        |
| P28288 | (59)ABC_membrane_2(338)~(457)ABC_tran(599)                                                                                                                                                                                                                                                           |
| Q9BYE2 | (232)SRCR_2(320)~(326)Trypsin(554)                                                                                                                                                                                                                                                                   |
| Q06787 | (6)Agenet(52)~(63)Agenet(119)~(222)KH_1(277)~(285)KH_1(322)~(420)FXMRP1_C_core(542)~(549)FXMR_C2(632)                                                                                                                                                                                                |
| O60237 | (64)Ank_2(153)~(210)Ank_5(257)~(881)PRKG1_interact(982)                                                                                                                                                                                                                                              |
| Q7Z739 | (417)YTH(550)                                                                                                                                                                                                                                                                                        |
| P62913 | (10)Ribosomal_L5(63)~(67)Ribosomal_L5_C(165)                                                                                                                                                                                                                                                         |
| Q8TF47 | (14)KRAB(54)~(211)zf-C2H2(233)~(269)zf-H2C2_2(293)~(299)zf-H2C2_2(319)~(324)zf-H2C2_2(349)~(352)zf-H2C2_2(377)~(380)zf-H2C2_2(404)~(450)zf-C2H2(472)~(490)zf-                                                                                                                                        |

|        |                                                                                                                                                                                                                                                                                                                                                                                                                                                                                                     |
|--------|-----------------------------------------------------------------------------------------------------------------------------------------------------------------------------------------------------------------------------------------------------------------------------------------------------------------------------------------------------------------------------------------------------------------------------------------------------------------------------------------------------|
|        | H2C2_2(508)~(514)zf-H2C2_2(536)~(539)zf-H2C2_2(563)~(568)zf-H2C2_2(591)~(609)zf-C2H2(631)                                                                                                                                                                                                                                                                                                                                                                                                           |
| Q9UL36 | (52)zf-H2C2_2(76)~(94)zf-C2H2(115)~(123)zf-C2H2(143)~(152)zf-C2H2_jaz(175)~(197)zf-C2H2(219)~(212)zf-H2C2_2(235)~(239)zf-H2C2_2(263)~(284)zf-C2H2_6(309)~(496)zf-H2C2_2(520)~(525)zf-H2C2_2(549)~(552)zf-H2C2_2(577)~(671)zf-H2C2_2(695)~(700)zf-H2C2_2(724)~(727)zf-H2C2_2(752)~(981)zf-H2C2_2(1005)~(1023)zf-C2H2(1045)~(1037)zf-H2C2_2(1062)~(1181)zf-H2C2_2(1205)~(1223)zf-C2H2(1245)~(1237)zf-H2C2_2(1262)~(1672)zf-H2C2_2(1697)~(1688)zf-C2H2(1708)~(1722)zf-C2H2(1744)~(1750)zf-C2H2_4(1772) |
| Q9UNQ2 | (30)RrnaAD(254)                                                                                                                                                                                                                                                                                                                                                                                                                                                                                     |
| P25398 | (17)Ribosomal_L7Ae(110)                                                                                                                                                                                                                                                                                                                                                                                                                                                                             |
| P16520 | (47)WD40(83)~(98)WD40(125)~(137)WD40(170)~(175)WD40(212)~(216)WD40(254)~(266)WD40(298)~(305)WD40(340)                                                                                                                                                                                                                                                                                                                                                                                               |
| O75575 | (10)RNA_pol_Rpb4(122)                                                                                                                                                                                                                                                                                                                                                                                                                                                                               |
| Q6PDB4 | (8)KRAB(47)~(212)zf-C2H2(234)~(226)zf-H2C2_2(250)~(255)zf-H2C2_2(278)~(282)zf-H2C2_2(306)~(310)zf-H2C2_2(334)~(352)zf-C2H2(374)~(366)zf-H2C2_2(391)~(395)zf-H2C2_2(417)~(423)zf-H2C2_2(447)~(450)zf-H2C2_2(475)~(478)zf-H2C2_2(503)~(506)zf-H2C2_2(531)~(535)zf-H2C2_2(559)~(548)zf-C2H2(570)                                                                                                                                                                                                       |
| O95363 | (76)tRNA-synt_2d(198)~(242)tRNA-synt_2d(343)~(358)FDX-ACB(450)                                                                                                                                                                                                                                                                                                                                                                                                                                      |
| Q9H9Y6 | (37)RNA_pol_Rpb2_1(413)~(456)RNA_pol_Rpb2_3(520)~(563)RNA_pol_Rpa2_4(621)~(670)RNA_pol_Rpb2_6(1030)~(1033)RNA_pol_Rpb2_7(1133)                                                                                                                                                                                                                                                                                                                                                                      |
| Q9BYT3 | (116)Pkinase(381)                                                                                                                                                                                                                                                                                                                                                                                                                                                                                   |
| Q15650 | (169)zf-C2HC5(214)~(437)ASCH(531)                                                                                                                                                                                                                                                                                                                                                                                                                                                                   |
| Q12769 | (78)Nup160(577)                                                                                                                                                                                                                                                                                                                                                                                                                                                                                     |
| E5RJM6 | (45)Ank_2(135)~(93)Ank_5(147)~(144)Ank_2(233)~(242)Ank_2(330)~(273)Ank_2(364)                                                                                                                                                                                                                                                                                                                                                                                                                       |
| Q5SZQ8 | (9)RRM_1(76)~(97)RRM_1(162)~(382)RRM_1(452)                                                                                                                                                                                                                                                                                                                                                                                                                                                         |
| Q8N1B3 | (28)Cyclin_N(136)                                                                                                                                                                                                                                                                                                                                                                                                                                                                                   |
| Q9UKA9 | (77)RRM_5(131)~(197)RRM_5(255)~(355)RRM_5(410)~(457)RRM_6(513)                                                                                                                                                                                                                                                                                                                                                                                                                                      |
| Q96AE4 | (102)KH_1(164)~(188)KH_1(251)~(280)KH_1(339)~(381)KH_1(443)~(577)DUF1897(595)~(604)DUF1897(622)                                                                                                                                                                                                                                                                                                                                                                                                     |
| P01767 | (13)V-set(113)                                                                                                                                                                                                                                                                                                                                                                                                                                                                                      |
| Q12788 | (111)WD40(137)~(186)WD40(223)~(370)WD40(403)~(416)WD40(449)~(472)WD40(506)~(512)WD40(548)~(554)WD40(590)~(596)WD40(633)~(654)Utp13(788)                                                                                                                                                                                                                                                                                                                                                             |
| Q8WVZ7 | (102)PA(163)~(255)zf-RING_2(297)                                                                                                                                                                                                                                                                                                                                                                                                                                                                    |
| O43776 | (128)tRNA_anti-codon(208)~(226)tRNA-synt_2(541)                                                                                                                                                                                                                                                                                                                                                                                                                                                     |
| Q5ST30 | (113)tRNA-synt_1(729)~(779)Anticodon_1(927)                                                                                                                                                                                                                                                                                                                                                                                                                                                         |
| Q9BYD6 | (107)Ribosomal_L1(300)                                                                                                                                                                                                                                                                                                                                                                                                                                                                              |
| P61565 | (19)HERV-K_REC(104)~(114)HERV-K_env_2(282)~(485)GP41(681)                                                                                                                                                                                                                                                                                                                                                                                                                                           |
| B5ME19 | (31)eIF-3c_N(706)~(714)PCI(847)                                                                                                                                                                                                                                                                                                                                                                                                                                                                     |
| Q9H7Z6 | (55)Tudor-knot(110)~(235)MOZ_SAS(412)                                                                                                                                                                                                                                                                                                                                                                                                                                                               |
| P01711 | (5)V-set(110)                                                                                                                                                                                                                                                                                                                                                                                                                                                                                       |
| P36507 | (72)Pkinase(369)                                                                                                                                                                                                                                                                                                                                                                                                                                                                                    |
| P52597 | (13)RRM_6(84)~(114)RRM_1(181)~(255)zf-RNPHF(290)~(291)RRM_6(358)                                                                                                                                                                                                                                                                                                                                                                                                                                    |
| P57723 | (19)KH_1(79)~(103)KH_1(160)~(244)KH_1(305)                                                                                                                                                                                                                                                                                                                                                                                                                                                          |
| O43829 | (26)BTB(128)~(292)zf-H2C2_2(316)~(319)zf-H2C2_2(342)~(347)zf-H2C2_2(372)~(375)zf-H2C2_2(399)                                                                                                                                                                                                                                                                                                                                                                                                        |
| P06319 | (24)V-set(130)                                                                                                                                                                                                                                                                                                                                                                                                                                                                                      |
| Q12906 | (94)DZF(342)~(409)dsrm(464)~(527)dsrm(588)                                                                                                                                                                                                                                                                                                                                                                                                                                                          |
| Q96K83 | (46)zf-C2H2_6(67)~(118)zf-C2H2(140)~(162)zf-H2C2_2(185)~(188)zf-H2C2_2(212)~(247)zf-C2H2(269)~(281)zf-Di19(331)~(436)zf-C2H2_6(461)~(477)zf-Di19(504)~(512)zf-Di19(538)~(634)zf-C2H2_6(658)~(664)zf-Di19(717)~(722)zf-                                                                                                                                                                                                                                                                              |

|        |                                                                                                                                                                                                                                                                                                                                                                                                   |
|--------|---------------------------------------------------------------------------------------------------------------------------------------------------------------------------------------------------------------------------------------------------------------------------------------------------------------------------------------------------------------------------------------------------|
|        | Di19(775)~(809)zf-C2H2(832)~(930)zf-C2H2_6(954)~(944)zf-H2C2_2(968)~(1139)zf-C2H2_4(1161)~(1225)zf-C2H2_4(1247)~(1255)zf-Di19(1310)                                                                                                                                                                                                                                                               |
| O14920 | (16)Pkinase(289)~(706)IKKbetaNEMObind(742)                                                                                                                                                                                                                                                                                                                                                        |
| P63136 | (76)RVT_1(245)~(252)RVT_thumb(316)~(462)RNase_H(586)~(590)Integrase_Zn(627)~(644)rve(753)                                                                                                                                                                                                                                                                                                         |
| Q05048 | (8)CSTF1_dimer(61)~(106)WD40(134)~(166)WD40(201)~(260)WD40(290)~(295)WD40(333)~(391)WD40(424)                                                                                                                                                                                                                                                                                                     |
| Q9Y2V2 | (64)CSD(127)                                                                                                                                                                                                                                                                                                                                                                                      |
| Q17RB8 | (123)zf-C3HC4_4(149)~(476)zf-C3HC4_3(521)~(567)LON_substr_bdg(764)                                                                                                                                                                                                                                                                                                                                |
| Q8IZL8 | (78)RIX1(227)~(423)NUC202(488)~(569)NUC202(639)                                                                                                                                                                                                                                                                                                                                                   |
| Q8WVC0 | (374)Leo1(535)                                                                                                                                                                                                                                                                                                                                                                                    |
| Q92979 | (45)EMG1(238)                                                                                                                                                                                                                                                                                                                                                                                     |
| Q15973 | (13)KRAB(53)~(137)zf-H2C2_2(158)~(164)zf-H2C2_2(189)~(192)zf-H2C2_2(216)~(223)zf-H2C2_2(244)~(262)zf-C2H2(284)~(304)zf-H2C2_2(329)~(318)zf-C2H2(340)                                                                                                                                                                                                                                              |
| Q86U90 | (77)Sua5_yciO_yrdC(255)                                                                                                                                                                                                                                                                                                                                                                           |
| Q8IX18 | (463)HA2(541)~(613)OB_NTP_bind(698)                                                                                                                                                                                                                                                                                                                                                               |
| O75290 | (6)KRAB(46)~(165)zf-C2H2(187)~(179)zf-H2C2_2(202)~(208)zf-H2C2_2(231)~(236)zf-H2C2_2(259)~(249)zf-C2H2(271)~(263)zf-H2C2_2(287)~(292)zf-H2C2_2(315)~(321)zf-H2C2_2(343)~(348)zf-H2C2_2(371)~(376)zf-H2C2_2(399)~(389)zf-C2H2(411)~(403)zf-H2C2_2(427)~(432)zf-H2C2_2(455)~(461)zf-H2C2_2(483)~(487)zf-H2C2_2(510)~(516)zf-H2C2_2(539)~(543)zf-H2C2_2(566)~(571)zf-H2C2_2(594)~(600)zf-H2C2_2(623) |
| Q8IY21 | (768)DEAD(922)                                                                                                                                                                                                                                                                                                                                                                                    |
| P27694 | (5)Rep-A_N(104)~(197)tRNA_anti-codon(280)~(305)REPA_OB_2(402)~(461)Rep_fac-A_C(606)                                                                                                                                                                                                                                                                                                               |
| Q92966 | (202)zf-SNAP50_C(405)                                                                                                                                                                                                                                                                                                                                                                             |
| Q6NUM6 | (46)Flavodoxin_1(170)~(347)Radical_SAM(528)~(531)Wyosine_form(593)                                                                                                                                                                                                                                                                                                                                |
| Q99759 | (45)PB1(120)~(364)Pkinase(621)                                                                                                                                                                                                                                                                                                                                                                    |
| P52740 | (38)KRAB(78)~(128)zf-H2C2_2(151)~(236)zf-C2H2(258)~(291)zf-C2H2(313)~(306)zf-H2C2_2(330)~(337)zf-H2C2_2(358)~(361)zf-H2C2_2(385)~(389)zf-H2C2_2(414)~(420)zf-H2C2_2(442)~(445)zf-H2C2_2(469)~(473)zf-H2C2_2(498)~(504)zf-H2C2_2(526)~(532)zf-H2C2_2(554)~(560)zf-H2C2_2(581)~(587)zf-H2C2_2(610)~(627)zf-C2H2(649)~(641)zf-H2C2_2(665)~(670)zf-H2C2_2(694)                                        |
| Q5T1V6 | (227)DEAD(393)~(429)Helicase_C(540)                                                                                                                                                                                                                                                                                                                                                               |
| P29558 | (64)RRM_1(124)~(143)RRM_1(207)                                                                                                                                                                                                                                                                                                                                                                    |
| P68400 | (39)Pkinase(324)                                                                                                                                                                                                                                                                                                                                                                                  |
| Q9BYC9 | (15)Ribosomal_L20(116)                                                                                                                                                                                                                                                                                                                                                                            |
| Q2TAY7 | (212)WD40(242)~(243)Ge1_WD40(321)~(296)WD40(333)~(339)WD40(377)~(475)WD40(512)                                                                                                                                                                                                                                                                                                                    |
| Q92879 | (19)RRM_1(84)~(110)RRM_1(174)~(403)RRM_1(473)                                                                                                                                                                                                                                                                                                                                                     |
| Q9Y5Y6 | (89)SEA(164)~(227)CUB(331)~(340)CUB(444)~(454)Ldl_recept_a(486)~(488)Ldl_recept_a(523)~(525)Ldl_recept_a(559)~(566)Ldl_recept_a(602)~(615)Trypsin(849)                                                                                                                                                                                                                                            |
| Q9NW75 | (468)G-patch(510)                                                                                                                                                                                                                                                                                                                                                                                 |
| Q7Z5U6 | (128)WD40(165)~(237)WD40(269)                                                                                                                                                                                                                                                                                                                                                                     |
| P23083 | (27)V-set(116)                                                                                                                                                                                                                                                                                                                                                                                    |
| Q8NI60 | (319)ABC1(433)                                                                                                                                                                                                                                                                                                                                                                                    |
| Q7Z7K2 | (175)zf-H2C2_2(198)~(206)zf-H2C2_2(226)~(230)zf-H2C2_2(254)~(261)zf-H2C2_2(282)~(286)zf-H2C2_2(311)~(329)zf-C2H2_8(391)~(445)zf-H2C2_2(469)~(487)zf-C2H2(509)~(502)zf-H2C2_2(526)~(529)zf-H2C2_2(554)                                                                                                                                                                                             |
| Q12834 | (302)WD40(336)~(346)WD40(386)~(437)WD40(470)                                                                                                                                                                                                                                                                                                                                                      |
| A8MTI9 | (81)Trypsin(318)                                                                                                                                                                                                                                                                                                                                                                                  |



|        |                                                                                                                                                                                                                                                                                                                                                                                |
|--------|--------------------------------------------------------------------------------------------------------------------------------------------------------------------------------------------------------------------------------------------------------------------------------------------------------------------------------------------------------------------------------|
| Q9BYB4 | (255)WD40(280)~(286)WD40(322)                                                                                                                                                                                                                                                                                                                                                  |
| Q9UQG0 | (76)RVT_1(245)~(252)RVT_thumb(316)~(462)RNase_H(588)~(592)Integrase_Zn(629)~(646)rve(755)~(875)HERV-K_env_2(969)                                                                                                                                                                                                                                                               |
| Q9UHX1 | (131)RRM_1(201)~(228)RRM_1(297)~(503)RRM_1(542)                                                                                                                                                                                                                                                                                                                                |
| Q15835 | (58)RGS(174)~(193)Pkinase(443)                                                                                                                                                                                                                                                                                                                                                 |
| A6NP11 | (16)KRAB(56)~(200)zf-H2C2_2(223)~(228)zf-H2C2_2(251)~(255)zf-H2C2_2(279)~(285)zf-H2C2_2(307)~(311)zf-H2C2_2(334)~(339)zf-H2C2_2(362)~(367)zf-H2C2_2(390)~(395)zf-H2C2_2(418)~(423)zf-H2C2_2(446)~(451)zf-H2C2_2(474)                                                                                                                                                           |
| Q5U5Q3 | (234)KH_1(293)~(328)KH_1(387)~(606)zf-C3HC4_3(653)                                                                                                                                                                                                                                                                                                                             |
| Q13153 | (74)PBD(132)~(270)Pkinase(521)                                                                                                                                                                                                                                                                                                                                                 |
| O75437 | (13)KRAB(53)~(210)zf-C2H2(230)~(266)zf-C2H2(288)~(280)zf-H2C2_2(303)~(309)zf-H2C2_2(331)~(337)zf-H2C2_2(360)~(365)zf-H2C2_2(389)~(406)zf-C2H2(428)~(420)zf-H2C2_2(443)~(449)zf-H2C2_2(471)~(477)zf-H2C2_2(500)~(505)zf-H2C2_2(527)~(533)zf-H2C2_2(557)~(561)zf-H2C2_2(584)~(589)zf-H2C2_2(611)~(602)zf-C2H2(624)                                                               |
| Q15393 | (76)MMS1_N(592)~(863)CPSF_A(1183)                                                                                                                                                                                                                                                                                                                                              |
| O75473 | (92)LRR_8(150)~(175)LRR_5(304)~(187)LRR_8(246)~(329)LRR_4(370)~(375)LRR_8(434)                                                                                                                                                                                                                                                                                                 |
| Q9BXS6 | (159)NUSAP(436)                                                                                                                                                                                                                                                                                                                                                                |
| Q6NSZ9 | (38)SCAN(123)~(348)zf-C2H2(370)~(390)zf-H2C2_2(413)~(417)zf-H2C2_2(441)~(445)zf-H2C2_2(469)~(472)zf-H2C2_2(496)~(501)zf-H2C2_2(524)                                                                                                                                                                                                                                            |
| Q14592 | (13)KRAB(53)~(196)zf-C2H2(218)~(210)zf-H2C2_2(234)~(224)zf-C2H2(246)~(238)zf-H2C2_2(262)~(266)zf-H2C2_2(291)~(280)zf-C2H2(302)~(323)zf-H2C2_2(346)~(350)zf-H2C2_2(375)~(381)zf-H2C2_2(402)~(407)zf-H2C2_2(431)~(435)zf-H2C2_2(457)~(462)zf-H2C2_2(486)                                                                                                                         |
| Q15653 | (55)Ank_4(78)~(98)Ank_2(234)~(207)Ank_4(261)                                                                                                                                                                                                                                                                                                                                   |
| Q14444 | (367)Caprin-1_C(681)                                                                                                                                                                                                                                                                                                                                                           |
| Q9NVX2 | (18)NLE(77)~(105)WD40(142)~(150)WD40(184)~(193)WD40(232)~(236)WD40(272)~(363)WD40(400)~(405)WD40(442)~(449)WD40(483)                                                                                                                                                                                                                                                           |
| Q8IWZ3 | (257)Ank_5(312)~(285)Ank_2(365)~(338)Ank_4(392)~(372)Ank_2(432)~(439)Ank_2(500)~(471)Ank_4(525)~(539)Ank_2(630)~(601)Ank_4(655)~(1045)Ank_2(1116)~(1122)Ank_2(1184)~(1194)Ank_2(1285)~(1296)Ank_2(1381)~(1699)KH_1(1759)                                                                                                                                                       |
| P01709 | (6)V-set(110)                                                                                                                                                                                                                                                                                                                                                                  |
| E5RG02 | (44)Trypsin(174)                                                                                                                                                                                                                                                                                                                                                               |
| Q92664 | (70)zf-C2H2(94)~(86)zf-H2C2_2(113)~(100)zf-C2H2(125)~(132)zf-C2H2(156)~(162)zf-C2H2(186)~(189)zf-C2H2(213)~(219)zf-C2H2(239)~(247)zf-C2H2(271)~(277)zf-C2H2(301)                                                                                                                                                                                                               |
| Q8N3C0 | (479)DEAD(653)~(707)Helicase_C(856)~(978)Sec63(1283)~(1329)DEAD(1494)~(1608)Helicase_C(1693)~(1812)Sec63(2175)                                                                                                                                                                                                                                                                 |
| Q04725 | (1)TLE_N(127)~(450)WD40(484)~(550)WD40(575)~(582)WD40(617)                                                                                                                                                                                                                                                                                                                     |
| Q9NUL7 | (152)DEAD(337)~(376)Helicase_C(492)                                                                                                                                                                                                                                                                                                                                            |
| Q9H6Y7 | (55)PA(150)~(229)zf-RING_2(272)                                                                                                                                                                                                                                                                                                                                                |
| P18615 | (269)RRM_1(323)                                                                                                                                                                                                                                                                                                                                                                |
| O43143 | (344)Helicase_C(476)~(539)HA2(627)~(662)OB_NTP_bind(765)                                                                                                                                                                                                                                                                                                                       |
| Q9NQZ3 | (42)RRM_1(98)~(207)RRM_1(263)~(372)RRM_1(428)                                                                                                                                                                                                                                                                                                                                  |
| Q9NP78 | (190)ABC_membrane(454)~(522)ABC_tran(671)                                                                                                                                                                                                                                                                                                                                      |
| Q86YE8 | (28)KRAB(68)~(152)zf-H2C2_2(172)~(162)zf-C2H2(184)~(177)zf-H2C2_2(200)~(205)zf-H2C2_2(227)~(235)zf-H2C2_2(256)~(260)zf-H2C2_2(285)~(274)zf-C2H2(296)~(317)zf-H2C2_2(341)~(348)zf-H2C2_2(368)~(372)zf-H2C2_2(397)~(403)zf-H2C2_2(424)~(429)zf-H2C2_2(452)~(456)zf-H2C2_2(481)~(484)zf-H2C2_2(508)~(513)zf-H2C2_2(536)~(554)zf-C2H2(576)~(597)zf-H2C2_2(621)~(624)zf-H2C2_2(648) |
| Q9NSC2 | (463)zf-H2C2_2(488)~(720)zf-H2C2_2(745)~(766)zf-C2H2(788)~(1015)zf-H2C2_2(1040)~(1029)zf-C2H2(1051)~(1148)zf-H2C2_2(1173)                                                                                                                                                                                                                                                      |
| Q96GJ1 | (343)Methyltransf_31(438)                                                                                                                                                                                                                                                                                                                                                      |

|        |                                                                                                                                                                                                                                                                                                                                                                                                                                                                              |
|--------|------------------------------------------------------------------------------------------------------------------------------------------------------------------------------------------------------------------------------------------------------------------------------------------------------------------------------------------------------------------------------------------------------------------------------------------------------------------------------|
| P63215 | (13)G-gamma(74)                                                                                                                                                                                                                                                                                                                                                                                                                                                              |
| Q14103 | (1)CBFNT(78)~(100)RRM_1(167)~(184)RRM_1(244)                                                                                                                                                                                                                                                                                                                                                                                                                                 |
| P46199 | (183)GTP_EFTU(341)~(510)IF-2(606)                                                                                                                                                                                                                                                                                                                                                                                                                                            |
| P05161 | (8)ubiquitin(75)~(87)ubiquitin(155)                                                                                                                                                                                                                                                                                                                                                                                                                                          |
| Q12872 | (35)DRY_EERY(155)~(210)Surp(254)~(459)Surp(502)                                                                                                                                                                                                                                                                                                                                                                                                                              |
| Q14671 | (849)PUF(882)~(885)PUF(914)~(921)PUF(951)~(957)PUF(984)~(993)PUF(1026)~(1029)PUF(1061)~(1064)PUF(1093)~(1112)PUF(1139)                                                                                                                                                                                                                                                                                                                                                       |
| Q9UBX7 | (54)Trypsin(275)                                                                                                                                                                                                                                                                                                                                                                                                                                                             |
| Q9ULH7 | (42)RPEL(63)~(86)RPEL(108)~(130)RPEL(151)~(390)SAP(422)                                                                                                                                                                                                                                                                                                                                                                                                                      |
| Q96JC4 | (16)KRAB(56)~(199)zf-H2C2_2(223)~(229)zf-H2C2_2(251)~(255)zf-H2C2_2(279)~(283)zf-H2C2_2(307)~(312)zf-H2C2_2(335)~(339)zf-H2C2_2(363)~(367)zf-H2C2_2(391)~(395)zf-H2C2_2(419)~(424)zf-H2C2_2(447)~(452)zf-H2C2_2(475)~(480)zf-H2C2_2(503)~(507)zf-H2C2_2(524)                                                                                                                                                                                                                 |
| Q96BV0 | (121)zf-H2C2_2(145)~(149)zf-H2C2_2(173)~(191)zf-C2H2(213)~(281)zf-C2H2(303)~(295)zf-H2C2_2(319)~(323)zf-H2C2_2(347)~(337)zf-C2H2(359)~(367)zf-C2H2(388)~(446)zf-C2H2(468)~(460)zf-H2C2_2(484)~(488)zf-H2C2_2(512)                                                                                                                                                                                                                                                            |
| Q09472 | (338)zf-TAZ(414)~(567)KIX(646)~(1068)Bromodomain(1143)~(1156)DUF902(1195)~(1306)HAT_KAT11(1609)~(1665)ZZ(1705)~(1735)zf-TAZ(1806)~(1992)Creb_binding(2098)                                                                                                                                                                                                                                                                                                                   |
| B7Z6K7 | (15)KRAB(55)~(256)zf-H2C2_2(279)~(284)zf-H2C2_2(306)~(311)zf-H2C2_2(334)~(339)zf-H2C2_2(362)~(367)zf-H2C2_2(390)~(408)zf-C2H2(430)~(423)zf-H2C2_2(447)~(438)zf-C2H2(458)~(479)zf-H2C2_2(502)~(506)zf-H2C2_2(531)~(520)zf-C2H2(542)~(534)zf-H2C2_2(559)~(548)zf-C2H2(570)~(590)zf-H2C2_2(615)~(619)zf-H2C2_2(642)~(632)zf-C2H2(654)~(646)zf-H2C2_2(671)~(688)zf-C2H2(710)~(702)zf-H2C2_2(727)~(733)zf-H2C2_2(755)~(762)zf-H2C2_2(782)~(787)zf-H2C2_2(810)~(814)zf-H2C2_2(838) |
| P48740 | (24)CUB(135)~(185)CUB(294)~(301)Sushi(362)~(367)Sushi(432)~(449)Trypsin(691)                                                                                                                                                                                                                                                                                                                                                                                                 |
| P60896 | (6)DSS1_SEM1(62)                                                                                                                                                                                                                                                                                                                                                                                                                                                             |
| Q9H7D7 | (347)WD40(382)~(392)WD40(424)~(573)WD40(598)~(605)WD40(641)                                                                                                                                                                                                                                                                                                                                                                                                                  |
| P19525 | (13)dsrm(75)~(101)dsrm(164)~(267)Pkinase(534)                                                                                                                                                                                                                                                                                                                                                                                                                                |
| Q9NSI6 | (184)WD40(214)~(219)WD40(255)~(262)WD40(301)~(361)WD40(395)~(458)WD40(497)~(1167)Bromodomain(1252)~(1322)Bromodomain(1402)                                                                                                                                                                                                                                                                                                                                                   |
| P08709 | (65)Gla(104)~(213)Trypsin(447)                                                                                                                                                                                                                                                                                                                                                                                                                                               |
| A8K979 | (38)RNase_T(224)~(595)zf-GRF(642)                                                                                                                                                                                                                                                                                                                                                                                                                                            |
| Q9NX65 | (33)SCAN(121)~(255)Myb_DNA-bind_4(338)~(522)zf-C2H2(543)~(536)zf-H2C2_2(559)~(563)zf-H2C2_2(587)~(592)zf-H2C2_2(616)~(620)zf-H2C2_2(644)~(648)zf-H2C2_2(671)                                                                                                                                                                                                                                                                                                                 |
| O15160 | (92)RNA_pol_A_bac(226)                                                                                                                                                                                                                                                                                                                                                                                                                                                       |
| Q9UG63 | (101)ABC_tran(257)~(296)ABC_tran_Xtn(368)~(413)ABC_tran(545)                                                                                                                                                                                                                                                                                                                                                                                                                 |
| Q9H9Z2 | (42)CSD(111)                                                                                                                                                                                                                                                                                                                                                                                                                                                                 |
| P55795 | (13)RRM_6(84)~(113)RRM_6(182)~(255)zf-RNPHF(290)~(291)RRM_6(358)                                                                                                                                                                                                                                                                                                                                                                                                             |
| Q9H560 | (38)Ank_2(131)~(134)Ank_2(195)~(186)Ank_5(240)                                                                                                                                                                                                                                                                                                                                                                                                                               |
| Q9GZU5 | (66)LRR_8(120)~(232)LRR_8(290)                                                                                                                                                                                                                                                                                                                                                                                                                                               |
| O95628 | (14)zf-RING_4(60)                                                                                                                                                                                                                                                                                                                                                                                                                                                            |
| Q9H0A0 | (107)DUF1726(201)~(282)Helicase_RecD(488)~(528)GNAT_acetyltr_2(752)~(771)tRNA_bind_2(892)                                                                                                                                                                                                                                                                                                                                                                                    |
| Q6ZSB9 | (15)BTB(119)~(409)zf-H2C2_2(433)~(437)zf-H2C2_2(461)~(466)zf-H2C2_2(490)~(493)zf-H2C2_2(516)~(522)zf-H2C2_2(544)~(549)zf-H2C2_2(574)                                                                                                                                                                                                                                                                                                                                         |
| Q15072 | (16)zf-C2H2(38)~(30)zf-H2C2_2(54)~(61)zf-H2C2_2(82)~(72)zf-C2H2(94)~(86)zf-H2C2_2(109)~(114)zf-H2C2_2(138)~(142)zf-H2C2_2(166)~(171)zf-H2C2_2(194)~(199)zf-H2C2_2(222)~(226)zf-H2C2_2(250)~(257)zf-H2C2_2(278)                                                                                                                                                                                                                                                               |
| P00750 | (127)Kring(208)~(215)Kring(296)~(311)Trypsin(556)                                                                                                                                                                                                                                                                                                                                                                                                                            |

|        |                                                                                                                                                                                                                                                                                                                                                                                                                                                                                                                                                                             |
|--------|-----------------------------------------------------------------------------------------------------------------------------------------------------------------------------------------------------------------------------------------------------------------------------------------------------------------------------------------------------------------------------------------------------------------------------------------------------------------------------------------------------------------------------------------------------------------------------|
| P30050 | (13)Ribosomal_L11_N(69)~(74)Ribosomal_L11(143)                                                                                                                                                                                                                                                                                                                                                                                                                                                                                                                              |
| P01775 | (12)V-set(105)                                                                                                                                                                                                                                                                                                                                                                                                                                                                                                                                                              |
| Q9P0L2 | (60)Pkinase(311)~(753)KA1(795)                                                                                                                                                                                                                                                                                                                                                                                                                                                                                                                                              |
| Q96HQ0 | (27)KRAB(67)~(203)zf-H2C2(225)~(218)zf-H2C2_2(240)~(245)zf-H2C2_2(270)~(274)zf-H2C2_2(298)~(302)zf-H2C2_2(325)~(329)zf-H2C2_2(354)~(357)zf-H2C2_2(381)~(385)zf-H2C2_2(408)~(414)zf-H2C2_2(437)~(442)zf-H2C2_2(464)~(469)zf-H2C2_2(494)                                                                                                                                                                                                                                                                                                                                      |
| P30876 | (38)RNA_pol_Rpb2_1(441)~(468)RNA_pol_Rpb2_3(532)~(567)RNA_pol_Rpb2_4(629)~(653)RNA_pol_Rpb2_5(700)~(707)RNA_pol_Rpb2_6(1080)~(1082)RNA_pol_Rpb2_7(1172)                                                                                                                                                                                                                                                                                                                                                                                                                     |
| Q8N823 | (24)KRAB(61)~(246)zf-H2C2_2(270)~(274)zf-H2C2_2(297)~(301)zf-H2C2_2(325)~(343)zf-H2C2(362)~(359)zf-H2C2_2(381)~(387)zf-H2C2_2(408)~(413)zf-H2C2_2(437)~(440)zf-H2C2_2(464)~(482)zf-H2C2(504)~(497)zf-H2C2_2(521)~(524)zf-H2C2_2(548)~(553)zf-H2C2_2(577)~(581)zf-H2C2_2(605)~(612)zf-H2C2_2(633)~(637)zf-H2C2_2(660)~(665)zf-H2C2_2(688)                                                                                                                                                                                                                                    |
| Q96NW4 | (266)VPS9(364)~(458)Ank_5(503)~(495)Ank_2(553)~(527)Ank_2(594)~(745)Ank_4(797)~(781)Ank_2(871)                                                                                                                                                                                                                                                                                                                                                                                                                                                                              |
| Q9UM47 | (43)EGF(75)~(82)EGF(115)~(123)EGF(153)~(158)EGF_CA(190)~(201)EGF(231)~(240)EGF(269)~(274)EGF_CA(307)~(318)EGF(346)~(355)EGF(385)~(391)EGF_CA(424)~(431)EGF_CA(462)~(473)EGF(503)~(511)EGF(539)~(549)EGF(578)~(586)EGF(615)~(624)EGF(652)~(661)EGF(686)~(699)EGF(728)~(738)EGF(767)~(775)EGF(806)~(810)EGF_CA(842)~(853)EGF(883)~(887)EGF_CA(917)~(928)EGF(958)~(966)EGF(995)~(1004)EGF(1031)~(1055)EGF(1080)~(1088)EGF(1118)~(1385)Notch(1418)~(1425)Notch(1458)~(1465)Notch(1500)~(1505)NOD(1559)~(1577)NODP(1636)~(1834)Ank_5(1876)~(1912)Ank_2(1998)~(2213)DUF3454(2274) |
| P01761 | (8)V-set(120)                                                                                                                                                                                                                                                                                                                                                                                                                                                                                                                                                               |
| P04431 | (28)V-set(128)                                                                                                                                                                                                                                                                                                                                                                                                                                                                                                                                                              |
| Q13487 | (1)SnAPC_2_like(330)                                                                                                                                                                                                                                                                                                                                                                                                                                                                                                                                                        |
| Q15056 | (45)RRM_1(112)                                                                                                                                                                                                                                                                                                                                                                                                                                                                                                                                                              |
| Q9H0Z9 | (36)RRM_1(93)                                                                                                                                                                                                                                                                                                                                                                                                                                                                                                                                                               |
| Q9UJQ4 | (396)zf-H2C2_2(421)~(580)zf-H2C2_2(605)~(594)zf-H2C2(616)~(626)zf-H2C2(648)~(884)zf-H2C2_2(909)                                                                                                                                                                                                                                                                                                                                                                                                                                                                             |
| Q05513 | (16)PB1(97)~(131)C1_1(182)~(254)Pkinase(518)                                                                                                                                                                                                                                                                                                                                                                                                                                                                                                                                |
| Q9HD40 | (61)SepSecS(459)                                                                                                                                                                                                                                                                                                                                                                                                                                                                                                                                                            |
| Q9NRW3 | (17)APOBEC_N(187)                                                                                                                                                                                                                                                                                                                                                                                                                                                                                                                                                           |
| Q6W2J9 | (1202)BCOR(1414)~(1467)Ank_2(1559)~(1634)PUFD(1746)                                                                                                                                                                                                                                                                                                                                                                                                                                                                                                                         |
| P11940 | (13)RRM_1(83)~(101)RRM_1(168)~(193)RRM_1(261)~(296)RRM_1(363)~(548)PABP(614)                                                                                                                                                                                                                                                                                                                                                                                                                                                                                                |
| Q9HCD6 | (894)Ank_2(972)~(996)Ank_2(1097)~(1086)Ank_5(1140)~(1137)Ank_2(1225)~(1248)TPR_2(1276)~(1303)TPR_11(1356)                                                                                                                                                                                                                                                                                                                                                                                                                                                                   |
| Q96LT7 | (61)C9orf72-like(324)                                                                                                                                                                                                                                                                                                                                                                                                                                                                                                                                                       |
| Q9H1B4 | (11)Tap-RNA_bind(93)                                                                                                                                                                                                                                                                                                                                                                                                                                                                                                                                                        |
| Q86SE5 | (23)RRM_1(85)                                                                                                                                                                                                                                                                                                                                                                                                                                                                                                                                                               |
| Q14493 | (130)SLBP_RNA_bind(199)                                                                                                                                                                                                                                                                                                                                                                                                                                                                                                                                                     |
| Q5JPF3 | (36)Ank_2(128)~(135)Ank_2(227)~(1374)CCDC144C(1665)                                                                                                                                                                                                                                                                                                                                                                                                                                                                                                                         |
| Q9WJR5 | (76)RVT_1(244)~(257)RVT_thumb(319)~(465)RNase_H(591)~(595)Integrase_Zn(632)~(649)rve(758)                                                                                                                                                                                                                                                                                                                                                                                                                                                                                   |
| P01744 | (29)V-set(145)                                                                                                                                                                                                                                                                                                                                                                                                                                                                                                                                                              |
| P62263 | (29)Ribosomal_S11(147)                                                                                                                                                                                                                                                                                                                                                                                                                                                                                                                                                      |
| Q9NYT6 | (8)KRAB(48)~(245)zf-H2C2_2(262)~(308)zf-H2C2(329)~(321)zf-H2C2_2(346)~(349)zf-H2C2_2(373)~(377)zf-H2C2_2(402)~(405)zf-H2C2_2(428)~(433)zf-H2C2_2(458)~(447)zf-H2C2(469)~(489)zf-H2C2_2(513)~(517)zf-H2C2_2(541)~(531)zf-H2C2(553)~(574)zf-H2C2_2(598)~(601)zf-H2C2_2(625)~(629)zf-H2C2_2(653)~(657)zf-H2C2_2(681)~(685)zf-H2C2_2(709)~(713)zf-H2C2_2(738)~(742)zf-H2C2_2(765)                                                                                                                                                                                               |

|        |                                                                                                                                                                                                                                                                                                                                                                                                                                   |
|--------|-----------------------------------------------------------------------------------------------------------------------------------------------------------------------------------------------------------------------------------------------------------------------------------------------------------------------------------------------------------------------------------------------------------------------------------|
| P01871 | (19)C1-set(94)~(128)C1-set(205)~(238)C1-set(314)~(338)C1-set(422)                                                                                                                                                                                                                                                                                                                                                                 |
| P62917 | (13)Ribosomal_L2(90)~(97)Ribosomal_L2_C(230)                                                                                                                                                                                                                                                                                                                                                                                      |
| P06315 | (27)V-set(109)                                                                                                                                                                                                                                                                                                                                                                                                                    |
| P61578 | (19)HERV-K_REC(105)                                                                                                                                                                                                                                                                                                                                                                                                               |
| P0DJ3  | (10)RRM_1(79)~(174)RBM1CTR(218)                                                                                                                                                                                                                                                                                                                                                                                                   |
| Q96J66 | (218)ABC_membrane(427)~(527)ABC_tran(661)~(807)ABC_membrane(1086)~(1158)ABC_tran(1306)                                                                                                                                                                                                                                                                                                                                            |
| Q9Y5Q8 | (24)Tau95(322)                                                                                                                                                                                                                                                                                                                                                                                                                    |
| P17040 | (47)SCAN(134)~(324)Myb_DNA-bind_4(408)~(484)Myb_DNA-bind_4(568)~(710)zf-C2H2(732)~(727)zf-H2C2_2(748)~(752)zf-H2C2_2(776)~(794)zf-C2H2(816)~(875)zf-C2H2(897)~(890)zf-H2C2_2(913)~(918)zf-H2C2_2(941)~(948)zf-H2C2_2(968)~(973)zf-H2C2_2(997)~(1003)zf-H2C2_2(1026)                                                                                                                                                               |
| Q8TDG4 | (346)DEAD(505)~(566)Helicase_C(712)                                                                                                                                                                                                                                                                                                                                                                                               |
| Q9NXZ2 | (75)KH_1(128)~(266)DEAD(436)~(472)Helicase_C(582)                                                                                                                                                                                                                                                                                                                                                                                 |
| P0CG05 | (14)C1-set(95)                                                                                                                                                                                                                                                                                                                                                                                                                    |
| Q8TE02 | (25)Elong_Iki1(197)~(249)Elong_Iki1(297)                                                                                                                                                                                                                                                                                                                                                                                          |
| Q9NP64 | (17)S1(85)                                                                                                                                                                                                                                                                                                                                                                                                                        |
| Q99613 | (31)eIF-3c_N(705)~(713)PCI(846)                                                                                                                                                                                                                                                                                                                                                                                                   |
| Q8WTQ7 | (55)RGS(175)~(192)Pkinase(443)                                                                                                                                                                                                                                                                                                                                                                                                    |
| Q99547 | (8)MPP6(135)                                                                                                                                                                                                                                                                                                                                                                                                                      |
| Q9NUK0 | (18)zf-CCCH(41)~(60)zf-CCCH(73)~(176)zf-CCCH(200)~(214)zf-CCCH(235)                                                                                                                                                                                                                                                                                                                                                               |
| Q00653 | (40)RHD_DNA_bind(220)~(229)RHD_dimer(327)~(473)Ank_4(505)~(531)Ank_2(628)~(605)Ank_2(698)                                                                                                                                                                                                                                                                                                                                         |
| Q8NCW5 | (81)YjeF_N(246)                                                                                                                                                                                                                                                                                                                                                                                                                   |
| Q7RTY9 | (57)Trypsin(292)                                                                                                                                                                                                                                                                                                                                                                                                                  |
| Q96LT9 | (29)RRM_1(95)~(422)RRM_1(496)                                                                                                                                                                                                                                                                                                                                                                                                     |
| Q9NW08 | (38)RNA_pol_Rpb2_1(412)~(438)RNA_pol_Rpb2_3(502)~(539)RNA_pol_Rpb2_4(600)~(621)RNA_pol_Rpb2_5(661)~(668)RNA_pol_Rpb2_6(1041)~(1043)RNA_pol_Rpb2_7(1127)                                                                                                                                                                                                                                                                           |
| Q66PJ3 | (191)SR-25(419)                                                                                                                                                                                                                                                                                                                                                                                                                   |
| Q9NX20 | (65)Ribosomal_L16(190)                                                                                                                                                                                                                                                                                                                                                                                                            |
| P78406 | (85)WD40(114)~(125)WD40(157)~(256)WD40(301)                                                                                                                                                                                                                                                                                                                                                                                       |
| Q01780 | (44)PMC2NT(133)~(289)DNA_pol_A_exo1(455)~(506)HRDC(571)                                                                                                                                                                                                                                                                                                                                                                           |
| P15622 | (22)KRAB(62)~(199)zf-C2H2(221)~(213)zf-H2C2_2(237)~(242)zf-H2C2_2(264)~(270)zf-H2C2_2(294)~(298)zf-H2C2_2(322)~(326)zf-H2C2_2(349)~(354)zf-H2C2_2(377)~(384)zf-H2C2_2(406)~(410)zf-H2C2_2(433)~(438)zf-H2C2_2(461)~(466)zf-H2C2_2(489)~(496)zf-H2C2_2(517)~(523)zf-H2C2_2(545)                                                                                                                                                    |
| P51817 | (51)Pkinase(303)                                                                                                                                                                                                                                                                                                                                                                                                                  |
| O14746 | (460)Telomerase_RBD(591)~(700)RVT_1(748)~(817)RVT_1(905)                                                                                                                                                                                                                                                                                                                                                                          |
| P24941 | (4)Pkinase(286)                                                                                                                                                                                                                                                                                                                                                                                                                   |
| Q4V348 | (159)zf-H2C2_2(181)~(200)zf-C2H2(222)~(264)zf-H2C2_2(288)~(292)zf-H2C2_2(317)~(320)zf-H2C2_2(345)~(348)zf-H2C2_2(373)~(376)zf-H2C2_2(401)~(405)zf-H2C2_2(429)~(432)zf-H2C2_2(457)~(460)zf-H2C2_2(485)~(488)zf-H2C2_2(511)~(517)zf-H2C2_2(540)~(545)zf-H2C2_2(569)~(573)zf-H2C2_2(596)~(604)zf-H2C2_2(624)~(628)zf-H2C2_2(652)~(656)zf-H2C2_2(680)~(686)zf-H2C2_2(709)~(713)zf-H2C2_2(736)~(740)zf-H2C2_2(764)~(769)zf-H2C2_2(792) |
| Q6Q0C0 | (387)WD40(424)~(430)WD40(465)~(470)WD40(504)~(520)WD40(545)~(590)WD40(629)~(635)WD40(668)                                                                                                                                                                                                                                                                                                                                         |
| Q86V86 | (40)Pkinase(293)                                                                                                                                                                                                                                                                                                                                                                                                                  |
| P62995 | (122)RRM_1(190)                                                                                                                                                                                                                                                                                                                                                                                                                   |

|        |                                                                                                                                                                                                                                                                                                                                                                                                                                             |
|--------|---------------------------------------------------------------------------------------------------------------------------------------------------------------------------------------------------------------------------------------------------------------------------------------------------------------------------------------------------------------------------------------------------------------------------------------------|
| P17036 | (51)KRAB(91)~(200)zf-C2H2(222)~(215)zf-H2C2_2(238)~(243)zf-H2C2_2(266)~(273)zf-H2C2_2(294)~(299)zf-H2C2_2(323)~(330)zf-H2C2_2(350)~(354)zf-H2C2_2(379)~(383)zf-H2C2_2(406)~(396)zf-C2H2(418)                                                                                                                                                                                                                                                |
| P06314 | (26)V-set(132)                                                                                                                                                                                                                                                                                                                                                                                                                              |
| P56192 | (266)tRNA-synt_1g(657)~(845)WHEP-TRS(895)                                                                                                                                                                                                                                                                                                                                                                                                   |
| Q8N895 | (254)zf-C2H2(275)~(267)zf-H2C2_2(292)~(309)zf-C2H2(331)~(323)zf-H2C2_2(348)~(380)zf-H2C2_2(402)~(393)zf-C2H2(415)~(421)zf-C2H2(443)~(463)zf-H2C2_2(487)~(477)zf-C2H2(499)~(492)zf-H2C2_2(515)~(505)zf-C2H2_6(529)~(533)zf-C2H2(556)                                                                                                                                                                                                         |
| Q07617 | (212)TPR_11(273)~(255)TPR_9(314)~(447)TPR_11(518)~(524)TPR_1(551)~(624)TPR_11(687)~(691)TPR_1(723)~(802)RPAP3_C(894)                                                                                                                                                                                                                                                                                                                        |
| Q8WTT2 | (214)NOC3p(308)~(555)CBF(708)                                                                                                                                                                                                                                                                                                                                                                                                               |
| Q14872 | (140)zf-C2H2(164)~(186)zf-H2C2_2(213)~(229)zf-C2H2(253)~(245)zf-H2C2_2(271)~(275)zf-H2C2_2(302)                                                                                                                                                                                                                                                                                                                                             |
| A6NCQ9 | (13)zf-RING_2(65)                                                                                                                                                                                                                                                                                                                                                                                                                           |
| Q9BZI7 | (51)Smg4_UPF3(208)                                                                                                                                                                                                                                                                                                                                                                                                                          |
| Q9Y4E6 | (19)WD40(47)~(62)WD40(95)~(457)WD40(498)~(551)WD40(587)~(1386)WD40(1422)                                                                                                                                                                                                                                                                                                                                                                    |
| P19784 | (40)Pkinase(325)                                                                                                                                                                                                                                                                                                                                                                                                                            |
| Q14197 | (68)RF-1(200)                                                                                                                                                                                                                                                                                                                                                                                                                               |
| Q14585 | (52)zf-H2C2_2(72)~(77)zf-H2C2_2(100)~(104)zf-H2C2_2(128)~(132)zf-H2C2_2(156)~(161)zf-H2C2_2(184)~(189)zf-H2C2_2(212)~(216)zf-H2C2_2(240)~(244)zf-H2C2_2(268)~(272)zf-H2C2_2(296)~(300)zf-H2C2_2(324)~(331)zf-H2C2_2(353)~(356)zf-H2C2_2(380)~(387)zf-H2C2_2(409)~(412)zf-H2C2_2(437)~(440)zf-H2C2_2(464)                                                                                                                                    |
| Q5EBL2 | (51)zf-H2C2_2(74)~(78)zf-H2C2_2(103)~(92)zf-C2H2(114)~(134)zf-H2C2_2(159)~(162)zf-H2C2_2(186)~(190)zf-H2C2_2(215)~(356)zf-C2H2_4(378)~(454)zf-C2H2(476)~(468)zf-H2C2_2(493)~(482)zf-C2H2(504)~(524)zf-H2C2_2(549)~(553)zf-H2C2_2(576)~(580)zf-H2C2_2(605)~(608)zf-H2C2_2(632)                                                                                                                                                               |
| P17252 | (37)C1_1(87)~(102)C1_1(153)~(172)C2(277)~(341)Pkinase(583)                                                                                                                                                                                                                                                                                                                                                                                  |
| P54198 | (10)WD40(44)~(68)WD40(98)~(121)WD40(159)~(167)WD40(201)~(763)Hira(962)                                                                                                                                                                                                                                                                                                                                                                      |
| Q9BY66 | (15)JmjN(48)~(82)ARID(165)~(316)PHD(362)~(491)JmjC(607)~(697)zf-C5HC2(749)~(762)PLU-1(1087)~(1174)PHD(1236)~(1237)PLU-1(1289)                                                                                                                                                                                                                                                                                                               |
| A1L453 | (60)Trypsin(288)                                                                                                                                                                                                                                                                                                                                                                                                                            |
| Q8NG66 | (29)Pkinase(287)                                                                                                                                                                                                                                                                                                                                                                                                                            |
| P00734 | (48)Gla(88)~(108)Kringle(186)~(213)Kringle(291)~(317)Thrombin_light(363)~(364)Trypsin(613)                                                                                                                                                                                                                                                                                                                                                  |
| Q9UJJ7 | (18)PseudoU_synth_2(182)                                                                                                                                                                                                                                                                                                                                                                                                                    |
| O14733 | (122)Pkinase(380)                                                                                                                                                                                                                                                                                                                                                                                                                           |
| Q6ZN19 | (149)zf-C2H2(167)~(201)zf-C2H2(223)~(215)zf-H2C2_2(239)~(229)zf-C2H2(251)~(272)zf-H2C2_2(296)~(285)zf-C2H2(307)~(328)zf-H2C2_2(350)~(359)zf-H2C2_2(379)~(383)zf-H2C2_2(406)~(412)zf-H2C2_2(436)~(440)zf-H2C2_2(464)~(468)zf-H2C2_2(490)~(495)zf-H2C2_2(520)~(524)zf-H2C2_2(547)~(537)zf-C2H2(559)~(593)zf-C2H2(615)~(607)zf-H2C2_2(631)~(636)zf-H2C2_2(659)~(664)zf-H2C2_2(686)~(692)zf-H2C2_2(714)~(719)zf-H2C2_2(743)~(748)zf-H2C2_2(770) |
| Q86Z02 | (190)Pkinase(518)                                                                                                                                                                                                                                                                                                                                                                                                                           |
| Q96NJ6 | (141)zf-C2H2(163)~(156)zf-H2C2_2(180)~(183)zf-H2C2_2(206)~(214)zf-H2C2_2(235)~(242)zf-H2C2_2(262)~(253)zf-C2H2(275)~(281)zf-C2H2(303)~(296)zf-H2C2_2(319)~(324)zf-H2C2_2(347)~(354)zf-H2C2_2(374)~(380)zf-H2C2_2(403)~(408)zf-H2C2_2(431)~(436)zf-H2C2_2(459)~(466)zf-H2C2_2(488)                                                                                                                                                           |
| Q9NVU0 | (5)Sin_N(431)                                                                                                                                                                                                                                                                                                                                                                                                                               |
| Q9BZL4 | (58)Ank_2(164)~(229)Ank_4(279)~(683)PRKG1_interact(782)                                                                                                                                                                                                                                                                                                                                                                                     |
| P82912 | (85)Ribosomal_S11(192)                                                                                                                                                                                                                                                                                                                                                                                                                      |
| Q9NYK1 | (66)LRR_8(100)~(118)LRR_8(139)~(148)LRR_8(183)~(194)LRR_8(219)~(226)LRR_8(259)~(275)LRR_8(324)~(280)LRR_5(335)~(391)LRR_8(433)~(496)LRR_8(554)~(645)LRR_                                                                                                                                                                                                                                                                                    |

|         |                                                                                                                                                                                                                                                                                                                                                                                                       |
|---------|-------------------------------------------------------------------------------------------------------------------------------------------------------------------------------------------------------------------------------------------------------------------------------------------------------------------------------------------------------------------------------------------------------|
|         | 5(768)~(675)LRR_8(735)~(892)TIR(1033)                                                                                                                                                                                                                                                                                                                                                                 |
| O60583  | (12)Cyclin_N(147)~(186)Cyclin_N(216)                                                                                                                                                                                                                                                                                                                                                                  |
| Q14593  | (37)KRAB(77)~(194)zf-H2C2_2(214)~(234)zf-C2H2(256)~(248)zf-H2C2_2(272)~(277)zf-H2C2_2(300)~(305)zf-H2C2_2(328)~(333)zf-H2C2_2(355)~(361)zf-H2C2_2(384)~(389)zf-H2C2_2(413)~(417)zf-H2C2_2(440)~(445)zf-H2C2_2(467)~(473)zf-H2C2_2(495)~(501)zf-H2C2_2(524)~(514)zf-C2H2(536)                                                                                                                          |
| Q8W XK1 | (113)Ank_4(164)~(143)Ank_2(207)~(177)Ank_4(229)~(196)Ank_5(247)~(245)Ank_4(296)~(312)Ank_2(407)~(534)SOCS_box(575)                                                                                                                                                                                                                                                                                    |
| Q9BYD3  | (81)Ribosomal_L4(271)                                                                                                                                                                                                                                                                                                                                                                                 |
| A6NHQ2  | (100)Fibrillarin(326)                                                                                                                                                                                                                                                                                                                                                                                 |
| Q92772  | (4)Pkinase(287)                                                                                                                                                                                                                                                                                                                                                                                       |
| Q8NEP9  | (4)KRAB(44)~(165)zf-H2C2_2(182)~(186)zf-H2C2_2(209)~(214)zf-H2C2_2(237)~(242)zf-H2C2_2(267)~(271)zf-H2C2_2(295)~(299)zf-H2C2_2(323)~(326)zf-H2C2_2(349)~(355)zf-H2C2_2(377)~(383)zf-H2C2_2(407)~(411)zf-H2C2_2(433)~(438)zf-H2C2_2(462)~(467)zf-H2C2_2(490)~(494)zf-H2C2_2(518)~(523)zf-H2C2_2(546)~(554)zf-H2C2_2(574)~(564)zf-C2H2_4(586)                                                           |
| Q6PKG0  | (407)La(462)                                                                                                                                                                                                                                                                                                                                                                                          |
| Q7Z7L9  | (69)SCAN(133)~(222)zf-C2H2(244)~(237)zf-H2C2_2(260)~(264)zf-H2C2_2(289)~(292)zf-H2C2_2(317)~(320)zf-H2C2_2(345)~(348)zf-H2C2_2(373)~(376)zf-H2C2_2(400)~(405)zf-H2C2_2(429)~(432)zf-H2C2_2(456)~(446)zf-C2H2(468)~(488)zf-H2C2_2(512)~(517)zf-H2C2_2(541)~(545)zf-H2C2_2(568)~(575)zf-H2C2_2(597)                                                                                                     |
| Q14588  | (8)KRAB(48)~(141)zf-H2C2_2(158)~(163)zf-H2C2_2(185)~(204)zf-C2H2(226)~(218)zf-H2C2_2(243)~(247)zf-H2C2_2(270)~(274)zf-H2C2_2(298)~(302)zf-H2C2_2(326)~(330)zf-H2C2_2(353)~(359)zf-H2C2_2(381)~(387)zf-H2C2_2(409)~(414)zf-H2C2_2(438)~(443)zf-H2C2_2(466)~(471)zf-H2C2_2(495)~(498)zf-H2C2_2(522)~(526)zf-H2C2_2(551)~(554)zf-H2C2_2(578)~(582)zf-H2C2_2(606)~(610)zf-H2C2_2(635)~(639)zf-H2C2_2(662) |
| Q8IWQ3  | (19)Pkinase(269)                                                                                                                                                                                                                                                                                                                                                                                      |
| Q9H2X6  | (199)Pkinase(527)                                                                                                                                                                                                                                                                                                                                                                                     |
| Q13542  | (10)eIF_4EBP(120)                                                                                                                                                                                                                                                                                                                                                                                     |
| Q96EP5  | (12)RRM_1(69)~(115)RRM_1(183)                                                                                                                                                                                                                                                                                                                                                                         |
| A6NK53  | (8)KRAB(48)~(442)zf-H2C2_2(462)~(466)zf-H2C2_2(491)~(494)zf-H2C2_2(518)~(522)zf-H2C2_2(546)~(550)zf-H2C2_2(574)~(578)zf-H2C2_2(601)~(610)zf-H2C2_2(630)~(634)zf-H2C2_2(658)                                                                                                                                                                                                                           |
| Q96GE5  | (4)KRAB(44)~(155)zf-H2C2_2(180)~(183)zf-H2C2_2(206)~(215)zf-H2C2_2(235)~(240)zf-H2C2_2(262)~(269)zf-H2C2_2(291)~(295)zf-H2C2_2(320)~(324)zf-H2C2_2(347)~(351)zf-H2C2_2(373)~(380)zf-H2C2_2(404)~(408)zf-H2C2_2(430)~(435)zf-H2C2_2(457)~(463)zf-H2C2_2(486)~(491)zf-H2C2_2(515)~(518)zf-H2C2_2(542)~(548)zf-H2C2_2(571)~(576)zf-H2C2_2(598)~(588)zf-C2H2_6(613)~(621)zf-C2H2_6(643)                   |
| Q9UQ88  | (429)Pkinase(711)                                                                                                                                                                                                                                                                                                                                                                                     |
| P41743  | (26)PB1(107)~(141)C1_1(192)~(256)Pkinase(522)                                                                                                                                                                                                                                                                                                                                                         |
| Q96GD4  | (77)Pkinase(327)                                                                                                                                                                                                                                                                                                                                                                                      |
| Q14152  | (366)PCI(494)                                                                                                                                                                                                                                                                                                                                                                                         |
| P63122  | (7)RVP(105)~(112)G-patch(154)                                                                                                                                                                                                                                                                                                                                                                         |
| P05981  | (50)Hepsin-SRCR(159)~(163)Trypsin(400)                                                                                                                                                                                                                                                                                                                                                                |
| Q8N967  | (92)LRR_8(152)~(166)LRR_4(198)                                                                                                                                                                                                                                                                                                                                                                        |
| Q3SY69  | (24)Formyl_trans_N(202)~(227)Formyl_trans_C(328)~(452)Aldedh(919)                                                                                                                                                                                                                                                                                                                                     |
| Q32M78  | (19)KRAB(59)~(153)zf-H2C2_2(167)~(209)zf-H2C2_2(232)~(239)zf-H2C2_2(261)~(266)zf-H2C2_2(289)~(293)zf-H2C2_2(317)~(321)zf-H2C2_2(346)~(350)zf-H2C2_2(373)~(378)zf-H2C2_2(401)~(405)zf-H2C2_2(429)~(433)zf-H2C2_2(457)~(462)zf-H2C2_2(486)~(475)zf-C2H2(497)~(489)zf-H2C2_2(512)~(517)zf-H2C2_2(540)~(545)zf-H2C2_2(570)~(574)zf-H2C2_2(597)~(602)zf-H2C2_2(625)                                        |
| Q9NRL3  | (65)Striatin(193)~(429)WD40(466)~(537)WD40(572)~(669)WD40(707)~(712)WD40(750)                                                                                                                                                                                                                                                                                                                         |
| Q5TAQ9  | (185)WD40(221)~(425)WD40(462)~(475)WD40(505)                                                                                                                                                                                                                                                                                                                                                          |

|        |                                                                                                                                                                                                                                                                                                                                                                                   |
|--------|-----------------------------------------------------------------------------------------------------------------------------------------------------------------------------------------------------------------------------------------------------------------------------------------------------------------------------------------------------------------------------------|
| P01706 | (5)V-set(110)                                                                                                                                                                                                                                                                                                                                                                     |
| Q96KV7 | (3)DUF667(185)~(698)WD40(728)~(1430)WD40(1462)                                                                                                                                                                                                                                                                                                                                    |
| Q13641 | (93)LRR_8(154)~(211)LRR_8(270)                                                                                                                                                                                                                                                                                                                                                    |
| P09651 | (16)RRM_1(82)~(107)RRM_1(167)                                                                                                                                                                                                                                                                                                                                                     |
| P01773 | (12)V-set(117)                                                                                                                                                                                                                                                                                                                                                                    |
| P80362 | (6)V-set(106)                                                                                                                                                                                                                                                                                                                                                                     |
| P01616 | (6)V-set(110)                                                                                                                                                                                                                                                                                                                                                                     |
| Q02156 | (7)C2(116)~(170)C1_1(221)~(243)C1_1(294)~(409)Pkinase(668)                                                                                                                                                                                                                                                                                                                        |
| P49591 | (2)Seryl_tRNA_N(102)~(259)tRNA-synt_2b(444)                                                                                                                                                                                                                                                                                                                                       |
| P04207 | (26)V-set(127)                                                                                                                                                                                                                                                                                                                                                                    |
| Q04756 | (108)fn2(148)~(286)Kring(367)~(408)Trypsin(641)                                                                                                                                                                                                                                                                                                                                   |
| O43240 | (49)Trypsin(269)                                                                                                                                                                                                                                                                                                                                                                  |
| Q8TF45 | (5)KRAB(45)~(246)zf-H2C2_2(269)~(272)zf-H2C2_2(297)~(300)zf-H2C2_2(324)~(329)zf-H2C2_2(352)~(356)zf-H2C2_2(380)~(385)zf-H2C2_2(409)~(412)zf-H2C2_2(437)~(426)zf-C2H2(448)~(469)zf-H2C2_2(491)~(497)zf-H2C2_2(519)~(524)zf-H2C2_2(548)~(552)zf-H2C2_2(577)~(577)zf-H2C2_2(602)~(608)zf-H2C2_2(629)~(633)zf-H2C2_2(657)                                                             |
| Q4U2R6 | (39)MRP-L51(126)                                                                                                                                                                                                                                                                                                                                                                  |
| Q86XN6 | (8)KRAB(48)~(230)zf-H2C2_2(252)~(256)zf-H2C2_2(280)~(284)zf-H2C2_2(307)~(313)zf-H2C2_2(336)~(341)zf-H2C2_2(365)~(368)zf-H2C2_2(393)~(396)zf-H2C2_2(420)~(424)zf-H2C2_2(449)~(452)zf-H2C2_2(475)~(480)zf-H2C2_2(505)~(509)zf-H2C2_2(532)~(536)zf-H2C2_2(560)~(550)zf-C2H2(572)~(592)zf-H2C2_2(617)~(620)zf-H2C2_2(643)~(648)zf-H2C2_2(673)~(678)zf-H2C2_2(700)~(707)zf-H2C2_2(728) |
| P01718 | (4)V-set(105)                                                                                                                                                                                                                                                                                                                                                                     |
| Q9Y2P8 | (10)RTC(341)                                                                                                                                                                                                                                                                                                                                                                      |
| P98179 | (8)RRM_1(78)                                                                                                                                                                                                                                                                                                                                                                      |
| Q9NP81 | (292)tRNA-synt_2b(468)                                                                                                                                                                                                                                                                                                                                                            |
| Q9H9G7 | (20)ArgoN(167)~(177)ArgoL1(227)~(240)PAZ(366)~(376)ArgoL2(421)~(430)ArgoMid(511)~(518)Piwi(818)                                                                                                                                                                                                                                                                                   |
| O95409 | (320)zf-H2C2_2(345)~(349)zf-H2C2_2(376)~(393)zf-C2H2(415)                                                                                                                                                                                                                                                                                                                         |
| Q9Y324 | (92)Fcf1(188)                                                                                                                                                                                                                                                                                                                                                                     |
| P06317 | (5)V-set(110)                                                                                                                                                                                                                                                                                                                                                                     |
| P46783 | (3)S10_plectin(97)                                                                                                                                                                                                                                                                                                                                                                |
| Q13283 | (11)NTF2(133)~(342)RRM_1(396)                                                                                                                                                                                                                                                                                                                                                     |
| Q86UE6 | (60)LRR_8(101)~(113)LRR_8(173)~(199)LRR_5(319)~(257)LRR_8(314)                                                                                                                                                                                                                                                                                                                    |
| Q96NG8 | (8)KRAB(46)~(188)zf-H2C2_2(210)~(216)zf-H2C2_2(237)~(244)zf-H2C2_2(266)~(271)zf-H2C2_2(293)~(297)zf-H2C2_2(322)~(339)zf-C2H2(361)~(354)zf-H2C2_2(376)~(382)zf-H2C2_2(406)~(409)zf-H2C2_2(434)~(423)zf-C2H2(445)                                                                                                                                                                   |
| Q96RR4 | (165)Pkinase(446)                                                                                                                                                                                                                                                                                                                                                                 |
| P98168 | (267)zf-C2H2(291)~(300)zf-C2H2(324)~(332)zf-C2H2(354)~(332)zf-C2H2_8(410)~(346)zf-H2C2_2(370)~(437)zf-H2C2_2(458)~(480)zf-C2H2(504)~(512)zf-C2H2_aberr(584)                                                                                                                                                                                                                       |
| Q14562 | (261)S1(333)~(771)Helicase_C(895)~(957)HA2(1045)~(1098)OB_NTP_bind(1179)                                                                                                                                                                                                                                                                                                          |
| E7EML9 | (97)Trypsin(327)                                                                                                                                                                                                                                                                                                                                                                  |
| Q5JTN6 | (15)WD40(48)~(53)WD40(91)~(96)WD40(133)~(138)WD40(175)~(188)WD40(219)~(226)WD40(261)~(265)WD40(298)                                                                                                                                                                                                                                                                               |
| Q7LBC6 | (1599)JmjC(1704)                                                                                                                                                                                                                                                                                                                                                                  |
| Q9P0M2 | (85)AKAP7_NLS(281)~(289)AKAP7_RIRII_bdg(346)                                                                                                                                                                                                                                                                                                                                      |
| Q9GZT3 | (22)RRM_1(83)                                                                                                                                                                                                                                                                                                                                                                     |

|        |                                                                                                                                                                                                                                                                                                                                                                                                                            |
|--------|----------------------------------------------------------------------------------------------------------------------------------------------------------------------------------------------------------------------------------------------------------------------------------------------------------------------------------------------------------------------------------------------------------------------------|
| Q96DP5 | (118)Formyl_trans_N(220)~(243)Formyl_trans_C(349)                                                                                                                                                                                                                                                                                                                                                                          |
| Q96FX7 | (64)GCD14(286)                                                                                                                                                                                                                                                                                                                                                                                                             |
| Q8NEV4 | (22)Pkinase(287)~(340)Myosin_head(1041)~(1060)IQ(1076)~(1084)IQ(1101)~(1348)IQ(1367)                                                                                                                                                                                                                                                                                                                                       |
| P12018 | (25)V-set(127)                                                                                                                                                                                                                                                                                                                                                                                                             |
| P51522 | (121)zf-C2H2(143)~(135)zf-H2C2_2(160)~(163)zf-H2C2_2(187)~(191)zf-H2C2_2(215)~(219)zf-H2C2_2(244)~(248)zf-H2C2_2(272)~(275)zf-H2C2_2(300)~(304)zf-H2C2_2(328)~(332)zf-H2C2_2(356)~(360)zf-H2C2_2(383)~(387)zf-H2C2_2(411)~(401)zf-C2H2(423)~(416)zf-H2C2_2(438)~(445)zf-H2C2_2(467)~(485)zf-C2H2(507)                                                                                                                      |
| Q6UY18 | (65)LRR_8(120)~(112)LRR_8(168)~(253)LRR_8(309)~(312)LRR_8(360)~(420)I-set(501)                                                                                                                                                                                                                                                                                                                                             |
| Q02779 | (23)SH3_9(77)~(98)Pkinase_Tyr(357)                                                                                                                                                                                                                                                                                                                                                                                         |
| Q96MU7 | (355)YTH(492)                                                                                                                                                                                                                                                                                                                                                                                                              |
| O15234 | (143)Btz(247)                                                                                                                                                                                                                                                                                                                                                                                                              |
| P59768 | (8)G-gamma(71)                                                                                                                                                                                                                                                                                                                                                                                                             |
| Q9UK08 | (12)G-gamma(69)                                                                                                                                                                                                                                                                                                                                                                                                            |
| Q13043 | (31)Pkinase(281)~(433)Mst1_SARAH(480)                                                                                                                                                                                                                                                                                                                                                                                      |
| Q9H0M5 | (24)KRAB(64)~(186)zf-H2C2_2(203)~(210)zf-H2C2_2(232)~(239)zf-H2C2_2(261)~(265)zf-H2C2_2(288)~(295)zf-H2C2_2(317)~(306)zf-C2H2(328)~(349)zf-H2C2_2(372)~(377)zf-H2C2_2(399)~(405)zf-H2C2_2(428)~(433)zf-H2C2_2(456)~(460)zf-H2C2_2(484)~(488)zf-H2C2_2(518)~(523)zf-H2C2_2(545)~(550)zf-H2C2_2(574)~(578)zf-H2C2_2(602)~(606)zf-H2C2_2(630)~(634)zf-H2C2_2(657)~(663)zf-H2C2_2(686)~(691)zf-H2C2_2(715)~(722)zf-H2C2_2(742) |
| O43395 | (9)PWI(77)~(308)PRP3(521)~(545)DUF1115(673)                                                                                                                                                                                                                                                                                                                                                                                |
| Q14680 | (11)Pkinase(263)~(609)KA1(650)                                                                                                                                                                                                                                                                                                                                                                                             |
| Q96I25 | (237)G-patch(276)                                                                                                                                                                                                                                                                                                                                                                                                          |
| P51786 | (27)KRAB(67)~(176)zf-H2C2_2(200)~(207)zf-H2C2_2(228)~(236)zf-H2C2_2(256)~(261)zf-H2C2_2(283)~(288)zf-H2C2_2(311)~(316)zf-H2C2_2(339)~(345)zf-H2C2_2(367)~(375)zf-H2C2_2(396)~(401)zf-H2C2_2(424)~(432)zf-H2C2_2(452)~(457)zf-H2C2_2(479)                                                                                                                                                                                   |
| Q9Y6Q3 | (43)KRAB(72)~(310)zf-H2C2_2(331)~(335)zf-H2C2_2(357)~(363)zf-H2C2_2(388)~(391)zf-H2C2_2(415)~(419)zf-H2C2_2(444)~(447)zf-H2C2_2(471)~(476)zf-H2C2_2(500)~(503)zf-H2C2_2(528)~(532)zf-H2C2_2(555)~(560)zf-H2C2_2(583)~(588)zf-H2C2_2(612)                                                                                                                                                                                   |
| Q9NRM7 | (669)Pkinase(818)~(864)Pkinase(973)                                                                                                                                                                                                                                                                                                                                                                                        |
| P63218 | (7)G-gamma(67)                                                                                                                                                                                                                                                                                                                                                                                                             |
| Q9NQX1 | (167)zf-C2H2_4(190)~(199)zf-C2H2(218)~(234)zf-met(252)~(262)zf-C2H2(287)~(296)zf-met(313)~(335)zf-H2C2_2(359)~(376)zf-C2H2_jaz(398)~(418)zf-H2C2_2(443)~(432)zf-C2H2(455)~(476)zf-H2C2_2(499)~(504)zf-H2C2_2(527)~(532)zf-H2C2_2(555)~(560)zf-H2C2_2(583)~(603)zf-C2H2(625)                                                                                                                                                |
| Q96NS5 | (115)Ank_2(205)~(195)Ank_5(250)~(270)Ank_5(324)                                                                                                                                                                                                                                                                                                                                                                            |
| P58317 | (144)zf-C2H2(166)~(159)zf-H2C2_2(182)~(186)zf-H2C2_2(210)~(215)zf-H2C2_2(238)~(243)zf-H2C2_2(266)~(271)zf-H2C2_2(294)~(301)zf-H2C2_2(323)~(328)zf-H2C2_2(349)~(354)zf-H2C2_2(378)                                                                                                                                                                                                                                          |
| P61313 | (2)Ribosomal_L15e(190)                                                                                                                                                                                                                                                                                                                                                                                                     |
| P52701 | (90)PWWP(182)~(407)MutS_I(524)~(538)MutS_II(699)~(739)MutS_III(1064)~(1075)MutS_V(1325)                                                                                                                                                                                                                                                                                                                                    |
| Q86WV6 | (45)TMEM173(337)                                                                                                                                                                                                                                                                                                                                                                                                           |
| Q9Y3M9 | (13)KRAB(52)~(223)zf-H2C2_2(246)~(250)zf-H2C2_2(274)~(279)zf-H2C2_2(302)~(307)zf-H2C2_2(331)~(348)zf-C2H2(370)~(390)zf-H2C2_2(414)~(419)zf-H2C2_2(441)~(460)zf-C2H2(482)~(503)zf-H2C2_2(526)~(530)zf-H2C2_2(554)~(558)zf-H2C2_2(581)~(587)zf-H2C2_2(609)~(614)zf-H2C2_2(637)~(642)zf-H2C2_2(666)~(670)zf-H2C2_2(695)~(699)zf-H2C2_2(724)                                                                                   |
| O95319 | (43)RRM_1(111)~(134)RRM_1(198)~(425)RRM_1(495)                                                                                                                                                                                                                                                                                                                                                                             |



|        |                                                                                                                                                                                                                                                                                                                                                                                                                         |
|--------|-------------------------------------------------------------------------------------------------------------------------------------------------------------------------------------------------------------------------------------------------------------------------------------------------------------------------------------------------------------------------------------------------------------------------|
| Q13064 | (97)Torus(124)~(241)Torus(262)~(392)Torus(424)~(436)MKRN1_C(505)                                                                                                                                                                                                                                                                                                                                                        |
| Q9H9V4 | (92)zf-RING_2(133)                                                                                                                                                                                                                                                                                                                                                                                                      |
| Q8IWT0 | (31)Archease(167)                                                                                                                                                                                                                                                                                                                                                                                                       |
| O14757 | (11)Pkinase(264)                                                                                                                                                                                                                                                                                                                                                                                                        |
| Q96T76 | (50)MMS19_N(311)~(543)MMS19_C(962)                                                                                                                                                                                                                                                                                                                                                                                      |
| P41229 | (15)JmjN(48)~(82)ARID(165)~(326)PHD(372)~(501)JmjC(617)~(707)zf-C5HC2(759)~(772)PLU-1(1100)~(1187)PHD(1249)~(1250)PLU-1(1299)                                                                                                                                                                                                                                                                                           |
| P43034 | (104)WD40(136)~(141)WD40(178)~(183)WD40(219)~(224)WD40(261)~(267)WD40(324)~(329)WD40(366)~(371)WD40(407)                                                                                                                                                                                                                                                                                                                |
| Q8IY67 | (61)RRM_1(123)~(134)RRM_1(203)~(251)RRM_1(292)                                                                                                                                                                                                                                                                                                                                                                          |
| Q8TAQ5 | (6)KRAB(46)~(139)zf-C2H2(161)~(153)zf-H2C2_2(178)~(182)zf-H2C2_2(206)~(213)zf-H2C2_2(232)~(238)zf-H2C2_2(262)~(266)zf-H2C2_2(289)~(297)zf-H2C2_2(316)~(322)zf-H2C2_2(344)~(350)zf-H2C2_2(372)~(378)zf-H2C2_2(402)~(406)zf-H2C2_2(429)~(434)zf-H2C2_2(458)~(462)zf-H2C2_2(484)~(490)zf-H2C2_2(513)~(517)zf-H2C2_2(541)~(548)zf-H2C2_2(568)~(574)zf-H2C2_2(598)~(602)zf-H2C2_2(626)~(629)zf-H2C2_2(654)~(643)zf-C2H2(665) |
| P82663 | (44)L51_S25_CI-B8(94)                                                                                                                                                                                                                                                                                                                                                                                                   |
| P07814 | (72)GST_C_3(155)~(197)tRNA-synt_1c(501)~(504)tRNA-synt_1c_C(681)~(753)WHEP-TRS(805)~(826)WHEP-TRS(878)~(904)WHEP-TRS(954)~(1114)tRNA-synt_2b(1284)~(1303)HGTP_anticodon(1403)~(1430)ProRS-C_1(1512)                                                                                                                                                                                                                     |
| Q9NXG2 | (121)THUMP(253)                                                                                                                                                                                                                                                                                                                                                                                                         |
| A6XGL0 | (90)YjeF_N(259)                                                                                                                                                                                                                                                                                                                                                                                                         |
| O95926 | (91)SYF2(238)                                                                                                                                                                                                                                                                                                                                                                                                           |
| Q9Y2H9 | (61)DUF1908(335)~(376)Pkinase(647)~(970)PDZ(1050)                                                                                                                                                                                                                                                                                                                                                                       |
| Q8IU85 | (23)Pkinase(279)                                                                                                                                                                                                                                                                                                                                                                                                        |
| Q9BR84 | (14)KRAB(53)~(176)zf-H2C2_2(192)~(241)zf-C2H2(263)~(297)zf-C2H2(319)~(312)zf-H2C2_2(335)~(340)zf-H2C2_2(364)~(367)zf-H2C2_2(391)~(381)zf-C2H2(403)~(425)zf-H2C2_2(447)~(451)zf-H2C2_2(475)~(480)zf-H2C2_2(504)~(493)zf-C2H2(515)                                                                                                                                                                                        |
| P17844 | (118)DEAD(288)~(328)Helicase_C(435)~(498)P68HR(532)~(551)P68HR(583)                                                                                                                                                                                                                                                                                                                                                     |
| P01612 | (6)V-set(107)                                                                                                                                                                                                                                                                                                                                                                                                           |
| P14678 | (10)LSM(81)                                                                                                                                                                                                                                                                                                                                                                                                             |
| O14498 | (51)LRR_8(110)~(123)LRR_8(181)                                                                                                                                                                                                                                                                                                                                                                                          |
| Q9UMY1 | (172)NUC129(234)                                                                                                                                                                                                                                                                                                                                                                                                        |
| Q9NNW5 | (205)WD40(237)~(288)WD40(325)~(972)WD40(1010)                                                                                                                                                                                                                                                                                                                                                                           |
| P82675 | (218)Ribosomal_S5(283)~(297)Ribosomal_S5_C(365)                                                                                                                                                                                                                                                                                                                                                                         |
| Q86VH4 | (66)LRR_8(121)~(71)LRR_5(183)~(157)LRR_8(217)~(230)LRR_8(289)                                                                                                                                                                                                                                                                                                                                                           |
| O95232 | (4)LUC7(246)                                                                                                                                                                                                                                                                                                                                                                                                            |
