# Supplementary material for: Genome-wide survey of putative RNA-binding proteins encoded in the human proteome
Source: Royal Society of Chemistry journal article supplement (doi:10.1039/c5mb00638d), 2015-11-30
Supplement: c5mb00638d1.zip [file c5mb00638d1.zip]

**Supplementary Table 7:** List of genes that are common to our study, the census of human RNA-binding proteins and the unexplored human RBP atlas as well as unique to each study.

| Genes common to all three studies | Genes unique to our study | Genes unique to the census of human RBPs (Gerstberger et al.) | Genes unique to the unexplored human RBP atlas by SPOT-Seq RNA (Zhao et al.) |
|-----------------------------------|---------------------------|---------------------------------------------------------------|------------------------------------------------------------------------------|
| ADAT2                             | 44M2.3                    | AARSD1                                                        | BRD8                                                                         |
| ADAT3                             | AAMP                      | ABT1                                                          | SAP130                                                                       |
| BCLAF1                            | ABCA1                     | AC004381.6                                                    | PWWP2A                                                                       |
| BUD13                             | ABCA10                    | ACIN1                                                         | TCEAL5                                                                       |
| CAPRIN1                           | ABCA12                    | AFF1                                                          | FLG                                                                          |
| CAPRIN2                           | ABCA13                    | AGFG1                                                         | SAMD11                                                                       |
| CCNT2                             | ABCA2                     | AIMP2                                                         | CEP290                                                                       |
| CNOT7                             | ABCA3                     | AKAP17A                                                       | GLTSCR1L                                                                     |
| CNOT8                             | ABCA4                     | AKAP8                                                         | RASA1                                                                        |
| CWF19L2                           | ABCA5                     | AKAP8L                                                        | CXXC5                                                                        |
| CXorf23                           | ABCA6                     | ALKBH1                                                        | APOBR                                                                        |
| DALRD3                            | ABCA7                     | ALKBH5                                                        | TAF1C                                                                        |
| DARS                              | ABCA8                     | ALKBH8                                                        | ING3                                                                         |
| DAZ3                              | ABCA9                     | ANG                                                           | ARHGAP39                                                                     |
| DAZ4                              | ABCB1                     | ANGEL1                                                        | SHCBP1L                                                                      |
| DCP1B                             | ABCB10                    | ANGEL2                                                        | SRCIN1                                                                       |
| DDX27                             | ABCB11                    | APEX1                                                         | HMX1                                                                         |
| DDX39A                            | ABCB4                     | API5                                                          | NFIB                                                                         |
| DNTTIP2                           | ABCB5                     | AQR                                                           | DLX5                                                                         |
| EEF1A1                            | ABCB6                     | ARHGEF28                                                      | DLX1                                                                         |
| EEF1A2                            | ABCB9                     | ASH1L                                                         | KAT7                                                                         |
| EIF2S3                            | ABCC1                     | ATXN2                                                         | ZNF355P                                                                      |
| EIF2S3L                           | ABCC11                    | AUH                                                           | SPTA1                                                                        |
| EIF4ENIF1                         | ABCC12                    | AZGP1                                                         | OTUD4                                                                        |
| FBLL1                             | ABCC2                     | BARD1                                                         | LRRC8A                                                                       |
| GFM1                              | ABCC4                     | BAZ2A                                                         | RSPH4A                                                                       |
| GPATCH8                           | ABCC5                     | BAZ2B                                                         | CRTC2                                                                        |

|         |         |          |           |
|---------|---------|----------|-----------|
| GSPT1   | ABCC6   | BMS1     | PIDD1     |
| GSPT2   | ABCC8   | BRCA1    | CCDC88A   |
| GTPBP1  | ABCC9   | BRIX1    | ZNF630    |
| GTPBP2  | ABCD3   | BZW1     | LRRC10    |
| GUF1    | ABCF2   | BZW2     | ZNF618    |
| HABP4   | ABCF3   | C11orf68 | FOXN3     |
| HBS1L   | ACBD6   | C17orf85 | NUPL1     |
| IARS    | ACD     | C1QBP    | WASL      |
| ICT1    | ACR     | C2orf15  | COL4A5    |
| KARS    | ACVR1B  | C9orf129 | CASZ1     |
| LARS    | ADCK1   | CACTIN   | SFTPD     |
| LARS2   | ADCK2   | CALR     | GLI1      |
| MEPCE   | ADCK3   | CALR3    | COL20A1   |
| MTFMT   | ADCK5   | CANX     | IGFBP3    |
| MTRF1   | ADRBK1  | CCDC59   | INPP5D    |
| MTRF1L  | ADRBK2  | CCRN4L   | EDA       |
| NARS    | AGGF1   | CD2BP2   | SPATA31A6 |
| NARS2   | AHI1    | CDK5RAP1 | ENTHD1    |
| PABPN1L | AICDA   | CEBPZ    | TCEAL6    |
| PAPD5   | AK2     | CHTOP    | CTAGE5    |
| PAPD7   | AK3     | CLK1     | C6orf222  |
| PARS2   | AK4     | CLK2     | MCPH1     |
| PNLDC1  | AKAP7   | CLK4     | SUPT20H   |
| QARS    | AKT1    | CNOT1    | RAPGEF2   |
| RARS    | AKT2    | CNOT10   | PRRT4     |
| RARS2   | AKT3    | CNOT11   | WIP1      |
| RBFOX3  | ALDH1L1 | CNOT6    | SIX5      |
| RBPMS2  | ALDH1L2 | CNOT6L   | IRF2BP2   |
| RRP12   | AMFR    | CPSF4    | KLF5      |
| SMG7    | AMIGO1  | CRYZ     | TLN2      |
| SRRM3   | AMIGO3  | CTU1     | SP1       |

|         |            |         |            |
|---------|------------|---------|------------|
| SWT1    | ANAPC5     | CTU2    | DOK7       |
| TARS    | ANK1       | CWC22   | NR1H3      |
| TARS2   | ANK2       | CWC25   | FAM47C     |
| TARSL2  | ANK3       | CWC27   | ZNF577     |
| THRAP3  | ANKDD1A    | DDX26B  | RAD17      |
| TOE1    | ANKDD1B    | DEK     | LRSAM1     |
| TRIT1   | ANKEF1     | DGCR14  | SPATA31A7  |
| TRMT2B  | ANKFY1     | DNAJC17 | CFAP46     |
| TUFM    | ANKK1      | DNMT1   | ADAMTS12   |
| VAR5    | ANKMY1     | DRG2    | DMAP1      |
| VAR52   | ANKRA2     | DUSP11  | TRPS1      |
| WARS    | ANKRD12    | DYNC1H1 | TNS4       |
| WDR5    | ANKRD16    | DYNLL1  | KCNK4      |
| YBX3    | ANKRD19P   | DZIP1   | CDCA5      |
| YTHDC1  | ANKRD2     | DZIP1L  | TOX        |
| YTHDC2  | ANKRD20A1  | DZIP3   | HOXC11     |
| YTHDF1  | ANKRD20A2  | EDC4    | FRMPD1     |
| YTHDF2  | ANKRD20A3  | EEF1B2  | MAP6D1     |
| YTHDF3  | ANKRD20A4  | EEF1D   | FAM110B    |
| ZCCHC11 | ANKRD20A8P | EEF1E1  | KRTAP10-12 |
| ZNF385A | ANKRD23    | EEF1G   | KRTAP10-11 |
| ZNF473  | ANKRD24    | EEF2K   | MACF1      |
|         | ANKRD27    | EIF1AD  | KRTAP10-8  |
|         | ANKRD28    | EIF1AX  | MLXIP      |
|         | ANKRD29    | EIF1AY  | GEN1       |
|         | ANKRD30B   | EIF2A   | POM121     |
|         | ANKRD30BL  | EIF2AK3 | PHACTR2    |
|         | ANKRD31    | EIF2B3  | LIMD1      |
|         | ANKRD35    | EIF2B5  | ZMYM4      |
|         | ANKRD42    | EIF2D   | NR1D2      |
|         | ANKRD44    | EIF2S2  | ZNF217     |

|          |         |          |
|----------|---------|----------|
| ANKRD50  | EIF3E   | BCAS1    |
| ANKRD52  | EIF3H   | DENND1A  |
| ANKRD54  | EIF3K   | IER5L    |
| ANKRD55  | EIF3M   | CDC42EP4 |
| ANKRD6   | EIF5    | COL4A6   |
| ANKRD61  | EIF5A   | FRMPD3   |
| ANKRD62  | EIF5A2  | POM121B  |
| ANKRD65  | EIF5AL1 | NUTM2B   |
| ANKRD66  | ENDOG   | MYH8     |
| ANKRD7   | ENDOV   | SSBP4    |
| ANKS1A   | ENOX1   | RAPH1    |
| ANKS1B   | EWSR1   | PPP1R13L |
| ANKS3    | EXO1    | CENPT    |
| ANKS6    | EXOG    | KIF19    |
| APAF1    | EXOSC3  | PARP9    |
| APOA1BP  | EZH2    | SCYL1    |
| APOBEC3A | FAM120A | MROH1    |
| APOBEC3B | FAM120B | ANKRD11  |
| APOBEC3C | FAM120C | ATF7IP   |
| APOBEC3D | FAM46A  | ABI3BP   |
| ARID4A   | FAM98B  | DLGAP4   |
| ASB10    | FAM98C  | ARHGEF26 |
| ASB13    | FARSA   | PLEKHA6  |
| ASB14    | FASTK   | EMID1    |
| ASB15    | FBXO17  | COL26A1  |
| ASB16    | FRG1    | LRR1     |
| ASB2     | FRG1B   | ZBTB21   |
| ASB3     | FYTTD1  | ZMIZ1    |
| ASB6     | GAPDH   | PPP1R15A |
| ASB7     | GATC    | FAM122A  |
| ASB8     | GCFC2   | SH3KBP1  |

|          |          |          |
|----------|----------|----------|
| ASCC3    | GEMIN2   | NYAP1    |
| ASZ1     | GEMIN4   | FOXD1    |
| ATE1     | GEMIN6   | BAHD1    |
| ATG16L2  | GEMIN7   | GAS2L3   |
| AURKA    | GNL1     | ZNF649   |
| AURKAIP1 | GNL3L    | KIAA1683 |
| AURKC    | GPATCH4  | ZNF341   |
| BCL3     | GPKOW    | CENPC    |
| BCL6     | HELZ     | SHROOM1  |
| BCOR     | HNRNPU   | ZBTB5    |
| BGN      | HNRNPUL1 | ZBTB39   |
| BRAF     | IFIT1    | NRIP1    |
| BRSK2    | IFIT1B   | ZBTB8B   |
| BRWD1    | IFIT2    | GLTSCR1  |
| BRWD3    | IFIT3    | ARMC9    |
| BTRC     | IFIT5    | ODF3B    |
| BUB3     | IGHMBP2  | ITIH6    |
| C1R      | ILF2     | REPS1    |
| C1RL     | IMP3     | BPTF     |
| C1S      | IMP4     | NUMBL    |
| C2       | INTS1    | PHGR1    |
| C2orf49  | INTS10   | BCL11B   |
| C9orf72  | INTS12   | TREML4   |
| CAMK1    | INTS3    | HSF5     |
| CAMK1D   | INTS4    | ARRDC1   |
| CAMK1G   | INTS6    | ARPP21   |
| CAMK2A   | INTS7    | HMX3     |
| CAMK2B   | INTS8    | CAMSAP2  |
| CAMK2D   | INTS9    | H1FNT    |
| CAMK2G   | IPO11    | SPOCK1   |
| CAMK4    | IPO13    | CEP97    |

|          |          |           |
|----------|----------|-----------|
| CAMKK1   | IPO4     | TMC2      |
| CAMKK2   | IPO5     | RGPD1     |
| CAMKV    | IPO7     | RGPD2     |
| CASK     | IPO8     | WAS       |
| CCDC103  | IPO9     | ERVK-10   |
| CCDC12   | ISY1     | SHOC2     |
| CCNC     | JAKMIP1  | DNAAF3    |
| CD101    | KHDC1    | ERC2      |
| CD180    | KHDC1L   | IRAK3     |
| CDC20    | KHNYN    | TRGV3     |
| CDC20B   | KIAA0020 | GIGYF1    |
| CDC42BPA | KIAA0391 | RFC1      |
| CDC42BPB | KIN      | MYPOP     |
| CDC42BPG | KPNB1    | LPPR3     |
| CDK1     | KRR1     | CSF2RB    |
| CDK10    | L1TD1    | RIMS1     |
| CDK11A   | LAS1L    | FAM222A   |
| CDK11B   | LCMT2    | KRTAP29-1 |
| CDK13    | LONP1    | ARHGAP23  |
| CDK14    | LRRC47   | HOXA3     |
| CDK15    | LRRFIP1  | GAGE13    |
| CDK16    | LRRFIP2  | LNP       |
| CDK17    | LSG1     | AFTPH     |
| CDK18    | LSM11    | OSR2      |
| CDK2     | LSMD1    | C19orf47  |
| CDK20    | LUZP4    | SOX10     |
| CDK3     | MAK16    | TIAM1     |
| CDK4     | MAZ      | EBF1      |
| CDK5     | METTL1   | GLI2      |
| CDK6     | METTL10  | GLI3      |
| CDK7     | METTL2A  | ZBTB48    |

|        |         |         |
|--------|---------|---------|
| CDK8   | METTL2B | CEP170B |
| CDKL1  | METTL5  | AGBL5   |
| CDKL2  | MOV10   | DAB1    |
| CDKL4  | MRP63   | STIL    |
| CDKL5  | MRPL10  | PRB1    |
| CDRT1  | MRPL14  | ELN     |
| CELA1  | MRPL18  | IGFBP2  |
| CELA2A | MRPL21  | ZNF362  |
| CELA2B | MRPL22  | TMEM108 |
| CELA3A | MRPL23  | GOLGA2  |
| CELA3B | MRPL30  | GOLGA3  |
| CFB    | MRPL32  | SH3D21  |
| CFD    | MRPL35  | FAM53C  |
| CFI    | MRPL36  | SEC31A  |
| CFTR   | MRPL38  | LRIF1   |
| CHAD   | MRPL45  | PANX2   |
| CHAF1B | MRPL46  | MDM1    |
| CHCHD1 | MRPL47  | USP17L1 |
| CHEK1  | MRPL49  | EVL     |
| CHEK2  | MRPL52  | PRDM13  |
| CHUK   | MRPL54  | FAM196B |
| CIAO1  | MRPS12  | ARMC2   |
| CIRH1A | MRPS27  | DCAF4   |
| CIT    | MRPS31  | HOXB9   |
| CLUH   | MRPS35  | ZNF695  |
| COPA   | MRPS36  | MBD1    |
| COPB2  | MRPS6   | SPTY2D1 |
| CORIN  | MSL3    | MED26   |
| CORO1A | MTERFD2 | CCDC120 |
| CORO1B | MTG1    | BICD2   |
| CORO1C | MTHFSD  | ZSCAN5D |

|         |          |          |
|---------|----------|----------|
| CORO2A  | MTIF3    | PPP6R2   |
| CORO2B  | MTPAP    | SS18L1   |
| CORO6   | MVP      | C5orf60  |
| CORO7   | N4BP1    | VSTM2A   |
| CRCP    | NIP7     | NCOR1    |
| CREBBP  | NOA1     | C17orf47 |
| CSNK2A1 | NOB1     | GRIN2B   |
| CSNK2A2 | NOC2L    | DOPEY1   |
| CSNK2A3 | NOC4L    | IL16     |
| CT55    | NOL3     | FOXK2    |
| CTRC    | NOL8     | THBS3    |
| CTRL    | NOP16    | ZBTB42   |
| CTTNBP2 | NOP2     | S100PBP  |
| DAPK1   | NPM1     | RSRP1    |
| DAPK2   | NPM2     | ODF3L2   |
| DAPK3   | NPM3     | NGEF     |
| DAW1    | NR0B1    | MPLKIP   |
| DCAF10  | NSA2     | SLC35G1  |
| DCAF11  | NSRP1    | NCR3     |
| DCAF5   | NSUN2    | KLF1     |
| DCAF8L1 | NSUN3    | SPATA6   |
| DCAF8L2 | NSUN4    | STK11IP  |
| DCLK1   | NSUN5    | SPANXN2  |
| DCLK2   | NSUN6    | SEN7     |
| DCLK3   | NSUN7    | SYNPO    |
| DCN     | NUDT16   | ATAD2    |
| DDB1    | NUDT16L1 | PASD1    |
| DDB2    | NUFIP2   | LEF1     |
| DIEXF   | NUP153   | SCNN1A   |
| DMPK    | NUTF2    | ZBTB1    |
| DMXL2   | NXF2B    | ARHGEF5  |



|          |           |          |
|----------|-----------|----------|
| DTD1     | NXT1      | KRTAP5-1 |
| DTD2     | NXT2      | GTSE1    |
| DTL      | NYNRIN    | KIF26A   |
| DYNC1I1  | OBFC1     | SENP1    |
| DYNC1I2  | PA2G4     | FOXO1    |
| DYRK1A   | PABPC1L2B | KMT2D    |
| DYRK2    | PAIP2     | LIN54    |
| DYRK3    | PAIP2B    | DBN1     |
| DYRK4    | PAN3      | HEATR5A  |
| E4F1     | PARK7     | EMSY     |
| EBLN1    | PARP1     | ERICH5   |
| EBLN2    | PARP12    | C11orf63 |
| EHBP1    | PARP4     | TAOK1    |
| EHBP1L1  | PATL1     | YEATS2   |
| EIF4EBP1 | PATL2     | TAPBPL   |
| EIF4EBP2 | PDCD4     | CBX8     |
| EIF4EBP3 | PDCD7     | FAM71E2  |
| ELL      | PDE12     | FAM90A8P |
| ELL2     | PEG10     | BNC1     |
| ELL3     | PES1      | COL4A3   |
| ELP2     | PHF5A     | OVOL1    |
| ELP5     | PIH1D3    | DPCR1    |
| EML1     | PIN4      | SGIP1    |
| EML2     | PLD6      | CDSN     |
| EML3     | PNRC2     | TMC5     |
| EML4     | POLDIP3   | CBX7     |
| EML5     | POP4      | VSTM4    |
| EML6     | POP7      | MYT1     |
| EP300    | PPAN      | RNF220   |
| ERCC8    | PPARGC1A  | ZNF764   |
| ERVK6    | PPARGC1B  | MSL1     |

|          |                |           |
|----------|----------------|-----------|
| ESPN     | PPIH           | SOX9      |
| ESPNL    | PPIL3          | SOX2      |
| EXD2     | PPP1R10        | SGOL1     |
| EXO5     | PPP1R8         | LRRC8D    |
| F10      | PPRC1          | KIAA0922  |
| F11      | PQBP1          | SPATA31A3 |
| F12      | PRDX1          | C10orf71  |
| F7       | PRKDC          | KRBA1     |
| F9       | PRPF39         | PHC1      |
| FAM102A  | PRPF40A        | NKX3-2    |
| FAM102B  | PRPF40B        | TCHHL1    |
| FAM172A  | PRPF4B         | TBX19     |
| FAM172BP | PSIP1          | STAG3     |
| FAM207A  | PSMA1          | MROH2B    |
| FAM58A   | PSMA6          | HMGA2     |
| FAM58BP  | PTCD2          | ABLIM2    |
| FANCF    | PTGES3         | ZZZ3      |
| FANCM    | PTGES3L-AARSD1 | PDE4DIP   |
| FANK1    | PTRF           | TCF24     |
| FBXW10   | PURA           | TACC1     |
| FBXW11   | PURB           | USP17L5   |
| FBXW2    | PURG           | SOX11     |
| FBXW4    | QRSL1          | SOX18     |
| FBXW8    | R3HCC1         | LAD1      |
| FBXW9    | RANBP17        | PHACTR1   |
| FEM1A    | RANBP2         | ARID3B    |
| FEM1B    | RANBP6         | USP17L8   |
| FEM1C    | RBBP6          | GAGE10    |
| FIZ1     | RBM20          | C1QC      |
| FLRT1    | RBM25          | C5orf24   |
| FLRT2    | RBM33          | NHSL2     |

|            |         |          |
|------------|---------|----------|
| FLRT3      | RBM41   | ZNF592   |
| FZR1       | RBM43   | NPIPB3   |
| GADD45GIP1 | RBM44   | FAM21C   |
| GART       | RBM48   | NUP50    |
| GNB1       | RBMY1J  | TBC1D3C  |
| GNB1L      | RDM1    | EPN1     |
| GNB2       | RNASE1  | VGLL1    |
| GNB3       | RNASE10 | PNPLA1   |
| GNB4       | RNASE11 | COLCA2   |
| GNB5       | RNASE12 | NKX6-1   |
| GNG10      | RNASE13 | SYNPO2L  |
| GNG12      | RNASE2  | C11orf96 |
| GNG2       | RNASE3  | ZNF843   |
| GNG3       | RNASE4  | FOS      |
| GNG4       | RNASE6  | BCL11A   |
| GNG5       | RNASE7  | USP42    |
| GNG7       | RNASE8  | UBQLN3   |
| GNG8       | RNASE9  | SOGA1    |
| GNGT2      | RNASEK  | STARD8   |
| GP5        | RNASET2 | LRRIQ1   |
| GPANK1     | RNF113A | CHAMP1   |
| GPATCH11   | RNF113B | ASXL2    |
| GRK1       | RNF17   | EFCAB6   |
| GRK4       | RNH1    | BLNK     |
| GRK5       | RP9     | HOXB4    |
| GRK6       | RPF1    | TTLL6    |
| GRK7       | RPF2    | HOXB8    |
| GSK3B      | RPL13   | NUTM2F   |
| GTF2A2     | RPL13A  | JADE1    |
| GTF2E1     | RPL17   | ZSCAN29  |
| GTF3C4     | RPL18   | CDAN1    |

|        |          |           |
|--------|----------|-----------|
| GTF3C5 | RPL18A   | NUTM2G    |
| GTF3C6 | RPL19    | PLEKHG4   |
| GTSF1  | RPL21    | PDLIM5    |
| GTSF1L | RPL22    | FAM222B   |
| GZF1   | RPL22L1  | BUB1      |
| GZMA   | RPL24    | ZNF746    |
| GZMK   | RPL27    | USP17L3   |
| GZMM   | RPL27A   | USP17L4   |
| HACE1  | RPL28    | SHE       |
| HBP1   | RPL29    | SSBP3     |
| HGF    | RPL35A   | CREM      |
| HGFAC  | RPL36    | EBF4      |
| HIC1   | RPL38    | FAM90A9P  |
| HINT1  | RPL41    | ZNF669    |
| HINT2  | RPL6     | PARP15    |
| HIPK2  | RPL7     | ZBTB47    |
| HIRA   | RPL7L1   | GATA2     |
| HIVEP2 | RPLP1    | CBX6      |
| HP     | RPLP2    | ARHGAP27  |
| HPN    | RPP14    | BASP1     |
| HPR    | RPP25    | KIAA1211L |
| HUNK   | RPP38    | ZNF687    |
| IFT122 | RPS13    | TECPR2    |
| IFT80  | RPS17    | DMD       |
| IGHA1  | RPS17L   | ZNF512    |
| IGHA2  | RPS19BP1 | EPB41L3   |
| IGHD   | RPS21    | HMGXB3    |
| IGHE   | RPS24    | PROSER3   |
| IGHM   | RPS25    | THSD1     |
| IGKC   | RPS26    | KIAA1107  |
| IGLC1  | RPS27    | RNF213    |

|        |          |           |
|--------|----------|-----------|
| IGLC2  | RPS27L   | ZFP57     |
| IGLC3  | RPS28    | ZMYM3     |
| IGLC6  | RPS3A    | KIF15     |
| IGLC7  | RPS4X    | SORBS1    |
| IGSF10 | RPS4Y1   | CARD6     |
| IKBKAP | RPS4Y2   | C6orf132  |
| IKBKB  | RPS7     | POC5      |
| INVS   | RPS8     | FAM47B    |
| IPPK   | RQCD1    | LAMB3     |
| IRAK4  | RRBP1    | GPBP1L1   |
| IRF3   | RRNAD1   | SLAIN1    |
| IRF4   | RRP15    | HOXD8     |
| IRF5   | RRP36    | HEATR5B   |
| IRF6   | RRP8     | LRRC31    |
| IRF7   | RSL1D1   | ZNF645    |
| IRF8   | RSL24D1  | FAM135A   |
| IRF9   | RSRC1    | GMCL1     |
| ISG15  | RTF1     | NUTM2E    |
| ISLR   | RUVBL1   | C3orf67   |
| ISLR2  | RUVBL2   | TMEM201   |
| JMJD1C | SAMD4A   | FAM214B   |
| JMJD4  | SAMD4B   | AKAP2     |
| JMJD6  | SAMHD1   | PHF20     |
| KALRN  | SAP18    | SAMD10    |
| KANK1  | SARNP    | HECW2     |
| KANK4  | SCAF1    | E2F8      |
| KAT5   | SCAF11   | ANKLE2    |
| KATNB1 | SCAF4    | RTN3      |
| KDM3A  | SCAF8    | TRBV12-3  |
| KDM3B  | SECISBP2 | PTGFRN    |
| KDM4A  | SETD1A   | CTTNBP2NL |

|           |          |           |
|-----------|----------|-----------|
| KDM4B     | SETD1B   | USP43     |
| KDM4C     | SETD7    | NKX6-2    |
| KDM4D     | SF3A2    | WAPAL     |
| KDM4E     | SHQ1     | MTSS1L    |
| KDM5A     | SLC4A1AP | NYAP2     |
| KDM5B     | SMAD1    | ZFAT      |
| KDM5C     | SMAD2    | MYCN      |
| KDM5D     | SMAD3    | ADNP2     |
| KDM7A     | SMAD4    | IRF2BPL   |
| KIAA0100  | SMAD5    | ABL1      |
| KIAA1239  | SMAD6    | DNAH6     |
| KIAA1875  | SMAD7    | MISP      |
| KIDINS220 | SMAD9    | C2orf16   |
| KLK1      | SMG8     | GAGE2A    |
| KLK10     | SMN2     | SEC24C    |
| KLK11     | SND1     | DENND1C   |
| KLK12     | SNIP1    | SHROOM2   |
| KLK13     | SNRNP25  | INPPL1    |
| KLK14     | SNRNP27  | REXO1L1P  |
| KLK15     | SNRNP48  | DAGLA     |
| KLK3      | SNUPN    | TGIF2     |
| KLK4      | SNW1     | HEMGN     |
| KLK5      | SPATS2L  | ADGRA3    |
| KLK6      | SRBD1    | ALX1      |
| KLK7      | SRFBP1   | SMARCC2   |
| KLK8      | SRPK2    | TTC21B    |
| KLKB1     | SRRM1    | ZNF696    |
| LALBA     | SRRM2    | FBXO42    |
| LATS1     | SRSF11   | KIF27     |
| LATS2     | SUB1     | FAM117B   |
| LEO1      | SUPT6H   | KRTAP10-4 |

|        |        |           |
|--------|--------|-----------|
| LGI3   | SUZ12  | MUC20     |
| LGR4   | TAF15  | NIPBL     |
| LGR5   | TAF9   | HEATR6    |
| LGR6   | TBRG4  | ADNP      |
| LINGO2 | TDRD10 | SH3RF2    |
| LINGO3 | TDRD15 | LOXL1     |
| LINGO4 | TDRD6  | PANK1     |
| LLPH   | TEFM   | MICALL1   |
| LONRF1 | TEX13A | HOXC10    |
| LPA    | TFAM   | REST      |
| LRBA   | THOC5  | NR4A3     |
| LRFN1  | THOC6  | ARID1B    |
| LRFN2  | TIPARP | PLEKHA5   |
| LRFN3  | TNPO1  | CLCN1     |
| LRFN5  | TNPO2  | EBF3      |
| LRG1   | TNRC6A | SH3RF1    |
| LRIG1  | TNRC6B | CTTN      |
| LRIG2  | TNRC6C | NKX1-2    |
| LRRC15 | TOP1   | BAG4      |
| LRRC17 | TOP3B  | PAPLN     |
| LRRC24 | TPR    | PLEKHG5   |
| LRRC26 | TRDMT1 | KRTAP10-9 |
| LRRC32 | TRIM25 | PRRC2B    |
| LRRC38 | TRIM56 | PSMD2     |
| LRRC57 | TRIM71 | TBX2      |
| LRRC69 | TRMT44 | KNOP1     |
| LRRC70 | TSEN54 | DUX4L7    |
| LRRK2  | TSN    | CDADC1    |
| LRRN1  | TSNAX  | ZNF280D   |
| LRRN3  | TSR1   | CREB5     |
| LRRTM1 | TSR2   | GATA5     |

|         |         |           |
|---------|---------|-----------|
| LRRTM2  | TST     | ARHGAP19  |
| LRRTM3  | TTF2    | ZNF503    |
| LRRTM4  | TUT1    | GATA3     |
| LRTM1   | TXNL4A  | DMRT2     |
| LRTM2   | TXNL4B  | DMRTC2    |
| LSM8    | TYW5    | TAB2      |
| LUM     | U2AF1   | SIM1      |
| LYST    | U2AF1L4 | TTBK1     |
| LYZ     | UBA1    | ERVK-8    |
| LYZL1   | UBTF    | HERVK_113 |
| LYZL2   | UHMK1   | ERVK-7    |
| LYZL4   | UNK     | TRIP12    |
| LYZL6   | URM1    | RAB26     |
| MAK     | USB1    | TPX2      |
| MAP2K1  | USP10   | MN1       |
| MAP2K2  | USP39   | NFATC4    |
| MAP2K3  | VARSL   | NFXL1     |
| MAP2K4  | WDR4    | RAB11FIP1 |
| MAP2K5  | WIBG    | INSM1     |
| MAP2K6  | XAB2    | KLF8      |
| MAP2K7  | XPO6    | BCL7A     |
| MAP3K1  | XPO7    | ZSCAN18   |
| MAP3K10 | XRCC6   | MTA2      |
| MAP3K14 | ZC3H10  | EPG5      |
| MAP3K15 | ZC3H12A | ADAM33    |
| MAP3K19 | ZC3H12C | ZNF532    |
| MAP3K2  | ZC3H12D | CLOCK     |
| MAP3K3  | ZC3H13  | ANO8      |
| MAP3K4  | ZC3H14  | KIF26B    |
| MAP3K5  | ZC3H15  | FOXJ3     |
| MAP3K6  | ZC3H4   | PHF21B    |



|          |          |              |
|----------|----------|--------------|
| MAP3K7   | ZC3H7A   | PRDM6        |
| MAP4K1   | ZC3H7B   | SRCAP        |
| MAP4K2   | ZC3H8    | CD8BP        |
| MAP4K4   | ZC3HAV1  | KANSL1L      |
| MAP4K5   | ZC3HAV1L | ATF7         |
| MAPK1    | ZCCHC2   | AKNA         |
| MAPK11   | ZCCHC24  | HOXA1        |
| MAPK12   | ZCCHC3   | FAM21A       |
| MAPK13   | ZCCHC5   | PKD2         |
| MAPK14   | ZCCHC7   | RGPD4        |
| MAPK3    | ZCCHC8   | COL16A1      |
| MAPK9    | ZFC3H1   | ZNF776       |
| MAPKAPK3 | ZMAT2    | LBR          |
| MAPKAPK5 | ZMAT5    | PVRL1        |
| MARK2    | ZNF598   | KCNH2        |
| MARK3    | ZNF622   | MTA1         |
| MARK4    | ZNFX1    | FAM184B      |
| MARVELD2 | ZNHIT6   | SIMC1        |
| MASP1    | ZRSR1    | FRMD4A       |
| MASP2    | ZRSR2    | SOS2         |
| MAST2    |          | MCUR1        |
| MAST3    |          | ZIC5         |
| MAST4    |          | DLX4         |
| MASTL    |          | PAGE4        |
| MCM3AP   |          | RSF1         |
| MED20    |          | MYH4         |
| MED31    |          | CEP250       |
| MELK     |          | SPATC1       |
| METAP1   |          | C1QTNF9B-AS1 |
| METTL4   |          | PPM1D        |
| MFAP1    |          | OVOL2        |

|          |          |
|----------|----------|
| MIB1     | FOXJ2    |
| MIB2     | ADAM22   |
| MINK1    | TIGIT    |
| MKNK2    | PLEKHA7  |
| MKRN4P   | FAM133B  |
| MLST8    | HHLA1    |
| MMS19    | IRX1     |
| MOK      | IRX3     |
| MPHOSPH8 | IRX6     |
| MRI1     | IRX4     |
| MRPL57   | SMTN     |
| MSH2     | TCF4     |
| MSH3     | COL25A1  |
| MSH4     | PHLDB1   |
| MST1     | GGN      |
| MST1L    | FANCA    |
| MST4     | GRN      |
| MTF1     | DAZAP2   |
| MTG2     | FAM205A  |
| MTPN     | UBN2     |
| MYLK     | PLSCR1   |
| MYLK2    | SOWAHB   |
| MYLK3    | FANCD2   |
| MYLK4    | C1orf127 |
| MYNN     | PRX      |
| MYO16    | DNMT3A   |
| MYO3A    | RUSC2    |
| MYO3B    | AMOT     |
| NEDD1    | STRCP1   |
| NEDD8    | IRX2     |
| NEK10    | GAGE7    |

|        |                                       |
|--------|---------------------------------------|
| NEK11  | KRTAP10-3                             |
| NEK2   | BEST4                                 |
| NEK3   | BEST2                                 |
| NEK5   | MLLT3                                 |
| NEK6   | EFCAB2                                |
| NEK7   | TBCE                                  |
| NEK8   | CNGA3                                 |
| NEK9   | FOXC2                                 |
| NFKBIA | FOXB2                                 |
| NFKBIB | SPOCK2                                |
| NHEJ1  | ZNF766                                |
| NIM1K  | FAM168A                               |
| NLE1   | NCAPD3                                |
| NLK    | ZNF276                                |
| NOTCH1 | AFAP1                                 |
| NOTCH2 | MAML3                                 |
| NOTCH3 | GAGE12B; GAGE12C;<br>GAGE12D; GAGE12E |
| NRDE2  | EGR1                                  |
| NRK    | NFE2L1                                |
| NRROS  | KRTAP5-8                              |
| NSMAF  | USP17L2                               |
| NTPCR  | SPATA32                               |
| NUAK2  | COL7A1                                |
| NUP133 | RCSD1                                 |
| NUP155 | ARHGAP11A                             |
| NUP35  | NIN                                   |
| NWD1   | SMAP2                                 |
| NYX    | CUX2                                  |
| OBSCN  | STPG1                                 |
| OCEL1  | ARID2                                 |
| OCLN   | PDLIM2                                |

|          |           |
|----------|-----------|
| OLA1     | CBX2      |
| OMD      | ARHGEF18  |
| OMG      | CRTC1     |
| OVCH1    | GOLGB1    |
| OVCH2    | FAM149A   |
| OXS1     | THBS1     |
| PAAF1    | TPRX1     |
| PAF1     | KLF11     |
| PAFAH1B1 | FAM90A27P |
| PAK1     | CAST      |
| PAK1IP1  | CXorf67   |
| PAK2     | BARHL2    |
| PAK3     | C17orf82  |
| PAK4     | HIAT1     |
| PAK7     | MPHOSPH9  |
| PAMR1    | CENPF     |
| PATZ1    | CLINT1    |
| PDPK1    | MDC1      |
| PDPK2    | HECW1     |
| PELP1    | TTLL4     |
| PEX7     | USP34     |
| PHIP     | STAG2     |
| PHKG1    | ZNF512B   |
| PHKG2    | MAGED2    |
| PHLPP1   | FAM90A20P |
| PIM2     | RBBP8NL   |
| PIM3     | PLEKHM2   |
| PKMYT1   | FAM114A1  |
| PKN1     | FBRS      |
| PKN2     | ZNF556    |
| PKN3     | KIF18A    |

|        |          |
|--------|----------|
| PLA2G6 | MEF2D    |
| PLAT   | SYNE2    |
| PLAU   | CDX1     |
| PLEC   | LRRC9    |
| PLK1   | TMEM259  |
| PLK2   | CCDC150  |
| PLK3   | ZNF578   |
| PLK4   | KRTAP5-3 |
| PNCK   | KRTAP5-4 |
| POC1A  | NCOA1    |
| POC1B  | SCARA3   |
| POLQ   | CCDC171  |
| POLR1A | LRCH3    |
| POLR1B | MAPT     |
| POLR1C | SLC38A10 |
| POLR1D | MUM1     |
| POLR2C | XAGE2    |
| POLR3A | DSPP     |
| POLR3B | PCLO     |
| POLR3C | ARAP3    |
| POLR3D | ZNF20    |
| POLR3E | GAGE6    |
| POLR3F | ZNF18    |
| POLR3H | MSL2     |
| POT1   | SP110    |
| POTEA  | XAGE3    |
| POTEB  | ANXA11   |
| POTEB2 | SOGA3    |
| POTEC  | ZNF608   |
| POTED  | FAM129B  |
| POTEE  | VGLL2    |

POTEF  
POTEG  
POTEH  
POTEI  
POTEJ  
POTEM  
PPP1R12B  
PPP1R12C  
PPP1R16A  
PRDM10  
PRDM15  
PRDM9  
PRIM2  
PRKAA1  
PRKAA2  
PRKACA  
PRKACB  
PRKACG  
PRKCA  
PRKCB  
PRKCD  
PRKCE  
PRKCG  
PRKCH  
PRKCI  
PRKCQ  
PRKCZ  
PRKD1  
PRKD2  
PRKD3  
PRKG1

RERE  
ZFP64  
PDPK2P  
IBTK  
CHD7  
NEXN-AS1  
SOX7  
UBQLN1  
SCEL  
FAM117A  
ZBTB41  
ANTXR1  
FOXI1  
PYGO2  
AMOTL1  
ZNF230  
ZNF587  
COL4A1  
COL3A1  
SOX8  
ZNF175  
KIAA1462  
MBD5  
KIAA1468  
SH3BP1  
RTN4  
JADE2  
POU2F3  
FAM169A  
KNG1  
SETBP1

|         |            |
|---------|------------|
| PRKG2   | TNIP1      |
| PRKX    | ZFHX2      |
| PRKY    | SETD5      |
| PROC    | ZHX2       |
| PRORS1P | ZNF148     |
| PRSS1   | SH3BP2     |
| PRSS12  | MUC2       |
| PRSS2   | ERC1       |
| PRSS22  | MAP4       |
| PRSS27  | SOX17      |
| PRSS29P | SP3        |
| PRSS3   | NKX2-1     |
| PRSS33  | HCN3       |
| PRSS38  | ECM29      |
| PRSS3P2 | TAF6L      |
| PRSS42  | ZBTB4      |
| PRSS44  | SPATA31D3  |
| PRSS45  | CC2D1A     |
| PRSS46  | COL8A1     |
| PRSS47  | PRG4       |
| PRSS48  | CD300LF    |
| PRSS50  | TEX2       |
| PRSS55  | KIFC3      |
| PRSS56  | AKNAD1     |
| PRSS58  | GPBP1      |
| PRSS8   | VCY; VCY1B |
| PSKH1   | WASF1      |
| PSKH2   | DNAI1      |
| PSMD10  | SPTBN5     |
| PWP1    | RADIL      |
| PXDN    | C1orf177   |

PXDNL  
RAD18  
RAF1  
RAI14  
RBBP4  
RBBP7  
RBMV1C  
RECQL5  
RFWD2  
RIF1  
RIPK1  
RIPK3  
RIPK4  
RNF11  
RNF115  
RNF122  
RNF126  
RNF128  
RNF13  
RNF130  
RNF133  
RNF148  
RNF149  
RNF150  
RNF165  
RNF181  
RNF215  
RNF222  
RNF24  
RNF32  
RNF38

ELMSAN1  
DMRTA2  
VAX2  
AHNAK  
PARD3  
COL17A1  
KCNH7  
PRR18  
TEX36  
RGAG1  
AGAP2  
C2orf81  
PROSER1  
MROH7  
SHISA8  
XRR1  
PPFIA4  
TAGAP  
SP2  
C19orf68  
HOXA2  
PDCD6IP  
DUX4L9  
CDKN1B  
FBXO38  
SSH1  
C9orf172  
PKP4  
LYN  
MED15  
VSX2



RNF4  
RNF44  
ROCK1  
ROCK2  
RPA1  
RPAP1  
RPAP2  
RPAP3  
RPL37L  
RPL39P5  
RPLP0P6  
RPS10P5  
RPS6KA1  
RPS6KA2  
RPS6KA3  
RPS6KA4  
RPS6KA6  
RPS6KB1  
RPS6KB2  
RPS6KC1  
RPS6KL1  
RRP7B  
RTN4R  
RTN4RL1  
RXFP1  
RXFP2  
SAC3D1  
SALL1  
SALL2  
SALL3  
SBK1

C17orf53  
ATM  
DMP1  
DENND2C  
TOP2A  
PHF20L1  
SAMD14  
COL11A2  
LRRC10B  
CHD8  
PAGE2  
ROBO2  
FAM71A  
DMRTA1  
EGR2  
FHAD1  
RITA1  
NCOA7  
TEX10  
ARHGAP31  
BEGAIN  
SAMD7  
CBL  
FAM83H  
SLC2A4RG  
CCDC6  
DISP1  
FAM90A7P  
LCE1E  
SPRR3  
FOXG1

SCAP  
SCNM1  
SCRIB  
SEC13  
SETD2  
SGK1  
SGK2  
SGK3  
SGK494  
SHFM1  
SIK2  
SIK3  
SIRPA  
SIRPG  
SLITRK3  
SLITRK5  
SMU1  
SNAI1  
SNAI2  
SNAPC2  
SNAPC3  
SNAPC5  
SPACA3  
SPACA5  
SPAG1  
SPAG16  
SPEG  
ST14  
STK10  
STK11  
STK17A

FOXA1  
OGFR  
FOXA3  
NTN4  
CDX4  
XKR5  
SELV  
ZNF195  
ZDHHC8  
KSR1  
PHC3  
ZNF524  
KIAA0586  
UNG  
NR2C1  
TBC1D3B  
CLEC16A  
FBXO11  
LRRCC1  
ZNF837  
FAM83B  
MTDH  
DMRT3  
ARFGAP3  
SLAIN2  
USP36  
TCF7L2  
ZNF75D  
MLLT6  
ADAM29  
ADAM30

|         |           |
|---------|-----------|
| STK17B  | RANBP9    |
| STK24   | ZNF461    |
| STK25   | TBKBP1    |
| STK3    | CUX1      |
| STK32A  | ARID1A    |
| STK32B  | IKZF3     |
| STK32C  | SPATA31D4 |
| STK33   | SPATA31E1 |
| STK36   | HOXB5     |
| STK38   | COLEC12   |
| STK38L  | COL22A1   |
| STK4    | PICALM    |
| STRN    | INPP5E    |
| STRN3   | UBQLN4    |
| STRN4   | MLLT1     |
| SUN1    | IKZF4     |
| SYVN1   | BAG3      |
| TAF1A   | TTC17     |
| TAF1D   | RREB1     |
| TAF5    | COL4A4    |
| TAF5L   | TMEM131   |
| TANC1   | DCST2     |
| TAP1    | DPF2      |
| TBL1X   | DPF3      |
| TBL1XR1 | GMIP      |
| TBL1Y   | STAM      |
| TBL2    | DPF1      |
| TBP     | PLEKHG3   |
| TBPL1   | PCIF1     |
| TBPL2   | CATSPER1  |
| TDP2    | MED25     |

|           |                 |
|-----------|-----------------|
| TESK1     | KLF15           |
| TLE1      | C2orf78         |
| TLE2      | HJURP           |
| TLE3      | UBR7            |
| TLE4      | NBPF3           |
| TLE6      | ELK1            |
| TLK1      | CCDC132         |
| TLK2      | VLDLR           |
| TLR1      | PRB2            |
| TLR10     | SRL             |
| TLR2      | SEC24D          |
| TLR4      | MAGED4; MAGED4B |
| TLR5      | HOXB2           |
| TLR6      | HOXB3           |
| TLR9      | TSC22D4         |
| TMEM173   | COL9A3          |
| TMF1      | COL9A2          |
| TMPRSS11A | LCP2            |
| TMPRSS11B | THAP4           |
| TMPRSS11D | ARID5A          |
| TMPRSS11E | RPTN            |
| TMPRSS11F | FRS3            |
| TMPRSS12  | VWCE            |
| TMPRSS13  | MBD6            |
| TMPRSS2   | MUC5AC          |
| TMPRSS3   | TSSC4           |
| TMPRSS4   | DMRTB1          |
| TMPRSS5   | COBLL1          |
| TMPRSS6   | MED1            |
| TMPRSS7   | RHOT2           |
| TMPRSS9   | AUTS2           |

|        |           |
|--------|-----------|
| TNKS   | ZMYND8    |
| TNKS2  | HMGN3     |
| TNNI3K | DUX4L2    |
| TPBG   | DUX4L4    |
| TPSAB1 | DUX4L3    |
| TPSB2  | GVINP1    |
| TPSD1  | GOLGA4    |
| TPSG1  | DUX4L6    |
| TRAF7  | UNCX      |
| TRIM11 | FAM90A14P |
| TRIM17 | FAM90A13P |
| TRIM39 | SP6       |
| TRIM65 | SCMH1     |
| TRIO   | FOXO6     |
| TRIP4  | TOP2B     |
| TRPA1  | ARHGAP26  |
| TSKU   | SMTNL1    |
| TSSC1  | ZBTB3     |
| TSSK1B | SP4       |
| TSSK2  | BAIAP2    |
| TSSK3  | NKX1-1    |
| TSSK4  | DOCK3     |
| TYW1B  | EGR3      |
| UACA   | SPATA13   |
| UBB    | PPP1R13B  |
| UBC    | ABLIM1    |
| UBD    | SYCP2     |
| UBL4A  | SLC12A2   |
| UBR5   | ZNF513    |
| ULK1   | AMER3     |
| ULK3   | C9orf131  |

|       |           |
|-------|-----------|
| VASN  | KRTAP16-1 |
| VHL   | E2F7      |
| VHLL  | SS18      |
| WDFY1 | LRCH2     |
| WDFY2 | UBE4B     |
| WDFY3 | ENAH      |
| WDFY4 | CTAGE6    |
| WDHD1 | HOXA9     |
| WDR1  | MIDN      |
| WDR13 | STOX2     |
| WDR16 | HOXA10    |
| WDR17 | RANBP3    |
| WDR18 | ARHGAP33  |
| WDR25 | MTMR8     |
| WDR26 | AVEN      |
| WDR27 | SYNRG     |
| WDR31 | ALG13     |
| WDR37 | PSD       |
| WDR38 | AMBN      |
| WDR47 | FOXD4L1   |
| WDR48 | FOXN2     |
| WDR49 | ARMCX5    |
| WDR52 | CIPC      |
| WDR53 | KIAA0408  |
| WDR55 | CDC42EP1  |
| WDR59 | TNK2      |
| WDR6  | MARCKS    |
| WDR62 | GRIN2D    |
| WDR64 | PIIP5K1   |
| WDR65 | DLX3      |
| WDR7  | KRTAP1-1  |

|         |           |
|---------|-----------|
| WDR72   | TBCD      |
| WDR75   | ZNF800    |
| WDR77   | ZNF765    |
| WDR81   | COLQ      |
| WDR82   | CCDC71    |
| WDR86   | TLX1      |
| WDR88   | KRTAP10-1 |
| WDR90   | C10orf95  |
| WDR91   | ZNF417    |
| WDSUB1  | NKX2-3    |
| WDTC1   | HOXA4     |
| WEE2    | KRTAP13-4 |
| WNK1    | ITPKB     |
| WNK2    | ABL2      |
| WNK3    | EVX2      |
| WNK4    | MSX1      |
| WSB2    | GLIS1     |
| YJEFN3  | YY1AP1    |
| YY1     | KIAA0226L |
| YY2     | NFIC      |
| ZBP1    | ZNF73     |
| ZBTB14  | REPS2     |
| ZBTB16  | PRB3      |
| ZBTB8OS | SPOCD1    |
| ZDHHC13 | PRB4      |
| ZDHHC17 | IRS1      |
| ZFP1    | NPAT      |
| ZFP14   | ARID5B    |
| ZFP2    | SCN2B     |
| ZFP30   | SPICE1    |
| ZFP82   | BBC3      |

|         |          |
|---------|----------|
| ZFP90   | MEF2C    |
| ZFP92   | ANXA7    |
| ZFY     | C4orf17  |
| ZIC2    | ZNF827   |
| ZKSCAN3 | RAB44    |
| ZKSCAN4 | C15orf52 |
| ZKSCAN7 | ZNF474   |
| ZKSCAN8 | RPTOR    |
| ZMAT1   | HN1L     |
| ZMAT4   | SOX30    |
| ZNF10   | AAK1     |
| ZNF121  | PRR35    |
| ZNF136  | PPP1R26  |
| ZNF140  | MIA2     |
| ZNF146  | PPP2R5D  |
| ZNF155  | MYT1L    |
| ZNF165  | LSR      |
| ZNF17   | MAGED1   |
| ZNF177  | WWTR1    |
| ZNF181  | NPAS2    |
| ZNF182  | IQGAP1   |
| ZNF236  | RASL12   |
| ZNF250  | TTC37    |
| ZNF254  | GPRIN2   |
| ZNF259  | TGOLN2   |
| ZNF264  | DVL1P1   |
| ZNF268  | CACNA1G  |
| ZNF271  | SHROOM4  |
| ZNF275  | ASXL1    |
| ZNF28   | ZNF488   |
| ZNF286A | TCRB     |



|         |                      |
|---------|----------------------|
| ZNF286B | AHCTF1               |
| ZNF3    | SEC24B               |
| ZNF30   | SEC24A               |
| ZNF304  | ZEB2                 |
| ZNF311  | FGD3                 |
| ZNF32   | ATP10A               |
| ZNF333  | FAM90A18P; FAM90A19P |
| ZNF33A  | TSHZ3                |
| ZNF35   | RGPD8                |
| ZNF354A | PRR14                |
| ZNF354C | FAM171A2             |
| ZNF366  | FAM181B              |
| ZNF383  | KRTAP13-2            |
| ZNF391  | NEFH                 |
| ZNF397  | ZNF804A              |
| ZNF398  | KRTAP10-7            |
| ZNF410  | GAB2                 |
| ZNF415  | ERRFI1               |
| ZNF419  | SNAI3                |
| ZNF423  | SARG                 |
| ZNF425  | SHB                  |
| ZNF426  | ZCWPW1               |
| ZNF430  | COL19A1              |
| ZNF439  | FSCB                 |
| ZNF44   | CABLES1              |
| ZNF442  | COL11A1              |
| ZNF460  | COL6A1               |
| ZNF468  | KRTAP24-1            |
| ZNF479  | CCSAP                |
| ZNF485  | TREML2               |
| ZNF486  | TRAFD1               |

ZNF492  
ZNF493  
ZNF501  
ZNF506  
ZNF517  
ZNF525  
ZNF527  
ZNF529  
ZNF543  
ZNF547  
ZNF550  
ZNF558  
ZNF565  
ZNF566  
ZNF570  
ZNF580  
ZNF582  
ZNF583  
ZNF594  
ZNF596  
ZNF600  
ZNF611  
ZNF614  
ZNF619  
ZNF623  
ZNF626  
ZNF629  
ZNF646  
ZNF66  
ZNF660  
ZNF662

ZNF202  
HOXC9  
HOXC13  
HOXA11  
MAP10  
NUP98  
TRIM66  
ZNF609  
ARHGEF10  
NCAPG2  
MLPH  
FOXQ1  
VSX1  
C1orf106  
EPS15L1  
COL2A1  
FAM90A22P  
COL1A1  
SOX1  
ZDHHC5  
EEA1  
CDCA2  
GAGE2E  
SYN1  
FOXM1  
ZNF284  
MAP3K12  
GSX2  
ELF1  
ZNF785  
KLF3

|         |           |
|---------|-----------|
| ZNF664  | KRTAP12-4 |
| ZNF665  | ZNF703    |
| ZNF670  | NPAS3     |
| ZNF671  | C19orf57  |
| ZNF674  | ZAR1L     |
| ZNF675  | ARMC3     |
| ZNF676  | CAMSAP1   |
| ZNF680  | HOXD10    |
| ZNF682  | ZNF185    |
| ZNF691  | MAX       |
| ZNF697  | HOXD9     |
| ZNF701  | SMARCC1   |
| ZNF708  | GAREM     |
| ZNF709  | PLAG1     |
| ZNF714  | STAG1     |
| ZNF728  | DAXX      |
| ZNF730  | GLCCI1    |
| ZNF737  | LMTK3     |
| ZNF749  | CTNNA1    |
| ZNF761  | HRNR      |
| ZNF771  | SNED1     |
| ZNF772  | ARHGEF40  |
| ZNF780A | HIST1H1D  |
| ZNF792  | COL28A1   |
| ZNF805  | DCLRE1C   |
| ZNF814  | NEO1      |
| ZNF835  | MAP6      |
| ZNF836  | PPP4R4    |
| ZNF840P | SEC16B    |
| ZNF846  | PARP10    |
| ZNF85   | ATN1      |

|         |          |
|---------|----------|
| ZNF850  | ASAP2    |
| ZNF860  | FGD1     |
| ZNF879  | ZNF395   |
| ZNF883  | FOXB1    |
| ZNF888  | BAG6     |
| ZNF90   | CEP152   |
| ZNF91   | SRRM5    |
| ZNF99   | ZNF445   |
| ZNRF3   | ZNF302   |
| ZNRF4   | ARHGEF15 |
| ZSCAN20 | MAP7D3   |
| ZSCAN30 | OSR1     |
| ZSCAN32 | TLX3     |
| ZSCAN5B | MUC7     |
| ZXDB    | CHAT     |
| ZXDC    | TMC3     |
|         | PEG3     |
|         | KLF2     |
|         | ISM2     |
|         | OLFML2B  |
|         | WTIP     |
|         | GTF2IRD1 |
|         | KIAA0825 |
|         | DMRT1    |
|         | INO80D   |
|         | PIP5K1A  |
|         | RFX5     |
|         | BORA     |
|         | ADAM23   |
|         | MDFI     |
|         | TMCC1    |

|  |  |  |           |
|--|--|--|-----------|
|  |  |  | PSRC1     |
|  |  |  | ZNF334    |
|  |  |  | NPIPB5    |
|  |  |  | SYTL2     |
|  |  |  | TBC1D3G   |
|  |  |  | NCKAP5L   |
|  |  |  | TWIST1    |
|  |  |  | FOXL2     |
|  |  |  | COL27A1   |
|  |  |  | DACT3     |
|  |  |  | MEOX2     |
|  |  |  | MEOX1     |
|  |  |  | ATP8B2    |
|  |  |  | FAM189A1  |
|  |  |  | TBCEL     |
|  |  |  | LRRC16B   |
|  |  |  | ERCC6L2   |
|  |  |  | CREB1     |
|  |  |  | RFX1      |
|  |  |  | PHC2      |
|  |  |  | PLEKHN1   |
|  |  |  | KIAA1549L |
|  |  |  | ATG9A     |
|  |  |  | RNF25     |
|  |  |  | CGNL1     |
|  |  |  | FOXI3     |
|  |  |  | RPL37AP8  |
|  |  |  | CEL       |
|  |  |  | QRICH2    |
|  |  |  | CEBPA     |
|  |  |  | NUMA1     |

|  |  |              |
|--|--|--------------|
|  |  | AHDC1        |
|  |  | CTCF         |
|  |  | COL6A2       |
|  |  | C1QTNF9      |
|  |  | TICAM1       |
|  |  | FOXF1        |
|  |  | TRIOBP       |
|  |  | HOXD3        |
|  |  | HRES1        |
|  |  | NKX2-5       |
|  |  | GBX2         |
|  |  | LBX1         |
|  |  | HSFX1; HSFX2 |
|  |  | SCARF2       |
|  |  | ADGRF5       |
|  |  | EMILIN2      |
|  |  | KLF12        |
|  |  | ACRC         |
|  |  | USP54        |
|  |  | ZBTB46       |
|  |  | PNRC1        |
|  |  | KIAA1211     |
|  |  | POU2F1       |
|  |  | PROSER2      |
|  |  | CEP170       |
|  |  | WIPF3        |
|  |  | ZNF101       |
|  |  | ZNF414       |
|  |  | GPRASP1      |
|  |  | ARHGAP32     |
|  |  | ROBO1        |

|  |  |  |           |
|--|--|--|-----------|
|  |  |  | PRR22     |
|  |  |  | FOXO4     |
|  |  |  | FEZF1     |
|  |  |  | TET3      |
|  |  |  | ARHGAP44  |
|  |  |  | HOXC6     |
|  |  |  | KSR2      |
|  |  |  | SPECC1    |
|  |  |  | PLCL1     |
|  |  |  | KRTAP5-5  |
|  |  |  | COL6A5    |
|  |  |  | GSG2      |
|  |  |  | WIPF2     |
|  |  |  | CAND1     |
|  |  |  | FAM90A5P  |
|  |  |  | SPATA31A5 |
|  |  |  | TCF3      |
|  |  |  | COL1A2    |
|  |  |  | HOXA6     |
|  |  |  | FBF1      |
|  |  |  | ASB16-AS1 |
|  |  |  | NR1D1     |
|  |  |  | HP1BP3    |
|  |  |  | SDE2      |
|  |  |  | LINC00271 |
|  |  |  | SUPT20HL2 |
|  |  |  | FAM90A15P |
|  |  |  | C1QTNF3   |
|  |  |  | FAM133A   |
|  |  |  | CAPN15    |
|  |  |  | FOXS1     |

|  |  |          |
|--|--|----------|
|  |  | VGLL4    |
|  |  | KLF14    |
|  |  | MAGEE2   |
|  |  | NECAP2   |
|  |  | MAGI1    |
|  |  | CDCA3    |
|  |  | NID1     |
|  |  | SPTBN1   |
|  |  | OFD1     |
|  |  | IRX5     |
|  |  | KRTAP5-2 |
|  |  | CBLL1    |
|  |  | FAM110D  |
|  |  | FAM47E   |
|  |  | CLIC6    |
|  |  | VAX1     |
|  |  | ARHGAP29 |
|  |  | CCDC158  |
|  |  | ATP8B1   |
|  |  | SP8      |
|  |  | FOXO3    |
|  |  | DNAJC6   |
|  |  | FAM189B  |
|  |  | TIMELESS |
|  |  | CBLB     |
|  |  | FRS2     |
|  |  | FAM53B   |
|  |  | SASH1    |
|  |  | C10orf12 |
|  |  | C4orf47  |
|  |  | KIAA2022 |



|  |  |  |                      |
|--|--|--|----------------------|
|  |  |  | TPRXL                |
|  |  |  | EN2                  |
|  |  |  | LRRC8E               |
|  |  |  | SLC4A2               |
|  |  |  | LDB3                 |
|  |  |  | ADAM9                |
|  |  |  | OTUD5                |
|  |  |  | ADAM15               |
|  |  |  | MYBL1                |
|  |  |  | VGLL3                |
|  |  |  | NCOA2                |
|  |  |  | MYBL2                |
|  |  |  | ID1                  |
|  |  |  | ETV4                 |
|  |  |  | PHF23                |
|  |  |  | FRMD4B               |
|  |  |  | SLC4A3               |
|  |  |  | FAM90A16P; FAM90A17P |
|  |  |  | FAM83G               |
|  |  |  | C17orf100            |
|  |  |  | NAA25                |
|  |  |  | CD7                  |
|  |  |  | KANSL1               |
|  |  |  | SSBP2                |
|  |  |  | PHACTR3              |
|  |  |  | C6orf15              |
|  |  |  | ITPKC                |
|  |  |  | AMER2                |
|  |  |  | MLLT10               |
|  |  |  | FAN1                 |
|  |  |  | RSPH6A               |

|  |  |           |
|--|--|-----------|
|  |  | KRTAP19-1 |
|  |  | RLTPR     |
|  |  | PRR36     |
|  |  | ZNF514    |
|  |  | LTBP3     |
|  |  | PNMAL2    |
|  |  | STON2     |
|  |  | SCUBE2    |
|  |  | ZNF219    |
|  |  | ZNF502    |
|  |  | EPB41L1   |
|  |  | PPP1R7    |
|  |  | MICALL2   |
|  |  | RIMBP2    |
|  |  | KIF7      |
|  |  | FOXK1     |
|  |  | FAM166A   |
|  |  | C17orf59  |
|  |  | RAB11FIP2 |
|  |  | ZBTB18    |
|  |  | DCLRE1A   |
|  |  | POU2AF1   |
|  |  | MCTP1     |
|  |  | SIN3A     |
|  |  | TPRN      |
|  |  | C17orf96  |
|  |  | HUWE1     |
|  |  | POLD3     |
|  |  | SRF       |
|  |  | PODXL     |
|  |  | SMCP      |

|  |  |          |
|--|--|----------|
|  |  | DLGAP2   |
|  |  | LPP      |
|  |  | TACC3    |
|  |  | PPP1R18  |
|  |  | LRP3     |
|  |  | FAM47A   |
|  |  | GATA6    |
|  |  | CCDC8    |
|  |  | USP53    |
|  |  | GPR152   |
|  |  | ZNF384   |
|  |  | SIRPD    |
|  |  | ARMCX2   |
|  |  | PDZD4    |
|  |  | C16orf71 |
|  |  | ZNF644   |
|  |  | C7orf57  |
|  |  | RAD54L   |
|  |  | ADAMTS7  |
|  |  | PVRL2    |
|  |  | KLF16    |
|  |  | GATB     |
|  |  | APBB2    |
|  |  | ZYX      |
|  |  | TNS3     |
|  |  | COL4A2   |
|  |  | TNFAIP3  |
|  |  | CKAP2L   |
|  |  | CD14     |
|  |  | ELF4     |
|  |  | CHTF8    |

|  |  |  |                |
|--|--|--|----------------|
|  |  |  | SPAG8          |
|  |  |  | LGI2           |
|  |  |  | PROL1          |
|  |  |  | ZFPM2          |
|  |  |  | ZNF786         |
|  |  |  | IQSEC2         |
|  |  |  | WIPF1          |
|  |  |  | RABL6          |
|  |  |  | EFS            |
|  |  |  | RIN2           |
|  |  |  | LIMA1          |
|  |  |  | CITED4         |
|  |  |  | LRRC30         |
|  |  |  | NKX6-3         |
|  |  |  | DUX4L5         |
|  |  |  | TGIF1          |
|  |  |  | SSH2           |
|  |  |  | SENP3          |
|  |  |  | H1FOO          |
|  |  |  | SLC9A1         |
|  |  |  | CRAMP1L        |
|  |  |  | GAGE2B; GAGE2C |
|  |  |  | COL5A2         |
|  |  |  | TNK1           |
|  |  |  | GPRIN1         |
|  |  |  | DTX1           |
|  |  |  | SHANK2         |
|  |  |  | SPATA31A1      |
|  |  |  | HTT            |
|  |  |  | COBL           |
|  |  |  | FAM53A         |

|  |  |  |           |
|--|--|--|-----------|
|  |  |  | TBC1D12   |
|  |  |  | TREM2     |
|  |  |  | LRGUK     |
|  |  |  | PHLDB2    |
|  |  |  | MTUS2     |
|  |  |  | EVX1      |
|  |  |  | ELF2      |
|  |  |  | RAI2      |
|  |  |  | LRRD1     |
|  |  |  | FAM90A24P |
|  |  |  | TBC1D3H   |
|  |  |  | IKZF5     |
|  |  |  | BTAF1     |
|  |  |  | ODF3L1    |
|  |  |  | ODF3      |
|  |  |  | MLK4      |
|  |  |  | SSFA2     |
|  |  |  | ZNF567    |
|  |  |  | TMIGD2    |
|  |  |  | ALX3      |
|  |  |  | ZKSCAN5   |
|  |  |  | KLHDC7B   |
|  |  |  | TEX11     |
|  |  |  | DNMBP     |
|  |  |  | SKIDA1    |
|  |  |  | TNS2      |
|  |  |  | RACGAP1   |
|  |  |  | ESYT3     |
|  |  |  | LIAT1     |
|  |  |  | MAVS      |
|  |  |  | TUB       |

|  |  |  |           |
|--|--|--|-----------|
|  |  |  | INSM2     |
|  |  |  | PMFBP1    |
|  |  |  | SPTBN2    |
|  |  |  | BAI1      |
|  |  |  | POM121L1P |
|  |  |  | NRG2      |
|  |  |  | SOCS7     |
|  |  |  | COIL      |
|  |  |  | PDS5A     |
|  |  |  | FAM21D    |
|  |  |  | ZNF438    |
|  |  |  | ANLN      |
|  |  |  | TMEM181   |
|  |  |  | ZMIZ2     |
|  |  |  | TAB3      |
|  |  |  | DMTN      |
|  |  |  | HOXA5     |
|  |  |  | SAMSN1    |
|  |  |  | MMTAG2    |
|  |  |  | EPC1      |
|  |  |  | CD300LD   |
|  |  |  | NLGN2     |
|  |  |  | SPRR2A    |
|  |  |  | PLEKHG2   |
|  |  |  | VCL       |
|  |  |  | CCNA1     |
|  |  |  | FAM90A23P |
|  |  |  | CHRD      |
|  |  |  | KRTAP9-1  |
|  |  |  | GAREML    |
|  |  |  | NRL       |

|  |  |           |
|--|--|-----------|
|  |  | ZBTB22    |
|  |  | TLN1      |
|  |  | PARG      |
|  |  | SREBF2    |
|  |  | MARCKSL1  |
|  |  | SNAP91    |
|  |  | PDS5B     |
|  |  | SRGAP1    |
|  |  | TCEAL2    |
|  |  | RFX4      |
|  |  | CCDC178   |
|  |  | FRMD6-AS1 |
|  |  | NFATC3    |
|  |  | PRUNE2    |
|  |  | PER1      |
|  |  | ZNF469    |
|  |  | SUPT20HL1 |
|  |  | RAD54L2   |
|  |  | CECR2     |
|  |  | RAB11FIP5 |
|  |  | FLII      |
|  |  | SP100     |
|  |  | LOR       |
|  |  | CCDC40    |
|  |  | ESCO1     |
|  |  | HOXB1     |
|  |  | HOXD12    |
|  |  | STOX1     |
|  |  | ENAM      |
|  |  | STPG2     |
|  |  | FAM90A1   |

|  |  |           |
|--|--|-----------|
|  |  | HLX       |
|  |  | ABI2      |
|  |  | ERVK-9    |
|  |  | PTPN12    |
|  |  | KLF17     |
|  |  | EP400NL   |
|  |  | KLF4      |
|  |  | NHSL1     |
|  |  | CACNB3    |
|  |  | PHF1      |
|  |  | ADAM12    |
|  |  | ARHGAP6   |
|  |  | ZNF704    |
|  |  | ZMYM2     |
|  |  | ESX1      |
|  |  | BCL9L     |
|  |  | INPP5J    |
|  |  | SREBF1    |
|  |  | KIAA1671  |
|  |  | DUSP16    |
|  |  | SGK223    |
|  |  | FAM193B   |
|  |  | LINC01465 |
|  |  | FAM168B   |
|  |  | KRTAP5-11 |
|  |  | KRTAP5-10 |
|  |  | CCDC85A   |
|  |  | DVL1      |
|  |  | DVL2      |
|  |  | GRIN2C    |
|  |  | FAM110A   |



|  |  |                   |
|--|--|-------------------|
|  |  | RP1L1             |
|  |  | FEZF2             |
|  |  | MAMSTR            |
|  |  | PLEKHH1           |
|  |  | KRTAP1-5          |
|  |  | SPRR2D            |
|  |  | CCNY              |
|  |  | COL13A1           |
|  |  | FAM90A10P         |
|  |  | DLGAP5            |
|  |  | BMP2KL            |
|  |  | SP7               |
|  |  | DTX2              |
|  |  | AEBP2             |
|  |  | NO66              |
|  |  | C15orf39          |
|  |  | SOX4              |
|  |  | ZFYVE16           |
|  |  | PRDM8             |
|  |  | SMARCD1           |
|  |  | ERVK-11           |
|  |  | ZNF784            |
|  |  | SYNE1             |
|  |  | BARX2             |
|  |  | FAM196A           |
|  |  | ATP8B3            |
|  |  | C1orf174          |
|  |  | DACT2             |
|  |  | TROAP             |
|  |  | CXorf49; CXorf49B |
|  |  | SPTAN1            |

|  |  |          |
|--|--|----------|
|  |  | KLF13    |
|  |  | ZAR1     |
|  |  | CSF1     |
|  |  | MED12    |
|  |  | AHR      |
|  |  | FGD6     |
|  |  | RPRD2    |
|  |  | ADAMTSL4 |
|  |  | FAM217B  |
|  |  | FAM171A1 |
|  |  | RUSC1    |
|  |  | MAGEL2   |
|  |  | GPRASP2  |
|  |  | IGHV3-23 |
|  |  | TBC1D14  |
|  |  | GATA1    |
|  |  | OTX1     |
|  |  | TCP11L2  |
|  |  | EN1      |
|  |  | C2CD4C   |
|  |  | PAGE1    |
|  |  | TCEAL3   |
|  |  | PAGE3    |
|  |  | PTGS2    |
|  |  | PCDH11X  |
|  |  | CTAGE4   |
|  |  | EVPL     |
|  |  | CDX2     |
|  |  | MB21D1   |
|  |  | DAB2     |
|  |  | BHLHB9   |

|  |  |          |
|--|--|----------|
|  |  | NFE2L3   |
|  |  | SH3D19   |
|  |  | LRRC56   |
|  |  | RIN3     |
|  |  | C1orf167 |
|  |  | ST5      |
|  |  | TULP4    |
|  |  | GATA4    |
|  |  | MAPK8IP2 |
|  |  | MIS18BP1 |
|  |  | LRRC63   |
|  |  | ABLIM3   |
|  |  | LTBP1    |
|  |  | YAP1     |
|  |  | EGR4     |
|  |  | MYOCD    |
|  |  | MTMR4    |
|  |  | UTRN     |
|  |  | OTUD7B   |
|  |  | PCED1B   |
|  |  | ERF      |
|  |  | PRC1     |
|  |  | DPY19L2  |
|  |  | VCX2     |
|  |  | DBX1     |
|  |  | SCARF1   |
|  |  | SAGE2P   |
|  |  | BICD1    |
|  |  | COL6A6   |
|  |  | MAGI3    |
|  |  | MAMLD1   |

|  |  |           |
|--|--|-----------|
|  |  | ATG13     |
|  |  | PTPN23    |
|  |  | EPC2      |
|  |  | ZNF750    |
|  |  | SH3RF3    |
|  |  | PEF1      |
|  |  | NFRKB     |
|  |  | WIZ       |
|  |  | ZMYM6     |
|  |  | PPP5K2    |
|  |  | MTSS1     |
|  |  | ATMIN     |
|  |  | ETV3      |
|  |  | ETV5      |
|  |  | MEF2A     |
|  |  | FAM110C   |
|  |  | MAPK1IP1L |
|  |  | HIF3A     |
|  |  | SLCO4A1   |
|  |  | PRICKLE2  |
|  |  | PHF21A    |
|  |  | YLPM1     |
|  |  | PRR12     |
|  |  | NUMB      |
|  |  | POM121L2  |
|  |  | C9orf47   |
|  |  | LZTS2     |
|  |  | MXRA8     |
|  |  | C17orf74  |
|  |  | MAGI2     |
|  |  | INO80     |

|  |  |           |
|--|--|-----------|
|  |  | SCRT2     |
|  |  | FAM63B    |
|  |  | MUM1L1    |
|  |  | RFX7      |
|  |  | C8orf34   |
|  |  | NTN3      |
|  |  | COL5A1    |
|  |  | HIST1H1C  |
|  |  | BMP2K     |
|  |  | SAMD1     |
|  |  | DMKN      |
|  |  | PDLIM7    |
|  |  | FLG2      |
|  |  | ADGRL2    |
|  |  | CCSER1    |
|  |  | CYS1      |
|  |  | PRR19     |
|  |  | CBX4      |
|  |  | MEN1      |
|  |  | COL14A1   |
|  |  | CCBE1     |
|  |  | IGKV1D-16 |
|  |  | FAM90A2P  |
|  |  | ZNF281    |
|  |  | CXXC4     |
|  |  | PTPN4     |
|  |  | PERM1     |
|  |  | PHACTR4   |
|  |  | ZNF34     |
|  |  | C12orf74  |
|  |  | TBR1      |

|  |  |           |
|--|--|-----------|
|  |  | TAL1      |
|  |  | HHIPL1    |
|  |  | KANSL3    |
|  |  | COL10A1   |
|  |  | GIGYF2    |
|  |  | ASAP3     |
|  |  | MYB       |
|  |  | NKX2-4    |
|  |  | CFP       |
|  |  | SNRPGP15  |
|  |  | ZNF367    |
|  |  | DLGAP3    |
|  |  | RIMS2     |
|  |  | PXN       |
|  |  | PRR33     |
|  |  | KTN1      |
|  |  | ARFGAP2   |
|  |  | DFNB31    |
|  |  | FAM90A12P |
|  |  | HOXB13    |
|  |  | PRAM1     |
|  |  | C16orf86  |
|  |  | PDLIM3    |
|  |  | KLF7      |
|  |  | GAGE3     |
|  |  | NR2C2     |
|  |  | GAGE1     |
|  |  | CCDC9     |
|  |  | GAGE5     |
|  |  | GAGE4     |
|  |  | HOXD4     |

|  |  |          |
|--|--|----------|
|  |  | HOXC4    |
|  |  | NUTM2A   |
|  |  | COL21A1  |
|  |  | KIAA0226 |
|  |  | ARAP1    |
|  |  | ERVK-18  |
|  |  | ATXN7L1  |
|  |  | GLIS3    |
|  |  | GALR3    |
|  |  | SP9      |
|  |  | CTAGE8   |
|  |  | GPR156   |
|  |  | MDFIC    |
|  |  | ADGRL1   |
|  |  | SOX3     |
|  |  | NFAT5    |
|  |  | LRRC36   |
|  |  | RFX2     |
|  |  | ST18     |
|  |  | SPINT1   |
|  |  | INF2     |
|  |  | SNX18    |
|  |  | GSX1     |
|  |  | AATK     |
|  |  | TRAPPC12 |
|  |  | ZNF207   |
|  |  | VEZF1    |
|  |  | TNFRSF1B |
|  |  | RSBN1L   |
|  |  | IRF2BP1  |
|  |  | GNAS     |

|  |  |  |             |
|--|--|--|-------------|
|  |  |  | TCF7L1      |
|  |  |  | EPB41L4A    |
|  |  |  | C19orf44    |
|  |  |  | ERBB2IP     |
|  |  |  | MAML2       |
|  |  |  | CEP68       |
|  |  |  | EPN3        |
|  |  |  | GAB1        |
|  |  |  | ZNF296      |
|  |  |  | ARHGEF19    |
|  |  |  | CAND2       |
|  |  |  | TSC22D2     |
|  |  |  | ZNF597      |
|  |  |  | ABI1        |
|  |  |  | CNGB1       |
|  |  |  | TBC1D3      |
|  |  |  | PROCA1      |
|  |  |  | TSC22D1     |
|  |  |  | CSNK1G2-AS1 |
|  |  |  | COL9A1      |
|  |  |  | ARHGEF9     |
|  |  |  | ZSCAN12     |
|  |  |  | EYA3        |
|  |  |  | C11orf53    |
|  |  |  | GAS2L1      |
|  |  |  | ZNF804B     |
|  |  |  | CYFIP2      |
|  |  |  | COL5A3      |
|  |  |  | GATAD2A     |
|  |  |  | NISCH       |
|  |  |  | AJUBA       |



|  |  |  |           |
|--|--|--|-----------|
|  |  |  | KRTAP9-2  |
|  |  |  | RSU1      |
|  |  |  | CRTC3     |
|  |  |  | KRTAP4-12 |
|  |  |  | AGFG2     |
|  |  |  | TOPORS    |
|  |  |  | KIAA2026  |
|  |  |  | ZNF575    |
|  |  |  | C3orf30   |
|  |  |  | APBB1IP   |
