# Supplementary material for: Genome-wide survey of putative RNA-binding proteins encoded in the human proteome
Source: Royal Society of Chemistry journal article supplement (doi:10.1039/c5mb00638d), 2015-11-30
Supplement: c5mb00638d1.zip [file c5mb00638d1.zip]

**Supplementary Table 8:** Classification of the 1097 putative novel RNA-binding proteins in the human genome that were identified in our study.

| Proteins annotated as RNA-binding |        |                                                                                                                                                                                                                                                                                                                  |                                                                                                                                                                                                                                                                                                                                                                        |
|-----------------------------------|--------|------------------------------------------------------------------------------------------------------------------------------------------------------------------------------------------------------------------------------------------------------------------------------------------------------------------|------------------------------------------------------------------------------------------------------------------------------------------------------------------------------------------------------------------------------------------------------------------------------------------------------------------------------------------------------------------------|
| Serial number                     | Entry  | Protein name                                                                                                                                                                                                                                                                                                     | GO annotation (molecular function)                                                                                                                                                                                                                                                                                                                                     |
| [1]                               | Q6NUM6 | S-adenosyl-L-methionine-dependent tRNA 4-demethylwyosine synthase (EC 4.1.3.44) (Radical S-adenosyl methionine and flavodoxin domain-containing protein 2) (tRNA wybutosine-synthesizing protein 1 homolog B)                                                                                                    | 4 iron, 4 sulfur cluster binding [GO:0051539]; FMN binding [GO:0010181]; iron ion binding [GO:0005506]; lyase activity [GO:0016829]; oxidoreductase activity [GO:0016491]                                                                                                                                                                                              |
| [2]                               | O95551 | Tyrosyl-DNA phosphodiesterase 2 (Tyr-DNA phosphodiesterase 2) (hTDP2) (EC 3.1.4.-) (5'-tyrosyl-DNA phosphodiesterase) (5'-Tyr-DNA phosphodiesterase) (ETS1-associated protein 2) (ETS1-associated protein II) (EAPII) (TRAF and TNF receptor-associated protein) (Tyrosyl-RNA phosphodiesterase) (VPg unlinkase) | 5'-tyrosyl-DNA phosphodiesterase activity [GO:0070260]; magnesium ion binding [GO:0000287]; manganese ion binding [GO:0030145]; nuclease activity [GO:0004518]; single-stranded DNA binding [GO:0003697]; transcription corepressor activity [GO:0003714]; tyrosyl-RNA phosphodiesterase activity [GO:0036317]                                                         |
| [3]                               | P31146 | Coronin-1A (Coronin-like protein A) (Clipin-A) (Coronin-like protein p57) (Tryptophan aspartate-containing coat protein) (TACO)                                                                                                                                                                                  | actin binding [GO:0003779]; actin filament binding [GO:0051015]; actin monomer binding [GO:0003785]; cytoskeletal protein binding [GO:0008092]; myosin heavy chain binding [GO:0032036]; phosphatidylinositol 3-kinase binding [GO:0043548]; poly(A) RNA binding [GO:0044822]; protein C-terminus binding [GO:0008022]; protein homodimerization activity [GO:0042803] |
| [4]                               | A6NEY8 | Putative prolyl-tRNA synthetase associated domain-containing protein 1 (PrdX deacylase domain-containing protein 1) (Prolyl-tRNA synthetase associated domain-containing protein 1 pseudogene)                                                                                                                   | aminoacyl-tRNA editing activity [GO:0002161]                                                                                                                                                                                                                                                                                                                           |
| [5]                               | Q96FN9 | Probable D-tyrosyl-tRNA(Tyr) deacylase 2 (EC 3.1.-.-) (D-tyrosyl-tRNA deacylase 2)                                                                                                                                                                                                                               | aminoacyl-tRNA editing activity [GO:0002161]; D-tyrosyl-tRNA(Tyr) deacylase activity [GO:0051500]                                                                                                                                                                                                                                                                      |
| [6]                               | Q8TEA8 | D-tyrosyl-tRNA(Tyr) deacylase 1 (EC 3.1.-.-) (DNA-unwinding element-binding protein B) (DUE-B) (Histidyl-tRNA synthase-related)                                                                                                                                                                                  | aminoacyl-tRNA editing activity [GO:0002161]; DNA binding [GO:0003677]; D-tyrosyl-tRNA(Tyr) deacylase activity [GO:0051500]; metal ion binding [GO:0046872]                                                                                                                                                                                                            |
| [7]                               | Q15149 | Plectin (PCN) (PLTN) (Hemidesmosomal protein 1) (HD1) (Plectin-1)                                                                                                                                                                                                                                                | ankyrin binding [GO:0030506]; poly(A) RNA binding [GO:0044822]; structural constituent of muscle [GO:0008307]                                                                                                                                                                                                                                                          |
| [8]                               | O95260 | Arginyl-tRNA--protein transferase 1 (Arginyltransferase 1) (R-transferase 1) (EC 2.3.2.8) (Arginine-tRNA--protein transferase 1)                                                                                                                                                                                 | arginyltransferase activity [GO:0004057]                                                                                                                                                                                                                                                                                                                               |
| [9]                               | Q8N3C0 | Activating signal cointegrator 1 complex subunit 3 (EC 3.6.4.12) (ASC-1 complex subunit p200) (ASC1p200) (Helicase, ATP binding 1) (Trip4 complex subunit p200)                                                                                                                                                  | ATP binding [GO:0005524]; ATP-dependent 3'-5' DNA helicase activity [GO:0043140]; poly(A) RNA binding [GO:0044822]                                                                                                                                                                                                                                                     |
| [10]                              | Q8IYD8 | Fanconi anemia group M protein (Protein FACM) (EC 3.6.4.13) (ATP-dependent RNA helicase FANCM) (Fanconi anemia-associated polypeptide of 250 kDa) (FAAP250) (Protein Hef ortholog)                                                                                                                               | ATP binding [GO:0005524]; chromatin binding [GO:0003682]; DNA binding [GO:0003677]; helicase activity [GO:0004386]; nuclease activity [GO:0004518]                                                                                                                                                                                                                     |
| [11]                              | P21127 | Cyclin-dependent kinase 11B (EC 2.7.11.22) (Cell division cycle 2-like protein kinase 1) (CLK-1) (Cell division protein kinase 11B) (Galactosyltransferase-associated protein kinase p58/GTA) (PITSLRE serine/threonine-protein kinase CDC2L1) (p58 CLK-1)                                                       | ATP binding [GO:0005524]; cyclin-dependent protein serine/threonine kinase activity [GO:0004693]; poly(A) RNA binding [GO:0044822]; protein kinase activity [GO:0004672]; protein serine/threonine kinase activity [GO:0004674]                                                                                                                                        |
| [12]                              | Q7KZI7 | Serine/threonine-protein kinase MARK2 (EC                                                                                                                                                                                                                                                                        | ATP binding [GO:0005524]; lipid binding                                                                                                                                                                                                                                                                                                                                |

|      |        |                                                                                                                                                                                                                                                                                                                       |                                                                                                                                                                                                                                                                                                                                                        |
|------|--------|-----------------------------------------------------------------------------------------------------------------------------------------------------------------------------------------------------------------------------------------------------------------------------------------------------------------------|--------------------------------------------------------------------------------------------------------------------------------------------------------------------------------------------------------------------------------------------------------------------------------------------------------------------------------------------------------|
|      |        | 2.7.11.1) (EC 2.7.11.26) (ELKL motif kinase 1) (EMK-1) (MAP/microtubule affinity-regulating kinase 2) (PAR1 homolog) (PAR1 homolog b) (Par-1b) (Par1b)                                                                                                                                                                | [GO:0008289]; magnesium ion binding [GO:0000287]; poly(A) RNA binding [GO:0044822]; protein kinase activator activity [GO:0030295]; protein serine/threonine kinase activity [GO:0004674]; tau-protein kinase activity [GO:0050321]                                                                                                                    |
| [13] | O75116 | Rho-associated protein kinase 2 (EC 2.7.11.1) (Rho kinase 2) (Rho-associated, coiled-coil-containing protein kinase 2) (Rho-associated, coiled-coil-containing protein kinase II) (ROCK-II) (p164 ROCK-2)                                                                                                             | ATP binding [GO:0005524]; metal ion binding [GO:0046872]; poly(A) RNA binding [GO:0044822]; protein serine/threonine kinase activity [GO:0004674]; Rho-dependent protein serine/threonine kinase activity [GO:0072518]; structural molecule activity [GO:0005198]                                                                                      |
| [14] | Q9BSD7 | Cancer-related nucleoside-triphosphatase (NTPase) (EC 3.6.1.15) (Nucleoside triphosphate phosphohydrolase)                                                                                                                                                                                                            | ATP binding [GO:0005524]; nucleoside-triphosphatase activity [GO:0017111]; nucleotide phosphatase activity, acting on free nucleotides [GO:0098519]; poly(A) RNA binding [GO:0044822]                                                                                                                                                                  |
| [15] | O75717 | WD repeat and HMG-box DNA-binding protein 1 (Acidic nucleoplasmic DNA-binding protein 1) (And-1)                                                                                                                                                                                                                      | chromatin binding [GO:0003682]; DNA binding [GO:0003677]; RNA binding [GO:0003723]                                                                                                                                                                                                                                                                     |
| [16] | Q8IZL8 | Proline-, glutamic acid- and leucine-rich protein 1 (Modulator of non-genomic activity of estrogen receptor) (Transcription factor HMX3)                                                                                                                                                                              | chromatin binding [GO:0003682]; poly(A) RNA binding [GO:0044822]; transcription factor binding [GO:0008134]                                                                                                                                                                                                                                            |
| [17] | Q9NUX5 | Protection of telomeres protein 1 (hPot1) (POT1-like telomere end-binding protein)                                                                                                                                                                                                                                    | DEAD/H-box RNA helicase binding [GO:0017151]; G-rich strand telomeric DNA binding [GO:0098505]; single-stranded telomeric DNA binding [GO:0043047]; telomerase inhibitor activity [GO:0010521]                                                                                                                                                         |
| [18] | Q9UH17 | DNA dC->dU-editing enzyme APOBEC-3B (A3B) (EC 3.5.4.-) (Phorbolin-1-related protein) (Phorbolin-2/3)                                                                                                                                                                                                                  | deoxycytidine deaminase activity [GO:0047844]; poly(A) RNA binding [GO:0044822]; zinc ion binding [GO:0008270]                                                                                                                                                                                                                                         |
| [19] | Q92966 | snRNA-activating protein complex subunit 3 (SNAPc subunit 3) (Proximal sequence element-binding transcription factor subunit beta) (PSE-binding factor subunit beta) (PTF subunit beta) (Small nuclear RNA-activating complex polypeptide 3) (snRNA-activating protein complex 50 kDa subunit) (SNAPc 50 kDa subunit) | DNA binding [GO:0003677]                                                                                                                                                                                                                                                                                                                               |
| [20] | Q9H171 | Z-DNA-binding protein 1 (Tumor stroma and activated macrophage protein DLM-1)                                                                                                                                                                                                                                         | DNA binding [GO:0003677]; double-stranded RNA adenosine deaminase activity [GO:0003726]; left-handed Z-DNA binding [GO:0003692]; RNA binding [GO:0003723]                                                                                                                                                                                              |
| [21] | O60381 | HMG box-containing protein 1 (HMG box transcription factor 1) (High mobility group box transcription factor 1)                                                                                                                                                                                                        | DNA binding [GO:0003677]; RNA binding [GO:0003723]                                                                                                                                                                                                                                                                                                     |
| [22] | Q96IC2 | Putative RNA exonuclease NEF-sp (EC 3.1.-.-)                                                                                                                                                                                                                                                                          | exonuclease activity [GO:0004527]; nucleotide binding [GO:0000166]; RNA binding [GO:0003723]                                                                                                                                                                                                                                                           |
| [23] | P07585 | Decorin (Bone proteoglycan II) (PG-S2) (PG40)                                                                                                                                                                                                                                                                         | extracellular matrix binding [GO:0050840]; glycosaminoglycan binding [GO:0005539]; poly(A) RNA binding [GO:0044822]                                                                                                                                                                                                                                    |
| [24] | Q6NYC1 | Bifunctional arginine demethylase and lysyl-hydroxylase JMJD6 (EC 1.14.11.-) (Histone arginine demethylase JMJD6) (JmjC domain-containing protein 6) (Jumonji domain-containing protein 6) (Lysyl-hydroxylase JMJD6) (Peptide-lysine 5-dioxygenase JMJD6) (Phosphatidylserine receptor) (Protein PTDSR)               | histone demethylase activity (H3-R2 specific) [GO:0033746]; histone demethylase activity (H4-R3 specific) [GO:0033749]; identical protein binding [GO:0042802]; iron ion binding [GO:0005506]; peptidyl-lysine 5-dioxygenase activity [GO:0070815]; receptor activity [GO:0004872]; RNA binding [GO:0003723]; single-stranded RNA binding [GO:0003727] |
| [25] | Q9NRW3 | DNA dC->dU-editing enzyme APOBEC-3C (A3C) (EC 3.5.4.-) (APOBEC1-like) (Phorbolin I)                                                                                                                                                                                                                                   | hydrolase activity, acting on carbon-nitrogen (but not peptide) bonds, in cyclic amidines [GO:0016814]; poly(A) RNA binding                                                                                                                                                                                                                            |

|                                          |        |                                                                                                                                                                                                                                                                                                                          | [GO:0044822]; zinc ion binding [GO:0008270]                                                                                                                                                  |
|------------------------------------------|--------|--------------------------------------------------------------------------------------------------------------------------------------------------------------------------------------------------------------------------------------------------------------------------------------------------------------------------|----------------------------------------------------------------------------------------------------------------------------------------------------------------------------------------------|
| [26]                                     | Q9NR96 | Toll-like receptor 9 (CD antigen CD289)                                                                                                                                                                                                                                                                                  | interleukin-1 receptor binding [GO:0005149]; siRNA binding [GO:0035197]; transmembrane signaling receptor activity [GO:0004888]                                                              |
| [27]                                     | O95071 | E3 ubiquitin-protein ligase UBR5 (EC 6.3.2.-) (E3 ubiquitin-protein ligase, HECT domain-containing 1) (Hyperplastic discs protein homolog) (hHYD) (Progesterin-induced protein)                                                                                                                                          | ligase activity [GO:0016874]; RNA binding [GO:0003723]; ubiquitin-protein transferase activity [GO:0004842]; ubiquitin-ubiquitin ligase activity [GO:0034450]; zinc ion binding [GO:0008270] |
| [28]                                     | O75153 | Clustered mitochondria protein homolog                                                                                                                                                                                                                                                                                   | mRNA binding [GO:0003729]                                                                                                                                                                    |
| [29]                                     | P0DJ4  | RNA-binding motif protein, Y chromosome, family 1 member C                                                                                                                                                                                                                                                               | nucleotide binding [GO:0000166]; RNA binding [GO:0003723]                                                                                                                                    |
| [30]                                     | Q9Y4P3 | Transducin beta-like protein 2 (WS beta-transducin repeats protein) (WS-betaTRP) (Williams-Beuren syndrome chromosomal region 13 protein)                                                                                                                                                                                | phosphoprotein binding [GO:0051219]; poly(A) RNA binding [GO:0044822]; protein kinase binding [GO:0019901]; translation initiation factor binding [GO:0031369]                               |
| [31]                                     | Q969X6 | Cirhin                                                                                                                                                                                                                                                                                                                   | poly(A) RNA binding [GO:0044822]                                                                                                                                                             |
| [32]                                     | Q96BP2 | Coiled-coil-helix-coiled-coil-helix domain-containing protein 1 (28S ribosomal protein S37, mitochondrial) (MRP-S37) (Nuclear protein C2360)                                                                                                                                                                             | poly(A) RNA binding [GO:0044822]                                                                                                                                                             |
| [33]                                     | P55081 | Microfibrillar-associated protein 1                                                                                                                                                                                                                                                                                      | poly(A) RNA binding [GO:0044822]                                                                                                                                                             |
| [34]                                     | Q9BRT6 | Protein LLP homolog (Protein LAPS18-like)                                                                                                                                                                                                                                                                                | poly(A) RNA binding [GO:0044822]                                                                                                                                                             |
| [35]                                     | Q9NNW5 | WD repeat-containing protein 6                                                                                                                                                                                                                                                                                           | poly(A) RNA binding [GO:0044822]                                                                                                                                                             |
| [36]                                     | P0CG48 | Polyubiquitin-C [Cleaved into: Ubiquitin]                                                                                                                                                                                                                                                                                | poly(A) RNA binding [GO:0044822]; protease binding [GO:0002020]                                                                                                                              |
| [37]                                     | Q68CQ4 | Digestive organ expansion factor homolog                                                                                                                                                                                                                                                                                 | poly(A) RNA binding [GO:0044822]; rRNA binding [GO:0019843]; U3 snoRNA binding [GO:0034511]                                                                                                  |
| [38]                                     | Q8IWA0 | WD repeat-containing protein 75                                                                                                                                                                                                                                                                                          | poly(A) RNA binding [GO:0044822]; transcription cofactor activity [GO:0003712]                                                                                                               |
| [39]                                     | O95777 | U6 snRNA-associated Sm-like protein LSm8                                                                                                                                                                                                                                                                                 | poly(A) RNA binding [GO:0044822]; U6 snRNA binding [GO:0017070]                                                                                                                              |
| [40]                                     | Q16576 | Histone-binding protein RBBP7 (Histone acetyltransferase type B subunit 2) (Nucleosome-remodeling factor subunit RBAP46) (Retinoblastoma-binding protein 7) (RBBP-7) (Retinoblastoma-binding protein p46)                                                                                                                | RNA binding [GO:0003723]                                                                                                                                                                     |
| [41]                                     | Q13487 | snRNA-activating protein complex subunit 2 (SNAPc subunit 2) (Proximal sequence element-binding transcription factor subunit delta) (PSE-binding factor subunit delta) (PTF subunit delta) (Small nuclear RNA-activating complex polypeptide 2) (snRNA-activating protein complex 45 kDa subunit) (SNAPc 45 kDa subunit) | transcription factor activity, sequence-specific DNA binding [GO:0003700]                                                                                                                    |
| [42]                                     | O75971 | snRNA-activating protein complex subunit 5 (SNAPc subunit 5) (Small nuclear RNA-activating complex polypeptide 5) (snRNA-activating protein complex 19 kDa subunit) (SNAPc 19 kDa subunit)                                                                                                                               | transcription factor activity, sequence-specific DNA binding [GO:0003700]                                                                                                                    |
| [43]                                     | Q9NSQ0 | Putative ribosomal RNA-processing protein 7 homolog B (Putative gastric cancer antigen Zg14-like protein)                                                                                                                                                                                                                |                                                                                                                                                                                              |
| <b>Proteins annotated as DNA-binding</b> |        |                                                                                                                                                                                                                                                                                                                          |                                                                                                                                                                                              |
| Serial number                            | Entry  | Protein name                                                                                                                                                                                                                                                                                                             | GO annotation (molecular function)                                                                                                                                                           |
| [1]                                      | P49643 | DNA primase large subunit (EC 2.7.7.-) (DNA primase 58 kDa subunit) (p58)                                                                                                                                                                                                                                                | 4 iron, 4 sulfur cluster binding [GO:0051539]; DNA binding [GO:0003677]; DNA primase activity [GO:0003896]; metal ion binding                                                                |

|     |        |                                                                                                                                                                                                                                                                                                                  |                                                                                                                                                                                                                                                                                                                                                                                                                                                                                                                                                                                                                                                                                                                                                                                                                                                                                                                                                                                                                                                                                                                                                                                                                          |
|-----|--------|------------------------------------------------------------------------------------------------------------------------------------------------------------------------------------------------------------------------------------------------------------------------------------------------------------------|--------------------------------------------------------------------------------------------------------------------------------------------------------------------------------------------------------------------------------------------------------------------------------------------------------------------------------------------------------------------------------------------------------------------------------------------------------------------------------------------------------------------------------------------------------------------------------------------------------------------------------------------------------------------------------------------------------------------------------------------------------------------------------------------------------------------------------------------------------------------------------------------------------------------------------------------------------------------------------------------------------------------------------------------------------------------------------------------------------------------------------------------------------------------------------------------------------------------------|
|     |        |                                                                                                                                                                                                                                                                                                                  | [GO:0046872]                                                                                                                                                                                                                                                                                                                                                                                                                                                                                                                                                                                                                                                                                                                                                                                                                                                                                                                                                                                                                                                                                                                                                                                                             |
| [2] | Q9H790 | Exonuclease V (Exo V) (hExo5) (EC 3.1.-.-) (Defects in morphology protein 1 homolog)                                                                                                                                                                                                                             | 4 iron, 4 sulfur cluster binding [GO:0051539]; DNA binding [GO:0003677]; metal ion binding [GO:0046872]; protein homodimerization activity [GO:0042803]; single-stranded DNA 3'-5' exodeoxyribonuclease activity [GO:0008310]; single-stranded DNA 5'-3' exodeoxyribonuclease activity [GO:0045145]                                                                                                                                                                                                                                                                                                                                                                                                                                                                                                                                                                                                                                                                                                                                                                                                                                                                                                                      |
| [3] | O75417 | DNA polymerase theta (EC 2.7.7.7) (DNA polymerase eta)                                                                                                                                                                                                                                                           | 5'-deoxyribose-5-phosphate lyase activity [GO:0051575]; ATP binding [GO:0005524]; chromatin binding [GO:0003682]; damaged DNA binding [GO:0003684]; DNA-directed DNA polymerase activity [GO:0003887]; single-stranded DNA-dependent ATPase activity [GO:0043142]                                                                                                                                                                                                                                                                                                                                                                                                                                                                                                                                                                                                                                                                                                                                                                                                                                                                                                                                                        |
| [4] | O95551 | Tyrosyl-DNA phosphodiesterase 2 (Tyr-DNA phosphodiesterase 2) (hTDP2) (EC 3.1.4.-) (5'-tyrosyl-DNA phosphodiesterase) (5'-Tyr-DNA phosphodiesterase) (ETS1-associated protein 2) (ETS1-associated protein II) (EAPII) (TRAF and TNF receptor-associated protein) (Tyrosyl-RNA phosphodiesterase) (VPg unlinkase) | 5'-tyrosyl-DNA phosphodiesterase activity [GO:0070260]; magnesium ion binding [GO:0000287]; manganese ion binding [GO:0030145]; nuclease activity [GO:0004518]; single-stranded DNA binding [GO:0003697]; transcription corepressor activity [GO:0003714]; tyrosyl-RNA phosphodiesterase activity [GO:0036317]                                                                                                                                                                                                                                                                                                                                                                                                                                                                                                                                                                                                                                                                                                                                                                                                                                                                                                           |
| [5] | Q09472 | Histone acetyltransferase p300 (p300 HAT) (EC 2.3.1.48) (E1A-associated protein p300)                                                                                                                                                                                                                            | acetyltransferase activity [GO:0016407]; activating transcription factor binding [GO:0033613]; androgen receptor binding [GO:0050681]; antigen binding [GO:0003823]; beta-catenin binding [GO:0008013]; chromatin binding [GO:0003682]; chromatin DNA binding [GO:0031490]; core promoter binding [GO:0001047]; damaged DNA binding [GO:0003684]; DNA binding [GO:0003677]; histone acetyltransferase activity [GO:0004402]; lysine N-acetyltransferase activity, acting on acetyl phosphate as donor [GO:0004468]; nuclear hormone receptor binding [GO:0035257]; pre-mRNA intronic binding [GO:0097157]; protein C-terminus binding [GO:0008022]; RNA polymerase II activating transcription factor binding [GO:0001102]; RNA polymerase II core promoter proximal region sequence-specific DNA binding [GO:0000978]; RNA polymerase II core promoter sequence-specific DNA binding [GO:0000979]; transcriptional activator activity, RNA polymerase II transcription regulatory region sequence-specific binding [GO:0001228]; transcription coactivator activity [GO:0003713]; transcription factor binding [GO:0008134]; transferase activity, transferring acyl groups [GO:0016746]; zinc ion binding [GO:0008270] |
| [6] | Q92793 | CREB-binding protein (EC 2.3.1.48)                                                                                                                                                                                                                                                                               | acetyltransferase activity [GO:0016407]; chromatin binding [GO:0003682]; core promoter proximal region sequence-specific DNA binding [GO:0000987]; damaged DNA binding [GO:0003684]; histone acetyltransferase activity [GO:0004402]; MRF binding [GO:0043426]; p53 binding [GO:0002039]; RNA polymerase II activating transcription factor binding [GO:0001102]; RNA polymerase II regulatory region sequence-specific DNA binding [GO:0000977]; RNA polymerase II transcription coactivator activity [GO:0001105]; RNA                                                                                                                                                                                                                                                                                                                                                                                                                                                                                                                                                                                                                                                                                                 |

|      |        |                                                                                                                                                                                                                                                     |                                                                                                                                                                                                                                                                                                                                                                                                                                                                                                                                                                                                                                                                   |
|------|--------|-----------------------------------------------------------------------------------------------------------------------------------------------------------------------------------------------------------------------------------------------------|-------------------------------------------------------------------------------------------------------------------------------------------------------------------------------------------------------------------------------------------------------------------------------------------------------------------------------------------------------------------------------------------------------------------------------------------------------------------------------------------------------------------------------------------------------------------------------------------------------------------------------------------------------------------|
|      |        |                                                                                                                                                                                                                                                     | polymerase II transcription factor binding [GO:0001085]; signal transducer activity [GO:0004871]; transcriptional activator activity, RNA polymerase II transcription regulatory region sequence-specific binding [GO:0001228]; transcriptional repressor activity, RNA polymerase II core promoter proximal region sequence-specific binding [GO:0001078]; transcriptional repressor activity, RNA polymerase II transcription factor binding [GO:0001191]; transcription coactivator activity [GO:0003713]; transcription factor activity, sequence-specific DNA binding [GO:0003700]; transcription factor binding [GO:0008134]; zinc ion binding [GO:0008270] |
| [7]  | P10323 | Acrosin (EC 3.4.21.10) [Cleaved into: Acrosin light chain; Acrosin heavy chain]                                                                                                                                                                     | amidase activity [GO:0004040]; copper ion binding [GO:0005507]; DNA binding [GO:0003677]; drug binding [GO:0008144]; fucose binding [GO:0042806]; mannose binding [GO:0005537]; serine-type endopeptidase activity [GO:0004252]; zinc ion binding [GO:0008270]                                                                                                                                                                                                                                                                                                                                                                                                    |
| [8]  | Q8TEA8 | D-tyrosyl-tRNA(Tyr) deacylase 1 (EC 3.1.-.-) (DNA-unwinding element-binding protein B) (DUE-B) (Histidyl-tRNA synthase-related)                                                                                                                     | aminoacyl-tRNA editing activity [GO:0002161]; DNA binding [GO:0003677]; D-tyrosyl-tRNA(Tyr) deacylase activity [GO:0051500]; metal ion binding [GO:0046872]                                                                                                                                                                                                                                                                                                                                                                                                                                                                                                       |
| [9]  | P50613 | Cyclin-dependent kinase 7 (EC 2.7.11.22) (EC 2.7.11.23) (39 kDa protein kinase) (p39 Mo15) (CDK-activating kinase 1) (Cell division protein kinase 7) (Serine/threonine-protein kinase 1) (TFIIH basal transcription factor complex kinase subunit) | androgen receptor binding [GO:0050681]; ATP binding [GO:0005524]; cyclin-dependent protein serine/threonine kinase activity [GO:0004693]; DNA-dependent ATPase activity [GO:0008094]; protein C-terminus binding [GO:0008022]; protein kinase activity [GO:0004672]; RNA polymerase II carboxy-terminal domain kinase activity [GO:0008353]; transcription coactivator activity [GO:0003713]                                                                                                                                                                                                                                                                      |
| [10] | Q9Y4C1 | Lysine-specific demethylase 3A (EC 1.14.11.-) (JmjC domain-containing histone demethylation protein 2A) (Jumonji domain-containing protein 1A)                                                                                                      | androgen receptor binding [GO:0050681]; core promoter binding [GO:0001047]; dioxygenase activity [GO:0051213]; iron ion binding [GO:0005506]; transcription factor activity, sequence-specific DNA binding [GO:0003700]; transcription regulatory region sequence-specific DNA binding [GO:0000976]                                                                                                                                                                                                                                                                                                                                                               |
| [11] | P78317 | E3 ubiquitin-protein ligase RNF4 (EC 6.3.2.-) (RING finger protein 4) (Small nuclear ring finger protein) (Protein SNURF)                                                                                                                           | androgen receptor binding [GO:0050681]; DNA binding [GO:0003677]; identical protein binding [GO:0042802]; ligase activity [GO:0016874]; nucleosome binding [GO:0031491]; SUMO polymer binding [GO:0032184]; transcription coactivator activity [GO:0003713]; transcription factor activity, sequence-specific DNA binding [GO:0003700]; ubiquitin-protein transferase activity [GO:0004842]; zinc ion binding [GO:0008270]                                                                                                                                                                                                                                        |
| [12] | Q13033 | Striatin-3 (Cell cycle autoantigen SG2NA) (S/G2 antigen)                                                                                                                                                                                            | armadillo repeat domain binding [GO:0070016]; calmodulin binding [GO:0005516]; protein complex binding [GO:0032403]; protein phosphatase 2A binding [GO:0051721]; transcription factor activity, sequence-specific DNA binding [GO:0003700]                                                                                                                                                                                                                                                                                                                                                                                                                       |
| [13] | Q8N3C0 | Activating signal cointegrator 1 complex subunit 3 (EC 3.6.4.12) (ASC-1 complex subunit p200) (ASC1p200) (Helicase, ATP binding 1) (Trip4 complex subunit p200)                                                                                     | ATP binding [GO:0005524]; ATP-dependent 3'-5' DNA helicase activity [GO:0043140]; poly(A) RNA binding [GO:0044822]                                                                                                                                                                                                                                                                                                                                                                                                                                                                                                                                                |
| [14] | O94762 | ATP-dependent DNA helicase Q5 (EC 3.6.4.12) (DNA helicase, RecQ-like type 5) (RecQ5) (RecQ                                                                                                                                                          | ATP binding [GO:0005524]; ATP-dependent helicase activity [GO:0008026]; DNA helicase                                                                                                                                                                                                                                                                                                                                                                                                                                                                                                                                                                              |

|      |        |                                                                                                                                                                                                                                     |                                                                                                                                                                                                                                                                                                                                                                                                                                                                                                                             |
|------|--------|-------------------------------------------------------------------------------------------------------------------------------------------------------------------------------------------------------------------------------------|-----------------------------------------------------------------------------------------------------------------------------------------------------------------------------------------------------------------------------------------------------------------------------------------------------------------------------------------------------------------------------------------------------------------------------------------------------------------------------------------------------------------------------|
|      |        | protein-like 5)                                                                                                                                                                                                                     | activity [GO:0003678]; nucleic acid binding [GO:0003676]; RNA polymerase II core binding [GO:0000993]                                                                                                                                                                                                                                                                                                                                                                                                                       |
| [15] | P43246 | DNA mismatch repair protein Msh2 (hMSH2) (MutS protein homolog 2)                                                                                                                                                                   | ATP binding [GO:0005524]; centromeric DNA binding [GO:0019237]; damaged DNA binding [GO:0003684]; DNA binding [GO:0003677]; DNA-dependent ATPase activity [GO:0008094]; double-strand/single-strand DNA junction binding [GO:0000406]; enzyme binding [GO:0019899]; guanine/thymine mispair binding [GO:0032137]; heteroduplex DNA loop binding [GO:0000404]; protein C-terminus binding [GO:0008022]; protein homodimerization activity [GO:0042803]; protein kinase binding [GO:0019901]; Y-form DNA binding [GO:0000403] |
| [16] | P20585 | DNA mismatch repair protein Msh3 (hMSH3) (Divergent upstream protein) (DUP) (Mismatch repair protein 1) (MRP1)                                                                                                                      | ATP binding [GO:0005524]; centromeric DNA binding [GO:0019237]; damaged DNA binding [GO:0003684]; DNA-dependent ATPase activity [GO:0008094]; double-strand/single-strand DNA junction binding [GO:0000406]; enzyme binding [GO:0019899]; heteroduplex DNA loop binding [GO:0000404]; Y-form DNA binding [GO:0000403]                                                                                                                                                                                                       |
| [17] | Q8IYD8 | Fanconi anemia group M protein (Protein FACM) (EC 3.6.4.13) (ATP-dependent RNA helicase FANCM) (Fanconi anemia-associated polypeptide of 250 kDa) (FAAP250) (Protein Hef ortholog)                                                  | ATP binding [GO:0005524]; chromatin binding [GO:0003682]; DNA binding [GO:0003677]; helicase activity [GO:0004386]; nuclease activity [GO:0004518]                                                                                                                                                                                                                                                                                                                                                                          |
| [18] | O15457 | MutS protein homolog 4 (hMSH4)                                                                                                                                                                                                      | ATP binding [GO:0005524]; DNA binding [GO:0003677]; DNA-dependent ATPase activity [GO:0008094]; mismatched DNA binding [GO:0030983]                                                                                                                                                                                                                                                                                                                                                                                         |
| [19] | P28482 | Mitogen-activated protein kinase 1 (MAP kinase 1) (MAPK 1) (EC 2.7.11.24) (ERT1) (Extracellular signal-regulated kinase 2) (ERK-2) (MAP kinase isoform p42) (p42-MAPK) (Mitogen-activated protein kinase 2) (MAP kinase 2) (MAPK 2) | ATP binding [GO:0005524]; DNA binding [GO:0003677]; MAP kinase activity [GO:0004707]; phosphatase binding [GO:0019902]; protein serine/threonine kinase activity [GO:0004674]; RNA polymerase II carboxy-terminal domain kinase activity [GO:0008353]                                                                                                                                                                                                                                                                       |
| [20] | Q9NTK5 | Obg-like ATPase 1 (DNA damage-regulated overexpressed in cancer 45) (DOC45) (GTP-binding protein 9)                                                                                                                                 | ATPase activity [GO:0016887]; ATP binding [GO:0005524]; GTP binding [GO:0005525]; metal ion binding [GO:0046872]; ribosomal large subunit binding [GO:0043023]; ribosome binding [GO:0043022]                                                                                                                                                                                                                                                                                                                               |
| [21] | Q9NSC2 | Sal-like protein 1 (Spalt-like transcription factor 1) (Zinc finger protein 794) (Zinc finger protein SALL1) (Zinc finger protein Spalt-1) (HSal1) (Sal-1)                                                                          | beta-catenin binding [GO:0008013]; chromatin binding [GO:0003682]; DNA binding [GO:0003677]; metal ion binding [GO:0046872]; RNA polymerase II core promoter proximal region sequence-specific DNA binding [GO:0000978]; transcriptional repressor activity, RNA polymerase II core promoter proximal region sequence-specific binding [GO:0001078]; transcription factor activity, sequence-specific DNA binding [GO:0003700]                                                                                              |
| [22] | O60907 | F-box-like/WD repeat-containing protein TBL1X (SMAP55) (Transducin beta-like protein 1X) (Transducin-beta-like protein 1, X-linked)                                                                                                 | beta-catenin binding [GO:0008013]; histone binding [GO:0042393]; protein C-terminus binding [GO:0008022]; protein domain specific binding [GO:0019904]; transcription corepressor activity [GO:0003714]; transcription factor binding [GO:0008134]; transcription regulatory region DNA binding [GO:0044212]                                                                                                                                                                                                                |
| [23] | Q9BZK7 | F-box-like/WD repeat-containing protein TBL1XR1 (Nuclear receptor corepressor/HDAC3                                                                                                                                                 | beta-catenin binding [GO:0008013]; histone binding [GO:0042393]; protein N-terminus                                                                                                                                                                                                                                                                                                                                                                                                                                         |

|      |        |                                                                                                                                                                                                                                              |                                                                                                                                                                                                                                                                                                                                                                                                                                                                                                                               |
|------|--------|----------------------------------------------------------------------------------------------------------------------------------------------------------------------------------------------------------------------------------------------|-------------------------------------------------------------------------------------------------------------------------------------------------------------------------------------------------------------------------------------------------------------------------------------------------------------------------------------------------------------------------------------------------------------------------------------------------------------------------------------------------------------------------------|
|      |        | complex subunit TBLR1) (TBL1-related protein 1) (Transducin beta-like 1X-related protein 1)                                                                                                                                                  | binding [GO:0047485]; transcription corepressor activity [GO:0003714]; transcription regulatory region DNA binding [GO:0044212]                                                                                                                                                                                                                                                                                                                                                                                               |
| [24] | Q2QGD7 | Zinc finger protein ZXDC (ZXD-like zinc finger protein)                                                                                                                                                                                      | C2H2 zinc finger domain binding [GO:0070742]; LRR domain binding [GO:0030275]; metal ion binding [GO:0046872]; nucleic acid binding [GO:0003676]; transcription factor activity, sequence-specific DNA binding [GO:0003700]                                                                                                                                                                                                                                                                                                   |
| [25] | O75575 | DNA-directed RNA polymerase III subunit RPC9 (RNA polymerase III subunit C9) (Calcitonin gene-related peptide-receptor component protein) (CGRP-RCP) (CGRP-receptor component protein) (CGRP-RCP) (HsC17)                                    | calcitonin gene-related peptide receptor activity [GO:0001635]; DNA-directed RNA polymerase activity [GO:0003899]; nucleotide binding [GO:0000166]                                                                                                                                                                                                                                                                                                                                                                            |
| [26] | P46531 | Neurogenic locus notch homolog protein 1 (Notch 1) (hN1) (Translocation-associated notch protein TAN-1) [Cleaved into: Notch 1 extracellular truncation (NEXT); Notch 1 intracellular domain (NICD)]                                         | calcium ion binding [GO:0005509]; chromatin DNA binding [GO:0031490]; core promoter binding [GO:0001047]; enzyme binding [GO:0019899]; enzyme inhibitor activity [GO:0004857]; receptor activity [GO:0004872]; sequence-specific DNA binding [GO:0043565]; transcriptional activator activity, RNA polymerase II transcription factor binding [GO:0001190]; transcription factor activity, sequence-specific DNA binding [GO:0003700]                                                                                         |
| [27] | Q66K89 | Transcription factor E4F1 (EC 6.3.2.-) (E4F transcription factor 1) (Putative E3 ubiquitin-protein ligase E4F1) (Transcription factor E4F) (p120E4F) (p50E4F)                                                                                | cAMP response element binding [GO:0035497]; DNA binding [GO:0003677]; ligase activity [GO:0016874]; metal ion binding [GO:0046872]; RNA polymerase II regulatory region sequence-specific DNA binding [GO:0000977]; transcriptional repressor activity, RNA polymerase II transcription regulatory region sequence-specific binding [GO:0001227]; transcription coactivator activity [GO:0003713]; transcription corepressor activity [GO:0003714]; transcription factor activity, sequence-specific DNA binding [GO:0003700] |
| [28] | P41182 | B-cell lymphoma 6 protein (BCL-6) (B-cell lymphoma 5 protein) (BCL-5) (Protein LAZ-3) (Zinc finger and BTB domain-containing protein 27) (Zinc finger protein 51)                                                                            | chromatin binding [GO:0003682]; chromatin DNA binding [GO:0031490]; intronic transcription regulatory region sequence-specific DNA binding [GO:0001161]; metal ion binding [GO:0046872]; RNA polymerase II regulatory region sequence-specific DNA binding [GO:0000977]; sequence-specific DNA binding [GO:0043565]; transcriptional repressor activity, RNA polymerase II transcription regulatory region sequence-specific binding [GO:0001227]; transcription factor activity, sequence-specific DNA binding [GO:0003700]  |
| [29] | P27694 | Replication protein A 70 kDa DNA-binding subunit (RP-A p70) (Replication factor A protein 1) (RF-A protein 1) (Single-stranded DNA-binding protein) [Cleaved into: Replication protein A 70 kDa DNA-binding subunit, N-terminally processed] | chromatin binding [GO:0003682]; damaged DNA binding [GO:0003684]; metal ion binding [GO:0046872]; single-stranded DNA binding [GO:0003697]                                                                                                                                                                                                                                                                                                                                                                                    |
| [30] | P05423 | DNA-directed RNA polymerase III subunit RPC4 (RNA polymerase III subunit C4) (DNA-directed RNA polymerase III subunit D) (Protein BN51) (RNA polymerase III 47 kDa subunit) (RPC53 homolog)                                                  | chromatin binding [GO:0003682]; DNA binding [GO:0003677]; DNA-directed RNA polymerase activity [GO:0003899]                                                                                                                                                                                                                                                                                                                                                                                                                   |
| [31] | O14802 | DNA-directed RNA polymerase III subunit RPC1 (RNA polymerase III subunit C1) (EC 2.7.7.6) (DNA-directed RNA polymerase III largest subunit) (DNA-directed RNA polymerase III                                                                 | chromatin binding [GO:0003682]; DNA binding [GO:0003677]; DNA-directed RNA polymerase activity [GO:0003899]; ribonucleoside binding [GO:0032549]; zinc ion binding [GO:0008270]                                                                                                                                                                                                                                                                                                                                               |

|      |        |                                                                                                                                                                                                                                                                               |                                                                                                                                                                                                                                                                                                                                                                                                                                                                         |
|------|--------|-------------------------------------------------------------------------------------------------------------------------------------------------------------------------------------------------------------------------------------------------------------------------------|-------------------------------------------------------------------------------------------------------------------------------------------------------------------------------------------------------------------------------------------------------------------------------------------------------------------------------------------------------------------------------------------------------------------------------------------------------------------------|
|      |        | subunit A) (RNA polymerase III 155 kDa subunit) (RPC155) (RNA polymerase III subunit C160)                                                                                                                                                                                    |                                                                                                                                                                                                                                                                                                                                                                                                                                                                         |
| [32] | Q9BRR0 | Zinc finger protein with KRAB and SCAN domains 3 (Zinc finger and SCAN domain-containing protein 13) (Zinc finger protein 306) (Zinc finger protein 309) (Zinc finger protein 47 homolog) (Zfp47) (Zfp-47)                                                                    | chromatin binding [GO:0003682]; DNA binding [GO:0003677]; metal ion binding [GO:0046872]; RNA polymerase II core promoter proximal region sequence-specific DNA binding [GO:0000978]; sequence-specific DNA binding [GO:0043565]; transcriptional repressor activity, RNA polymerase II core promoter proximal region sequence-specific binding [GO:0001078]; transcription factor activity, sequence-specific DNA binding [GO:0003700]                                 |
| [33] | Q9HBE1 | POZ-, AT hook-, and zinc finger-containing protein 1 (BTB/POZ domain zinc finger transcription factor) (Protein kinase A RI subunit alpha-associated protein) (Zinc finger and BTB domain-containing protein 19) (Zinc finger protein 278) (Zinc finger sarcoma gene protein) | chromatin binding [GO:0003682]; DNA binding [GO:0003677]; metal ion binding [GO:0046872]; RNA polymerase II core promoter proximal region sequence-specific DNA binding [GO:0000978]; transcriptional activator activity, RNA polymerase II core promoter proximal region sequence-specific binding [GO:0001077]                                                                                                                                                        |
| [34] | P29375 | Lysine-specific demethylase 5A (EC 1.14.11.-) (Histone demethylase JARID1A) (Jumonji/ARID domain-containing protein 1A) (Retinoblastoma-binding protein 2) (RBBP-2)                                                                                                           | chromatin binding [GO:0003682]; DNA binding [GO:0003677]; oxidoreductase activity, acting on paired donors, with incorporation or reduction of molecular oxygen, 2-oxoglutarate as one donor, and incorporation of one atom each of oxygen into both donors [GO:0016706]; transcription coactivator activity [GO:0003713]; transcription factor activity, sequence-specific DNA binding [GO:0003700]; zinc ion binding [GO:0008270]                                     |
| [35] | O75717 | WD repeat and HMG-box DNA-binding protein 1 (Acidic nucleoplasmic DNA-binding protein 1) (And-1)                                                                                                                                                                              | chromatin binding [GO:0003682]; DNA binding [GO:0003677]; RNA binding [GO:0003723]                                                                                                                                                                                                                                                                                                                                                                                      |
| [36] | Q9BQ87 | F-box-like/WD repeat-containing protein TBL1Y (Transducin beta-like protein 1Y) (Transducin-beta-like protein 1, Y-linked)                                                                                                                                                    | chromatin binding [GO:0003682]; DNA binding [GO:0003677]; transcription corepressor activity [GO:0003714]                                                                                                                                                                                                                                                                                                                                                               |
| [37] | O43623 | Zinc finger protein SNAI2 (Neural crest transcription factor Slug) (Protein snail homolog 2)                                                                                                                                                                                  | chromatin binding [GO:0003682]; metal ion binding [GO:0046872]; sequence-specific DNA binding [GO:0043565]; transcriptional repressor activity, RNA polymerase II core promoter proximal region sequence-specific binding [GO:0001078]; transcription factor activity, RNA polymerase II distal enhancer sequence-specific binding [GO:0003705]                                                                                                                         |
| [38] | Q9GZV1 | Ankyrin repeat domain-containing protein 2 (Skeletal muscle ankyrin repeat protein) (hArpp)                                                                                                                                                                                   | chromatin binding [GO:0003682]; protein kinase B binding [GO:0043422]; RNA polymerase II sequence-specific DNA binding transcription factor binding [GO:0061629]; structural constituent of muscle [GO:0008307]; titin binding [GO:0031432]                                                                                                                                                                                                                             |
| [39] | O95409 | Zinc finger protein ZIC 2 (Zinc finger protein of the cerebellum 2)                                                                                                                                                                                                           | chromatin DNA binding [GO:0031490]; DNA binding [GO:0003677]; metal ion binding [GO:0046872]; transcription factor activity, sequence-specific DNA binding [GO:0003700]                                                                                                                                                                                                                                                                                                 |
| [40] | Q14872 | Metal regulatory transcription factor 1 (MRE-binding transcription factor) (Transcription factor MTF-1)                                                                                                                                                                       | core promoter binding [GO:0001047]; DNA binding [GO:0003677]; metal ion binding [GO:0046872]; RNA polymerase II core promoter proximal region sequence-specific DNA binding [GO:0000978]; RNA polymerase II core promoter sequence-specific DNA binding [GO:0000979]; transcriptional activator activity, RNA polymerase II core promoter proximal region sequence-specific binding [GO:0001077]; transcription coactivator activity [GO:0003713]; transcription factor |



|      |        |                                                                                                                                                                                                                                                                                                                                             |                                                                                                                                                                                                                                                                                                                               |
|------|--------|---------------------------------------------------------------------------------------------------------------------------------------------------------------------------------------------------------------------------------------------------------------------------------------------------------------------------------------------|-------------------------------------------------------------------------------------------------------------------------------------------------------------------------------------------------------------------------------------------------------------------------------------------------------------------------------|
|      |        |                                                                                                                                                                                                                                                                                                                                             | activity, sequence-specific DNA binding [GO:0003700]                                                                                                                                                                                                                                                                          |
| [41] | Q00978 | Interferon regulatory factor 9 (IRF-9) (IFN-alpha-responsive transcription factor subunit) (ISGF3 p48 subunit) (Interferon-stimulated gene factor 3 gamma) (ISGF-3 gamma) (Transcriptional regulator ISGF3 subunit gamma)                                                                                                                   | core promoter binding [GO:0001047]; transcription factor activity, sequence-specific DNA binding [GO:0003700]                                                                                                                                                                                                                 |
| [42] | P31941 | DNA dC->dU-editing enzyme APOBEC-3A (A3A) (EC 3.5.4.-) (Phorbolin-1)                                                                                                                                                                                                                                                                        | cytidine deaminase activity [GO:0004126]; deoxycytidine deaminase activity [GO:0047844]; zinc ion binding [GO:0008270]                                                                                                                                                                                                        |
| [43] | Q9GZX7 | Single-stranded DNA cytosine deaminase (EC 3.5.4.38) (Activation-induced cytidine deaminase) (Cytidine aminohydrolase)                                                                                                                                                                                                                      | cytidine deaminase activity [GO:0004126]; ubiquitin protein ligase binding [GO:0031625]; zinc ion binding [GO:0008270]                                                                                                                                                                                                        |
| [44] | Q16531 | DNA damage-binding protein 1 (DDB p127 subunit) (DNA damage-binding protein a) (DDBa) (Damage-specific DNA-binding protein 1) (HBV X-associated protein 1) (XAP-1) (UV-damaged DNA-binding factor) (UV-damaged DNA-binding protein 1) (UV-DDB 1) (XPE-binding factor) (XPE-BF) (Xeroderma pigmentosum group E-complementing protein) (XPCe) | damaged DNA binding [GO:0003684]; DNA binding [GO:0003677]                                                                                                                                                                                                                                                                    |
| [45] | Q92466 | DNA damage-binding protein 2 (DDB p48 subunit) (DDBb) (Damage-specific DNA-binding protein 2) (UV-damaged DNA-binding protein 2) (UV-DDB 2)                                                                                                                                                                                                 | damaged DNA binding [GO:0003684]; DNA binding [GO:0003677]                                                                                                                                                                                                                                                                    |
| [46] | Q9NS91 | E3 ubiquitin-protein ligase RAD18 (EC 6.3.2.-) (Postreplication repair protein RAD18) (hHR18) (hRAD18) (RING finger protein 73)                                                                                                                                                                                                             | damaged DNA binding [GO:0003684]; ligase activity [GO:0016874]; polyubiquitin binding [GO:0031593]; single-stranded DNA-dependent ATPase activity [GO:0043142]; ubiquitin protein ligase activity [GO:0061630]; ubiquitin protein ligase binding [GO:0031625]; Y-form DNA binding [GO:0000403]; zinc ion binding [GO:0008270] |
| [47] | Q9NUX5 | Protection of telomeres protein 1 (hPot1) (POT1-like telomere end-binding protein)                                                                                                                                                                                                                                                          | DEAD/H-box RNA helicase binding [GO:0017151]; G-rich strand telomeric DNA binding [GO:0098505]; single-stranded telomeric DNA binding [GO:0043047]; telomerase inhibitor activity [GO:0010521]                                                                                                                                |
| [48] | Q9UH17 | DNA dC->dU-editing enzyme APOBEC-3B (A3B) (EC 3.5.4.-) (Phorbolin-1-related protein) (Phorbolin-2/3)                                                                                                                                                                                                                                        | deoxycytidine deaminase activity [GO:0047844]; poly(A) RNA binding [GO:0044822]; zinc ion binding [GO:0008270]                                                                                                                                                                                                                |
| [49] | Q9Y5Q8 | General transcription factor 3C polypeptide 5 (TF3C-epsilon) (Transcription factor IIIC 63 kDa subunit) (TFIIIC 63 kDa subunit) (TFIIIC63) (Transcription factor IIIC subunit epsilon)                                                                                                                                                      | DNA binding [GO:0003677]                                                                                                                                                                                                                                                                                                      |
| [50] | Q969F1 | General transcription factor 3C polypeptide 6 (Transcription factor IIIC 35 kDa subunit) (TFIIIC 35 kDa subunit) (TFIIIC35) (Transcription factor IIIC subunit 6)                                                                                                                                                                           | DNA binding [GO:0003677]                                                                                                                                                                                                                                                                                                      |
| [51] | Q9H9Q4 | Non-homologous end-joining factor 1 (Protein cernunnos) (XRCC4-like factor)                                                                                                                                                                                                                                                                 | DNA binding [GO:0003677]                                                                                                                                                                                                                                                                                                      |
| [52] | Q92966 | snRNA-activating protein complex subunit 3 (SNAPc subunit 3) (Proximal sequence element-binding transcription factor subunit beta) (PSE-binding factor subunit beta) (PTF subunit beta) (Small nuclear RNA-activating complex polypeptide 3) (snRNA-activating protein complex 50 kDa subunit) (SNAPc 50 kDa subunit)                       | DNA binding [GO:0003677]                                                                                                                                                                                                                                                                                                      |
| [53] | Q15573 | TATA box-binding protein-associated factor RNA polymerase I subunit A (RNA polymerase I-specific TBP-associated factor 48 kDa) (TAFI48) (TATA box-binding protein-associated factor 1A)                                                                                                                                                     | DNA binding [GO:0003677]                                                                                                                                                                                                                                                                                                      |

|      |        |                                                                                                                                                                                                                                                                           |                                                                                                                                                                                                                                                                                                                              |
|------|--------|---------------------------------------------------------------------------------------------------------------------------------------------------------------------------------------------------------------------------------------------------------------------------|------------------------------------------------------------------------------------------------------------------------------------------------------------------------------------------------------------------------------------------------------------------------------------------------------------------------------|
|      |        | (TBP-associated factor 1A) (Transcription factor SL1) (Transcription initiation factor SL1/TIF-IB subunit A)                                                                                                                                                              |                                                                                                                                                                                                                                                                                                                              |
| [54] | Q9H5J8 | TATA box-binding protein-associated factor RNA polymerase I subunit D (RNA polymerase I-specific TBP-associated factor 41 kDa) (TAFI41) (TATA box-binding protein-associated factor 1D) (TBP-associated factor 1D) (Transcription initiation factor SL1/TIF-IB subunit D) | DNA binding [GO:0003677]                                                                                                                                                                                                                                                                                                     |
| [55] | Q96AP0 | Adrenocortical dysplasia protein homolog (POT1 and TIN2-interacting protein)                                                                                                                                                                                              | DNA binding [GO:0003677]; DNA polymerase binding [GO:0070182]                                                                                                                                                                                                                                                                |
| [56] | P19387 | DNA-directed RNA polymerase II subunit RPB3 (RNA polymerase II subunit 3) (RNA polymerase II subunit B3) (DNA-directed RNA polymerase II 33 kDa polypeptide) (RPB33) (DNA-directed RNA polymerase II subunit C) (RPB31)                                                   | DNA binding [GO:0003677]; DNA-directed RNA polymerase activity [GO:0003899]                                                                                                                                                                                                                                                  |
| [57] | Q9BUI4 | DNA-directed RNA polymerase III subunit RPC3 (RNA polymerase III subunit C3) (DNA-directed RNA polymerase III subunit C) (RNA polymerase III 62 kDa subunit) (RPC62)                                                                                                      | DNA binding [GO:0003677]; DNA-directed RNA polymerase activity [GO:0003899]                                                                                                                                                                                                                                                  |
| [58] | Q9H1D9 | DNA-directed RNA polymerase III subunit RPC6 (RNA polymerase III subunit C6) (DNA-directed RNA polymerase III subunit F) (RNA polymerase III 39 kDa subunit) (RPC39)                                                                                                      | DNA binding [GO:0003677]; DNA-directed RNA polymerase activity [GO:0003899]                                                                                                                                                                                                                                                  |
| [59] | Q9Y535 | DNA-directed RNA polymerase III subunit RPC8 (RNA polymerase III subunit C8) (DNA-directed RNA polymerase III subunit H) (RNA polymerase III subunit 22.9 kDa subunit) (RPC22.9)                                                                                          | DNA binding [GO:0003677]; DNA-directed RNA polymerase activity [GO:0003899]                                                                                                                                                                                                                                                  |
| [60] | O15160 | DNA-directed RNA polymerases I and III subunit RPAC1 (DNA-directed RNA polymerase I subunit C) (RNA polymerases I and III subunit AC1) (AC40) (DNA-directed RNA polymerases I and III 40 kDa polypeptide) (RPA40) (RPA39) (RPC40)                                         | DNA binding [GO:0003677]; DNA-directed RNA polymerase activity [GO:0003899]                                                                                                                                                                                                                                                  |
| [61] | Q9Y2S0 | DNA-directed RNA polymerases I and III subunit RPAC2 (RNA polymerases I and III subunit AC2) (AC19) (DNA-directed RNA polymerase I subunit D) (RNA polymerase I 16 kDa subunit) (RPA16) (RPC16) (hRPA19)                                                                  | DNA binding [GO:0003677]; DNA-directed RNA polymerase activity [GO:0003899]                                                                                                                                                                                                                                                  |
| [62] | Q9BWH6 | RNA polymerase II-associated protein 1                                                                                                                                                                                                                                    | DNA binding [GO:0003677]; DNA-directed RNA polymerase activity [GO:0003899]                                                                                                                                                                                                                                                  |
| [63] | Q9H9Y6 | DNA-directed RNA polymerase I subunit RPA2 (RNA polymerase I subunit 2) (EC 2.7.7.6) (DNA-directed RNA polymerase I 135 kDa polypeptide) (RPA135)                                                                                                                         | DNA binding [GO:0003677]; DNA-directed RNA polymerase activity [GO:0003899]; metal ion binding [GO:0046872]; ribonucleoside binding [GO:0032549]                                                                                                                                                                             |
| [64] | Q9NW08 | DNA-directed RNA polymerase III subunit RPC2 (RNA polymerase III subunit C2) (EC 2.7.7.6) (C128) (DNA-directed RNA polymerase III 127.6 kDa polypeptide) (DNA-directed RNA polymerase III subunit B)                                                                      | DNA binding [GO:0003677]; DNA-directed RNA polymerase activity [GO:0003899]; metal ion binding [GO:0046872]; ribonucleoside binding [GO:0032549]                                                                                                                                                                             |
| [65] | O95602 | DNA-directed RNA polymerase I subunit RPA1 (RNA polymerase I subunit A1) (EC 2.7.7.6) (A190) (DNA-directed RNA polymerase I largest subunit) (DNA-directed RNA polymerase I subunit A) (RNA polymerase I 194 kDa subunit) (RPA194)                                        | DNA binding [GO:0003677]; DNA-directed RNA polymerase activity [GO:0003899]; zinc ion binding [GO:0008270]                                                                                                                                                                                                                   |
| [66] | Q05516 | Zinc finger and BTB domain-containing protein 16 (Promyelocytic leukemia zinc finger protein) (Zinc finger protein 145) (Zinc finger protein PLZF)                                                                                                                        | DNA binding [GO:0003677]; double-stranded DNA binding [GO:0003690]; identical protein binding [GO:0042802]; metal ion binding [GO:0046872]; protein homodimerization activity [GO:0042803]; RNA polymerase II distal enhancer sequence-specific DNA binding [GO:0000980]; transcriptional repressor activity, RNA polymerase |

|      |        |                                                                                                                                                                                                                          |                                                                                                                                                                                                                                                                                                                                                                                                                                                                                                                                                                                                            |
|------|--------|--------------------------------------------------------------------------------------------------------------------------------------------------------------------------------------------------------------------------|------------------------------------------------------------------------------------------------------------------------------------------------------------------------------------------------------------------------------------------------------------------------------------------------------------------------------------------------------------------------------------------------------------------------------------------------------------------------------------------------------------------------------------------------------------------------------------------------------------|
|      |        |                                                                                                                                                                                                                          | II distal enhancer sequence-specific binding [GO:0001206]                                                                                                                                                                                                                                                                                                                                                                                                                                                                                                                                                  |
| [67] | Q9H171 | Z-DNA-binding protein 1 (Tumor stroma and activated macrophage protein DLM-1)                                                                                                                                            | DNA binding [GO:0003677]; double-stranded RNA adenosine deaminase activity [GO:0003726]; left-handed Z-DNA binding [GO:0003692]; RNA binding [GO:0003723]                                                                                                                                                                                                                                                                                                                                                                                                                                                  |
| [68] | P25490 | Transcriptional repressor protein YY1 (Delta transcription factor) (INO80 complex subunit S) (NF-E1) (Yin and yang 1) (YY-1)                                                                                             | DNA binding [GO:0003677]; enhancer sequence-specific DNA binding [GO:0001158]; four-way junction DNA binding [GO:0000400]; RNA binding [GO:0003723]; SMAD binding [GO:0046332]; transcriptional repressor activity, RNA polymerase II core promoter proximal region sequence-specific binding [GO:0001078]; transcription coactivator activity [GO:0003713]; transcription corepressor activity [GO:0003714]; transcription factor activity, sequence-specific DNA binding [GO:0003700]; transcription regulatory region DNA binding [GO:0044212]; zinc ion binding [GO:0008270]                           |
| [69] | Q9UKN8 | General transcription factor 3C polypeptide 4 (EC 2.3.1.48) (TF3C-delta) (Transcription factor IIIC 90 kDa subunit) (TFIIIC 90 kDa subunit) (TFIIIC90) (Transcription factor IIIC subunit delta)                         | DNA binding [GO:0003677]; enzyme activator activity [GO:0008047]; histone acetyltransferase activity [GO:0004402]                                                                                                                                                                                                                                                                                                                                                                                                                                                                                          |
| [70] | Q8N895 | Zinc finger protein 366                                                                                                                                                                                                  | DNA binding [GO:0003677]; estrogen receptor binding [GO:0030331]; metal ion binding [GO:0046872]; transcription corepressor activity [GO:0003714]                                                                                                                                                                                                                                                                                                                                                                                                                                                          |
| [71] | Q15072 | Zinc finger protein OZF (Only zinc finger protein) (Zinc finger protein 146)                                                                                                                                             | DNA binding [GO:0003677]; heparin binding [GO:0008201]; transcription factor activity, sequence-specific DNA binding [GO:0003700]; zinc ion binding [GO:0008270]                                                                                                                                                                                                                                                                                                                                                                                                                                           |
| [72] | Q9UGL1 | Lysine-specific demethylase 5B (EC 1.14.11.-) (Cancer/testis antigen 31) (CT31) (Histone demethylase JARID1B) (Jumonji/ARID domain-containing protein 1B) (PLU-1) (Retinoblastoma-binding protein 2 homolog 1) (RBP2-H1) | DNA binding [GO:0003677]; histone demethylase activity (H3-dimethyl-K4 specific) [GO:0034648]; histone demethylase activity (H3-K4 specific) [GO:0032453]; histone demethylase activity (H3-trimethyl-K4 specific) [GO:0034647]; oxidoreductase activity, acting on paired donors, with incorporation or reduction of molecular oxygen, 2-oxoglutarate as one donor, and incorporation of one atom each of oxygen into both donors [GO:0016706]; transcription corepressor activity [GO:0003714]; transcription factor activity, sequence-specific DNA binding [GO:0003700]; zinc ion binding [GO:0008270] |
| [73] | P41229 | Lysine-specific demethylase 5C (EC 1.14.11.-) (Histone demethylase JARID1C) (Jumonji/ARID domain-containing protein 1C) (Protein SmcX) (Protein Xe169)                                                                   | DNA binding [GO:0003677]; histone demethylase activity (H3-K4 specific) [GO:0032453]; oxidoreductase activity, acting on paired donors, with incorporation or reduction of molecular oxygen, 2-oxoglutarate as one donor, and incorporation of one atom each of oxygen into both donors [GO:0016706]; zinc ion binding [GO:0008270]                                                                                                                                                                                                                                                                        |
| [74] | Q9BY66 | Lysine-specific demethylase 5D (EC 1.14.11.-) (Histocompatibility Y antigen) (H-Y) (Histone demethylase JARID1D) (Jumonji/ARID domain-containing protein 1D) (Protein SmcY)                                              | DNA binding [GO:0003677]; histone demethylase activity (H3-K4 specific) [GO:0032453]; oxidoreductase activity, acting on paired donors, with incorporation or reduction of molecular oxygen, 2-oxoglutarate as one donor, and incorporation of one atom each of oxygen into both donors [GO:0016706]; zinc ion binding [GO:0008270]                                                                                                                                                                                                                                                                        |
| [75] | Q14653 | Interferon regulatory factor 3 (IRF-3)                                                                                                                                                                                   | DNA binding [GO:0003677]; identical protein                                                                                                                                                                                                                                                                                                                                                                                                                                                                                                                                                                |

|      |        |                                                                                                                                                                                   |                                                                                                                                                                                                                                           |
|------|--------|-----------------------------------------------------------------------------------------------------------------------------------------------------------------------------------|-------------------------------------------------------------------------------------------------------------------------------------------------------------------------------------------------------------------------------------------|
|      |        |                                                                                                                                                                                   | binding [GO:0042802]; protein homodimerization activity [GO:0042803]; regulatory region DNA binding [GO:0000975]; transcription cofactor activity [GO:0003712]; transcription factor activity, sequence-specific DNA binding [GO:0003700] |
| [76] | P17036 | Zinc finger protein 3 (Zinc finger protein HF.12) (Zinc finger protein HZF3.1) (Zinc finger protein KOX25)                                                                        | DNA binding [GO:0003677]; identical protein binding [GO:0042802]; zinc ion binding [GO:0008270]                                                                                                                                           |
| [77] | A6NDX5 | Putative zinc finger protein 840 (Zinc finger protein 840 pseudogene)                                                                                                             | DNA binding [GO:0003677]; metal ion binding [GO:0046872]                                                                                                                                                                                  |
| [78] | Q9Y467 | Sal-like protein 2 (Zinc finger protein 795) (Zinc finger protein SALL2) (Zinc finger protein Spalt-2) (Sal-2) (hSal2)                                                            | DNA binding [GO:0003677]; metal ion binding [GO:0046872]                                                                                                                                                                                  |
| [79] | Q9BXA9 | Sal-like protein 3 (Zinc finger protein 796) (Zinc finger protein SALL3) (hSALL3)                                                                                                 | DNA binding [GO:0003677]; metal ion binding [GO:0046872]                                                                                                                                                                                  |
| [80] | P31629 | Transcription factor HIVP2 (Human immunodeficiency virus type I enhancer-binding protein 2) (HIV-EP2) (MHC-binding protein 2) (MBP-2)                                             | DNA binding [GO:0003677]; metal ion binding [GO:0046872]                                                                                                                                                                                  |
| [81] | P21506 | Zinc finger protein 10 (Zinc finger protein KOX1)                                                                                                                                 | DNA binding [GO:0003677]; metal ion binding [GO:0046872]                                                                                                                                                                                  |
| [82] | P17021 | Zinc finger protein 17 (Zinc finger protein HPF3) (Zinc finger protein KOX10)                                                                                                     | DNA binding [GO:0003677]; metal ion binding [GO:0046872]                                                                                                                                                                                  |
| [83] | Q13360 | Zinc finger protein 177                                                                                                                                                           | DNA binding [GO:0003677]; metal ion binding [GO:0046872]                                                                                                                                                                                  |
| [84] | Q2M3W8 | Zinc finger protein 181 (HHZ181)                                                                                                                                                  | DNA binding [GO:0003677]; metal ion binding [GO:0046872]                                                                                                                                                                                  |
| [85] | Q9UL36 | Zinc finger protein 236                                                                                                                                                           | DNA binding [GO:0003677]; metal ion binding [GO:0046872]                                                                                                                                                                                  |
| [86] | O75437 | Zinc finger protein 254 (Bone marrow zinc finger 5) (BMZF-5) (Hematopoietic cell-derived zinc finger protein 1) (HD-ZNF1) (Zinc finger protein 539) (Zinc finger protein 91-like) | DNA binding [GO:0003677]; metal ion binding [GO:0046872]                                                                                                                                                                                  |
| [87] | Q9NSD4 | Zinc finger protein 275                                                                                                                                                           | DNA binding [GO:0003677]; metal ion binding [GO:0046872]                                                                                                                                                                                  |
| [88] | P17041 | Zinc finger protein 32 (C2H2-546) (Zinc finger protein KOX30)                                                                                                                     | DNA binding [GO:0003677]; metal ion binding [GO:0046872]                                                                                                                                                                                  |
| [89] | Q96JL9 | Zinc finger protein 333                                                                                                                                                           | DNA binding [GO:0003677]; metal ion binding [GO:0046872]                                                                                                                                                                                  |
| [90] | Q8TD17 | Zinc finger protein 398 (Zinc finger DNA-binding protein p52/p71)                                                                                                                 | DNA binding [GO:0003677]; metal ion binding [GO:0046872]                                                                                                                                                                                  |
| [91] | Q86VK4 | Zinc finger protein 410 (Another partner for ARF 1) (Zinc finger protein APA-1)                                                                                                   | DNA binding [GO:0003677]; metal ion binding [GO:0046872]                                                                                                                                                                                  |
| [92] | Q2M1K9 | Zinc finger protein 423 (Olf1/EBF-associated zinc finger protein) (hOAZ) (Smad- and Olf-interacting zinc finger protein)                                                          | DNA binding [GO:0003677]; metal ion binding [GO:0046872]                                                                                                                                                                                  |
| [93] | Q6IV72 | Zinc finger protein 425                                                                                                                                                           | DNA binding [GO:0003677]; metal ion binding [GO:0046872]                                                                                                                                                                                  |
| [94] | Q9BUY5 | Zinc finger protein 426                                                                                                                                                           | DNA binding [GO:0003677]; metal ion binding [GO:0046872]                                                                                                                                                                                  |
| [95] | Q8NDP4 | Zinc finger protein 439                                                                                                                                                           | DNA binding [GO:0003677]; metal ion binding [GO:0046872]                                                                                                                                                                                  |
| [96] | P15621 | Zinc finger protein 44 (Gonadotropin-inducible ovary transcription repressor 2) (GIOT-2) (Zinc finger protein 55) (Zinc finger protein 58) (Zinc finger protein KOX7)             | DNA binding [GO:0003677]; metal ion binding [GO:0046872]                                                                                                                                                                                  |
| [97] | Q9H7R0 | Zinc finger protein 442                                                                                                                                                           | DNA binding [GO:0003677]; metal ion binding [GO:0046872]                                                                                                                                                                                  |
| [98] | Q5VIY5 | Zinc finger protein 468                                                                                                                                                           | DNA binding [GO:0003677]; metal ion binding [GO:0046872]                                                                                                                                                                                  |

|       |        |                                                                                             |                                                                                                                                         |
|-------|--------|---------------------------------------------------------------------------------------------|-----------------------------------------------------------------------------------------------------------------------------------------|
| [99]  | Q8NCK3 | Zinc finger protein 485                                                                     | DNA binding [GO:0003677]; metal ion binding [GO:0046872]                                                                                |
| [100] | Q6ZMY9 | Zinc finger protein 517                                                                     | DNA binding [GO:0003677]; metal ion binding [GO:0046872]                                                                                |
| [101] | Q8NB42 | Zinc finger protein 527                                                                     | DNA binding [GO:0003677]; metal ion binding [GO:0046872]                                                                                |
| [102] | Q6P280 | Zinc finger protein 529                                                                     | DNA binding [GO:0003677]; metal ion binding [GO:0046872]                                                                                |
| [103] | Q8IVP9 | Zinc finger protein 547                                                                     | DNA binding [GO:0003677]; metal ion binding [GO:0046872]                                                                                |
| [104] | Q96NG5 | Zinc finger protein 558                                                                     | DNA binding [GO:0003677]; metal ion binding [GO:0046872]                                                                                |
| [105] | Q969W8 | Zinc finger protein 566                                                                     | DNA binding [GO:0003677]; metal ion binding [GO:0046872]                                                                                |
| [106] | Q96NG8 | Zinc finger protein 582                                                                     | DNA binding [GO:0003677]; metal ion binding [GO:0046872]                                                                                |
| [107] | Q96JF6 | Zinc finger protein 594 (Zinc finger protein HZF18)                                         | DNA binding [GO:0003677]; metal ion binding [GO:0046872]                                                                                |
| [108] | Q8TC21 | Zinc finger protein 596                                                                     | DNA binding [GO:0003677]; metal ion binding [GO:0046872]                                                                                |
| [109] | Q8N883 | Zinc finger protein 614                                                                     | DNA binding [GO:0003677]; metal ion binding [GO:0046872]                                                                                |
| [110] | Q8N2I2 | Zinc finger protein 619                                                                     | DNA binding [GO:0003677]; metal ion binding [GO:0046872]                                                                                |
| [111] | O15015 | Zinc finger protein 646                                                                     | DNA binding [GO:0003677]; metal ion binding [GO:0046872]                                                                                |
| [112] | Q9BS34 | Zinc finger protein 670                                                                     | DNA binding [GO:0003677]; metal ion binding [GO:0046872]                                                                                |
| [113] | Q2M3X9 | Zinc finger protein 674                                                                     | DNA binding [GO:0003677]; metal ion binding [GO:0046872]                                                                                |
| [114] | Q5TEC3 | Zinc finger protein 697                                                                     | DNA binding [GO:0003677]; metal ion binding [GO:0046872]                                                                                |
| [115] | Q9NV72 | Zinc finger protein 701                                                                     | DNA binding [GO:0003677]; metal ion binding [GO:0046872]                                                                                |
| [116] | Q8N972 | Zinc finger protein 709                                                                     | DNA binding [GO:0003677]; metal ion binding [GO:0046872]                                                                                |
| [117] | O43361 | Zinc finger protein 749                                                                     | DNA binding [GO:0003677]; metal ion binding [GO:0046872]                                                                                |
| [118] | Q86XN6 | Zinc finger protein 761                                                                     | DNA binding [GO:0003677]; metal ion binding [GO:0046872]                                                                                |
| [119] | Q7L3S4 | Zinc finger protein 771 (Mesenchymal stem cell protein DSC43)                               | DNA binding [GO:0003677]; metal ion binding [GO:0046872]                                                                                |
| [120] | Q147U1 | Zinc finger protein 846                                                                     | DNA binding [GO:0003677]; metal ion binding [GO:0046872]                                                                                |
| [121] | A8MQ14 | Zinc finger protein 850                                                                     | DNA binding [GO:0003677]; metal ion binding [GO:0046872]                                                                                |
| [122] | A6NHJ4 | Zinc finger protein 860                                                                     | DNA binding [GO:0003677]; metal ion binding [GO:0046872]                                                                                |
| [123] | P0CG24 | Zinc finger protein 883                                                                     | DNA binding [GO:0003677]; metal ion binding [GO:0046872]                                                                                |
| [124] | P0CJ79 | Zinc finger protein 888                                                                     | DNA binding [GO:0003677]; metal ion binding [GO:0046872]                                                                                |
| [125] | A6NM28 | Zinc finger protein 92 homolog (Zfp-92)                                                     | DNA binding [GO:0003677]; metal ion binding [GO:0046872]                                                                                |
| [126] | A8MXY4 | Zinc finger protein 99                                                                      | DNA binding [GO:0003677]; metal ion binding [GO:0046872]                                                                                |
| [127] | Q9NQV6 | PR domain zinc finger protein 10 (EC 2.1.1.-) (PR domain-containing protein 10) (Tristanin) | DNA binding [GO:0003677]; metal ion binding [GO:0046872]; methyltransferase activity [GO:0008168]                                       |
| [128] | Q03923 | Zinc finger protein 85 (Zinc finger protein HPF4) (Zinc finger protein HTF1)                | DNA binding [GO:0003677]; metal ion binding [GO:0046872]; RNA polymerase II core promoter proximal region sequence-specific DNA binding |

|       |        |                                                                                                                                        |                                                                                                                                                                                 |
|-------|--------|----------------------------------------------------------------------------------------------------------------------------------------|---------------------------------------------------------------------------------------------------------------------------------------------------------------------------------|
|       |        |                                                                                                                                        | [GO:0000978]; transcription corepressor activity [GO:0003714]; transcription factor activity, sequence-specific DNA binding [GO:0003700]                                        |
| [129] | Q9NX65 | Zinc finger and SCAN domain-containing protein 32 (Human cervical cancer suppressor gene 5 protein) (HCCS-5) (Zinc finger protein 434) | DNA binding [GO:0003677]; metal ion binding [GO:0046872]; RNA polymerase II transcription factor activity, sequence-specific DNA binding [GO:0000981]                           |
| [130] | A6NJL1 | Zinc finger and SCAN domain-containing protein 5B                                                                                      | DNA binding [GO:0003677]; metal ion binding [GO:0046872]; RNA polymerase II transcription factor activity, sequence-specific DNA binding [GO:0000981]                           |
| [131] | P13682 | Zinc finger protein 35 (Zinc finger protein HF.10)                                                                                     | DNA binding [GO:0003677]; metal ion binding [GO:0046872]; sequence-specific DNA binding [GO:0043565]; transcription factor activity, sequence-specific DNA binding [GO:0003700] |
| [132] | Q6ZS27 | Zinc finger protein 662                                                                                                                | DNA binding [GO:0003677]; metal ion binding [GO:0046872]; transcription cofactor activity [GO:0003712]                                                                          |
| [133] | Q8TAW3 | Zinc finger protein 671                                                                                                                | DNA binding [GO:0003677]; metal ion binding [GO:0046872]; transcription cofactor activity [GO:0003712]                                                                          |
| [134] | P52737 | Zinc finger protein 136                                                                                                                | DNA binding [GO:0003677]; metal ion binding [GO:0046872]; transcription corepressor activity [GO:0003714]                                                                       |
| [135] | P0CG31 | Putative zinc finger protein 286B                                                                                                      | DNA binding [GO:0003677]; metal ion binding [GO:0046872]; transcription factor activity, sequence-specific DNA binding [GO:0003700]                                             |
| [136] | Q86W11 | Zinc finger and SCAN domain-containing protein 30 (ZNF-WYM) (Zinc finger protein 397 opposite strand) (Zinc finger protein 397OS)      | DNA binding [GO:0003677]; metal ion binding [GO:0046872]; transcription factor activity, sequence-specific DNA binding [GO:0003700]                                             |
| [137] | Q6P2D0 | Zinc finger protein 1 homolog (Zfp-1) (Zinc finger protein 475)                                                                        | DNA binding [GO:0003677]; metal ion binding [GO:0046872]; transcription factor activity, sequence-specific DNA binding [GO:0003700]                                             |
| [138] | P58317 | Zinc finger protein 121 (Zinc finger protein 20)                                                                                       | DNA binding [GO:0003677]; metal ion binding [GO:0046872]; transcription factor activity, sequence-specific DNA binding [GO:0003700]                                             |
| [139] | Q9HCL3 | Zinc finger protein 14 homolog (Zfp-14) (Zinc finger protein 531)                                                                      | DNA binding [GO:0003677]; metal ion binding [GO:0046872]; transcription factor activity, sequence-specific DNA binding [GO:0003700]                                             |
| [140] | P52738 | Zinc finger protein 140                                                                                                                | DNA binding [GO:0003677]; metal ion binding [GO:0046872]; transcription factor activity, sequence-specific DNA binding [GO:0003700]                                             |
| [141] | Q12901 | Zinc finger protein 155                                                                                                                | DNA binding [GO:0003677]; metal ion binding [GO:0046872]; transcription factor activity, sequence-specific DNA binding [GO:0003700]                                             |
| [142] | P49910 | Zinc finger protein 165 (Cancer/testis antigen 53) (CT53) (LD65) (Zinc finger and SCAN domain-containing protein 7)                    | DNA binding [GO:0003677]; metal ion binding [GO:0046872]; transcription factor activity, sequence-specific DNA binding [GO:0003700]                                             |
| [143] | P17025 | Zinc finger protein 182 (Zinc finger protein 21) (Zinc finger protein KOX14)                                                           | DNA binding [GO:0003677]; metal ion binding [GO:0046872]; transcription factor activity, sequence-specific DNA binding [GO:0003700]                                             |
| [144] | Q6ZN57 | Zinc finger protein 2 homolog (Zfp-2) (Zinc finger protein 751)                                                                        | DNA binding [GO:0003677]; metal ion binding [GO:0046872]; transcription factor activity, sequence-specific DNA binding [GO:0003700]                                             |
| [145] | P15622 | Zinc finger protein 250 (Zinc finger protein 647)                                                                                      | DNA binding [GO:0003677]; metal ion binding [GO:0046872]; transcription factor activity, sequence-specific DNA binding [GO:0003700]                                             |
| [146] | Q14587 | Zinc finger protein 268 (Zinc finger protein HZF3)                                                                                     | DNA binding [GO:0003677]; metal ion binding [GO:0046872]; transcription factor activity, sequence-specific DNA binding [GO:0003700]                                             |
| [147] | P17035 | Zinc finger protein 28 (Zinc finger protein KOX24)                                                                                     | DNA binding [GO:0003677]; metal ion binding [GO:0046872]; transcription factor activity,                                                                                        |

|       |        |                                                                                                                                                 |                                                                                                                                     |
|-------|--------|-------------------------------------------------------------------------------------------------------------------------------------------------|-------------------------------------------------------------------------------------------------------------------------------------|
|       |        |                                                                                                                                                 | sequence-specific DNA binding [GO:0003700]                                                                                          |
| [148] | Q9HBT8 | Zinc finger protein 286A                                                                                                                        | DNA binding [GO:0003677]; metal ion binding [GO:0046872]; transcription factor activity, sequence-specific DNA binding [GO:0003700] |
| [149] | P17039 | Zinc finger protein 30 (Zinc finger protein KOX28)                                                                                              | DNA binding [GO:0003677]; metal ion binding [GO:0046872]; transcription factor activity, sequence-specific DNA binding [GO:0003700] |
| [150] | Q9Y2G7 | Zinc finger protein 30 homolog (Zfp-30) (Zinc finger protein 745)                                                                               | DNA binding [GO:0003677]; metal ion binding [GO:0046872]; transcription factor activity, sequence-specific DNA binding [GO:0003700] |
| [151] | Q5JNZ3 | Zinc finger protein 311 (Zinc finger protein zfp-31)                                                                                            | DNA binding [GO:0003677]; metal ion binding [GO:0046872]; transcription factor activity, sequence-specific DNA binding [GO:0003700] |
| [152] | Q06730 | Zinc finger protein 33A (Zinc finger and ZAK-associated protein with KRAB domain) (ZZaPK) (Zinc finger protein 11A) (Zinc finger protein KOX31) | DNA binding [GO:0003677]; metal ion binding [GO:0046872]; transcription factor activity, sequence-specific DNA binding [GO:0003700] |
| [153] | O60765 | Zinc finger protein 354A (Transcription factor 17) (TCF-17) (Zinc finger protein eZNF)                                                          | DNA binding [GO:0003677]; metal ion binding [GO:0046872]; transcription factor activity, sequence-specific DNA binding [GO:0003700] |
| [154] | Q86Y25 | Zinc finger protein 354C (Kidney, ischemia, and developmentally-regulated protein 3) (hKID3)                                                    | DNA binding [GO:0003677]; metal ion binding [GO:0046872]; transcription factor activity, sequence-specific DNA binding [GO:0003700] |
| [155] | Q8NA42 | Zinc finger protein 383                                                                                                                         | DNA binding [GO:0003677]; metal ion binding [GO:0046872]; transcription factor activity, sequence-specific DNA binding [GO:0003700] |
| [156] | Q9UJN7 | Zinc finger protein 391                                                                                                                         | DNA binding [GO:0003677]; metal ion binding [GO:0046872]; transcription factor activity, sequence-specific DNA binding [GO:0003700] |
| [157] | Q8NF99 | Zinc finger protein 397 (Zinc finger and SCAN domain-containing protein 15) (Zinc finger protein 47)                                            | DNA binding [GO:0003677]; metal ion binding [GO:0046872]; transcription factor activity, sequence-specific DNA binding [GO:0003700] |
| [158] | Q09FC8 | Zinc finger protein 415                                                                                                                         | DNA binding [GO:0003677]; metal ion binding [GO:0046872]; transcription factor activity, sequence-specific DNA binding [GO:0003700] |
| [159] | Q6ZR52 | Zinc finger protein 493                                                                                                                         | DNA binding [GO:0003677]; metal ion binding [GO:0046872]; transcription factor activity, sequence-specific DNA binding [GO:0003700] |
| [160] | Q96CX3 | Zinc finger protein 501 (Zinc finger protein 52)                                                                                                | DNA binding [GO:0003677]; metal ion binding [GO:0046872]; transcription factor activity, sequence-specific DNA binding [GO:0003700] |
| [161] | Q8N782 | Zinc finger protein 525                                                                                                                         | DNA binding [GO:0003677]; metal ion binding [GO:0046872]; transcription factor activity, sequence-specific DNA binding [GO:0003700] |
| [162] | Q7Z398 | Zinc finger protein 550                                                                                                                         | DNA binding [GO:0003677]; metal ion binding [GO:0046872]; transcription factor activity, sequence-specific DNA binding [GO:0003700] |
| [163] | Q8N9K5 | Zinc finger protein 565                                                                                                                         | DNA binding [GO:0003677]; metal ion binding [GO:0046872]; transcription factor activity, sequence-specific DNA binding [GO:0003700] |
| [164] | Q6ZNG1 | Zinc finger protein 600                                                                                                                         | DNA binding [GO:0003677]; metal ion binding [GO:0046872]; transcription factor activity, sequence-specific DNA binding [GO:0003700] |
| [165] | Q8N823 | Zinc finger protein 611                                                                                                                         | DNA binding [GO:0003677]; metal ion binding [GO:0046872]; transcription factor activity, sequence-specific DNA binding [GO:0003700] |
| [166] | O75123 | Zinc finger protein 623                                                                                                                         | DNA binding [GO:0003677]; metal ion binding [GO:0046872]; transcription factor activity, sequence-specific DNA binding [GO:0003700] |
| [167] | Q9UEG4 | Zinc finger protein 629 (Zinc finger protein 65)                                                                                                | DNA binding [GO:0003677]; metal ion binding [GO:0046872]; transcription factor activity, sequence-specific DNA binding [GO:0003700] |

|       |        |                                                                                                                                                                                                                                             |                                                                                                                                                                                                                             |
|-------|--------|---------------------------------------------------------------------------------------------------------------------------------------------------------------------------------------------------------------------------------------------|-----------------------------------------------------------------------------------------------------------------------------------------------------------------------------------------------------------------------------|
| [168] | Q9H7R5 | Zinc finger protein 665 (Zinc finger protein 160-like)                                                                                                                                                                                      | DNA binding [GO:0003677]; metal ion binding [GO:0046872]; transcription factor activity, sequence-specific DNA binding [GO:0003700]                                                                                         |
| [169] | O75290 | Zinc finger protein 780A                                                                                                                                                                                                                    | DNA binding [GO:0003677]; metal ion binding [GO:0046872]; transcription factor activity, sequence-specific DNA binding [GO:0003700]                                                                                         |
| [170] | Q8N141 | Zinc finger protein 82 homolog (Zfp-82) (Zinc finger protein 545)                                                                                                                                                                           | DNA binding [GO:0003677]; metal ion binding [GO:0046872]; transcription factor activity, sequence-specific DNA binding [GO:0003700]                                                                                         |
| [171] | Q9Y2P0 | Zinc finger protein 835                                                                                                                                                                                                                     | DNA binding [GO:0003677]; metal ion binding [GO:0046872]; transcription factor activity, sequence-specific DNA binding [GO:0003700]                                                                                         |
| [172] | Q6ZNA1 | Zinc finger protein 836                                                                                                                                                                                                                     | DNA binding [GO:0003677]; metal ion binding [GO:0046872]; transcription factor activity, sequence-specific DNA binding [GO:0003700]                                                                                         |
| [173] | B4DU55 | Zinc finger protein 879                                                                                                                                                                                                                     | DNA binding [GO:0003677]; metal ion binding [GO:0046872]; transcription factor activity, sequence-specific DNA binding [GO:0003700]                                                                                         |
| [174] | Q969J2 | Zinc finger protein with KRAB and SCAN domains 4 (P373c6.1) (Zinc finger protein 307) (Zinc finger protein 427)                                                                                                                             | DNA binding [GO:0003677]; metal ion binding [GO:0046872]; transcription factor activity, sequence-specific DNA binding [GO:0003700]                                                                                         |
| [175] | Q9P0L1 | Zinc finger protein with KRAB and SCAN domains 7 (Zinc finger protein 167) (Zinc finger protein 448) (Zinc finger protein 64)                                                                                                               | DNA binding [GO:0003677]; metal ion binding [GO:0046872]; transcription factor activity, sequence-specific DNA binding [GO:0003700]                                                                                         |
| [176] | Q15776 | Zinc finger protein with KRAB and SCAN domains 8 (LD5-1) (Zinc finger protein 192)                                                                                                                                                          | DNA binding [GO:0003677]; metal ion binding [GO:0046872]; transcription factor activity, sequence-specific DNA binding [GO:0003700]                                                                                         |
| [177] | Q8TF47 | Zinc finger protein 90 homolog (Zfp-90) (Zinc finger protein 756)                                                                                                                                                                           | DNA binding [GO:0003677]; metal ion binding [GO:0046872]; transcriptional repressor activity, RNA polymerase II core promoter proximal region sequence-specific binding [GO:0001078]                                        |
| [178] | P20749 | B-cell lymphoma 3 protein (BCL-3) (Proto-oncogene BCL3)                                                                                                                                                                                     | DNA binding [GO:0003677]; protein binding, bridging [GO:0030674]; transcription factor activity, sequence-specific DNA binding [GO:0003700]; transcription factor binding [GO:0008134]                                      |
| [179] | O14896 | Interferon regulatory factor 6 (IRF-6)                                                                                                                                                                                                      | DNA binding [GO:0003677]; regulatory region DNA binding [GO:0000975]; transcription factor activity, sequence-specific DNA binding [GO:0003700]                                                                             |
| [180] | O60381 | HMG box-containing protein 1 (HMG box transcription factor 1) (High mobility group box transcription factor 1)                                                                                                                              | DNA binding [GO:0003677]; RNA binding [GO:0003723]                                                                                                                                                                          |
| [181] | Q8TD23 | Zinc finger protein 675 (TRAF6-binding zinc finger protein) (TRAF6-inhibitory zinc finger protein)                                                                                                                                          | DNA binding [GO:0003677]; RNA polymerase II core promoter proximal region sequence-specific DNA binding [GO:0000978]; ubiquitin protein ligase binding [GO:0031625]; zinc ion binding [GO:0008270]                          |
| [182] | Q92985 | Interferon regulatory factor 7 (IRF-7)                                                                                                                                                                                                      | DNA binding [GO:0003677]; RNA polymerase II core promoter sequence-specific DNA binding [GO:0000979]; transcription factor activity, RNA polymerase II core promoter proximal region sequence-specific binding [GO:0000982] |
| [183] | P62380 | TATA box-binding protein-like protein 1 (TBP-like protein 1) (21 kDa TBP-like protein) (Second TBP of unique DNA protein) (STUD) (TATA box-binding protein-related factor 2) (TBP-related factor 2) (TBP-like factor) (TBP-related protein) | DNA binding [GO:0003677]; transcription coactivator activity [GO:0003713]                                                                                                                                                   |
| [184] | P82094 | TATA element modulatory factor (TMF) (Androgen receptor coactivator 160 kDa protein) (Androgen receptor-associated protein of 160 kDa)                                                                                                      | DNA binding [GO:0003677]; transcription cofactor activity [GO:0003712]                                                                                                                                                      |
| [185] | Q6SJ96 | TATA box-binding protein-like protein 2 (TBP-                                                                                                                                                                                               | DNA binding [GO:0003677]; transcription factor                                                                                                                                                                              |



|       |        |                                                                                                                                                              |                                                                                                                                                                                                                                                                                                                                                               |
|-------|--------|--------------------------------------------------------------------------------------------------------------------------------------------------------------|---------------------------------------------------------------------------------------------------------------------------------------------------------------------------------------------------------------------------------------------------------------------------------------------------------------------------------------------------------------|
|       |        | like protein 2) (TATA box-binding protein-related factor 3) (TBP-related factor 3)                                                                           | activity, sequence-specific DNA binding [GO:0003700]                                                                                                                                                                                                                                                                                                          |
| [186] | P29374 | AT-rich interactive domain-containing protein 4A (ARID domain-containing protein 4A) (Retinoblastoma-binding protein 1) (RBBP-1)                             | DNA binding [GO:0003677]; transcription factor activity, sequence-specific DNA binding [GO:0003700]; transcription regulatory region DNA binding [GO:0044212]                                                                                                                                                                                                 |
| [187] | Q9NPC7 | Myoneurin (Zinc finger and BTB domain-containing protein 31)                                                                                                 | DNA binding [GO:0003677]; transcription factor activity, sequence-specific DNA binding [GO:0003700]; zinc ion binding [GO:0008270]                                                                                                                                                                                                                            |
| [188] | Q05481 | Zinc finger protein 91 (Zinc finger protein HPF7) (Zinc finger protein HTF10)                                                                                | DNA binding [GO:0003677]; transcription factor activity, sequence-specific DNA binding [GO:0003700]; zinc ion binding [GO:0008270]                                                                                                                                                                                                                            |
| [189] | O60318 | Germinal-center associated nuclear protein (GANP) (80 kDa MCM3-associated protein) (MCM3 acetylating protein) (MCM3AP) (EC 2.3.1.-) (MCM3 acetyltransferase) | DNA binding [GO:0003677]; transferase activity, transferring acyl groups [GO:0016746]                                                                                                                                                                                                                                                                         |
| [190] | Q9Y3C5 | RING finger protein 11                                                                                                                                       | DNA binding [GO:0003677]; ubiquitin-protein transferase activity [GO:0004842]; zinc ion binding [GO:0008270]                                                                                                                                                                                                                                                  |
| [191] | Q5H9K5 | Zinc finger matrin-type protein 1                                                                                                                            | DNA binding [GO:0003677]; zinc ion binding [GO:0008270]                                                                                                                                                                                                                                                                                                       |
| [192] | Q9H898 | Zinc finger matrin-type protein 4                                                                                                                            | DNA binding [GO:0003677]; zinc ion binding [GO:0008270]                                                                                                                                                                                                                                                                                                       |
| [193] | Q9NVU0 | DNA-directed RNA polymerase III subunit RPC5 (RNA polymerase III subunit C5) (DNA-directed RNA polymerase III 80 kDa polypeptide)                            | DNA-directed RNA polymerase activity [GO:0003899]                                                                                                                                                                                                                                                                                                             |
| [194] | Q9H944 | Mediator of RNA polymerase II transcription subunit 20 (Mediator complex subunit 20) (TRF-proximal protein homolog) (hTRFP)                                  | DNA-directed RNA polymerase activity [GO:0003899]; RNA polymerase II transcription cofactor activity [GO:0001104]; transcription coactivator activity [GO:0003713]; ubiquitin protein ligase activity [GO:0061630]                                                                                                                                            |
| [195] | P20226 | TATA-box-binding protein (TATA sequence-binding protein) (TATA-binding factor) (TATA-box factor) (Transcription initiation factor TFIID TBP subunit)         | enzyme binding [GO:0019899]; repressing transcription factor binding [GO:0070491]; RNA polymerase II core promoter proximal region sequence-specific DNA binding [GO:0000978]; transcription factor activity, sequence-specific DNA binding [GO:0003700]; transcription factor binding [GO:0008134]; transcription regulatory region DNA binding [GO:0044212] |
| [196] | Q6W2J9 | BCL-6 corepressor (BCoR)                                                                                                                                     | heat shock protein binding [GO:0031072]; histone deacetylase binding [GO:0042826]; transcription corepressor activity [GO:0003714]; transcription factor binding [GO:0008134]; transcription regulatory region DNA binding [GO:0044212]                                                                                                                       |
| [197] | Q14526 | Hypermethylated in cancer 1 protein (Hic-1) (Zinc finger and BTB domain-containing protein 29)                                                               | histone deacetylase binding [GO:0042826]; metal ion binding [GO:0046872]; sequence-specific DNA binding [GO:0043565]; transcription factor activity, sequence-specific DNA binding [GO:0003700]                                                                                                                                                               |
| [198] | Q9NRW3 | DNA dC->dU-editing enzyme APOBEC-3C (A3C) (EC 3.5.4.-) (APOBEC1-like) (Phorbolin I)                                                                          | hydrolase activity, acting on carbon-nitrogen (but not peptide) bonds, in cyclic amidines [GO:0016814]; poly(A) RNA binding [GO:0044822]; zinc ion binding [GO:0008270]                                                                                                                                                                                       |
| [199] | Q96AK3 | DNA dC->dU-editing enzyme APOBEC-3D (A3D) (EC 3.5.4.-)                                                                                                       | hydrolase activity, acting on carbon-nitrogen (but not peptide) bonds, in cyclic amidines [GO:0016814]; zinc ion binding [GO:0008270]                                                                                                                                                                                                                         |
| [200] | O95863 | Zinc finger protein SNAI1 (Protein snail homolog 1) (Protein sna)                                                                                            | kinase binding [GO:0019900]; metal ion binding [GO:0046872]; RNA polymerase II regulatory region sequence-specific DNA binding [GO:0000977]; transcriptional repressor activity, RNA polymerase II core promoter proximal region sequence-specific binding [GO:0001078]                                                                                       |

|       |        |                                                                                                                                                                |                                                                                                                                                                                                                                                                                                                                                        |
|-------|--------|----------------------------------------------------------------------------------------------------------------------------------------------------------------|--------------------------------------------------------------------------------------------------------------------------------------------------------------------------------------------------------------------------------------------------------------------------------------------------------------------------------------------------------|
| [201] | Q8NC42 | E3 ubiquitin-protein ligase RNF149 (EC 6.3.2.-) (DNA polymerase-transactivated protein 2) (RING finger protein 149)                                            | ligase activity [GO:0016874]; ubiquitin protein ligase activity [GO:0061630]; zinc ion binding [GO:0008270]                                                                                                                                                                                                                                            |
| [202] | P57071 | PR domain zinc finger protein 15 (EC 2.1.1.-) (PR domain-containing protein 15) (Zinc finger protein 298)                                                      | metal ion binding [GO:0046872]; methyltransferase activity [GO:0008168]; RNA polymerase II regulatory region sequence-specific DNA binding [GO:0000977]; transcription factor activity, sequence-specific DNA binding [GO:0003700]                                                                                                                     |
| [203] | B7Z6K7 | Putative uncharacterized zinc finger protein 814 (Putative zinc finger protein LOC730051)                                                                      | metal ion binding [GO:0046872]; nucleic acid binding [GO:0003676]; transcription factor activity, sequence-specific DNA binding [GO:0003700]                                                                                                                                                                                                           |
| [204] | P29083 | General transcription factor IIE subunit 1 (General transcription factor IIE 56 kDa subunit) (Transcription initiation factor IIE subunit alpha) (TFIIE-alpha) | metal ion binding [GO:0046872]; RNA polymerase II core binding [GO:0000993]; sequence-specific DNA binding [GO:0043565]; TFIID-class transcription factor binding [GO:0001097]; transcription factor activity, core RNA polymerase II binding [GO:0000991]; transcription factor activity, RNA polymerase II transcription factor binding [GO:0001076] |
| [205] | Q6ZN08 | Putative zinc finger protein 66 (Zinc finger protein 66 pseudogene)                                                                                            | metal ion binding [GO:0046872]; RNA polymerase II core promoter proximal region sequence-specific DNA binding [GO:0000978]                                                                                                                                                                                                                             |
| [206] | Q6ZMV8 | Putative zinc finger protein 730                                                                                                                               | metal ion binding [GO:0046872]; RNA polymerase II core promoter proximal region sequence-specific DNA binding [GO:0000978]                                                                                                                                                                                                                             |
| [207] | O43296 | Zinc finger protein 264                                                                                                                                        | metal ion binding [GO:0046872]; RNA polymerase II core promoter proximal region sequence-specific DNA binding [GO:0000978]                                                                                                                                                                                                                             |
| [208] | Q9H8G1 | Zinc finger protein 430                                                                                                                                        | metal ion binding [GO:0046872]; RNA polymerase II core promoter proximal region sequence-specific DNA binding [GO:0000978]                                                                                                                                                                                                                             |
| [209] | Q14592 | Zinc finger protein 460 (Zinc finger protein 272) (Zinc finger protein HZF8)                                                                                   | metal ion binding [GO:0046872]; RNA polymerase II core promoter proximal region sequence-specific DNA binding [GO:0000978]                                                                                                                                                                                                                             |
| [210] | Q96JC4 | Zinc finger protein 479 (Zinc finger protein Kr19) (HKr19)                                                                                                     | metal ion binding [GO:0046872]; RNA polymerase II core promoter proximal region sequence-specific DNA binding [GO:0000978]                                                                                                                                                                                                                             |
| [211] | Q96H40 | Zinc finger protein 486 (KRAB domain only protein 2)                                                                                                           | metal ion binding [GO:0046872]; RNA polymerase II core promoter proximal region sequence-specific DNA binding [GO:0000978]                                                                                                                                                                                                                             |
| [212] | Q9P255 | Zinc finger protein 492 (Zinc finger protein 115)                                                                                                              | metal ion binding [GO:0046872]; RNA polymerase II core promoter proximal region sequence-specific DNA binding [GO:0000978]                                                                                                                                                                                                                             |
| [213] | Q5JVG8 | Zinc finger protein 506                                                                                                                                        | metal ion binding [GO:0046872]; RNA polymerase II core promoter proximal region sequence-specific DNA binding [GO:0000978]                                                                                                                                                                                                                             |
| [214] | Q08ER8 | Zinc finger protein 543                                                                                                                                        | metal ion binding [GO:0046872]; RNA polymerase II core promoter proximal region sequence-specific DNA binding [GO:0000978]                                                                                                                                                                                                                             |
| [215] | Q68DY1 | Zinc finger protein 626                                                                                                                                        | metal ion binding [GO:0046872]; RNA polymerase II core promoter proximal region sequence-specific DNA binding [GO:0000978]                                                                                                                                                                                                                             |
| [216] | Q8N3J9 | Zinc finger protein 664 (Zinc finger protein 176) (Zinc finger protein from organ of Corti)                                                                    | metal ion binding [GO:0046872]; RNA polymerase II core promoter proximal region sequence-specific DNA binding [GO:0000978]                                                                                                                                                                                                                             |
| [217] | Q8N7Q3 | Zinc finger protein 676                                                                                                                                        | metal ion binding [GO:0046872]; RNA polymerase II core promoter proximal region sequence-specific DNA binding [GO:0000978]                                                                                                                                                                                                                             |
| [218] | Q8NEM1 | Zinc finger protein 680                                                                                                                                        | metal ion binding [GO:0046872]; RNA polymerase II core promoter proximal region                                                                                                                                                                                                                                                                        |

|       |        |                                                                                                                                                                             |                                                                                                                                                                                                                                                                                                                                                                                                                                                                                                |
|-------|--------|-----------------------------------------------------------------------------------------------------------------------------------------------------------------------------|------------------------------------------------------------------------------------------------------------------------------------------------------------------------------------------------------------------------------------------------------------------------------------------------------------------------------------------------------------------------------------------------------------------------------------------------------------------------------------------------|
|       |        |                                                                                                                                                                             | sequence-specific DNA binding [GO:0000978]                                                                                                                                                                                                                                                                                                                                                                                                                                                     |
| [219] | O95780 | Zinc finger protein 682                                                                                                                                                     | metal ion binding [GO:0046872]; RNA polymerase II core promoter proximal region sequence-specific DNA binding [GO:0000978]                                                                                                                                                                                                                                                                                                                                                                     |
| [220] | P17019 | Zinc finger protein 708 (Zinc finger protein 15) (Zinc finger protein 15-like 1) (Zinc finger protein KOX8)                                                                 | metal ion binding [GO:0046872]; RNA polymerase II core promoter proximal region sequence-specific DNA binding [GO:0000978]                                                                                                                                                                                                                                                                                                                                                                     |
| [221] | Q96N38 | Zinc finger protein 714                                                                                                                                                     | metal ion binding [GO:0046872]; RNA polymerase II core promoter proximal region sequence-specific DNA binding [GO:0000978]                                                                                                                                                                                                                                                                                                                                                                     |
| [222] | O75373 | Zinc finger protein 737 (Zinc finger protein 102)                                                                                                                           | metal ion binding [GO:0046872]; RNA polymerase II core promoter proximal region sequence-specific DNA binding [GO:0000978]                                                                                                                                                                                                                                                                                                                                                                     |
| [223] | Q5CZA5 | Zinc finger protein 805                                                                                                                                                     | metal ion binding [GO:0046872]; RNA polymerase II core promoter proximal region sequence-specific DNA binding [GO:0000978]                                                                                                                                                                                                                                                                                                                                                                     |
| [224] | Q9H116 | GDNF-inducible zinc finger protein 1 (Zinc finger and BTB domain-containing protein 23) (Zinc finger protein 336)                                                           | metal ion binding [GO:0046872]; RNA polymerase II core promoter proximal region sequence-specific DNA binding [GO:0000978]; RNA polymerase II distal enhancer sequence-specific DNA binding [GO:0000980]; sequence-specific DNA binding [GO:0043565]; transcriptional repressor activity, RNA polymerase II core promoter proximal region sequence-specific binding [GO:0001078]; transcriptional repressor activity, RNA polymerase II distal enhancer sequence-specific binding [GO:0001206] |
| [225] | Q9UK33 | Zinc finger protein 580 (LDL-induced EC protein)                                                                                                                            | metal ion binding [GO:0046872]; RNA polymerase II regulatory region sequence-specific DNA binding [GO:0000977]                                                                                                                                                                                                                                                                                                                                                                                 |
| [226] | O43829 | Zinc finger and BTB domain-containing protein 14 (Zinc finger protein 161 homolog) (Zfp-161) (Zinc finger protein 478) (Zinc finger protein 5 homolog) (ZF5) (Zfp-5) (hZF5) | metal ion binding [GO:0046872]; RNA polymerase II regulatory region sequence-specific DNA binding [GO:0000977]; sequence-specific DNA binding [GO:0043565]; transcription factor activity, sequence-specific DNA binding [GO:0003700]; transcription regulatory region DNA binding [GO:0044212]                                                                                                                                                                                                |
| [227] | P17040 | Zinc finger and SCAN domain-containing protein 20 (Zinc finger protein 31) (Zinc finger protein 360) (Zinc finger protein KOX29)                                            | metal ion binding [GO:0046872]; RNA polymerase II regulatory region sequence-specific DNA binding [GO:0000977]; transcription factor activity, sequence-specific DNA binding [GO:0003700]                                                                                                                                                                                                                                                                                                      |
| [228] | Q9HCX3 | Zinc finger protein 304                                                                                                                                                     | metal ion binding [GO:0046872]; RNA polymerase II regulatory region sequence-specific DNA binding [GO:0000977]; transcription factor activity, sequence-specific DNA binding [GO:0003700]                                                                                                                                                                                                                                                                                                      |
| [229] | Q96HQ0 | Zinc finger protein 419                                                                                                                                                     | metal ion binding [GO:0046872]; RNA polymerase II regulatory region sequence-specific DNA binding [GO:0000977]; transcription factor activity, sequence-specific DNA binding [GO:0003700]                                                                                                                                                                                                                                                                                                      |
| [230] | Q96NI8 | Zinc finger protein 570                                                                                                                                                     | metal ion binding [GO:0046872]; RNA polymerase II regulatory region sequence-specific DNA binding [GO:0000977]; transcription factor activity, sequence-specific DNA binding [GO:0003700]                                                                                                                                                                                                                                                                                                      |
| [231] | Q96ND8 | Zinc finger protein 583 (Zinc finger protein L3-5)                                                                                                                          | metal ion binding [GO:0046872]; RNA polymerase II regulatory region sequence-specific DNA binding [GO:0000977]; transcription factor activity, sequence-specific DNA binding [GO:0003700]                                                                                                                                                                                                                                                                                                      |

|       |        |                                                                                                                                             |                                                                                                                                                                                                                                                                                                                                                                                                                                                    |
|-------|--------|---------------------------------------------------------------------------------------------------------------------------------------------|----------------------------------------------------------------------------------------------------------------------------------------------------------------------------------------------------------------------------------------------------------------------------------------------------------------------------------------------------------------------------------------------------------------------------------------------------|
| [232] | Q6AZW8 | Zinc finger protein 660                                                                                                                     | metal ion binding [GO:0046872]; RNA polymerase II regulatory region sequence-specific DNA binding [GO:0000977]; transcription factor activity, sequence-specific DNA binding [GO:0003700]                                                                                                                                                                                                                                                          |
| [233] | Q5VV52 | Zinc finger protein 691                                                                                                                     | metal ion binding [GO:0046872]; RNA polymerase II regulatory region sequence-specific DNA binding [GO:0000977]; transcription factor activity, sequence-specific DNA binding [GO:0003700]                                                                                                                                                                                                                                                          |
| [234] | Q68DY9 | Zinc finger protein 772                                                                                                                     | metal ion binding [GO:0046872]; RNA polymerase II regulatory region sequence-specific DNA binding [GO:0000977]; transcription factor activity, sequence-specific DNA binding [GO:0003700]                                                                                                                                                                                                                                                          |
| [235] | Q3KQV3 | Zinc finger protein 792                                                                                                                     | metal ion binding [GO:0046872]; RNA polymerase II regulatory region sequence-specific DNA binding [GO:0000977]; transcription factor activity, sequence-specific DNA binding [GO:0003700]                                                                                                                                                                                                                                                          |
| [236] | P08048 | Zinc finger Y-chromosomal protein                                                                                                           | metal ion binding [GO:0046872]; RNA polymerase II regulatory region sequence-specific DNA binding [GO:0000977]; transcription factor activity, sequence-specific DNA binding [GO:0003700]                                                                                                                                                                                                                                                          |
| [237] | O15391 | Transcription factor YY2 (Yin and yang 2) (YY-2) (Zinc finger protein 631)                                                                  | metal ion binding [GO:0046872]; sequence-specific DNA binding [GO:0043565]                                                                                                                                                                                                                                                                                                                                                                         |
| [238] | Q13216 | DNA excision repair protein ERCC-8 (Cockayne syndrome WD repeat protein CSA)                                                                | protein complex binding [GO:0032403]                                                                                                                                                                                                                                                                                                                                                                                                               |
| [239] | Q15542 | Transcription initiation factor TFIID subunit 5 (Transcription initiation factor TFIID 100 kDa subunit) (TAF(II)100) (TAFII-100) (TAFII100) | protein dimerization activity [GO:0046983]; transcription factor activity, sequence-specific DNA binding [GO:0003700]; transcription regulatory region DNA binding [GO:0044212]                                                                                                                                                                                                                                                                    |
| [240] | Q15306 | Interferon regulatory factor 4 (IRF-4) (Lymphocyte-specific interferon regulatory factor) (LSIRF) (Multiple myeloma oncogene 1) (NF-EM5)    | protein-lysine N-methyltransferase activity [GO:0016279]; RNA polymerase II core promoter proximal region sequence-specific DNA binding [GO:0000978]; sequence-specific DNA binding [GO:0043565]; transcriptional activator activity, RNA polymerase II core promoter proximal region sequence-specific binding [GO:0001077]; transcription factor activity, sequence-specific DNA binding [GO:0003700]; transcription factor binding [GO:0008134] |
| [241] | Q02556 | Interferon regulatory factor 8 (IRF-8) (Interferon consensus sequence-binding protein) (H-ICSBP) (ICSBP)                                    | regulatory region DNA binding [GO:0000975]; transcription factor activity, RNA polymerase II distal enhancer sequence-specific binding [GO:0003705]                                                                                                                                                                                                                                                                                                |
| [242] | Q13568 | Interferon regulatory factor 5 (IRF-5)                                                                                                      | regulatory region DNA binding [GO:0000975]; transcription factor activity, sequence-specific DNA binding [GO:0003700]                                                                                                                                                                                                                                                                                                                              |
| [243] | Q03938 | Zinc finger protein 90 (Zinc finger protein HTF9)                                                                                           | RNA polymerase II core promoter proximal region sequence-specific DNA binding [GO:0000978]; transcription factor activity, sequence-specific DNA binding [GO:0003700]; zinc ion binding [GO:0008270]                                                                                                                                                                                                                                               |
| [244] | P58546 | Myotrophin (Protein V-1)                                                                                                                    | sequence-specific DNA binding [GO:0043565]                                                                                                                                                                                                                                                                                                                                                                                                         |
| [245] | O75529 | TAF5-like RNA polymerase II p300/CBP-associated factor-associated factor 65 kDa subunit 5L (PCAF-associated factor 65 beta) (PAF65-beta)    | transcription coactivator activity [GO:0003713]; transcription factor activity, sequence-specific DNA binding [GO:0003700]                                                                                                                                                                                                                                                                                                                         |
| [246] | P54198 | Protein HIRA (TUP1-like enhancer of split protein 1)                                                                                        | transcription corepressor activity [GO:0003714]; transcription factor activity, sequence-specific DNA binding [GO:0003700]                                                                                                                                                                                                                                                                                                                         |

|       |        |                                                                                                                                                                                                                                                                                                                          |                                                                           |
|-------|--------|--------------------------------------------------------------------------------------------------------------------------------------------------------------------------------------------------------------------------------------------------------------------------------------------------------------------------|---------------------------------------------------------------------------|
| [247] | Q13487 | snRNA-activating protein complex subunit 2 (SNAPc subunit 2) (Proximal sequence element-binding transcription factor subunit delta) (PSE-binding factor subunit delta) (PTF subunit delta) (Small nuclear RNA-activating complex polypeptide 2) (snRNA-activating protein complex 45 kDa subunit) (SNAPc 45 kDa subunit) | transcription factor activity, sequence-specific DNA binding [GO:0003700] |
| [248] | O75971 | snRNA-activating protein complex subunit 5 (SNAPc subunit 5) (Small nuclear RNA-activating complex polypeptide 5) (snRNA-activating protein complex 19 kDa subunit) (SNAPc 19 kDa subunit)                                                                                                                               | transcription factor activity, sequence-specific DNA binding [GO:0003700] |
| [249] | Q8TAE8 | Growth arrest and DNA damage-inducible proteins-interacting protein 1 (39S ribosomal protein L59, mitochondrial) (MRP-L59) (CKII beta-associating protein) (CR6-interacting factor 1) (CRIF1) (Papillomavirus L2-interacting nuclear protein 1) (PLINP) (PLINP-1) (p53-responsive gene 6 protein)                        |                                                                           |
| [250] | Q53HC9 | Protein TSSC1 (Tumor-suppressing STF cDNA 1 protein) (Tumor-suppressing subchromosomal transferable fragment candidate gene 1 protein)                                                                                                                                                                                   |                                                                           |

### Proteins annotated as enzymes

| Serial number | Entry  | Protein name                                                                                                                                                                                                                                                                       | GO annotation (molecular function)                                                                                                                                                                                                                                                                                                                                                                                                                                                                              |
|---------------|--------|------------------------------------------------------------------------------------------------------------------------------------------------------------------------------------------------------------------------------------------------------------------------------------|-----------------------------------------------------------------------------------------------------------------------------------------------------------------------------------------------------------------------------------------------------------------------------------------------------------------------------------------------------------------------------------------------------------------------------------------------------------------------------------------------------------------|
| [1]           | Q13131 | 5'-AMP-activated protein kinase catalytic subunit alpha-1 (AMPK subunit alpha-1) (EC 2.7.11.1) (Acetyl-CoA carboxylase kinase) (ACACA kinase) (EC 2.7.11.27) (Hydroxymethylglutaryl-CoA reductase kinase) (HMGCR kinase) (EC 2.7.11.31) (Tau-protein kinase PRKAA1) (EC 2.7.11.26) | [acetyl-CoA carboxylase] kinase activity [GO:0050405]; [hydroxymethylglutaryl-CoA reductase (NADPH)] kinase activity [GO:0047322]; AMP-activated protein kinase activity [GO:0004679]; ATP binding [GO:0005524]; cAMP-dependent protein kinase activity [GO:0004691]; chromatin binding [GO:0003682]; histone serine kinase activity [GO:0035174]; metal ion binding [GO:0046872]; protein kinase activity [GO:0004672]; tau-protein kinase activity [GO:0050321]                                               |
| [2]           | P54646 | 5'-AMP-activated protein kinase catalytic subunit alpha-2 (AMPK subunit alpha-2) (EC 2.7.11.1) (Acetyl-CoA carboxylase kinase) (ACACA kinase) (EC 2.7.11.27) (Hydroxymethylglutaryl-CoA reductase kinase) (HMGCR kinase) (EC 2.7.11.31)                                            | [acetyl-CoA carboxylase] kinase activity [GO:0050405]; [hydroxymethylglutaryl-CoA reductase (NADPH)] kinase activity [GO:0047322]; AMP-activated protein kinase activity [GO:0004679]; ATP binding [GO:0005524]; chromatin binding [GO:0003682]; histone serine kinase activity [GO:0035174]; metal ion binding [GO:0046872]; protein kinase activity [GO:0004672]; protein serine/threonine/tyrosine kinase activity [GO:0004712]; protein serine/threonine kinase activity [GO:0004674]                       |
| [3]           | Q8IZQ1 | WD repeat and FYVE domain-containing protein 3 (Autophagy-linked FYVE protein) (Alfy)                                                                                                                                                                                              | 1-phosphatidylinositol binding [GO:0005545]; beta-N-acetylglucosaminylglycopeptide beta-1,4-galactosyltransferase activity [GO:0003831]; metal ion binding [GO:0046872]                                                                                                                                                                                                                                                                                                                                         |
| [4]           | P31749 | RAC-alpha serine/threonine-protein kinase (EC 2.7.11.1) (Protein kinase B) (PKB) (Protein kinase B alpha) (PKB alpha) (Proto-oncogene c-Akt) (RAC-PK-alpha)                                                                                                                        | 14-3-3 protein binding [GO:0071889]; ATP binding [GO:0005524]; enzyme binding [GO:0019899]; identical protein binding [GO:0042802]; kinase activity [GO:0016301]; nitric-oxide synthase regulator activity [GO:0030235]; phosphatidylinositol-3,4,5-trisphosphate binding [GO:0005547]; phosphatidylinositol-3,4-bisphosphate binding [GO:0043325]; protein kinase activity [GO:0004672]; protein serine/threonine/tyrosine kinase activity [GO:0004712]; protein serine/threonine kinase activity [GO:0004674] |
| [5]           | O15439 | Multidrug resistance-associated protein 4 (ATP-binding cassette sub-family C member 4)                                                                                                                                                                                             | 15-hydroxyprostaglandin dehydrogenase (NAD+) activity [GO:0016404]; ATPase activity, coupled                                                                                                                                                                                                                                                                                                                                                                                                                    |

|      |        |                                                                                                                                                                                                                                                                                                                  |                                                                                                                                                                                                                                                                                                                                                                                                                                                                   |
|------|--------|------------------------------------------------------------------------------------------------------------------------------------------------------------------------------------------------------------------------------------------------------------------------------------------------------------------|-------------------------------------------------------------------------------------------------------------------------------------------------------------------------------------------------------------------------------------------------------------------------------------------------------------------------------------------------------------------------------------------------------------------------------------------------------------------|
|      |        | (MRP/cMOAT-related ABC transporter) (Multi-specific organic anion transporter B) (MOAT-B)                                                                                                                                                                                                                        | to transmembrane movement of substances [GO:0042626]; ATP binding [GO:0005524]                                                                                                                                                                                                                                                                                                                                                                                    |
| [6]  | O15530 | 3-phosphoinositide-dependent protein kinase 1 (hPDK1) (EC 2.7.11.1)                                                                                                                                                                                                                                              | 3-phosphoinositide-dependent protein kinase activity [GO:0004676]; ATP binding [GO:0005524]; phospholipase activator activity [GO:0016004]; phospholipase binding [GO:0043274]; protein serine/threonine kinase activity [GO:0004674]                                                                                                                                                                                                                             |
| [7]  | Q9NVH0 | Exonuclease 3'-5' domain-containing protein 2 (Exonuclease 3'-5' domain-like-containing protein 2)                                                                                                                                                                                                               | 3'-5' exonuclease activity [GO:0008408]; nucleic acid binding [GO:0003676]                                                                                                                                                                                                                                                                                                                                                                                        |
| [8]  | P49643 | DNA primase large subunit (EC 2.7.7.-) (DNA primase 58 kDa subunit) (p58)                                                                                                                                                                                                                                        | 4 iron, 4 sulfur cluster binding [GO:0051539]; DNA binding [GO:0003677]; DNA primase activity [GO:0003896]; metal ion binding [GO:0046872]                                                                                                                                                                                                                                                                                                                        |
| [9]  | Q9H790 | Exonuclease V (Exo V) (hExo5) (EC 3.1.-.-) (Defects in morphology protein 1 homolog)                                                                                                                                                                                                                             | 4 iron, 4 sulfur cluster binding [GO:0051539]; DNA binding [GO:0003677]; metal ion binding [GO:0046872]; protein homodimerization activity [GO:0042803]; single-stranded DNA 3'-5' exodeoxyribonuclease activity [GO:0008310]; single-stranded DNA 5'-3' exodeoxyribonuclease activity [GO:0045145]                                                                                                                                                               |
| [10] | Q6NUM6 | S-adenosyl-L-methionine-dependent tRNA 4-demethylwyosine synthase (EC 4.1.3.44) (Radical S-adenosyl methionine and flavodoxin domain-containing protein 2) (tRNA wybutosine-synthesizing protein 1 homolog B)                                                                                                    | 4 iron, 4 sulfur cluster binding [GO:0051539]; FMN binding [GO:0010181]; iron ion binding [GO:0005506]; lyase activity [GO:0016829]; oxidoreductase activity [GO:0016491]                                                                                                                                                                                                                                                                                         |
| [11] | O75417 | DNA polymerase theta (EC 2.7.7.7) (DNA polymerase eta)                                                                                                                                                                                                                                                           | 5'-deoxyribose-5-phosphate lyase activity [GO:0051575]; ATP binding [GO:0005524]; chromatin binding [GO:0003682]; damaged DNA binding [GO:0003684]; DNA-directed DNA polymerase activity [GO:0003887]; single-stranded DNA-dependent ATPase activity [GO:0043142]                                                                                                                                                                                                 |
| [12] | O95551 | Tyrosyl-DNA phosphodiesterase 2 (Tyr-DNA phosphodiesterase 2) (hTDP2) (EC 3.1.4.-) (5'-tyrosyl-DNA phosphodiesterase) (5'-Tyr-DNA phosphodiesterase) (ETS1-associated protein 2) (ETS1-associated protein II) (EAPII) (TRAF and TNF receptor-associated protein) (Tyrosyl-RNA phosphodiesterase) (VPg unlinkase) | 5'-tyrosyl-DNA phosphodiesterase activity [GO:0070260]; magnesium ion binding [GO:0000287]; manganese ion binding [GO:0030145]; nuclease activity [GO:0004518]; single-stranded DNA binding [GO:0003697]; transcription corepressor activity [GO:0003714]; tyrosyl-RNA phosphodiesterase activity [GO:0036317]                                                                                                                                                    |
| [13] | Q00535 | Cyclin-dependent-like kinase 5 (EC 2.7.11.1) (Cell division protein kinase 5) (Serine/threonine-protein kinase PSSALRE) (Tau protein kinase II catalytic subunit) (TPKII catalytic subunit)                                                                                                                      | acetylcholine receptor activator activity [GO:0030549]; ATP binding [GO:0005524]; cyclin-dependent protein serine/threonine kinase activity [GO:0004693]; ErbB-2 class receptor binding [GO:0005176]; ErbB-3 class receptor binding [GO:0043125]; kinase activity [GO:0016301]; protein kinase activity [GO:0004672]; protein serine/threonine kinase activity [GO:0004674]; tau-protein kinase activity [GO:0050321]                                             |
| [14] | Q09472 | Histone acetyltransferase p300 (p300 HAT) (EC 2.3.1.48) (E1A-associated protein p300)                                                                                                                                                                                                                            | acetyltransferase activity [GO:0016407]; activating transcription factor binding [GO:0033613]; androgen receptor binding [GO:0050681]; antigen binding [GO:0003823]; beta-catenin binding [GO:0008013]; chromatin binding [GO:0003682]; chromatin DNA binding [GO:0031490]; core promoter binding [GO:0001047]; damaged DNA binding [GO:0003684]; DNA binding [GO:0003677]; histone acetyltransferase activity [GO:0004402]; lysine N-acetyltransferase activity, |

|      |        |                                                                                                                                 |                                                                                                                                                                                                                                                                                                                                                                                                                                                                                                                                                                                                                                                                                                                                                                                                                                                                                                                                                                                                                                                                                                                                                                                                   |
|------|--------|---------------------------------------------------------------------------------------------------------------------------------|---------------------------------------------------------------------------------------------------------------------------------------------------------------------------------------------------------------------------------------------------------------------------------------------------------------------------------------------------------------------------------------------------------------------------------------------------------------------------------------------------------------------------------------------------------------------------------------------------------------------------------------------------------------------------------------------------------------------------------------------------------------------------------------------------------------------------------------------------------------------------------------------------------------------------------------------------------------------------------------------------------------------------------------------------------------------------------------------------------------------------------------------------------------------------------------------------|
|      |        |                                                                                                                                 | <p>acting on acetyl phosphate as donor [GO:0004468]; nuclear hormone receptor binding [GO:0035257]; pre-mRNA intronic binding [GO:0097157]; protein C-terminus binding [GO:0008022]; RNA polymerase II activating transcription factor binding [GO:0001102]; RNA polymerase II core promoter proximal region sequence-specific DNA binding [GO:0000978]; RNA polymerase II core promoter sequence-specific DNA binding [GO:0000979]; transcriptional activator activity, RNA polymerase II transcription regulatory region sequence-specific binding [GO:0001228]; transcription coactivator activity [GO:0003713]; transcription factor binding [GO:0008134]; transferase activity, transferring acyl groups [GO:0016746]; zinc ion binding [GO:0008270]</p>                                                                                                                                                                                                                                                                                                                                                                                                                                     |
| [15] | Q92793 | CREB-binding protein (EC 2.3.1.48)                                                                                              | <p>acetyltransferase activity [GO:0016407]; chromatin binding [GO:0003682]; core promoter proximal region sequence-specific DNA binding [GO:0000987]; damaged DNA binding [GO:0003684]; histone acetyltransferase activity [GO:0004402]; MRF binding [GO:0043426]; p53 binding [GO:0002039]; RNA polymerase II activating transcription factor binding [GO:0001102]; RNA polymerase II regulatory region sequence-specific DNA binding [GO:0000977]; RNA polymerase II transcription coactivator activity [GO:0001105]; RNA polymerase II transcription factor binding [GO:0001085]; signal transducer activity [GO:0004871]; transcriptional activator activity, RNA polymerase II transcription regulatory region sequence-specific binding [GO:0001228]; transcriptional repressor activity, RNA polymerase II core promoter proximal region sequence-specific binding [GO:0001078]; transcriptional repressor activity, RNA polymerase II transcription factor binding [GO:0001191]; transcription coactivator activity [GO:0003713]; transcription factor activity, sequence-specific DNA binding [GO:0003700]; transcription factor binding [GO:0008134]; zinc ion binding [GO:0008270]</p> |
| [16] | P31146 | Coronin-1A (Coronin-like protein A) (Clipin-A) (Coronin-like protein p57) (Tryptophan aspartate-containing coat protein) (TACO) | <p>actin binding [GO:0003779]; actin filament binding [GO:0051015]; actin monomer binding [GO:0003785]; cytoskeletal protein binding [GO:0008092]; myosin heavy chain binding [GO:0032036]; phosphatidylinositol 3-kinase binding [GO:0043548]; poly(A) RNA binding [GO:0044822]; protein C-terminus binding [GO:0008022]; protein homodimerization activity [GO:0042803]</p>                                                                                                                                                                                                                                                                                                                                                                                                                                                                                                                                                                                                                                                                                                                                                                                                                     |
| [17] | Q5S007 | Leucine-rich repeat serine/threonine-protein kinase 2 (EC 2.7.11.1) (Dardarin)                                                  | <p>actin binding [GO:0003779]; ATP binding [GO:0005524]; clathrin binding [GO:0030276]; glycoprotein binding [GO:0001948]; GTPase activator activity [GO:0005096]; GTPase activity [GO:0003924]; GTP binding [GO:0005525]; GTP-dependent protein kinase activity [GO:0034211]; identical protein binding [GO:0042802]; ion channel binding [GO:0044325]; kinase activity [GO:0016301]; MAP kinase kinase activity [GO:0004708]; peroxidase inhibitor activity [GO:0036479]; protein homodimerization activity</p>                                                                                                                                                                                                                                                                                                                                                                                                                                                                                                                                                                                                                                                                                 |

|      |        |                                                                                                                                                                                                                                                                          |                                                                                                                                                                                                                                                                                                                                                                                                                                               |
|------|--------|--------------------------------------------------------------------------------------------------------------------------------------------------------------------------------------------------------------------------------------------------------------------------|-----------------------------------------------------------------------------------------------------------------------------------------------------------------------------------------------------------------------------------------------------------------------------------------------------------------------------------------------------------------------------------------------------------------------------------------------|
|      |        |                                                                                                                                                                                                                                                                          | [GO:0042803]; protein kinase A binding [GO:0051018]; protein kinase activity [GO:0004672]; protein serine/threonine kinase activity [GO:0004674]; Rho GTPase binding [GO:0017048]; SNARE binding [GO:0000149]; syntaxin-1 binding [GO:0017075]; tubulin binding [GO:0015631]                                                                                                                                                                  |
| [18] | Q9Y6X6 | Unconventional myosin-XVI (Neuronal tyrosine-phosphorylated phosphoinositide-3-kinase adapter 3) (Unconventional myosin-16)                                                                                                                                              | actin filament binding [GO:0051015]; ATP binding [GO:0005524]; motor activity [GO:0003774]                                                                                                                                                                                                                                                                                                                                                    |
| [19] | Q02156 | Protein kinase C epsilon type (EC 2.7.11.13) (nPKC-epsilon)                                                                                                                                                                                                              | actin monomer binding [GO:0003785]; ATP binding [GO:0005524]; calcium-independent protein kinase C activity [GO:0004699]; enzyme activator activity [GO:0008047]; enzyme binding [GO:0019899]; ethanol binding [GO:0035276]; metal ion binding [GO:0046872]; protein kinase C activity [GO:0004697]; protein serine/threonine kinase activity [GO:0004674]; receptor activator activity [GO:0030546]; signal transducer activity [GO:0004871] |
| [20] | Q8NEV4 | Myosin-IIa (EC 2.7.11.1)                                                                                                                                                                                                                                                 | actin-dependent ATPase activity [GO:0030898]; ADP binding [GO:0043531]; ATP binding [GO:0005524]; calmodulin binding [GO:0005516]; microfilament motor activity [GO:0000146]; plus-end directed microfilament motor activity [GO:0060002]; protein kinase activity [GO:0004672]; protein serine/threonine kinase activity [GO:0004674]                                                                                                        |
| [21] | P36896 | Activin receptor type-1B (EC 2.7.11.30) (Activin receptor type IB) (ACTR-IB) (Activin receptor-like kinase 4) (ALK-4) (Serine/threonine-protein kinase receptor R2) (SKR2)                                                                                               | activin receptor activity, type I [GO:0016361]; ATP binding [GO:0005524]; inhibin binding [GO:0034711]; metal ion binding [GO:0046872]; protein serine/threonine kinase activity [GO:0004674]; receptor signaling protein serine/threonine kinase activity [GO:0004702]; SMAD binding [GO:0046332]; transmembrane receptor protein serine/threonine kinase activity [GO:0004675]; ubiquitin protein ligase binding [GO:0031625]               |
| [22] | P54819 | Adenylate kinase 2, mitochondrial (AK 2) (EC 2.7.4.3) (ATP-AMP transphosphorylase 2) (ATP:AMP phosphotransferase) (Adenylate monophosphate kinase) [Cleaved into: Adenylate kinase 2, mitochondrial, N-terminally processed]                                             | adenylate kinase activity [GO:0004017]; ATP binding [GO:0005524]                                                                                                                                                                                                                                                                                                                                                                              |
| [23] | P27144 | Adenylate kinase 4, mitochondrial (AK 4) (EC 2.7.4.10) (EC 2.7.4.6) (Adenylate kinase 3-like) (GTP:AMP phosphotransferase AK4)                                                                                                                                           | adenylate kinase activity [GO:0004017]; ATP binding [GO:0005524]; GTP binding [GO:0005525]; nucleoside diphosphate kinase activity [GO:0004550]; nucleoside triphosphate adenylate kinase activity [GO:0046899]                                                                                                                                                                                                                               |
| [24] | O14727 | Apoptotic protease-activating factor 1 (APAF-1)                                                                                                                                                                                                                          | ADP binding [GO:0043531]; ATP binding [GO:0005524]; cysteine-type endopeptidase activator activity involved in apoptotic process [GO:0008656]; nucleotide binding [GO:0000166]                                                                                                                                                                                                                                                                |
| [25] | Q8NI60 | Atypical kinase ADCK3, mitochondrial (EC 2.7.-.-) (Chaperone activity of bcl complex-like) (Chaperone-ABC1-like) (aarF domain-containing protein kinase 3)                                                                                                               | ADP binding [GO:0043531]; ATP binding [GO:0005524]; kinase activity [GO:0016301]                                                                                                                                                                                                                                                                                                                                                              |
| [26] | Q03518 | Antigen peptide transporter 1 (APT1) (ATP-binding cassette sub-family B member 2) (Peptide supply factor 1) (Peptide transporter PSF1) (PSF-1) (Peptide transporter TAP1) (Peptide transporter involved in antigen processing 1) (Really interesting new gene 4 protein) | ADP binding [GO:0043531]; ATPase activity, coupled to transmembrane movement of substances [GO:0042626]; ATP binding [GO:0005524]; MHC class Ib protein binding [GO:0023029]; peptide antigen binding [GO:0042605]; peptide transporter activity                                                                                                                                                                                              |



|      |        |                                                                                                                                                                                                |                                                                                                                                                                                                                                                                                                                                                                                                                                                                  |
|------|--------|------------------------------------------------------------------------------------------------------------------------------------------------------------------------------------------------|------------------------------------------------------------------------------------------------------------------------------------------------------------------------------------------------------------------------------------------------------------------------------------------------------------------------------------------------------------------------------------------------------------------------------------------------------------------|
|      |        |                                                                                                                                                                                                | [GO:0015197]; peptide-transporting ATPase activity [GO:0015440]; protein homodimerization activity [GO:0042803]; TAP1 binding [GO:0046978]; TAP2 binding [GO:0046979]                                                                                                                                                                                                                                                                                            |
| [27] | O75891 | Cytosolic 10-formyltetrahydrofolate dehydrogenase (10-FTHFDH) (FDH) (EC 1.5.1.6) (Aldehyde dehydrogenase family 1 member L1)                                                                   | aldehyde dehydrogenase (NAD) activity [GO:0004029]; catalytic activity [GO:0003824]; formyltetrahydrofolate dehydrogenase activity [GO:0016155]; hydroxymethyl-, formyl- and related transferase activity [GO:0016742]; methyltransferase activity [GO:0008168]                                                                                                                                                                                                  |
| [28] | Q3SY69 | Mitochondrial 10-formyltetrahydrofolate dehydrogenase (Mitochondrial 10-FTHFDH) (mtFDH) (EC 1.5.1.6) (Aldehyde dehydrogenase family 1 member L2)                                               | aldehyde dehydrogenase (NAD) activity [GO:0004029]; formyltetrahydrofolate dehydrogenase activity [GO:0016155]; hydroxymethyl-, formyl- and related transferase activity [GO:0016742]; methyltransferase activity [GO:0008168]                                                                                                                                                                                                                                   |
| [29] | P25098 | Beta-adrenergic receptor kinase 1 (Beta-ARK-1) (EC 2.7.11.15) (G-protein coupled receptor kinase 2)                                                                                            | alpha-2A adrenergic receptor binding [GO:0031694]; ATP binding [GO:0005524]; beta-adrenergic receptor kinase activity [GO:0047696]; Edg-2 lysophosphatidic acid receptor binding [GO:0031755]; G-protein coupled receptor kinase activity [GO:0004703]; protein kinase activity [GO:0004672]                                                                                                                                                                     |
| [30] | P10323 | Acrosin (EC 3.4.21.10) [Cleaved into: Acrosin light chain; Acrosin heavy chain]                                                                                                                | amidase activity [GO:0004040]; copper ion binding [GO:0005507]; DNA binding [GO:0003677]; drug binding [GO:0008144]; fucose binding [GO:0042806]; mannose binding [GO:0005537]; serine-type endopeptidase activity [GO:0004252]; zinc ion binding [GO:0008270]                                                                                                                                                                                                   |
| [31] | A6NEY8 | Putative prolyl-tRNA synthetase associated domain-containing protein 1 (PrdX deacylase domain-containing protein 1) (Prolyl-tRNA synthetase associated domain-containing protein 1 pseudogene) | aminoacyl-tRNA editing activity [GO:0002161]                                                                                                                                                                                                                                                                                                                                                                                                                     |
| [32] | Q96FN9 | Probable D-tyrosyl-tRNA(Tyr) deacylase 2 (EC 3.1.-.-) (D-tyrosyl-tRNA deacylase 2)                                                                                                             | aminoacyl-tRNA editing activity [GO:0002161]; D-tyrosyl-tRNA(Tyr) deacylase activity [GO:0051500]                                                                                                                                                                                                                                                                                                                                                                |
| [33] | Q8TEA8 | D-tyrosyl-tRNA(Tyr) deacylase 1 (EC 3.1.-.-) (DNA-unwinding element-binding protein B) (DUE-B) (Histidyl-tRNA synthase-related)                                                                | aminoacyl-tRNA editing activity [GO:0002161]; DNA binding [GO:0003677]; D-tyrosyl-tRNA(Tyr) deacylase activity [GO:0051500]; metal ion binding [GO:0046872]                                                                                                                                                                                                                                                                                                      |
| [34] | P53582 | Methionine aminopeptidase 1 (MAP 1) (MetAP 1) (EC 3.4.11.18) (Peptidase M 1)                                                                                                                   | aminopeptidase activity [GO:0004177]; metal ion binding [GO:0046872]; metalloaminopeptidase activity [GO:0070006]; metalloexopeptidase activity [GO:0008235]                                                                                                                                                                                                                                                                                                     |
| [35] | P53350 | Serine/threonine-protein kinase PLK1 (EC 2.7.11.21) (Polo-like kinase 1) (PLK-1) (Serine/threonine-protein kinase 13) (STPK13)                                                                 | anaphase-promoting complex binding [GO:0010997]; ATP binding [GO:0005524]; kinase activity [GO:0016301]; microtubule binding [GO:0008017]; protein kinase activity [GO:0004672]; protein kinase binding [GO:0019901]; protein serine/threonine kinase activity [GO:0004674]                                                                                                                                                                                      |
| [36] | P05771 | Protein kinase C beta type (PKC-B) (PKC-beta) (EC 2.7.11.13)                                                                                                                                   | androgen receptor binding [GO:0050681]; ATP binding [GO:0005524]; calcium channel regulator activity [GO:0005246]; chromatin binding [GO:0003682]; histone binding [GO:0042393]; histone kinase activity (H3-T6 specific) [GO:0035403]; ligand-dependent nuclear receptor transcription coactivator activity [GO:0030374]; protein kinase C activity [GO:0004697]; protein kinase C binding [GO:0005080]; protein serine/threonine kinase activity [GO:0004674]; |

|      |        |                                                                                                                                                                                                                                                     |                                                                                                                                                                                                                                                                                                                                                                                                                                                                                                                                                                |
|------|--------|-----------------------------------------------------------------------------------------------------------------------------------------------------------------------------------------------------------------------------------------------------|----------------------------------------------------------------------------------------------------------------------------------------------------------------------------------------------------------------------------------------------------------------------------------------------------------------------------------------------------------------------------------------------------------------------------------------------------------------------------------------------------------------------------------------------------------------|
|      |        |                                                                                                                                                                                                                                                     | zinc ion binding [GO:0008270]                                                                                                                                                                                                                                                                                                                                                                                                                                                                                                                                  |
| [37] | Q16512 | Serine/threonine-protein kinase N1 (EC 2.7.11.13) (Protease-activated kinase 1) (PAK-1) (Protein kinase C-like 1) (Protein kinase C-like PKN) (Protein kinase PKN-alpha) (Protein-kinase C-related kinase 1) (Serine-threonine protein kinase N)    | androgen receptor binding [GO:0050681]; ATP binding [GO:0005524]; chromatin binding [GO:0003682]; GTP-Rho binding [GO:0017049]; histone binding [GO:0042393]; histone deacetylase binding [GO:0042826]; histone kinase activity (H3-T11 specific) [GO:0035402]; ligand-dependent nuclear receptor transcription coactivator activity [GO:0030374]; protein kinase activity [GO:0004672]; protein kinase C activity [GO:0004697]; protein kinase C binding [GO:0005080]; protein serine/threonine kinase activity [GO:0004674]; Rac GTPase binding [GO:0048365] |
| [38] | P50613 | Cyclin-dependent kinase 7 (EC 2.7.11.22) (EC 2.7.11.23) (39 kDa protein kinase) (p39 Mo15) (CDK-activating kinase 1) (Cell division protein kinase 7) (Serine/threonine-protein kinase 1) (TFIIH basal transcription factor complex kinase subunit) | androgen receptor binding [GO:0050681]; ATP binding [GO:0005524]; cyclin-dependent protein serine/threonine kinase activity [GO:0004693]; DNA-dependent ATPase activity [GO:0008094]; protein C-terminus binding [GO:0008022]; protein kinase activity [GO:0004672]; RNA polymerase II carboxy-terminal domain kinase activity [GO:0008353]; transcription coactivator activity [GO:0003713]                                                                                                                                                                   |
| [39] | Q9Y4C1 | Lysine-specific demethylase 3A (EC 1.14.11.-) (JmjC domain-containing histone demethylation protein 2A) (Jumonji domain-containing protein 1A)                                                                                                      | androgen receptor binding [GO:0050681]; core promoter binding [GO:0001047]; dioxygenase activity [GO:0051213]; iron ion binding [GO:0005506]; transcription factor activity, sequence-specific DNA binding [GO:0003700]; transcription regulatory region sequence-specific DNA binding [GO:0000976]                                                                                                                                                                                                                                                            |
| [40] | Q9H3R0 | Lysine-specific demethylase 4C (EC 1.14.11.-) (Gene amplified in squamous cell carcinoma 1 protein) (GASC-1 protein) (JmjC domain-containing histone demethylation protein 3C) (Jumonji domain-containing protein 2C)                               | androgen receptor binding [GO:0050681]; dioxygenase activity [GO:0051213]; enzyme binding [GO:0019899]; histone demethylase activity [GO:0032452]; histone demethylase activity (H3-K9 specific) [GO:0032454]; zinc ion binding [GO:0008270]                                                                                                                                                                                                                                                                                                                   |
| [41] | P78317 | E3 ubiquitin-protein ligase RNF4 (EC 6.3.2.-) (RING finger protein 4) (Small nuclear ring finger protein) (Protein SNURF)                                                                                                                           | androgen receptor binding [GO:0050681]; DNA binding [GO:0003677]; identical protein binding [GO:0042802]; ligase activity [GO:0016874]; nucleosome binding [GO:0031491]; SUMO polymer binding [GO:0032184]; transcription coactivator activity [GO:0003713]; transcription factor activity, sequence-specific DNA binding [GO:0003700]; ubiquitin-protein transferase activity [GO:0004842]; zinc ion binding [GO:0008270]                                                                                                                                     |
| [42] | Q92993 | Histone acetyltransferase KAT5 (EC 2.3.1.48) (60 kDa Tat-interactive protein) (Tip60) (Histone acetyltransferase HTATIP) (HIV-1 Tat interactive protein) (Lysine acetyltransferase 5) (cPLA(2)-interacting protein)                                 | androgen receptor binding [GO:0050681]; histone acetyltransferase activity [GO:0004402]; metal ion binding [GO:0046872]; repressing transcription factor binding [GO:0070491]; transcription coactivator activity [GO:0003713]                                                                                                                                                                                                                                                                                                                                 |
| [43] | O95477 | ATP-binding cassette sub-family A member 1 (ATP-binding cassette transporter 1) (ABC-1) (ATP-binding cassette 1) (Cholesterol efflux regulatory protein)                                                                                            | anion transmembrane transporter activity [GO:0008509]; apolipoprotein A-I binding [GO:0034186]; apolipoprotein A-I receptor activity [GO:0034188]; apolipoprotein binding [GO:0034185]; ATPase activity, coupled to transmembrane movement of substances [GO:0042626]; ATPase binding [GO:0051117]; ATP binding [GO:0005524]; cholesterol binding [GO:0015485]; cholesterol transporter activity [GO:0017127]; phospholipid binding [GO:0005543]; phospholipid transporter activity                                                                            |

|      |        |                                                                                                                                                                                                                                |                                                                                                                                                                                                                                                                                                                                                                                   |
|------|--------|--------------------------------------------------------------------------------------------------------------------------------------------------------------------------------------------------------------------------------|-----------------------------------------------------------------------------------------------------------------------------------------------------------------------------------------------------------------------------------------------------------------------------------------------------------------------------------------------------------------------------------|
|      |        |                                                                                                                                                                                                                                | [GO:0005548]; receptor binding [GO:0005102]; small GTPase binding [GO:0031267]; syntaxin binding [GO:0019905]                                                                                                                                                                                                                                                                     |
| [44] | Q5VST9 | Obscurin (EC 2.7.11.1) (Obscurin-RhoGEF) (Obscurin-myosin light chain kinase) (Obscurin-MLCK)                                                                                                                                  | ankyrin binding [GO:0030506]; ATP binding [GO:0005524]; metal ion binding [GO:0046872]; protein serine/threonine kinase activity [GO:0004674]; Rho guanyl-nucleotide exchange factor activity [GO:0005089]; structural constituent of muscle [GO:0008307]; titin binding [GO:0031432]                                                                                             |
| [45] | Q7LBC6 | Lysine-specific demethylase 3B (EC 1.14.11.-) (JmjC domain-containing histone demethylation protein 2B) (Jumonji domain-containing protein 1B) (Nuclear protein 5qNCA)                                                         | antioxidant activity [GO:0016209]; dioxygenase activity [GO:0051213]; metal ion binding [GO:0046872]                                                                                                                                                                                                                                                                              |
| [46] | Q8IZY2 | ATP-binding cassette sub-family A member 7 (ABCA-SSN) (Autoantigen SS-N) (Macrophage ABC transporter)                                                                                                                          | apolipoprotein A-I receptor activity [GO:0034188]; ATPase activity, coupled to transmembrane movement of substances [GO:0042626]; ATP binding [GO:0005524]; cholesterol transporter activity [GO:0017127]; phospholipid transporter activity [GO:0005548]; transporter activity [GO:0005215]                                                                                      |
| [47] | Q86UK0 | ATP-binding cassette sub-family A member 12 (ATP-binding cassette transporter 12) (ATP-binding cassette 12)                                                                                                                    | apolipoprotein A-I receptor binding [GO:0034191]; ATPase activity, coupled to transmembrane movement of substances [GO:0042626]; ATP binding [GO:0005524]; cholesterol transporter activity [GO:0017127]; lipid transporter activity [GO:0005319]; lipid-transporting ATPase activity [GO:0034040]; phospholipid transporter activity [GO:0005548]; receptor binding [GO:0005102] |
| [48] | P08519 | Apolipoprotein(a) (Apo(a)) (Lp(a)) (EC 3.4.21.-)                                                                                                                                                                               | apolipoprotein binding [GO:0034185]; endopeptidase inhibitor activity [GO:0004866]; fibronectin binding [GO:0001968]; heparin binding [GO:0008201]; serine-type endopeptidase activity [GO:0004252]                                                                                                                                                                               |
| [49] | O95260 | Arginyl-tRNA--protein transferase 1 (Arginyltransferase 1) (R-transferase 1) (EC 2.3.2.8) (Arginine-tRNA--protein transferase 1)                                                                                               | arginyltransferase activity [GO:0004057]                                                                                                                                                                                                                                                                                                                                          |
| [50] | O43815 | Striatin                                                                                                                                                                                                                       | armadillo repeat domain binding [GO:0070016]; calmodulin binding [GO:0005516]; estrogen receptor binding [GO:0030331]; protein complex binding [GO:0032403]; protein phosphatase 2A binding [GO:0051721]                                                                                                                                                                          |
| [51] | Q9NRL3 | Striatin-4 (Zinedin)                                                                                                                                                                                                           | armadillo repeat domain binding [GO:0070016]; calmodulin binding [GO:0005516]; protein complex binding [GO:0032403]; protein phosphatase 2A binding [GO:0051721]                                                                                                                                                                                                                  |
| [52] | Q13033 | Striatin-3 (Cell cycle autoantigen SG2NA) (S/G2 antigen)                                                                                                                                                                       | armadillo repeat domain binding [GO:0070016]; calmodulin binding [GO:0005516]; protein complex binding [GO:0032403]; protein phosphatase 2A binding [GO:0051721]; transcription factor activity, sequence-specific DNA binding [GO:0003700]                                                                                                                                       |
| [53] | Q9Y6I0 | Endogenous retrovirus group K member 6 Pro protein (HERV-K(C7) Pro protein) (HERV-K(HML-2.HOM) Pro protein) (HERV-K108 Pro protein) (HERV-K_7p22.1 provirus ancestral Pro protein) (EC 3.4.23.50) (Protease) (Proteinase) (PR) | aspartic-type endopeptidase activity [GO:0004190]; nucleic acid binding [GO:0003676]                                                                                                                                                                                                                                                                                              |
| [54] | P13569 | Cystic fibrosis transmembrane conductance regulator (CFTR) (ATP-binding cassette sub-family C member 7) (Channel conductance-                                                                                                  | ATP binding [GO:0005524]; ATP-binding and phosphorylation-dependent chloride channel activity [GO:0005224]; bicarbonate                                                                                                                                                                                                                                                           |

|      |        |                                                                                                                                                                                  |                                                                                                                                                                                                                                                                                                                                                                                                                                                                |
|------|--------|----------------------------------------------------------------------------------------------------------------------------------------------------------------------------------|----------------------------------------------------------------------------------------------------------------------------------------------------------------------------------------------------------------------------------------------------------------------------------------------------------------------------------------------------------------------------------------------------------------------------------------------------------------|
|      |        | controlling ATPase) (EC 3.6.3.49) (cAMP-dependent chloride channel)                                                                                                              | transmembrane transporter activity [GO:0015106]; channel-conductance-controlling ATPase activity [GO:0005260]; chloride channel activity [GO:0005254]; chloride channel inhibitor activity [GO:0019869]; chloride transmembrane transporter activity [GO:0015108]; enzyme binding [GO:0019899]; PDZ domain binding [GO:0030165]                                                                                                                                |
| [55] | Q8N3C0 | Activating signal cointegrator 1 complex subunit 3 (EC 3.6.4.12) (ASC-1 complex subunit p200) (ASC1p200) (Helicase, ATP binding 1) (Trip4 complex subunit p200)                  | ATP binding [GO:0005524]; ATP-dependent 3'-5' DNA helicase activity [GO:0043140]; poly(A) RNA binding [GO:0044822]                                                                                                                                                                                                                                                                                                                                             |
| [56] | O94762 | ATP-dependent DNA helicase Q5 (EC 3.6.4.12) (DNA helicase, RecQ-like type 5) (RecQ5) (RecQ protein-like 5)                                                                       | ATP binding [GO:0005524]; ATP-dependent helicase activity [GO:0008026]; DNA helicase activity [GO:0003678]; nucleic acid binding [GO:0003676]; RNA polymerase II core binding [GO:0000993]                                                                                                                                                                                                                                                                     |
| [57] | P43250 | G protein-coupled receptor kinase 6 (EC 2.7.11.16) (G protein-coupled receptor kinase GRK6)                                                                                      | ATP binding [GO:0005524]; beta-adrenergic receptor kinase activity [GO:0047696]; G-protein coupled receptor kinase activity [GO:0004703]                                                                                                                                                                                                                                                                                                                       |
| [58] | P34947 | G protein-coupled receptor kinase 5 (EC 2.7.11.16) (G protein-coupled receptor kinase GRK5)                                                                                      | ATP binding [GO:0005524]; beta-adrenergic receptor kinase activity [GO:0047696]; G-protein coupled receptor kinase activity [GO:0004703]; phospholipid binding [GO:0005543]; protein kinase C binding [GO:0005080]; protein serine/threonine kinase activity [GO:0004674]                                                                                                                                                                                      |
| [59] | P35626 | Beta-adrenergic receptor kinase 2 (Beta-ARK-2) (EC 2.7.11.15) (G-protein-coupled receptor kinase 3)                                                                              | ATP binding [GO:0005524]; beta-adrenergic receptor kinase activity [GO:0047696]; G-protein coupled receptor kinase activity [GO:0004703]; protein kinase activity [GO:0004672]                                                                                                                                                                                                                                                                                 |
| [60] | P49841 | Glycogen synthase kinase-3 beta (GSK-3 beta) (EC 2.7.11.26) (Serine/threonine-protein kinase GSK3B) (EC 2.7.11.1)                                                                | ATP binding [GO:0005524]; beta-catenin binding [GO:0008013]; kinase activity [GO:0016301]; NF-kappaB binding [GO:0051059]; p53 binding [GO:0002039]; protein kinase A catalytic subunit binding [GO:0034236]; protein kinase binding [GO:0019901]; protein serine/threonine kinase activity [GO:0004674]; RNA polymerase II transcription factor binding [GO:0001085]; tau-protein kinase activity [GO:0050321]; ubiquitin protein ligase binding [GO:0031625] |
| [61] | Q02779 | Mitogen-activated protein kinase kinase kinase 10 (EC 2.7.11.25) (Mixed lineage kinase 2) (Protein kinase MST)                                                                   | ATP binding [GO:0005524]; bHLH transcription factor binding [GO:0043425]; JUN kinase kinase activity [GO:0004706]; protein homodimerization activity [GO:0042803]; protein kinase activity [GO:0004672]; protein serine/threonine kinase activity [GO:0004674]; transcription corepressor activity [GO:0003714]                                                                                                                                                |
| [62] | O95342 | Bile salt export pump (ATP-binding cassette sub-family B member 11)                                                                                                              | ATP binding [GO:0005524]; bile acid-exporting ATPase activity [GO:0015432]; canalicular bile acid transmembrane transporter activity [GO:0015126]; sodium-exporting ATPase activity, phosphorylative mechanism [GO:0008554]; transporter activity [GO:0005215]                                                                                                                                                                                                 |
| [63] | Q13976 | cGMP-dependent protein kinase 1 (cGK 1) (cGK1) (EC 2.7.11.12) (cGMP-dependent protein kinase I) (cGKI)                                                                           | ATP binding [GO:0005524]; calcium channel regulator activity [GO:0005246]; cGMP binding [GO:0030553]; cGMP-dependent protein kinase activity [GO:0004692]                                                                                                                                                                                                                                                                                                      |
| [64] | Q96BR1 | Serine/threonine-protein kinase Sgk3 (EC 2.7.11.1) (Cytokine-independent survival kinase) (Serum/glucocorticoid-regulated kinase 3) (Serum/glucocorticoid-regulated kinase-like) | ATP binding [GO:0005524]; calcium channel regulator activity [GO:0005246]; chloride channel regulator activity [GO:0017081]; phosphatidylinositol binding [GO:0035091]; potassium channel regulator activity                                                                                                                                                                                                                                                   |

|      |        |                                                                                                                                                                                                                              |                                                                                                                                                                                                                                                                                                                                                                                                            |
|------|--------|------------------------------------------------------------------------------------------------------------------------------------------------------------------------------------------------------------------------------|------------------------------------------------------------------------------------------------------------------------------------------------------------------------------------------------------------------------------------------------------------------------------------------------------------------------------------------------------------------------------------------------------------|
|      |        |                                                                                                                                                                                                                              | [GO:0015459]; protein kinase activity [GO:0004672]; protein serine/threonine kinase activity [GO:0004674]; sodium channel regulator activity [GO:0017080]                                                                                                                                                                                                                                                  |
| [65] | Q9HBY8 | Serine/threonine-protein kinase Sgk2 (EC 2.7.11.1) (Serum/glucocorticoid-regulated kinase 2)                                                                                                                                 | ATP binding [GO:0005524]; calcium channel regulator activity [GO:0005246]; chloride channel regulator activity [GO:0017081]; potassium channel regulator activity [GO:0015459]; protein serine/threonine kinase activity [GO:0004674]; sodium channel regulator activity [GO:0017080]                                                                                                                      |
| [66] | O00141 | Serine/threonine-protein kinase Sgk1 (EC 2.7.11.1) (Serum/glucocorticoid-regulated kinase 1)                                                                                                                                 | ATP binding [GO:0005524]; calcium channel regulator activity [GO:0005246]; chloride channel regulator activity [GO:0017081]; potassium channel regulator activity [GO:0015459]; protein serine/threonine/tyrosine kinase activity [GO:0004712]; protein serine/threonine kinase activity [GO:0004674]; sodium channel regulator activity [GO:0017080]                                                      |
| [67] | Q96RR4 | Calcium/calmodulin-dependent protein kinase kinase 2 (CaM-KK 2) (CaM-kinase kinase 2) (CaMKK 2) (EC 2.7.11.17) (Calcium/calmodulin-dependent protein kinase kinase beta) (CaM-KK beta) (CaM-kinase kinase beta) (CaMKK beta) | ATP binding [GO:0005524]; calcium ion binding [GO:0005509]; calmodulin binding [GO:0005516]; calmodulin-dependent protein kinase activity [GO:0004683]; protein tyrosine kinase activity [GO:0004713]                                                                                                                                                                                                      |
| [68] | P15056 | Serine/threonine-protein kinase B-raf (EC 2.7.11.1) (Proto-oncogene B-Raf) (p94) (v-Raf murine sarcoma viral oncogene homolog B1)                                                                                            | ATP binding [GO:0005524]; calcium ion binding [GO:0005509]; identical protein binding [GO:0042802]; MAP kinase kinase kinase activity [GO:0004709]; protein kinase activity [GO:0004672]; protein serine/threonine kinase activity [GO:0004674]                                                                                                                                                            |
| [69] | Q14680 | Maternal embryonic leucine zipper kinase (hMELK) (EC 2.7.11.1) (Protein kinase Eg3) (pEg3 kinase) (Protein kinase PK38) (hPK38) (Tyrosine-protein kinase MELK) (EC 2.7.10.2)                                                 | ATP binding [GO:0005524]; calcium ion binding [GO:0005509]; lipid binding [GO:0008289]; non-membrane spanning protein tyrosine kinase activity [GO:0004715]; protein serine/threonine kinase activity [GO:0004674]                                                                                                                                                                                         |
| [70] | P17252 | Protein kinase C alpha type (PKC-A) (PKC-alpha) (EC 2.7.11.13)                                                                                                                                                               | ATP binding [GO:0005524]; calcium-dependent protein kinase C activity [GO:0004698]; enzyme binding [GO:0019899]; histone kinase activity (H3-T6 specific) [GO:0035403]; protein kinase activity [GO:0004672]; protein kinase C activity [GO:0004697]; protein serine/threonine kinase activity [GO:0004674]; zinc ion binding [GO:0008270]                                                                 |
| [71] | P05129 | Protein kinase C gamma type (PKC-gamma) (EC 2.7.11.13)                                                                                                                                                                       | ATP binding [GO:0005524]; calcium-dependent protein kinase C activity [GO:0004698]; protein kinase activity [GO:0004672]; protein kinase C activity [GO:0004697]; protein serine/threonine/tyrosine kinase activity [GO:0004712]; zinc ion binding [GO:0008270]                                                                                                                                            |
| [72] | Q16566 | Calcium/calmodulin-dependent protein kinase type IV (CaMK IV) (EC 2.7.11.17) (CaM kinase-GR)                                                                                                                                 | ATP binding [GO:0005524]; calcium-dependent protein serine/threonine kinase activity [GO:0009931]; calmodulin binding [GO:0005516]; calmodulin-dependent protein kinase activity [GO:0004683]                                                                                                                                                                                                              |
| [73] | Q8IW41 | MAP kinase-activated protein kinase 5 (MAPK-activated protein kinase 5) (MAPKAP kinase 5) (MAPKAP-K5) (MAPKAPK-5) (MK-5) (MK5) (EC 2.7.11.1) (p38-regulated/activated protein kinase) (PRAK)                                 | ATP binding [GO:0005524]; calcium-dependent protein serine/threonine kinase activity [GO:0009931]; calmodulin binding [GO:0005516]; calmodulin-dependent protein kinase activity [GO:0004683]; MAP kinase kinase activity [GO:0004708]; mitogen-activated protein kinase binding [GO:0051019]; p53 binding [GO:0002039]; protein serine/threonine kinase activity [GO:0004674]; signal transducer activity |

|      |        |                                                                                                                                                                                                                                                                     |                                                                                                                                                                                                                                                                                                                                                                                                                                                      |
|------|--------|---------------------------------------------------------------------------------------------------------------------------------------------------------------------------------------------------------------------------------------------------------------------|------------------------------------------------------------------------------------------------------------------------------------------------------------------------------------------------------------------------------------------------------------------------------------------------------------------------------------------------------------------------------------------------------------------------------------------------------|
|      |        |                                                                                                                                                                                                                                                                     | [GO:0004871]                                                                                                                                                                                                                                                                                                                                                                                                                                         |
| [74] | Q16644 | MAP kinase-activated protein kinase 3 (MAPK-activated protein kinase 3) (MAPKAP kinase 3) (MAPKAP-K3) (MAPKAPK-3) (MK-3) (EC 2.7.11.1) (Chromosome 3p kinase) (3pK)                                                                                                 | ATP binding [GO:0005524]; calcium-dependent protein serine/threonine kinase activity [GO:0009931]; calmodulin binding [GO:0005516]; calmodulin-dependent protein kinase activity [GO:0004683]; MAP kinase kinase activity [GO:0004708]; mitogen-activated protein kinase binding [GO:0051019]; protein serine/threonine kinase activity [GO:0004674]; signal transducer activity [GO:0004871]                                                        |
| [75] | Q9HBH9 | MAP kinase-interacting serine/threonine-protein kinase 2 (EC 2.7.11.1) (MAP kinase signal-integrating kinase 2) (MAPK signal-integrating kinase 2) (Mnk2)                                                                                                           | ATP binding [GO:0005524]; calcium-dependent protein serine/threonine kinase activity [GO:0009931]; calmodulin binding [GO:0005516]; calmodulin-dependent protein kinase activity [GO:0004683]; metal ion binding [GO:0046872]; protein serine/threonine kinase activity [GO:0004674]                                                                                                                                                                 |
| [76] | Q13555 | Calcium/calmodulin-dependent protein kinase type II subunit gamma (CaM kinase II subunit gamma) (CaMK-II subunit gamma) (EC 2.7.11.17)                                                                                                                              | ATP binding [GO:0005524]; calcium-dependent protein serine/threonine phosphatase activity [GO:0004723]; calmodulin binding [GO:0005516]; calmodulin-dependent protein kinase activity [GO:0004683]; protein homodimerization activity [GO:0042803]                                                                                                                                                                                                   |
| [77] | Q05655 | Protein kinase C delta type (EC 2.7.11.13) (Tyrosine-protein kinase PRKCD) (EC 2.7.10.2) (nPKC-delta) [Cleaved into: Protein kinase C delta type regulatory subunit; Protein kinase C delta type catalytic subunit (Sphingosine-dependent protein kinase-1) (SDK1)] | ATP binding [GO:0005524]; calcium-independent protein kinase C activity [GO:0004699]; enzyme activator activity [GO:0008047]; enzyme binding [GO:0019899]; insulin receptor substrate binding [GO:0043560]; metal ion binding [GO:0046872]; non-membrane spanning protein tyrosine kinase activity [GO:0004715]; protein kinase activity [GO:0004672]; protein kinase C activity [GO:0004697]; protein serine/threonine kinase activity [GO:0004674] |
| [78] | P24723 | Protein kinase C eta type (EC 2.7.11.13) (PKC-L) (nPKC-eta)                                                                                                                                                                                                         | ATP binding [GO:0005524]; calcium-independent protein kinase C activity [GO:0004699]; enzyme binding [GO:0019899]; metal ion binding [GO:0046872]; protein kinase C activity [GO:0004697]                                                                                                                                                                                                                                                            |
| [79] | Q9UQM7 | Calcium/calmodulin-dependent protein kinase type II subunit alpha (CaM kinase II subunit alpha) (CaMK-II subunit alpha) (EC 2.7.11.17)                                                                                                                              | ATP binding [GO:0005524]; calmodulin binding [GO:0005516]; calmodulin-dependent protein kinase activity [GO:0004683]; glutamate receptor binding [GO:0035254]; kinase activity [GO:0016301]; protein homodimerization activity [GO:0042803]; protein serine/threonine kinase activity [GO:0004674]                                                                                                                                                   |
| [80] | P53355 | Death-associated protein kinase 1 (DAP kinase 1) (EC 2.7.11.1)                                                                                                                                                                                                      | ATP binding [GO:0005524]; calmodulin binding [GO:0005516]; calmodulin-dependent protein kinase activity [GO:0004683]; GTP binding [GO:0005525]; identical protein binding [GO:0042802]; protein kinase activity [GO:0004672]; protein serine/threonine kinase activity [GO:0004674]; syntaxin-1 binding [GO:0017075]                                                                                                                                 |
| [81] | Q9UIK4 | Death-associated protein kinase 2 (DAP kinase 2) (EC 2.7.11.1) (DAP-kinase-related protein 1) (DRP-1)                                                                                                                                                               | ATP binding [GO:0005524]; calmodulin binding [GO:0005516]; calmodulin-dependent protein kinase activity [GO:0004683]; identical protein binding [GO:0042802]; protein serine/threonine kinase activity [GO:0004674]                                                                                                                                                                                                                                  |
| [82] | Q13557 | Calcium/calmodulin-dependent protein kinase type II subunit delta (CaM kinase II subunit delta) (CaMK-II subunit delta) (EC 2.7.11.17)                                                                                                                              | ATP binding [GO:0005524]; calmodulin binding [GO:0005516]; calmodulin-dependent protein kinase activity [GO:0004683]; ion channel binding [GO:0044325]; protein homodimerization activity                                                                                                                                                                                                                                                            |

|      |        |                                                                                                                                                                                                                                                         |                                                                                                                                                                                                                                                                                                                                                                             |
|------|--------|---------------------------------------------------------------------------------------------------------------------------------------------------------------------------------------------------------------------------------------------------------|-----------------------------------------------------------------------------------------------------------------------------------------------------------------------------------------------------------------------------------------------------------------------------------------------------------------------------------------------------------------------------|
|      |        |                                                                                                                                                                                                                                                         | [GO:0042803]; protein serine/threonine kinase activity [GO:0004674]; sodium channel inhibitor activity [GO:0019871]; titin binding [GO:0031432]                                                                                                                                                                                                                             |
| [83] | Q9H1R3 | Myosin light chain kinase 2, skeletal/cardiac muscle (MLCK2) (EC 2.7.11.18)                                                                                                                                                                             | ATP binding [GO:0005524]; calmodulin binding [GO:0005516]; calmodulin-dependent protein kinase activity [GO:0004683]; myosin light chain kinase activity [GO:0004687]                                                                                                                                                                                                       |
| [84] | Q8N5S9 | Calcium/calmodulin-dependent protein kinase kinase 1 (CaM-KK 1) (CaM-kinase kinase 1) (CaMKK 1) (EC 2.7.11.17) (CaM-kinase IV kinase) (Calcium/calmodulin-dependent protein kinase kinase alpha) (CaM-KK alpha) (CaM-kinase kinase alpha) (CaMKK alpha) | ATP binding [GO:0005524]; calmodulin-dependent protein kinase activity [GO:0004683]                                                                                                                                                                                                                                                                                         |
| [85] | Q14012 | Calcium/calmodulin-dependent protein kinase type 1 (EC 2.7.11.17) (CaM kinase I) (CaM-KI) (CaM kinase I alpha) (CaMKI-alpha)                                                                                                                            | ATP binding [GO:0005524]; calmodulin-dependent protein kinase activity [GO:0004683]                                                                                                                                                                                                                                                                                         |
| [86] | Q6P2M8 | Calcium/calmodulin-dependent protein kinase type 1B (EC 2.7.11.17) (CaM kinase I beta) (CaM kinase IB) (CaM-KI beta) (CaMKI-beta) (Pregnancy up-regulated non-ubiquitously-expressed CaM kinase)                                                        | ATP binding [GO:0005524]; calmodulin-dependent protein kinase activity [GO:0004683]                                                                                                                                                                                                                                                                                         |
| [87] | Q8IU85 | Calcium/calmodulin-dependent protein kinase type 1D (EC 2.7.11.17) (CaM kinase I delta) (CaM kinase ID) (CaM-KI delta) (CaMKI delta) (CaMKID) (CaMKI-like protein kinase) (CKLiK)                                                                       | ATP binding [GO:0005524]; calmodulin-dependent protein kinase activity [GO:0004683]                                                                                                                                                                                                                                                                                         |
| [88] | Q96NX5 | Calcium/calmodulin-dependent protein kinase type 1G (EC 2.7.11.17) (CaM kinase I gamma) (CaM kinase IG) (CaM-KI gamma) (CaMKI gamma) (CaMKIG) (CaMK-like CREB kinase III) (CLICK III)                                                                   | ATP binding [GO:0005524]; calmodulin-dependent protein kinase activity [GO:0004683]                                                                                                                                                                                                                                                                                         |
| [89] | O43293 | Death-associated protein kinase 3 (DAP kinase 3) (EC 2.7.11.1) (DAP-like kinase) (Dlk) (MYPT1 kinase) (Zipper-interacting protein kinase) (ZIP-kinase)                                                                                                  | ATP binding [GO:0005524]; calmodulin-dependent protein kinase activity [GO:0004683]; cAMP response element binding protein binding [GO:0008140]; identical protein binding [GO:0042802]; leucine zipper domain binding [GO:0043522]; protein homodimerization activity [GO:0042803]; protein serine/threonine kinase activity [GO:0004674]; Rho GTPase binding [GO:0017048] |
| [90] | Q15746 | Myosin light chain kinase, smooth muscle (MLCK) (smMLCK) (EC 2.7.11.18) (Kinase-related protein) (KRP) (Telokin) [Cleaved into: Myosin light chain kinase, smooth muscle, deglutamylated form]                                                          | ATP binding [GO:0005524]; calmodulin-dependent protein kinase activity [GO:0004683]; metal ion binding [GO:0046872]; myosin light chain kinase activity [GO:0004687]                                                                                                                                                                                                        |
| [91] | Q32MK0 | Myosin light chain kinase 3 (EC 2.7.11.18) (Cardiac-MyBP-C-associated Ca/CaM kinase) (Cardiac-MLCK)                                                                                                                                                     | ATP binding [GO:0005524]; calmodulin-dependent protein kinase activity [GO:0004683]; myosin light chain kinase activity [GO:0004687]                                                                                                                                                                                                                                        |
| [92] | Q13554 | Calcium/calmodulin-dependent protein kinase type II subunit beta (CaM kinase II subunit beta) (CaMK-II subunit beta) (EC 2.7.11.17)                                                                                                                     | ATP binding [GO:0005524]; calmodulin-dependent protein kinase activity [GO:0004683]; protein homodimerization activity [GO:0042803]                                                                                                                                                                                                                                         |
| [93] | P22612 | cAMP-dependent protein kinase catalytic subunit gamma (PKA C-gamma) (EC 2.7.11.11)                                                                                                                                                                      | ATP binding [GO:0005524]; cAMP-dependent protein kinase activity [GO:0004691]                                                                                                                                                                                                                                                                                               |
| [94] | P51817 | cAMP-dependent protein kinase catalytic subunit PRKX (PrKX) (Protein kinase X) (Protein kinase X-linked) (Serine/threonine-protein kinase PRKX) (EC 2.7.11.1) (Protein kinase PKX1)                                                                     | ATP binding [GO:0005524]; cAMP-dependent protein kinase activity [GO:0004691]                                                                                                                                                                                                                                                                                               |
| [95] | P22694 | cAMP-dependent protein kinase catalytic subunit beta (PKA C-beta) (EC 2.7.11.11)                                                                                                                                                                        | ATP binding [GO:0005524]; cAMP-dependent protein kinase activity [GO:0004691]; magnesium ion binding [GO:0000287]; ubiquitin protein ligase binding [GO:0031625]                                                                                                                                                                                                            |
| [96] | P17612 | cAMP-dependent protein kinase catalytic subunit                                                                                                                                                                                                         | ATP binding [GO:0005524]; cAMP-dependent                                                                                                                                                                                                                                                                                                                                    |

|       |        |                                                                                                                                                                                                |                                                                                                                                                                                                                                                                                                                                                                                                                                                                                                                             |
|-------|--------|------------------------------------------------------------------------------------------------------------------------------------------------------------------------------------------------|-----------------------------------------------------------------------------------------------------------------------------------------------------------------------------------------------------------------------------------------------------------------------------------------------------------------------------------------------------------------------------------------------------------------------------------------------------------------------------------------------------------------------------|
|       |        | alpha (PKA C-alpha) (EC 2.7.11.11)                                                                                                                                                             | protein kinase activity [GO:0004691]; protein kinase A regulatory subunit binding [GO:0034237]; protein kinase binding [GO:0019901]; protein serine/threonine/tyrosine kinase activity [GO:0004712]; ubiquitin protein ligase binding [GO:0031625]                                                                                                                                                                                                                                                                          |
| [97]  | P43246 | DNA mismatch repair protein Msh2 (hMSH2) (MutS protein homolog 2)                                                                                                                              | ATP binding [GO:0005524]; centromeric DNA binding [GO:0019237]; damaged DNA binding [GO:0003684]; DNA binding [GO:0003677]; DNA-dependent ATPase activity [GO:0008094]; double-strand/single-strand DNA junction binding [GO:0000406]; enzyme binding [GO:0019899]; guanine/thymine mispair binding [GO:0032137]; heteroduplex DNA loop binding [GO:0000404]; protein C-terminus binding [GO:0008022]; protein homodimerization activity [GO:0042803]; protein kinase binding [GO:0019901]; Y-form DNA binding [GO:0000403] |
| [98]  | P20585 | DNA mismatch repair protein Msh3 (hMSH3) (Divergent upstream protein) (DUP) (Mismatch repair protein 1) (MRP1)                                                                                 | ATP binding [GO:0005524]; centromeric DNA binding [GO:0019237]; damaged DNA binding [GO:0003684]; DNA-dependent ATPase activity [GO:0008094]; double-strand/single-strand DNA junction binding [GO:0000406]; enzyme binding [GO:0019899]; heteroduplex DNA loop binding [GO:0000404]; Y-form DNA binding [GO:0000403]                                                                                                                                                                                                       |
| [99]  | Q13237 | cGMP-dependent protein kinase 2 (cGK 2) (cGK2) (EC 2.7.11.12) (cGMP-dependent protein kinase II) (cGKII)                                                                                       | ATP binding [GO:0005524]; cGMP binding [GO:0030553]; cGMP-dependent protein kinase activity [GO:0004692]; protein kinase activity [GO:0004672]                                                                                                                                                                                                                                                                                                                                                                              |
| [100] | Q9H4A3 | Serine/threonine-protein kinase WNK1 (EC 2.7.11.1) (Erythrocyte 65 kDa protein) (p65) (Kinase deficient protein) (Protein kinase lysine-deficient 1) (Protein kinase with no lysine 1) (hWNK1) | ATP binding [GO:0005524]; chloride channel inhibitor activity [GO:0019869]; phosphatase binding [GO:0019902]; protein kinase inhibitor activity [GO:0004860]; protein serine/threonine kinase activity [GO:0004674]                                                                                                                                                                                                                                                                                                         |
| [101] | Q9BYP7 | Serine/threonine-protein kinase WNK3 (EC 2.7.11.1) (Protein kinase lysine-deficient 3) (Protein kinase with no lysine 3)                                                                       | ATP binding [GO:0005524]; chloride channel inhibitor activity [GO:0019869]; protein kinase activity [GO:0004672]; protein serine/threonine kinase activity [GO:0004674]                                                                                                                                                                                                                                                                                                                                                     |
| [102] | Q96J92 | Serine/threonine-protein kinase WNK4 (EC 2.7.11.1) (Protein kinase lysine-deficient 4) (Protein kinase with no lysine 4)                                                                       | ATP binding [GO:0005524]; chloride channel inhibitor activity [GO:0019869]; protein serine/threonine kinase activity [GO:0004674]                                                                                                                                                                                                                                                                                                                                                                                           |
| [103] | Q8IYD8 | Fanconi anemia group M protein (Protein FACM) (EC 3.6.4.13) (ATP-dependent RNA helicase FANCM) (Fanconi anemia-associated polypeptide of 250 kDa) (FAAP250) (Protein Hef ortholog)             | ATP binding [GO:0005524]; chromatin binding [GO:0003682]; DNA binding [GO:0003677]; helicase activity [GO:0004386]; nuclease activity [GO:0004518]                                                                                                                                                                                                                                                                                                                                                                          |
| [104] | Q13153 | Serine/threonine-protein kinase PAK 1 (EC 2.7.11.1) (Alpha-PAK) (p21-activated kinase 1) (PAK-1) (p65-PAK)                                                                                     | ATP binding [GO:0005524]; collagen binding [GO:0005518]; protein kinase activity [GO:0004672]; protein serine/threonine kinase activity [GO:0004674]; Rac GTPase binding [GO:0048365]                                                                                                                                                                                                                                                                                                                                       |
| [105] | O95819 | Mitogen-activated protein kinase kinase kinase 4 (EC 2.7.11.1) (HPK/GCK-like kinase HGK) (MAPK/ERK kinase kinase kinase 4) (MEK kinase kinase 4) (MEKKK 4) (Nck-interacting kinase)            | ATP binding [GO:0005524]; creatine kinase activity [GO:0004111]; protein serine/threonine kinase activity [GO:0004674]                                                                                                                                                                                                                                                                                                                                                                                                      |
| [106] | O94921 | Cyclin-dependent kinase 14 (EC 2.7.11.22) (Cell division protein kinase 14) (Serine/threonine-protein kinase PFTAIRES-1) (hPFTAIRES1)                                                          | ATP binding [GO:0005524]; cyclin binding [GO:0030332]; cyclin-dependent protein serine/threonine kinase activity [GO:0004693]                                                                                                                                                                                                                                                                                                                                                                                               |
| [107] | Q00534 | Cyclin-dependent kinase 6 (EC 2.7.11.22) (Cell division protein kinase 6) (Serine/threonine-protein kinase PLSTIRE)                                                                            | ATP binding [GO:0005524]; cyclin binding [GO:0030332]; cyclin-dependent protein serine/threonine kinase activity [GO:0004693]                                                                                                                                                                                                                                                                                                                                                                                               |



|       |        |                                                                                                                                                                                                                                                            |                                                                                                                                                                                                                                                                               |
|-------|--------|------------------------------------------------------------------------------------------------------------------------------------------------------------------------------------------------------------------------------------------------------------|-------------------------------------------------------------------------------------------------------------------------------------------------------------------------------------------------------------------------------------------------------------------------------|
| [108] | P11802 | Cyclin-dependent kinase 4 (EC 2.7.11.22) (Cell division protein kinase 4) (PSK-J3)                                                                                                                                                                         | ATP binding [GO:0005524]; cyclin binding [GO:0030332]; cyclin-dependent protein serine/threonine kinase activity [GO:0004693]; cyclin-dependent protein serine/threonine kinase regulator activity [GO:0016538]                                                               |
| [109] | P24941 | Cyclin-dependent kinase 2 (EC 2.7.11.22) (Cell division protein kinase 2) (p33 protein kinase)                                                                                                                                                             | ATP binding [GO:0005524]; cyclin binding [GO:0030332]; cyclin-dependent protein serine/threonine kinase activity [GO:0004693]; metal ion binding [GO:0046872]                                                                                                                 |
| [110] | Q14004 | Cyclin-dependent kinase 13 (EC 2.7.11.22) (EC 2.7.11.23) (CDC2-related protein kinase 5) (Cell division cycle 2-like protein kinase 5) (Cell division protein kinase 13) (hCDK13) (Cholinesterase-related cell division controller)                        | ATP binding [GO:0005524]; cyclin binding [GO:0030332]; cyclin-dependent protein serine/threonine kinase activity [GO:0004693]; poly(A) RNA binding [GO:0044822]; protein kinase activity [GO:0004672]; RNA polymerase II carboxy-terminal domain kinase activity [GO:0008353] |
| [111] | Q15131 | Cyclin-dependent kinase 10 (EC 2.7.11.22) (Cell division protein kinase 10) (Serine/threonine-protein kinase PISSLRE)                                                                                                                                      | ATP binding [GO:0005524]; cyclin-dependent protein serine/threonine kinase activity [GO:0004693]                                                                                                                                                                              |
| [112] | Q07002 | Cyclin-dependent kinase 18 (EC 2.7.11.22) (Cell division protein kinase 18) (PCTAIRE-motif protein kinase 3) (Serine/threonine-protein kinase PCTAIRE-3)                                                                                                   | ATP binding [GO:0005524]; cyclin-dependent protein serine/threonine kinase activity [GO:0004693]                                                                                                                                                                              |
| [113] | Q8IZL9 | Cyclin-dependent kinase 20 (EC 2.7.11.22) (CDK-activating kinase p42) (CAK-kinase p42) (Cell cycle-related kinase) (Cell division protein kinase 20) (Cyclin-dependent protein kinase H) (Cyclin-kinase-activating kinase p42)                             | ATP binding [GO:0005524]; cyclin-dependent protein serine/threonine kinase activity [GO:0004693]                                                                                                                                                                              |
| [114] | Q00526 | Cyclin-dependent kinase 3 (EC 2.7.11.22) (Cell division protein kinase 3)                                                                                                                                                                                  | ATP binding [GO:0005524]; cyclin-dependent protein serine/threonine kinase activity [GO:0004693]                                                                                                                                                                              |
| [115] | Q00532 | Cyclin-dependent kinase-like 1 (EC 2.7.11.22) (Protein kinase p42 KKIALRE) (Serine/threonine-protein kinase KKIALRE)                                                                                                                                       | ATP binding [GO:0005524]; cyclin-dependent protein serine/threonine kinase activity [GO:0004693]                                                                                                                                                                              |
| [116] | Q5MAI5 | Cyclin-dependent kinase-like 4 (EC 2.7.11.22)                                                                                                                                                                                                              | ATP binding [GO:0005524]; cyclin-dependent protein serine/threonine kinase activity [GO:0004693]                                                                                                                                                                              |
| [117] | O76039 | Cyclin-dependent kinase-like 5 (EC 2.7.11.22) (Serine/threonine-protein kinase 9)                                                                                                                                                                          | ATP binding [GO:0005524]; cyclin-dependent protein serine/threonine kinase activity [GO:0004693]; kinase activity [GO:0016301]; protein kinase activity [GO:0004672]; protein serine/threonine kinase activity [GO:0004674]; Rac GTPase binding [GO:0048365]                  |
| [118] | Q96Q40 | Cyclin-dependent kinase 15 (EC 2.7.11.22) (Amyotrophic lateral sclerosis 2 chromosomal region candidate gene 7 protein) (Cell division protein kinase 15) (Serine/threonine-protein kinase ALS2CR7) (Serine/threonine-protein kinase PFTAIRE-2)            | ATP binding [GO:0005524]; cyclin-dependent protein serine/threonine kinase activity [GO:0004693]; metal ion binding [GO:0046872]; protein serine/threonine kinase activity [GO:0004674]                                                                                       |
| [119] | P21127 | Cyclin-dependent kinase 11B (EC 2.7.11.22) (Cell division cycle 2-like protein kinase 1) (CLK-1) (Cell division protein kinase 11B) (Galactosyltransferase-associated protein kinase p58/GTA) (PITSLRE serine/threonine-protein kinase CDC2L1) (p58 CLK-1) | ATP binding [GO:0005524]; cyclin-dependent protein serine/threonine kinase activity [GO:0004693]; poly(A) RNA binding [GO:0044822]; protein kinase activity [GO:0004672]; protein serine/threonine kinase activity [GO:0004674]                                               |
| [120] | Q00537 | Cyclin-dependent kinase 17 (EC 2.7.11.22) (Cell division protein kinase 17) (PCTAIRE-motif protein kinase 2) (Serine/threonine-protein kinase PCTAIRE-2)                                                                                                   | ATP binding [GO:0005524]; cyclin-dependent protein serine/threonine kinase activity [GO:0004693]; protein kinase activity [GO:0004672]                                                                                                                                        |
| [121] | Q92772 | Cyclin-dependent kinase-like 2 (EC 2.7.11.22) (Protein kinase p56 KKIAMRE) (Serine/threonine-protein kinase KKIAMRE)                                                                                                                                       | ATP binding [GO:0005524]; cyclin-dependent protein serine/threonine kinase activity [GO:0004693]; protein kinase activity                                                                                                                                                     |

|       |        |                                                                                                                                                                                                                                                                                                                                    |                                                                                                                                                                                                                                                                                                                                   |
|-------|--------|------------------------------------------------------------------------------------------------------------------------------------------------------------------------------------------------------------------------------------------------------------------------------------------------------------------------------------|-----------------------------------------------------------------------------------------------------------------------------------------------------------------------------------------------------------------------------------------------------------------------------------------------------------------------------------|
|       |        |                                                                                                                                                                                                                                                                                                                                    | [GO:0004672]                                                                                                                                                                                                                                                                                                                      |
| [122] | Q9UQ88 | Cyclin-dependent kinase 11A (EC 2.7.11.22) (Cell division cycle 2-like protein kinase 2) (Cell division protein kinase 11A) (Galactosyltransferase-associated protein kinase p58/GTA) (PITSLRE serine/threonine-protein kinase CDC2L2)                                                                                             | ATP binding [GO:0005524]; cyclin-dependent protein serine/threonine kinase activity [GO:0004693]; protein kinase activity [GO:0004672]; protein serine/threonine kinase activity [GO:0004674]                                                                                                                                     |
| [123] | Q9UQ07 | MAPK/MAK/MRK overlapping kinase (EC 2.7.11.22) (MOK protein kinase) (Renal tumor antigen 1) (RAGE-1)                                                                                                                                                                                                                               | ATP binding [GO:0005524]; cyclin-dependent protein serine/threonine kinase activity [GO:0004693]; protein kinase activity [GO:0004672]; protein serine/threonine kinase activity [GO:0004674]                                                                                                                                     |
| [124] | P06493 | Cyclin-dependent kinase 1 (CDK1) (EC 2.7.11.22) (EC 2.7.11.23) (Cell division control protein 2 homolog) (Cell division protein kinase 1) (p34 protein kinase)                                                                                                                                                                     | ATP binding [GO:0005524]; cyclin-dependent protein serine/threonine kinase activity [GO:0004693]; protein kinase activity [GO:0004672]; protein serine/threonine kinase activity [GO:0004674]; RNA polymerase II carboxy-terminal domain kinase activity [GO:0008353]                                                             |
| [125] | P49336 | Cyclin-dependent kinase 8 (EC 2.7.11.22) (EC 2.7.11.23) (Cell division protein kinase 8) (Mediator complex subunit CDK8) (Mediator of RNA polymerase II transcription subunit CDK8) (Protein kinase K35)                                                                                                                           | ATP binding [GO:0005524]; cyclin-dependent protein serine/threonine kinase activity [GO:0004693]; protein kinase activity [GO:0004672]; RNA polymerase II carboxy-terminal domain kinase activity [GO:0008353]; ubiquitin protein ligase activity [GO:0061630]                                                                    |
| [126] | P20794 | Serine/threonine-protein kinase MAK (EC 2.7.11.22) (Male germ cell-associated kinase)                                                                                                                                                                                                                                              | ATP binding [GO:0005524]; cyclin-dependent protein serine/threonine kinase activity [GO:0004693]; protein kinase activity [GO:0004672]; transcription coactivator activity [GO:0003713]                                                                                                                                           |
| [127] | Q00536 | Cyclin-dependent kinase 16 (EC 2.7.11.22) (Cell division protein kinase 16) (PCTAIRE-motif protein kinase 1) (Serine/threonine-protein kinase PCTAIRE-1)                                                                                                                                                                           | ATP binding [GO:0005524]; cyclin-dependent protein serine/threonine kinase activity [GO:0004693]; protein serine/threonine kinase activity [GO:0004674]                                                                                                                                                                           |
| [128] | P45984 | Mitogen-activated protein kinase 9 (MAP kinase 9) (MAPK 9) (EC 2.7.11.24) (JNK-55) (Stress-activated protein kinase 1a) (SAPK1a) (Stress-activated protein kinase JNK2) (c-Jun N-terminal kinase 2)                                                                                                                                | ATP binding [GO:0005524]; cysteine-type endopeptidase activator activity involved in apoptotic process [GO:0008656]; JUN kinase activity [GO:0004705]; transcription factor binding [GO:0008134]                                                                                                                                  |
| [129] | P51812 | Ribosomal protein S6 kinase alpha-3 (S6K-alpha-3) (EC 2.7.11.1) (90 kDa ribosomal protein S6 kinase 3) (p90-RSK 3) (p90RSK3) (Insulin-stimulated protein kinase 1) (ISPK-1) (MAP kinase-activated protein kinase 1b) (MAPK-activated protein kinase 1b) (MAPKAP kinase 1b) (MAPKAPK-1b) (Ribosomal S6 kinase 2) (RSK-2) (pp90RSK2) | ATP binding [GO:0005524]; cysteine-type endopeptidase inhibitor activity involved in apoptotic process [GO:0043027]; magnesium ion binding [GO:0000287]; protein kinase activity [GO:0004672]; protein serine/threonine kinase activity [GO:0004674]; ribosomal protein S6 kinase activity [GO:0004711]                           |
| [130] | Q15418 | Ribosomal protein S6 kinase alpha-1 (S6K-alpha-1) (EC 2.7.11.1) (90 kDa ribosomal protein S6 kinase 1) (p90-RSK 1) (p90RSK1) (p90S6K) (MAP kinase-activated protein kinase 1a) (MAPK-activated protein kinase 1a) (MAPKAP kinase 1a) (MAPKAPK-1a) (Ribosomal S6 kinase 1) (RSK-1)                                                  | ATP binding [GO:0005524]; cysteine-type endopeptidase inhibitor activity involved in apoptotic process [GO:0043027]; magnesium ion binding [GO:0000287]; protein serine/threonine/tyrosine kinase activity [GO:0004712]; protein serine/threonine kinase activity [GO:0004674]; ribosomal protein S6 kinase activity [GO:0004711] |
| [131] | Q13546 | Receptor-interacting serine/threonine-protein kinase 1 (EC 2.7.11.1) (Cell death protein RIP) (Receptor-interacting protein 1) (RIP-1) (Serine/threonine-protein kinase RIP)                                                                                                                                                       | ATP binding [GO:0005524]; death domain binding [GO:0070513]; death receptor binding [GO:0005123]; identical protein binding [GO:0042802]; protein complex binding [GO:0032403]; protein kinase activity [GO:0004672]; protein serine/threonine kinase activity [GO:0004674]; ubiquitin protein ligase                             |

|       |        |                                                                                                                                                                                                                                                                                                                                           |                                                                                                                                                                                                                                                                                                                                                                  |
|-------|--------|-------------------------------------------------------------------------------------------------------------------------------------------------------------------------------------------------------------------------------------------------------------------------------------------------------------------------------------------|------------------------------------------------------------------------------------------------------------------------------------------------------------------------------------------------------------------------------------------------------------------------------------------------------------------------------------------------------------------|
|       |        |                                                                                                                                                                                                                                                                                                                                           | binding [GO:0031625]                                                                                                                                                                                                                                                                                                                                             |
| [132] | O15457 | MutS protein homolog 4 (hMSH4)                                                                                                                                                                                                                                                                                                            | ATP binding [GO:0005524]; DNA binding [GO:0003677]; DNA-dependent ATPase activity [GO:0008094]; mismatched DNA binding [GO:0030983]                                                                                                                                                                                                                              |
| [133] | P28482 | Mitogen-activated protein kinase 1 (MAP kinase 1) (MAPK 1) (EC 2.7.11.24) (ERT1) (Extracellular signal-regulated kinase 2) (ERK-2) (MAP kinase isoform p42) (p42-MAPK) (Mitogen-activated protein kinase 2) (MAP kinase 2) (MAPK 2)                                                                                                       | ATP binding [GO:0005524]; DNA binding [GO:0003677]; MAP kinase activity [GO:0004707]; phosphatase binding [GO:0019902]; protein serine/threonine kinase activity [GO:0004674]; RNA polymerase II carboxy-terminal domain kinase activity [GO:0008353]                                                                                                            |
| [134] | Q9NP58 | ATP-binding cassette sub-family B member 6, mitochondrial (Mitochondrial ABC transporter 3) (Mt-ABC transporter 3) (P-glycoprotein-related protein) (Ubiquitously-expressed mammalian ABC half transporter)                                                                                                                               | ATP binding [GO:0005524]; efflux transmembrane transporter activity [GO:0015562]; heme binding [GO:0020037]; heme transporter activity [GO:0015232]; heme-transporting ATPase activity [GO:0015439]                                                                                                                                                              |
| [135] | O14733 | Dual specificity mitogen-activated protein kinase kinase 7 (MAP kinase kinase 7) (MAPKK 7) (EC 2.7.12.2) (JNK-activating kinase 2) (MAPK/ERK kinase 7) (MEK 7) (Stress-activated protein kinase kinase 4) (SAPK kinase 4) (SAPKK-4) (SAPKK4) (c-Jun N-terminal kinase kinase 2) (JNK kinase 2) (JNKK 2)                                   | ATP binding [GO:0005524]; enzyme binding [GO:0019899]; JUN kinase kinase activity [GO:0008545]; magnesium ion binding [GO:0000287]; MAP kinase kinase activity [GO:0004708]; protein kinase binding [GO:0019901]; protein phosphatase binding [GO:0019903]; protein serine/threonine kinase activity [GO:0004674]; protein tyrosine kinase activity [GO:0004713] |
| [136] | Q16539 | Mitogen-activated protein kinase 14 (MAP kinase 14) (MAPK 14) (EC 2.7.11.24) (Cytokine suppressive anti-inflammatory drug-binding protein) (CSAID-binding protein) (CSBP) (MAP kinase MXI2) (MAX-interacting protein 2) (Mitogen-activated protein kinase p38 alpha) (MAP kinase p38 alpha) (Stress-activated protein kinase 2a) (SAPK2a) | ATP binding [GO:0005524]; enzyme binding [GO:0019899]; MAP kinase activity [GO:0004707]; MAP kinase kinase activity [GO:0004708]; NFAT protein binding [GO:0051525]; protein serine/threonine kinase activity [GO:0004674]                                                                                                                                       |
| [137] | Q15835 | Rhodopsin kinase (RK) (EC 2.7.11.14) (G protein-coupled receptor kinase 1)                                                                                                                                                                                                                                                                | ATP binding [GO:0005524]; G-protein coupled receptor kinase activity [GO:0004703]; protein kinase activity [GO:0004672]; rhodopsin kinase activity [GO:0050254]                                                                                                                                                                                                  |
| [138] | P32298 | G protein-coupled receptor kinase 4 (EC 2.7.11.16) (G protein-coupled receptor kinase GRK4) (ITI1)                                                                                                                                                                                                                                        | ATP binding [GO:0005524]; G-protein coupled receptor kinase activity [GO:0004703]; rhodopsin kinase activity [GO:0050254]                                                                                                                                                                                                                                        |
| [139] | Q8WTQ7 | G protein-coupled receptor kinase 7 (EC 2.7.11.14) (EC 2.7.11.16) (G protein-coupled receptor kinase GRK7)                                                                                                                                                                                                                                | ATP binding [GO:0005524]; G-protein coupled receptor kinase activity [GO:0004703]; rhodopsin kinase activity [GO:0050254]                                                                                                                                                                                                                                        |
| [140] | Q96L34 | MAP/microtubule affinity-regulating kinase 4 (EC 2.7.11.1) (MAP/microtubule affinity-regulating kinase-like 1)                                                                                                                                                                                                                            | ATP binding [GO:0005524]; gamma-tubulin binding [GO:0043015]; microtubule binding [GO:0008017]; protein serine/threonine kinase activity [GO:0004674]; tau-protein kinase activity [GO:0050321]; ubiquitin binding [GO:0043130]                                                                                                                                  |
| [141] | Q9UII7 | GTP:AMP phosphotransferase AK3, mitochondrial (EC 2.7.4.10) (Adenylate kinase 3) (AK 3) (Adenylate kinase 3 alpha-like 1)                                                                                                                                                                                                                 | ATP binding [GO:0005524]; GTP binding [GO:0005525]; nucleoside triphosphate adenylate kinase activity [GO:0046899]                                                                                                                                                                                                                                               |
| [142] | O60229 | Kalirin (EC 2.7.11.1) (Huntingtin-associated protein-interacting protein) (Protein Duo) (Serine/threonine-protein kinase with Dbp- and pleckstrin homology domain)                                                                                                                                                                        | ATP binding [GO:0005524]; guanyl-nucleotide exchange factor activity [GO:0005085]; metal ion binding [GO:0046872]; protein serine/threonine kinase activity [GO:0004674]; Rho guanyl-nucleotide exchange factor activity [GO:0005089]                                                                                                                            |
| [143] | O75962 | Triple functional domain protein (EC 2.7.11.1) (PTPRF-interacting protein)                                                                                                                                                                                                                                                                | ATP binding [GO:0005524]; guanyl-nucleotide exchange factor activity [GO:0005085]; protein serine/threonine kinase activity [GO:0004674]; Rho guanyl-nucleotide exchange factor activity [GO:0005089]                                                                                                                                                            |

|       |        |                                                                                                                                                                                                                                                                                                     |                                                                                                                                                                                                                                                                                                                                                                                                              |
|-------|--------|-----------------------------------------------------------------------------------------------------------------------------------------------------------------------------------------------------------------------------------------------------------------------------------------------------|--------------------------------------------------------------------------------------------------------------------------------------------------------------------------------------------------------------------------------------------------------------------------------------------------------------------------------------------------------------------------------------------------------------|
| [144] | O14936 | Peripheral plasma membrane protein CASK (hCASK) (EC 2.7.11.1) (Calcium/calmodulin-dependent serine protein kinase) (Protein lin-2 homolog)                                                                                                                                                          | ATP binding [GO:0005524]; guanylate kinase activity [GO:0004385]; protein serine/threonine kinase activity [GO:0004674]                                                                                                                                                                                                                                                                                      |
| [145] | Q16513 | Serine/threonine-protein kinase N2 (EC 2.7.11.13) (PKN gamma) (Protein kinase C-like 2) (Protein-kinase C-related kinase 2)                                                                                                                                                                         | ATP binding [GO:0005524]; histone deacetylase binding [GO:0042826]; kinase activity [GO:0016301]; poly(A) RNA binding [GO:0044822]; protein kinase activity [GO:0004672]; protein kinase C activity [GO:0004697]; protein serine/threonine kinase activity [GO:0004674]; RNA polymerase binding [GO:0070063]                                                                                                 |
| [146] | O75676 | Ribosomal protein S6 kinase alpha-4 (S6K-alpha-4) (EC 2.7.11.1) (90 kDa ribosomal protein S6 kinase 4) (Nuclear mitogen- and stress-activated protein kinase 2) (Ribosomal protein kinase B) (RSKB)                                                                                                 | ATP binding [GO:0005524]; histone kinase activity (H3-S10 specific) [GO:0035175]; magnesium ion binding [GO:0000287]; mitogen-activated protein kinase p38 binding [GO:0048273]; protein serine/threonine kinase activity [GO:0004674]; ribosomal protein S6 kinase activity [GO:0004711]                                                                                                                    |
| [147] | O14757 | Serine/threonine-protein kinase Chk1 (EC 2.7.11.1) (CHK1 checkpoint homolog) (Cell cycle checkpoint kinase) (Checkpoint kinase-1)                                                                                                                                                                   | ATP binding [GO:0005524]; histone kinase activity (H3-T11 specific) [GO:0035402]; protein kinase activity [GO:0004672]; protein serine/threonine kinase activity [GO:0004674]                                                                                                                                                                                                                                |
| [148] | O14965 | Aurora kinase A (EC 2.7.11.1) (Aurora 2) (Aurora/IPL1-related kinase 1) (ARK-1) (Aurora-related kinase 1) (hARK1) (Breast tumor-amplified kinase) (Serine/threonine-protein kinase 15) (Serine/threonine-protein kinase 6) (Serine/threonine-protein kinase aurora-A)                               | ATP binding [GO:0005524]; histone serine kinase activity [GO:0035174]; protein kinase activity [GO:0004672]; protein kinase binding [GO:0019901]; protein serine/threonine/tyrosine kinase activity [GO:0004712]; protein serine/threonine kinase activity [GO:0004674]                                                                                                                                      |
| [149] | Q9UQB9 | Aurora kinase C (EC 2.7.11.1) (Aurora 3) (Aurora/IPL1-related kinase 3) (ARK-3) (Aurora-related kinase 3) (Aurora/IPL1/Eg2 protein 2) (Serine/threonine-protein kinase 13) (Serine/threonine-protein kinase aurora-C)                                                                               | ATP binding [GO:0005524]; histone serine kinase activity [GO:0035174]; protein kinase activity [GO:0004672]; protein serine/threonine/tyrosine kinase activity [GO:0004712]                                                                                                                                                                                                                                  |
| [150] | P68400 | Casein kinase II subunit alpha (CK II alpha) (EC 2.7.11.1)                                                                                                                                                                                                                                          | ATP binding [GO:0005524]; Hsp90 protein binding [GO:0051879]; protein N-terminus binding [GO:0047485]; protein serine/threonine kinase activity [GO:0004674]                                                                                                                                                                                                                                                 |
| [151] | Q13043 | Serine/threonine-protein kinase 4 (EC 2.7.11.1) (Mammalian STE20-like protein kinase 1) (MST-1) (STE20-like kinase MST1) (Serine/threonine-protein kinase Krs-2) [Cleaved into: Serine/threonine-protein kinase 4 37kDa subunit (MST1/N); Serine/threonine-protein kinase 4 18kDa subunit (MST1/C)] | ATP binding [GO:0005524]; identical protein binding [GO:0042802]; magnesium ion binding [GO:0000287]; MAP kinase kinase activity [GO:0004709]; protein dimerization activity [GO:0046983]; protein homodimerization activity [GO:0042803]; protein serine/threonine kinase activator activity [GO:0043539]; protein serine/threonine kinase activity [GO:0004674]; transcription factor binding [GO:0008134] |
| [152] | Q9P289 | Serine/threonine-protein kinase 26 (EC 2.7.11.1) (MST3 and SOK1-related kinase) (Mammalian STE20-like protein kinase 4) (MST-4) (STE20-like kinase MST4) (Serine/threonine-protein kinase MASK)                                                                                                     | ATP binding [GO:0005524]; identical protein binding [GO:0042802]; magnesium ion binding [GO:0000287]; protein homodimerization activity [GO:0042803]; protein kinase activity [GO:0004672]; protein serine/threonine kinase activity [GO:0004674]                                                                                                                                                            |
| [153] | Q5VT25 | Serine/threonine-protein kinase MRCK alpha (EC 2.7.11.1) (CDC42-binding protein kinase alpha) (DMPK-like alpha) (Myotonic dystrophy kinase-related CDC42-binding kinase alpha) (MRCK alpha) (Myotonic dystrophy protein kinase-like alpha)                                                          | ATP binding [GO:0005524]; identical protein binding [GO:0042802]; magnesium ion binding [GO:0000287]; protein serine/threonine kinase activity [GO:0004674]                                                                                                                                                                                                                                                  |
| [154] | P04049 | RAF proto-oncogene serine/threonine-protein kinase (EC 2.7.11.1) (Proto-oncogene c-RAF) (cRaf) (Raf-1)                                                                                                                                                                                              | ATP binding [GO:0005524]; identical protein binding [GO:0042802]; MAP kinase kinase kinase activity [GO:0004709]; metal ion binding                                                                                                                                                                                                                                                                          |

|       |        |                                                                                                                                                                                                                                                                                                                         |                                                                                                                                                                                                                                                                                                                                           |
|-------|--------|-------------------------------------------------------------------------------------------------------------------------------------------------------------------------------------------------------------------------------------------------------------------------------------------------------------------------|-------------------------------------------------------------------------------------------------------------------------------------------------------------------------------------------------------------------------------------------------------------------------------------------------------------------------------------------|
|       |        |                                                                                                                                                                                                                                                                                                                         | [GO:0046872]; protein kinase activity<br>[GO:0004672]; protein serine/threonine kinase activity [GO:0004674]                                                                                                                                                                                                                              |
| [155] | O96017 | Serine/threonine-protein kinase Chk2 (EC 2.7.11.1) (CHK2 checkpoint homolog) (Cds1 homolog) (Hucds1) (hCds1) (Checkpoint kinase 2)                                                                                                                                                                                      | ATP binding [GO:0005524]; identical protein binding [GO:0042802]; metal ion binding [GO:0046872]; protein homodimerization activity [GO:0042803]; protein kinase binding [GO:0019901]; protein serine/threonine kinase activity [GO:0004674]; ubiquitin protein ligase binding [GO:0031625]                                               |
| [156] | Q15139 | Serine/threonine-protein kinase D1 (EC 2.7.11.13) (Protein kinase C mu type) (Protein kinase D) (nPKC-D1) (nPKC-mu)                                                                                                                                                                                                     | ATP binding [GO:0005524]; identical protein binding [GO:0042802]; metal ion binding [GO:0046872]; protein kinase C activity [GO:0004697]; protein serine/threonine kinase activity [GO:0004674]                                                                                                                                           |
| [157] | Q9Y572 | Receptor-interacting serine/threonine-protein kinase 3 (EC 2.7.11.1) (RIP-like protein kinase 3) (Receptor-interacting protein 3) (RIP-3)                                                                                                                                                                               | ATP binding [GO:0005524]; identical protein binding [GO:0042802]; NF-kappaB-inducing kinase activity [GO:0004704]; protein complex binding [GO:0032403]; protein kinase activity [GO:0004672]; protein serine/threonine kinase activity [GO:0004674]; transcription coactivator activity [GO:0003713]                                     |
| [158] | O94804 | Serine/threonine-protein kinase 10 (EC 2.7.11.1) (Lymphocyte-oriented kinase)                                                                                                                                                                                                                                           | ATP binding [GO:0005524]; identical protein binding [GO:0042802]; polo kinase kinase activity [GO:0042801]; protein homodimerization activity [GO:0042803]; protein serine/threonine kinase activity [GO:0004674]                                                                                                                         |
| [159] | Q13177 | Serine/threonine-protein kinase PAK 2 (EC 2.7.11.1) (Gamma-PAK) (PAK65) (S6/H4 kinase) (p21-activated kinase 2) (PAK-2) (p58) [Cleaved into: PAK-2p27 (p27); PAK-2p34 (p34) (C-t-PAK2)]                                                                                                                                 | ATP binding [GO:0005524]; identical protein binding [GO:0042802]; protein kinase activity [GO:0004672]; protein kinase binding [GO:0019901]; protein serine/threonine kinase activity [GO:0004674]; protein tyrosine kinase activator activity [GO:0030296]; Rac GTPase binding [GO:0048365]                                              |
| [160] | O14920 | Inhibitor of nuclear factor kappa-B kinase subunit beta (I-kappa-B-kinase beta) (IKK-B) (IKK-beta) (IkbKB) (EC 2.7.11.10) (I-kappa-B kinase 2) (IKK2) (Nuclear factor NF-kappa-B inhibitor kinase beta) (NFKBIB)                                                                                                        | ATP binding [GO:0005524]; IkappaB kinase activity [GO:0008384]; protein heterodimerization activity [GO:0046982]; protein homodimerization activity [GO:0042803]; protein kinase activity [GO:0004672]; protein kinase binding [GO:0019901]; protein serine/threonine kinase activity [GO:0004674]; scaffold protein binding [GO:0097110] |
| [161] | O15111 | Inhibitor of nuclear factor kappa-B kinase subunit alpha (I-kappa-B kinase alpha) (IKK-A) (IKK-alpha) (IkbKA) (IkappaB kinase) (EC 2.7.11.10) (Conserved helix-loop-helix ubiquitous kinase) (I-kappa-B kinase 1) (IKK1) (Nuclear factor NF-kappa-B inhibitor kinase alpha) (NFKBIK) (Transcription factor 16) (TCF-16) | ATP binding [GO:0005524]; IkappaB kinase activity [GO:0008384]; protein heterodimerization activity [GO:0046982]; protein homodimerization activity [GO:0042803]; protein kinase activity [GO:0004672]; scaffold protein binding [GO:0097110]                                                                                             |
| [162] | Q9H8X2 | Inositol-pentakisphosphate 2-kinase (EC 2.7.1.158) (IPK1 homolog) (Inositol-1,3,4,5,6-pentakisphosphate 2-kinase) (Ins(1,3,4,5,6)P5 2-kinase) (InsP5 2-kinase)                                                                                                                                                          | ATP binding [GO:0005524]; inositol pentakisphosphate 2-kinase activity [GO:0035299]                                                                                                                                                                                                                                                       |
| [163] | Q05513 | Protein kinase C zeta type (EC 2.7.11.13) (nPKC-zeta)                                                                                                                                                                                                                                                                   | ATP binding [GO:0005524]; insulin receptor substrate binding [GO:0043560]; metal ion binding [GO:0046872]; potassium channel regulator activity [GO:0015459]; protein kinase activity [GO:0004672]; protein kinase C activity [GO:0004697]; protein serine/threonine kinase activity [GO:0004674]                                         |
| [164] | P45985 | Dual specificity mitogen-activated protein kinase kinase 4 (MAP kinase kinase 4) (MAPKK 4) (EC                                                                                                                                                                                                                          | ATP binding [GO:0005524]; JUN kinase kinase activity [GO:0008545]; protein kinase activity                                                                                                                                                                                                                                                |

|       |        |                                                                                                                                                                                                                                        |                                                                                                                                                                                                                                                                                                                        |
|-------|--------|----------------------------------------------------------------------------------------------------------------------------------------------------------------------------------------------------------------------------------------|------------------------------------------------------------------------------------------------------------------------------------------------------------------------------------------------------------------------------------------------------------------------------------------------------------------------|
|       |        | 2.7.12.2) (JNK-activating kinase 1) (MAPK/ERK kinase 4) (MEK 4) (SAPK/ERK kinase 1) (SEK1) (Stress-activated protein kinase kinase 1) (SAPK kinase 1) (SAPKK-1) (SAPKK1) (c-Jun N-terminal kinase kinase 1) (JNKK)                     | [GO:0004672]; protein serine/threonine kinase activity [GO:0004674]; protein tyrosine kinase activity [GO:0004713]                                                                                                                                                                                                     |
| [165] | Q13233 | Mitogen-activated protein kinase kinase kinase 1 (EC 2.7.11.25) (MAPK/ERK kinase kinase 1) (MEK kinase 1) (MEKK 1)                                                                                                                     | ATP binding [GO:0005524]; JUN kinase kinase activity [GO:0004706]; MAP kinase kinase activity [GO:0004709]; protein kinase activity [GO:0004672]; protein kinase binding [GO:0019901]; zinc ion binding [GO:0008270]                                                                                                   |
| [166] | Q99640 | Membrane-associated tyrosine- and threonine-specific cdc2-inhibitory kinase (EC 2.7.11.1) (Myt1 kinase)                                                                                                                                | ATP binding [GO:0005524]; kinase activity [GO:0016301]; metal ion binding [GO:0046872]; protein kinase activity [GO:0004672]; protein serine/threonine kinase activity [GO:0004674]                                                                                                                                    |
| [167] | O94806 | Serine/threonine-protein kinase D3 (EC 2.7.11.13) (Protein kinase C nu type) (Protein kinase EPK2) (nPKC-nu)                                                                                                                           | ATP binding [GO:0005524]; kinase activity [GO:0016301]; metal ion binding [GO:0046872]; protein kinase C activity [GO:0004697]                                                                                                                                                                                         |
| [168] | Q96GX5 | Serine/threonine-protein kinase greatwall (GW) (GWL) (hGWL) (EC 2.7.11.1) (Microtubule-associated serine/threonine-protein kinase-like) (MAST-L)                                                                                       | ATP binding [GO:0005524]; kinase activity [GO:0016301]; protein phosphatase 2A binding [GO:0051721]; protein serine/threonine kinase activity [GO:0004674]                                                                                                                                                             |
| [169] | Q9HC98 | Serine/threonine-protein kinase Nek6 (EC 2.7.11.1) (Never in mitosis A-related kinase 6) (NimA-related protein kinase 6) (Protein kinase SID6-1512)                                                                                    | ATP binding [GO:0005524]; kinesin binding [GO:0019894]; magnesium ion binding [GO:0000287]; protein kinase binding [GO:0019901]; protein serine/threonine kinase activity [GO:0004674]; signal transducer activity [GO:0004871]                                                                                        |
| [170] | Q7KZI7 | Serine/threonine-protein kinase MARK2 (EC 2.7.11.1) (EC 2.7.11.26) (ELKL motif kinase 1) (EMK-1) (MAP/microtubule affinity-regulating kinase 2) (PAR1 homolog) (PAR1 homolog b) (Par-1b) (Par1b)                                       | ATP binding [GO:0005524]; lipid binding [GO:0008289]; magnesium ion binding [GO:0000287]; poly(A) RNA binding [GO:0044822]; protein kinase activator activity [GO:0030295]; protein serine/threonine kinase activity [GO:0004674]; tau-protein kinase activity [GO:0050321]                                            |
| [171] | Q92630 | Dual specificity tyrosine-phosphorylation-regulated kinase 2 (EC 2.7.12.1)                                                                                                                                                             | ATP binding [GO:0005524]; magnesium ion binding [GO:0000287]; manganese ion binding [GO:0030145]; protein serine/threonine/tyrosine kinase activity [GO:0004712]; protein serine/threonine kinase activity [GO:0004674]; protein tyrosine kinase activity [GO:0004713]; ubiquitin binding [GO:0043130]                 |
| [172] | Q9UBE8 | Serine/threonine-protein kinase NLK (EC 2.7.11.24) (Nemo-like kinase) (Protein LAK1)                                                                                                                                                   | ATP binding [GO:0005524]; magnesium ion binding [GO:0000287]; MAP kinase activity [GO:0004707]; protein kinase activity [GO:0004672]; protein serine/threonine kinase activity [GO:0004674]; SH2 domain binding [GO:0042169]; transcription factor binding [GO:0008134]; ubiquitin protein ligase binding [GO:0031625] |
| [173] | P53778 | Mitogen-activated protein kinase 12 (MAP kinase 12) (MAPK 12) (EC 2.7.11.24) (Extracellular signal-regulated kinase 6) (ERK-6) (Mitogen-activated protein kinase p38 gamma) (MAP kinase p38 gamma) (Stress-activated protein kinase 3) | ATP binding [GO:0005524]; magnesium ion binding [GO:0000287]; MAP kinase activity [GO:0004707]; protein serine/threonine kinase activity [GO:0004674]                                                                                                                                                                  |
| [174] | O43318 | Mitogen-activated protein kinase kinase kinase 7 (EC 2.7.11.25) (Transforming growth factor-beta-activated kinase 1) (TGF-beta-activated kinase 1)                                                                                     | ATP binding [GO:0005524]; magnesium ion binding [GO:0000287]; MAP kinase kinase activity [GO:0004708]; MAP kinase kinase kinase activity [GO:0004709]; protein kinase activity [GO:0004672]; protein serine/threonine kinase activity [GO:0004674]; scaffold protein binding [GO:0097110]                              |
| [175] | O95382 | Mitogen-activated protein kinase kinase kinase 6                                                                                                                                                                                       | ATP binding [GO:0005524]; magnesium ion                                                                                                                                                                                                                                                                                |

|       |        |                                                                                                                                                                                                                                                                                                     |                                                                                                                                                                                                                                                                                                                        |
|-------|--------|-----------------------------------------------------------------------------------------------------------------------------------------------------------------------------------------------------------------------------------------------------------------------------------------------------|------------------------------------------------------------------------------------------------------------------------------------------------------------------------------------------------------------------------------------------------------------------------------------------------------------------------|
|       |        | (EC 2.7.11.25) (Apoptosis signal-regulating kinase 2)                                                                                                                                                                                                                                               | binding [GO:0000287]; MAP kinase kinase kinase activity [GO:0004709]                                                                                                                                                                                                                                                   |
| [176] | Q13188 | Serine/threonine-protein kinase 3 (EC 2.7.11.1) (Mammalian STE20-like protein kinase 2) (MST-2) (STE20-like kinase MST2) (Serine/threonine-protein kinase Krs-1) [Cleaved into: Serine/threonine-protein kinase 3 36kDa subunit (MST2/N); Serine/threonine-protein kinase 3 20kDa subunit (MST2/C)] | ATP binding [GO:0005524]; magnesium ion binding [GO:0000287]; MAP kinase kinase kinase activity [GO:0004709]; protein dimerization activity [GO:0046983]; protein kinase activity [GO:0004672]; protein serine/threonine kinase activator activity [GO:0043539]; protein serine/threonine kinase activity [GO:0004674] |
| [177] | Q99683 | Mitogen-activated protein kinase kinase kinase 5 (EC 2.7.11.25) (Apoptosis signal-regulating kinase 1) (ASK-1) (MAPK/ERK kinase kinase 5) (MEK kinase 5) (MEKK 5)                                                                                                                                   | ATP binding [GO:0005524]; magnesium ion binding [GO:0000287]; MAP kinase kinase kinase activity [GO:0004709]; protein homodimerization activity [GO:0042803]; protein kinase activity [GO:0004672]; protein phosphatase binding [GO:0019903]                                                                           |
| [178] | Q6P0Q8 | Microtubule-associated serine/threonine-protein kinase 2 (EC 2.7.11.1)                                                                                                                                                                                                                              | ATP binding [GO:0005524]; magnesium ion binding [GO:0000287]; microtubule binding [GO:0008017]; phosphatase binding [GO:0019902]; protein serine/threonine kinase activity [GO:0004674]                                                                                                                                |
| [179] | Q15208 | Serine/threonine-protein kinase 38 (EC 2.7.11.1) (NDR1 protein kinase) (Nuclear Dbf2-related kinase 1)                                                                                                                                                                                              | ATP binding [GO:0005524]; magnesium ion binding [GO:0000287]; mitogen-activated protein kinase kinase kinase binding [GO:0031435]; protein serine/threonine kinase activity [GO:0004674]                                                                                                                               |
| [180] | P0C1S8 | Wee1-like protein kinase 2 (EC 2.7.10.2) (Wee1-like protein kinase 1B) (Wee1B kinase)                                                                                                                                                                                                               | ATP binding [GO:0005524]; magnesium ion binding [GO:0000287]; non-membrane spanning protein tyrosine kinase activity [GO:0004715]                                                                                                                                                                                      |
| [181] | Q15831 | Serine/threonine-protein kinase STK11 (EC 2.7.11.1) (Liver kinase B1) (LKB1) (hLKB1) (Renal carcinoma antigen NY-REN-19)                                                                                                                                                                            | ATP binding [GO:0005524]; magnesium ion binding [GO:0000287]; p53 binding [GO:0002039]; protein kinase activator activity [GO:0030295]; protein serine/threonine kinase activity [GO:0004674]                                                                                                                          |
| [182] | Q9NWZ3 | Interleukin-1 receptor-associated kinase 4 (IRAK-4) (EC 2.7.11.1) (Renal carcinoma antigen NY-REN-64)                                                                                                                                                                                               | ATP binding [GO:0005524]; magnesium ion binding [GO:0000287]; protein kinase activity [GO:0004672]; protein serine/threonine kinase activity [GO:0004674]                                                                                                                                                              |
| [183] | Q9Y5S2 | Serine/threonine-protein kinase MRCK beta (EC 2.7.11.1) (CDC42-binding protein kinase beta) (CDC42BP-beta) (DMPK-like beta) (Myotonic dystrophy kinase-related CDC42-binding kinase beta) (MRCK beta) (Myotonic dystrophy protein kinase-like beta)                                                 | ATP binding [GO:0005524]; magnesium ion binding [GO:0000287]; protein kinase activity [GO:0004672]; protein serine/threonine kinase activity [GO:0004674]                                                                                                                                                              |
| [184] | O43781 | Dual specificity tyrosine-phosphorylation-regulated kinase 3 (EC 2.7.12.1) (Regulatory erythroid kinase) (REDK)                                                                                                                                                                                     | ATP binding [GO:0005524]; magnesium ion binding [GO:0000287]; protein kinase activity [GO:0004672]; protein serine/threonine/tyrosine kinase activity [GO:0004712]; protein serine/threonine kinase activity [GO:0004674]; protein tyrosine kinase activity [GO:0004713]                                               |
| [185] | Q9UK32 | Ribosomal protein S6 kinase alpha-6 (S6K-alpha-6) (EC 2.7.11.1) (90 kDa ribosomal protein S6 kinase 6) (p90-RSK 6) (p90RSK6) (Ribosomal S6 kinase 4) (RSK-4) (pp90RSK4)                                                                                                                             | ATP binding [GO:0005524]; magnesium ion binding [GO:0000287]; protein kinase activity [GO:0004672]; ribosomal protein S6 kinase activity [GO:0004711]                                                                                                                                                                  |
| [186] | O95835 | Serine/threonine-protein kinase LATS1 (EC 2.7.11.1) (Large tumor suppressor homolog 1) (WARTS protein kinase) (h-warts)                                                                                                                                                                             | ATP binding [GO:0005524]; magnesium ion binding [GO:0000287]; protein kinase binding [GO:0019901]; protein serine/threonine kinase activity [GO:0004674]                                                                                                                                                               |
| [187] | O60307 | Microtubule-associated serine/threonine-protein kinase 3 (EC 2.7.11.1)                                                                                                                                                                                                                              | ATP binding [GO:0005524]; magnesium ion binding [GO:0000287]; protein serine/threonine kinase activity [GO:0004674]                                                                                                                                                                                                    |
| [188] | O15021 | Microtubule-associated serine/threonine-protein kinase 4 (EC 2.7.11.1)                                                                                                                                                                                                                              | ATP binding [GO:0005524]; magnesium ion binding [GO:0000287]; protein serine/threonine                                                                                                                                                                                                                                 |

|       |        |                                                                                                                                                                                                                                                                                                   |                                                                                                                                                                                                                                        |
|-------|--------|---------------------------------------------------------------------------------------------------------------------------------------------------------------------------------------------------------------------------------------------------------------------------------------------------|----------------------------------------------------------------------------------------------------------------------------------------------------------------------------------------------------------------------------------------|
|       |        |                                                                                                                                                                                                                                                                                                   | kinase activity [GO:0004674]                                                                                                                                                                                                           |
| [189] | Q9H093 | NUAK family SNF1-like kinase 2 (EC 2.7.11.1) (Omphalocele kinase 2) (SNF1/AMP kinase-related kinase) (SNARK)                                                                                                                                                                                      | ATP binding [GO:0005524]; magnesium ion binding [GO:0000287]; protein serine/threonine kinase activity [GO:0004674]                                                                                                                    |
| [190] | Q9Y2H1 | Serine/threonine-protein kinase 38-like (EC 2.7.11.1) (NDR2 protein kinase) (Nuclear Dbf2-related kinase 2)                                                                                                                                                                                       | ATP binding [GO:0005524]; magnesium ion binding [GO:0000287]; protein serine/threonine kinase activity [GO:0004674]                                                                                                                    |
| [191] | Q6DT37 | Serine/threonine-protein kinase MRCK gamma (EC 2.7.11.1) (CDC42-binding protein kinase gamma) (DMPK-like gamma) (Myotonic dystrophy kinase-related CDC42-binding kinase gamma) (MRCK gamma) (MRCKG) (Myotonic dystrophy protein kinase-like gamma) (Myotonic dystrophy protein kinase-like alpha) | ATP binding [GO:0005524]; magnesium ion binding [GO:0000287]; protein serine/threonine kinase activity [GO:0004674]                                                                                                                    |
| [192] | Q8IY84 | Serine/threonine-protein kinase NIM1 (EC 2.7.11.1) (NIM1 serine/threonine-protein kinase)                                                                                                                                                                                                         | ATP binding [GO:0005524]; magnesium ion binding [GO:0000287]; protein serine/threonine kinase activity [GO:0004674]                                                                                                                    |
| [193] | Q9H0K1 | Serine/threonine-protein kinase SIK2 (EC 2.7.11.1) (Qin-induced kinase) (Salt-inducible kinase 2) (SIK-2) (Serine/threonine-protein kinase SNF1-like kinase 2)                                                                                                                                    | ATP binding [GO:0005524]; magnesium ion binding [GO:0000287]; protein serine/threonine kinase activity [GO:0004674]                                                                                                                    |
| [194] | Q9Y2K2 | Serine/threonine-protein kinase SIK3 (EC 2.7.11.1) (Salt-inducible kinase 3) (SIK-3) (Serine/threonine-protein kinase QSK)                                                                                                                                                                        | ATP binding [GO:0005524]; magnesium ion binding [GO:0000287]; protein serine/threonine kinase activity [GO:0004674]                                                                                                                    |
| [195] | Q9BXA7 | Testis-specific serine/threonine-protein kinase 1 (TSK-1) (TSK1) (TSSK-1) (Testis-specific kinase 1) (EC 2.7.11.1) (Serine/threonine-protein kinase 22A)                                                                                                                                          | ATP binding [GO:0005524]; magnesium ion binding [GO:0000287]; protein serine/threonine kinase activity [GO:0004674]                                                                                                                    |
| [196] | Q96PF2 | Testis-specific serine/threonine-protein kinase 2 (TSK-2) (TSK2) (TSSK-2) (Testis-specific kinase 2) (EC 2.7.11.1) (DiGeorge syndrome protein G) (DGS-G) (Serine/threonine-protein kinase 22B)                                                                                                    | ATP binding [GO:0005524]; magnesium ion binding [GO:0000287]; protein serine/threonine kinase activity [GO:0004674]                                                                                                                    |
| [197] | Q96PN8 | Testis-specific serine/threonine-protein kinase 3 (TSK-3) (TSSK-3) (Testis-specific kinase 3) (EC 2.7.11.1) (Serine/threonine-protein kinase 22C)                                                                                                                                                 | ATP binding [GO:0005524]; magnesium ion binding [GO:0000287]; protein serine/threonine kinase activity [GO:0004674]                                                                                                                    |
| [198] | Q6SA08 | Testis-specific serine/threonine-protein kinase 4 (TSK-4) (TSSK-4) (Testis-specific kinase 4) (EC 2.7.11.1) (Serine/threonine-protein kinase 22E)                                                                                                                                                 | ATP binding [GO:0005524]; magnesium ion binding [GO:0000287]; protein serine/threonine kinase activity [GO:0004674]                                                                                                                    |
| [199] | O95747 | Serine/threonine-protein kinase OSR1 (EC 2.7.11.1) (Oxidative stress-responsive 1 protein)                                                                                                                                                                                                        | ATP binding [GO:0005524]; magnesium ion binding [GO:0000287]; protein serine/threonine kinase activity [GO:0004674]; receptor signaling protein serine/threonine kinase activity [GO:0004702]                                          |
| [200] | Q9NRP7 | Serine/threonine-protein kinase 36 (EC 2.7.11.1) (Fused homolog)                                                                                                                                                                                                                                  | ATP binding [GO:0005524]; magnesium ion binding [GO:0000287]; protein serine/threonine kinase activity [GO:0004674]; transcription factor binding [GO:0008134]                                                                         |
| [201] | Q15349 | Ribosomal protein S6 kinase alpha-2 (S6K-alpha-2) (EC 2.7.11.1) (90 kDa ribosomal protein S6 kinase 2) (p90-RSK 2) (p90RSK2) (MAP kinase-activated protein kinase 1c) (MAPK-activated protein kinase 1c) (MAPKAP kinase 1c) (MAPKAPK-1c) (Ribosomal S6 kinase 3) (RSK-3) (pp90RSK3)               | ATP binding [GO:0005524]; magnesium ion binding [GO:0000287]; protein serine/threonine/tyrosine kinase activity [GO:0004712]; protein serine/threonine kinase activity [GO:0004674]; ribosomal protein S6 kinase activity [GO:0004711] |
| [202] | P27361 | Mitogen-activated protein kinase 3 (MAP kinase 3) (MAPK 3) (EC 2.7.11.24) (ERT2) (Extracellular signal-regulated kinase 1) (ERK-1) (Insulin-stimulated MAP2 kinase) (MAP kinase isoform p44) (p44-MAPK) (Microtubule-associated protein 2 kinase) (p44-ERK1)                                      | ATP binding [GO:0005524]; MAP kinase activity [GO:0004707]; phosphatase binding [GO:0019902]                                                                                                                                           |
| [203] | Q15759 | Mitogen-activated protein kinase 11 (MAP kinase 11) (MAPK 11) (EC 2.7.11.24) (Mitogen-activated                                                                                                                                                                                                   | ATP binding [GO:0005524]; MAP kinase activity [GO:0004707]; protein serine/threonine kinase                                                                                                                                            |



|       |        |                                                                                                                                                                                      |                                                                                                                                                                                                                                                                                                                                                                                                                                                                                                         |
|-------|--------|--------------------------------------------------------------------------------------------------------------------------------------------------------------------------------------|---------------------------------------------------------------------------------------------------------------------------------------------------------------------------------------------------------------------------------------------------------------------------------------------------------------------------------------------------------------------------------------------------------------------------------------------------------------------------------------------------------|
|       |        | protein kinase p38 beta) (MAP kinase p38 beta) (p38b) (Stress-activated protein kinase 2b) (SAPK2b) (p38-2)                                                                          | activity [GO:0004674]                                                                                                                                                                                                                                                                                                                                                                                                                                                                                   |
| [204] | O15264 | Mitogen-activated protein kinase 13 (MAP kinase 13) (MAPK 13) (EC 2.7.11.24) (Mitogen-activated protein kinase p38 delta) (MAP kinase p38 delta) (Stress-activated protein kinase 4) | ATP binding [GO:0005524]; MAP kinase activity [GO:0004707]; protein serine/threonine kinase activity [GO:0004674]                                                                                                                                                                                                                                                                                                                                                                                       |
| [205] | Q9Y6R4 | Mitogen-activated protein kinase kinase kinase 4 (EC 2.7.11.25) (MAP three kinase 1) (MAPK/ERK kinase kinase 4) (MEK kinase 4) (MEKK 4)                                              | ATP binding [GO:0005524]; MAP kinase kinase activity [GO:0004708]; MAP kinase kinase kinase activity [GO:0004709]; metal ion binding [GO:0046872]                                                                                                                                                                                                                                                                                                                                                       |
| [206] | Q99759 | Mitogen-activated protein kinase kinase kinase 3 (EC 2.7.11.25) (MAPK/ERK kinase kinase 3) (MEK kinase 3) (MEKK 3)                                                                   | ATP binding [GO:0005524]; MAP kinase kinase activity [GO:0004708]; MAP kinase kinase kinase activity [GO:0004709]; metal ion binding [GO:0046872]; protein kinase activity [GO:0004672]                                                                                                                                                                                                                                                                                                                 |
| [207] | Q9Y2U5 | Mitogen-activated protein kinase kinase kinase 2 (EC 2.7.11.25) (MAPK/ERK kinase kinase 2) (MEK kinase 2) (MEKK 2)                                                                   | ATP binding [GO:0005524]; MAP kinase kinase activity [GO:0004708]; MAP kinase kinase kinase activity [GO:0004709]; metal ion binding [GO:0046872]; protein kinase activity [GO:0004672]; protein kinase binding [GO:0019901]; protein serine/threonine kinase activity [GO:0004674]                                                                                                                                                                                                                     |
| [208] | Q99558 | Mitogen-activated protein kinase kinase kinase 14 (EC 2.7.11.25) (NF-kappa-beta-inducing kinase) (HsNIK) (Serine/threonine-protein kinase NIK)                                       | ATP binding [GO:0005524]; MAP kinase kinase activity [GO:0004708]; MAP kinase kinase kinase activity [GO:0004709]; NF-kappaB-inducing kinase activity [GO:0004704]; protein kinase activity [GO:0004672]; protein serine/threonine kinase activity [GO:0004674]                                                                                                                                                                                                                                         |
| [209] | Q13163 | Dual specificity mitogen-activated protein kinase kinase 5 (MAP kinase kinase 5) (MAPKK 5) (EC 2.7.12.2) (MAPK/ERK kinase 5) (MEK 5)                                                 | ATP binding [GO:0005524]; MAP kinase kinase activity [GO:0004708]; metal ion binding [GO:0046872]; protein kinase activity [GO:0004672]; protein serine/threonine kinase activity [GO:0004674]; protein tyrosine kinase activity [GO:0004713]                                                                                                                                                                                                                                                           |
| [210] | O75914 | Serine/threonine-protein kinase PAK 3 (EC 2.7.11.1) (Beta-PAK) (Oligophrenin-3) (p21-activated kinase 3) (PAK-3)                                                                     | ATP binding [GO:0005524]; MAP kinase kinase activity [GO:0004708]; metal ion binding [GO:0046872]; protein serine/threonine kinase activity [GO:0004674]; Rac GTPase binding [GO:0048365]                                                                                                                                                                                                                                                                                                               |
| [211] | P36507 | Dual specificity mitogen-activated protein kinase kinase 2 (MAP kinase kinase 2) (MAPKK 2) (EC 2.7.12.2) (ERK activator kinase 2) (MAPK/ERK kinase 2) (MEK 2)                        | ATP binding [GO:0005524]; MAP kinase kinase activity [GO:0004708]; PDZ domain binding [GO:0030165]; protein serine/threonine/tyrosine kinase activity [GO:0004712]; protein serine/threonine kinase activator activity [GO:0043539]; protein serine/threonine kinase activity [GO:0004674]; protein tyrosine kinase activity [GO:0004713]; scaffold protein binding [GO:0097110]                                                                                                                        |
| [212] | Q02750 | Dual specificity mitogen-activated protein kinase kinase 1 (MAP kinase kinase 1) (MAPKK 1) (MKK1) (EC 2.7.12.2) (ERK activator kinase 1) (MAPK/ERK kinase 1) (MEK 1)                 | ATP binding [GO:0005524]; MAP kinase kinase activity [GO:0004708]; protein C-terminus binding [GO:0008022]; protein kinase activity [GO:0004672]; protein N-terminus binding [GO:0047485]; protein serine/threonine/tyrosine kinase activity [GO:0004712]; protein serine/threonine kinase activator activity [GO:0043539]; protein serine/threonine kinase activity [GO:0004674]; protein tyrosine kinase activity [GO:0004713]; receptor signaling protein tyrosine phosphatase activity [GO:0004728] |
| [213] | P46734 | Dual specificity mitogen-activated protein kinase kinase 3 (MAP kinase kinase 3) (MAPKK 3) (EC                                                                                       | ATP binding [GO:0005524]; MAP kinase kinase activity [GO:0004708]; protein kinase binding                                                                                                                                                                                                                                                                                                                                                                                                               |

|       |        |                                                                                                                                                                                                                                                                                                                                                                                                                                                                           |                                                                                                                                                                                                                                                                                                    |
|-------|--------|---------------------------------------------------------------------------------------------------------------------------------------------------------------------------------------------------------------------------------------------------------------------------------------------------------------------------------------------------------------------------------------------------------------------------------------------------------------------------|----------------------------------------------------------------------------------------------------------------------------------------------------------------------------------------------------------------------------------------------------------------------------------------------------|
|       |        | 2.7.12.2) (MAPK/ERK kinase 3) (MEK 3) (Stress-activated protein kinase kinase 2) (SAPK kinase 2) (SAPKK-2) (SAPKK2)                                                                                                                                                                                                                                                                                                                                                       | [GO:0019901]; protein serine/threonine kinase activity [GO:0004674]; protein tyrosine kinase activity [GO:0004713]                                                                                                                                                                                 |
| [214] | P52564 | Dual specificity mitogen-activated protein kinase kinase 6 (MAP kinase kinase 6) (MAPKK 6) (EC 2.7.12.2) (MAPK/ERK kinase 6) (MEK 6) (Stress-activated protein kinase kinase 3) (SAPK kinase 3) (SAPKK-3) (SAPKK3)                                                                                                                                                                                                                                                        | ATP binding [GO:0005524]; MAP kinase kinase activity [GO:0004708]; protein kinase binding [GO:0019901]; protein serine/threonine kinase activity [GO:0004674]; protein tyrosine kinase activity [GO:0004713]                                                                                       |
| [215] | Q56UN5 | Mitogen-activated protein kinase kinase kinase 19 (EC 2.7.11.1) (Regulated in COPD, protein kinase) (SPS1/STE20-related protein kinase YSK4)                                                                                                                                                                                                                                                                                                                              | ATP binding [GO:0005524]; MAP kinase kinase kinase activity [GO:0004709]                                                                                                                                                                                                                           |
| [216] | Q6ZN16 | Mitogen-activated protein kinase kinase kinase 15 (EC 2.7.11.25) (Apoptosis signal-regulating kinase 3) (MAPK/ERK kinase kinase 15) (MEK kinase 15) (MEKK 15)                                                                                                                                                                                                                                                                                                             | ATP binding [GO:0005524]; MAP kinase kinase kinase activity [GO:0004709]; metal ion binding [GO:0046872]                                                                                                                                                                                           |
| [217] | Q12851 | Mitogen-activated protein kinase kinase kinase kinase 2 (EC 2.7.11.1) (B lymphocyte serine/threonine-protein kinase) (Germinal center kinase) (GC kinase) (MAPK/ERK kinase kinase kinase 2) (MEK kinase kinase 2) (MEKKK 2) (Rab8-interacting protein)                                                                                                                                                                                                                    | ATP binding [GO:0005524]; MAP kinase kinase kinase kinase activity [GO:0008349]; mitogen-activated protein kinase kinase kinase binding [GO:0031435]; protein serine/threonine kinase activity [GO:0004674]                                                                                        |
| [218] | Q92918 | Mitogen-activated protein kinase kinase kinase kinase 1 (EC 2.7.11.1) (Hematopoietic progenitor kinase) (MAPK/ERK kinase kinase kinase 1) (MEK kinase kinase 1) (MEKKK 1)                                                                                                                                                                                                                                                                                                 | ATP binding [GO:0005524]; MAP kinase kinase kinase kinase activity [GO:0008349]; protein kinase activity [GO:0004672]; protein serine/threonine kinase activity [GO:0004674]                                                                                                                       |
| [219] | P22102 | Trifunctional purine biosynthetic protein adenosine-3 [Includes: Phosphoribosylamine--glycine ligase (EC 6.3.4.13) (Glycinamide ribonucleotide synthetase) (GARS) (Phosphoribosylglycinamide synthetase); Phosphoribosylformylglycinamide cyclo-ligase (EC 6.3.3.1) (AIR synthase) (AIRS) (Phosphoribosyl-aminoimidazole synthetase); Phosphoribosylglycinamide formyltransferase (EC 2.1.2.2) (5'-phosphoribosylglycinamide transformylase) (GAR transformylase) (GART)] | ATP binding [GO:0005524]; metal ion binding [GO:0046872]; methyltransferase activity [GO:0008168]; phosphoribosylamine-glycine ligase activity [GO:0004637]; phosphoribosylformylglycinamide cyclo-ligase activity [GO:0004641]; phosphoribosylglycinamide formyltransferase activity [GO:0004644] |
| [220] | Q09013 | Myotonin-protein kinase (MT-PK) (EC 2.7.11.1) (DM-kinase) (DMK) (DM1 protein kinase) (DMPK) (Myotonic dystrophy protein kinase)                                                                                                                                                                                                                                                                                                                                           | ATP binding [GO:0005524]; metal ion binding [GO:0046872]; myosin phosphatase regulator activity [GO:0017020]; protein serine/threonine kinase activity [GO:0004674]                                                                                                                                |
| [221] | O14578 | Citron Rho-interacting kinase (CRIK) (EC 2.7.11.1) (Serine/threonine-protein kinase 21)                                                                                                                                                                                                                                                                                                                                                                                   | ATP binding [GO:0005524]; metal ion binding [GO:0046872]; PDZ domain binding [GO:0030165]; protein serine/threonine kinase activity [GO:0004674]; scaffold protein binding [GO:0097110]                                                                                                            |
| [222] | P41743 | Protein kinase C iota type (EC 2.7.11.13) (Atypical protein kinase C-lambda/iota) (PRKC-lambda/iota) (aPKC-lambda/iota) (nPKC-iota)                                                                                                                                                                                                                                                                                                                                       | ATP binding [GO:0005524]; metal ion binding [GO:0046872]; phospholipid binding [GO:0005543]; protein kinase activity [GO:0004672]; protein kinase C activity [GO:0004697]; protein serine/threonine kinase activity [GO:0004674]                                                                   |
| [223] | O75116 | Rho-associated protein kinase 2 (EC 2.7.11.1) (Rho kinase 2) (Rho-associated, coiled-coil-containing protein kinase 2) (Rho-associated, coiled-coil-containing protein kinase II) (ROCK-II) (p164 ROCK-2)                                                                                                                                                                                                                                                                 | ATP binding [GO:0005524]; metal ion binding [GO:0046872]; poly(A) RNA binding [GO:0044822]; protein serine/threonine kinase activity [GO:0004674]; Rho-dependent protein serine/threonine kinase activity [GO:0072518]; structural molecule activity [GO:0005198]                                  |
| [224] | Q59H18 | Serine/threonine-protein kinase TNNI3K (EC 2.7.11.1) (Cardiac ankyrin repeat kinase) (Cardiac troponin I-interacting kinase) (TNNI3-interacting kinase)                                                                                                                                                                                                                                                                                                                   | ATP binding [GO:0005524]; metal ion binding [GO:0046872]; protein C-terminus binding [GO:0008022]; protein kinase activity [GO:0004672]; protein serine/threonine kinase activity [GO:0004674]; troponin I binding                                                                                 |

|       |        |                                                                                                                                                                                                                                                                                                                                                                        |                                                                                                                                                                                                              |
|-------|--------|------------------------------------------------------------------------------------------------------------------------------------------------------------------------------------------------------------------------------------------------------------------------------------------------------------------------------------------------------------------------|--------------------------------------------------------------------------------------------------------------------------------------------------------------------------------------------------------------|
|       |        |                                                                                                                                                                                                                                                                                                                                                                        | [GO:0031013]                                                                                                                                                                                                 |
| [225] | O00506 | Serine/threonine-protein kinase 25 (EC 2.7.11.1) (Ste20-like kinase) (Sterile 20/oxidant stress-response kinase 1) (SOK-1) (Ste20/oxidant stress response kinase 1)                                                                                                                                                                                                    | ATP binding [GO:0005524]; metal ion binding [GO:0046872]; protein homodimerization activity [GO:0042803]; protein kinase activity [GO:0004672]; protein serine/threonine kinase activity [GO:0004674]        |
| [226] | Q9BZL6 | Serine/threonine-protein kinase D2 (EC 2.7.11.13) (nPKC-D2)                                                                                                                                                                                                                                                                                                            | ATP binding [GO:0005524]; metal ion binding [GO:0046872]; protein kinase activity [GO:0004672]; protein kinase C activity [GO:0004697]; protein serine/threonine kinase activity [GO:0004674]                |
| [227] | P51955 | Serine/threonine-protein kinase Nek2 (EC 2.7.11.1) (HSPK 21) (Never in mitosis A-related kinase 2) (NimA-related protein kinase 2) (NimA-like protein kinase 1)                                                                                                                                                                                                        | ATP binding [GO:0005524]; metal ion binding [GO:0046872]; protein kinase activity [GO:0004672]; protein phosphatase binding [GO:0019903]; protein serine/threonine kinase activity [GO:0004674]              |
| [228] | Q13464 | Rho-associated protein kinase 1 (EC 2.7.11.1) (Renal carcinoma antigen NY-REN-35) (Rho-associated, coiled-coil-containing protein kinase 1) (Rho-associated, coiled-coil-containing protein kinase I) (ROCK-I) (p160 ROCK-1) (p160ROCK)                                                                                                                                | ATP binding [GO:0005524]; metal ion binding [GO:0046872]; protein kinase activity [GO:0004672]; protein serine/threonine kinase activity [GO:0004674]                                                        |
| [229] | Q9Y6E0 | Serine/threonine-protein kinase 24 (EC 2.7.11.1) (Mammalian STE20-like protein kinase 3) (MST-3) (STE20-like kinase MST3) [Cleaved into: Serine/threonine-protein kinase 24 36 kDa subunit (Mammalian STE20-like protein kinase 3 N-terminal) (MST3/N); Serine/threonine-protein kinase 24 12 kDa subunit (Mammalian STE20-like protein kinase 3 C-terminal) (MST3/C)] | ATP binding [GO:0005524]; metal ion binding [GO:0046872]; protein kinase activity [GO:0004672]; protein serine/threonine kinase activity [GO:0004674]                                                        |
| [230] | Q6ZWH5 | Serine/threonine-protein kinase Nek10 (EC 2.7.11.1) (Never in mitosis A-related kinase 10) (NimA-related protein kinase 10)                                                                                                                                                                                                                                            | ATP binding [GO:0005524]; metal ion binding [GO:0046872]; protein kinase activity [GO:0004672]; protein serine/threonine kinase activity [GO:0004674]                                                        |
| [231] | Q8TD19 | Serine/threonine-protein kinase Nek9 (EC 2.7.11.1) (Nercc1 kinase) (Never in mitosis A-related kinase 9) (NimA-related protein kinase 9) (NimA-related kinase 8) (Nek8)                                                                                                                                                                                                | ATP binding [GO:0005524]; metal ion binding [GO:0046872]; protein kinase binding [GO:0019901]; protein serine/threonine kinase activity [GO:0004674]                                                         |
| [232] | Q04759 | Protein kinase C theta type (EC 2.7.11.13) (nPKC-theta)                                                                                                                                                                                                                                                                                                                | ATP binding [GO:0005524]; metal ion binding [GO:0046872]; protein kinase C activity [GO:0004697]; protein serine/threonine kinase activity [GO:0004674]; ubiquitin-protein transferase activity [GO:0004842] |
| [233] | Q8WU08 | Serine/threonine-protein kinase 32A (EC 2.7.11.1) (Yet another novel kinase 1)                                                                                                                                                                                                                                                                                         | ATP binding [GO:0005524]; metal ion binding [GO:0046872]; protein serine/threonine kinase activity [GO:0004674]                                                                                              |
| [234] | Q9NY57 | Serine/threonine-protein kinase 32B (EC 2.7.11.1) (Yet another novel kinase 2)                                                                                                                                                                                                                                                                                         | ATP binding [GO:0005524]; metal ion binding [GO:0046872]; protein serine/threonine kinase activity [GO:0004674]                                                                                              |
| [235] | Q86UX6 | Serine/threonine-protein kinase 32C (EC 2.7.11.1) (PKE) (Yet another novel kinase 3)                                                                                                                                                                                                                                                                                   | ATP binding [GO:0005524]; metal ion binding [GO:0046872]; protein serine/threonine kinase activity [GO:0004674]                                                                                              |
| [236] | Q9NRM7 | Serine/threonine-protein kinase LATS2 (EC 2.7.11.1) (Kinase phosphorylated during mitosis protein) (Large tumor suppressor homolog 2) (Serine/threonine-protein kinase kpm) (Warts-like kinase)                                                                                                                                                                        | ATP binding [GO:0005524]; metal ion binding [GO:0046872]; protein serine/threonine kinase activity [GO:0004674]                                                                                              |
| [237] | Q8NG66 | Serine/threonine-protein kinase Nek11 (EC 2.7.11.1) (Never in mitosis A-related kinase 11) (NimA-related protein kinase 11)                                                                                                                                                                                                                                            | ATP binding [GO:0005524]; metal ion binding [GO:0046872]; protein serine/threonine kinase activity [GO:0004674]                                                                                              |
| [238] | P51956 | Serine/threonine-protein kinase Nek3 (EC 2.7.11.1) (HSPK 36) (Never in mitosis A-related kinase 3) (NimA-related protein kinase 3)                                                                                                                                                                                                                                     | ATP binding [GO:0005524]; metal ion binding [GO:0046872]; protein serine/threonine kinase activity [GO:0004674]                                                                                              |

|       |        |                                                                                                                                                                                                                                                                                                              |                                                                                                                                                                                                                                                                                                                                                                                    |
|-------|--------|--------------------------------------------------------------------------------------------------------------------------------------------------------------------------------------------------------------------------------------------------------------------------------------------------------------|------------------------------------------------------------------------------------------------------------------------------------------------------------------------------------------------------------------------------------------------------------------------------------------------------------------------------------------------------------------------------------|
| [239] | Q6P3R8 | Serine/threonine-protein kinase Nek5 (EC 2.7.11.1) (Never in mitosis A-related kinase 5) (NimA-related protein kinase 5)                                                                                                                                                                                     | ATP binding [GO:0005524]; metal ion binding [GO:0046872]; protein serine/threonine kinase activity [GO:0004674]                                                                                                                                                                                                                                                                    |
| [240] | Q8TDX7 | Serine/threonine-protein kinase Nek7 (EC 2.7.11.1) (Never in mitosis A-related kinase 7) (NimA-related protein kinase 7)                                                                                                                                                                                     | ATP binding [GO:0005524]; metal ion binding [GO:0046872]; protein serine/threonine kinase activity [GO:0004674]                                                                                                                                                                                                                                                                    |
| [241] | Q86SG6 | Serine/threonine-protein kinase Nek8 (EC 2.7.11.1) (Never in mitosis A-related kinase 8) (NimA-related protein kinase 8) (Nima-related protein kinase 12a)                                                                                                                                                   | ATP binding [GO:0005524]; metal ion binding [GO:0046872]; protein serine/threonine kinase activity [GO:0004674]                                                                                                                                                                                                                                                                    |
| [242] | Q15569 | Dual specificity testis-specific protein kinase 1 (EC 2.7.12.1) (Testicular protein kinase 1)                                                                                                                                                                                                                | ATP binding [GO:0005524]; metal ion binding [GO:0046872]; protein serine/threonine/tyrosine kinase activity [GO:0004712]; protein serine/threonine kinase activity [GO:0004674]; protein tyrosine kinase activity [GO:0004713]                                                                                                                                                     |
| [243] | Q9NR20 | Dual specificity tyrosine-phosphorylation-regulated kinase 4 (EC 2.7.12.1)                                                                                                                                                                                                                                   | ATP binding [GO:0005524]; metal ion binding [GO:0046872]; protein serine/threonine/tyrosine kinase activity [GO:0004712]; protein serine/threonine kinase activity [GO:0004674]; protein tyrosine kinase activity [GO:0004713]                                                                                                                                                     |
| [244] | Q8WXR4 | Myosin-IIIb (EC 2.7.11.1)                                                                                                                                                                                                                                                                                    | ATP binding [GO:0005524]; microfilament motor activity [GO:0000146]; protein serine/threonine kinase activity [GO:0004674]                                                                                                                                                                                                                                                         |
| [245] | Q13627 | Dual specificity tyrosine-phosphorylation-regulated kinase 1A (EC 2.7.12.1) (Dual specificity YAK1-related kinase) (HP86) (Protein kinase minibrain homolog) (MNBH) (hMNB)                                                                                                                                   | ATP binding [GO:0005524]; non-membrane spanning protein tyrosine kinase activity [GO:0004715]; protein kinase activity [GO:0004672]; protein self-association [GO:0043621]; protein serine/threonine/tyrosine kinase activity [GO:0004712]; protein serine/threonine kinase activity [GO:0004674]; protein tyrosine kinase activity [GO:0004713]; tau protein binding [GO:0048156] |
| [246] | Q9BSD7 | Cancer-related nucleoside-triphosphatase (NTPase) (EC 3.6.1.15) (Nucleoside triphosphate phosphohydrolase)                                                                                                                                                                                                   | ATP binding [GO:0005524]; nucleoside-triphosphatase activity [GO:0017111]; nucleotide phosphatase activity, acting on free nucleotides [GO:0098519]; poly(A) RNA binding [GO:0044822]                                                                                                                                                                                              |
| [247] | Q9NP78 | ATP-binding cassette sub-family B member 9 (ATP-binding cassette transporter 9) (ABC transporter 9 protein) (hABCB9) (TAP-like protein) (TAPL)                                                                                                                                                               | ATP binding [GO:0005524]; oligopeptide-transporting ATPase activity [GO:0015421]; peptide-transporting ATPase activity [GO:0015440]; protein homodimerization activity [GO:0042803]; substrate-specific transmembrane transporter activity [GO:0022891]                                                                                                                            |
| [248] | Q9H4B4 | Serine/threonine-protein kinase PLK3 (EC 2.7.11.21) (Cytokine-inducible serine/threonine-protein kinase) (FGF-inducible kinase) (Polo-like kinase 3) (PLK-3) (Proliferation-related kinase)                                                                                                                  | ATP binding [GO:0005524]; p53 binding [GO:0002039]; protein serine/threonine kinase activity [GO:0004674]                                                                                                                                                                                                                                                                          |
| [249] | Q9UBS0 | Ribosomal protein S6 kinase beta-2 (S6K-beta-2) (S6K2) (EC 2.7.11.1) (70 kDa ribosomal protein S6 kinase 2) (P70S6K2) (p70-S6K 2) (S6 kinase-related kinase) (SRK) (Serine/threonine-protein kinase 14B) (p70 ribosomal S6 kinase beta) (S6K-beta) (p70 S6 kinase beta) (p70 S6K-beta) (p70 S6KB) (p70-beta) | ATP binding [GO:0005524]; peptide binding [GO:0042277]; protein kinase activity [GO:0004672]; protein serine/threonine kinase activity [GO:0004674]; ribosomal protein S6 kinase activity [GO:0004711]                                                                                                                                                                             |
| [250] | P23443 | Ribosomal protein S6 kinase beta-1 (S6K-beta-1) (S6K1) (EC 2.7.11.1) (70 kDa ribosomal protein S6 kinase 1) (P70S6K1) (p70-S6K 1) (Ribosomal protein S6 kinase I) (Serine/threonine-protein kinase 14A) (p70 ribosomal S6 kinase alpha) (p70 S6 kinase alpha) (p70 S6K-alpha) (p70 S6KA)                     | ATP binding [GO:0005524]; peptide binding [GO:0042277]; protein kinase activity [GO:0004672]; protein serine/threonine/tyrosine kinase activity [GO:0004712]; ribosomal protein S6 kinase activity [GO:0004711]                                                                                                                                                                    |
| [251] | Q96S38 | Ribosomal protein S6 kinase delta-1 (S6K-delta-1) (EC 2.7.11.1) (52 kDa ribosomal protein S6                                                                                                                                                                                                                 | ATP binding [GO:0005524]; phosphatidylinositol binding [GO:0035091]; protein serine/threonine                                                                                                                                                                                                                                                                                      |

|       |        |                                                                                                                                                                                                                      |                                                                                                                                                                                                                                                                                                                                                                           |
|-------|--------|----------------------------------------------------------------------------------------------------------------------------------------------------------------------------------------------------------------------|---------------------------------------------------------------------------------------------------------------------------------------------------------------------------------------------------------------------------------------------------------------------------------------------------------------------------------------------------------------------------|
|       |        | kinase) (Ribosomal S6 kinase-like protein with two PSK domains 118 kDa protein) (SPHK1-binding protein)                                                                                                              | kinase activity [GO:0004674]                                                                                                                                                                                                                                                                                                                                              |
| [252] | P15735 | Phosphorylase b kinase gamma catalytic chain, liver/testis isoform (PHK-gamma-LT) (PHK-gamma-T) (EC 2.7.11.19) (PSK-C3) (Phosphorylase kinase subunit gamma-2)                                                       | ATP binding [GO:0005524]; phosphorylase kinase activity [GO:0004689]; protein serine/threonine kinase activity [GO:0004674]; tau-protein kinase activity [GO:0050321]                                                                                                                                                                                                     |
| [253] | Q16816 | Phosphorylase b kinase gamma catalytic chain, skeletal muscle/heart isoform (PHK-gamma-M) (EC 2.7.11.19) (Phosphorylase kinase subunit gamma-1) (Serine/threonine-protein kinase PHKG1) (EC 2.7.11.1) (EC 2.7.11.26) | ATP binding [GO:0005524]; phosphorylase kinase activity [GO:0004689]; tau-protein kinase activity [GO:0050321]                                                                                                                                                                                                                                                            |
| [254] | O75385 | Serine/threonine-protein kinase ULK1 (EC 2.7.11.1) (Autophagy-related protein 1 homolog) (ATG1) (hATG1) (Unc-51-like kinase 1)                                                                                       | ATP binding [GO:0005524]; protein complex binding [GO:0032403]; protein serine/threonine kinase activity [GO:0004674]; Rab GTPase binding [GO:0017137]                                                                                                                                                                                                                    |
| [255] | Q8NCB2 | CaM kinase-like vesicle-associated protein                                                                                                                                                                           | ATP binding [GO:0005524]; protein kinase activity [GO:0004672]                                                                                                                                                                                                                                                                                                            |
| [256] | Q6P5Z2 | Serine/threonine-protein kinase N3 (EC 2.7.11.13) (Protein kinase PKN-beta) (Protein-kinase C-related kinase 3)                                                                                                      | ATP binding [GO:0005524]; protein kinase activity [GO:0004672]; protein kinase C activity [GO:0004697]                                                                                                                                                                                                                                                                    |
| [257] | Q8N4C8 | Misshapen-like kinase 1 (EC 2.7.11.1) (GCK family kinase MiNK) (MAPK/ERK kinase kinase 6) (MEK kinase kinase 6) (MEKKK 6) (Misshapen/NIK-related kinase) (Mitogen-activated protein kinase kinase kinase kinase 6)   | ATP binding [GO:0005524]; protein kinase activity [GO:0004672]; protein serine/threonine kinase activity [GO:0004674]                                                                                                                                                                                                                                                     |
| [258] | Q9Y4K4 | Mitogen-activated protein kinase kinase kinase kinase 5 (EC 2.7.11.1) (Kinase homologous to SPS1/STE20) (KHS) (MAPK/ERK kinase kinase kinase 5) (MEK kinase kinase 5) (MEKKK 5)                                      | ATP binding [GO:0005524]; protein kinase activity [GO:0004672]; protein serine/threonine kinase activity [GO:0004674]                                                                                                                                                                                                                                                     |
| [259] | Q9Y243 | RAC-gamma serine/threonine-protein kinase (EC 2.7.11.1) (Protein kinase Akt-3) (Protein kinase B gamma) (PKB gamma) (RAC-PK-gamma) (STK-2)                                                                           | ATP binding [GO:0005524]; protein kinase activity [GO:0004672]; protein serine/threonine kinase activity [GO:0004674]                                                                                                                                                                                                                                                     |
| [260] | O94768 | Serine/threonine-protein kinase 17B (EC 2.7.11.1) (DAP kinase-related apoptosis-inducing protein kinase 2)                                                                                                           | ATP binding [GO:0005524]; protein kinase activity [GO:0004672]; protein serine/threonine kinase activity [GO:0004674]                                                                                                                                                                                                                                                     |
| [261] | O96013 | Serine/threonine-protein kinase PAK 4 (EC 2.7.11.1) (p21-activated kinase 4) (PAK-4)                                                                                                                                 | ATP binding [GO:0005524]; protein kinase activity [GO:0004672]; protein serine/threonine kinase activity [GO:0004674]; Rac GTPase binding [GO:0048365]                                                                                                                                                                                                                    |
| [262] | O15075 | Serine/threonine-protein kinase DCLK1 (EC 2.7.11.1) (Doublecortin domain-containing protein 3A) (Doublecortin-like and CAM kinase-like 1) (Doublecortin-like kinase 1)                                               | ATP binding [GO:0005524]; protein kinase activity [GO:0004672]; protein serine/threonine kinase activity [GO:0004674]; receptor signaling protein activity [GO:0005057]                                                                                                                                                                                                   |
| [263] | Q9H2X6 | Homeodomain-interacting protein kinase 2 (hHIPk2) (EC 2.7.11.1)                                                                                                                                                      | ATP binding [GO:0005524]; protein kinase activity [GO:0004672]; protein serine/threonine kinase activity [GO:0004674]; RNA polymerase II activating transcription factor binding [GO:0001102]; RNA polymerase II transcription coactivator activity [GO:0001105]; SMAD binding [GO:0046332]; transcription corepressor activity [GO:0003714]; virion binding [GO:0046790] |
| [264] | P19784 | Casein kinase II subunit alpha' (CK II alpha') (EC 2.7.11.1)                                                                                                                                                         | ATP binding [GO:0005524]; protein N-terminus binding [GO:0047485]; protein serine/threonine kinase activity [GO:0004674]                                                                                                                                                                                                                                                  |
| [265] | Q8NFD2 | Ankyrin repeat and protein kinase domain-containing protein 1 (EC 2.7.11.1) (Protein kinase PKK2) (Sugen kinase 288) (SgK288) (X-kinase)                                                                             | ATP binding [GO:0005524]; protein serine/threonine kinase activity [GO:0004674]                                                                                                                                                                                                                                                                                           |
| [266] | Q8NEV1 | Casein kinase II subunit alpha 3 (CK II alpha 3) (EC 2.7.11.1) (Casein kinase II alpha 1 polypeptide pseudogene)                                                                                                     | ATP binding [GO:0005524]; protein serine/threonine kinase activity [GO:0004674]                                                                                                                                                                                                                                                                                           |

|       |        |                                                                                                                                                                                                                                                     |                                                                                 |
|-------|--------|-----------------------------------------------------------------------------------------------------------------------------------------------------------------------------------------------------------------------------------------------------|---------------------------------------------------------------------------------|
| [267] | P57058 | Hormonally up-regulated neu tumor-associated kinase (EC 2.7.11.1) (B19) (Serine/threonine-protein kinase MAK-V)                                                                                                                                     | ATP binding [GO:0005524]; protein serine/threonine kinase activity [GO:0004674] |
| [268] | P27448 | MAP/microtubule affinity-regulating kinase 3 (EC 2.7.11.1) (C-TAK1) (cTAK1) (Cdc25C-associated protein kinase 1) (ELKL motif kinase 2) (EMK-2) (Protein kinase STK10) (Ser/Thr protein kinase PAR-1) (Par-1a) (Serine/threonine-protein kinase p78) | ATP binding [GO:0005524]; protein serine/threonine kinase activity [GO:0004674] |
| [269] | Q86YV6 | Myosin light chain kinase family member 4 (EC 2.7.11.1) (Sugen kinase 85) (SgK085)                                                                                                                                                                  | ATP binding [GO:0005524]; protein serine/threonine kinase activity [GO:0004674] |
| [270] | Q7Z2Y5 | Nik-related protein kinase (EC 2.7.11.1)                                                                                                                                                                                                            | ATP binding [GO:0005524]; protein serine/threonine kinase activity [GO:0004674] |
| [271] | Q6A1A2 | Putative 3-phosphoinositide-dependent protein kinase 2 (EC 2.7.11.1) (3-phosphoinositide-dependent protein kinase 2 pseudogene)                                                                                                                     | ATP binding [GO:0005524]; protein serine/threonine kinase activity [GO:0004674] |
| [272] | O43930 | Putative serine/threonine-protein kinase PRKY (EC 2.7.11.1)                                                                                                                                                                                         | ATP binding [GO:0005524]; protein serine/threonine kinase activity [GO:0004674] |
| [273] | P31751 | RAC-beta serine/threonine-protein kinase (EC 2.7.11.1) (Protein kinase Akt-2) (Protein kinase B beta) (PKB beta) (RAC-PK-beta)                                                                                                                      | ATP binding [GO:0005524]; protein serine/threonine kinase activity [GO:0004674] |
| [274] | P57078 | Receptor-interacting serine/threonine-protein kinase 4 (EC 2.7.11.1) (Ankyrin repeat domain-containing protein 3) (PKC-delta-interacting protein kinase)                                                                                            | ATP binding [GO:0005524]; protein serine/threonine kinase activity [GO:0004674] |
| [275] | Q9Y6S9 | Ribosomal protein S6 kinase-like 1 (EC 2.7.11.1)                                                                                                                                                                                                    | ATP binding [GO:0005524]; protein serine/threonine kinase activity [GO:0004674] |
| [276] | Q9UEE5 | Serine/threonine-protein kinase 17A (EC 2.7.11.1) (DAP kinase-related apoptosis-inducing protein kinase 1)                                                                                                                                          | ATP binding [GO:0005524]; protein serine/threonine kinase activity [GO:0004674] |
| [277] | Q9BYT3 | Serine/threonine-protein kinase 33 (EC 2.7.11.1)                                                                                                                                                                                                    | ATP binding [GO:0005524]; protein serine/threonine kinase activity [GO:0004674] |
| [278] | Q8N568 | Serine/threonine-protein kinase DCLK2 (EC 2.7.11.1) (CaMK-like CREB regulatory kinase 2) (CL2) (CLICK-II) (CLICK2) (Doublecortin domain-containing protein 3B) (Doublecortin-like and CAM kinase-like 2) (Doublecortin-like kinase 2)               | ATP binding [GO:0005524]; protein serine/threonine kinase activity [GO:0004674] |
| [279] | Q9C098 | Serine/threonine-protein kinase DCLK3 (EC 2.7.11.1) (Doublecortin domain-containing protein 3C) (Doublecortin-like and CAM kinase-like 3) (Doublecortin-like kinase 3)                                                                              | ATP binding [GO:0005524]; protein serine/threonine kinase activity [GO:0004674] |
| [280] | P11801 | Serine/threonine-protein kinase H1 (EC 2.7.11.1) (Protein serine kinase H1) (PSK-H1)                                                                                                                                                                | ATP binding [GO:0005524]; protein serine/threonine kinase activity [GO:0004674] |
| [281] | Q96QS6 | Serine/threonine-protein kinase H2 (EC 2.7.11.1) (Protein serine kinase H2) (PSK-H2)                                                                                                                                                                | ATP binding [GO:0005524]; protein serine/threonine kinase activity [GO:0004674] |
| [282] | Q9P1W9 | Serine/threonine-protein kinase pim-2 (EC 2.7.11.1) (Pim-2h)                                                                                                                                                                                        | ATP binding [GO:0005524]; protein serine/threonine kinase activity [GO:0004674] |
| [283] | Q86V86 | Serine/threonine-protein kinase pim-3 (EC 2.7.11.1)                                                                                                                                                                                                 | ATP binding [GO:0005524]; protein serine/threonine kinase activity [GO:0004674] |
| [284] | O00444 | Serine/threonine-protein kinase PLK4 (EC 2.7.11.21) (Polo-like kinase 4) (PLK-4) (Serine/threonine-protein kinase 18) (Serine/threonine-protein kinase Sak)                                                                                         | ATP binding [GO:0005524]; protein serine/threonine kinase activity [GO:0004674] |
| [285] | Q52WX2 | Serine/threonine-protein kinase SBK1 (EC 2.7.11.1) (SH3-binding kinase 1)                                                                                                                                                                           | ATP binding [GO:0005524]; protein serine/threonine kinase activity [GO:0004674] |
| [286] | Q9UKI8 | Serine/threonine-protein kinase tousled-like 1 (EC 2.7.11.1) (PKU-beta) (Tousled-like kinase 1)                                                                                                                                                     | ATP binding [GO:0005524]; protein serine/threonine kinase activity [GO:0004674] |
| [287] | Q86UE8 | Serine/threonine-protein kinase tousled-like 2 (EC 2.7.11.1) (HsHPK) (PKU-alpha) (Tousled-like kinase 2)                                                                                                                                            | ATP binding [GO:0005524]; protein serine/threonine kinase activity [GO:0004674] |
| [288] | Q6PHR2 | Serine/threonine-protein kinase ULK3 (EC                                                                                                                                                                                                            | ATP binding [GO:0005524]; protein                                               |

|       |        |                                                                                                                                                                                             |                                                                                                                                                                                                                                                |
|-------|--------|---------------------------------------------------------------------------------------------------------------------------------------------------------------------------------------------|------------------------------------------------------------------------------------------------------------------------------------------------------------------------------------------------------------------------------------------------|
|       |        | 2.7.11.1) (Unc-51-like kinase 3)                                                                                                                                                            | serine/threonine kinase activity [GO:0004674]                                                                                                                                                                                                  |
| [289] | Q9Y3S1 | Serine/threonine-protein kinase WNK2 (EC 2.7.11.1) (Antigen NY-CO-43) (Protein kinase lysine-deficient 2) (Protein kinase with no lysine 2) (Serologically defined colon cancer antigen 43) | ATP binding [GO:0005524]; protein serine/threonine kinase activity [GO:0004674]                                                                                                                                                                |
| [290] | Q15772 | Striated muscle preferentially expressed protein kinase (EC 2.7.11.1) (Aortic preferentially expressed protein 1) (APEG-1)                                                                  | ATP binding [GO:0005524]; protein serine/threonine kinase activity [GO:0004674]                                                                                                                                                                |
| [291] | Q86TW2 | Uncharacterized aarF domain-containing protein kinase 1 (EC 2.7.11.-)                                                                                                                       | ATP binding [GO:0005524]; protein serine/threonine kinase activity [GO:0004674]                                                                                                                                                                |
| [292] | Q7Z695 | Uncharacterized aarF domain-containing protein kinase 2 (EC 2.7.11.-)                                                                                                                       | ATP binding [GO:0005524]; protein serine/threonine kinase activity [GO:0004674]                                                                                                                                                                |
| [293] | Q96LW2 | Uncharacterized serine/threonine-protein kinase SgK494 (EC 2.7.11.1) (Sugen kinase 494)                                                                                                     | ATP binding [GO:0005524]; protein serine/threonine kinase activity [GO:0004674]                                                                                                                                                                |
| [294] | Q9P286 | Serine/threonine-protein kinase PAK 7 (EC 2.7.11.1) (p21-activated kinase 5) (PAK-5) (p21-activated kinase 7) (PAK-7)                                                                       | ATP binding [GO:0005524]; protein serine/threonine kinase activity [GO:0004674]; Rac GTPase binding [GO:0048365]                                                                                                                               |
| [295] | Q9NYY3 | Serine/threonine-protein kinase PLK2 (EC 2.7.11.21) (Polo-like kinase 2) (PLK-2) (hPlk2) (Serine/threonine-protein kinase SNK) (hSNK) (Serum-inducible kinase)                              | ATP binding [GO:0005524]; protein serine/threonine kinase activity [GO:0004674]; signal transducer activity [GO:0004871]                                                                                                                       |
| [296] | Q17RB8 | LON peptidase N-terminal domain and RING finger protein 1 (RING finger protein 191)                                                                                                         | ATP-dependent peptidase activity [GO:0004176]; zinc ion binding [GO:0008270]                                                                                                                                                                   |
| [297] | Q9NUQ8 | ATP-binding cassette sub-family F member 3                                                                                                                                                  | ATPase activity [GO:0016887]; ATP binding [GO:0005524]                                                                                                                                                                                         |
| [298] | Q9NTK5 | Obg-like ATPase 1 (DNA damage-regulated overexpressed in cancer 45) (DOC45) (GTP-binding protein 9)                                                                                         | ATPase activity [GO:0016887]; ATP binding [GO:0005524]; GTP binding [GO:0005525]; metal ion binding [GO:0046872]; ribosomal large subunit binding [GO:0043023]; ribosome binding [GO:0043022]                                                  |
| [299] | Q9UG63 | ATP-binding cassette sub-family F member 2 (Iron-inhibited ABC transporter 2)                                                                                                               | ATPase activity [GO:0016887]; ATP binding [GO:0005524]; transporter activity [GO:0005215]                                                                                                                                                      |
| [300] | P28288 | ATP-binding cassette sub-family D member 3 (70 kDa peroxisomal membrane protein) (PMP70)                                                                                                    | ATPase activity [GO:0016887]; ATPase activity, coupled to transmembrane movement of substances [GO:0042626]; ATP binding [GO:0005524]; long-chain fatty acid transporter activity [GO:0005324]; protein homodimerization activity [GO:0042803] |
| [301] | Q9BZC7 | ATP-binding cassette sub-family A member 2 (ATP-binding cassette transporter 2) (ATP-binding cassette 2)                                                                                    | ATPase activity [GO:0016887]; ATPase activity, coupled to transmembrane movement of substances [GO:0042626]; ATP binding [GO:0005524]; nucleotide binding [GO:0000166]                                                                         |
| [302] | P33527 | Multidrug resistance-associated protein 1 (ATP-binding cassette sub-family C member 1) (Leukotriene C(4) transporter) (LTC4 transporter)                                                    | ATPase activity [GO:0016887]; ATPase activity, coupled to transmembrane movement of substances [GO:0042626]; ATP binding [GO:0005524]; transporter activity [GO:0005215]                                                                       |
| [303] | Q8WWZ4 | ATP-binding cassette sub-family A member 10                                                                                                                                                 | ATPase activity, coupled to transmembrane movement of substances [GO:0042626]; ATP binding [GO:0005524]                                                                                                                                        |
| [304] | Q8WWZ7 | ATP-binding cassette sub-family A member 5                                                                                                                                                  | ATPase activity, coupled to transmembrane movement of substances [GO:0042626]; ATP binding [GO:0005524]                                                                                                                                        |
| [305] | Q8N139 | ATP-binding cassette sub-family A member 6                                                                                                                                                  | ATPase activity, coupled to transmembrane movement of substances [GO:0042626]; ATP binding [GO:0005524]                                                                                                                                        |
| [306] | O94911 | ATP-binding cassette sub-family A member 8                                                                                                                                                  | ATPase activity, coupled to transmembrane movement of substances [GO:0042626]; ATP binding [GO:0005524]                                                                                                                                        |
| [307] | Q8IUA7 | ATP-binding cassette sub-family A member 9                                                                                                                                                  | ATPase activity, coupled to transmembrane movement of substances [GO:0042626]; ATP binding [GO:0005524]                                                                                                                                        |

|       |        |                                                                                                                                                                                           |                                                                                                                                                                                                                                                                                                                       |
|-------|--------|-------------------------------------------------------------------------------------------------------------------------------------------------------------------------------------------|-----------------------------------------------------------------------------------------------------------------------------------------------------------------------------------------------------------------------------------------------------------------------------------------------------------------------|
| [308] | Q96J65 | Multidrug resistance-associated protein 9 (ATP-binding cassette sub-family C member 12)                                                                                                   | ATPase activity, coupled to transmembrane movement of substances [GO:0042626]; ATP binding [GO:0005524]                                                                                                                                                                                                               |
| [309] | Q86UQ4 | ATP-binding cassette sub-family A member 13                                                                                                                                               | ATPase activity, coupled to transmembrane movement of substances [GO:0042626]; ATP binding [GO:0005524]; cholesterol transporter activity [GO:0017127]; phospholipid transporter activity [GO:0005548]                                                                                                                |
| [310] | P78363 | Retinal-specific ATP-binding cassette transporter (ATP-binding cassette sub-family A member 4) (RIM ABC transporter) (RIM protein) (RmP) (Stargardt disease protein)                      | ATPase activity, coupled to transmembrane movement of substances [GO:0042626]; ATP binding [GO:0005524]; cholesterol transporter activity [GO:0017127]; phospholipid-translocating ATPase activity [GO:0004012]; phospholipid transporter activity [GO:0005548]; transporter activity [GO:0005215]                    |
| [311] | Q2M3G0 | ATP-binding cassette sub-family B member 5 (ABCB5 P-gp) (P-glycoprotein ABCB5)                                                                                                            | ATPase activity, coupled to transmembrane movement of substances [GO:0042626]; ATP binding [GO:0005524]; efflux transmembrane transporter activity [GO:0015562]                                                                                                                                                       |
| [312] | O60706 | ATP-binding cassette sub-family C member 9 (Sulfonylurea receptor 2)                                                                                                                      | ATPase activity, coupled to transmembrane movement of substances [GO:0042626]; ATP binding [GO:0005524]; ion channel binding [GO:0044325]; potassium channel activity [GO:0005267]; potassium channel regulator activity [GO:0015459]; sulfonylurea receptor activity [GO:0008281]; transporter activity [GO:0005215] |
| [313] | Q09428 | ATP-binding cassette sub-family C member 8 (Sulfonylurea receptor 1)                                                                                                                      | ATPase activity, coupled to transmembrane movement of substances [GO:0042626]; ATP binding [GO:0005524]; ion channel binding [GO:0044325]; potassium channel activity [GO:0005267]; potassium ion transmembrane transporter activity [GO:0015079]; sulfonylurea receptor activity [GO:0008281]                        |
| [314] | Q92887 | Canalicular multispecific organic anion transporter 1 (ATP-binding cassette sub-family C member 2) (Canalicular multidrug resistance protein) (Multidrug resistance-associated protein 2) | ATPase activity, coupled to transmembrane movement of substances [GO:0042626]; ATP binding [GO:0005524]; organic anion transmembrane transporter activity [GO:0008514]                                                                                                                                                |
| [315] | O15440 | Multidrug resistance-associated protein 5 (ATP-binding cassette sub-family C member 5) (Multi-specific organic anion transporter C) (MOAT-C) (SMRP) (pABC11)                              | ATPase activity, coupled to transmembrane movement of substances [GO:0042626]; ATP binding [GO:0005524]; organic anion transmembrane transporter activity [GO:0008514]                                                                                                                                                |
| [316] | Q96J66 | ATP-binding cassette sub-family C member 11 (Multidrug resistance-associated protein 8)                                                                                                   | ATPase activity, coupled to transmembrane movement of substances [GO:0042626]; ATP binding [GO:0005524]; organic anion transmembrane transporter activity [GO:0008514]; purine nucleotide transmembrane transporter activity [GO:0015216]                                                                             |
| [317] | P21439 | Phosphatidylcholine translocator ABCB4 (ATP-binding cassette sub-family B member 4) (Multidrug resistance protein 3) (EC 3.6.3.44) (P-glycoprotein 3)                                     | ATPase activity, coupled to transmembrane movement of substances [GO:0042626]; ATP binding [GO:0005524]; phosphatidylcholine-translocating ATPase activity [GO:0090554]; phosphatidylcholine transporter activity [GO:0008525]; xenobiotic-transporting ATPase activity [GO:0008559]                                  |
| [318] | Q99758 | ATP-binding cassette sub-family A member 3 (ABC-C transporter) (ATP-binding cassette transporter 3) (ATP-binding cassette 3)                                                              | ATPase activity, coupled to transmembrane movement of substances [GO:0042626]; ATP binding [GO:0005524]; transporter activity [GO:0005215]                                                                                                                                                                            |
| [319] | Q9NRK6 | ATP-binding cassette sub-family B member 10, mitochondrial (ATP-binding cassette transporter 10) (ABC transporter 10 protein) (Mitochondrial                                              | ATPase activity, coupled to transmembrane movement of substances [GO:0042626]; ATP binding [GO:0005524]; transporter activity                                                                                                                                                                                         |



|       |        |                                                                                                                                                                                                                                                                      |                                                                                                                                                                                                                                                                                                                                                                                                                                                                                          |
|-------|--------|----------------------------------------------------------------------------------------------------------------------------------------------------------------------------------------------------------------------------------------------------------------------|------------------------------------------------------------------------------------------------------------------------------------------------------------------------------------------------------------------------------------------------------------------------------------------------------------------------------------------------------------------------------------------------------------------------------------------------------------------------------------------|
|       |        | ATP-binding cassette 2) (M-ABC2)                                                                                                                                                                                                                                     | [GO:0005215]                                                                                                                                                                                                                                                                                                                                                                                                                                                                             |
| [320] | O95255 | Multidrug resistance-associated protein 6 (ATP-binding cassette sub-family C member 6) (Anthracycline resistance-associated protein) (Multi-specific organic anion transporter E) (MOAT-E)                                                                           | ATPase activity, coupled to transmembrane movement of substances [GO:0042626]; ATP binding [GO:0005524]; transporter activity [GO:0005215]                                                                                                                                                                                                                                                                                                                                               |
| [321] | P08183 | Multidrug resistance protein 1 (EC 3.6.3.44) (ATP-binding cassette sub-family B member 1) (P-glycoprotein 1) (CD antigen CD243)                                                                                                                                      | ATPase activity, coupled to transmembrane movement of substances [GO:0042626]; ATP binding [GO:0005524]; transporter activity [GO:0005215]; xenobiotic-transporting ATPase activity [GO:0008559]                                                                                                                                                                                                                                                                                         |
| [322] | Q8IWQ3 | Serine/threonine-protein kinase BRSK2 (EC 2.7.11.1) (Brain-selective kinase 2) (EC 2.7.11.26) (Brain-specific serine/threonine-protein kinase 2) (BR serine/threonine-protein kinase 2) (Serine/threonine-protein kinase 29) (Serine/threonine-protein kinase SAD-A) | ATPase binding [GO:0051117]; ATPase regulator activity [GO:0060590]; ATP binding [GO:0005524]; magnesium ion binding [GO:0000287]; protein serine/threonine kinase activity [GO:0004674]; tau-protein kinase activity [GO:0050321]                                                                                                                                                                                                                                                       |
| [323] | Q86TM6 | E3 ubiquitin-protein ligase synoviolin (EC 6.3.2.-) (Synovial apoptosis inhibitor 1)                                                                                                                                                                                 | ATPase binding [GO:0051117]; chaperone binding [GO:0051087]; ligase activity [GO:0016874]; ubiquitin protein ligase activity [GO:0061630]; ubiquitin protein ligase activity involved in ERAD pathway [GO:1904264]; ubiquitin-specific protease binding [GO:1990381]; unfolded protein binding [GO:0051082]; zinc ion binding [GO:0008270]                                                                                                                                               |
| [324] | P16157 | Ankyrin-1 (ANK-1) (Ankyrin-R) (Erythrocyte ankyrin)                                                                                                                                                                                                                  | ATPase binding [GO:0051117]; cytoskeletal adaptor activity [GO:0008093]; enzyme binding [GO:0019899]; spectrin binding [GO:0030507]; structural constituent of cytoskeleton [GO:0005200]; structural molecule activity [GO:0005198]                                                                                                                                                                                                                                                      |
| [325] | Q01484 | Ankyrin-2 (ANK-2) (Ankyrin-B) (Brain ankyrin) (Non-erythroid ankyrin)                                                                                                                                                                                                | ATPase binding [GO:0051117]; enzyme binding [GO:0019899]; ion channel binding [GO:0044325]; potassium channel regulator activity [GO:0015459]; protein binding, bridging [GO:0030674]; protein kinase binding [GO:0019901]; spectrin binding [GO:0030507]                                                                                                                                                                                                                                |
| [326] | Q9UKV5 | E3 ubiquitin-protein ligase AMFR (EC 6.3.2.-) (Autocrine motility factor receptor) (AMF receptor) (RING finger protein 45) (gp78)                                                                                                                                    | BAT3 complex binding [GO:1904288]; chaperone binding [GO:0051087]; ligase activity [GO:0016874]; protein binding, bridging [GO:0030674]; receptor activity [GO:0004872]; ubiquitin protein ligase activity [GO:0061630]; ubiquitin protein ligase activity involved in ERAD pathway [GO:1904264]; ubiquitin-protein transferase activity [GO:0004842]; ubiquitin-specific protease binding [GO:1990381]; ubiquitin-ubiquitin ligase activity [GO:0034450]; zinc ion binding [GO:0008270] |
| [327] | Q9NSC2 | Sal-like protein 1 (Spalt-like transcription factor 1) (Zinc finger protein 794) (Zinc finger protein SALL1) (Zinc finger protein Spalt-1) (HSal1) (Sal-1)                                                                                                           | beta-catenin binding [GO:0008013]; chromatin binding [GO:0003682]; DNA binding [GO:0003677]; metal ion binding [GO:0046872]; RNA polymerase II core promoter proximal region sequence-specific DNA binding [GO:0000978]; transcriptional repressor activity, RNA polymerase II core promoter proximal region sequence-specific binding [GO:0001078]; transcription factor activity, sequence-specific DNA binding [GO:0003700]                                                           |
| [328] | O75575 | DNA-directed RNA polymerase III subunit RPC9 (RNA polymerase III subunit C9) (Calcitonin gene-related peptide-receptor component protein) (CGRP-RCP) (CGRP-receptor component protein)                                                                               | calcitonin gene-related peptide receptor activity [GO:0001635]; DNA-directed RNA polymerase activity [GO:0003899]; nucleotide binding [GO:0000166]                                                                                                                                                                                                                                                                                                                                       |

|       |        |                                                                                                                                                                                                                                                      |                                                                                                                                                                                                                                                                                                                                                                                                                                       |
|-------|--------|------------------------------------------------------------------------------------------------------------------------------------------------------------------------------------------------------------------------------------------------------|---------------------------------------------------------------------------------------------------------------------------------------------------------------------------------------------------------------------------------------------------------------------------------------------------------------------------------------------------------------------------------------------------------------------------------------|
|       |        | (CGRPRCP) (HsC17)                                                                                                                                                                                                                                    |                                                                                                                                                                                                                                                                                                                                                                                                                                       |
| [329] | P62879 | Guanine nucleotide-binding protein G(I)/G(S)/G(T) subunit beta-2 (G protein subunit beta-2) (Transducin beta chain 2)                                                                                                                                | calcium channel regulator activity [GO:0005246]; GTPase activity [GO:0003924]; GTPase binding [GO:0051020]; protein complex binding [GO:0032403]; signal transducer activity [GO:0004871]                                                                                                                                                                                                                                             |
| [330] | P46531 | Neurogenic locus notch homolog protein 1 (Notch 1) (hN1) (Translocation-associated notch protein TAN-1) [Cleaved into: Notch 1 extracellular truncation (NEXT); Notch 1 intracellular domain (NICD)]                                                 | calcium ion binding [GO:0005509]; chromatin DNA binding [GO:0031490]; core promoter binding [GO:0001047]; enzyme binding [GO:0019899]; enzyme inhibitor activity [GO:0004857]; receptor activity [GO:0004872]; sequence-specific DNA binding [GO:0043565]; transcriptional activator activity, RNA polymerase II transcription factor binding [GO:0001190]; transcription factor activity, sequence-specific DNA binding [GO:0003700] |
| [331] | P00740 | Coagulation factor IX (EC 3.4.21.22) (Christmas factor) (Plasma thromboplastin component) (PTC) [Cleaved into: Coagulation factor IXa light chain; Coagulation factor IXa heavy chain]                                                               | calcium ion binding [GO:0005509]; endopeptidase activity [GO:0004175]; serine-type endopeptidase activity [GO:0004252]                                                                                                                                                                                                                                                                                                                |
| [332] | P08709 | Coagulation factor VII (EC 3.4.21.21) (Proconvertin) (Serum prothrombin conversion accelerator) (SPCA) (Eptacog alfa) [Cleaved into: Factor VII light chain; Factor VII heavy chain]                                                                 | calcium ion binding [GO:0005509]; glycoprotein binding [GO:0001948]; serine-type endopeptidase activity [GO:0004252]; serine-type peptidase activity [GO:0008236]                                                                                                                                                                                                                                                                     |
| [333] | P09871 | Complement C1s subcomponent (EC 3.4.21.42) (C1 esterase) (Complement component 1 subcomponent s) [Cleaved into: Complement C1s subcomponent heavy chain; Complement C1s subcomponent light chain]                                                    | calcium ion binding [GO:0005509]; identical protein binding [GO:0042802]; serine-type endopeptidase activity [GO:0004252]                                                                                                                                                                                                                                                                                                             |
| [334] | P00709 | Alpha-lactalbumin (Lactose synthase B protein) (Lysozyme-like protein 7)                                                                                                                                                                             | calcium ion binding [GO:0005509]; lactose synthase activity [GO:0004461]                                                                                                                                                                                                                                                                                                                                                              |
| [335] | P00742 | Coagulation factor X (EC 3.4.21.6) (Stuart factor) (Stuart-Prower factor) [Cleaved into: Factor X light chain; Factor X heavy chain; Activated factor Xa heavy chain]                                                                                | calcium ion binding [GO:0005509]; phospholipid binding [GO:0005543]; serine-type endopeptidase activity [GO:0004252]                                                                                                                                                                                                                                                                                                                  |
| [336] | Q04721 | Neurogenic locus notch homolog protein 2 (Notch 2) (hN2) [Cleaved into: Notch 2 extracellular truncation (N2ECD); Notch 2 intracellular domain (N2ICD)]                                                                                              | calcium ion binding [GO:0005509]; receptor activity [GO:0004872]; transcription factor activity, ligand-activated RNA polymerase II transcription factor binding [GO:0038049]                                                                                                                                                                                                                                                         |
| [337] | P07478 | Trypsin-2 (EC 3.4.21.4) (Anionic trypsinogen) (Serine protease 2) (Trypsin II)                                                                                                                                                                       | calcium ion binding [GO:0005509]; serine-type endopeptidase activity [GO:0004252]                                                                                                                                                                                                                                                                                                                                                     |
| [338] | P04070 | Vitamin K-dependent protein C (EC 3.4.21.69) (Anticoagulant protein C) (Autoprothrombin IIA) (Blood coagulation factor XIV) [Cleaved into: Vitamin K-dependent protein C light chain; Vitamin K-dependent protein C heavy chain; Activation peptide] | calcium ion binding [GO:0005509]; serine-type endopeptidase activity [GO:0004252]                                                                                                                                                                                                                                                                                                                                                     |
| [339] | P00736 | Complement C1r subcomponent (EC 3.4.21.41) (Complement component 1 subcomponent r) [Cleaved into: Complement C1r subcomponent heavy chain; Complement C1r subcomponent light chain]                                                                  | calcium ion binding [GO:0005509]; serine-type endopeptidase activity [GO:0004252]; serine-type peptidase activity [GO:0008236]                                                                                                                                                                                                                                                                                                        |
| [340] | P35030 | Trypsin-3 (EC 3.4.21.4) (Brain trypsinogen) (Mesotrypsinogen) (Serine protease 3) (Serine protease 4) (Trypsin III) (Trypsin IV)                                                                                                                     | calcium ion binding [GO:0005509]; serine-type endopeptidase activity [GO:0004252]; serine-type peptidase activity [GO:0008236]                                                                                                                                                                                                                                                                                                        |
| [341] | P05981 | Serine protease hepsin (EC 3.4.21.106) (Transmembrane protease serine 1) [Cleaved into: Serine protease hepsin non-catalytic chain; Serine protease hepsin catalytic chain]                                                                          | calcium-activated potassium channel activity [GO:0015269]; peptidase activity [GO:0008233]; serine-type endopeptidase activity [GO:0004252]; serine-type exopeptidase activity [GO:0070008]; serine-type peptidase activity [GO:0008236]                                                                                                                                                                                              |
| [342] | O00187 | Mannan-binding lectin serine protease 2 (EC 3.4.21.104) (MBL-associated serine protease 2)                                                                                                                                                           | calcium-dependent protein binding [GO:0048306]; calcium ion binding [GO:0005509]; complement                                                                                                                                                                                                                                                                                                                                          |

|       |        |                                                                                                                                                                                                                                                                                                                                                                                                                                                            |                                                                                                                                                                                                                                                                                                                                                                                                                                                                                                                               |
|-------|--------|------------------------------------------------------------------------------------------------------------------------------------------------------------------------------------------------------------------------------------------------------------------------------------------------------------------------------------------------------------------------------------------------------------------------------------------------------------|-------------------------------------------------------------------------------------------------------------------------------------------------------------------------------------------------------------------------------------------------------------------------------------------------------------------------------------------------------------------------------------------------------------------------------------------------------------------------------------------------------------------------------|
|       |        | (Mannose-binding protein-associated serine protease 2) (MASP-2) [Cleaved into: Mannan-binding lectin serine protease 2 A chain; Mannan-binding lectin serine protease 2 B chain]                                                                                                                                                                                                                                                                           | component C4b binding [GO:0001855]; peptidase activity [GO:0008233]; serine-type endopeptidase activity [GO:0004252]                                                                                                                                                                                                                                                                                                                                                                                                          |
| [343] | P48740 | Mannan-binding lectin serine protease 1 (EC 3.4.21.-) (Complement factor MASP-3) (Complement-activating component of Ra-reactive factor) (Mannose-binding lectin-associated serine protease 1) (MASP-1) (Mannose-binding protein-associated serine protease) (Ra-reactive factor serine protease p100) (RaRF) (Serine protease 5) [Cleaved into: Mannan-binding lectin serine protease 1 heavy chain; Mannan-binding lectin serine protease 1 light chain] | calcium-dependent protein binding [GO:0048306]; calcium ion binding [GO:0005509]; peptidase activity [GO:0008233]; protein homodimerization activity [GO:0042803]; serine-type endopeptidase activity [GO:0004252]                                                                                                                                                                                                                                                                                                            |
| [344] | Q66K89 | Transcription factor E4F1 (EC 6.3.2.-) (E4F transcription factor 1) (Putative E3 ubiquitin-protein ligase E4F1) (Transcription factor E4F) (p120E4F) (p50E4F)                                                                                                                                                                                                                                                                                              | cAMP response element binding [GO:0035497]; DNA binding [GO:0003677]; ligase activity [GO:0016874]; metal ion binding [GO:0046872]; RNA polymerase II regulatory region sequence-specific DNA binding [GO:0000977]; transcriptional repressor activity, RNA polymerase II transcription regulatory region sequence-specific binding [GO:0001227]; transcription coactivator activity [GO:0003713]; transcription corepressor activity [GO:0003714]; transcription factor activity, sequence-specific DNA binding [GO:0003700] |
| [345] | O14775 | Guanine nucleotide-binding protein subunit beta-5 (Gbeta5) (Transducin beta chain 5)                                                                                                                                                                                                                                                                                                                                                                       | chaperone binding [GO:0051087]; G-protein gamma-subunit binding [GO:0031682]; GTPase activity [GO:0003924]; signal transducer activity [GO:0004871]                                                                                                                                                                                                                                                                                                                                                                           |
| [346] | P11441 | Ubiquitin-like protein 4A (Ubiquitin-like protein GDX)                                                                                                                                                                                                                                                                                                                                                                                                     | chaperone binding [GO:0051087]; ubiquitin-like protein transferase activity [GO:0019787]                                                                                                                                                                                                                                                                                                                                                                                                                                      |
| [347] | P41182 | B-cell lymphoma 6 protein (BCL-6) (B-cell lymphoma 5 protein) (BCL-5) (Protein LAZ-3) (Zinc finger and BTB domain-containing protein 27) (Zinc finger protein 51)                                                                                                                                                                                                                                                                                          | chromatin binding [GO:0003682]; chromatin DNA binding [GO:0031490]; intronic transcription regulatory region sequence-specific DNA binding [GO:0001161]; metal ion binding [GO:0046872]; RNA polymerase II regulatory region sequence-specific DNA binding [GO:0000977]; sequence-specific DNA binding [GO:0043565]; transcriptional repressor activity, RNA polymerase II transcription regulatory region sequence-specific binding [GO:0001227]; transcription factor activity, sequence-specific DNA binding [GO:0003700]  |
| [348] | P05423 | DNA-directed RNA polymerase III subunit RPC4 (RNA polymerase III subunit C4) (DNA-directed RNA polymerase III subunit D) (Protein BN51) (RNA polymerase III 47 kDa subunit) (RPC53 homolog)                                                                                                                                                                                                                                                                | chromatin binding [GO:0003682]; DNA binding [GO:0003677]; DNA-directed RNA polymerase activity [GO:0003899]                                                                                                                                                                                                                                                                                                                                                                                                                   |
| [349] | O14802 | DNA-directed RNA polymerase III subunit RPC1 (RNA polymerase III subunit C1) (EC 2.7.7.6) (DNA-directed RNA polymerase III largest subunit) (DNA-directed RNA polymerase III subunit A) (RNA polymerase III 155 kDa subunit) (RPC155) (RNA polymerase III subunit C160)                                                                                                                                                                                    | chromatin binding [GO:0003682]; DNA binding [GO:0003677]; DNA-directed RNA polymerase activity [GO:0003899]; ribonucleoside binding [GO:0032549]; zinc ion binding [GO:0008270]                                                                                                                                                                                                                                                                                                                                               |
| [350] | Q9BRR0 | Zinc finger protein with KRAB and SCAN domains 3 (Zinc finger and SCAN domain-containing protein 13) (Zinc finger protein 306) (Zinc finger protein 309) (Zinc finger protein 47 homolog) (Zf47) (Zfp-47)                                                                                                                                                                                                                                                  | chromatin binding [GO:0003682]; DNA binding [GO:0003677]; metal ion binding [GO:0046872]; RNA polymerase II core promoter proximal region sequence-specific DNA binding [GO:0000978]; sequence-specific DNA binding [GO:0043565]; transcriptional repressor activity, RNA polymerase II core promoter proximal region sequence-specific                                                                                                                                                                                       |

|       |        |                                                                                                                                                                                                                                                                               |                                                                                                                                                                                                                                                                                                                                                                                                                                                                         |
|-------|--------|-------------------------------------------------------------------------------------------------------------------------------------------------------------------------------------------------------------------------------------------------------------------------------|-------------------------------------------------------------------------------------------------------------------------------------------------------------------------------------------------------------------------------------------------------------------------------------------------------------------------------------------------------------------------------------------------------------------------------------------------------------------------|
|       |        |                                                                                                                                                                                                                                                                               | binding [GO:0001078]; transcription factor activity, sequence-specific DNA binding [GO:0003700]                                                                                                                                                                                                                                                                                                                                                                         |
| [351] | Q9HBE1 | POZ-, AT hook-, and zinc finger-containing protein 1 (BTB/POZ domain zinc finger transcription factor) (Protein kinase A RI subunit alpha-associated protein) (Zinc finger and BTB domain-containing protein 19) (Zinc finger protein 278) (Zinc finger sarcoma gene protein) | chromatin binding [GO:0003682]; DNA binding [GO:0003677]; metal ion binding [GO:0046872]; RNA polymerase II core promoter proximal region sequence-specific DNA binding [GO:0000978]; transcriptional activator activity, RNA polymerase II core promoter proximal region sequence-specific binding [GO:0001077]                                                                                                                                                        |
| [352] | P29375 | Lysine-specific demethylase 5A (EC 1.14.11.-) (Histone demethylase JARID1A) (Jumonji/ARID domain-containing protein 1A) (Retinoblastoma-binding protein 2) (RBBP-2)                                                                                                           | chromatin binding [GO:0003682]; DNA binding [GO:0003677]; oxidoreductase activity, acting on paired donors, with incorporation or reduction of molecular oxygen, 2-oxoglutarate as one donor, and incorporation of one atom each of oxygen into both donors [GO:0016706]; transcription coactivator activity [GO:0003713]; transcription factor activity, sequence-specific DNA binding [GO:0003700]; zinc ion binding [GO:0008270]                                     |
| [353] | Q13112 | Chromatin assembly factor 1 subunit B (CAF-1 subunit B) (Chromatin assembly factor I p60 subunit) (CAF-I 60 kDa subunit) (CAF-I p60) (M-phase phosphoprotein 7)                                                                                                               | chromatin binding [GO:0003682]; histone binding [GO:0042393]; unfolded protein binding [GO:0051082]                                                                                                                                                                                                                                                                                                                                                                     |
| [354] | Q04724 | Transducin-like enhancer protein 1 (E(Sp1) homolog) (Enhancer of split groucho-like protein 1) (ESG1)                                                                                                                                                                         | chromatin binding [GO:0003682]; identical protein binding [GO:0042802]; RNA polymerase II transcription corepressor activity [GO:0001106]; transcription factor binding [GO:0008134]                                                                                                                                                                                                                                                                                    |
| [355] | O43623 | Zinc finger protein SNAI2 (Neural crest transcription factor Slug) (Protein snail homolog 2)                                                                                                                                                                                  | chromatin binding [GO:0003682]; metal ion binding [GO:0046872]; sequence-specific DNA binding [GO:0043565]; transcriptional repressor activity, RNA polymerase II core promoter proximal region sequence-specific binding [GO:0001078]; transcription factor activity, RNA polymerase II distal enhancer sequence-specific binding [GO:0003705]                                                                                                                         |
| [356] | Q9GZV1 | Ankyrin repeat domain-containing protein 2 (Skeletal muscle ankyrin repeat protein) (hArpp)                                                                                                                                                                                   | chromatin binding [GO:0003682]; protein kinase B binding [GO:0043422]; RNA polymerase II sequence-specific DNA binding transcription factor binding [GO:0061629]; structural constituent of muscle [GO:0008307]; titin binding [GO:0031432]                                                                                                                                                                                                                             |
| [357] | Q8N7H5 | RNA polymerase II-associated factor 1 homolog (hPAF1) (Pancreatic differentiation protein 2)                                                                                                                                                                                  | chromatin binding [GO:0003682]; RNA polymerase II core binding [GO:0000993]                                                                                                                                                                                                                                                                                                                                                                                             |
| [358] | Q04727 | Transducin-like enhancer protein 4 (Grg-4) (Groucho-related protein 4)                                                                                                                                                                                                        | chromatin binding [GO:0003682]; transcription corepressor activity [GO:0003714]; transcription factor activity, RNA polymerase II distal enhancer sequence-specific binding [GO:0003705]                                                                                                                                                                                                                                                                                |
| [359] | P00751 | Complement factor B (EC 3.4.21.47) (C3/C5 convertase) (Glycine-rich beta glycoprotein) (GBG) (PBF2) (Properdin factor B) [Cleaved into: Complement factor B Ba fragment; Complement factor B Bb fragment]                                                                     | complement binding [GO:0001848]; serine-type endopeptidase activity [GO:0004252]                                                                                                                                                                                                                                                                                                                                                                                        |
| [360] | Q14872 | Metal regulatory transcription factor 1 (MRE-binding transcription factor) (Transcription factor MTF-1)                                                                                                                                                                       | core promoter binding [GO:0001047]; DNA binding [GO:0003677]; metal ion binding [GO:0046872]; RNA polymerase II core promoter proximal region sequence-specific DNA binding [GO:0000978]; RNA polymerase II core promoter sequence-specific DNA binding [GO:0000979]; transcriptional activator activity, RNA polymerase II core promoter proximal region sequence-specific binding [GO:0001077]; transcription coactivator activity [GO:0003713]; transcription factor |

|       |        |                                                                                                                                                                                                                                                                                                      |                                                                                                                                                                                                                                                                                                                               |
|-------|--------|------------------------------------------------------------------------------------------------------------------------------------------------------------------------------------------------------------------------------------------------------------------------------------------------------|-------------------------------------------------------------------------------------------------------------------------------------------------------------------------------------------------------------------------------------------------------------------------------------------------------------------------------|
|       |        |                                                                                                                                                                                                                                                                                                      | activity, sequence-specific DNA binding [GO:0003700]                                                                                                                                                                                                                                                                          |
| [361] | Q8IXW5 | Putative RNA polymerase II subunit B1 CTD phosphatase RPAP2 (EC 3.1.3.16) (RNA polymerase II-associated protein 2)                                                                                                                                                                                   | CTD phosphatase activity [GO:0008420]; metal ion binding [GO:0046872]                                                                                                                                                                                                                                                         |
| [362] | Q86WV6 | Stimulator of interferon genes protein (hSTING) (Endoplasmic reticulum interferon stimulator) (ERIS) (Mediator of IRF3 activation) (hMITA) (Transmembrane protein 173)                                                                                                                               | cyclic-di-GMP binding [GO:0035438]; cyclic-GMP-AMP binding [GO:0061507]; identical protein binding [GO:0042802]; protein homodimerization activity [GO:0042803]; protein kinase binding [GO:0019901]; transcription factor binding [GO:0008134]                                                                               |
| [363] | P31941 | DNA dC->dU-editing enzyme APOBEC-3A (A3A) (EC 3.5.4.-) (Phorbolin-1)                                                                                                                                                                                                                                 | cytidine deaminase activity [GO:0004126]; deoxycytidine deaminase activity [GO:0047844]; zinc ion binding [GO:0008270]                                                                                                                                                                                                        |
| [364] | Q9GZX7 | Single-stranded DNA cytosine deaminase (EC 3.5.4.38) (Activation-induced cytidine deaminase) (Cytidine aminohydrolase)                                                                                                                                                                               | cytidine deaminase activity [GO:0004126]; ubiquitin protein ligase binding [GO:0031625]; zinc ion binding [GO:0008270]                                                                                                                                                                                                        |
| [365] | Q9NS91 | E3 ubiquitin-protein ligase RAD18 (EC 6.3.2.-) (Postreplication repair protein RAD18) (hHR18) (hRAD18) (RING finger protein 73)                                                                                                                                                                      | damaged DNA binding [GO:0003684]; ligase activity [GO:0016874]; polyubiquitin binding [GO:0031593]; single-stranded DNA-dependent ATPase activity [GO:0043142]; ubiquitin protein ligase activity [GO:0061630]; ubiquitin protein ligase binding [GO:0031625]; Y-form DNA binding [GO:0000403]; zinc ion binding [GO:0008270] |
| [366] | Q9NUX5 | Protection of telomeres protein 1 (hPot1) (POT1-like telomere end-binding protein)                                                                                                                                                                                                                   | DEAD/H-box RNA helicase binding [GO:0017151]; G-rich strand telomeric DNA binding [GO:0098505]; single-stranded telomeric DNA binding [GO:0043047]; telomerase inhibitor activity [GO:0010521]                                                                                                                                |
| [367] | Q9UK73 | Protein fem-1 homolog B (FEM1b) (FEM1-beta) (Fem-1-like death receptor-binding protein alpha) (Fem-1-like in apoptotic pathway protein alpha) (F1A-alpha)                                                                                                                                            | death receptor binding [GO:0005123]; ubiquitin-protein transferase activity [GO:0004842]                                                                                                                                                                                                                                      |
| [368] | Q9UH17 | DNA dC->dU-editing enzyme APOBEC-3B (A3B) (EC 3.5.4.-) (Phorbolin-1-related protein) (Phorbolin-2/3)                                                                                                                                                                                                 | deoxycytidine deaminase activity [GO:0047844]; poly(A) RNA binding [GO:0044822]; zinc ion binding [GO:0008270]                                                                                                                                                                                                                |
| [369] | Q6B0I6 | Lysine-specific demethylase 4D (EC 1.14.11.-) (JmjC domain-containing histone demethylation protein 3D) (Jumonji domain-containing protein 2D)                                                                                                                                                       | dioxygenase activity [GO:0051213]; histone demethylase activity (H3-K9 specific) [GO:0032454]; metal ion binding [GO:0046872]                                                                                                                                                                                                 |
| [370] | B2RXH2 | Lysine-specific demethylase 4E (EC 1.14.11.-) (KDM4D-like protein) (Lysine-specific demethylase 4D-like)                                                                                                                                                                                             | dioxygenase activity [GO:0051213]; metal ion binding [GO:0046872]                                                                                                                                                                                                                                                             |
| [371] | Q15652 | Probable JmjC domain-containing histone demethylation protein 2C (EC 1.14.11.-) (Jumonji domain-containing protein 1C) (Thyroid receptor-interacting protein 8) (TR-interacting protein 8) (TRIP-8)                                                                                                  | dioxygenase activity [GO:0051213]; metal ion binding [GO:0046872]; thyroid hormone receptor binding [GO:0046966]                                                                                                                                                                                                              |
| [372] | O94953 | Lysine-specific demethylase 4B (EC 1.14.11.-) (JmjC domain-containing histone demethylation protein 3B) (Jumonji domain-containing protein 2B)                                                                                                                                                       | dioxygenase activity [GO:0051213]; zinc ion binding [GO:0008270]                                                                                                                                                                                                                                                              |
| [373] | Q15573 | TATA box-binding protein-associated factor RNA polymerase I subunit A (RNA polymerase I-specific TBP-associated factor 48 kDa) (TAFI48) (TATA box-binding protein-associated factor 1A) (TBP-associated factor 1A) (Transcription factor SL1) (Transcription initiation factor SL1/TIF-IB subunit A) | DNA binding [GO:0003677]                                                                                                                                                                                                                                                                                                      |
| [374] | Q9H5J8 | TATA box-binding protein-associated factor RNA polymerase I subunit D (RNA polymerase I-                                                                                                                                                                                                             | DNA binding [GO:0003677]                                                                                                                                                                                                                                                                                                      |

|       |        |                                                                                                                                                                                                                                    |                                                                                                                                                                                                                                                                                                                                                                                        |
|-------|--------|------------------------------------------------------------------------------------------------------------------------------------------------------------------------------------------------------------------------------------|----------------------------------------------------------------------------------------------------------------------------------------------------------------------------------------------------------------------------------------------------------------------------------------------------------------------------------------------------------------------------------------|
|       |        | specific TBP-associated factor 41 kDa) (TAFI41) (TATA box-binding protein-associated factor 1D) (TBP-associated factor 1D) (Transcription initiation factor SL1/TIF-IB subunit D)                                                  |                                                                                                                                                                                                                                                                                                                                                                                        |
| [375] | Q96AP0 | Adrenocortical dysplasia protein homolog (POT1 and TIN2-interacting protein)                                                                                                                                                       | DNA binding [GO:0003677]; DNA polymerase binding [GO:0070182]                                                                                                                                                                                                                                                                                                                          |
| [376] | P19387 | DNA-directed RNA polymerase II subunit RPB3 (RNA polymerase II subunit 3) (RNA polymerase II subunit B3) (DNA-directed RNA polymerase II 33 kDa polypeptide) (RPB33) (DNA-directed RNA polymerase II subunit C) (RPB31)            | DNA binding [GO:0003677]; DNA-directed RNA polymerase activity [GO:0003899]                                                                                                                                                                                                                                                                                                            |
| [377] | Q9BUI4 | DNA-directed RNA polymerase III subunit RPC3 (RNA polymerase III subunit C3) (DNA-directed RNA polymerase III subunit C) (RNA polymerase III 62 kDa subunit) (RPC62)                                                               | DNA binding [GO:0003677]; DNA-directed RNA polymerase activity [GO:0003899]                                                                                                                                                                                                                                                                                                            |
| [378] | Q9H1D9 | DNA-directed RNA polymerase III subunit RPC6 (RNA polymerase III subunit C6) (DNA-directed RNA polymerase III subunit F) (RNA polymerase III 39 kDa subunit) (RPC39)                                                               | DNA binding [GO:0003677]; DNA-directed RNA polymerase activity [GO:0003899]                                                                                                                                                                                                                                                                                                            |
| [379] | Q9Y535 | DNA-directed RNA polymerase III subunit RPC8 (RNA polymerase III subunit C8) (DNA-directed RNA polymerase III subunit H) (RNA polymerase III subunit 22.9 kDa subunit) (RPC22.9)                                                   | DNA binding [GO:0003677]; DNA-directed RNA polymerase activity [GO:0003899]                                                                                                                                                                                                                                                                                                            |
| [380] | O15160 | DNA-directed RNA polymerases I and III subunit RPAC1 (DNA-directed RNA polymerase I subunit C) (RNA polymerases I and III subunit AC1) (AC40) (DNA-directed RNA polymerases I and III 40 kDa polypeptide) (RPA40) (RPA39) (RPC40)  | DNA binding [GO:0003677]; DNA-directed RNA polymerase activity [GO:0003899]                                                                                                                                                                                                                                                                                                            |
| [381] | Q9Y2S0 | DNA-directed RNA polymerases I and III subunit RPAC2 (RNA polymerases I and III subunit AC2) (AC19) (DNA-directed RNA polymerase I subunit D) (RNA polymerase I 16 kDa subunit) (RPA16) (RPC16) (hRPA19)                           | DNA binding [GO:0003677]; DNA-directed RNA polymerase activity [GO:0003899]                                                                                                                                                                                                                                                                                                            |
| [382] | Q9BWH6 | RNA polymerase II-associated protein 1                                                                                                                                                                                             | DNA binding [GO:0003677]; DNA-directed RNA polymerase activity [GO:0003899]                                                                                                                                                                                                                                                                                                            |
| [383] | Q9H9Y6 | DNA-directed RNA polymerase I subunit RPA2 (RNA polymerase I subunit 2) (EC 2.7.7.6) (DNA-directed RNA polymerase I 135 kDa polypeptide) (RPA135)                                                                                  | DNA binding [GO:0003677]; DNA-directed RNA polymerase activity [GO:0003899]; metal ion binding [GO:0046872]; ribonucleoside binding [GO:0032549]                                                                                                                                                                                                                                       |
| [384] | Q9NW08 | DNA-directed RNA polymerase III subunit RPC2 (RNA polymerase III subunit C2) (EC 2.7.7.6) (C128) (DNA-directed RNA polymerase III 127.6 kDa polypeptide) (DNA-directed RNA polymerase III subunit B)                               | DNA binding [GO:0003677]; DNA-directed RNA polymerase activity [GO:0003899]; metal ion binding [GO:0046872]; ribonucleoside binding [GO:0032549]                                                                                                                                                                                                                                       |
| [385] | O95602 | DNA-directed RNA polymerase I subunit RPA1 (RNA polymerase I subunit A1) (EC 2.7.7.6) (A190) (DNA-directed RNA polymerase I largest subunit) (DNA-directed RNA polymerase I subunit A) (RNA polymerase I 194 kDa subunit) (RPA194) | DNA binding [GO:0003677]; DNA-directed RNA polymerase activity [GO:0003899]; zinc ion binding [GO:0008270]                                                                                                                                                                                                                                                                             |
| [386] | Q05516 | Zinc finger and BTB domain-containing protein 16 (Promyelocytic leukemia zinc finger protein) (Zinc finger protein 145) (Zinc finger protein PLZF)                                                                                 | DNA binding [GO:0003677]; double-stranded DNA binding [GO:0003690]; identical protein binding [GO:0042802]; metal ion binding [GO:0046872]; protein homodimerization activity [GO:0042803]; RNA polymerase II distal enhancer sequence-specific DNA binding [GO:0000980]; transcriptional repressor activity, RNA polymerase II distal enhancer sequence-specific binding [GO:0001206] |
| [387] | Q9H171 | Z-DNA-binding protein 1 (Tumor stroma and activated macrophage protein DLM-1)                                                                                                                                                      | DNA binding [GO:0003677]; double-stranded RNA adenosine deaminase activity [GO:0003726]; left-handed Z-DNA binding [GO:0003692]; RNA                                                                                                                                                                                                                                                   |

|       |        |                                                                                                                                                                                                                          |                                                                                                                                                                                                                                                                                                                                                                                                                                                                                                                                                                                                            |
|-------|--------|--------------------------------------------------------------------------------------------------------------------------------------------------------------------------------------------------------------------------|------------------------------------------------------------------------------------------------------------------------------------------------------------------------------------------------------------------------------------------------------------------------------------------------------------------------------------------------------------------------------------------------------------------------------------------------------------------------------------------------------------------------------------------------------------------------------------------------------------|
|       |        |                                                                                                                                                                                                                          | binding [GO:0003723]                                                                                                                                                                                                                                                                                                                                                                                                                                                                                                                                                                                       |
| [388] | P25490 | Transcriptional repressor protein YY1 (Delta transcription factor) (INO80 complex subunit S) (NF-E1) (Yin and yang 1) (YY-1)                                                                                             | DNA binding [GO:0003677]; enhancer sequence-specific DNA binding [GO:0001158]; four-way junction DNA binding [GO:0000400]; RNA binding [GO:0003723]; SMAD binding [GO:0046332]; transcriptional repressor activity, RNA polymerase II core promoter proximal region sequence-specific binding [GO:0001078]; transcription coactivator activity [GO:0003713]; transcription corepressor activity [GO:0003714]; transcription factor activity, sequence-specific DNA binding [GO:0003700]; transcription regulatory region DNA binding [GO:0044212]; zinc ion binding [GO:0008270]                           |
| [389] | Q9UKN8 | General transcription factor 3C polypeptide 4 (EC 2.3.1.48) (TF3C-delta) (Transcription factor IIIC 90 kDa subunit) (TFIIIC 90 kDa subunit) (TFIIIC90) (Transcription factor IIIC subunit delta)                         | DNA binding [GO:0003677]; enzyme activator activity [GO:0008047]; histone acetyltransferase activity [GO:0004402]                                                                                                                                                                                                                                                                                                                                                                                                                                                                                          |
| [390] | Q9UGL1 | Lysine-specific demethylase 5B (EC 1.14.11.-) (Cancer/testis antigen 31) (CT31) (Histone demethylase JARID1B) (Jumonji/ARID domain-containing protein 1B) (PLU-1) (Retinoblastoma-binding protein 2 homolog 1) (RBP2-H1) | DNA binding [GO:0003677]; histone demethylase activity (H3-dimethyl-K4 specific) [GO:0034648]; histone demethylase activity (H3-K4 specific) [GO:0032453]; histone demethylase activity (H3-trimethyl-K4 specific) [GO:0034647]; oxidoreductase activity, acting on paired donors, with incorporation or reduction of molecular oxygen, 2-oxoglutarate as one donor, and incorporation of one atom each of oxygen into both donors [GO:0016706]; transcription corepressor activity [GO:0003714]; transcription factor activity, sequence-specific DNA binding [GO:0003700]; zinc ion binding [GO:0008270] |
| [391] | P41229 | Lysine-specific demethylase 5C (EC 1.14.11.-) (Histone demethylase JARID1C) (Jumonji/ARID domain-containing protein 1C) (Protein SmcX) (Protein Xe169)                                                                   | DNA binding [GO:0003677]; histone demethylase activity (H3-K4 specific) [GO:0032453]; oxidoreductase activity, acting on paired donors, with incorporation or reduction of molecular oxygen, 2-oxoglutarate as one donor, and incorporation of one atom each of oxygen into both donors [GO:0016706]; zinc ion binding [GO:0008270]                                                                                                                                                                                                                                                                        |
| [392] | Q9BY66 | Lysine-specific demethylase 5D (EC 1.14.11.-) (Histocompatibility Y antigen) (H-Y) (Histone demethylase JARID1D) (Jumonji/ARID domain-containing protein 1D) (Protein SmcY)                                              | DNA binding [GO:0003677]; histone demethylase activity (H3-K4 specific) [GO:0032453]; oxidoreductase activity, acting on paired donors, with incorporation or reduction of molecular oxygen, 2-oxoglutarate as one donor, and incorporation of one atom each of oxygen into both donors [GO:0016706]; zinc ion binding [GO:0008270]                                                                                                                                                                                                                                                                        |
| [393] | Q9NQV6 | PR domain zinc finger protein 10 (EC 2.1.1.-) (PR domain-containing protein 10) (Tristanin)                                                                                                                              | DNA binding [GO:0003677]; metal ion binding [GO:0046872]; methyltransferase activity [GO:0008168]                                                                                                                                                                                                                                                                                                                                                                                                                                                                                                          |
| [394] | Q03923 | Zinc finger protein 85 (Zinc finger protein HPF4) (Zinc finger protein HTF1)                                                                                                                                             | DNA binding [GO:0003677]; metal ion binding [GO:0046872]; RNA polymerase II core promoter proximal region sequence-specific DNA binding [GO:0000978]; transcription corepressor activity [GO:0003714]; transcription factor activity, sequence-specific DNA binding [GO:0003700]                                                                                                                                                                                                                                                                                                                           |
| [395] | Q9NX65 | Zinc finger and SCAN domain-containing protein 32 (Human cervical cancer suppressor gene 5 protein) (HCCS-5) (Zinc finger protein 434)                                                                                   | DNA binding [GO:0003677]; metal ion binding [GO:0046872]; RNA polymerase II transcription factor activity, sequence-specific DNA binding [GO:0000981]                                                                                                                                                                                                                                                                                                                                                                                                                                                      |
| [396] | A6NJL1 | Zinc finger and SCAN domain-containing protein                                                                                                                                                                           | DNA binding [GO:0003677]; metal ion binding                                                                                                                                                                                                                                                                                                                                                                                                                                                                                                                                                                |

|       |        |                                                                                                                                                                                         |                                                                                                                                                                                                                                                     |
|-------|--------|-----------------------------------------------------------------------------------------------------------------------------------------------------------------------------------------|-----------------------------------------------------------------------------------------------------------------------------------------------------------------------------------------------------------------------------------------------------|
|       |        | 5B                                                                                                                                                                                      | [GO:0046872]; RNA polymerase II transcription factor activity, sequence-specific DNA binding [GO:0000981]                                                                                                                                           |
| [397] | Q8TF47 | Zinc finger protein 90 homolog (Zfp-90) (Zinc finger protein 756)                                                                                                                       | DNA binding [GO:0003677]; metal ion binding [GO:0046872]; transcriptional repressor activity, RNA polymerase II core promoter proximal region sequence-specific binding [GO:0001078]                                                                |
| [398] | Q8TD23 | Zinc finger protein 675 (TRAF6-binding zinc finger protein) (TRAF6-inhibitory zinc finger protein)                                                                                      | DNA binding [GO:0003677]; RNA polymerase II core promoter proximal region sequence-specific DNA binding [GO:0000978]; ubiquitin protein ligase binding [GO:0031625]; zinc ion binding [GO:0008270]                                                  |
| [399] | Q92985 | Interferon regulatory factor 7 (IRF-7)                                                                                                                                                  | DNA binding [GO:0003677]; RNA polymerase II core promoter sequence-specific DNA binding [GO:0000979]; transcription factor activity, RNA polymerase II core promoter proximal region sequence-specific binding [GO:0000982]                         |
| [400] | O60318 | Germinal-center associated nuclear protein (GANP) (80 kDa MCM3-associated protein) (MCM3 acetylating protein) (MCM3AP) (EC 2.3.1.-) (MCM3 acetyltransferase)                            | DNA binding [GO:0003677]; transferase activity, transferring acyl groups [GO:0016746]                                                                                                                                                               |
| [401] | Q9Y3C5 | RING finger protein 11                                                                                                                                                                  | DNA binding [GO:0003677]; ubiquitin-protein transferase activity [GO:0004842]; zinc ion binding [GO:0008270]                                                                                                                                        |
| [402] | Q9NVU0 | DNA-directed RNA polymerase III subunit RPC5 (RNA polymerase III subunit C5) (DNA-directed RNA polymerase III 80 kDa polypeptide)                                                       | DNA-directed RNA polymerase activity [GO:0003899]                                                                                                                                                                                                   |
| [403] | Q9H944 | Mediator of RNA polymerase II transcription subunit 20 (Mediator complex subunit 20) (TRF-proximal protein homolog) (hTRFP)                                                             | DNA-directed RNA polymerase activity [GO:0003899]; RNA polymerase II transcription cofactor activity [GO:0001104]; transcription coactivator activity [GO:0003713]; ubiquitin protein ligase activity [GO:0061630]                                  |
| [404] | P43034 | Platelet-activating factor acetylhydrolase IB subunit alpha (Lissencephaly-1 protein) (LIS-1) (PAF acetylhydrolase 45 kDa subunit) (PAF-AH 45 kDa subunit) (PAF-AH alpha) (PAFAH alpha) | dynactin binding [GO:0034452]; dynein binding [GO:0045502]; heparin binding [GO:0008201]; microtubule binding [GO:0008017]; phospholipase binding [GO:0043274]; phosphoprotein binding [GO:0051219]; protein homodimerization activity [GO:0042803] |
| [405] | A1KZ92 | Peroxidasin-like protein (EC 1.11.1.7) (Cardiac peroxidase) (Vascular peroxidase 2) (polysomal ribonuclease 1) (PRM1)                                                                   | endonuclease activity [GO:0004519]; heme binding [GO:0020037]; metal ion binding [GO:0046872]; peroxidase activity [GO:0004601]                                                                                                                     |
| [406] | P07288 | Prostate-specific antigen (PSA) (EC 3.4.21.77) (Gamma-seminoprotein) (Seminin) (Kallikrein-3) (P-30 antigen) (Semenogelase)                                                             | endopeptidase activity [GO:0004175]; hydrolase activity, acting on carbon-nitrogen (but not peptide) bonds, in linear amides [GO:0016811]; serine-type endopeptidase activity [GO:0004252]; serine-type peptidase activity [GO:0008236]             |
| [407] | Q9HB65 | RNA polymerase II elongation factor ELL3                                                                                                                                                | enhancer binding [GO:0035326]                                                                                                                                                                                                                       |
| [408] | O60237 | Protein phosphatase 1 regulatory subunit 12B (Myosin phosphatase-targeting subunit 2) (Myosin phosphatase target subunit 2)                                                             | enzyme activator activity [GO:0008047]; phosphatase regulator activity [GO:0019208]                                                                                                                                                                 |
| [409] | P25963 | NF-kappa-B inhibitor alpha (I-kappa-B-alpha) (Ikb-alpha) (IkappaBalpha) (Major histocompatibility complex enhancer-binding protein MAD3)                                                | enzyme binding [GO:0019899]; identical protein binding [GO:0042802]; NF-kappaB binding [GO:0051059]; nuclear localization sequence binding [GO:0008139]; transcription factor binding [GO:0008134]; ubiquitin protein ligase binding [GO:0031625]   |
| [410] | Q9BWG6 | Sodium channel modifier 1                                                                                                                                                               | enzyme binding [GO:0019899]; metal ion binding [GO:0046872]                                                                                                                                                                                         |
| [411] | Q9H2K2 | Tankyrase-2 (TANK2) (EC 2.4.2.30) (ADP-ribosyltransferase diphtheria toxin-like 6) (ARTD6) (Poly [ADP-ribose] polymerase 5B) (TNKS-2) (TRF1-interacting ankyrin-related ADP-            | enzyme binding [GO:0019899]; metal ion binding [GO:0046872]; NAD+ ADP-ribosyltransferase activity [GO:0003950]                                                                                                                                      |



|       |        |                                                                                                                                                                                                                     |                                                                                                                                                                                                                                                                                                                                                               |
|-------|--------|---------------------------------------------------------------------------------------------------------------------------------------------------------------------------------------------------------------------|---------------------------------------------------------------------------------------------------------------------------------------------------------------------------------------------------------------------------------------------------------------------------------------------------------------------------------------------------------------|
|       |        | ribose polymerase 2) (Tankyrase II) (Tankyrase-like protein) (Tankyrase-related protein)                                                                                                                            |                                                                                                                                                                                                                                                                                                                                                               |
| [412] | O00628 | Peroxisomal targeting signal 2 receptor (PTS2 receptor) (Peroxin-7)                                                                                                                                                 | enzyme binding [GO:0019899]; peroxisome matrix targeting signal-2 binding [GO:0005053]; protein homodimerization activity [GO:0042803]                                                                                                                                                                                                                        |
| [413] | Q12834 | Cell division cycle protein 20 homolog (p55CDC)                                                                                                                                                                     | enzyme binding [GO:0019899]; protein C-terminus binding [GO:0008022]                                                                                                                                                                                                                                                                                          |
| [414] | P20226 | TATA-box-binding protein (TATA sequence-binding protein) (TATA-binding factor) (TATA-box factor) (Transcription initiation factor TFIID TBP subunit)                                                                | enzyme binding [GO:0019899]; repressing transcription factor binding [GO:0070491]; RNA polymerase II core promoter proximal region sequence-specific DNA binding [GO:0000978]; transcription factor activity, sequence-specific DNA binding [GO:0003700]; transcription factor binding [GO:0008134]; transcription regulatory region DNA binding [GO:0044212] |
| [415] | P40337 | Von Hippel-Lindau disease tumor suppressor (Protein G7) (pVHL)                                                                                                                                                      | enzyme binding [GO:0019899]; transcription factor binding [GO:0008134]; ubiquitin protein ligase activity [GO:0061630]; ubiquitin-protein transferase activity [GO:0004842]                                                                                                                                                                                   |
| [416] | Q8N5D0 | WD and tetratricopeptide repeats protein 1                                                                                                                                                                          | enzyme inhibitor activity [GO:0004857]                                                                                                                                                                                                                                                                                                                        |
| [417] | Q9BSK4 | Protein fem-1 homolog A (FEM1a) (FEM1-alpha) (Prostaglandin E receptor 4-associated protein)                                                                                                                        | EP4 subtype prostaglandin E2 receptor binding [GO:0031867]; ubiquitin-protein transferase activity [GO:0004842]                                                                                                                                                                                                                                               |
| [418] | Q15650 | Activating signal cointegrator 1 (ASC-1) (Thyroid receptor-interacting protein 4) (TR-interacting protein 4) (TRIP-4)                                                                                               | estrogen receptor binding [GO:0030331]; histone acetyltransferase binding [GO:0035035]; ligand-dependent nuclear receptor binding [GO:0016922]; protease binding [GO:0002020]; transcription coactivator activity [GO:0003713]; ubiquitin-like protein ligase binding [GO:0044389]; zinc ion binding [GO:0008270]                                             |
| [419] | Q96IC2 | Putative RNA exonuclease NEF-sp (EC 3.1.-.-)                                                                                                                                                                        | exonuclease activity [GO:0004527]; nucleotide binding [GO:0000166]; RNA binding [GO:0003723]                                                                                                                                                                                                                                                                  |
| [420] | Q92626 | Peroxidasin homolog (EC 1.11.1.7) (Melanoma-associated antigen MG50) (Vascular peroxidase 1) (p53-responsive gene 2 protein)                                                                                        | extracellular matrix structural constituent [GO:0005201]; heme binding [GO:0020037]; interleukin-1 receptor antagonist activity [GO:0005152]; metal ion binding [GO:0046872]; peroxidase activity [GO:0004601]                                                                                                                                                |
| [421] | Q9ULT6 | E3 ubiquitin-protein ligase ZNRF3 (EC 6.3.2.-) (RING finger protein 203) (Zinc/RING finger protein 3)                                                                                                               | frizzled binding [GO:0005109]; ligase activity [GO:0016874]; ubiquitin-protein transferase activity [GO:0004842]; zinc ion binding [GO:0008270]                                                                                                                                                                                                               |
| [422] | P00750 | Tissue-type plasminogen activator (t-PA) (t-plasminogen activator) (tPA) (EC 3.4.21.68) (Alteplase) (Retelase) [Cleaved into: Tissue-type plasminogen activator chain A; Tissue-type plasminogen activator chain B] | glycoprotein binding [GO:0001948]; phosphoprotein binding [GO:0051219]; receptor binding [GO:0005102]; serine-type endopeptidase activity [GO:0004252]                                                                                                                                                                                                        |
| [423] | Q07617 | Sperm-associated antigen 1 (HSD-3.8) (Infertility-related sperm protein Spag-1)                                                                                                                                     | GTP binding [GO:0005525]; hydrolase activity [GO:0016787]                                                                                                                                                                                                                                                                                                     |
| [424] | Q96NW4 | Ankyrin repeat domain-containing protein 27 (VPS9 domain-containing protein)                                                                                                                                        | GTPase activator activity [GO:0005096]; guanyl-nucleotide exchange factor activity [GO:0005085]; Rab GTPase binding [GO:0017137]                                                                                                                                                                                                                              |
| [425] | Q9H4K7 | Mitochondrial ribosome-associated GTPase 2 (GTP-binding protein 5) (Protein obg homolog 1) (ObgH1)                                                                                                                  | GTPase activity [GO:0003924]; GTP binding [GO:0005525]; magnesium ion binding [GO:0000287]                                                                                                                                                                                                                                                                    |
| [426] | P62873 | Guanine nucleotide-binding protein G(I)/G(S)/G(T) subunit beta-1 (Transducin beta chain 1)                                                                                                                          | GTPase activity [GO:0003924]; GTPase binding [GO:0051020]; protein complex binding [GO:0032403]; signal transducer activity [GO:0004871]                                                                                                                                                                                                                      |
| [427] | P16520 | Guanine nucleotide-binding protein G(I)/G(S)/G(T) subunit beta-3 (Transducin beta chain 3)                                                                                                                          | GTPase activity [GO:0003924]; GTPase binding [GO:0051020]; signal transducer activity [GO:0004871]                                                                                                                                                                                                                                                            |

|       |        |                                                                                                                                                                                                                                                                                                         |                                                                                                                                                                                                                                                                                                                                                                                                                                                                                                                                                                          |
|-------|--------|---------------------------------------------------------------------------------------------------------------------------------------------------------------------------------------------------------------------------------------------------------------------------------------------------------|--------------------------------------------------------------------------------------------------------------------------------------------------------------------------------------------------------------------------------------------------------------------------------------------------------------------------------------------------------------------------------------------------------------------------------------------------------------------------------------------------------------------------------------------------------------------------|
| [428] | P63218 | Guanine nucleotide-binding protein G(I)/G(S)/G(O) subunit gamma-5                                                                                                                                                                                                                                       | GTPase activity [GO:0003924]; PDZ domain binding [GO:0030165]; signal transducer activity [GO:0004871]                                                                                                                                                                                                                                                                                                                                                                                                                                                                   |
| [429] | P50151 | Guanine nucleotide-binding protein G(I)/G(S)/G(O) subunit gamma-10                                                                                                                                                                                                                                      | GTPase activity [GO:0003924]; signal transducer activity [GO:0004871]                                                                                                                                                                                                                                                                                                                                                                                                                                                                                                    |
| [430] | P63215 | Guanine nucleotide-binding protein G(I)/G(S)/G(O) subunit gamma-3                                                                                                                                                                                                                                       | GTPase activity [GO:0003924]; signal transducer activity [GO:0004871]                                                                                                                                                                                                                                                                                                                                                                                                                                                                                                    |
| [431] | Q9UK08 | Guanine nucleotide-binding protein G(I)/G(S)/G(O) subunit gamma-8 (Gamma-9)                                                                                                                                                                                                                             | GTPase activity [GO:0003924]; signal transducer activity [GO:0004871]                                                                                                                                                                                                                                                                                                                                                                                                                                                                                                    |
| [432] | O14610 | Guanine nucleotide-binding protein G(I)/G(S)/G(O) subunit gamma-T2 (G gamma-C) (G-gamma-8) (G-gamma-9) (Guanine nucleotide binding protein gamma transducing activity polypeptide 2)                                                                                                                    | GTPase activity [GO:0003924]; signal transducer activity [GO:0004871]                                                                                                                                                                                                                                                                                                                                                                                                                                                                                                    |
| [433] | Q6W2J9 | BCL-6 corepressor (BCoR)                                                                                                                                                                                                                                                                                | heat shock protein binding [GO:0031072]; histone deacetylase binding [GO:0042826]; transcription corepressor activity [GO:0003714]; transcription factor binding [GO:0008134]; transcription regulatory region DNA binding [GO:0044212]                                                                                                                                                                                                                                                                                                                                  |
| [434] | P03951 | Coagulation factor XI (FXI) (EC 3.4.21.27) (Plasma thromboplastin antecedent) (PTA) [Cleaved into: Coagulation factor XIa heavy chain; Coagulation factor XIa light chain]                                                                                                                              | heparin binding [GO:0008201]; serine-type endopeptidase activity [GO:0004252]                                                                                                                                                                                                                                                                                                                                                                                                                                                                                            |
| [435] | Q09028 | Histone-binding protein RBBP4 (Chromatin assembly factor 1 subunit C) (CAF-1 subunit C) (Chromatin assembly factor I p48 subunit) (CAF-I 48 kDa subunit) (CAF-I p48) (Nucleosome-remodeling factor subunit RBAP48) (Retinoblastoma-binding protein 4) (RBBP-4) (Retinoblastoma-binding protein p48)     | histone binding [GO:0042393]; histone deacetylase binding [GO:0042826]                                                                                                                                                                                                                                                                                                                                                                                                                                                                                                   |
| [436] | Q6IA86 | Elongator complex protein 2 (ELP2) (SHINC-2) (STAT3-interacting protein 1) (StIP1)                                                                                                                                                                                                                      | histone binding [GO:0042393]; transcriptional repressor activity, RNA polymerase II transcription factor binding [GO:0001191]                                                                                                                                                                                                                                                                                                                                                                                                                                            |
| [437] | Q14526 | Hypermethylated in cancer 1 protein (Hic-1) (Zinc finger and BTB domain-containing protein 29)                                                                                                                                                                                                          | histone deacetylase binding [GO:0042826]; metal ion binding [GO:0046872]; sequence-specific DNA binding [GO:0043565]; transcription factor activity, sequence-specific DNA binding [GO:0003700]                                                                                                                                                                                                                                                                                                                                                                          |
| [438] | Q6ZMT4 | Lysine-specific demethylase 7A (EC 1.14.11.-) (JmjC domain-containing histone demethylation protein 1D) (Lysine-specific demethylase 7)                                                                                                                                                                 | histone demethylase activity (H3-K27 specific) [GO:0071558]; histone demethylase activity (H3-K36 specific) [GO:0051864]; histone demethylase activity (H3-K9 specific) [GO:0032454]; histone demethylase activity (H4-K20 specific) [GO:0035575]; iron ion binding [GO:0005506]; methylated histone binding [GO:0035064]; oxidoreductase activity, acting on paired donors, with incorporation or reduction of molecular oxygen, 2-oxoglutarate as one donor, and incorporation of one atom each of oxygen into both donors [GO:0016706]; zinc ion binding [GO:0008270] |
| [439] | O75164 | Lysine-specific demethylase 4A (EC 1.14.11.-) (JmjC domain-containing histone demethylation protein 3A) (Jumonji domain-containing protein 2A)                                                                                                                                                          | histone demethylase activity (H3-K36 specific) [GO:0051864]; methylated histone binding [GO:0035064]; ubiquitin protein ligase binding [GO:0031625]; zinc ion binding [GO:0008270]                                                                                                                                                                                                                                                                                                                                                                                       |
| [440] | Q6NYC1 | Bifunctional arginine demethylase and lysyl-hydroxylase JMJD6 (EC 1.14.11.-) (Histone arginine demethylase JMJD6) (JmjC domain-containing protein 6) (Jumonji domain-containing protein 6) (Lysyl-hydroxylase JMJD6) (Peptide-lysine 5-dioxygenase JMJD6) (Phosphatidylserine receptor) (Protein PTDSR) | histone demethylase activity (H3-R2 specific) [GO:0033746]; histone demethylase activity (H4-R3 specific) [GO:0033749]; identical protein binding [GO:0042802]; iron ion binding [GO:0005506]; peptidyl-lysine 5-dioxygenase activity [GO:0070815]; receptor activity [GO:0004872]; RNA binding [GO:0003723];                                                                                                                                                                                                                                                            |

|       |        |                                                                                                                                                                                                                                                                                                                                                    |                                                                                                                                                                                                                                                                                          |
|-------|--------|----------------------------------------------------------------------------------------------------------------------------------------------------------------------------------------------------------------------------------------------------------------------------------------------------------------------------------------------------|------------------------------------------------------------------------------------------------------------------------------------------------------------------------------------------------------------------------------------------------------------------------------------------|
|       |        |                                                                                                                                                                                                                                                                                                                                                    | single-stranded RNA binding [GO:0003727]                                                                                                                                                                                                                                                 |
| [441] | Q9BYW2 | Histone-lysine N-methyltransferase SETD2 (EC 2.1.1.43) (HIF-1) (Huntingtin yeast partner B) (Huntingtin-interacting protein 1) (HIP-1) (Huntingtin-interacting protein B) (Lysine N-methyltransferase 3A) (SET domain-containing protein 2) (hSET2) (p231HBP)                                                                                      | histone-lysine N-methyltransferase activity [GO:0018024]; histone methyltransferase activity (H3-K36 specific) [GO:0046975]                                                                                                                                                              |
| [442] | Q9NQV7 | Histone-lysine N-methyltransferase PRDM9 (EC 2.1.1.43) (PR domain zinc finger protein 9) (PR domain-containing protein 9)                                                                                                                                                                                                                          | histone-lysine N-methyltransferase activity [GO:0018024]; metal ion binding [GO:0046872]; nucleic acid binding [GO:0003676]                                                                                                                                                              |
| [443] | Q9BX68 | Histidine triad nucleotide-binding protein 2, mitochondrial (HINT-2) (EC 3.-.-.-) (HINT-3) (HIT-17kDa) (PKCI-1-related HIT protein)                                                                                                                                                                                                                | hydrolase activity [GO:0016787]; nucleotide binding [GO:0000166]                                                                                                                                                                                                                         |
| [444] | P49773 | Histidine triad nucleotide-binding protein 1 (EC 3.-.-.-) (Adenosine 5'-monophosphoramidase) (Protein kinase C inhibitor 1) (Protein kinase C-interacting protein 1) (PKCI-1)                                                                                                                                                                      | hydrolase activity [GO:0016787]; nucleotide binding [GO:0000166]; protein kinase C binding [GO:0005080]                                                                                                                                                                                  |
| [445] | Q9UKR3 | Kallikrein-13 (EC 3.4.21.-) (Kallikrein-like protein 4) (KLK-L4)                                                                                                                                                                                                                                                                                   | hydrolase activity [GO:0016787]; serine-type endopeptidase activity [GO:0004252]                                                                                                                                                                                                         |
| [446] | Q93033 | Immunoglobulin superfamily member 2 (IgSF2) (Cell surface glycoprotein V7) (Glu-Trp-Ile EWI motif-containing protein 101) (EWI-101) (CD antigen CD101)                                                                                                                                                                                             | hydrolase activity, acting on carbon-nitrogen (but not peptide) bonds, in cyclic amides [GO:0016812]                                                                                                                                                                                     |
| [447] | Q9NRW3 | DNA dC->dU-editing enzyme APOBEC-3C (A3C) (EC 3.5.4.-) (APOBEC1-like) (Phorbolin I)                                                                                                                                                                                                                                                                | hydrolase activity, acting on carbon-nitrogen (but not peptide) bonds, in cyclic amidines [GO:0016814]; poly(A) RNA binding [GO:0044822]; zinc ion binding [GO:0008270]                                                                                                                  |
| [448] | Q96AK3 | DNA dC->dU-editing enzyme APOBEC-3D (A3D) (EC 3.5.4.-)                                                                                                                                                                                                                                                                                             | hydrolase activity, acting on carbon-nitrogen (but not peptide) bonds, in cyclic amidines [GO:0016814]; zinc ion binding [GO:0008270]                                                                                                                                                    |
| [449] | Q9HCM9 | E3 ubiquitin-protein ligase TRIM39 (EC 6.3.2.-) (RING finger protein 23) (Testis-abundant finger protein) (Tripartite motif-containing protein 39)                                                                                                                                                                                                 | identical protein binding [GO:0042802]; ligase activity [GO:0016874]; zinc ion binding [GO:0008270]                                                                                                                                                                                      |
| [450] | P61626 | Lysozyme C (EC 3.2.1.17) (1,4-beta-N-acetylmuramidase C)                                                                                                                                                                                                                                                                                           | identical protein binding [GO:0042802]; lysozyme activity [GO:0003796]                                                                                                                                                                                                                   |
| [451] | Q8IUH5 | Palmitoyltransferase ZDHHC17 (EC 2.3.1.225) (Huntingtin yeast partner H) (Huntingtin-interacting protein 14) (HIP-14) (Huntingtin-interacting protein 3) (HIP-3) (Huntingtin-interacting protein H) (Putative MAPK-activating protein PM11) (Putative NF-kappa-B-activating protein 205) (Zinc finger DHHC domain-containing protein 17) (DHHC-17) | identical protein binding [GO:0042802]; magnesium ion transmembrane transporter activity [GO:0015095]; palmitoyltransferase activity [GO:0016409]; protein-cysteine S-palmitoyltransferase activity [GO:0019706]; signal transducer activity [GO:0004871]; zinc ion binding [GO:0008270] |
| [452] | Q9BV20 | Methylthioribose-1-phosphate isomerase (M1Pi) (MTR-1-P isomerase) (EC 5.3.1.23) (Mediator of RhoA-dependent invasion) (S-methyl-5-thioribose-1-phosphate isomerase) (Translation initiation factor eIF-2B subunit alpha/beta/delta-like protein)                                                                                                   | identical protein binding [GO:0042802]; S-methyl-5-thioribose-1-phosphate isomerase activity [GO:0046523]                                                                                                                                                                                |
| [453] | O95863 | Zinc finger protein SNAI1 (Protein snail homolog 1) (Protein sna)                                                                                                                                                                                                                                                                                  | kinase binding [GO:0019900]; metal ion binding [GO:0046872]; RNA polymerase II regulatory region sequence-specific DNA binding [GO:0000977]; transcriptional repressor activity, RNA polymerase II core promoter proximal region sequence-specific binding [GO:0001078]                  |
| [454] | Q9Y577 | E3 ubiquitin-protein ligase TRIM17 (EC 6.3.2.-) (RING finger protein 16) (Testis RING finger protein) (Tripartite motif-containing protein 17)                                                                                                                                                                                                     | ligase activity [GO:0016874]; protein binding, bridging [GO:0030674]; ubiquitin-protein transferase activity [GO:0004842]; zinc ion binding [GO:0008270]                                                                                                                                 |
| [455] | Q8IYU2 | E3 ubiquitin-protein ligase HACE1 (EC 6.3.2.-) (HECT domain and ankyrin repeat-containing E3 ubiquitin-protein ligase 1)                                                                                                                                                                                                                           | ligase activity [GO:0016874]; Rab GTPase binding [GO:0017137]; Rac GTPase binding [GO:0048365]; ubiquitin-protein transferase activity [GO:0004842]                                                                                                                                      |

|       |        |                                                                                                                                                                                                                                    |                                                                                                                                                                                                           |
|-------|--------|------------------------------------------------------------------------------------------------------------------------------------------------------------------------------------------------------------------------------------|-----------------------------------------------------------------------------------------------------------------------------------------------------------------------------------------------------------|
| [456] | O95071 | E3 ubiquitin-protein ligase UBR5 (EC 6.3.2.-) (E3 ubiquitin-protein ligase, HECT domain-containing 1) (Hyperplastic discs protein homolog) (hHYD) (Progesterin-induced protein)                                                    | ligase activity [GO:0016874]; RNA binding [GO:0003723]; ubiquitin-protein transferase activity [GO:0004842]; ubiquitin-ubiquitin ligase activity [GO:0034450]; zinc ion binding [GO:0008270]              |
| [457] | Q96AX9 | E3 ubiquitin-protein ligase MIB2 (EC 6.3.2.-) (Mind bomb homolog 2) (Novel zinc finger protein) (Novelzin) (Putative NF-kappa-B-activating protein 002N) (Skeletrophin) (Zinc finger ZZ type with ankyrin repeat domain protein 1) | ligase activity [GO:0016874]; signal transducer activity [GO:0004871]; ubiquitin protein ligase activity [GO:0061630]; ubiquitin-protein transferase activity [GO:0004842]; zinc ion binding [GO:0008270] |
| [458] | Q9Y297 | F-box/WD repeat-containing protein 1A (E3RSIkappaB) (Epididymis tissue protein Li 2a) (F-box and WD repeats protein beta-TrCP) (pIkappaBalpha-E3 receptor subunit)                                                                 | ligase activity [GO:0016874]; ubiquitin protein ligase activity [GO:0061630]                                                                                                                              |
| [459] | Q9Y4L5 | E3 ubiquitin-protein ligase RNF115 (EC 6.3.2.-) (RING finger protein 115) (Rabring 7) (Zinc finger protein 364)                                                                                                                    | ligase activity [GO:0016874]; ubiquitin protein ligase activity [GO:0061630]; ubiquitin-protein transferase activity [GO:0004842]; zinc ion binding [GO:0008270]                                          |
| [460] | O43567 | E3 ubiquitin-protein ligase RNF13 (EC 6.3.2.-) (RING finger protein 13)                                                                                                                                                            | ligase activity [GO:0016874]; ubiquitin protein ligase activity [GO:0061630]; ubiquitin-protein transferase activity [GO:0004842]; zinc ion binding [GO:0008270]                                          |
| [461] | Q8NHY2 | E3 ubiquitin-protein ligase RFWD2 (EC 6.3.2.-) (Constitutive photomorphogenesis protein 1 homolog) (hCOP1) (RING finger and WD repeat domain protein 2) (RING finger protein 200)                                                  | ligase activity [GO:0016874]; ubiquitin protein ligase activity [GO:0061630]; zinc ion binding [GO:0008270]                                                                                               |
| [462] | Q9BV68 | E3 ubiquitin-protein ligase RNF126 (EC 6.3.2.-) (RING finger protein 126)                                                                                                                                                          | ligase activity [GO:0016874]; ubiquitin protein ligase activity [GO:0061630]; zinc ion binding [GO:0008270]                                                                                               |
| [463] | Q8TEB7 | E3 ubiquitin-protein ligase RNF128 (EC 6.3.2.-) (Gene related to anergy in lymphocytes protein) (GRAIL) (RING finger protein 128)                                                                                                  | ligase activity [GO:0016874]; ubiquitin protein ligase activity [GO:0061630]; zinc ion binding [GO:0008270]                                                                                               |
| [464] | Q8NC42 | E3 ubiquitin-protein ligase RNF149 (EC 6.3.2.-) (DNA polymerase-transactivated protein 2) (RING finger protein 149)                                                                                                                | ligase activity [GO:0016874]; ubiquitin protein ligase activity [GO:0061630]; zinc ion binding [GO:0008270]                                                                                               |
| [465] | Q96F44 | E3 ubiquitin-protein ligase TRIM11 (EC 6.3.2.-) (Protein BIA1) (RING finger protein 92) (Tripartite motif-containing protein 11)                                                                                                   | ligase activity [GO:0016874]; ubiquitin protein ligase activity [GO:0061630]; zinc ion binding [GO:0008270]                                                                                               |
| [466] | Q86YT6 | E3 ubiquitin-protein ligase MIB1 (EC 6.3.2.-) (DAPK-interacting protein 1) (DIP-1) (Mind bomb homolog 1) (Zinc finger ZZ type with ankyrin repeat domain protein 2)                                                                | ligase activity [GO:0016874]; ubiquitin-protein transferase activity [GO:0004842]; zinc ion binding [GO:0008270]                                                                                          |
| [467] | Q86XS8 | E3 ubiquitin-protein ligase RNF130 (EC 6.3.2.-) (Goliath homolog) (H-Goliath) (RING finger protein 130)                                                                                                                            | ligase activity [GO:0016874]; ubiquitin-protein transferase activity [GO:0004842]; zinc ion binding [GO:0008270]                                                                                          |
| [468] | Q9P0P0 | E3 ubiquitin-protein ligase RNF181 (EC 6.3.2.-) (RING finger protein 181)                                                                                                                                                          | ligase activity [GO:0016874]; ubiquitin-protein transferase activity [GO:0004842]; zinc ion binding [GO:0008270]                                                                                          |
| [469] | Q9H0F5 | E3 ubiquitin-protein ligase RNF38 (EC 6.3.2.-) (RING finger protein 38)                                                                                                                                                            | ligase activity [GO:0016874]; ubiquitin-protein transferase activity [GO:0004842]; zinc ion binding [GO:0008270]                                                                                          |
| [470] | Q6Q0C0 | E3 ubiquitin-protein ligase TRAF7 (EC 6.3.2.-) (RING finger and WD repeat-containing protein 1) (RING finger protein 119) (TNF receptor-associated factor 7)                                                                       | ligase activity [GO:0016874]; ubiquitin-protein transferase activity [GO:0004842]; zinc ion binding [GO:0008270]                                                                                          |
| [471] | Q8WVZ7 | E3 ubiquitin-protein ligase RNF133 (EC 6.3.2.-) (RING finger protein 133)                                                                                                                                                          | ligase activity [GO:0016874]; zinc ion binding [GO:0008270]                                                                                                                                               |
| [472] | Q13434 | Putative E3 ubiquitin-protein ligase makorin-4 (EC 6.3.2.-) (Makorin RING finger protein pseudogene 4) (Makorin RING finger protein pseudogene 5) (RING finger protein 64) (Zinc finger protein 127-                               | ligase activity [GO:0016874]; zinc ion binding [GO:0008270]                                                                                                                                               |

|       |        |                                                                                                                                                                                                                                                                                                                |                                                                                                                                                                                                                                                                                                                                                         |
|-------|--------|----------------------------------------------------------------------------------------------------------------------------------------------------------------------------------------------------------------------------------------------------------------------------------------------------------------|---------------------------------------------------------------------------------------------------------------------------------------------------------------------------------------------------------------------------------------------------------------------------------------------------------------------------------------------------------|
|       |        | Xp) (ZNF127-Xp) (Zinc finger protein 127-like 1)                                                                                                                                                                                                                                                               |                                                                                                                                                                                                                                                                                                                                                         |
| [473] | Q8IUH4 | Palmitoyltransferase ZDHHC13 (EC 2.3.1.225) (Huntingtin-interacting protein 14-related protein) (HIP14-related protein) (Huntingtin-interacting protein HIP3RP) (Putative MAPK-activating protein PM03) (Putative NF-kappa-B-activating protein 209) (Zinc finger DHHC domain-containing protein 13) (DHHC-13) | magnesium ion transmembrane transporter activity [GO:0015095]; palmitoyltransferase activity [GO:0016409]; protein-cysteine S-palmitoyltransferase activity [GO:0019706]; signal transducer activity [GO:0004871]; zinc ion binding [GO:0008270]                                                                                                        |
| [474] | Q8IWT0 | Protein archease (Protein ZBTB8OS) (Zinc finger and BTB domain-containing opposite strand protein 8)                                                                                                                                                                                                           | metal ion binding [GO:0046872]                                                                                                                                                                                                                                                                                                                          |
| [475] | P57071 | PR domain zinc finger protein 15 (EC 2.1.1.-) (PR domain-containing protein 15) (Zinc finger protein 298)                                                                                                                                                                                                      | metal ion binding [GO:0046872]; methyltransferase activity [GO:0008168]; RNA polymerase II regulatory region sequence-specific DNA binding [GO:0000977]; transcription factor activity, sequence-specific DNA binding [GO:0003700]                                                                                                                      |
| [476] | Q8NCW5 | NAD(P)H-hydrate epimerase (EC 5.1.99.6) (Apolipoprotein A-I-binding protein) (AI-BP) (NAD(P)HX epimerase) (YjeF N-terminal domain-containing protein 1) (YjeF_N1)                                                                                                                                              | metal ion binding [GO:0046872]; NADHX epimerase activity [GO:0052856]; NADPHX epimerase activity [GO:0052857]; nucleotide binding [GO:0000166]                                                                                                                                                                                                          |
| [477] | Q96SL8 | Flt3-interacting zinc finger protein 1 (Zinc finger protein 798)                                                                                                                                                                                                                                               | metal ion binding [GO:0046872]; nucleic acid binding [GO:0003676]; receptor tyrosine kinase binding [GO:0030971]                                                                                                                                                                                                                                        |
| [478] | Q9P2R3 | Rabankyrin-5 (Rank-5) (Ankyrin repeat and FYVE domain-containing protein 1) (Ankyrin repeats hooked to a zinc finger motif)                                                                                                                                                                                    | metal ion binding [GO:0046872]; phosphatidylinositol phosphate binding [GO:1901981]; Rab GTPase binding [GO:0017137]                                                                                                                                                                                                                                    |
| [479] | O60346 | PH domain leucine-rich repeat-containing protein phosphatase 1 (EC 3.1.3.16) (Pleckstrin homology domain-containing family E member 1) (PH domain-containing family E member 1) (Suprachiasmatic nucleus circadian oscillatory protein) (hSCOP)                                                                | metal ion binding [GO:0046872]; phosphoprotein phosphatase activity [GO:0004721]                                                                                                                                                                                                                                                                        |
| [480] | P29083 | General transcription factor IIE subunit 1 (General transcription factor IIE 56 kDa subunit) (Transcription initiation factor IIE subunit alpha) (TFIIE-alpha)                                                                                                                                                 | metal ion binding [GO:0046872]; RNA polymerase II core binding [GO:0000993]; sequence-specific DNA binding [GO:0043565]; TFIIEH-class transcription factor binding [GO:0001097]; transcription factor activity, core RNA polymerase II binding [GO:0000991]; transcription factor activity, RNA polymerase II transcription factor binding [GO:0001076] |
| [481] | Q6ZN08 | Putative zinc finger protein 66 (Zinc finger protein 66 pseudogene)                                                                                                                                                                                                                                            | metal ion binding [GO:0046872]; RNA polymerase II core promoter proximal region sequence-specific DNA binding [GO:0000978]                                                                                                                                                                                                                              |
| [482] | Q6ZMV8 | Putative zinc finger protein 730                                                                                                                                                                                                                                                                               | metal ion binding [GO:0046872]; RNA polymerase II core promoter proximal region sequence-specific DNA binding [GO:0000978]                                                                                                                                                                                                                              |
| [483] | O43296 | Zinc finger protein 264                                                                                                                                                                                                                                                                                        | metal ion binding [GO:0046872]; RNA polymerase II core promoter proximal region sequence-specific DNA binding [GO:0000978]                                                                                                                                                                                                                              |
| [484] | Q9H8G1 | Zinc finger protein 430                                                                                                                                                                                                                                                                                        | metal ion binding [GO:0046872]; RNA polymerase II core promoter proximal region sequence-specific DNA binding [GO:0000978]                                                                                                                                                                                                                              |
| [485] | Q14592 | Zinc finger protein 460 (Zinc finger protein 272) (Zinc finger protein HZF8)                                                                                                                                                                                                                                   | metal ion binding [GO:0046872]; RNA polymerase II core promoter proximal region sequence-specific DNA binding [GO:0000978]                                                                                                                                                                                                                              |
| [486] | Q96JC4 | Zinc finger protein 479 (Zinc finger protein Kr19) (HKr19)                                                                                                                                                                                                                                                     | metal ion binding [GO:0046872]; RNA polymerase II core promoter proximal region sequence-specific DNA binding [GO:0000978]                                                                                                                                                                                                                              |
| [487] | Q96H40 | Zinc finger protein 486 (KRAB domain only protein 2)                                                                                                                                                                                                                                                           | metal ion binding [GO:0046872]; RNA polymerase II core promoter proximal region                                                                                                                                                                                                                                                                         |

|       |        |                                                                                                                                                                             |                                                                                                                                                                                                                                                                                                                                                                                                                                                                                                |
|-------|--------|-----------------------------------------------------------------------------------------------------------------------------------------------------------------------------|------------------------------------------------------------------------------------------------------------------------------------------------------------------------------------------------------------------------------------------------------------------------------------------------------------------------------------------------------------------------------------------------------------------------------------------------------------------------------------------------|
|       |        |                                                                                                                                                                             | sequence-specific DNA binding [GO:0000978]                                                                                                                                                                                                                                                                                                                                                                                                                                                     |
| [488] | Q9P255 | Zinc finger protein 492 (Zinc finger protein 115)                                                                                                                           | metal ion binding [GO:0046872]; RNA polymerase II core promoter proximal region sequence-specific DNA binding [GO:0000978]                                                                                                                                                                                                                                                                                                                                                                     |
| [489] | Q5JVG8 | Zinc finger protein 506                                                                                                                                                     | metal ion binding [GO:0046872]; RNA polymerase II core promoter proximal region sequence-specific DNA binding [GO:0000978]                                                                                                                                                                                                                                                                                                                                                                     |
| [490] | Q08ER8 | Zinc finger protein 543                                                                                                                                                     | metal ion binding [GO:0046872]; RNA polymerase II core promoter proximal region sequence-specific DNA binding [GO:0000978]                                                                                                                                                                                                                                                                                                                                                                     |
| [491] | Q68DY1 | Zinc finger protein 626                                                                                                                                                     | metal ion binding [GO:0046872]; RNA polymerase II core promoter proximal region sequence-specific DNA binding [GO:0000978]                                                                                                                                                                                                                                                                                                                                                                     |
| [492] | Q8N3J9 | Zinc finger protein 664 (Zinc finger protein 176) (Zinc finger protein from organ of Corti)                                                                                 | metal ion binding [GO:0046872]; RNA polymerase II core promoter proximal region sequence-specific DNA binding [GO:0000978]                                                                                                                                                                                                                                                                                                                                                                     |
| [493] | Q8N7Q3 | Zinc finger protein 676                                                                                                                                                     | metal ion binding [GO:0046872]; RNA polymerase II core promoter proximal region sequence-specific DNA binding [GO:0000978]                                                                                                                                                                                                                                                                                                                                                                     |
| [494] | Q8NEM1 | Zinc finger protein 680                                                                                                                                                     | metal ion binding [GO:0046872]; RNA polymerase II core promoter proximal region sequence-specific DNA binding [GO:0000978]                                                                                                                                                                                                                                                                                                                                                                     |
| [495] | O95780 | Zinc finger protein 682                                                                                                                                                     | metal ion binding [GO:0046872]; RNA polymerase II core promoter proximal region sequence-specific DNA binding [GO:0000978]                                                                                                                                                                                                                                                                                                                                                                     |
| [496] | P17019 | Zinc finger protein 708 (Zinc finger protein 15) (Zinc finger protein 15-like 1) (Zinc finger protein KOX8)                                                                 | metal ion binding [GO:0046872]; RNA polymerase II core promoter proximal region sequence-specific DNA binding [GO:0000978]                                                                                                                                                                                                                                                                                                                                                                     |
| [497] | Q96N38 | Zinc finger protein 714                                                                                                                                                     | metal ion binding [GO:0046872]; RNA polymerase II core promoter proximal region sequence-specific DNA binding [GO:0000978]                                                                                                                                                                                                                                                                                                                                                                     |
| [498] | O75373 | Zinc finger protein 737 (Zinc finger protein 102)                                                                                                                           | metal ion binding [GO:0046872]; RNA polymerase II core promoter proximal region sequence-specific DNA binding [GO:0000978]                                                                                                                                                                                                                                                                                                                                                                     |
| [499] | Q5CZA5 | Zinc finger protein 805                                                                                                                                                     | metal ion binding [GO:0046872]; RNA polymerase II core promoter proximal region sequence-specific DNA binding [GO:0000978]                                                                                                                                                                                                                                                                                                                                                                     |
| [500] | Q9H116 | GDNF-inducible zinc finger protein 1 (Zinc finger and BTB domain-containing protein 23) (Zinc finger protein 336)                                                           | metal ion binding [GO:0046872]; RNA polymerase II core promoter proximal region sequence-specific DNA binding [GO:0000978]; RNA polymerase II distal enhancer sequence-specific DNA binding [GO:0000980]; sequence-specific DNA binding [GO:0043565]; transcriptional repressor activity, RNA polymerase II core promoter proximal region sequence-specific binding [GO:0001078]; transcriptional repressor activity, RNA polymerase II distal enhancer sequence-specific binding [GO:0001206] |
| [501] | Q9UK33 | Zinc finger protein 580 (LDL-induced EC protein)                                                                                                                            | metal ion binding [GO:0046872]; RNA polymerase II regulatory region sequence-specific DNA binding [GO:0000977]                                                                                                                                                                                                                                                                                                                                                                                 |
| [502] | O43829 | Zinc finger and BTB domain-containing protein 14 (Zinc finger protein 161 homolog) (Zfp-161) (Zinc finger protein 478) (Zinc finger protein 5 homolog) (ZF5) (Zfp-5) (hZF5) | metal ion binding [GO:0046872]; RNA polymerase II regulatory region sequence-specific DNA binding [GO:0000977]; sequence-specific DNA binding [GO:0043565]; transcription factor activity, sequence-specific DNA binding [GO:0003700]; transcription regulatory region DNA binding [GO:0044212]                                                                                                                                                                                                |
| [503] | P17040 | Zinc finger and SCAN domain-containing protein 20 (Zinc finger protein 31) (Zinc finger protein 360) (Zinc finger protein KOX29)                                            | metal ion binding [GO:0046872]; RNA polymerase II regulatory region sequence-specific DNA binding [GO:0000977]; transcription factor activity, sequence-specific DNA binding                                                                                                                                                                                                                                                                                                                   |

|       |        |                                                                                                                                           |                                                                                                                                                                                           |
|-------|--------|-------------------------------------------------------------------------------------------------------------------------------------------|-------------------------------------------------------------------------------------------------------------------------------------------------------------------------------------------|
|       |        |                                                                                                                                           | [GO:0003700]                                                                                                                                                                              |
| [504] | Q9HCX3 | Zinc finger protein 304                                                                                                                   | metal ion binding [GO:0046872]; RNA polymerase II regulatory region sequence-specific DNA binding [GO:0000977]; transcription factor activity, sequence-specific DNA binding [GO:0003700] |
| [505] | Q96HQ0 | Zinc finger protein 419                                                                                                                   | metal ion binding [GO:0046872]; RNA polymerase II regulatory region sequence-specific DNA binding [GO:0000977]; transcription factor activity, sequence-specific DNA binding [GO:0003700] |
| [506] | Q96NI8 | Zinc finger protein 570                                                                                                                   | metal ion binding [GO:0046872]; RNA polymerase II regulatory region sequence-specific DNA binding [GO:0000977]; transcription factor activity, sequence-specific DNA binding [GO:0003700] |
| [507] | Q96ND8 | Zinc finger protein 583 (Zinc finger protein L3-5)                                                                                        | metal ion binding [GO:0046872]; RNA polymerase II regulatory region sequence-specific DNA binding [GO:0000977]; transcription factor activity, sequence-specific DNA binding [GO:0003700] |
| [508] | Q6AZW8 | Zinc finger protein 660                                                                                                                   | metal ion binding [GO:0046872]; RNA polymerase II regulatory region sequence-specific DNA binding [GO:0000977]; transcription factor activity, sequence-specific DNA binding [GO:0003700] |
| [509] | Q5VV52 | Zinc finger protein 691                                                                                                                   | metal ion binding [GO:0046872]; RNA polymerase II regulatory region sequence-specific DNA binding [GO:0000977]; transcription factor activity, sequence-specific DNA binding [GO:0003700] |
| [510] | Q68DY9 | Zinc finger protein 772                                                                                                                   | metal ion binding [GO:0046872]; RNA polymerase II regulatory region sequence-specific DNA binding [GO:0000977]; transcription factor activity, sequence-specific DNA binding [GO:0003700] |
| [511] | Q3KQV3 | Zinc finger protein 792                                                                                                                   | metal ion binding [GO:0046872]; RNA polymerase II regulatory region sequence-specific DNA binding [GO:0000977]; transcription factor activity, sequence-specific DNA binding [GO:0003700] |
| [512] | P08048 | Zinc finger Y-chromosomal protein                                                                                                         | metal ion binding [GO:0046872]; RNA polymerase II regulatory region sequence-specific DNA binding [GO:0000977]; transcription factor activity, sequence-specific DNA binding [GO:0003700] |
| [513] | P05156 | Complement factor I (EC 3.4.21.45) (C3B/C4B inactivator) [Cleaved into: Complement factor I heavy chain; Complement factor I light chain] | metal ion binding [GO:0046872]; scavenger receptor activity [GO:0005044]; serine-type endopeptidase activity [GO:0004252]                                                                 |
| [514] | Q9UNI1 | Chymotrypsin-like elastase family member 1 (EC 3.4.21.36) (Elastase-1) (Pancreatic elastase 1)                                            | metal ion binding [GO:0046872]; serine-type endopeptidase activity [GO:0004252]                                                                                                           |
| [515] | P06681 | Complement C2 (EC 3.4.21.43) (C3/C5 convertase) [Cleaved into: Complement C2b fragment; Complement C2a fragment]                          | metal ion binding [GO:0046872]; serine-type endopeptidase activity [GO:0004252]                                                                                                           |
| [516] | Q7RTY7 | Ovochymase-1 (EC 3.4.21.-)                                                                                                                | metal ion binding [GO:0046872]; serine-type endopeptidase activity [GO:0004252]                                                                                                           |
| [517] | Q7RTZ1 | Ovochymase-2 (EC 3.4.21.-) (Oviductin)                                                                                                    | metal ion binding [GO:0046872]; serine-type endopeptidase activity [GO:0004252]                                                                                                           |
| [518] | Q8NHM4 | Putative trypsin-6 (EC 3.4.21.4) (Serine protease 3 pseudogene 2) (Trypsinogen C)                                                         | metal ion binding [GO:0046872]; serine-type endopeptidase activity [GO:0004252]                                                                                                           |
| [519] | P07477 | Trypsin-1 (EC 3.4.21.4) (Beta-trypsin) (Cationic trypsinogen) (Serine protease 1) (Trypsin I)                                             | metal ion binding [GO:0046872]; serine-type endopeptidase activity [GO:0004252]                                                                                                           |

|       |        |                                                                                                                                                                                                                                                                            |                                                                                                                                           |
|-------|--------|----------------------------------------------------------------------------------------------------------------------------------------------------------------------------------------------------------------------------------------------------------------------------|-------------------------------------------------------------------------------------------------------------------------------------------|
|       |        | [Cleaved into: Alpha-trypsin chain 1; Alpha-trypsin chain 2]                                                                                                                                                                                                               |                                                                                                                                           |
| [520] | Q9Y5K2 | Kallikrein-4 (EC 3.4.21.-) (Enamel matrix serine proteinase 1) (Kallikrein-like protein 1) (KLK-L1) (Prostase) (Serine protease 17)                                                                                                                                        | metal ion binding [GO:0046872]; serine-type endopeptidase activity [GO:0004252]; serine-type peptidase activity [GO:0008236]              |
| [521] | Q99549 | M-phase phosphoprotein 8 (Two hybrid-associated protein 3 with RanBPM) (Twa3)                                                                                                                                                                                              | methylated histone binding [GO:0035064]                                                                                                   |
| [522] | Q8N3J2 | Methyltransferase-like protein 4 (EC 2.1.1.-)                                                                                                                                                                                                                              | methyltransferase activity [GO:0008168]; nucleic acid binding [GO:0003676]                                                                |
| [523] | P00748 | Coagulation factor XII (EC 3.4.21.38) (Hageman factor) (HAF) [Cleaved into: Coagulation factor XIIa heavy chain; Beta-factor XIIa part 1; Coagulation factor XIIa light chain (Beta-factor XIIa part 2)]                                                                   | misfolded protein binding [GO:0051787]; serine-type aminopeptidase activity [GO:0070009]; serine-type endopeptidase activity [GO:0004252] |
| [524] | O95271 | Tankyrase-1 (TANK1) (EC 2.4.2.30) (ADP-ribosyltransferase diphtheria toxin-like 5) (ARTD5) (Poly [ADP-ribose] polymerase 5A) (TNKS-1) (TRF1-interacting ankyrin-related ADP-ribose polymerase) (Tankyrase I)                                                               | NAD+ ADP-ribosyltransferase activity [GO:0003950]; zinc ion binding [GO:0008270]                                                          |
| [525] | Q9P0M2 | A-kinase anchor protein 7 isoform gamma (AKAP-7 isoform gamma) (A-kinase anchor protein 18 kDa) (AKAP 18) (Protein kinase A-anchoring protein 7 isoform gamma) (PRKA7 isoform gamma)                                                                                       | nucleotide binding [GO:0000166]; protein kinase A binding [GO:0051018]                                                                    |
| [526] | Q9ULH0 | Kinase D-interacting substrate of 220 kDa (Ankyrin repeat-rich membrane-spanning protein)                                                                                                                                                                                  | PDZ domain binding [GO:0030165]; protein kinase regulator activity [GO:0019887]                                                           |
| [527] | Q2TV78 | Putative macrophage stimulating 1-like protein (Brain rescue factor 1) (BRF-1) (Hepatocyte growth factor-like protein homolog)                                                                                                                                             | peptidase activity [GO:0008233]                                                                                                           |
| [528] | Q9H3S3 | Transmembrane protease serine 5 (EC 3.4.21.-) (Spinesin)                                                                                                                                                                                                                   | peptidase activity [GO:0008233]; scavenger receptor activity [GO:0005044]; serine-type endopeptidase activity [GO:0004252]                |
| [529] | Q99895 | Chymotrypsin-C (EC 3.4.21.2) (Caldecrin)                                                                                                                                                                                                                                   | peptidase activity [GO:0008233]; serine-type endopeptidase activity [GO:0004252]                                                          |
| [530] | P08861 | Chymotrypsin-like elastase family member 3B (EC 3.4.21.70) (Elastase IIIB) (Elastase-3B) (Protease E)                                                                                                                                                                      | peptidase activity [GO:0008233]; serine-type endopeptidase activity [GO:0004252]                                                          |
| [531] | O60235 | Transmembrane protease serine 11D (EC 3.4.21.-) (Airway trypsin-like protease) [Cleaved into: Transmembrane protease serine 11D non-catalytic chain; Transmembrane protease serine 11D catalytic chain]                                                                    | peptidase activity [GO:0008233]; serine-type endopeptidase activity [GO:0004252]                                                          |
| [532] | Q9UKR0 | Kallikrein-12 (EC 3.4.21.-) (Kallikrein-like protein 5) (KLK-L5)                                                                                                                                                                                                           | peptidase activity [GO:0008233]; serine-type endopeptidase activity [GO:0004252]; serine-type peptidase activity [GO:0008236]             |
| [533] | Q9Y337 | Kallikrein-5 (EC 3.4.21.-) (Kallikrein-like protein 2) (KLK-L2) (Stratum corneum tryptic enzyme)                                                                                                                                                                           | peptidase activity [GO:0008233]; serine-type endopeptidase activity [GO:0004252]; serine-type peptidase activity [GO:0008236]             |
| [534] | P49862 | Kallikrein-7 (hK7) (EC 3.4.21.117) (Serine protease 6) (Stratum corneum chymotryptic enzyme) (hSCCE)                                                                                                                                                                       | peptidase activity [GO:0008233]; serine-type endopeptidase activity [GO:0004252]; serine-type peptidase activity [GO:0008236]             |
| [535] | P55199 | RNA polymerase II elongation factor ELL (Eleven-nineteen lysine-rich leukemia protein)                                                                                                                                                                                     | phosphatase binding [GO:0019902]                                                                                                          |
| [536] | O60733 | 85/88 kDa calcium-independent phospholipase A2 (CaI-PLA2) (EC 3.1.1.4) (Group VI phospholipase A2) (GVI PLA2) (Intracellular membrane-associated calcium-independent phospholipase A2 beta) (iPLA2-beta) (Patatin-like phospholipase domain-containing protein 9) (PNPLA9) | phospholipase A2 activity [GO:0004623]                                                                                                    |
| [537] | Q92636 | Protein FAN (Factor associated with neutral sphingomyelinase activation) (Factor associated with N-SMase activation)                                                                                                                                                       | phospholipid binding [GO:0005543]; receptor signaling protein activity [GO:0005057]                                                       |



|       |        |                                                                                                                                                                                                           |                                                                                                                                                                                                                                                                                                                                                                                                                                                    |
|-------|--------|-----------------------------------------------------------------------------------------------------------------------------------------------------------------------------------------------------------|----------------------------------------------------------------------------------------------------------------------------------------------------------------------------------------------------------------------------------------------------------------------------------------------------------------------------------------------------------------------------------------------------------------------------------------------------|
| [538] | Q9Y4P3 | Transducin beta-like protein 2 (WS beta-transducin repeats protein) (WS-betaTRP) (Williams-Beuren syndrome chromosomal region 13 protein)                                                                 | phosphoprotein binding [GO:0051219]; poly(A) RNA binding [GO:0044822]; protein kinase binding [GO:0019901]; translation initiation factor binding [GO:0031369]                                                                                                                                                                                                                                                                                     |
| [539] | O95163 | Elongator complex protein 1 (ELP1) (IkappaB kinase complex-associated protein) (IKK complex-associated protein) (p150)                                                                                    | phosphorylase kinase regulator activity [GO:0008607]; signal transducer activity [GO:0004871]                                                                                                                                                                                                                                                                                                                                                      |
| [540] | P0CG48 | Polyubiquitin-C [Cleaved into: Ubiquitin]                                                                                                                                                                 | poly(A) RNA binding [GO:0044822]; protease binding [GO:0002020]                                                                                                                                                                                                                                                                                                                                                                                    |
| [541] | Q16625 | Occludin                                                                                                                                                                                                  | protein domain specific binding [GO:0019904]; thiopurine S-methyltransferase activity [GO:0008119]                                                                                                                                                                                                                                                                                                                                                 |
| [542] | P12544 | Granzyme A (EC 3.4.21.78) (CTL tryptase) (Cytotoxic T-lymphocyte proteinase 1) (Fragmentin-1) (Granzyme-1) (Hanukkah factor) (H factor) (HF)                                                              | protein homodimerization activity [GO:0042803]; serine-type endopeptidase activity [GO:0004252]                                                                                                                                                                                                                                                                                                                                                    |
| [543] | Q8N1B3 | Cyclin-related protein FAM58A (CDK10-activating cyclin) (Cyclin-M)                                                                                                                                        | protein kinase activator activity [GO:0030295]                                                                                                                                                                                                                                                                                                                                                                                                     |
| [544] | Q6NXT1 | Ankyrin repeat domain-containing protein 54 (Lyn-interacting ankyrin repeat protein)                                                                                                                      | protein kinase regulator activity [GO:0019887]                                                                                                                                                                                                                                                                                                                                                                                                     |
| [545] | Q9UJX4 | Anaphase-promoting complex subunit 5 (APC5) (Cyclosome subunit 5)                                                                                                                                         | protein phosphatase binding [GO:0019903]                                                                                                                                                                                                                                                                                                                                                                                                           |
| [546] | Q96I34 | Protein phosphatase 1 regulatory subunit 16A (Myosin phosphatase-targeting subunit 3)                                                                                                                     | protein phosphatase type 1 regulator activity [GO:0008599]                                                                                                                                                                                                                                                                                                                                                                                         |
| [547] | Q3MIX3 | Uncharacterized aarF domain-containing protein kinase 5 (EC 2.7.11.-)                                                                                                                                     | protein serine/threonine kinase activity [GO:0004674]                                                                                                                                                                                                                                                                                                                                                                                              |
| [548] | Q15306 | Interferon regulatory factor 4 (IRF-4) (Lymphocyte-specific interferon regulatory factor) (LSIRF) (Multiple myeloma oncogene 1) (NF-EM5)                                                                  | protein-lysine N-methyltransferase activity [GO:0016279]; RNA polymerase II core promoter proximal region sequence-specific DNA binding [GO:0000978]; sequence-specific DNA binding [GO:0043565]; transcriptional activator activity, RNA polymerase II core promoter proximal region sequence-specific binding [GO:0001077]; transcription factor activity, sequence-specific DNA binding [GO:0003700]; transcription factor binding [GO:0008134] |
| [549] | Q8TDJ6 | DmX-like protein 2 (Rabconnectin-3)                                                                                                                                                                       | Rab GTPase binding [GO:0017137]                                                                                                                                                                                                                                                                                                                                                                                                                    |
| [550] | Q96LT7 | Protein C9orf72                                                                                                                                                                                           | Rab GTPase binding [GO:0017137]                                                                                                                                                                                                                                                                                                                                                                                                                    |
| [551] | Q02556 | Interferon regulatory factor 8 (IRF-8) (Interferon consensus sequence-binding protein) (H-ICSBP) (ICSBP)                                                                                                  | regulatory region DNA binding [GO:0000975]; transcription factor activity, RNA polymerase II distal enhancer sequence-specific binding [GO:0003705]                                                                                                                                                                                                                                                                                                |
| [552] | Q16576 | Histone-binding protein RBBP7 (Histone acetyltransferase type B subunit 2) (Nucleosome-remodeling factor subunit RBAP46) (Retinoblastoma-binding protein 7) (RBBP-7) (Retinoblastoma-binding protein p46) | RNA binding [GO:0003723]                                                                                                                                                                                                                                                                                                                                                                                                                           |
| [553] | Q03938 | Zinc finger protein 90 (Zinc finger protein HTF9)                                                                                                                                                         | RNA polymerase II core promoter proximal region sequence-specific DNA binding [GO:0000978]; transcription factor activity, sequence-specific DNA binding [GO:0003700]; zinc ion binding [GO:0008270]                                                                                                                                                                                                                                               |
| [554] | Q9Y3C7 | Mediator of RNA polymerase II transcription subunit 31 (Mediator complex subunit 31) (Mediator complex subunit SOH1) (hSOH1)                                                                              | RNA polymerase II transcription cofactor activity [GO:0001104]; transcription coactivator activity [GO:0003713]; ubiquitin protein ligase activity [GO:0061630]                                                                                                                                                                                                                                                                                    |
| [555] | Q9BYE2 | Transmembrane protease serine 13 (EC 3.4.21.-) (Membrane-type mosaic serine protease) (Mosaic serine protease)                                                                                            | scavenger receptor activity [GO:0005044]; serine-type endopeptidase activity [GO:0004252]                                                                                                                                                                                                                                                                                                                                                          |
| [556] | Q9NRS4 | Transmembrane protease serine 4 (EC 3.4.21.-) (Channel-activating protease 2) (CAHP2)                                                                                                                     | scavenger receptor activity [GO:0005044]; serine-type endopeptidase activity [GO:0004252]                                                                                                                                                                                                                                                                                                                                                          |

|       |        |                                                                                                                                                                                                                                                                                                                                                                                                                                                                                                                                                                  |                                                                                                                                           |
|-------|--------|------------------------------------------------------------------------------------------------------------------------------------------------------------------------------------------------------------------------------------------------------------------------------------------------------------------------------------------------------------------------------------------------------------------------------------------------------------------------------------------------------------------------------------------------------------------|-------------------------------------------------------------------------------------------------------------------------------------------|
|       |        | (Membrane-type serine protease 2) (MT-SP2)                                                                                                                                                                                                                                                                                                                                                                                                                                                                                                                       |                                                                                                                                           |
| [557] | P56730 | Neurotrypsin (EC 3.4.21.-) (Leydin) (Motopsin) (Serine protease 12)                                                                                                                                                                                                                                                                                                                                                                                                                                                                                              | scavenger receptor activity [GO:0005044]; serine-type endopeptidase activity [GO:0004252]; serine-type peptidase activity [GO:0008236]    |
| [558] | O15393 | Transmembrane protease serine 2 (EC 3.4.21.-) (Serine protease 10) [Cleaved into: Transmembrane protease serine 2 non-catalytic chain; Transmembrane protease serine 2 catalytic chain]                                                                                                                                                                                                                                                                                                                                                                          | scavenger receptor activity [GO:0005044]; serine-type endopeptidase activity [GO:0004252]; serine-type peptidase activity [GO:0008236]    |
| [559] | P57727 | Transmembrane protease serine 3 (EC 3.4.21.-) (Serine protease TADG-12) (Tumor-associated differentially-expressed gene 12 protein)                                                                                                                                                                                                                                                                                                                                                                                                                              | scavenger receptor activity [GO:0005044]; serine-type endopeptidase activity [GO:0004252]; sodium channel regulator activity [GO:0017080] |
| [560] | P08217 | Chymotrypsin-like elastase family member 2A (EC 3.4.21.71) (Elastase-2A)                                                                                                                                                                                                                                                                                                                                                                                                                                                                                         | serine hydrolase activity [GO:0017171]; serine-type endopeptidase activity [GO:0004252]                                                   |
| [561] | Q9Y5Q5 | Atrial natriuretic peptide-converting enzyme (EC 3.4.21.-) (Corin) (Heart-specific serine proteinase ATC2) (Pro-ANP-converting enzyme) (Transmembrane protease serine 10) [Cleaved into: Atrial natriuretic peptide-converting enzyme, N-terminal propeptide; Atrial natriuretic peptide-converting enzyme, activated protease fragment; Atrial natriuretic peptide-converting enzyme, 180 kDa soluble fragment; Atrial natriuretic peptide-converting enzyme, 160 kDa soluble fragment; Atrial natriuretic peptide-converting enzyme, 100 kDa soluble fragment] | serine-type endopeptidase activity [GO:0004252]                                                                                           |
| [562] | Q9GZN4 | Brain-specific serine protease 4 (BSSP-4) (EC 3.4.21.-) (Serine protease 22) (Serine protease 26) (Trypsin epsilon)                                                                                                                                                                                                                                                                                                                                                                                                                                              | serine-type endopeptidase activity [GO:0004252]                                                                                           |
| [563] | P08218 | Chymotrypsin-like elastase family member 2B (EC 3.4.21.71) (Elastase-2B)                                                                                                                                                                                                                                                                                                                                                                                                                                                                                         | serine-type endopeptidase activity [GO:0004252]                                                                                           |
| [564] | P09093 | Chymotrypsin-like elastase family member 3A (EC 3.4.21.70) (Elastase IIIA) (Elastase-3A) (Protease E)                                                                                                                                                                                                                                                                                                                                                                                                                                                            | serine-type endopeptidase activity [GO:0004252]                                                                                           |
| [565] | P40313 | Chymotrypsin-like protease CTRL-1 (EC 3.4.21.-)                                                                                                                                                                                                                                                                                                                                                                                                                                                                                                                  | serine-type endopeptidase activity [GO:0004252]                                                                                           |
| [566] | Q9NZP8 | Complement C1r subcomponent-like protein (C1r-LP) (C1r-like protein) (EC 3.4.21.-) (C1r-like serine protease analog protein) (CLSPa)                                                                                                                                                                                                                                                                                                                                                                                                                             | serine-type endopeptidase activity [GO:0004252]                                                                                           |
| [567] | P06870 | Kallikrein-1 (EC 3.4.21.35) (Kidney/pancreas/salivary gland kallikrein) (Tissue kallikrein)                                                                                                                                                                                                                                                                                                                                                                                                                                                                      | serine-type endopeptidase activity [GO:0004252]                                                                                           |
| [568] | Q9P0G3 | Kallikrein-14 (hK14) (EC 3.4.21.-) (Kallikrein-like protein 6) (KLK-L6)                                                                                                                                                                                                                                                                                                                                                                                                                                                                                          | serine-type endopeptidase activity [GO:0004252]                                                                                           |
| [569] | Q92876 | Kallikrein-6 (EC 3.4.21.-) (Neurosin) (Protease M) (SP59) (Serine protease 18) (Serine protease 9) (Zyme)                                                                                                                                                                                                                                                                                                                                                                                                                                                        | serine-type endopeptidase activity [GO:0004252]                                                                                           |
| [570] | O60259 | Kallikrein-8 (hK8) (EC 3.4.21.118) (Neuropsin) (NP) (Ovasin) (Serine protease 19) (Serine protease TADG-14) (Tumor-associated differentially expressed gene 14 protein)                                                                                                                                                                                                                                                                                                                                                                                          | serine-type endopeptidase activity [GO:0004252]                                                                                           |
| [571] | P03952 | Plasma kallikrein (EC 3.4.21.34) (Fletcher factor) (Kininogenin) (Plasma prekallikrein) (PKK) [Cleaved into: Plasma kallikrein heavy chain; Plasma kallikrein light chain]                                                                                                                                                                                                                                                                                                                                                                                       | serine-type endopeptidase activity [GO:0004252]                                                                                           |
| [572] | A6NIE9 | Putative serine protease 29 (EC 3.4.21.-) (Implantation serine proteinase 2-like protein) (ISP2-like protein)                                                                                                                                                                                                                                                                                                                                                                                                                                                    | serine-type endopeptidase activity [GO:0004252]                                                                                           |
| [573] | E5RG02 | Putative serine protease 46 (EC 3.4.21.-)                                                                                                                                                                                                                                                                                                                                                                                                                                                                                                                        | serine-type endopeptidase activity [GO:0004252]                                                                                           |
| [574] | A8MTI9 | Putative serine protease 47 (EC 3.4.21.-)                                                                                                                                                                                                                                                                                                                                                                                                                                                                                                                        | serine-type endopeptidase activity [GO:0004252]                                                                                           |
| [575] | Q9BQR3 | Serine protease 27 (EC 3.4.21.-) (Marapsin) (Pancreasin)                                                                                                                                                                                                                                                                                                                                                                                                                                                                                                         | serine-type endopeptidase activity [GO:0004252]                                                                                           |

|       |        |                                                                                                                                                                                                                                                         |                                                                                                 |
|-------|--------|---------------------------------------------------------------------------------------------------------------------------------------------------------------------------------------------------------------------------------------------------------|-------------------------------------------------------------------------------------------------|
| [576] | Q8NF86 | Serine protease 33 (EC 3.4.21.-) (Serine protease EOS)                                                                                                                                                                                                  | serine-type endopeptidase activity [GO:0004252]                                                 |
| [577] | A1L453 | Serine protease 38 (EC 3.4.21.-) (Marapsin-2)                                                                                                                                                                                                           | serine-type endopeptidase activity [GO:0004252]                                                 |
| [578] | Q7Z5A4 | Serine protease 42 (EC 3.4.21.-) (Testis serine protease 2)                                                                                                                                                                                             | serine-type endopeptidase activity [GO:0004252]                                                 |
| [579] | E7EML9 | Serine protease 44 (EC 3.4.21.-) (Testis serine protease 4) (TESSP-4)                                                                                                                                                                                   | serine-type endopeptidase activity [GO:0004252]                                                 |
| [580] | Q7RTY3 | Serine protease 45 (EC 3.4.21.-) (Testis serine protease 5)                                                                                                                                                                                             | serine-type endopeptidase activity [GO:0004252]                                                 |
| [581] | Q7RTY5 | Serine protease 48 (EC 3.4.21.-) (Epidermis-specific serine protease-like protein)                                                                                                                                                                      | serine-type endopeptidase activity [GO:0004252]                                                 |
| [582] | Q6UWB4 | Serine protease 55 (EC 3.4.21.-) (Testis serine protease 1) (T-SP1)                                                                                                                                                                                     | serine-type endopeptidase activity [GO:0004252]                                                 |
| [583] | P0CW18 | Serine protease 56 (EC 3.4.21.-)                                                                                                                                                                                                                        | serine-type endopeptidase activity [GO:0004252]                                                 |
| [584] | Q8IYP2 | Serine protease 58 (EC 3.4.21.4) (Trypsin-X3)                                                                                                                                                                                                           | serine-type endopeptidase activity [GO:0004252]                                                 |
| [585] | Q6ZMR5 | Transmembrane protease serine 11A (EC 3.4.21.-) (Airway trypsin-like protease 1) (Epidermal type-II transmembrane serine protease) (Esophageal cancer-susceptibility gene 1 protein)                                                                    | serine-type endopeptidase activity [GO:0004252]                                                 |
| [586] | Q6ZWK6 | Transmembrane protease serine 11F (EC 3.4.21.-) (Airway trypsin-like protease 4)                                                                                                                                                                        | serine-type endopeptidase activity [GO:0004252]                                                 |
| [587] | Q86WS5 | Transmembrane protease serine 12 (EC 3.4.21.-)                                                                                                                                                                                                          | serine-type endopeptidase activity [GO:0004252]                                                 |
| [588] | Q8IU80 | Transmembrane protease serine 6 (EC 3.4.21.-) (Matriptase-2)                                                                                                                                                                                            | serine-type endopeptidase activity [GO:0004252]                                                 |
| [589] | Q7Z410 | Transmembrane protease serine 9 (EC 3.4.21.-) (Polyserase-I) (Polyserine protease 1) (Polyserase-1) [Cleaved into: Serase-1; Serase-2; Serase-3]                                                                                                        | serine-type endopeptidase activity [GO:0004252]                                                 |
| [590] | P00749 | Urokinase-type plasminogen activator (U-plasminogen activator) (uPA) (EC 3.4.21.73) [Cleaved into: Urokinase-type plasminogen activator long chain A; Urokinase-type plasminogen activator short chain A; Urokinase-type plasminogen activator chain B] | serine-type endopeptidase activity [GO:0004252]                                                 |
| [591] | P00746 | Complement factor D (EC 3.4.21.46) (Adipsin) (C3 convertase activator) (Properdin factor D)                                                                                                                                                             | serine-type endopeptidase activity [GO:0004252];<br>serine-type peptidase activity [GO:0008236] |
| [592] | P49863 | Granzyme K (EC 3.4.21.-) (Fragmentin-3) (Granzyme-3) (NK-tryptase-2) (NK-Tryp-2)                                                                                                                                                                        | serine-type endopeptidase activity [GO:0004252];<br>serine-type peptidase activity [GO:0008236] |
| [593] | P51124 | Granzyme M (EC 3.4.21.-) (Met-1 serine protease) (Hu-Met-1) (Met-ase) (Natural killer cell granular protease)                                                                                                                                           | serine-type endopeptidase activity [GO:0004252];<br>serine-type peptidase activity [GO:0008236] |
| [594] | Q04756 | Hepatocyte growth factor activator (HGF activator) (HGFA) (EC 3.4.21.-) [Cleaved into: Hepatocyte growth factor activator short chain; Hepatocyte growth factor activator long chain]                                                                   | serine-type endopeptidase activity [GO:0004252];<br>serine-type peptidase activity [GO:0008236] |
| [595] | O43240 | Kallikrein-10 (EC 3.4.21.-) (Normal epithelial cell-specific 1) (Protease serine-like 1)                                                                                                                                                                | serine-type endopeptidase activity [GO:0004252];<br>serine-type peptidase activity [GO:0008236] |
| [596] | Q9UBX7 | Kallikrein-11 (hK11) (EC 3.4.21.-) (Hippostasin) (Serine protease 20) (Trypsin-like protease) [Cleaved into: Kallikrein-11 inactive chain 1; Kallikrein-11 inactive chain 2]                                                                            | serine-type endopeptidase activity [GO:0004252];<br>serine-type peptidase activity [GO:0008236] |
| [597] | Q9H2R5 | Kallikrein-15 (EC 3.4.21.-) (ACO protease)                                                                                                                                                                                                              | serine-type endopeptidase activity [GO:0004252];<br>serine-type peptidase activity [GO:0008236] |
| [598] | Q16651 | Prostasin (EC 3.4.21.-) (Channel-activating protease 1) (CAP1) (Serine protease 8) [Cleaved into: Prostasin light chain; Prostasin heavy chain]                                                                                                         | serine-type endopeptidase activity [GO:0004252];<br>serine-type peptidase activity [GO:0008236] |
| [599] | Q9Y5Y6 | Suppressor of tumorigenicity 14 protein (EC 3.4.21.109) (Matriptase) (Membrane-type serine protease 1) (MT-SP1) (Prostamin) (Serine protease 14) (Serine protease TADG-15) (Tumor-associated differentially-expressed gene 15 protein)                  | serine-type endopeptidase activity [GO:0004252];<br>serine-type peptidase activity [GO:0008236] |

|       |        |                                                                                                                                                                                                                                       |                                                                                                                            |
|-------|--------|---------------------------------------------------------------------------------------------------------------------------------------------------------------------------------------------------------------------------------------|----------------------------------------------------------------------------------------------------------------------------|
| [600] | Q86T26 | Transmembrane protease serine 11B (EC 3.4.21.-) (Airway trypsin-like protease 5)                                                                                                                                                      | serine-type endopeptidase activity [GO:0004252]; serine-type peptidase activity [GO:0008236]                               |
| [601] | Q9UL52 | Transmembrane protease serine 11E (EC 3.4.21.-) (Serine protease DESC1) (Transmembrane protease serine 11E2) [Cleaved into: Transmembrane protease serine 11E non-catalytic chain; Transmembrane protease serine 11E catalytic chain] | serine-type endopeptidase activity [GO:0004252]; serine-type peptidase activity [GO:0008236]                               |
| [602] | Q7RTY8 | Transmembrane protease serine 7 (EC 3.4.21.-) (Matriptase-3)                                                                                                                                                                          | serine-type endopeptidase activity [GO:0004252]; serine-type peptidase activity [GO:0008236]                               |
| [603] | Q15661 | Tryptase alpha/beta-1 (Tryptase-1) (EC 3.4.21.59) (Tryptase I) (Tryptase alpha-1)                                                                                                                                                     | serine-type endopeptidase activity [GO:0004252]; serine-type peptidase activity [GO:0008236]                               |
| [604] | P20231 | Tryptase beta-2 (Tryptase-2) (EC 3.4.21.59) (Tryptase II)                                                                                                                                                                             | serine-type endopeptidase activity [GO:0004252]; serine-type peptidase activity [GO:0008236]                               |
| [605] | Q9BZJ3 | Tryptase delta (EC 3.4.21.59) (Delta-tryptase) (HmMCP-3-like tryptase III) (Mast cell mMCP-7-like) (Tryptase-3)                                                                                                                       | serine-type endopeptidase activity [GO:0004252]; serine-type peptidase activity [GO:0008236]                               |
| [606] | Q9NRR2 | Tryptase gamma (EC 3.4.21.-) (Serine protease 31) (Transmembrane tryptase) [Cleaved into: Tryptase gamma light chain; Tryptase gamma heavy chain]                                                                                     | serine-type endopeptidase activity [GO:0004252]; serine-type peptidase activity [GO:0008236]                               |
| [607] | Q9UI38 | Probable threonine protease PRSS50 (EC 3.4.25.-) (Cancer/testis antigen 20) (Serine protease 50) (Testis-specific protease-like protein 50)                                                                                           | threonine-type endopeptidase activity [GO:0004298]                                                                         |
| [608] | O75529 | TAF5-like RNA polymerase II p300/CBP-associated factor-associated factor 65 kDa subunit 5L (PCAF-associated factor 65 beta) (PAF65-beta)                                                                                              | transcription coactivator activity [GO:0003713]; transcription factor activity, sequence-specific DNA binding [GO:0003700] |
| [609] | O75832 | 26S proteasome non-ATPase regulatory subunit 10 (26S proteasome regulatory subunit p28) (Gankyrin) (p28(GANK))                                                                                                                        | transcription factor binding [GO:0008134]                                                                                  |
| [610] | Q96Q27 | Ankyrin repeat and SOCS box protein 2 (ASB-2)                                                                                                                                                                                         | ubiquitin protein ligase activity [GO:0061630]                                                                             |
| [611] | P24863 | Cyclin-C (SRB11 homolog) (hSRB11)                                                                                                                                                                                                     | ubiquitin protein ligase activity [GO:0061630]                                                                             |
| [612] | Q9NPI8 | Fanconi anemia group F protein (Protein FAF)                                                                                                                                                                                          | ubiquitin protein ligase activity [GO:0061630]                                                                             |
| [613] | Q9UKB1 | F-box/WD repeat-containing protein 11 (F-box and WD repeats protein beta-TrCP2) (F-box/WD repeat-containing protein 1B) (Homologous to Slimb protein) (HOS)                                                                           | ubiquitin protein ligase activity [GO:0061630]; ubiquitin-protein transferase activity [GO:0004842]                        |
| [614] | Q15843 | NEDD8 (Neddylin) (Neural precursor cell expressed developmentally down-regulated protein 8) (NEDD-8) (Ubiquitin-like protein Nedd8)                                                                                                   | ubiquitin protein ligase binding [GO:0031625]                                                                              |
| [615] | Q9UKT8 | F-box/WD repeat-containing protein 2 (F-box and WD-40 domain-containing protein 2) (Protein MD6)                                                                                                                                      | ubiquitin-protein transferase activity [GO:0004842]                                                                        |
| [616] | Q8N9V3 | WD repeat, SAM and U-box domain-containing protein 1                                                                                                                                                                                  | ubiquitin-protein transferase activity [GO:0004842]                                                                        |
| [617] | Q9NWT8 | Aurora kinase A-interacting protein (AURKA-interacting protein) (28S ribosomal protein S38, mitochondrial) (MRP-S38)                                                                                                                  |                                                                                                                            |
| [618] | Q8TE02 | Elongator complex protein 5 (Dermal papilla-derived protein 6) (S-phase 2 protein)                                                                                                                                                    |                                                                                                                            |
| [619] | Q5XX13 | F-box/WD repeat-containing protein 10 (F-box and WD-40 domain-containing protein 10) (Ubiquitin ligase-specificity factor)                                                                                                            |                                                                                                                            |
| [620] | Q6UXH9 | Inactive serine protease PAMR1 (Peptidase domain-containing protein associated with muscle regeneration 1) (Regeneration-associated muscle protease homolog)                                                                          |                                                                                                                            |
| [621] | Q9NWT1 | p21-activated protein kinase-interacting protein 1 (PAK/PLC-interacting protein 1) (hPIP1) (PAK1-interacting protein 1) (WD repeat-containing protein 84)                                                                             |                                                                                                                            |
| [622] | Q9BRP4 | Proteasomal ATPase-associated factor 1 (Protein G-16) (WD repeat-containing protein 71)                                                                                                                                               |                                                                                                                            |
| [623] | Q9BZL4 | Protein phosphatase 1 regulatory subunit 12C (Protein phosphatase 1 myosin-binding subunit of 85 kDa) (Protein phosphatase 1 myosin-binding subunit p85)                                                                              |                                                                                                                            |
| [624] | O00472 | RNA polymerase II elongation factor ELL2                                                                                                                                                                                              |                                                                                                                            |
| [625] | Q9H6T3 | RNA polymerase II-associated protein 3                                                                                                                                                                                                |                                                                                                                            |
| [626] | Q8WVC0 | RNA polymerase-associated protein LEO1 (Replicative senescence down-regulated leo1-like protein)                                                                                                                                      |                                                                                                                            |

|       |        |                                                                                                                                                                                                                                                                                                                                                                                                                                                              |
|-------|--------|--------------------------------------------------------------------------------------------------------------------------------------------------------------------------------------------------------------------------------------------------------------------------------------------------------------------------------------------------------------------------------------------------------------------------------------------------------------|
| [627] | O15084 | Serine/threonine-protein phosphatase 6 regulatory ankyrin repeat subunit A (PP6-ARS-A) (Serine/threonine-protein phosphatase 6 regulatory subunit ARS-A) (Ankyrin repeat domain-containing protein 28) (Phosphatase interactor targeting protein hnRNP K) (PITK)                                                                                                                                                                                             |
| [628] | Q8N8A2 | Serine/threonine-protein phosphatase 6 regulatory ankyrin repeat subunit B (PP6-ARS-B) (Serine/threonine-protein phosphatase 6 regulatory subunit ARS-B) (Ankyrin repeat domain-containing protein 44)                                                                                                                                                                                                                                                       |
| [629] | Q8NB46 | Serine/threonine-protein phosphatase 6 regulatory ankyrin repeat subunit C (PP6-ARS-C) (Serine/threonine-protein phosphatase 6 regulatory subunit ARS-C) (Ankyrin repeat domain-containing protein 52)                                                                                                                                                                                                                                                       |
| [630] | P78324 | Tyrosine-protein phosphatase non-receptor type substrate 1 (SHP substrate 1) (SHPS-1) (Brain Ig-like molecule with tyrosine-based activation motifs) (Bit) (CD172 antigen-like family member A) (Inhibitory receptor SHPS-1) (Macrophage fusion receptor) (MyD-1 antigen) (Signal-regulatory protein alpha-1) (Sirp-alpha-1) (Signal-regulatory protein alpha-2) (Sirp-alpha-2) (Signal-regulatory protein alpha-3) (Sirp-alpha-3) (p84) (CD antigen CD172a) |

|  |  |  |
|--|--|--|
|  |  |  |
|--|--|--|

### Other proteins

| Serial number | Entry  | Protein name                                                                                                                                                                              | GO annotation (molecular function)                                                                               |
|---------------|--------|-------------------------------------------------------------------------------------------------------------------------------------------------------------------------------------------|------------------------------------------------------------------------------------------------------------------|
| [1]           | Q8IWB7 | WD repeat and FYVE domain-containing protein 1 (FENS-1) (Phosphoinositide-binding protein 1) (WD40- and FYVE domain-containing protein 1) (Zinc finger FYVE domain-containing protein 17) | 1-phosphatidylinositol binding [GO:0005545]; zinc ion binding [GO:0008270]                                       |
| [2]           | P57737 | Coronin-7 (Crn7) (70 kDa WD repeat tumor rejection antigen homolog)                                                                                                                       | actin binding [GO:0003779]                                                                                       |
| [3]           | Q9UQ03 | Coronin-2B (Coronin-like protein C) (Clipin-C) (Protein FC96)                                                                                                                             | actin binding [GO:0003779]; actin filament binding [GO:0051015]                                                  |
| [4]           | Q9ULV4 | Coronin-1C (Coronin-3) (hCRNN4)                                                                                                                                                           | actin filament binding [GO:0051015]                                                                              |
| [5]           | Q92828 | Coronin-2A (IR10) (WD repeat-containing protein 2)                                                                                                                                        | actin filament binding [GO:0051015]                                                                              |
| [6]           | Q6QEF8 | Coronin-6 (Coronin-like protein E) (Clipin-E)                                                                                                                                             | actin filament binding [GO:0051015]                                                                              |
| [7]           | Q9BR76 | Coronin-1B (Coronin-2)                                                                                                                                                                    | actin filament binding [GO:0051015]; Arp2/3 complex binding [GO:0071933]; identical protein binding [GO:0042802] |
| [8]           | B1AK53 | Espin (Autosomal recessive deafness type 36 protein) (Ectoplasmic specialization protein)                                                                                                 | actin filament binding [GO:0051015]; SH3 domain binding [GO:0017124]                                             |
| [9]           | P01876 | Ig alpha-1 chain C region                                                                                                                                                                 | antigen binding [GO:0003823]                                                                                     |
| [10]          | P01877 | Ig alpha-2 chain C region                                                                                                                                                                 | antigen binding [GO:0003823]                                                                                     |
| [11]          | P01880 | Ig delta chain C region                                                                                                                                                                   | antigen binding [GO:0003823]                                                                                     |
| [12]          | P01854 | Ig epsilon chain C region                                                                                                                                                                 | antigen binding [GO:0003823]                                                                                     |
| [13]          | P01834 | Ig kappa chain C region                                                                                                                                                                   | antigen binding [GO:0003823]                                                                                     |
| [14]          | P0CG04 | Ig lambda-1 chain C regions                                                                                                                                                               | antigen binding [GO:0003823]                                                                                     |
| [15]          | P0CG05 | Ig lambda-2 chain C regions                                                                                                                                                               | antigen binding [GO:0003823]                                                                                     |
| [16]          | P0CG06 | Ig lambda-3 chain C regions                                                                                                                                                               | antigen binding [GO:0003823]                                                                                     |
| [17]          | P0CF74 | Ig lambda-6 chain C region                                                                                                                                                                | antigen binding [GO:0003823]                                                                                     |
| [18]          | A0M8Q6 | Ig lambda-7 chain C region                                                                                                                                                                | antigen binding [GO:0003823]                                                                                     |
| [19]          | P01871 | Ig mu chain C region                                                                                                                                                                      | antigen binding [GO:0003823]                                                                                     |
| [20]          | P00738 | Haptoglobin (Zonulin) [Cleaved into: Haptoglobin alpha chain; Haptoglobin beta chain]                                                                                                     | antioxidant activity [GO:0016209]; hemoglobin binding [GO:0030492]                                               |
| [21]          | Q149M9 | NACHT domain- and WD repeat-containing protein 1                                                                                                                                          | ATP binding [GO:0005524]                                                                                         |
| [22]          | Q14678 | KN motif and ankyrin repeat domain-containing protein 1 (Ankyrin repeat domain-containing protein 15) (Kidney ankyrin repeat-containing protein)                                          | beta-catenin binding [GO:0008013]                                                                                |
| [23]          | Q12955 | Ankyrin-3 (ANK-3) (Ankyrin-G)                                                                                                                                                             | cadherin binding [GO:0045296]; cytoskeletal protein binding [GO:0008092]; ion channel                            |

|      |        |                                                                                                                                                              |                                                                                                                                                                                                                                                                                                                                                                                                                                                                   |
|------|--------|--------------------------------------------------------------------------------------------------------------------------------------------------------------|-------------------------------------------------------------------------------------------------------------------------------------------------------------------------------------------------------------------------------------------------------------------------------------------------------------------------------------------------------------------------------------------------------------------------------------------------------------------|
|      |        |                                                                                                                                                              | binding [GO:0044325]; protein binding, bridging [GO:0030674]; spectrin binding [GO:0030507]; structural constituent of cytoskeleton [GO:0005200]                                                                                                                                                                                                                                                                                                                  |
| [24] | Q9NU02 | Ankyrin repeat and EF-hand domain-containing protein 1 (Ankyrin repeat domain-containing protein 5)                                                          | calcium ion binding [GO:0005509]                                                                                                                                                                                                                                                                                                                                                                                                                                  |
| [25] | Q9UM47 | Neurogenic locus notch homolog protein 3 (Notch 3) [Cleaved into: Notch 3 extracellular truncation; Notch 3 intracellular domain]                            | calcium ion binding [GO:0005509]                                                                                                                                                                                                                                                                                                                                                                                                                                  |
| [26] | O00423 | Echinoderm microtubule-associated protein-like 1 (EMAP-1) (HuEMAP-1)                                                                                         | calcium ion binding [GO:0005509]; microtubule binding [GO:0008017]; tubulin binding [GO:0015631]                                                                                                                                                                                                                                                                                                                                                                  |
| [27] | Q05BV3 | Echinoderm microtubule-associated protein-like 5 (EMAP-5)                                                                                                    | catalytic activity [GO:0003824]                                                                                                                                                                                                                                                                                                                                                                                                                                   |
| [28] | Q8N145 | Leucine-rich repeat LGI family member 3 (LGI1-like protein 4) (Leucine-rich glioma-inactivated protein 3)                                                    | catalytic activity [GO:0003824]                                                                                                                                                                                                                                                                                                                                                                                                                                   |
| [29] | O75762 | Transient receptor potential cation channel subfamily A member 1 (Ankyrin-like with transmembrane domains protein 1) (Transformation-sensitive protein p120) | channel activity [GO:0015267]; intracellular ligand-gated calcium channel activity [GO:0005218]; temperature-gated cation channel activity [GO:0097604]                                                                                                                                                                                                                                                                                                           |
| [30] | P14210 | Hepatocyte growth factor (Hepatopoietin-A) (Scatter factor) (SF) [Cleaved into: Hepatocyte growth factor alpha chain; Hepatocyte growth factor beta chain]   | chemoattractant activity [GO:0042056]; growth factor activity [GO:0008083]; identical protein binding [GO:0042802]                                                                                                                                                                                                                                                                                                                                                |
| [31] | O43155 | Leucine-rich repeat transmembrane protein FLRT2 (Fibronectin-like domain-containing leucine-rich transmembrane protein 2)                                    | chemorepellent activity [GO:0045499]; protein binding, bridging [GO:0030674]; receptor signaling protein activity [GO:0005057]                                                                                                                                                                                                                                                                                                                                    |
| [32] | Q9NZU0 | Leucine-rich repeat transmembrane protein FLRT3 (Fibronectin-like domain-containing leucine-rich transmembrane protein 3)                                    | chemorepellent activity [GO:0045499]; protein binding, bridging [GO:0030674]; receptor signaling protein activity [GO:0005057]                                                                                                                                                                                                                                                                                                                                    |
| [33] | Q12770 | Sterol regulatory element-binding protein cleavage-activating protein (SCAP) (SREBP cleavage-activating protein)                                             | cholesterol binding [GO:0015485]; unfolded protein binding [GO:0051082]                                                                                                                                                                                                                                                                                                                                                                                           |
| [34] | Q6UXN9 | WD repeat-containing protein 82 (Protein TMEM113) (Swd2)                                                                                                     | chromatin binding [GO:0003682]                                                                                                                                                                                                                                                                                                                                                                                                                                    |
| [35] | P51884 | Lumican (Keratan sulfate proteoglycan lumican) (KSPG lumican)                                                                                                | collagen binding [GO:0005518]; extracellular matrix structural constituent [GO:0005201]                                                                                                                                                                                                                                                                                                                                                                           |
| [36] | Q8TF66 | Leucine-rich repeat-containing protein 15 (Leucine-rich repeat protein induced by beta-amyloid homolog) (hLib)                                               | collagen binding [GO:0005518]; fibronectin binding [GO:0001968]; laminin binding [GO:0043236]                                                                                                                                                                                                                                                                                                                                                                     |
| [37] | Q9Y2C9 | Toll-like receptor 6 (CD antigen CD286)                                                                                                                      | diacyl lipopeptide binding [GO:0042498]; lipopeptide binding [GO:0071723]; receptor activity [GO:0004872]; transmembrane signaling receptor activity [GO:0004888]                                                                                                                                                                                                                                                                                                 |
| [38] | O60603 | Toll-like receptor 2 (Toll/interleukin-1 receptor-like protein 4) (CD antigen CD282)                                                                         | diacyl lipopeptide binding [GO:0042498]; lipopolysaccharide binding [GO:0001530]; lipopolysaccharide receptor activity [GO:0001875]; lipoteichoic acid binding [GO:0070891]; peptidoglycan binding [GO:0042834]; protein heterodimerization activity [GO:0046982]; receptor activity [GO:0004872]; signaling pattern recognition receptor activity [GO:0008329]; transmembrane signaling receptor activity [GO:0004888]; triacyl lipopeptide binding [GO:0042497] |
| [39] | Q562E7 | WD repeat-containing protein 81                                                                                                                              | dynein binding [GO:0045502]; microtubule binding [GO:0008017]                                                                                                                                                                                                                                                                                                                                                                                                     |
| [40] | Q7Z6G8 | Ankyrin repeat and sterile alpha motif domain-containing protein 1B (Amyloid-beta protein intracellular domain-associated protein 1) (AIDA-                  | ephrin receptor binding [GO:0046875]                                                                                                                                                                                                                                                                                                                                                                                                                              |

|      |        |                                                                                                                                                                                 |                                                                                                                                                                                            |
|------|--------|---------------------------------------------------------------------------------------------------------------------------------------------------------------------------------|--------------------------------------------------------------------------------------------------------------------------------------------------------------------------------------------|
|      |        | 1) (E2A-PBX1-associated protein) (EB-1)                                                                                                                                         |                                                                                                                                                                                            |
| [41] | Q96T76 | MMS19 nucleotide excision repair protein homolog (hMMS19) (MET18 homolog) (MMS19-like protein)                                                                                  | estrogen receptor binding [GO:0030331]; protein binding, bridging [GO:0030674]; receptor signaling complex scaffold activity [GO:0030159]; transcription coactivator activity [GO:0003713] |
| [42] | Q13541 | Eukaryotic translation initiation factor 4E-binding protein 1 (4E-BP1) (eIF4E-binding protein 1) (Phosphorylated heat- and acid-stable protein regulated by insulin 1) (PHAS-I) | eukaryotic initiation factor 4E binding [GO:0008190]; translation repressor activity [GO:0030371]                                                                                          |
| [43] | Q13542 | Eukaryotic translation initiation factor 4E-binding protein 2 (4E-BP2) (eIF4E-binding protein 2)                                                                                | eukaryotic initiation factor 4E binding [GO:0008190]; translation repressor activity [GO:0030371]                                                                                          |
| [44] | O60516 | Eukaryotic translation initiation factor 4E-binding protein 3 (4E-BP3) (eIF4E-binding protein 3)                                                                                | eukaryotic initiation factor 4E binding [GO:0008190]; translation repressor activity [GO:0030371]                                                                                          |
| [45] | P21810 | Biglycan (Bone/cartilage proteoglycan I) (PG-S1)                                                                                                                                | extracellular matrix binding [GO:0050840]; extracellular matrix structural constituent [GO:0005201]; glycosaminoglycan binding [GO:0005539]                                                |
| [46] | Q9BR61 | Acyl-CoA-binding domain-containing protein 6                                                                                                                                    | fatty-acyl-CoA binding [GO:0000062]; lipid binding [GO:0008289]                                                                                                                            |
| [47] | P59768 | Guanine nucleotide-binding protein G(I)/G(S)/G(O) subunit gamma-2 (G gamma-I)                                                                                                   | G-protein beta-subunit binding [GO:0031681]; signal transducer activity [GO:0004871]                                                                                                       |
| [48] | Q9HBX9 | Relaxin receptor 1 (Leucine-rich repeat-containing G-protein coupled receptor 7) (Relaxin family peptide receptor 1)                                                            | G-protein coupled receptor activity [GO:0004930]; metal ion binding [GO:0046872]                                                                                                           |
| [49] | Q9BXB1 | Leucine-rich repeat-containing G-protein coupled receptor 4 (G-protein coupled receptor 48)                                                                                     | G-protein coupled receptor activity [GO:0004930]; transmembrane signaling receptor activity [GO:0004888]                                                                                   |
| [50] | O75473 | Leucine-rich repeat-containing G-protein coupled receptor 5 (G-protein coupled receptor 49) (G-protein coupled receptor 67) (G-protein coupled receptor HG38)                   | G-protein coupled receptor activity [GO:0004930]; transmembrane signaling receptor activity [GO:0004888]                                                                                   |
| [51] | Entry  | Protein names                                                                                                                                                                   | Gene ontology (molecular function)                                                                                                                                                         |
| [52] | P00739 | Haptoglobin-related protein                                                                                                                                                     | hemoglobin binding [GO:0030492]                                                                                                                                                            |
| [53] | Q13685 | Angio-associated migratory cell protein                                                                                                                                         | heparin binding [GO:0008201]                                                                                                                                                               |
| [54] | Q8N157 | Jouberin (Abelson helper integration site 1 protein homolog) (AHI-1)                                                                                                            | identical protein binding [GO:0042802]                                                                                                                                                     |
| [55] | Q8WWQ0 | PH-interacting protein (PHIP) (IRS-1 PH domain-binding protein) (WD repeat-containing protein 11)                                                                               | insulin receptor binding [GO:0005158]; lysine-acetylated histone binding [GO:0070577]                                                                                                      |
| [56] | O60602 | Toll-like receptor 5 (Toll/interleukin-1 receptor-like protein 3)                                                                                                               | interleukin-1 receptor binding [GO:0005149]; transmembrane signaling receptor activity [GO:0004888]                                                                                        |
| [57] | Q9BQA1 | Methylosome protein 50 (MEP-50) (Androgen receptor cofactor p44) (WD repeat-containing protein 77) (p44/Mep50)                                                                  | ligand-dependent nuclear receptor transcription coactivator activity [GO:0030374]                                                                                                          |
| [58] | O00206 | Toll-like receptor 4 (hToll) (CD antigen CD284)                                                                                                                                 | lipopolysaccharide binding [GO:0001530]; lipopolysaccharide receptor activity [GO:0001875]; receptor activity [GO:0004872]; transmembrane signaling receptor activity [GO:0004888]         |
| [59] | Q9H9E1 | Ankyrin repeat family A protein 2 (RFXANK-like protein 2)                                                                                                                       | low-density lipoprotein particle binding [GO:0030169]; transcription cofactor activity [GO:0003712]                                                                                        |
| [60] | Q6UWQ5 | Lysozyme-like protein 1 (EC 3.2.1.17)                                                                                                                                           | lysozyme activity [GO:0003796]                                                                                                                                                             |
| [61] | Q7Z4W2 | Lysozyme-like protein 2 (Lysozyme-2) (EC 3.2.1.17)                                                                                                                              | lysozyme activity [GO:0003796]                                                                                                                                                             |
| [62] | Q96KX0 | Lysozyme-like protein 4 (Lysozyme-4)                                                                                                                                            | lysozyme activity [GO:0003796]                                                                                                                                                             |
| [63] | O75951 | Lysozyme-like protein 6 (EC 3.2.1.17)                                                                                                                                           | lysozyme activity [GO:0003796]                                                                                                                                                             |

|      |        |                                                                                                                                                                                                                                                                                                                                                                                                                                            |                                                                                                                                       |
|------|--------|--------------------------------------------------------------------------------------------------------------------------------------------------------------------------------------------------------------------------------------------------------------------------------------------------------------------------------------------------------------------------------------------------------------------------------------------|---------------------------------------------------------------------------------------------------------------------------------------|
| [64] | Q8IXA5 | Sperm acrosome membrane-associated protein 3 (Cancer/testis antigen 54) (CT54) (Lysozyme-like acrosomal sperm-specific secretory protein ALLP-17) (Lysozyme-like protein 3) (Sperm lysozyme-like protein 1) (Sperm protein reactive with antisperm antibodies) (Sperm protein reactive with ASA) [Cleaved into: Sperm acrosome membrane-associated protein 3, membrane form; Sperm acrosome membrane-associated protein 3, processed form] | lysozyme activity [GO:0003796]                                                                                                        |
| [65] | Q96QH8 | Sperm acrosome-associated protein 5 (EC 3.2.1.17) (Lysozyme-like protein 5) (Sperm-specific lysozyme-like protein X) (SLLP-X)                                                                                                                                                                                                                                                                                                              | lysozyme activity [GO:0003796]                                                                                                        |
| [66] | Q9P2S6 | Ankyrin repeat and MYND domain-containing protein 1 (Testis-specific ankyrin-like protein 1) (Zinc finger MYND domain-containing protein 13)                                                                                                                                                                                                                                                                                               | metal ion binding [GO:0046872]                                                                                                        |
| [67] | Q8WW33 | Gametocyte-specific factor 1 (Protein FAM112B)                                                                                                                                                                                                                                                                                                                                                                                             | metal ion binding [GO:0046872]                                                                                                        |
| [68] | Q9H1H1 | Gametocyte-specific factor 1-like (Protein FAM112A)                                                                                                                                                                                                                                                                                                                                                                                        | metal ion binding [GO:0046872]                                                                                                        |
| [69] | Q96P53 | WD repeat and FYVE domain-containing protein 2 (WD40- and FYVE domain-containing protein 2) (Zinc finger FYVE domain-containing protein 22)                                                                                                                                                                                                                                                                                                | metal ion binding [GO:0046872]                                                                                                        |
| [70] | P0DKX0 | Zinc finger protein 728                                                                                                                                                                                                                                                                                                                                                                                                                    | metal ion binding [GO:0046872]; nucleic acid binding [GO:0003676]                                                                     |
| [71] | P98169 | Zinc finger X-linked protein ZXDB                                                                                                                                                                                                                                                                                                                                                                                                          | metal ion binding [GO:0046872]; nucleic acid binding [GO:0003676]                                                                     |
| [72] | A6NKH3 | Putative 60S ribosomal protein L37a-like protein (Ribosomal protein L37a pseudogene 8)                                                                                                                                                                                                                                                                                                                                                     | metal ion binding [GO:0046872]; structural constituent of ribosome [GO:0003735]                                                       |
| [73] | O14576 | Cytoplasmic dynein 1 intermediate chain 1 (Cytoplasmic dynein intermediate chain 1) (Dynein intermediate chain 1, cytosolic) (DH IC-1)                                                                                                                                                                                                                                                                                                     | microtubule binding [GO:0008017]; microtubule motor activity [GO:0003777]; motor activity [GO:0003774]; spectrin binding [GO:0030507] |
| [74] | Q9BVA0 | Katanin p80 WD40 repeat-containing subunit B1 (Katanin p80 subunit B1) (p80 katanin)                                                                                                                                                                                                                                                                                                                                                       | microtubule binding [GO:0008017]; protein heterodimerization activity [GO:0046982]                                                    |
| [75] | O95834 | Echinoderm microtubule-associated protein-like 2 (EMAP-2) (HuEMAP-2)                                                                                                                                                                                                                                                                                                                                                                       | microtubule binding [GO:0008017]; tubulin binding [GO:0015631]                                                                        |
| [76] | Q13409 | Cytoplasmic dynein 1 intermediate chain 2 (Cytoplasmic dynein intermediate chain 2) (Dynein intermediate chain 2, cytosolic) (DH IC-2)                                                                                                                                                                                                                                                                                                     | microtubule motor activity [GO:0003777]                                                                                               |
| [77] | Q9BZR6 | Reticulon-4 receptor (Nogo receptor) (NgR) (Nogo-66 receptor)                                                                                                                                                                                                                                                                                                                                                                              | neuregulin receptor activity [GO:0038131]; receptor activity [GO:0004872]                                                             |
| [78] | Q8N302 | Angiogenic factor with G patch and FHA domains 1 (Angiogenic factor VG5Q) (hVG5Q) (G patch domain-containing protein 7) (Vasculogenesis gene on 5q protein)                                                                                                                                                                                                                                                                                | nucleic acid binding [GO:0003676]                                                                                                     |
| [79] | O95872 | G patch domain and ankyrin repeat-containing protein 1 (Ankyrin repeat domain-containing protein 59) (G patch domain-containing protein 10) (HLA-B-associated transcript 4) (Protein G5)                                                                                                                                                                                                                                                   | nucleic acid binding [GO:0003676]                                                                                                     |
| [80] | Q8N954 | G patch domain-containing protein 11 (Coiled-coil domain-containing protein 75)                                                                                                                                                                                                                                                                                                                                                            | nucleic acid binding [GO:0003676]                                                                                                     |
| [81] | Q8WUM0 | Nuclear pore complex protein Nup133 (133 kDa nucleoporin) (Nucleoporin Nup133)                                                                                                                                                                                                                                                                                                                                                             | nucleocytoplasmic transporter activity [GO:0005487]                                                                                   |
| [82] | Q9UBI6 | Guanine nucleotide-binding protein G(I)/G(S)/G(O) subunit gamma-12                                                                                                                                                                                                                                                                                                                                                                         | PDZ domain binding [GO:0030165]; phosphate ion binding [GO:0042301]; signal transducer activity [GO:0004871]                          |
| [83] | Q8WXD0 | Relaxin receptor 2 (G-protein coupled receptor 106) (G-protein coupled receptor affecting testicular descent) (Leucine-rich repeat-containing G-protein coupled receptor 8) (Relaxin family peptide receptor 2)                                                                                                                                                                                                                            | peptide hormone binding [GO:0017046]; protein-hormone receptor activity [GO:0016500]                                                  |
| [84] | P50851 | Lipopolysaccharide-responsive and beige-like anchor protein (Beige-like protein) (CDC4-like                                                                                                                                                                                                                                                                                                                                                | phospholipid binding [GO:0005543]                                                                                                     |



|       |        |                                                                                                                                                                                                    |                                                                                                                                                                                                                                      |
|-------|--------|----------------------------------------------------------------------------------------------------------------------------------------------------------------------------------------------------|--------------------------------------------------------------------------------------------------------------------------------------------------------------------------------------------------------------------------------------|
|       |        | protein)                                                                                                                                                                                           |                                                                                                                                                                                                                                      |
| [85]  | Q99698 | Lysosomal-trafficking regulator (Beige homolog)                                                                                                                                                    | phospholipid binding [GO:0005543]                                                                                                                                                                                                    |
| [86]  | Q6ZS81 | WD repeat- and FYVE domain-containing protein 4                                                                                                                                                    | phospholipid binding [GO:0005543]                                                                                                                                                                                                    |
| [87]  | Q86WK6 | Amphoterin-induced protein 1 (AMIGO-1) (Alivin-2)                                                                                                                                                  | potassium channel regulator activity [GO:0015459]                                                                                                                                                                                    |
| [88]  | Q2I0M4 | Leucine-rich repeat-containing protein 26 (BK channel auxiliary gamma subunit LRRC26) (Cytokeratin-associated protein in cancer)                                                                   | potassium channel regulator activity [GO:0015459]                                                                                                                                                                                    |
| [89]  | O15205 | Ubiquitin D (Diubiquitin) (Ubiquitin-like protein FAT10)                                                                                                                                           | proteasome binding [GO:0070628]                                                                                                                                                                                                      |
| [90]  | O94901 | SUN domain-containing protein 1 (Protein unc-84 homolog A) (Sad1/unc-84 protein-like 1)                                                                                                            | protein anchor [GO:0043495]                                                                                                                                                                                                          |
| [91]  | Q9NZU1 | Leucine-rich repeat transmembrane protein FLRT1 (Fibronectin-like domain-containing leucine-rich transmembrane protein 1)                                                                          | protein binding, bridging [GO:0030674]; receptor signaling protein activity [GO:0005057]                                                                                                                                             |
| [92]  | Q9HAV0 | Guanine nucleotide-binding protein subunit beta-4 (Transducin beta chain 4)                                                                                                                        | protein complex binding [GO:0032403]; signal transducer activity [GO:0004871]                                                                                                                                                        |
| [93]  | P52657 | Transcription initiation factor IIA subunit 2 (General transcription factor IIA subunit 2) (TFIIA p12 subunit) (TFIIA-12) (TFIIAS) (Transcription initiation factor IIA gamma chain) (TFIIA-gamma) | protein heterodimerization activity [GO:0046982]; protein homodimerization activity [GO:0042803]; TBP-class protein binding [GO:0017025]; transcription coactivator activity [GO:0003713]; transcription factor binding [GO:0008134] |
| [94]  | Q15399 | Toll-like receptor 1 (Toll/interleukin-1 receptor-like protein) (TIL) (CD antigen CD281)                                                                                                           | protein heterodimerization activity [GO:0046982]; receptor activity [GO:0004872]; transmembrane signaling receptor activity [GO:0004888]                                                                                             |
| [95]  | Q8IW40 | Coiled-coil domain-containing protein 103                                                                                                                                                          | protein homodimerization activity [GO:0042803]                                                                                                                                                                                       |
| [96]  | P05161 | Ubiquitin-like protein ISG15 (Interferon-induced 15 kDa protein) (Interferon-induced 17 kDa protein) (IP17) (Ubiquitin cross-reactive protein) (hUCRP)                                             | protein tag [GO:0031386]                                                                                                                                                                                                             |
| [97]  | Q86UN2 | Reticulon-4 receptor-like 1 (Nogo receptor-like 2) (Nogo-66 receptor homolog 2) (Nogo-66 receptor-related protein 3) (NgR3)                                                                        | receptor activity [GO:0004872]                                                                                                                                                                                                       |
| [98]  | Q8WWH4 | Ankyrin repeat, SAM and basic leucine zipper domain-containing protein 1 (Ankyrin-like protein 1) (Germ cell-specific ankyrin, SAM and basic leucine zipper domain-containing protein)             | signal transducer activity [GO:0004871]                                                                                                                                                                                              |
| [99]  | P50150 | Guanine nucleotide-binding protein G(I)/G(S)/G(O) subunit gamma-4                                                                                                                                  | signal transducer activity [GO:0004871]                                                                                                                                                                                              |
| [100] | O60262 | Guanine nucleotide-binding protein G(I)/G(S)/G(O) subunit gamma-7                                                                                                                                  | signal transducer activity [GO:0004871]                                                                                                                                                                                              |
| [101] | Q15653 | NF-kappa-B inhibitor beta (NF-kappa-BIB) (I-kappa-B-beta) (Ikb-B) (Ikb-beta) (IkappaBbeta) (Thyroid receptor-interacting protein 9) (TR-interacting protein 9) (TRIP-9)                            | signal transducer activity [GO:0004871]; transcription coactivator activity [GO:0003713]                                                                                                                                             |
| [102] | O75694 | Nuclear pore complex protein Nup155 (155 kDa nucleoporin) (Nucleoporin Nup155)                                                                                                                     | structural constituent of nuclear pore [GO:0017056]; transporter activity [GO:0005215]                                                                                                                                               |
| [103] | Q59GN2 | Putative 60S ribosomal protein L39-like 5 (60S ribosomal protein L39 pseudogene 5)                                                                                                                 | structural constituent of ribosome [GO:0003735]                                                                                                                                                                                      |
| [104] | Q9BQC6 | Ribosomal protein 63, mitochondrial (hMRP63) (Mitochondrial ribosomal protein 63) (Mitochondrial ribosomal protein L57)                                                                            | structural constituent of ribosome [GO:0003735]                                                                                                                                                                                      |
| [105] | P53621 | Coatomer subunit alpha (Alpha-coat protein) (Alpha-COP) (HEP-COP) (HEPCOP) [Cleaved into: Xenin (Xenopsin-related peptide); Proxenin]                                                              | structural molecule activity [GO:0005198]                                                                                                                                                                                            |
| [106] | P35606 | Coatomer subunit beta' (Beta'-coat protein) (Beta'-COP) (p102)                                                                                                                                     | structural molecule activity [GO:0005198]                                                                                                                                                                                            |
| [107] | Q86SG2 | Ankyrin repeat domain-containing protein 23 (Diabetes-related ankyrin repeat protein) (Muscle ankyrin repeat protein 3)                                                                            | titin binding [GO:0031432]                                                                                                                                                                                                           |

|       |        |                                                                                      |                                                                                   |
|-------|--------|--------------------------------------------------------------------------------------|-----------------------------------------------------------------------------------|
| [108] | Q04725 | Transducin-like enhancer protein 2 (Enhancer of split groucho-like protein 2) (ESG2) | transcription corepressor activity [GO:0003714]                                   |
| [109] | Q6EMK4 | Vasorin (Protein slit-like 2)                                                        | transforming growth factor beta binding [GO:0050431]                              |
| [110] | O75312 | Zinc finger protein ZPR1 (Zinc finger protein 259)                                   | translation initiation factor binding [GO:0031369]; zinc ion binding [GO:0008270] |
| [111] | Q9HBX8 | Leucine-rich repeat-containing G-protein coupled receptor 6                          | transmembrane signaling receptor activity [GO:0004888]                            |
| [112] | Q9BXR5 | Toll-like receptor 10 (CD antigen CD290)                                             | transmembrane signaling receptor activity [GO:0004888]                            |
| [113] | Q9H9V4 | RING finger protein 122                                                              | zinc ion binding [GO:0008270]                                                     |
| [114] | Q8N7C7 | RING finger protein 148                                                              | zinc ion binding [GO:0008270]                                                     |
| [115] | Q9ULK6 | RING finger protein 150                                                              | zinc ion binding [GO:0008270]                                                     |
| [116] | Q6ZSG1 | RING finger protein 165                                                              | zinc ion binding [GO:0008270]                                                     |
| [117] | Q9Y6U7 | RING finger protein 215                                                              | zinc ion binding [GO:0008270]                                                     |
| [118] | A6NCQ9 | RING finger protein 222                                                              | zinc ion binding [GO:0008270]                                                     |
| [119] | Q9Y225 | RING finger protein 24                                                               | zinc ion binding [GO:0008270]                                                     |
| [120] | Q9H0A6 | RING finger protein 32                                                               | zinc ion binding [GO:0008270]                                                     |
| [121] | Q7L0R7 | RING finger protein 44                                                               | zinc ion binding [GO:0008270]                                                     |
| [122] | Q6PJ69 | Tripartite motif-containing protein 65                                               | zinc ion binding [GO:0008270]                                                     |
| [123] | Q8WWF5 | Zinc/RING finger protein 4 (RING finger protein 204)                                 | zinc ion binding [GO:0008270]                                                     |

#### Unannotated proteins

| Serial number | Entry   | Protein name                                                                                                                                                                                     | GO annotation (molecular function) |
|---------------|---------|--------------------------------------------------------------------------------------------------------------------------------------------------------------------------------------------------|------------------------------------|
| [1]           | P60896  | 26S proteasome complex subunit DSS1 (Deleted in split hand/split foot protein 1) (Split hand/foot deleted protein 1) (Split hand/foot malformation type 1 protein)                               |                                    |
| [2]           | Q8NHW5  | 60S acidic ribosomal protein P0-like                                                                                                                                                             |                                    |
| [3]           | Q86WK7  | Amphoterin-induced protein 3 (AMIGO-3) (Alivin-3)                                                                                                                                                |                                    |
| [4]           | Q9P0K7  | Ankyrin repeat and coiled-coil structure-containing protein (Novel retinal pigment epithelial cell protein) (Retinoic acid-induced protein 14)                                                   |                                    |
| [5]           | Q495B1  | Ankyrin repeat and death domain-containing protein 1A                                                                                                                                            |                                    |
| [6]           | A6NHY2  | Ankyrin repeat and death domain-containing protein 1B                                                                                                                                            |                                    |
| [7]           | Q92625  | Ankyrin repeat and SAM domain-containing protein 1A (Odin)                                                                                                                                       |                                    |
| [8]           | Q6ZW76  | Ankyrin repeat and SAM domain-containing protein 3                                                                                                                                               |                                    |
| [9]           | Q68DC2  | Ankyrin repeat and SAM domain-containing protein 6 (Ankyrin repeat domain-containing protein 14) (SamCystin) (Sterile alpha motif domain-containing protein 6) (SAM domain-containing protein 6) |                                    |
| [10]          | Q8WXI3  | Ankyrin repeat and SOCS box protein 10 (ASB-10)                                                                                                                                                  |                                    |
| [11]          | Q8W XK3 | Ankyrin repeat and SOCS box protein 13 (ASB-13)                                                                                                                                                  |                                    |
| [12]          | A6NK59  | Ankyrin repeat and SOCS box protein 14 (ASB-14)                                                                                                                                                  |                                    |
| [13]          | Q8W XK1 | Ankyrin repeat and SOCS box protein 15 (ASB-15)                                                                                                                                                  |                                    |
| [14]          | Q96NS5  | Ankyrin repeat and SOCS box protein 16 (ASB-16)                                                                                                                                                  |                                    |
| [15]          | Q9Y575  | Ankyrin repeat and SOCS box protein 3 (ASB-3)                                                                                                                                                    |                                    |
| [16]          | Q9NWX5  | Ankyrin repeat and SOCS box protein 6 (ASB-6)                                                                                                                                                    |                                    |
| [17]          | Q9H672  | Ankyrin repeat and SOCS box protein 7 (ASB-7)                                                                                                                                                    |                                    |
| [18]          | Q9H765  | Ankyrin repeat and SOCS box protein 8 (ASB-8)                                                                                                                                                    |                                    |
| [19]          | Q6UB98  | Ankyrin repeat domain-containing protein 12 (Ankyrin repeat-containing cofactor 2) (GAC-1 protein)                                                                                               |                                    |
| [20]          | Q6P6B7  | Ankyrin repeat domain-containing protein 16                                                                                                                                                      |                                    |
| [21]          | Q5TYW2  | Ankyrin repeat domain-containing protein 20A1                                                                                                                                                    |                                    |

|      |        |                                                                                                                                                                        |
|------|--------|------------------------------------------------------------------------------------------------------------------------------------------------------------------------|
| [22] | Q5SQ80 | Ankyrin repeat domain-containing protein 20A2                                                                                                                          |
| [23] | Q5VUR7 | Ankyrin repeat domain-containing protein 20A3                                                                                                                          |
| [24] | Q4UJ75 | Ankyrin repeat domain-containing protein 20A4                                                                                                                          |
| [25] | Q5CZ79 | Ankyrin repeat domain-containing protein 20B (Ankyrin repeat domain-containing protein 20A pseudogene)                                                                 |
| [26] | Q8TF21 | Ankyrin repeat domain-containing protein 24                                                                                                                            |
| [27] | Q8N6D5 | Ankyrin repeat domain-containing protein 29                                                                                                                            |
| [28] | Q9BXX2 | Ankyrin repeat domain-containing protein 30B (Serologically defined breast cancer antigen NY-BR-1.1)                                                                   |
| [29] | Q8N283 | Ankyrin repeat domain-containing protein 35                                                                                                                            |
| [30] | Q8N9B4 | Ankyrin repeat domain-containing protein 42                                                                                                                            |
| [31] | Q9ULJ7 | Ankyrin repeat domain-containing protein 50                                                                                                                            |
| [32] | Q3KP44 | Ankyrin repeat domain-containing protein 55                                                                                                                            |
| [33] | Q9Y2G4 | Ankyrin repeat domain-containing protein 6 (Diversin)                                                                                                                  |
| [34] | A6NGH8 | Ankyrin repeat domain-containing protein 61                                                                                                                            |
| [35] | A6NC57 | Ankyrin repeat domain-containing protein 62                                                                                                                            |
| [36] | E5RJM6 | Ankyrin repeat domain-containing protein 65                                                                                                                            |
| [37] | B4E2M5 | Ankyrin repeat domain-containing protein 66                                                                                                                            |
| [38] | Q92527 | Ankyrin repeat domain-containing protein 7 (Testis-specific protein TSA806)                                                                                            |
| [39] | Q9BVC5 | Ashwin                                                                                                                                                                 |
| [40] | Q9NWT8 | Aurora kinase A-interacting protein (AURKA-interacting protein) (28S ribosomal protein S38, mitochondrial) (MRP-S38)                                                   |
| [41] | Q8NAA4 | Autophagy-related protein 16-2 (APG16-like 2) (WD repeat-containing protein 80)                                                                                        |
| [42] | Q9NSI6 | Bromodomain and WD repeat-containing protein 1 (WD repeat-containing protein 9)                                                                                        |
| [43] | Q6RI45 | Bromodomain and WD repeat-containing protein 3                                                                                                                         |
| [44] | Q8WUE5 | Cancer/testis antigen 55 (Tumor antigen BJ-HCC-20)                                                                                                                     |
| [45] | Q99467 | CD180 antigen (Lymphocyte antigen 64) (Radioprotective 105 kDa protein) (CD antigen CD180)                                                                             |
| [46] | Q86Y33 | Cell division cycle protein 20 homolog B                                                                                                                               |
| [47] | O15335 | Chondroadherin (Cartilage leucine-rich protein)                                                                                                                        |
| [48] | Q96MT7 | Cilia- and flagella-associated protein 44 (WD repeat-containing protein 52)                                                                                            |
| [49] | Q8N1V2 | Cilia- and flagella-associated protein 52 (WD repeat-containing protein 16) (WD40-repeat protein up-regulated in HCC)                                                  |
| [50] | Q96MR6 | Cilia- and flagella-associated protein 57 (WD repeat-containing protein 65)                                                                                            |
| [51] | O95170 | CMT1A duplicated region transcript 1 protein                                                                                                                           |
| [52] | Q8WUD4 | Coiled-coil domain-containing protein 12                                                                                                                               |
| [53] | Q8WZ74 | Cortactin-binding protein 2 (CortBP2)                                                                                                                                  |
| [54] | Q5QP82 | DDB1- and CUL4-associated factor 10 (WD repeat-containing protein 32)                                                                                                  |
| [55] | Q8TEB1 | DDB1- and CUL4-associated factor 11 (WD repeat-containing protein 23)                                                                                                  |
| [56] | Q96JK2 | DDB1- and CUL4-associated factor 5 (Breakpoint cluster region protein 2) (BCRP2) (WD repeat-containing protein 22)                                                     |
| [57] | A6NGE4 | DDB1- and CUL4-associated factor 8-like protein 1 (WD repeat-containing protein 42B)                                                                                   |
| [58] | P0C7V8 | DDB1- and CUL4-associated factor 8-like protein 2 (WD repeat-containing protein 42C)                                                                                   |
| [59] | Q14591 | Deleted.                                                                                                                                                               |
| [60] | Q9NZJ0 | Denticleless protein homolog (DDB1- and CUL4-associated factor 2) (Lethal(2) denticleless protein homolog) (Retinoic acid-regulated nuclear matrix-associated protein) |
| [61] | Q8N136 | Dynein assembly factor with WDR repeat domains 1 (Outer row dynein assembly protein 16 homolog) (WD repeat-containing protein 69)                                      |
| [62] | Q32P44 | Echinoderm microtubule-associated protein-like 3 (EMAP-3)                                                                                                              |
| [63] | Q9HC35 | Echinoderm microtubule-associated protein-like 4 (EMAP-4) (Restrictedly overexpressed proliferation-associated protein) (Ropp 120)                                     |
| [64] | Q6ZMW3 | Echinoderm microtubule-associated protein-like 6 (EMAP-6) (Echinoderm microtubule-associated                                                                           |

|       |        |                                                                                                                                                                                                                                                                                                   |
|-------|--------|---------------------------------------------------------------------------------------------------------------------------------------------------------------------------------------------------------------------------------------------------------------------------------------------------|
|       |        | protein-like 5-like)                                                                                                                                                                                                                                                                              |
| [65]  | Q8NDI1 | EH domain-binding protein 1                                                                                                                                                                                                                                                                       |
| [66]  | Q8N3D4 | EH domain-binding protein 1-like protein 1                                                                                                                                                                                                                                                        |
| [67]  | Q8TE02 | Elongator complex protein 5 (Dermal papilla-derived protein 6) (S-phase 2 protein)                                                                                                                                                                                                                |
| [68]  | P0CF75 | Endogenous Bornavirus-like nucleoprotein 1 (Endogenous Borna-like N element-1) (EBLN-1)                                                                                                                                                                                                           |
| [69]  | Q6P2I7 | Endogenous Bornavirus-like nucleoprotein 2 (Endogenous Borna-like N element-2) (EBLN-2)                                                                                                                                                                                                           |
| [70]  | Q6ZVH7 | Espin-like protein                                                                                                                                                                                                                                                                                |
| [71]  | Q5XX13 | F-box/WD repeat-containing protein 10 (F-box and WD-40 domain-containing protein 10) (Ubiquitin ligase-specificity factor)                                                                                                                                                                        |
| [72]  | P57775 | F-box/WD repeat-containing protein 4 (Dactylin) (F-box and WD-40 domain-containing protein 4)                                                                                                                                                                                                     |
| [73]  | Q8N3Y1 | F-box/WD repeat-containing protein 8 (F-box and WD-40 domain-containing protein 8) (F-box only protein 29)                                                                                                                                                                                        |
| [74]  | Q5XUX1 | F-box/WD repeat-containing protein 9 (F-box and WD-40 domain-containing protein 9)                                                                                                                                                                                                                |
| [75]  | Q8TC84 | Fibronectin type 3 and ankyrin repeat domains protein 1                                                                                                                                                                                                                                           |
| [76]  | Q9UM11 | Fizzy-related protein homolog (Fzr) (CDC20-like protein 1) (Cdh1/Hct1 homolog) (hCDH1)                                                                                                                                                                                                            |
| [77]  | Q8TAE8 | Growth arrest and DNA damage-inducible proteins-interacting protein 1 (39S ribosomal protein L59, mitochondrial) (MRP-L59) (CKII beta-associating protein) (CR6-interacting factor 1) (CRIF1) (Papillomavirus L2-interacting nuclear protein 1) (PLINP) (PLINP-1) (p53-responsive gene 6 protein) |
| [78]  | Q9BYB4 | Guanine nucleotide-binding protein subunit beta-like protein 1 (G protein subunit beta-like protein 1) (DGCRK3) (WD repeat-containing protein 14) (WD40 repeat-containing protein deleted in VCFS) (WDVCF)                                                                                        |
| [79]  | P26927 | Hepatocyte growth factor-like protein (Macrophage stimulatory protein) (Macrophage-stimulating protein) (MSP) [Cleaved into: Hepatocyte growth factor-like protein alpha chain; Hepatocyte growth factor-like protein beta chain]                                                                 |
| [80]  | O14498 | Immunoglobulin superfamily containing leucine-rich repeat protein                                                                                                                                                                                                                                 |
| [81]  | Q6UXK2 | Immunoglobulin superfamily containing leucine-rich repeat protein 2 (Leucine-rich repeat domain and immunoglobulin domain-containing axon extension protein)                                                                                                                                      |
| [82]  | Q6WRI0 | Immunoglobulin superfamily member 10 (IgSF10) (Calvaria mechanical force protein 608) (CMF608)                                                                                                                                                                                                    |
| [83]  | Q6UXH9 | Inactive serine protease PAMR1 (Peptidase domain-containing protein associated with muscle regeneration 1) (Regeneration-associated muscle protease homolog)                                                                                                                                      |
| [84]  | Q9HBG6 | Intraflagellar transport protein 122 homolog (WD repeat-containing protein 10) (WD repeat-containing protein 140)                                                                                                                                                                                 |
| [85]  | Q9P2H3 | Intraflagellar transport protein 80 homolog (WD repeat-containing protein 56)                                                                                                                                                                                                                     |
| [86]  | Q9Y283 | Inversin (Inversion of embryo turning homolog) (Nephrocystin-2)                                                                                                                                                                                                                                   |
| [87]  | Q9H9V9 | JmjC domain-containing protein 4 (Jumonji domain-containing protein 4)                                                                                                                                                                                                                            |
| [88]  | Q5T7N3 | KN motif and ankyrin repeat domain-containing protein 4 (Ankyrin repeat domain-containing protein 38)                                                                                                                                                                                             |
| [89]  | P02750 | Leucine-rich alpha-2-glycoprotein (LRG)                                                                                                                                                                                                                                                           |
| [90]  | Q9P244 | Leucine-rich repeat and fibronectin type III domain-containing protein 1 (Synaptic adhesion-like molecule 2)                                                                                                                                                                                      |
| [91]  | Q9ULH4 | Leucine-rich repeat and fibronectin type-III domain-containing protein 2 (Synaptic adhesion-like molecule 1)                                                                                                                                                                                      |
| [92]  | Q9BTN0 | Leucine-rich repeat and fibronectin type-III domain-containing protein 3 (Synaptic adhesion-like molecule 4)                                                                                                                                                                                      |
| [93]  | Q96NI6 | Leucine-rich repeat and fibronectin type-III domain-containing protein 5                                                                                                                                                                                                                          |
| [94]  | Q7L985 | Leucine-rich repeat and immunoglobulin-like domain-containing nogo receptor-interacting protein 2 (Leucine-rich repeat neuronal protein 3) (Leucine-rich repeat neuronal protein 6C)                                                                                                              |
| [95]  | P0C6S8 | Leucine-rich repeat and immunoglobulin-like domain-containing nogo receptor-interacting protein 3 (Leucine-rich repeat neuronal protein 2) (Leucine-rich repeat neuronal protein 6B)                                                                                                              |
| [96]  | Q6UY18 | Leucine-rich repeat and immunoglobulin-like domain-containing nogo receptor-interacting protein 4 (Leucine-rich repeat neuronal protein 6D)                                                                                                                                                       |
| [97]  | Q9HBL6 | Leucine-rich repeat and transmembrane domain-containing protein 1                                                                                                                                                                                                                                 |
| [98]  | Q8N967 | Leucine-rich repeat and transmembrane domain-containing protein 2                                                                                                                                                                                                                                 |
| [99]  | Q6UXK5 | Leucine-rich repeat neuronal protein 1 (Neuronal leucine-rich repeat protein 1) (NLRR-1)                                                                                                                                                                                                          |
| [100] | Q9H3W5 | Leucine-rich repeat neuronal protein 3 (Neuronal leucine-rich repeat protein 3) (NLRR-3)                                                                                                                                                                                                          |

|       |        |                                                                                                                                                                               |
|-------|--------|-------------------------------------------------------------------------------------------------------------------------------------------------------------------------------|
| [101] | Q86UE6 | Leucine-rich repeat transmembrane neuronal protein 1                                                                                                                          |
| [102] | O43300 | Leucine-rich repeat transmembrane neuronal protein 2 (Leucine-rich repeat neuronal 2 protein)                                                                                 |
| [103] | Q86VH5 | Leucine-rich repeat transmembrane neuronal protein 3                                                                                                                          |
| [104] | Q86VH4 | Leucine-rich repeat transmembrane neuronal protein 4                                                                                                                          |
| [105] | Q8N6Y2 | Leucine-rich repeat-containing protein 17 (p37NB)                                                                                                                             |
| [106] | Q50LG9 | Leucine-rich repeat-containing protein 24                                                                                                                                     |
| [107] | Q14392 | Leucine-rich repeat-containing protein 32 (Garpin) (Glycoprotein A repetitions predominant) (GARP)                                                                            |
| [108] | Q5VT99 | Leucine-rich repeat-containing protein 38 (BK channel auxiliary gamma subunit LRRC38)                                                                                         |
| [109] | Q8N9N7 | Leucine-rich repeat-containing protein 57                                                                                                                                     |
| [110] | Q6ZNP3 | Leucine-rich repeat-containing protein 69                                                                                                                                     |
| [111] | Q7Z2Q7 | Leucine-rich repeat-containing protein 70 (Synleucin)                                                                                                                         |
| [112] | Q96JA1 | Leucine-rich repeats and immunoglobulin-like domains protein 1 (LIG-1)                                                                                                        |
| [113] | O94898 | Leucine-rich repeats and immunoglobulin-like domains protein 2 (LIG-2)                                                                                                        |
| [114] | Q8N4S9 | MARVEL domain-containing protein 2 (Tricellulin)                                                                                                                              |
| [115] | O43684 | Mitotic checkpoint protein BUB3                                                                                                                                               |
| [116] | Q9ULI1 | NACHT and WD repeat domain-containing protein 2 (Leucine-rich repeat and WD repeat-containing protein KIAA1239)                                                               |
| [117] | Q86YC3 | Negative regulator of reactive oxygen species (Leucine-rich repeat-containing protein 33)                                                                                     |
| [118] | Q9NVX2 | Notchless protein homolog 1                                                                                                                                                   |
| [119] | Q8NFH5 | Nucleoporin NUP53 (35 kDa nucleoporin) (Mitotic phosphoprotein 44) (MP-44) (Nuclear pore complex protein Nup53) (Nucleoporin Nup35)                                           |
| [120] | Q9GZU5 | Nyctalopin                                                                                                                                                                    |
| [121] | Q9H607 | Occludin/ELL domain-containing protein 1                                                                                                                                      |
| [122] | P23515 | Oligodendrocyte-myelin glycoprotein                                                                                                                                           |
| [123] | Q99983 | Osteomodulin (Keratan sulfate proteoglycan osteomodulin) (KSPG osteomodulin) (Osteoadherin) (OSAD)                                                                            |
| [124] | Q9NWT1 | p21-activated protein kinase-interacting protein 1 (PAK/PLC-interacting protein 1) (hPIP1) (PAK1-interacting protein 1) (WD repeat-containing protein 84)                     |
| [125] | Q13610 | Periodic tryptophan protein 1 homolog (Keratinocyte protein IEF SSP 9502)                                                                                                     |
| [126] | P40197 | Platelet glycoprotein V (GPV) (Glycoprotein 5) (CD antigen CD42d)                                                                                                             |
| [127] | Q8NBT0 | POC1 centriolar protein homolog A (Pix2) (Proteome of centriole protein 1A) (WD repeat-containing protein 51A)                                                                |
| [128] | Q8TC44 | POC1 centriolar protein homolog B (Pix1) (Proteome of centriole protein 1B) (WD repeat-containing protein 51B)                                                                |
| [129] | P0CG47 | Polyubiquitin-B [Cleaved into: Ubiquitin]                                                                                                                                     |
| [130] | Q6S8J7 | POTE ankyrin domain family member A (ANKRD26-like family A member 1) (Prostate, ovary, testis-expressed protein on chromosome 8) (POTE-8)                                     |
| [131] | Q6S5H4 | POTE ankyrin domain family member B (ANKRD26-like family B member 1) (Prostate, ovary, testis-expressed protein on chromosome 15) (POTE-15)                                   |
| [132] | H3BUK9 | POTE ankyrin domain family member B2                                                                                                                                          |
| [133] | B2RU33 | POTE ankyrin domain family member C (ANKRD26-like family B member 2) (Prostate, ovary, testis-expressed protein on chromosome 18) (POTE-18)                                   |
| [134] | Q86YR6 | POTE ankyrin domain family member D (ANKRD26-like family B member 3) (Ankyrin repeat domain-containing protein 21) (Prostate, ovary, testis-expressed protein) (Protein POTE) |
| [135] | Q6S8J3 | POTE ankyrin domain family member E (ANKRD26-like family C member 1A) (Prostate, ovary, testis-expressed protein on chromosome 2) (POTE-2)                                    |
| [136] | A5A3E0 | POTE ankyrin domain family member F (ANKRD26-like family C member 1B) (Chimeric POTE-actin protein)                                                                           |
| [137] | Q6S5H5 | POTE ankyrin domain family member G (ANKRD26-like family C member 2) (Prostate, ovary, testis-expressed protein on chromosome 14) (POTE-14)                                   |
| [138] | Q6S545 | POTE ankyrin domain family member H (ANKRD26-like family C member 3) (Prostate, ovary, testis-expressed protein on chromosome 22) (POTE-22)                                   |
| [139] | P0CG38 | POTE ankyrin domain family member I                                                                                                                                           |

|       |        |                                                                                                                                                                                                                                                                  |
|-------|--------|------------------------------------------------------------------------------------------------------------------------------------------------------------------------------------------------------------------------------------------------------------------|
| [140] | P0CG39 | POTE ankyrin domain family member J                                                                                                                                                                                                                              |
| [141] | O76071 | Probable cytosolic iron-sulfur protein assembly protein CIAO1 (WD repeat-containing protein 39)                                                                                                                                                                  |
| [142] | Q9BRP4 | Proteasomal ATPase-associated factor 1 (Protein G-16) (WD repeat-containing protein 71)                                                                                                                                                                          |
| [143] | Q5T9C2 | Protein FAM102A (Early estrogen-induced gene 1 protein)                                                                                                                                                                                                          |
| [144] | Q5T8I3 | Protein FAM102B                                                                                                                                                                                                                                                  |
| [145] | Q8WUF8 | Protein FAM172A                                                                                                                                                                                                                                                  |
| [146] | Q9NSI2 | Protein FAM207A                                                                                                                                                                                                                                                  |
| [147] | Q96JP0 | Protein fem-1 homolog C (FEM1c) (FEM1-gamma)                                                                                                                                                                                                                     |
| [148] | Q14667 | Protein KIAA0100 (Antigen MLAA-22) (Breast cancer-overexpressed gene 1 protein)                                                                                                                                                                                  |
| [149] | Q8NHV4 | Protein NEDD1 (Neural precursor cell expressed developmentally down-regulated protein 1) (NEDD-1)                                                                                                                                                                |
| [150] | Q9H7Z3 | Protein NRDE2 homolog                                                                                                                                                                                                                                            |
| [151] | Q9BZL4 | Protein phosphatase 1 regulatory subunit 12C (Protein phosphatase 1 myosin-binding subunit of 85 kDa) (Protein phosphatase 1 myosin-binding subunit p85)                                                                                                         |
| [152] | Q14160 | Protein scribble homolog (Scribble) (hScrib) (Protein LAP4)                                                                                                                                                                                                      |
| [153] | P55735 | Protein SEC13 homolog (SEC13-like protein 1) (SEC13-related protein)                                                                                                                                                                                             |
| [154] | Q9C0D5 | Protein TANC1 (Tetratricopeptide repeat, ankyrin repeat and coiled-coil domain-containing protein 1)                                                                                                                                                             |
| [155] | Q53HC9 | Protein TSSC1 (Tumor-suppressing STF cDNA 1 protein) (Tumor-suppressing subchromosomal transferable fragment candidate gene 1 protein)                                                                                                                           |
| [156] | Q9NQ39 | Putative 40S ribosomal protein S10-like                                                                                                                                                                                                                          |
| [157] | Q9H560 | Putative ankyrin repeat domain-containing protein 19 (Ankyrin repeat domain-containing protein 19 pseudogene)                                                                                                                                                    |
| [158] | A7E2S9 | Putative ankyrin repeat domain-containing protein 30B-like                                                                                                                                                                                                       |
| [159] | Q8N7Z5 | Putative ankyrin repeat domain-containing protein 31                                                                                                                                                                                                             |
| [160] | P0C7Q3 | Putative cyclin-related protein FAM58B                                                                                                                                                                                                                           |
| [161] | A6NI47 | Putative POTE ankyrin domain family member M                                                                                                                                                                                                                     |
| [162] | A6NC97 | Putative protein FAM172B (FAM172B pseudogene)                                                                                                                                                                                                                    |
| [163] | Q9NSQ0 | Putative ribosomal RNA-processing protein 7 homolog B (Putative gastric cancer antigen Zg14-like protein)                                                                                                                                                        |
| [164] | O00472 | RNA polymerase II elongation factor ELL2                                                                                                                                                                                                                         |
| [165] | Q9H6T3 | RNA polymerase II-associated protein 3                                                                                                                                                                                                                           |
| [166] | Q8WVC0 | RNA polymerase-associated protein LEO1 (Replicative senescence down-regulated leo1-like protein)                                                                                                                                                                 |
| [167] | A6NKF1 | SAC3 domain-containing protein 1 (SAC3 homology domain-containing protein 1)                                                                                                                                                                                     |
| [168] | O15084 | Serine/threonine-protein phosphatase 6 regulatory ankyrin repeat subunit A (PP6-ARS-A) (Serine/threonine-protein phosphatase 6 regulatory subunit ARS-A) (Ankyrin repeat domain-containing protein 28) (Phosphatase interactor targeting protein hnRNP K) (PITK) |
| [169] | Q8N8A2 | Serine/threonine-protein phosphatase 6 regulatory ankyrin repeat subunit B (PP6-ARS-B) (Serine/threonine-protein phosphatase 6 regulatory subunit ARS-B) (Ankyrin repeat domain-containing protein 44)                                                           |
| [170] | Q8NB46 | Serine/threonine-protein phosphatase 6 regulatory ankyrin repeat subunit C (PP6-ARS-C) (Serine/threonine-protein phosphatase 6 regulatory subunit ARS-C) (Ankyrin repeat domain-containing protein 52)                                                           |
| [171] | Q9P1W8 | Signal-regulatory protein gamma (SIRP-gamma) (CD172 antigen-like family member B) (Signal-regulatory protein beta-2) (SIRP-b2) (SIRP-beta-2) (CD antigen CD172g)                                                                                                 |
| [172] | O94933 | SLIT and NTRK-like protein 3                                                                                                                                                                                                                                     |
| [173] | O94991 | SLIT and NTRK-like protein 5 (Leucine-rich repeat-containing protein 11)                                                                                                                                                                                         |
| [174] | Q8N0X2 | Sperm-associated antigen 16 protein (Pf20 protein homolog)                                                                                                                                                                                                       |
| [175] | Q9BVC4 | Target of rapamycin complex subunit LST8 (TORC subunit LST8) (G protein beta subunit-like) (Gable) (Protein GbetaL) (Mammalian lethal with SEC13 protein 8) (mLST8)                                                                                              |
| [176] | Q5UIP0 | Telomere-associated protein RIF1 (Rap1-interacting factor 1 homolog)                                                                                                                                                                                             |
| [177] | Q04726 | Transducin-like enhancer protein 3 (Enhancer of split groucho-like protein 3) (ESG3)                                                                                                                                                                             |
| [178] | Q9H808 | Transducin-like enhancer protein 6                                                                                                                                                                                                                               |
| [179] | Q13641 | Trophoblast glycoprotein (5T4 oncofetal antigen) (5T4 oncofetal trophoblast glycoprotein) (5T4                                                                                                                                                                   |

|       |        |                                                                                                                                                                                                                                                                                                                                                                                                                                                              |
|-------|--------|--------------------------------------------------------------------------------------------------------------------------------------------------------------------------------------------------------------------------------------------------------------------------------------------------------------------------------------------------------------------------------------------------------------------------------------------------------------|
|       |        | oncotrophoblast glycoprotein) (M6P1) (Wnt-activated inhibitory factor 1) (WAIF1)                                                                                                                                                                                                                                                                                                                                                                             |
| [180] | Q8WUA8 | Tsukushin (Tsukushi) (E2-induced gene 4 protein) (Leucine-rich repeat-containing protein 54)                                                                                                                                                                                                                                                                                                                                                                 |
| [181] | P78324 | Tyrosine-protein phosphatase non-receptor type substrate 1 (SHP substrate 1) (SHPS-1) (Brain Ig-like molecule with tyrosine-based activation motifs) (Bit) (CD172 antigen-like family member A) (Inhibitory receptor SHPS-1) (Macrophage fusion receptor) (MyD-1 antigen) (Signal-regulatory protein alpha-1) (Sirp-alpha-1) (Signal-regulatory protein alpha-2) (Sirp-alpha-2) (Signal-regulatory protein alpha-3) (Sirp-alpha-3) (p84) (CD antigen CD172a) |
| [182] | Q9BZF9 | Uveal autoantigen with coiled-coil domains and ankyrin repeats                                                                                                                                                                                                                                                                                                                                                                                               |
| [183] | Q6RSH7 | Von Hippel-Lindau-like protein (VHL-like protein) (VLP)                                                                                                                                                                                                                                                                                                                                                                                                      |
| [184] | Q9NYS7 | WD repeat and SOCS box-containing protein 2 (WSB-2) (CS box-containing WD protein)                                                                                                                                                                                                                                                                                                                                                                           |
| [185] | O75083 | WD repeat-containing protein 1 (Actin-interacting protein 1) (AIP1) (NORI-1)                                                                                                                                                                                                                                                                                                                                                                                 |
| [186] | Q9H1Z4 | WD repeat-containing protein 13                                                                                                                                                                                                                                                                                                                                                                                                                              |
| [187] | Q8IZU2 | WD repeat-containing protein 17                                                                                                                                                                                                                                                                                                                                                                                                                              |
| [188] | Q9BV38 | WD repeat-containing protein 18                                                                                                                                                                                                                                                                                                                                                                                                                              |
| [189] | Q64LD2 | WD repeat-containing protein 25                                                                                                                                                                                                                                                                                                                                                                                                                              |
| [190] | Q9H7D7 | WD repeat-containing protein 26 (CUL4- and DDB1-associated WDR protein 2) (Myocardial ischemic preconditioning up-regulated protein 2)                                                                                                                                                                                                                                                                                                                       |
| [191] | A2RRH5 | WD repeat-containing protein 27                                                                                                                                                                                                                                                                                                                                                                                                                              |
| [192] | Q8NA23 | WD repeat-containing protein 31                                                                                                                                                                                                                                                                                                                                                                                                                              |
| [193] | Q9Y2I8 | WD repeat-containing protein 37                                                                                                                                                                                                                                                                                                                                                                                                                              |
| [194] | Q5JTN6 | WD repeat-containing protein 38                                                                                                                                                                                                                                                                                                                                                                                                                              |
| [195] | O94967 | WD repeat-containing protein 47 (Neuronal enriched MAP-interacting protein) (Nemitin)                                                                                                                                                                                                                                                                                                                                                                        |
| [196] | Q8TAF3 | WD repeat-containing protein 48 (USP1-associated factor 1) (WD repeat endosomal protein) (p80)                                                                                                                                                                                                                                                                                                                                                               |
| [197] | Q8IV35 | WD repeat-containing protein 49                                                                                                                                                                                                                                                                                                                                                                                                                              |
| [198] | Q7Z5U6 | WD repeat-containing protein 53                                                                                                                                                                                                                                                                                                                                                                                                                              |
| [199] | Q9H6Y2 | WD repeat-containing protein 55                                                                                                                                                                                                                                                                                                                                                                                                                              |
| [200] | Q6PJI9 | WD repeat-containing protein 59                                                                                                                                                                                                                                                                                                                                                                                                                              |
| [201] | O43379 | WD repeat-containing protein 62                                                                                                                                                                                                                                                                                                                                                                                                                              |
| [202] | B1ANS9 | WD repeat-containing protein 64                                                                                                                                                                                                                                                                                                                                                                                                                              |
| [203] | Q9Y4E6 | WD repeat-containing protein 7 (Rabconnectin-3 beta) (TGF-beta resistance-associated protein TRAG)                                                                                                                                                                                                                                                                                                                                                           |
| [204] | Q3MJ13 | WD repeat-containing protein 72                                                                                                                                                                                                                                                                                                                                                                                                                              |
| [205] | Q86TI4 | WD repeat-containing protein 86                                                                                                                                                                                                                                                                                                                                                                                                                              |
| [206] | Q6ZMY6 | WD repeat-containing protein 88 (PQQ repeat and WD repeat-containing protein)                                                                                                                                                                                                                                                                                                                                                                                |
| [207] | Q96KV7 | WD repeat-containing protein 90                                                                                                                                                                                                                                                                                                                                                                                                                              |
| [208] | A4D1P6 | WD repeat-containing protein 91                                                                                                                                                                                                                                                                                                                                                                                                                              |
| [209] | A6NE52 | WD repeat-containing protein KIAA1875                                                                                                                                                                                                                                                                                                                                                                                                                        |
| [210] | Q2TAY7 | WD40 repeat-containing protein SMU1 (Smu-1 suppressor of mec-8 and unc-52 protein homolog) [Cleaved into: WD40 repeat-containing protein SMU1, N-terminally processed]                                                                                                                                                                                                                                                                                       |
| [211] | A6XGL0 | YjeF N-terminal domain-containing protein 3 (YjeF_N3) (hYjeF_N3)                                                                                                                                                                                                                                                                                                                                                                                             |
