# Supplementary material for: Genome-wide survey of putative RNA-binding proteins encoded in the human proteome
Source: Royal Society of Chemistry journal article supplement (doi:10.1039/c5mb00638d), 2015-11-30
Supplement: c5mb00638d1.zip [file c5mb00638d1.zip]

**Supplementary Table 4:** UniProt annotations for the putative RNA-binding proteins in the human genome.

| Entry  | Gene ontology (molecular function)                                                                                                                                                                                                                                                                                                                                                                                                                                                                                                                                                                                                                                                       |
|--------|------------------------------------------------------------------------------------------------------------------------------------------------------------------------------------------------------------------------------------------------------------------------------------------------------------------------------------------------------------------------------------------------------------------------------------------------------------------------------------------------------------------------------------------------------------------------------------------------------------------------------------------------------------------------------------------|
| Q13131 | [acetyl-CoA carboxylase] kinase activity [GO:0050405]; [hydroxymethylglutaryl-CoA reductase (NADPH)] kinase activity [GO:0047322]; AMP-activated protein kinase activity [GO:0004679]; ATP binding [GO:0005524]; cAMP-dependent protein kinase activity [GO:0004691]; chromatin binding [GO:0003682]; histone serine kinase activity [GO:0035174]; metal ion binding [GO:0046872]; protein kinase activity [GO:0004672]; tau-protein kinase activity [GO:0050321]                                                                                                                                                                                                                        |
| P54646 | [acetyl-CoA carboxylase] kinase activity [GO:0050405]; [hydroxymethylglutaryl-CoA reductase (NADPH)] kinase activity [GO:0047322]; AMP-activated protein kinase activity [GO:0004679]; ATP binding [GO:0005524]; chromatin binding [GO:0003682]; histone serine kinase activity [GO:0035174]; metal ion binding [GO:0046872]; protein kinase activity [GO:0004672]; protein serine/threonine/tyrosine kinase activity [GO:0004712]; protein serine/threonine kinase activity [GO:0004674]                                                                                                                                                                                                |
| Q8IZQ1 | 1-phosphatidylinositol binding [GO:0005545]; beta-N-acetylglucosaminylglycopeptide beta-1,4-galactosyltransferase activity [GO:0003831]; metal ion binding [GO:0046872]                                                                                                                                                                                                                                                                                                                                                                                                                                                                                                                  |
| Q8IWB7 | 1-phosphatidylinositol binding [GO:0005545]; zinc ion binding [GO:0008270]                                                                                                                                                                                                                                                                                                                                                                                                                                                                                                                                                                                                               |
| P57059 | 14-3-3 protein binding [GO:0071889]; ATP binding [GO:0005524]; cAMP response element binding protein binding [GO:0008140]; magnesium ion binding [GO:0000287]; protein kinase binding [GO:0019901]; protein serine/threonine kinase activity [GO:0004674]                                                                                                                                                                                                                                                                                                                                                                                                                                |
| P31749 | 14-3-3 protein binding [GO:0071889]; ATP binding [GO:0005524]; enzyme binding [GO:0019899]; identical protein binding [GO:0042802]; kinase activity [GO:0016301]; nitric-oxide synthase regulator activity [GO:0030235]; phosphatidylinositol-3,4,5-trisphosphate binding [GO:0005547]; phosphatidylinositol-3,4-bisphosphate binding [GO:0043325]; protein kinase activity [GO:0004672]; protein serine/threonine/tyrosine kinase activity [GO:0004712]; protein serine/threonine kinase activity [GO:0004674]                                                                                                                                                                          |
| P26651 | 14-3-3 protein binding [GO:0071889]; AU-rich element binding [GO:0017091]; C-C chemokine binding [GO:0019957]; DNA binding [GO:0003677]; enzyme binding [GO:0019899]; metal ion binding [GO:0046872]; mRNA 3'-UTR AU-rich region binding [GO:0035925]; mRNA binding [GO:0003729]; poly(A) RNA binding [GO:0044822]; protein kinase binding [GO:0019901]; single-stranded RNA binding [GO:0003727]                                                                                                                                                                                                                                                                                        |
| O14974 | 14-3-3 protein binding [GO:0071889]; enzyme inhibitor activity [GO:0004857]; phosphatase regulator activity [GO:0019208]; protein kinase binding [GO:0019901]; signal transducer activity [GO:0004871]                                                                                                                                                                                                                                                                                                                                                                                                                                                                                   |
| O15439 | 15-hydroxyprostaglandin dehydrogenase (NAD+) activity [GO:0016404]; ATPase activity, coupled to transmembrane movement of substances [GO:0042626]; ATP binding [GO:0005524]                                                                                                                                                                                                                                                                                                                                                                                                                                                                                                              |
| Q9UNQ2 | 18S rRNA (adenine(1779)-N(6)/adenine(1780)-N(6))-dimethyltransferase activity [GO:0052909]; poly(A) RNA binding [GO:0044822]; rRNA (adenine-N6,N6-)-dimethyltransferase activity [GO:0000179]                                                                                                                                                                                                                                                                                                                                                                                                                                                                                            |
| Q9Y6K5 | 2'-5'-oligoadenylate synthetase activity [GO:0001730]; ATP binding [GO:0005524]; double-stranded RNA binding [GO:0003725]; metal ion binding [GO:0046872]                                                                                                                                                                                                                                                                                                                                                                                                                                                                                                                                |
| P00973 | 2'-5'-oligoadenylate synthetase activity [GO:0001730]; ATP binding [GO:0005524]; double-stranded RNA binding [GO:0003725]; metal ion binding [GO:0046872]; zinc ion binding [GO:0008270]                                                                                                                                                                                                                                                                                                                                                                                                                                                                                                 |
| P29728 | 2'-5'-oligoadenylate synthetase activity [GO:0001730]; ATP binding [GO:0005524]; double-stranded RNA binding [GO:0003725]; metal ion binding [GO:0046872]; zinc ion binding [GO:0008270]                                                                                                                                                                                                                                                                                                                                                                                                                                                                                                 |
| P09543 | 2',3'-cyclic-nucleotide 3'-phosphodiesterase activity [GO:0004113]; cyclic nucleotide binding [GO:0030551]; RNA binding [GO:0003723]                                                                                                                                                                                                                                                                                                                                                                                                                                                                                                                                                     |
| Q99798 | 3 iron, 4 sulfur cluster binding [GO:0051538]; 4 iron, 4 sulfur cluster binding [GO:0051539]; aconitate hydratase activity [GO:0003994]; iron ion binding [GO:0005506]                                                                                                                                                                                                                                                                                                                                                                                                                                                                                                                   |
| O15530 | 3-phosphoinositide-dependent protein kinase activity [GO:0004676]; ATP binding [GO:0005524]; phospholipase activator activity [GO:0016004]; phospholipase binding [GO:0043274]; protein serine/threonine kinase activity [GO:0004674]                                                                                                                                                                                                                                                                                                                                                                                                                                                    |
| Q14191 | 3'-5' DNA helicase activity [GO:0043138]; 3'-5' exonuclease activity [GO:0008408]; ATPase activity [GO:0016887]; ATP binding [GO:0005524]; ATP-dependent 3'-5' DNA helicase activity [GO:0043140]; ATP-dependent DNA helicase activity [GO:0004003]; bubble DNA binding [GO:0000405]; DNA binding [GO:0003677]; DNA helicase activity [GO:0003678]; exonuclease activity [GO:0004527]; four-way junction helicase activity [GO:0009378]; G-quadruplex DNA binding [GO:0051880]; helicase activity [GO:0004386]; magnesium ion binding [GO:0000287]; manganese ion binding [GO:0030145]; protein complex binding [GO:0032403]; protein homodimerization activity [GO:0042803]; Y-form DNA |

|        |                                                                                                                                                                                                                                                                                                                                                                          |
|--------|--------------------------------------------------------------------------------------------------------------------------------------------------------------------------------------------------------------------------------------------------------------------------------------------------------------------------------------------------------------------------|
|        | binding [GO:0000403]                                                                                                                                                                                                                                                                                                                                                     |
| Q8IV48 | 3'-5' exonuclease activity [GO:0008408]; 3'-5'-exoribonuclease activity [GO:0000175]; histone pre-mRNA stem-loop binding [GO:0071207]; metal ion binding [GO:0046872]; ribosome binding [GO:0043022]; rRNA binding [GO:0019843]                                                                                                                                          |
| Q9Y3B8 | 3'-5' exonuclease activity [GO:0008408]; 3'-5'-exoribonuclease activity [GO:0000175]; nucleic acid binding [GO:0003676]                                                                                                                                                                                                                                                  |
| Q01780 | 3'-5' exonuclease activity [GO:0008408]; exoribonuclease activity [GO:0004532]; nucleotide binding [GO:0000166]; poly(A) RNA binding [GO:0044822]                                                                                                                                                                                                                        |
| Q8N9H8 | 3'-5' exonuclease activity [GO:0008408]; metal ion binding [GO:0046872]; nucleic acid binding [GO:0003676]                                                                                                                                                                                                                                                               |
| Q9NVH0 | 3'-5' exonuclease activity [GO:0008408]; nucleic acid binding [GO:0003676]                                                                                                                                                                                                                                                                                               |
| Q8IYB8 | 3'-5' RNA helicase activity [GO:0034458]; ATP binding [GO:0005524]; ATP-dependent RNA helicase activity [GO:0004004]; DNA binding [GO:0003677]; DNA helicase activity [GO:0003678]; double-stranded RNA binding [GO:0003725]; helicase activity [GO:0004386]; poly(A) RNA binding [GO:0044822]; protein homodimerization activity [GO:0042803]; RNA binding [GO:0003723] |
| Q13868 | 3'-5'-exoribonuclease activity [GO:0000175]; 7S RNA binding [GO:0008312]                                                                                                                                                                                                                                                                                                 |
| Q9NPD3 | 3'-5'-exoribonuclease activity [GO:0000175]; AU-rich element binding [GO:0017091]                                                                                                                                                                                                                                                                                        |
| Q06265 | 3'-5'-exoribonuclease activity [GO:0000175]; AU-rich element binding [GO:0017091]; poly(A) RNA binding [GO:0044822]; RNA binding [GO:0003723]                                                                                                                                                                                                                            |
| Q9Y2L1 | 3'-5'-exoribonuclease activity [GO:0000175]; endonuclease activity [GO:0004519]; guanyl-nucleotide exchange factor activity [GO:0005085]; RNA binding [GO:0003723]                                                                                                                                                                                                       |
| Q8TF46 | 3'-5'-exoribonuclease activity [GO:0000175]; enzyme binding [GO:0019899]; RNA binding [GO:0003723]                                                                                                                                                                                                                                                                       |
| Q96AZ6 | 3'-5'-exoribonuclease activity [GO:0000175]; exonuclease activity [GO:0004527]; exoribonuclease II activity [GO:0008859]; metal ion binding [GO:0046872]; single-stranded DNA 3'-5' exodeoxyribonuclease activity [GO:0008310]; U1 snRNA binding [GO:0030619]; U2 snRNA binding [GO:0030620]; U3 snoRNA binding [GO:0034511]                                             |
| Q9UIV1 | 3'-5'-exoribonuclease activity [GO:0000175]; exoribonuclease activity [GO:0004532]; metal ion binding [GO:0046872]; poly(A)-specific ribonuclease activity [GO:0004535]; RNA binding [GO:0003723]; signal transducer activity [GO:0004871]; transcription factor activity, sequence-specific DNA binding [GO:0003700]                                                    |
| Q8IYB7 | 3'-5'-exoribonuclease activity [GO:0000175]; magnesium ion binding [GO:0000287]; poly(U) RNA binding [GO:0008266]; ribonuclease activity [GO:0004540]                                                                                                                                                                                                                    |
| Q96GM8 | 3'-5'-exoribonuclease activity [GO:0000175]; metal ion binding [GO:0046872]; nucleic acid binding [GO:0003676]; poly(A)-specific ribonuclease activity [GO:0004535]                                                                                                                                                                                                      |
| O43414 | 3'-5'-exoribonuclease activity [GO:0000175]; metal ion binding [GO:0046872]; poly(A) RNA binding [GO:0044822]                                                                                                                                                                                                                                                            |
| Q9UFF9 | 3'-5'-exoribonuclease activity [GO:0000175]; metal ion binding [GO:0046872]; poly(A)-specific ribonuclease activity [GO:0004535]; RNA binding [GO:0003723]; transcription factor activity, sequence-specific DNA binding [GO:0003700]                                                                                                                                    |
| Q8TCS8 | 3'-5'-exoribonuclease activity [GO:0000175]; miRNA binding [GO:0035198]; poly(A) RNA binding [GO:0044822]; poly(G) binding [GO:0034046]; poly(U) RNA binding [GO:0008266]; polyribonucleotide nucleotidyltransferase activity [GO:0004654]                                                                                                                               |
| Q504Q3 | 3'-5'-exoribonuclease activity [GO:0000175]; nucleic acid binding [GO:0003676]; poly(A)-specific ribonuclease activity [GO:0004535]                                                                                                                                                                                                                                      |
| A8K979 | 3'-5'-exoribonuclease activity [GO:0000175]; nucleic acid binding [GO:0003676]; zinc ion binding [GO:0008270]                                                                                                                                                                                                                                                            |
| Q15024 | 3'-5'-exoribonuclease activity [GO:0000175]; RNA binding [GO:0003723]                                                                                                                                                                                                                                                                                                    |
| Q9NQT4 | 3'-5'-exoribonuclease activity [GO:0000175]; RNA binding [GO:0003723]                                                                                                                                                                                                                                                                                                    |
| Q9H777 | 3'-tRNA processing endoribonuclease activity [GO:0042781]; metal ion binding [GO:0046872]                                                                                                                                                                                                                                                                                |
| Q9BQ52 | 3'-tRNA processing endoribonuclease activity [GO:0042781]; metal ion binding [GO:0046872]; poly(A) RNA binding [GO:0044822]                                                                                                                                                                                                                                              |
| P21399 | 4 iron, 4 sulfur cluster binding [GO:0051539]; aconitate hydratase activity [GO:0003994]; iron-responsive element binding [GO:0030350]; metal ion binding [GO:0046872]; RNA binding [GO:0003723]                                                                                                                                                                         |
| P49643 | 4 iron, 4 sulfur cluster binding [GO:0051539]; DNA binding [GO:0003677]; DNA primase activity [GO:0003896]; metal ion binding [GO:0046872]                                                                                                                                                                                                                               |

|        |                                                                                                                                                                                                                                                                                                                                                                                                                                                                                                                                                                                                                                                                                                                                                                                                                                                                                                                                                                                           |
|--------|-------------------------------------------------------------------------------------------------------------------------------------------------------------------------------------------------------------------------------------------------------------------------------------------------------------------------------------------------------------------------------------------------------------------------------------------------------------------------------------------------------------------------------------------------------------------------------------------------------------------------------------------------------------------------------------------------------------------------------------------------------------------------------------------------------------------------------------------------------------------------------------------------------------------------------------------------------------------------------------------|
| Q9H790 | 4 iron, 4 sulfur cluster binding [GO:0051539]; DNA binding [GO:0003677]; metal ion binding [GO:0046872]; protein homodimerization activity [GO:0042803]; single-stranded DNA 3'-5' exodeoxyribonuclease activity [GO:0008310]; single-stranded DNA 5'-3' exodeoxyribonuclease activity [GO:0045145]                                                                                                                                                                                                                                                                                                                                                                                                                                                                                                                                                                                                                                                                                       |
| Q6NUM6 | 4 iron, 4 sulfur cluster binding [GO:0051539]; FMN binding [GO:0010181]; iron ion binding [GO:0005506]; lyase activity [GO:0016829]; oxidoreductase activity [GO:0016491]                                                                                                                                                                                                                                                                                                                                                                                                                                                                                                                                                                                                                                                                                                                                                                                                                 |
| Q9NV66 | 4 iron, 4 sulfur cluster binding [GO:0051539]; FMN binding [GO:0010181]; iron ion binding [GO:0005506]; lyase activity [GO:0016829]; oxidoreductase activity [GO:0016491]                                                                                                                                                                                                                                                                                                                                                                                                                                                                                                                                                                                                                                                                                                                                                                                                                 |
| P48200 | 4 iron, 4 sulfur cluster binding [GO:0051539]; iron-responsive element binding [GO:0030350]; metal ion binding [GO:0046872]; RNA binding [GO:0003723]; translation repressor activity [GO:0030371]                                                                                                                                                                                                                                                                                                                                                                                                                                                                                                                                                                                                                                                                                                                                                                                        |
| Q9H0D6 | 5'-3' exonuclease activity [GO:0008409]; 5'-3' exoribonuclease activity [GO:0004534]; nuclease activity [GO:0004518]; poly(A) RNA binding [GO:0044822]; transcription termination site sequence-specific DNA binding [GO:0001147]; zinc ion binding [GO:0008270]                                                                                                                                                                                                                                                                                                                                                                                                                                                                                                                                                                                                                                                                                                                          |
| Q8IZH2 | 5'-3' exonuclease activity [GO:0008409]; DNA binding [GO:0003677]; poly(A) RNA binding [GO:0044822]                                                                                                                                                                                                                                                                                                                                                                                                                                                                                                                                                                                                                                                                                                                                                                                                                                                                                       |
| Q9UKF6 | 5'-3' exonuclease activity [GO:0008409]; endoribonuclease activity [GO:0004521]; metal ion binding [GO:0046872]; RNA binding [GO:0003723]                                                                                                                                                                                                                                                                                                                                                                                                                                                                                                                                                                                                                                                                                                                                                                                                                                                 |
| O77932 | 5'-3' exonuclease activity [GO:0008409]; magnesium ion binding [GO:0000287]; mRNA binding [GO:0003729]; nucleotide binding [GO:0000166]; RNA pyrophosphohydrolase activity [GO:0034353]                                                                                                                                                                                                                                                                                                                                                                                                                                                                                                                                                                                                                                                                                                                                                                                                   |
| O75417 | 5'-deoxyribose-5-phosphate lyase activity [GO:0051575]; ATP binding [GO:0005524]; chromatin binding [GO:0003682]; damaged DNA binding [GO:0003684]; DNA-directed DNA polymerase activity [GO:0003887]; single-stranded DNA-dependent ATPase activity [GO:0043142]                                                                                                                                                                                                                                                                                                                                                                                                                                                                                                                                                                                                                                                                                                                         |
| O95551 | 5'-tyrosyl-DNA phosphodiesterase activity [GO:0070260]; magnesium ion binding [GO:0000287]; manganese ion binding [GO:0030145]; nuclease activity [GO:0004518]; single-stranded DNA binding [GO:0003697]; transcription corepressor activity [GO:0003714]; tyrosyl-RNA phosphodiesterase activity [GO:0036317]                                                                                                                                                                                                                                                                                                                                                                                                                                                                                                                                                                                                                                                                            |
| P46777 | 5S rRNA binding [GO:0008097]; poly(A) RNA binding [GO:0044822]; RNA binding [GO:0003723]; structural constituent of ribosome [GO:0003735]                                                                                                                                                                                                                                                                                                                                                                                                                                                                                                                                                                                                                                                                                                                                                                                                                                                 |
| P61011 | 7S RNA binding [GO:0008312]; drug binding [GO:0008144]; endoplasmic reticulum signal peptide binding [GO:0030942]; GDP binding [GO:0019003]; GTPase activity [GO:0003924]; GTP binding [GO:0005525]; poly(A) RNA binding [GO:0044822]; ribonucleoprotein complex binding [GO:0043021]                                                                                                                                                                                                                                                                                                                                                                                                                                                                                                                                                                                                                                                                                                     |
| P37108 | 7S RNA binding [GO:0008312]; endoplasmic reticulum signal peptide binding [GO:0030942]; poly(A) RNA binding [GO:0044822]; RNA binding [GO:0003723]                                                                                                                                                                                                                                                                                                                                                                                                                                                                                                                                                                                                                                                                                                                                                                                                                                        |
| Q9UHB9 | 7S RNA binding [GO:0008312]; endoplasmic reticulum signal peptide binding [GO:0030942]; poly(A) RNA binding [GO:0044822]; signal recognition particle binding [GO:0005047]; signal sequence binding [GO:0005048]                                                                                                                                                                                                                                                                                                                                                                                                                                                                                                                                                                                                                                                                                                                                                                          |
| P09132 | 7S RNA binding [GO:0008312]; poly(A) RNA binding [GO:0044822]                                                                                                                                                                                                                                                                                                                                                                                                                                                                                                                                                                                                                                                                                                                                                                                                                                                                                                                             |
| O76094 | 7S RNA binding [GO:0008312]; poly(A) RNA binding [GO:0044822]; signal recognition particle binding [GO:0005047]                                                                                                                                                                                                                                                                                                                                                                                                                                                                                                                                                                                                                                                                                                                                                                                                                                                                           |
| P49458 | 7S RNA binding [GO:0008312]; RNA binding [GO:0003723]; signal recognition particle binding [GO:0005047]                                                                                                                                                                                                                                                                                                                                                                                                                                                                                                                                                                                                                                                                                                                                                                                                                                                                                   |
| Q9NR30 | 7SK snRNA binding [GO:0097322]; ATP binding [GO:0005524]; ATP-dependent RNA helicase activity [GO:0004004]; double-stranded RNA binding [GO:0003725]; poly(A) RNA binding [GO:0044822]; rRNA binding [GO:0019843]; snoRNA binding [GO:0030515]                                                                                                                                                                                                                                                                                                                                                                                                                                                                                                                                                                                                                                                                                                                                            |
| Q00535 | acetylcholine receptor activator activity [GO:0030549]; ATP binding [GO:0005524]; cyclin-dependent protein serine/threonine kinase activity [GO:0004693]; ErbB-2 class receptor binding [GO:0005176]; ErbB-3 class receptor binding [GO:0043125]; kinase activity [GO:0016301]; protein kinase activity [GO:0004672]; protein serine/threonine kinase activity [GO:0004674]; tau-protein kinase activity [GO:0050321]                                                                                                                                                                                                                                                                                                                                                                                                                                                                                                                                                                     |
| Q09472 | acetyltransferase activity [GO:0016407]; activating transcription factor binding [GO:0033613]; androgen receptor binding [GO:0050681]; antigen binding [GO:0003823]; beta-catenin binding [GO:0008013]; chromatin binding [GO:0003682]; chromatin DNA binding [GO:0031490]; core promoter binding [GO:0001047]; damaged DNA binding [GO:0003684]; DNA binding [GO:0003677]; histone acetyltransferase activity [GO:0004402]; lysine N-acetyltransferase activity, acting on acetyl phosphate as donor [GO:0004468]; nuclear hormone receptor binding [GO:0035257]; pre-mRNA intronic binding [GO:0097157]; protein C-terminus binding [GO:0008022]; RNA polymerase II activating transcription factor binding [GO:0001102]; RNA polymerase II core promoter proximal region sequence-specific DNA binding [GO:0000978]; RNA polymerase II core promoter sequence-specific DNA binding [GO:0000979]; transcriptional activator activity, RNA polymerase II transcription regulatory region |

|        |                                                                                                                                                                                                                                                                                                                                                                                                                                                                                                                                                                                                                                                                                                                                                                                                                                                                                                                                                                                                                                                                                                                                                                                            |
|--------|--------------------------------------------------------------------------------------------------------------------------------------------------------------------------------------------------------------------------------------------------------------------------------------------------------------------------------------------------------------------------------------------------------------------------------------------------------------------------------------------------------------------------------------------------------------------------------------------------------------------------------------------------------------------------------------------------------------------------------------------------------------------------------------------------------------------------------------------------------------------------------------------------------------------------------------------------------------------------------------------------------------------------------------------------------------------------------------------------------------------------------------------------------------------------------------------|
|        | sequence-specific binding [GO:0001228]; transcription coactivator activity [GO:0003713]; transcription factor binding [GO:0008134]; transferase activity, transferring acyl groups [GO:0016746]; zinc ion binding [GO:0008270]                                                                                                                                                                                                                                                                                                                                                                                                                                                                                                                                                                                                                                                                                                                                                                                                                                                                                                                                                             |
| Q92793 | acetyltransferase activity [GO:0016407]; chromatin binding [GO:0003682]; core promoter proximal region sequence-specific DNA binding [GO:0000987]; damaged DNA binding [GO:0003684]; histone acetyltransferase activity [GO:0004402]; MRF binding [GO:0043426]; p53 binding [GO:0002039]; RNA polymerase II activating transcription factor binding [GO:0001102]; RNA polymerase II regulatory region sequence-specific DNA binding [GO:0000977]; RNA polymerase II transcription coactivator activity [GO:0001105]; RNA polymerase II transcription factor binding [GO:0001085]; signal transducer activity [GO:0004871]; transcriptional activator activity, RNA polymerase II transcription regulatory region sequence-specific binding [GO:0001228]; transcriptional repressor activity, RNA polymerase II core promoter proximal region sequence-specific binding [GO:0001078]; transcriptional repressor activity, RNA polymerase II transcription factor binding [GO:0001191]; transcription coactivator activity [GO:0003713]; transcription factor activity, sequence-specific DNA binding [GO:0003700]; transcription factor binding [GO:0008134]; zinc ion binding [GO:0008270] |
| Q9H7Z6 | acetyltransferase activity [GO:0016407]; histone acetyltransferase activity [GO:0004402]; metal ion binding [GO:0046872]; methylated histone binding [GO:0035064]; transcription factor binding [GO:0008134]                                                                                                                                                                                                                                                                                                                                                                                                                                                                                                                                                                                                                                                                                                                                                                                                                                                                                                                                                                               |
| P57737 | actin binding [GO:0003779]                                                                                                                                                                                                                                                                                                                                                                                                                                                                                                                                                                                                                                                                                                                                                                                                                                                                                                                                                                                                                                                                                                                                                                 |
| Q9UQ03 | actin binding [GO:0003779]; actin filament binding [GO:0051015]                                                                                                                                                                                                                                                                                                                                                                                                                                                                                                                                                                                                                                                                                                                                                                                                                                                                                                                                                                                                                                                                                                                            |
| P31146 | actin binding [GO:0003779]; actin filament binding [GO:0051015]; actin monomer binding [GO:0003785]; cytoskeletal protein binding [GO:0008092]; myosin heavy chain binding [GO:0032036]; phosphatidylinositol 3-kinase binding [GO:0043548]; poly(A) RNA binding [GO:0044822]; protein C-terminus binding [GO:0008022]; protein homodimerization activity [GO:0042803]                                                                                                                                                                                                                                                                                                                                                                                                                                                                                                                                                                                                                                                                                                                                                                                                                     |
| Q969V6 | actin binding [GO:0003779]; actin monomer binding [GO:0003785]; leucine zipper domain binding [GO:0043522]; RNA polymerase II transcription coactivator activity [GO:0001105]; transcription coactivator activity [GO:0003713]; transcription factor activity, sequence-specific DNA binding [GO:0003700]; transcription regulatory region sequence-specific DNA binding [GO:0000976]                                                                                                                                                                                                                                                                                                                                                                                                                                                                                                                                                                                                                                                                                                                                                                                                      |
| Q5S007 | actin binding [GO:0003779]; ATP binding [GO:0005524]; clathrin binding [GO:0030276]; glycoprotein binding [GO:0001948]; GTPase activator activity [GO:0005096]; GTPase activity [GO:0003924]; GTP binding [GO:0005525]; GTP-dependent protein kinase activity [GO:0034211]; identical protein binding [GO:0042802]; ion channel binding [GO:0044325]; kinase activity [GO:0016301]; MAP kinase kinase activity [GO:0004708]; peroxidase inhibitor activity [GO:0036479]; protein homodimerization activity [GO:0042803]; protein kinase A binding [GO:0051018]; protein kinase activity [GO:0004672]; protein serine/threonine kinase activity [GO:0004674]; Rho GTPase binding [GO:0017048]; SNARE binding [GO:0000149]; syntaxin-1 binding [GO:0017075]; tubulin binding [GO:0015631]                                                                                                                                                                                                                                                                                                                                                                                                    |
| Q6QEF8 | actin filament binding [GO:0051015]                                                                                                                                                                                                                                                                                                                                                                                                                                                                                                                                                                                                                                                                                                                                                                                                                                                                                                                                                                                                                                                                                                                                                        |
| Q92828 | actin filament binding [GO:0051015]                                                                                                                                                                                                                                                                                                                                                                                                                                                                                                                                                                                                                                                                                                                                                                                                                                                                                                                                                                                                                                                                                                                                                        |
| Q9ULV4 | actin filament binding [GO:0051015]                                                                                                                                                                                                                                                                                                                                                                                                                                                                                                                                                                                                                                                                                                                                                                                                                                                                                                                                                                                                                                                                                                                                                        |
| Q9BR76 | actin filament binding [GO:0051015]; Arp2/3 complex binding [GO:0071933]; identical protein binding [GO:0042802]                                                                                                                                                                                                                                                                                                                                                                                                                                                                                                                                                                                                                                                                                                                                                                                                                                                                                                                                                                                                                                                                           |
| Q9Y6X6 | actin filament binding [GO:0051015]; ATP binding [GO:0005524]; motor activity [GO:0003774]                                                                                                                                                                                                                                                                                                                                                                                                                                                                                                                                                                                                                                                                                                                                                                                                                                                                                                                                                                                                                                                                                                 |
| B1AK53 | actin filament binding [GO:0051015]; SH3 domain binding [GO:0017124]                                                                                                                                                                                                                                                                                                                                                                                                                                                                                                                                                                                                                                                                                                                                                                                                                                                                                                                                                                                                                                                                                                                       |
| Q02156 | actin monomer binding [GO:0003785]; ATP binding [GO:0005524]; calcium-independent protein kinase C activity [GO:0004699]; enzyme activator activity [GO:0008047]; enzyme binding [GO:0019899]; ethanol binding [GO:0035276]; metal ion binding [GO:0046872]; protein kinase C activity [GO:0004697]; protein serine/threonine kinase activity [GO:0004674]; receptor activator activity [GO:0030546]; signal transducer activity [GO:0004871]                                                                                                                                                                                                                                                                                                                                                                                                                                                                                                                                                                                                                                                                                                                                              |
| Q8NEV4 | actin-dependent ATPase activity [GO:0030898]; ADP binding [GO:0043531]; ATP binding [GO:0005524]; calmodulin binding [GO:0005516]; microfilament motor activity [GO:0000146]; plus-end directed microfilament motor activity [GO:0060002]; protein kinase activity [GO:0004672]; protein serine/threonine kinase activity [GO:0004674]                                                                                                                                                                                                                                                                                                                                                                                                                                                                                                                                                                                                                                                                                                                                                                                                                                                     |
| Q04206 | actinin binding [GO:0042805]; activating transcription factor binding [GO:0033613]; chromatin binding [GO:0003682]; chromatin DNA binding [GO:0031490]; DNA binding [GO:0003677]; histone deacetylase binding [GO:0042826]; identical protein binding [GO:0042802]; NF-kappaB binding [GO:0051059]; phosphate ion binding [GO:0042301]; protein heterodimerization activity [GO:0046982]; protein homodimerization activity [GO:0042803]; protein kinase binding [GO:0019901]; protein N-                                                                                                                                                                                                                                                                                                                                                                                                                                                                                                                                                                                                                                                                                                  |

|        |                                                                                                                                                                                                                                                                                                                                                                                                                                                                                                                                                                                                                                                                                                                                                                                                                                                                                                                                                                                                                                                             |
|--------|-------------------------------------------------------------------------------------------------------------------------------------------------------------------------------------------------------------------------------------------------------------------------------------------------------------------------------------------------------------------------------------------------------------------------------------------------------------------------------------------------------------------------------------------------------------------------------------------------------------------------------------------------------------------------------------------------------------------------------------------------------------------------------------------------------------------------------------------------------------------------------------------------------------------------------------------------------------------------------------------------------------------------------------------------------------|
|        | terminus binding [GO:0047485]; repressing transcription factor binding [GO:0070491]; RNA polymerase II core promoter proximal region sequence-specific DNA binding [GO:0000978]; RNA polymerase II distal enhancer sequence-specific DNA binding [GO:0000980]; RNA polymerase II regulatory region sequence-specific DNA binding [GO:0000977]; transcriptional activator activity, RNA polymerase II core promoter proximal region sequence-specific binding [GO:0001077]; transcriptional activator activity, RNA polymerase II distal enhancer sequence-specific binding [GO:0001205]; transcriptional repressor activity, RNA polymerase II core promoter proximal region sequence-specific binding [GO:0001078]; transcription factor activity, RNA polymerase II distal enhancer sequence-specific binding [GO:0003705]; transcription factor activity, sequence-specific DNA binding [GO:0003700]; transcription factor binding [GO:0008134]; transcription regulatory region DNA binding [GO:0044212]; ubiquitin protein ligase binding [GO:0031625] |
| P19838 | actinin binding [GO:0042805]; chromatin binding [GO:0003682]; double-stranded DNA binding [GO:0003690]; identical protein binding [GO:0042802]; protein heterodimerization activity [GO:0046982]; regulatory region DNA binding [GO:0000975]; RNA polymerase II distal enhancer sequence-specific DNA binding [GO:0000980]; RNA polymerase II regulatory region sequence-specific DNA binding [GO:0000977]; transcriptional activator activity, RNA polymerase II distal enhancer sequence-specific binding [GO:0001205]; transcriptional repressor activity, RNA polymerase II transcription regulatory region sequence-specific binding [GO:0001227]; transcription factor activity, sequence-specific DNA binding [GO:0003700]; transcription factor binding [GO:0008134]; transcription regulatory region DNA binding [GO:0044212]; transcription regulatory region sequence-specific DNA binding [GO:0000976]                                                                                                                                          |
| Q9HAZ2 | activating transcription factor binding [GO:0033613]; metal ion binding [GO:0046872]; sequence-specific DNA binding [GO:0043565]; transcription coactivator activity [GO:0003713]                                                                                                                                                                                                                                                                                                                                                                                                                                                                                                                                                                                                                                                                                                                                                                                                                                                                           |
| P36896 | activin receptor activity, type I [GO:0016361]; ATP binding [GO:0005524]; inhibin binding [GO:0034711]; metal ion binding [GO:0046872]; protein serine/threonine kinase activity [GO:0004674]; receptor signaling protein serine/threonine kinase activity [GO:0004702]; SMAD binding [GO:0046332]; transmembrane receptor protein serine/threonine kinase activity [GO:0004675]; ubiquitin protein ligase binding [GO:0031625]                                                                                                                                                                                                                                                                                                                                                                                                                                                                                                                                                                                                                             |
| P78563 | adenosine deaminase activity [GO:0004000]; double-stranded RNA adenosine deaminase activity [GO:0003726]; double-stranded RNA binding [GO:0003725]; metal ion binding [GO:0046872]; mRNA binding [GO:0003729]; poly(A) RNA binding [GO:0044822]; RNA binding [GO:0003723]                                                                                                                                                                                                                                                                                                                                                                                                                                                                                                                                                                                                                                                                                                                                                                                   |
| Q9NS39 | adenosine deaminase activity [GO:0004000]; double-stranded RNA binding [GO:0003725]; metal ion binding [GO:0046872]; poly(A) RNA binding [GO:0044822]; single-stranded RNA binding [GO:0003727]                                                                                                                                                                                                                                                                                                                                                                                                                                                                                                                                                                                                                                                                                                                                                                                                                                                             |
| Q8NCV1 | adenosine deaminase activity [GO:0004000]; RNA binding [GO:0003723]                                                                                                                                                                                                                                                                                                                                                                                                                                                                                                                                                                                                                                                                                                                                                                                                                                                                                                                                                                                         |
| Q96M93 | adenosine deaminase activity [GO:0004000]; RNA binding [GO:0003723]                                                                                                                                                                                                                                                                                                                                                                                                                                                                                                                                                                                                                                                                                                                                                                                                                                                                                                                                                                                         |
| P54819 | adenylate kinase activity [GO:0004017]; ATP binding [GO:0005524]                                                                                                                                                                                                                                                                                                                                                                                                                                                                                                                                                                                                                                                                                                                                                                                                                                                                                                                                                                                            |
| P27144 | adenylate kinase activity [GO:0004017]; ATP binding [GO:0005524]; GTP binding [GO:0005525]; nucleoside diphosphate kinase activity [GO:0004550]; nucleoside triphosphate adenylate kinase activity [GO:0046899]                                                                                                                                                                                                                                                                                                                                                                                                                                                                                                                                                                                                                                                                                                                                                                                                                                             |
| O14727 | ADP binding [GO:0043531]; ATP binding [GO:0005524]; cysteine-type endopeptidase activator activity involved in apoptotic process [GO:0008656]; nucleotide binding [GO:0000166]                                                                                                                                                                                                                                                                                                                                                                                                                                                                                                                                                                                                                                                                                                                                                                                                                                                                              |
| O75460 | ADP binding [GO:0043531]; ATP binding [GO:0005524]; endoribonuclease activity [GO:0004521]; enzyme binding [GO:0019899]; Hsp70 protein binding [GO:0030544]; Hsp90 protein binding [GO:0051879]; identical protein binding [GO:0042802]; magnesium ion binding [GO:0000287]; protein homodimerization activity [GO:0042803]; protein serine/threonine kinase activity [GO:0004674]                                                                                                                                                                                                                                                                                                                                                                                                                                                                                                                                                                                                                                                                          |
| Q8NI60 | ADP binding [GO:0043531]; ATP binding [GO:0005524]; kinase activity [GO:0016301]                                                                                                                                                                                                                                                                                                                                                                                                                                                                                                                                                                                                                                                                                                                                                                                                                                                                                                                                                                            |
| Q03518 | ADP binding [GO:0043531]; ATPase activity, coupled to transmembrane movement of substances [GO:0042626]; ATP binding [GO:0005524]; MHC class Ib protein binding [GO:0023029]; peptide antigen binding [GO:0042605]; peptide transporter activity [GO:0015197]; peptide-transporting ATPase activity [GO:0015440]; protein homodimerization activity [GO:0042803]; TAP1 binding [GO:0046978]; TAP2 binding [GO:0046979]                                                                                                                                                                                                                                                                                                                                                                                                                                                                                                                                                                                                                                      |
| P49588 | alanine-tRNA ligase activity [GO:0004813]; aminoacyl-tRNA editing activity [GO:0002161]; ATP binding [GO:0005524]; tRNA binding [GO:0000049]; zinc ion binding [GO:0008270]                                                                                                                                                                                                                                                                                                                                                                                                                                                                                                                                                                                                                                                                                                                                                                                                                                                                                 |
| Q5JTZ9 | alanine-tRNA ligase activity [GO:0004813]; ATP binding [GO:0005524]; tRNA binding [GO:0000049]; zinc ion binding [GO:0008270]                                                                                                                                                                                                                                                                                                                                                                                                                                                                                                                                                                                                                                                                                                                                                                                                                                                                                                                               |
| O75891 | aldehyde dehydrogenase (NAD) activity [GO:0004029]; catalytic activity [GO:0003824]; formyltetrahydrofolate dehydrogenase activity [GO:0016155]; hydroxymethyl-, formyl- and related                                                                                                                                                                                                                                                                                                                                                                                                                                                                                                                                                                                                                                                                                                                                                                                                                                                                        |

|        |                                                                                                                                                                                                                                                                                                                                                                                                                                                                                                                                                                |
|--------|----------------------------------------------------------------------------------------------------------------------------------------------------------------------------------------------------------------------------------------------------------------------------------------------------------------------------------------------------------------------------------------------------------------------------------------------------------------------------------------------------------------------------------------------------------------|
|        | transferase activity [GO:0016742]; methyltransferase activity [GO:0008168]                                                                                                                                                                                                                                                                                                                                                                                                                                                                                     |
| Q3SY69 | aldehyde dehydrogenase (NAD) activity [GO:0004029]; formyltetrahydrofolate dehydrogenase activity [GO:0016155]; hydroxymethyl-, formyl- and related transferase activity [GO:0016742]; methyltransferase activity [GO:0008168]                                                                                                                                                                                                                                                                                                                                 |
| P25098 | alpha-2A adrenergic receptor binding [GO:0031694]; ATP binding [GO:0005524]; beta-adrenergic receptor kinase activity [GO:0047696]; Edg-2 lysophosphatidic acid receptor binding [GO:0031755]; G-protein coupled receptor kinase activity [GO:0004703]; protein kinase activity [GO:0004672]                                                                                                                                                                                                                                                                   |
| P10323 | amidase activity [GO:0004040]; copper ion binding [GO:0005507]; DNA binding [GO:0003677]; drug binding [GO:0008144]; fucose binding [GO:0042806]; mannose binding [GO:0005537]; serine-type endopeptidase activity [GO:0004252]; zinc ion binding [GO:0008270]                                                                                                                                                                                                                                                                                                 |
| Q15046 | amino acid binding [GO:0016597]; ATP binding [GO:0005524]; lysine-tRNA ligase activity [GO:0004824]; metal ion binding [GO:0046872]; tRNA binding [GO:0000049]                                                                                                                                                                                                                                                                                                                                                                                                 |
| A6NEY8 | aminoacyl-tRNA editing activity [GO:0002161]                                                                                                                                                                                                                                                                                                                                                                                                                                                                                                                   |
| P41252 | aminoacyl-tRNA editing activity [GO:0002161]; ATP binding [GO:0005524]; GTPase binding [GO:0051020]; isoleucine-tRNA ligase activity [GO:0004822]                                                                                                                                                                                                                                                                                                                                                                                                              |
| Q9NSE4 | aminoacyl-tRNA editing activity [GO:0002161]; ATP binding [GO:0005524]; isoleucine-tRNA ligase activity [GO:0004822]                                                                                                                                                                                                                                                                                                                                                                                                                                           |
| Q15031 | aminoacyl-tRNA editing activity [GO:0002161]; ATP binding [GO:0005524]; leucine-tRNA ligase activity [GO:0004823]                                                                                                                                                                                                                                                                                                                                                                                                                                              |
| Q9P2J5 | aminoacyl-tRNA editing activity [GO:0002161]; ATP binding [GO:0005524]; leucine-tRNA ligase activity [GO:0004823]                                                                                                                                                                                                                                                                                                                                                                                                                                              |
| P26640 | aminoacyl-tRNA editing activity [GO:0002161]; ATP binding [GO:0005524]; valine-tRNA ligase activity [GO:0004832]                                                                                                                                                                                                                                                                                                                                                                                                                                               |
| Q5ST30 | aminoacyl-tRNA editing activity [GO:0002161]; ATP binding [GO:0005524]; valine-tRNA ligase activity [GO:0004832]                                                                                                                                                                                                                                                                                                                                                                                                                                               |
| Q96FN9 | aminoacyl-tRNA editing activity [GO:0002161]; D-tyrosyl-tRNA(Tyr) deacylase activity [GO:0051500]                                                                                                                                                                                                                                                                                                                                                                                                                                                              |
| Q8TEA8 | aminoacyl-tRNA editing activity [GO:0002161]; DNA binding [GO:0003677]; D-tyrosyl-tRNA(Tyr) deacylase activity [GO:0051500]; metal ion binding [GO:0046872]                                                                                                                                                                                                                                                                                                                                                                                                    |
| Q6GMV3 | aminoacyl-tRNA hydrolase activity [GO:0004045]                                                                                                                                                                                                                                                                                                                                                                                                                                                                                                                 |
| Q9Y3E5 | aminoacyl-tRNA hydrolase activity [GO:0004045]                                                                                                                                                                                                                                                                                                                                                                                                                                                                                                                 |
| Q86Y79 | aminoacyl-tRNA hydrolase activity [GO:0004045]; poly(A) RNA binding [GO:0044822]                                                                                                                                                                                                                                                                                                                                                                                                                                                                               |
| Q14197 | aminoacyl-tRNA hydrolase activity [GO:0004045]; ribosome binding [GO:0043022]; translation release factor activity, codon nonspecific [GO:0016150]                                                                                                                                                                                                                                                                                                                                                                                                             |
| Q9H3J6 | aminoacyl-tRNA hydrolase activity [GO:0004045]; ribosome binding [GO:0043022]; translation release factor activity, codon nonspecific [GO:0016150]                                                                                                                                                                                                                                                                                                                                                                                                             |
| P14868 | aminoacylase activity [GO:0004046]; aspartate-tRNA ligase activity [GO:0004815]; ATP binding [GO:0005524]; poly(A) RNA binding [GO:0044822]                                                                                                                                                                                                                                                                                                                                                                                                                    |
| P53582 | aminopeptidase activity [GO:0004177]; metal ion binding [GO:0046872]; metalloaminopeptidase activity [GO:0070006]; metalloexopeptidase activity [GO:0008235]                                                                                                                                                                                                                                                                                                                                                                                                   |
| P53350 | anaphase-promoting complex binding [GO:0010997]; ATP binding [GO:0005524]; kinase activity [GO:0016301]; microtubule binding [GO:0008017]; protein kinase activity [GO:0004672]; protein kinase binding [GO:0019901]; protein serine/threonine kinase activity [GO:0004674]                                                                                                                                                                                                                                                                                    |
| P17844 | androgen receptor binding [GO:0050681]; ATP binding [GO:0005524]; ATP-dependent RNA helicase activity [GO:0004004]; estrogen receptor binding [GO:0030331]; poly(A) RNA binding [GO:0044822]; pre-mRNA binding [GO:0036002]; RNA helicase activity [GO:0003724]; transcription coactivator activity [GO:0003713]                                                                                                                                                                                                                                               |
| P05771 | androgen receptor binding [GO:0050681]; ATP binding [GO:0005524]; calcium channel regulator activity [GO:0005246]; chromatin binding [GO:0003682]; histone binding [GO:0042393]; histone kinase activity (H3-T6 specific) [GO:0035403]; ligand-dependent nuclear receptor transcription coactivator activity [GO:0030374]; protein kinase C activity [GO:0004697]; protein kinase C binding [GO:0005080]; protein serine/threonine kinase activity [GO:0004674]; zinc ion binding [GO:0008270]                                                                 |
| Q16512 | androgen receptor binding [GO:0050681]; ATP binding [GO:0005524]; chromatin binding [GO:0003682]; GTP-Rho binding [GO:0017049]; histone binding [GO:0042393]; histone deacetylase binding [GO:0042826]; histone kinase activity (H3-T11 specific) [GO:0035402]; ligand-dependent nuclear receptor transcription coactivator activity [GO:0030374]; protein kinase activity [GO:0004672]; protein kinase C activity [GO:0004697]; protein kinase C binding [GO:0005080]; protein serine/threonine kinase activity [GO:0004674]; Rac GTPase binding [GO:0048365] |

|        |                                                                                                                                                                                                                                                                                                                                                                                                                                                                                                                                                                                                   |
|--------|---------------------------------------------------------------------------------------------------------------------------------------------------------------------------------------------------------------------------------------------------------------------------------------------------------------------------------------------------------------------------------------------------------------------------------------------------------------------------------------------------------------------------------------------------------------------------------------------------|
| P50613 | androgen receptor binding [GO:0050681]; ATP binding [GO:0005524]; cyclin-dependent protein serine/threonine kinase activity [GO:0004693]; DNA-dependent ATPase activity [GO:0008094]; protein C-terminus binding [GO:0008022]; protein kinase activity [GO:0004672]; RNA polymerase II carboxy-terminal domain kinase activity [GO:0008353]; transcription coactivator activity [GO:0003713]                                                                                                                                                                                                      |
| P62826 | androgen receptor binding [GO:0050681]; chromatin binding [GO:0003682]; GDP binding [GO:0019003]; GTPase activity [GO:0003924]; GTP binding [GO:0005525]; poly(A) RNA binding [GO:0044822]; transcription coactivator activity [GO:0003713]                                                                                                                                                                                                                                                                                                                                                       |
| Q9Y4C1 | androgen receptor binding [GO:0050681]; core promoter binding [GO:0001047]; dioxygenase activity [GO:0051213]; iron ion binding [GO:0005506]; transcription factor activity, sequence-specific DNA binding [GO:0003700]; transcription regulatory region sequence-specific DNA binding [GO:0000976]                                                                                                                                                                                                                                                                                               |
| Q9H3R0 | androgen receptor binding [GO:0050681]; dioxygenase activity [GO:0051213]; enzyme binding [GO:0019899]; histone demethylase activity [GO:0032452]; histone demethylase activity (H3-K9 specific) [GO:0032454]; zinc ion binding [GO:0008270]                                                                                                                                                                                                                                                                                                                                                      |
| P78317 | androgen receptor binding [GO:0050681]; DNA binding [GO:0003677]; identical protein binding [GO:0042802]; ligase activity [GO:0016874]; nucleosome binding [GO:0031491]; SUMO polymer binding [GO:0032184]; transcription coactivator activity [GO:0003713]; transcription factor activity, sequence-specific DNA binding [GO:0003700]; ubiquitin-protein transferase activity [GO:0004842]; zinc ion binding [GO:0008270]                                                                                                                                                                        |
| Q9Y252 | androgen receptor binding [GO:0050681]; DNA binding [GO:0003677]; ligase activity [GO:0016874]; ubiquitin protein ligase activity [GO:0061630]; ubiquitin-protein transferase activity [GO:0004842]; zinc ion binding [GO:0008270]                                                                                                                                                                                                                                                                                                                                                                |
| Q92993 | androgen receptor binding [GO:0050681]; histone acetyltransferase activity [GO:0004402]; metal ion binding [GO:0046872]; repressing transcription factor binding [GO:0070491]; transcription coactivator activity [GO:0003713]                                                                                                                                                                                                                                                                                                                                                                    |
| O94906 | androgen receptor binding [GO:0050681]; poly(A) RNA binding [GO:0044822]; ribonucleoprotein complex binding [GO:0043021]; RNA binding [GO:0003723]; transcription coactivator activity [GO:0003713]                                                                                                                                                                                                                                                                                                                                                                                               |
| O95477 | anion transmembrane transporter activity [GO:0008509]; apolipoprotein A-I binding [GO:0034186]; apolipoprotein A-I receptor activity [GO:0034188]; apolipoprotein binding [GO:0034185]; ATPase activity, coupled to transmembrane movement of substances [GO:0042626]; ATPase binding [GO:0051117]; ATP binding [GO:0005524]; cholesterol binding [GO:0015485]; cholesterol transporter activity [GO:0017127]; phospholipid binding [GO:0005543]; phospholipid transporter activity [GO:0005548]; receptor binding [GO:0005102]; small GTPase binding [GO:0031267]; syntaxin binding [GO:0019905] |
| Q5VST9 | ankyrin binding [GO:0030506]; ATP binding [GO:0005524]; metal ion binding [GO:0046872]; protein serine/threonine kinase activity [GO:0004674]; Rho guanyl-nucleotide exchange factor activity [GO:0005089]; structural constituent of muscle [GO:0008307]; titin binding [GO:0031432]                                                                                                                                                                                                                                                                                                             |
| Q15149 | ankyrin binding [GO:0030506]; poly(A) RNA binding [GO:0044822]; structural constituent of muscle [GO:0008307]                                                                                                                                                                                                                                                                                                                                                                                                                                                                                     |
| O94761 | annealing helicase activity [GO:0036310]; ATP binding [GO:0005524]; ATP-dependent 3'-5' DNA helicase activity [GO:0043140]; bubble DNA binding [GO:0000405]; zinc ion binding [GO:0008270]                                                                                                                                                                                                                                                                                                                                                                                                        |
| P46063 | annealing helicase activity [GO:0036310]; ATP binding [GO:0005524]; ATP-dependent DNA helicase activity [GO:0004003]; DNA binding [GO:0003677]; DNA helicase activity [GO:0003678]                                                                                                                                                                                                                                                                                                                                                                                                                |
| P54132 | annealing helicase activity [GO:0036310]; ATPase activity [GO:0016887]; ATP binding [GO:0005524]; ATP-dependent 3'-5' DNA helicase activity [GO:0043140]; ATP-dependent DNA helicase activity [GO:0004003]; ATP-dependent helicase activity [GO:0008026]; bubble DNA binding [GO:0000405]; four-way junction helicase activity [GO:0009378]; G-quadruplex DNA binding [GO:0051880]; helicase activity [GO:0004386]; p53 binding [GO:0002039]; single-stranded DNA binding [GO:0003697]                                                                                                            |
| A0M8Q6 | antigen binding [GO:0003823]                                                                                                                                                                                                                                                                                                                                                                                                                                                                                                                                                                      |
| P01593 | antigen binding [GO:0003823]                                                                                                                                                                                                                                                                                                                                                                                                                                                                                                                                                                      |
| P01594 | antigen binding [GO:0003823]                                                                                                                                                                                                                                                                                                                                                                                                                                                                                                                                                                      |
| P01595 | antigen binding [GO:0003823]                                                                                                                                                                                                                                                                                                                                                                                                                                                                                                                                                                      |
| P01596 | antigen binding [GO:0003823]                                                                                                                                                                                                                                                                                                                                                                                                                                                                                                                                                                      |
| P01597 | antigen binding [GO:0003823]                                                                                                                                                                                                                                                                                                                                                                                                                                                                                                                                                                      |
| P01598 | antigen binding [GO:0003823]                                                                                                                                                                                                                                                                                                                                                                                                                                                                                                                                                                      |
| P01599 | antigen binding [GO:0003823]                                                                                                                                                                                                                                                                                                                                                                                                                                                                                                                                                                      |

|        |                              |
|--------|------------------------------|
| P01600 | antigen binding [GO:0003823] |
| P01601 | antigen binding [GO:0003823] |
| P01602 | antigen binding [GO:0003823] |
| P01603 | antigen binding [GO:0003823] |
| P01604 | antigen binding [GO:0003823] |
| P01605 | antigen binding [GO:0003823] |
| P01606 | antigen binding [GO:0003823] |
| P01607 | antigen binding [GO:0003823] |
| P01608 | antigen binding [GO:0003823] |
| P01609 | antigen binding [GO:0003823] |
| P01610 | antigen binding [GO:0003823] |
| P01611 | antigen binding [GO:0003823] |
| P01612 | antigen binding [GO:0003823] |
| P01613 | antigen binding [GO:0003823] |
| P01614 | antigen binding [GO:0003823] |
| P01615 | antigen binding [GO:0003823] |
| P01616 | antigen binding [GO:0003823] |
| P01617 | antigen binding [GO:0003823] |
| P01619 | antigen binding [GO:0003823] |
| P01620 | antigen binding [GO:0003823] |
| P01621 | antigen binding [GO:0003823] |
| P01622 | antigen binding [GO:0003823] |
| P01623 | antigen binding [GO:0003823] |
| P01624 | antigen binding [GO:0003823] |
| P01625 | antigen binding [GO:0003823] |
| P01699 | antigen binding [GO:0003823] |
| P01700 | antigen binding [GO:0003823] |
| P01701 | antigen binding [GO:0003823] |
| P01702 | antigen binding [GO:0003823] |
| P01703 | antigen binding [GO:0003823] |
| P01704 | antigen binding [GO:0003823] |
| P01705 | antigen binding [GO:0003823] |
| P01706 | antigen binding [GO:0003823] |
| P01707 | antigen binding [GO:0003823] |
| P01708 | antigen binding [GO:0003823] |
| P01709 | antigen binding [GO:0003823] |
| P01710 | antigen binding [GO:0003823] |
| P01711 | antigen binding [GO:0003823] |
| P01712 | antigen binding [GO:0003823] |
| P01713 | antigen binding [GO:0003823] |
| P01714 | antigen binding [GO:0003823] |
| P01715 | antigen binding [GO:0003823] |
| P01716 | antigen binding [GO:0003823] |
| P01717 | antigen binding [GO:0003823] |



|        |                              |
|--------|------------------------------|
| P01718 | antigen binding [GO:0003823] |
| P01719 | antigen binding [GO:0003823] |
| P01720 | antigen binding [GO:0003823] |
| P01721 | antigen binding [GO:0003823] |
| P01722 | antigen binding [GO:0003823] |
| P01742 | antigen binding [GO:0003823] |
| P01743 | antigen binding [GO:0003823] |
| P01744 | antigen binding [GO:0003823] |
| P01760 | antigen binding [GO:0003823] |
| P01761 | antigen binding [GO:0003823] |
| P01762 | antigen binding [GO:0003823] |
| P01763 | antigen binding [GO:0003823] |
| P01764 | antigen binding [GO:0003823] |
| P01765 | antigen binding [GO:0003823] |
| P01766 | antigen binding [GO:0003823] |
| P01767 | antigen binding [GO:0003823] |
| P01768 | antigen binding [GO:0003823] |
| P01769 | antigen binding [GO:0003823] |
| P01770 | antigen binding [GO:0003823] |
| P01771 | antigen binding [GO:0003823] |
| P01772 | antigen binding [GO:0003823] |
| P01773 | antigen binding [GO:0003823] |
| P01774 | antigen binding [GO:0003823] |
| P01775 | antigen binding [GO:0003823] |
| P01776 | antigen binding [GO:0003823] |
| P01777 | antigen binding [GO:0003823] |
| P01778 | antigen binding [GO:0003823] |
| P01779 | antigen binding [GO:0003823] |
| P01780 | antigen binding [GO:0003823] |
| P01781 | antigen binding [GO:0003823] |
| P01782 | antigen binding [GO:0003823] |
| P01814 | antigen binding [GO:0003823] |
| P01815 | antigen binding [GO:0003823] |
| P01816 | antigen binding [GO:0003823] |
| P01817 | antigen binding [GO:0003823] |
| P01818 | antigen binding [GO:0003823] |
| P01824 | antigen binding [GO:0003823] |
| P01825 | antigen binding [GO:0003823] |
| P01834 | antigen binding [GO:0003823] |
| P01854 | antigen binding [GO:0003823] |
| P01857 | antigen binding [GO:0003823] |
| P01859 | antigen binding [GO:0003823] |
| P01860 | antigen binding [GO:0003823] |
| P01861 | antigen binding [GO:0003823] |

|        |                              |
|--------|------------------------------|
| P01871 | antigen binding [GO:0003823] |
| P01876 | antigen binding [GO:0003823] |
| P01877 | antigen binding [GO:0003823] |
| P01880 | antigen binding [GO:0003823] |
| P04206 | antigen binding [GO:0003823] |
| P04207 | antigen binding [GO:0003823] |
| P04208 | antigen binding [GO:0003823] |
| P04209 | antigen binding [GO:0003823] |
| P04211 | antigen binding [GO:0003823] |
| P04220 | antigen binding [GO:0003823] |
| P04430 | antigen binding [GO:0003823] |
| P04431 | antigen binding [GO:0003823] |
| P04432 | antigen binding [GO:0003823] |
| P04433 | antigen binding [GO:0003823] |
| P04434 | antigen binding [GO:0003823] |
| P04438 | antigen binding [GO:0003823] |
| P06309 | antigen binding [GO:0003823] |
| P06310 | antigen binding [GO:0003823] |
| P06311 | antigen binding [GO:0003823] |
| P06312 | antigen binding [GO:0003823] |
| P06313 | antigen binding [GO:0003823] |
| P06314 | antigen binding [GO:0003823] |
| P06315 | antigen binding [GO:0003823] |
| P06316 | antigen binding [GO:0003823] |
| P06317 | antigen binding [GO:0003823] |
| P06318 | antigen binding [GO:0003823] |
| P06319 | antigen binding [GO:0003823] |
| P06326 | antigen binding [GO:0003823] |
| P06331 | antigen binding [GO:0003823] |
| P06887 | antigen binding [GO:0003823] |
| P06888 | antigen binding [GO:0003823] |
| P06889 | antigen binding [GO:0003823] |
| P0CF74 | antigen binding [GO:0003823] |
| P0CG04 | antigen binding [GO:0003823] |
| P0CG05 | antigen binding [GO:0003823] |
| P0CG06 | antigen binding [GO:0003823] |
| P18135 | antigen binding [GO:0003823] |
| P18136 | antigen binding [GO:0003823] |
| P23083 | antigen binding [GO:0003823] |
| P80362 | antigen binding [GO:0003823] |
| P80419 | antigen binding [GO:0003823] |
| P80421 | antigen binding [GO:0003823] |
| P80422 | antigen binding [GO:0003823] |
| P80748 | antigen binding [GO:0003823] |

|        |                                                                                                                                                                                                                                                                                                                                                                                   |
|--------|-----------------------------------------------------------------------------------------------------------------------------------------------------------------------------------------------------------------------------------------------------------------------------------------------------------------------------------------------------------------------------------|
| P83593 | antigen binding [GO:0003823]                                                                                                                                                                                                                                                                                                                                                      |
| Q7LBC6 | antioxidant activity [GO:0016209]; dioxygenase activity [GO:0051213]; metal ion binding [GO:0046872]                                                                                                                                                                                                                                                                              |
| P00738 | antioxidant activity [GO:0016209]; hemoglobin binding [GO:0030492]                                                                                                                                                                                                                                                                                                                |
| Q8IZY2 | apolipoprotein A-I receptor activity [GO:0034188]; ATPase activity, coupled to transmembrane movement of substances [GO:0042626]; ATP binding [GO:0005524]; cholesterol transporter activity [GO:0017127]; phospholipid transporter activity [GO:0005548]; transporter activity [GO:0005215]                                                                                      |
| Q86UK0 | apolipoprotein A-I receptor binding [GO:0034191]; ATPase activity, coupled to transmembrane movement of substances [GO:0042626]; ATP binding [GO:0005524]; cholesterol transporter activity [GO:0017127]; lipid transporter activity [GO:0005319]; lipid-transporting ATPase activity [GO:0034040]; phospholipid transporter activity [GO:0005548]; receptor binding [GO:0005102] |
| P08519 | apolipoprotein binding [GO:0034185]; endopeptidase inhibitor activity [GO:0004866]; fibronectin binding [GO:0001968]; heparin binding [GO:0008201]; serine-type endopeptidase activity [GO:0004252]                                                                                                                                                                               |
| P00747 | apolipoprotein binding [GO:0034185]; protein domain specific binding [GO:0019904]; receptor binding [GO:0005102]; serine-type endopeptidase activity [GO:0004252]; serine-type peptidase activity [GO:0008236]                                                                                                                                                                    |
| P54136 | arginine binding [GO:0034618]; arginine-tRNA ligase activity [GO:0004814]; ATP binding [GO:0005524]; tRNA binding [GO:0000049]                                                                                                                                                                                                                                                    |
| Q5D0E6 | arginine-tRNA ligase activity [GO:0004814]; ATP binding [GO:0005524]                                                                                                                                                                                                                                                                                                              |
| Q5T160 | arginine-tRNA ligase activity [GO:0004814]; ATP binding [GO:0005524]; poly(A) RNA binding [GO:0044822]                                                                                                                                                                                                                                                                            |
| O95260 | arginyltransferase activity [GO:0004057]                                                                                                                                                                                                                                                                                                                                          |
| O43815 | armadillo repeat domain binding [GO:0070016]; calmodulin binding [GO:0005516]; estrogen receptor binding [GO:0030331]; protein complex binding [GO:0032403]; protein phosphatase 2A binding [GO:0051721]                                                                                                                                                                          |
| Q9NRL3 | armadillo repeat domain binding [GO:0070016]; calmodulin binding [GO:0005516]; protein complex binding [GO:0032403]; protein phosphatase 2A binding [GO:0051721]                                                                                                                                                                                                                  |
| Q13033 | armadillo repeat domain binding [GO:0070016]; calmodulin binding [GO:0005516]; protein complex binding [GO:0032403]; protein phosphatase 2A binding [GO:0051721]; transcription factor activity, sequence-specific DNA binding [GO:0003700]                                                                                                                                       |
| O43776 | asparagine-tRNA ligase activity [GO:0004816]; ATP binding [GO:0005524]; nucleic acid binding [GO:0003676]                                                                                                                                                                                                                                                                         |
| Q96I59 | asparagine-tRNA ligase activity [GO:0004816]; ATP binding [GO:0005524]; nucleic acid binding [GO:0003676]                                                                                                                                                                                                                                                                         |
| Q6PI48 | aspartate-tRNA(Asn) ligase activity [GO:0050560]; aspartate-tRNA ligase activity [GO:0004815]; ATP binding [GO:0005524]; protein homodimerization activity [GO:0042803]; tRNA binding [GO:0000049]                                                                                                                                                                                |
| P63128 | aspartic-type endopeptidase activity [GO:0004190]; DNA-directed DNA polymerase activity [GO:0003887]; RNA binding [GO:0003723]; RNA-directed DNA polymerase activity [GO:0003964]; RNA-DNA hybrid ribonuclease activity [GO:0004523]; structural molecule activity [GO:0005198]; zinc ion binding [GO:0008270]                                                                    |
| P10265 | aspartic-type endopeptidase activity [GO:0004190]; nucleic acid binding [GO:0003676]                                                                                                                                                                                                                                                                                              |
| P63119 | aspartic-type endopeptidase activity [GO:0004190]; nucleic acid binding [GO:0003676]                                                                                                                                                                                                                                                                                              |
| P63120 | aspartic-type endopeptidase activity [GO:0004190]; nucleic acid binding [GO:0003676]                                                                                                                                                                                                                                                                                              |
| P63121 | aspartic-type endopeptidase activity [GO:0004190]; nucleic acid binding [GO:0003676]                                                                                                                                                                                                                                                                                              |
| P63122 | aspartic-type endopeptidase activity [GO:0004190]; nucleic acid binding [GO:0003676]                                                                                                                                                                                                                                                                                              |
| P63123 | aspartic-type endopeptidase activity [GO:0004190]; nucleic acid binding [GO:0003676]                                                                                                                                                                                                                                                                                              |
| P63124 | aspartic-type endopeptidase activity [GO:0004190]; nucleic acid binding [GO:0003676]                                                                                                                                                                                                                                                                                              |
| P63125 | aspartic-type endopeptidase activity [GO:0004190]; nucleic acid binding [GO:0003676]                                                                                                                                                                                                                                                                                              |
| P63127 | aspartic-type endopeptidase activity [GO:0004190]; nucleic acid binding [GO:0003676]                                                                                                                                                                                                                                                                                              |
| P63129 | aspartic-type endopeptidase activity [GO:0004190]; nucleic acid binding [GO:0003676]                                                                                                                                                                                                                                                                                              |
| P63131 | aspartic-type endopeptidase activity [GO:0004190]; nucleic acid binding [GO:0003676]                                                                                                                                                                                                                                                                                              |
| Q9Y6I0 | aspartic-type endopeptidase activity [GO:0004190]; nucleic acid binding [GO:0003676]                                                                                                                                                                                                                                                                                              |
| Q149M9 | ATP binding [GO:0005524]                                                                                                                                                                                                                                                                                                                                                          |
| Q96EK9 | ATP binding [GO:0005524]                                                                                                                                                                                                                                                                                                                                                          |

|        |                                                                                                                                                                                                                                                                                                                                                                                                                                                                                           |
|--------|-------------------------------------------------------------------------------------------------------------------------------------------------------------------------------------------------------------------------------------------------------------------------------------------------------------------------------------------------------------------------------------------------------------------------------------------------------------------------------------------|
| P13569 | ATP binding [GO:0005524]; ATP-binding and phosphorylation-dependent chloride channel activity [GO:0005224]; bicarbonate transmembrane transporter activity [GO:0015106]; channel-conductance-controlling ATPase activity [GO:0005260]; chloride channel activity [GO:0005254]; chloride channel inhibitor activity [GO:0019869]; chloride transmembrane transporter activity [GO:0015108]; enzyme binding [GO:0019899]; PDZ domain binding [GO:0030165]                                   |
| Q8N3C0 | ATP binding [GO:0005524]; ATP-dependent 3'-5' DNA helicase activity [GO:0043140]; poly(A) RNA binding [GO:0044822]                                                                                                                                                                                                                                                                                                                                                                        |
| Q13283 | ATP binding [GO:0005524]; ATP-dependent DNA helicase activity [GO:0004003]; ATP-dependent RNA helicase activity [GO:0004004]; DNA binding [GO:0003677]; endonuclease activity [GO:0004519]; mRNA binding [GO:0003729]; poly(A) RNA binding [GO:0044822]                                                                                                                                                                                                                                   |
| Q08211 | ATP binding [GO:0005524]; ATP-dependent DNA helicase activity [GO:0004003]; ATP-dependent RNA helicase activity [GO:0004004]; DNA binding [GO:0003677]; poly(A) RNA binding [GO:0044822]; RNA helicase activity [GO:0003724]; RNA polymerase II transcription factor binding [GO:0001085]                                                                                                                                                                                                 |
| Q92499 | ATP binding [GO:0005524]; ATP-dependent helicase activity [GO:0008026]; ATP-dependent RNA helicase activity [GO:0004004]; chromatin binding [GO:0003682]; DNA/RNA helicase activity [GO:0003677]; DNA binding [GO:0003677]; double-stranded RNA binding [GO:0003725]; exonuclease activity [GO:0004527]; nuclease activity [GO:0004518]; poly(A) binding [GO:0008143]; poly(A) RNA binding [GO:0044822]; RNA helicase activity [GO:0003724]; transcription cofactor activity [GO:0003712] |
| O75643 | ATP binding [GO:0005524]; ATP-dependent helicase activity [GO:0008026]; ATP-dependent RNA helicase activity [GO:0004004]; identical protein binding [GO:0042802]; poly(A) RNA binding [GO:0044822]                                                                                                                                                                                                                                                                                        |
| O94762 | ATP binding [GO:0005524]; ATP-dependent helicase activity [GO:0008026]; DNA helicase activity [GO:0003678]; nucleic acid binding [GO:0003676]; RNA polymerase II core binding [GO:0000993]                                                                                                                                                                                                                                                                                                |
| Q92989 | ATP binding [GO:0005524]; ATP-dependent polydeoxyribonucleotide 5'-hydroxyl-kinase activity [GO:0046404]; ATP-dependent polyribonucleotide 5'-hydroxyl-kinase activity [GO:0051736]; polydeoxyribonucleotide kinase activity [GO:0051733]                                                                                                                                                                                                                                                 |
| Q13838 | ATP binding [GO:0005524]; ATP-dependent protein binding [GO:0043008]; ATP-dependent RNA helicase activity [GO:0004004]; poly(A) RNA binding [GO:0044822]; RNA-dependent ATPase activity [GO:0008186]; U4 snRNA binding [GO:0030621]; U6 snRNA binding [GO:0017070]                                                                                                                                                                                                                        |
| Q92900 | ATP binding [GO:0005524]; ATP-dependent RNA helicase activity [GO:0004004]; chromatin binding [GO:0003682]; DNA binding [GO:0003677]; helicase activity [GO:0004386]; poly(A) RNA binding [GO:0044822]; RNA binding [GO:0003723]; zinc ion binding [GO:0008270]                                                                                                                                                                                                                           |
| Q7L2E3 | ATP binding [GO:0005524]; ATP-dependent RNA helicase activity [GO:0004004]; chromatin binding [GO:0003682]; double-stranded RNA binding [GO:0003725]; poly(A) RNA binding [GO:0044822]                                                                                                                                                                                                                                                                                                    |
| Q9H2U1 | ATP binding [GO:0005524]; ATP-dependent RNA helicase activity [GO:0004004]; core promoter binding [GO:0001047]; DNA-dependent ATPase activity [GO:0008094]; double-stranded RNA binding [GO:0003725]; G-quadruplex DNA binding [GO:0051880]; G-quadruplex RNA binding [GO:0002151]; histone deacetylase binding [GO:0042826]; poly(A) RNA binding [GO:0044822]; transcription regulatory region DNA binding [GO:0044212]                                                                  |
| Q9UJV9 | ATP binding [GO:0005524]; ATP-dependent RNA helicase activity [GO:0004004]; DNA binding [GO:0003677]; poly(A) RNA binding [GO:0044822]; zinc ion binding [GO:0008270]                                                                                                                                                                                                                                                                                                                     |
| Q9UHI6 | ATP binding [GO:0005524]; ATP-dependent RNA helicase activity [GO:0004004]; DNA binding [GO:0003677]; repressing transcription factor binding [GO:0070491]                                                                                                                                                                                                                                                                                                                                |
| O15523 | ATP binding [GO:0005524]; ATP-dependent RNA helicase activity [GO:0004004]; DNA binding [GO:0003677]; RNA binding [GO:0003723]                                                                                                                                                                                                                                                                                                                                                            |
| P60842 | ATP binding [GO:0005524]; ATP-dependent RNA helicase activity [GO:0004004]; double-stranded RNA binding [GO:0003725]; helicase activity [GO:0004386]; mRNA binding [GO:0003729]; poly(A) RNA binding [GO:0044822]; RNA cap binding [GO:0000339]; translation factor activity, RNA binding [GO:0008135]; translation initiation factor activity [GO:0003743]                                                                                                                               |
| O43143 | ATP binding [GO:0005524]; ATP-dependent RNA helicase activity [GO:0004004]; double-stranded RNA binding [GO:0003725]; poly(A) RNA binding [GO:0044822]; RNA helicase activity [GO:0003724]                                                                                                                                                                                                                                                                                                |
| Q8TDD1 | ATP binding [GO:0005524]; ATP-dependent RNA helicase activity [GO:0004004]; estrogen receptor binding [GO:0030331]; poly(A) RNA binding [GO:0044822]; receptor binding [GO:0005102]; transcription corepressor activity [GO:0003714]                                                                                                                                                                                                                                                      |
| Q92841 | ATP binding [GO:0005524]; ATP-dependent RNA helicase activity [GO:0004004]; estrogen receptor binding [GO:0030331]; poly(A) RNA binding [GO:0044822]; RNA binding [GO:0003723]; RNA-dependent ATPase activity [GO:0008186]; RNA helicase activity [GO:0003724]; transcription                                                                                                                                                                                                             |

|        |                                                                                                                                                                                                                                |
|--------|--------------------------------------------------------------------------------------------------------------------------------------------------------------------------------------------------------------------------------|
|        | coactivator activity [GO:0003713]                                                                                                                                                                                              |
| P26196 | ATP binding [GO:0005524]; ATP-dependent RNA helicase activity [GO:0004004]; helicase activity [GO:0004386]; poly(A) RNA binding [GO:0044822]; protein domain specific binding [GO:0019904]; RNA helicase activity [GO:0003724] |
| Q9UMR2 | ATP binding [GO:0005524]; ATP-dependent RNA helicase activity [GO:0004004]; helicase activity [GO:0004386]; RNA binding [GO:0003723]                                                                                           |
| Q14562 | ATP binding [GO:0005524]; ATP-dependent RNA helicase activity [GO:0004004]; identical protein binding [GO:0042802]; poly(A) RNA binding [GO:0044822]                                                                           |
| Q9BXT6 | ATP binding [GO:0005524]; ATP-dependent RNA helicase activity [GO:0004004]; magnesium ion binding [GO:0000287]; RNA binding [GO:0003723]                                                                                       |
| Q6P158 | ATP binding [GO:0005524]; ATP-dependent RNA helicase activity [GO:0004004]; metal ion binding [GO:0046872]; poly(A) RNA binding [GO:0044822]                                                                                   |
| Q5T1V6 | ATP binding [GO:0005524]; ATP-dependent RNA helicase activity [GO:0004004]; metal ion binding [GO:0046872]; RNA binding [GO:0003723]                                                                                           |
| P38919 | ATP binding [GO:0005524]; ATP-dependent RNA helicase activity [GO:0004004]; mRNA binding [GO:0003729]; poly(A) binding [GO:0008143]; poly(A) RNA binding [GO:0044822]                                                          |
| Q9NQI0 | ATP binding [GO:0005524]; ATP-dependent RNA helicase activity [GO:0004004]; nucleic acid binding [GO:0003676]                                                                                                                  |
| O00148 | ATP binding [GO:0005524]; ATP-dependent RNA helicase activity [GO:0004004]; poly(A) RNA binding [GO:0044822]                                                                                                                   |
| Q14147 | ATP binding [GO:0005524]; ATP-dependent RNA helicase activity [GO:0004004]; poly(A) RNA binding [GO:0044822]                                                                                                                   |
| Q7L014 | ATP binding [GO:0005524]; ATP-dependent RNA helicase activity [GO:0004004]; poly(A) RNA binding [GO:0044822]                                                                                                                   |
| Q7L7V1 | ATP binding [GO:0005524]; ATP-dependent RNA helicase activity [GO:0004004]; poly(A) RNA binding [GO:0044822]                                                                                                                   |
| Q86XP3 | ATP binding [GO:0005524]; ATP-dependent RNA helicase activity [GO:0004004]; poly(A) RNA binding [GO:0044822]                                                                                                                   |
| Q8IX18 | ATP binding [GO:0005524]; ATP-dependent RNA helicase activity [GO:0004004]; poly(A) RNA binding [GO:0044822]                                                                                                                   |
| Q8IY37 | ATP binding [GO:0005524]; ATP-dependent RNA helicase activity [GO:0004004]; poly(A) RNA binding [GO:0044822]                                                                                                                   |
| Q8N8A6 | ATP binding [GO:0005524]; ATP-dependent RNA helicase activity [GO:0004004]; poly(A) RNA binding [GO:0044822]                                                                                                                   |
| Q8NDG6 | ATP binding [GO:0005524]; ATP-dependent RNA helicase activity [GO:0004004]; poly(A) RNA binding [GO:0044822]                                                                                                                   |
| Q8NHQ9 | ATP binding [GO:0005524]; ATP-dependent RNA helicase activity [GO:0004004]; poly(A) RNA binding [GO:0044822]                                                                                                                   |
| Q8TE96 | ATP binding [GO:0005524]; ATP-dependent RNA helicase activity [GO:0004004]; poly(A) RNA binding [GO:0044822]                                                                                                                   |
| Q92620 | ATP binding [GO:0005524]; ATP-dependent RNA helicase activity [GO:0004004]; poly(A) RNA binding [GO:0044822]                                                                                                                   |
| Q96GQ7 | ATP binding [GO:0005524]; ATP-dependent RNA helicase activity [GO:0004004]; poly(A) RNA binding [GO:0044822]                                                                                                                   |
| Q9BQ39 | ATP binding [GO:0005524]; ATP-dependent RNA helicase activity [GO:0004004]; poly(A) RNA binding [GO:0044822]                                                                                                                   |
| Q9BUQ8 | ATP binding [GO:0005524]; ATP-dependent RNA helicase activity [GO:0004004]; poly(A) RNA binding [GO:0044822]                                                                                                                   |
| Q9H0S4 | ATP binding [GO:0005524]; ATP-dependent RNA helicase activity [GO:0004004]; poly(A) RNA binding [GO:0044822]                                                                                                                   |
| Q9H5Z1 | ATP binding [GO:0005524]; ATP-dependent RNA helicase activity [GO:0004004]; poly(A) RNA binding [GO:0044822]                                                                                                                   |
| Q9H8H2 | ATP binding [GO:0005524]; ATP-dependent RNA helicase activity [GO:0004004]; poly(A) RNA binding [GO:0044822]                                                                                                                   |
| Q9NVP1 | ATP binding [GO:0005524]; ATP-dependent RNA helicase activity [GO:0004004]; poly(A) RNA binding [GO:0044822]                                                                                                                   |
| Q9NY93 | ATP binding [GO:0005524]; ATP-dependent RNA helicase activity [GO:0004004]; poly(A) RNA binding [GO:0044822]                                                                                                                   |

|        |                                                                                                                                                                                                                                                                                                                                                                                                                                                                |
|--------|----------------------------------------------------------------------------------------------------------------------------------------------------------------------------------------------------------------------------------------------------------------------------------------------------------------------------------------------------------------------------------------------------------------------------------------------------------------|
| Q9Y6V7 | ATP binding [GO:0005524]; ATP-dependent RNA helicase activity [GO:0004004]; poly(A) RNA binding [GO:0044822]                                                                                                                                                                                                                                                                                                                                                   |
| Q9H6R0 | ATP binding [GO:0005524]; ATP-dependent RNA helicase activity [GO:0004004]; poly(A) RNA binding [GO:0044822]; rDNA binding [GO:0000182]                                                                                                                                                                                                                                                                                                                        |
| Q7Z478 | ATP binding [GO:0005524]; ATP-dependent RNA helicase activity [GO:0004004]; poly(A) RNA binding [GO:0044822]; ribosomal small subunit binding [GO:0043024]; translation initiation factor activity [GO:0003743]                                                                                                                                                                                                                                                |
| O60231 | ATP binding [GO:0005524]; ATP-dependent RNA helicase activity [GO:0004004]; poly(A) RNA binding [GO:0044822]; RNA helicase activity [GO:0003724]                                                                                                                                                                                                                                                                                                               |
| Q13206 | ATP binding [GO:0005524]; ATP-dependent RNA helicase activity [GO:0004004]; poly(A) RNA binding [GO:0044822]; RNA helicase activity [GO:0003724]                                                                                                                                                                                                                                                                                                               |
| Q9GZR7 | ATP binding [GO:0005524]; ATP-dependent RNA helicase activity [GO:0004004]; poly(A) RNA binding [GO:0044822]; RNA helicase activity [GO:0003724]                                                                                                                                                                                                                                                                                                               |
| Q9H6S0 | ATP binding [GO:0005524]; ATP-dependent RNA helicase activity [GO:0004004]; poly(A) RNA binding [GO:0044822]; RNA-dependent ATPase activity [GO:0008186]; RNA polymerase binding [GO:0070063]                                                                                                                                                                                                                                                                  |
| Q9NUL7 | ATP binding [GO:0005524]; ATP-dependent RNA helicase activity [GO:0004004]; poly(A) RNA binding [GO:0044822]; rRNA binding [GO:0019843]                                                                                                                                                                                                                                                                                                                        |
| Q15477 | ATP binding [GO:0005524]; ATP-dependent RNA helicase activity [GO:0004004]; RNA binding [GO:0003723]                                                                                                                                                                                                                                                                                                                                                           |
| Q86TM3 | ATP binding [GO:0005524]; ATP-dependent RNA helicase activity [GO:0004004]; RNA binding [GO:0003723]                                                                                                                                                                                                                                                                                                                                                           |
| Q9NUU7 | ATP binding [GO:0005524]; ATP-dependent RNA helicase activity [GO:0004004]; RNA binding [GO:0003723]                                                                                                                                                                                                                                                                                                                                                           |
| Q9NXZ2 | ATP binding [GO:0005524]; ATP-dependent RNA helicase activity [GO:0004004]; RNA binding [GO:0003723]                                                                                                                                                                                                                                                                                                                                                           |
| Q9UHL0 | ATP binding [GO:0005524]; ATP-dependent RNA helicase activity [GO:0004004]; RNA binding [GO:0003723]                                                                                                                                                                                                                                                                                                                                                           |
| P43250 | ATP binding [GO:0005524]; beta-adrenergic receptor kinase activity [GO:0047696]; G-protein coupled receptor kinase activity [GO:0004703]                                                                                                                                                                                                                                                                                                                       |
| P34947 | ATP binding [GO:0005524]; beta-adrenergic receptor kinase activity [GO:0047696]; G-protein coupled receptor kinase activity [GO:0004703]; phospholipid binding [GO:0005543]; protein kinase C binding [GO:0005080]; protein serine/threonine kinase activity [GO:0004674]                                                                                                                                                                                      |
| P35626 | ATP binding [GO:0005524]; beta-adrenergic receptor kinase activity [GO:0047696]; G-protein coupled receptor kinase activity [GO:0004703]; protein kinase activity [GO:0004672]                                                                                                                                                                                                                                                                                 |
| P49841 | ATP binding [GO:0005524]; beta-catenin binding [GO:0008013]; kinase activity [GO:0016301]; NF-kappaB binding [GO:0051059]; p53 binding [GO:0002039]; protein kinase A catalytic subunit binding [GO:0034236]; protein kinase binding [GO:0019901]; protein serine/threonine kinase activity [GO:0004674]; RNA polymerase II transcription factor binding [GO:0001085]; tau-protein kinase activity [GO:0050321]; ubiquitin protein ligase binding [GO:0031625] |
| Q02779 | ATP binding [GO:0005524]; bHLH transcription factor binding [GO:0043425]; JUN kinase kinase kinase activity [GO:0004706]; protein homodimerization activity [GO:0042803]; protein kinase activity [GO:0004672]; protein serine/threonine kinase activity [GO:0004674]; transcription corepressor activity [GO:0003714]                                                                                                                                         |
| O95342 | ATP binding [GO:0005524]; bile acid-exporting ATPase activity [GO:0015432]; canalicular bile acid transmembrane transporter activity [GO:0015126]; sodium-exporting ATPase activity, phosphorylative mechanism [GO:0008554]; transporter activity [GO:0005215]                                                                                                                                                                                                 |
| Q13976 | ATP binding [GO:0005524]; calcium channel regulator activity [GO:0005246]; cGMP binding [GO:0030553]; cGMP-dependent protein kinase activity [GO:0004692]                                                                                                                                                                                                                                                                                                      |
| Q96BR1 | ATP binding [GO:0005524]; calcium channel regulator activity [GO:0005246]; chloride channel regulator activity [GO:0017081]; phosphatidylinositol binding [GO:0035091]; potassium channel regulator activity [GO:0015459]; protein kinase activity [GO:0004672]; protein serine/threonine kinase activity [GO:0004674]; sodium channel regulator activity [GO:0017080]                                                                                         |
| Q9HBY8 | ATP binding [GO:0005524]; calcium channel regulator activity [GO:0005246]; chloride channel regulator activity [GO:0017081]; potassium channel regulator activity [GO:0015459]; protein serine/threonine kinase activity [GO:0004674]; sodium channel regulator activity [GO:0017080]                                                                                                                                                                          |
| O00141 | ATP binding [GO:0005524]; calcium channel regulator activity [GO:0005246]; chloride channel regulator activity [GO:0017081]; potassium channel regulator activity [GO:0015459]; protein serine/threonine/tyrosine kinase activity [GO:0004712]; protein serine/threonine kinase activity                                                                                                                                                                       |

|        |                                                                                                                                                                                                                                                                                                                                                                                                                                                      |
|--------|------------------------------------------------------------------------------------------------------------------------------------------------------------------------------------------------------------------------------------------------------------------------------------------------------------------------------------------------------------------------------------------------------------------------------------------------------|
|        | [GO:0004674]; sodium channel regulator activity [GO:0017080]                                                                                                                                                                                                                                                                                                                                                                                         |
| Q96RR4 | ATP binding [GO:0005524]; calcium ion binding [GO:0005509]; calmodulin binding [GO:0005516]; calmodulin-dependent protein kinase activity [GO:0004683]; protein tyrosine kinase activity [GO:0004713]                                                                                                                                                                                                                                                |
| P15056 | ATP binding [GO:0005524]; calcium ion binding [GO:0005509]; identical protein binding [GO:0042802]; MAP kinase kinase activity [GO:0004709]; protein kinase activity [GO:0004672]; protein serine/threonine kinase activity [GO:0004674]                                                                                                                                                                                                             |
| Q14680 | ATP binding [GO:0005524]; calcium ion binding [GO:0005509]; lipid binding [GO:0008289]; non-membrane spanning protein tyrosine kinase activity [GO:0004715]; protein serine/threonine kinase activity [GO:0004674]                                                                                                                                                                                                                                   |
| P17252 | ATP binding [GO:0005524]; calcium-dependent protein kinase C activity [GO:0004698]; enzyme binding [GO:0019899]; histone kinase activity (H3-T6 specific) [GO:0035403]; protein kinase activity [GO:0004672]; protein kinase C activity [GO:0004697]; protein serine/threonine kinase activity [GO:0004674]; zinc ion binding [GO:0008270]                                                                                                           |
| P05129 | ATP binding [GO:0005524]; calcium-dependent protein kinase C activity [GO:0004698]; protein kinase activity [GO:0004672]; protein kinase C activity [GO:0004697]; protein serine/threonine/tyrosine kinase activity [GO:0004712]; zinc ion binding [GO:0008270]                                                                                                                                                                                      |
| Q16566 | ATP binding [GO:0005524]; calcium-dependent protein serine/threonine kinase activity [GO:0009931]; calmodulin binding [GO:0005516]; calmodulin-dependent protein kinase activity [GO:0004683]                                                                                                                                                                                                                                                        |
| Q8IW41 | ATP binding [GO:0005524]; calcium-dependent protein serine/threonine kinase activity [GO:0009931]; calmodulin binding [GO:0005516]; calmodulin-dependent protein kinase activity [GO:0004683]; MAP kinase kinase activity [GO:0004708]; mitogen-activated protein kinase binding [GO:0051019]; p53 binding [GO:0002039]; protein serine/threonine kinase activity [GO:0004674]; signal transducer activity [GO:0004871]                              |
| Q16644 | ATP binding [GO:0005524]; calcium-dependent protein serine/threonine kinase activity [GO:0009931]; calmodulin binding [GO:0005516]; calmodulin-dependent protein kinase activity [GO:0004683]; MAP kinase kinase activity [GO:0004708]; mitogen-activated protein kinase binding [GO:0051019]; protein serine/threonine kinase activity [GO:0004674]; signal transducer activity [GO:0004871]                                                        |
| Q9HBH9 | ATP binding [GO:0005524]; calcium-dependent protein serine/threonine kinase activity [GO:0009931]; calmodulin binding [GO:0005516]; calmodulin-dependent protein kinase activity [GO:0004683]; metal ion binding [GO:0046872]; protein serine/threonine kinase activity [GO:0004674]                                                                                                                                                                 |
| Q13555 | ATP binding [GO:0005524]; calcium-dependent protein serine/threonine phosphatase activity [GO:0004723]; calmodulin binding [GO:0005516]; calmodulin-dependent protein kinase activity [GO:0004683]; protein homodimerization activity [GO:0042803]                                                                                                                                                                                                   |
| Q05655 | ATP binding [GO:0005524]; calcium-independent protein kinase C activity [GO:0004699]; enzyme activator activity [GO:0008047]; enzyme binding [GO:0019899]; insulin receptor substrate binding [GO:0043560]; metal ion binding [GO:0046872]; non-membrane spanning protein tyrosine kinase activity [GO:0004715]; protein kinase activity [GO:0004672]; protein kinase C activity [GO:0004697]; protein serine/threonine kinase activity [GO:0004674] |
| P24723 | ATP binding [GO:0005524]; calcium-independent protein kinase C activity [GO:0004699]; enzyme binding [GO:0019899]; metal ion binding [GO:0046872]; protein kinase C activity [GO:0004697]                                                                                                                                                                                                                                                            |
| Q9UQM7 | ATP binding [GO:0005524]; calmodulin binding [GO:0005516]; calmodulin-dependent protein kinase activity [GO:0004683]; glutamate receptor binding [GO:0035254]; kinase activity [GO:0016301]; protein homodimerization activity [GO:0042803]; protein serine/threonine kinase activity [GO:0004674]                                                                                                                                                   |
| P53355 | ATP binding [GO:0005524]; calmodulin binding [GO:0005516]; calmodulin-dependent protein kinase activity [GO:0004683]; GTP binding [GO:0005525]; identical protein binding [GO:0042802]; protein kinase activity [GO:0004672]; protein serine/threonine kinase activity [GO:0004674]; syntaxin-1 binding [GO:0017075]                                                                                                                                 |
| Q9UIK4 | ATP binding [GO:0005524]; calmodulin binding [GO:0005516]; calmodulin-dependent protein kinase activity [GO:0004683]; identical protein binding [GO:0042802]; protein serine/threonine kinase activity [GO:0004674]                                                                                                                                                                                                                                  |
| Q13557 | ATP binding [GO:0005524]; calmodulin binding [GO:0005516]; calmodulin-dependent protein kinase activity [GO:0004683]; ion channel binding [GO:0044325]; protein homodimerization activity [GO:0042803]; protein serine/threonine kinase activity [GO:0004674]; sodium channel inhibitor activity [GO:0019871]; titin binding [GO:0031432]                                                                                                            |
| Q9H1R3 | ATP binding [GO:0005524]; calmodulin binding [GO:0005516]; calmodulin-dependent protein kinase activity [GO:0004683]; myosin light chain kinase activity [GO:0004687]                                                                                                                                                                                                                                                                                |
| Q14012 | ATP binding [GO:0005524]; calmodulin-dependent protein kinase activity [GO:0004683]                                                                                                                                                                                                                                                                                                                                                                  |

|        |                                                                                                                                                                                                                                                                                                                                                                                                                                                                                                                                     |
|--------|-------------------------------------------------------------------------------------------------------------------------------------------------------------------------------------------------------------------------------------------------------------------------------------------------------------------------------------------------------------------------------------------------------------------------------------------------------------------------------------------------------------------------------------|
| Q6P2M8 | ATP binding [GO:0005524]; calmodulin-dependent protein kinase activity [GO:0004683]                                                                                                                                                                                                                                                                                                                                                                                                                                                 |
| Q8IU85 | ATP binding [GO:0005524]; calmodulin-dependent protein kinase activity [GO:0004683]                                                                                                                                                                                                                                                                                                                                                                                                                                                 |
| Q8N5S9 | ATP binding [GO:0005524]; calmodulin-dependent protein kinase activity [GO:0004683]                                                                                                                                                                                                                                                                                                                                                                                                                                                 |
| Q96NX5 | ATP binding [GO:0005524]; calmodulin-dependent protein kinase activity [GO:0004683]                                                                                                                                                                                                                                                                                                                                                                                                                                                 |
| O43293 | ATP binding [GO:0005524]; calmodulin-dependent protein kinase activity [GO:0004683]; cAMP response element binding protein binding [GO:0008140]; identical protein binding [GO:0042802]; leucine zipper domain binding [GO:0043522]; protein homodimerization activity [GO:0042803]; protein serine/threonine kinase activity [GO:0004674]; Rho GTPase binding [GO:0017048]                                                                                                                                                         |
| Q15746 | ATP binding [GO:0005524]; calmodulin-dependent protein kinase activity [GO:0004683]; metal ion binding [GO:0046872]; myosin light chain kinase activity [GO:0004687]                                                                                                                                                                                                                                                                                                                                                                |
| Q32MK0 | ATP binding [GO:0005524]; calmodulin-dependent protein kinase activity [GO:0004683]; myosin light chain kinase activity [GO:0004687]                                                                                                                                                                                                                                                                                                                                                                                                |
| Q13554 | ATP binding [GO:0005524]; calmodulin-dependent protein kinase activity [GO:0004683]; protein homodimerization activity [GO:0042803]                                                                                                                                                                                                                                                                                                                                                                                                 |
| P22612 | ATP binding [GO:0005524]; cAMP-dependent protein kinase activity [GO:0004691]                                                                                                                                                                                                                                                                                                                                                                                                                                                       |
| P51817 | ATP binding [GO:0005524]; cAMP-dependent protein kinase activity [GO:0004691]                                                                                                                                                                                                                                                                                                                                                                                                                                                       |
| P22694 | ATP binding [GO:0005524]; cAMP-dependent protein kinase activity [GO:0004691]; magnesium ion binding [GO:0000287]; ubiquitin protein ligase binding [GO:0031625]                                                                                                                                                                                                                                                                                                                                                                    |
| P17612 | ATP binding [GO:0005524]; cAMP-dependent protein kinase activity [GO:0004691]; protein kinase A regulatory subunit binding [GO:0034237]; protein kinase binding [GO:0019901]; protein serine/threonine/tyrosine kinase activity [GO:0004712]; ubiquitin protein ligase binding [GO:0031625]                                                                                                                                                                                                                                         |
| P43246 | ATP binding [GO:0005524]; centromeric DNA binding [GO:0019237]; damaged DNA binding [GO:0003684]; DNA binding [GO:0003677]; DNA-dependent ATPase activity [GO:0008094]; double-strand/single-strand DNA junction binding [GO:0000406]; enzyme binding [GO:0019899]; guanine/thymine mispair binding [GO:0032137]; heteroduplex DNA loop binding [GO:0000404]; protein C-terminus binding [GO:0008022]; protein homodimerization activity [GO:0042803]; protein kinase binding [GO:0019901]; Y-form DNA binding [GO:0000403]         |
| P20585 | ATP binding [GO:0005524]; centromeric DNA binding [GO:0019237]; damaged DNA binding [GO:0003684]; DNA-dependent ATPase activity [GO:0008094]; double-strand/single-strand DNA junction binding [GO:0000406]; enzyme binding [GO:0019899]; heteroduplex DNA loop binding [GO:0000404]; Y-form DNA binding [GO:0000403]                                                                                                                                                                                                               |
| Q13237 | ATP binding [GO:0005524]; cGMP binding [GO:0030553]; cGMP-dependent protein kinase activity [GO:0004692]; protein kinase activity [GO:0004672]                                                                                                                                                                                                                                                                                                                                                                                      |
| Q9H4A3 | ATP binding [GO:0005524]; chloride channel inhibitor activity [GO:0019869]; phosphatase binding [GO:0019902]; protein kinase inhibitor activity [GO:0004860]; protein serine/threonine kinase activity [GO:0004674]                                                                                                                                                                                                                                                                                                                 |
| Q9BYP7 | ATP binding [GO:0005524]; chloride channel inhibitor activity [GO:0019869]; protein kinase activity [GO:0004672]; protein serine/threonine kinase activity [GO:0004674]                                                                                                                                                                                                                                                                                                                                                             |
| Q96J92 | ATP binding [GO:0005524]; chloride channel inhibitor activity [GO:0019869]; protein serine/threonine kinase activity [GO:0004674]                                                                                                                                                                                                                                                                                                                                                                                                   |
| P50750 | ATP binding [GO:0005524]; chromatin binding [GO:0003682]; cyclin-dependent protein serine/threonine kinase activity [GO:0004693]; DNA binding [GO:0003677]; protein kinase activity [GO:0004672]; RNA polymerase II carboxy-terminal domain kinase activity [GO:0008353]; snRNA binding [GO:0017069]; transcription regulatory region DNA binding [GO:0044212]                                                                                                                                                                      |
| P52701 | ATP binding [GO:0005524]; chromatin binding [GO:0003682]; damaged DNA binding [GO:0003684]; DNA-dependent ATPase activity [GO:0008094]; guanine/thymine mispair binding [GO:0032137]; methylated histone binding [GO:0035064]; mismatched DNA binding [GO:0030983]                                                                                                                                                                                                                                                                  |
| Q8IYD8 | ATP binding [GO:0005524]; chromatin binding [GO:0003682]; DNA binding [GO:0003677]; helicase activity [GO:0004386]; nuclease activity [GO:0004518]                                                                                                                                                                                                                                                                                                                                                                                  |
| Q13153 | ATP binding [GO:0005524]; collagen binding [GO:0005518]; protein kinase activity [GO:0004672]; protein serine/threonine kinase activity [GO:0004674]; Rac GTPase binding [GO:0048365]                                                                                                                                                                                                                                                                                                                                               |
| Q9Y2W1 | ATP binding [GO:0005524]; core promoter sequence-specific DNA binding [GO:0001046]; ligand-dependent nuclear receptor transcription coactivator activity [GO:0030374]; phosphoprotein binding [GO:0051219]; poly(A) RNA binding [GO:0044822]; receptor activity [GO:0004872]; RNA polymerase II transcription cofactor activity [GO:0001104]; thyroid hormone receptor binding [GO:0046966]; transcription coactivator activity [GO:0003713]; transcription cofactor activity [GO:0003712]; vitamin D receptor binding [GO:0042809] |



|        |                                                                                                                                                                                                                                                                               |
|--------|-------------------------------------------------------------------------------------------------------------------------------------------------------------------------------------------------------------------------------------------------------------------------------|
| O95819 | ATP binding [GO:0005524]; creatine kinase activity [GO:0004111]; protein serine/threonine kinase activity [GO:0004674]                                                                                                                                                        |
| O94921 | ATP binding [GO:0005524]; cyclin binding [GO:0030332]; cyclin-dependent protein serine/threonine kinase activity [GO:0004693]                                                                                                                                                 |
| Q00534 | ATP binding [GO:0005524]; cyclin binding [GO:0030332]; cyclin-dependent protein serine/threonine kinase activity [GO:0004693]                                                                                                                                                 |
| P11802 | ATP binding [GO:0005524]; cyclin binding [GO:0030332]; cyclin-dependent protein serine/threonine kinase activity [GO:0004693]; cyclin-dependent protein serine/threonine kinase regulator activity [GO:0016538]                                                               |
| P24941 | ATP binding [GO:0005524]; cyclin binding [GO:0030332]; cyclin-dependent protein serine/threonine kinase activity [GO:0004693]; metal ion binding [GO:0046872]                                                                                                                 |
| Q14004 | ATP binding [GO:0005524]; cyclin binding [GO:0030332]; cyclin-dependent protein serine/threonine kinase activity [GO:0004693]; poly(A) RNA binding [GO:0044822]; protein kinase activity [GO:0004672]; RNA polymerase II carboxy-terminal domain kinase activity [GO:0008353] |
| Q9NYV4 | ATP binding [GO:0005524]; cyclin binding [GO:0030332]; cyclin-dependent protein serine/threonine kinase activity [GO:0004693]; protein kinase activity [GO:0004672]; RNA polymerase II carboxy-terminal domain kinase activity [GO:0008353]                                   |
| Q00526 | ATP binding [GO:0005524]; cyclin-dependent protein serine/threonine kinase activity [GO:0004693]                                                                                                                                                                              |
| Q00532 | ATP binding [GO:0005524]; cyclin-dependent protein serine/threonine kinase activity [GO:0004693]                                                                                                                                                                              |
| Q07002 | ATP binding [GO:0005524]; cyclin-dependent protein serine/threonine kinase activity [GO:0004693]                                                                                                                                                                              |
| Q15131 | ATP binding [GO:0005524]; cyclin-dependent protein serine/threonine kinase activity [GO:0004693]                                                                                                                                                                              |
| Q5MAI5 | ATP binding [GO:0005524]; cyclin-dependent protein serine/threonine kinase activity [GO:0004693]                                                                                                                                                                              |
| Q8IZL9 | ATP binding [GO:0005524]; cyclin-dependent protein serine/threonine kinase activity [GO:0004693]                                                                                                                                                                              |
| Q9BWU1 | ATP binding [GO:0005524]; cyclin-dependent protein serine/threonine kinase activity [GO:0004693]                                                                                                                                                                              |
| O76039 | ATP binding [GO:0005524]; cyclin-dependent protein serine/threonine kinase activity [GO:0004693]; kinase activity [GO:0016301]; protein kinase activity [GO:0004672]; protein serine/threonine kinase activity [GO:0004674]; Rac GTPase binding [GO:0048365]                  |
| Q9UPZ9 | ATP binding [GO:0005524]; cyclin-dependent protein serine/threonine kinase activity [GO:0004693]; magnesium ion binding [GO:0000287]; protein serine/threonine kinase activity [GO:0004674]                                                                                   |
| Q96Q40 | ATP binding [GO:0005524]; cyclin-dependent protein serine/threonine kinase activity [GO:0004693]; metal ion binding [GO:0046872]; protein serine/threonine kinase activity [GO:0004674]                                                                                       |
| P21127 | ATP binding [GO:0005524]; cyclin-dependent protein serine/threonine kinase activity [GO:0004693]; poly(A) RNA binding [GO:0044822]; protein kinase activity [GO:0004672]; protein serine/threonine kinase activity [GO:0004674]                                               |
| Q00537 | ATP binding [GO:0005524]; cyclin-dependent protein serine/threonine kinase activity [GO:0004693]; protein kinase activity [GO:0004672]                                                                                                                                        |
| Q8IVW4 | ATP binding [GO:0005524]; cyclin-dependent protein serine/threonine kinase activity [GO:0004693]; protein kinase activity [GO:0004672]                                                                                                                                        |
| Q92772 | ATP binding [GO:0005524]; cyclin-dependent protein serine/threonine kinase activity [GO:0004693]; protein kinase activity [GO:0004672]                                                                                                                                        |
| Q9UQ07 | ATP binding [GO:0005524]; cyclin-dependent protein serine/threonine kinase activity [GO:0004693]; protein kinase activity [GO:0004672]; protein serine/threonine kinase activity [GO:0004674]                                                                                 |
| Q9UQ88 | ATP binding [GO:0005524]; cyclin-dependent protein serine/threonine kinase activity [GO:0004693]; protein kinase activity [GO:0004672]; protein serine/threonine kinase activity [GO:0004674]                                                                                 |
| P06493 | ATP binding [GO:0005524]; cyclin-dependent protein serine/threonine kinase activity [GO:0004693]; protein kinase activity [GO:0004672]; protein serine/threonine kinase activity [GO:0004674]; RNA polymerase II carboxy-terminal domain kinase activity [GO:0008353]         |
| P49336 | ATP binding [GO:0005524]; cyclin-dependent protein serine/threonine kinase activity [GO:0004693]; protein kinase activity [GO:0004672]; RNA polymerase II carboxy-terminal domain kinase activity [GO:0008353]; ubiquitin protein ligase activity [GO:0061630]                |
| P20794 | ATP binding [GO:0005524]; cyclin-dependent protein serine/threonine kinase activity [GO:0004693]; protein kinase activity [GO:0004672]; transcription coactivator activity [GO:0003713]                                                                                       |
| Q00536 | ATP binding [GO:0005524]; cyclin-dependent protein serine/threonine kinase activity [GO:0004693]; protein serine/threonine kinase activity [GO:0004674]                                                                                                                       |
| Q9HA77 | ATP binding [GO:0005524]; cysteine-tRNA ligase activity [GO:0004817]; metal ion binding [GO:0046872]                                                                                                                                                                          |

|        |                                                                                                                                                                                                                                                                                                                                                                                                                               |
|--------|-------------------------------------------------------------------------------------------------------------------------------------------------------------------------------------------------------------------------------------------------------------------------------------------------------------------------------------------------------------------------------------------------------------------------------|
| P49589 | ATP binding [GO:0005524]; cysteine-tRNA ligase activity [GO:0004817]; metal ion binding [GO:0046872]; protein homodimerization activity [GO:0042803]; tRNA binding [GO:0000049]                                                                                                                                                                                                                                               |
| P45984 | ATP binding [GO:0005524]; cysteine-type endopeptidase activator activity involved in apoptotic process [GO:0008656]; JUN kinase activity [GO:0004705]; transcription factor binding [GO:0008134]                                                                                                                                                                                                                              |
| P51812 | ATP binding [GO:0005524]; cysteine-type endopeptidase inhibitor activity involved in apoptotic process [GO:0043027]; magnesium ion binding [GO:0000287]; protein kinase activity [GO:0004672]; protein serine/threonine kinase activity [GO:0004674]; ribosomal protein S6 kinase activity [GO:0004711]                                                                                                                       |
| Q15418 | ATP binding [GO:0005524]; cysteine-type endopeptidase inhibitor activity involved in apoptotic process [GO:0043027]; magnesium ion binding [GO:0000287]; protein serine/threonine/tyrosine kinase activity [GO:0004712]; protein serine/threonine kinase activity [GO:0004674]; ribosomal protein S6 kinase activity [GO:0004711]                                                                                             |
| Q13546 | ATP binding [GO:0005524]; death domain binding [GO:0070513]; death receptor binding [GO:0005123]; identical protein binding [GO:0042802]; protein complex binding [GO:0032403]; protein kinase activity [GO:0004672]; protein serine/threonine kinase activity [GO:0004674]; ubiquitin protein ligase binding [GO:0031625]                                                                                                    |
| Q9UPY3 | ATP binding [GO:0005524]; deoxyribonuclease I activity [GO:0004530]; DNA binding [GO:0003677]; double-stranded RNA binding [GO:0003725]; endoribonuclease activity [GO:0004521]; helicase activity [GO:0004386]; metal ion binding [GO:0046872]; miRNA binding [GO:0035198]; pre-miRNA binding [GO:0070883]; protein domain specific binding [GO:0019904]; ribonuclease III activity [GO:0004525]; siRNA binding [GO:0035197] |
| O15457 | ATP binding [GO:0005524]; DNA binding [GO:0003677]; DNA-dependent ATPase activity [GO:0008094]; mismatched DNA binding [GO:0030983]                                                                                                                                                                                                                                                                                           |
| Q9BYX4 | ATP binding [GO:0005524]; DNA binding [GO:0003677]; double-stranded RNA binding [GO:0003725]; helicase activity [GO:0004386]; ribonucleoprotein complex binding [GO:0043021]; single-stranded RNA binding [GO:0003727]; zinc ion binding [GO:0008270]                                                                                                                                                                         |
| Q96C10 | ATP binding [GO:0005524]; DNA binding [GO:0003677]; double-stranded RNA binding [GO:0003725]; helicase activity [GO:0004386]; single-stranded RNA binding [GO:0003727]; zinc ion binding [GO:0008270]                                                                                                                                                                                                                         |
| Q15646 | ATP binding [GO:0005524]; DNA binding [GO:0003677]; double-stranded RNA binding [GO:0003725]; poly(A) RNA binding [GO:0044822]; thyroid hormone receptor binding [GO:0046966]; transferase activity [GO:0016740]                                                                                                                                                                                                              |
| Q9BYK8 | ATP binding [GO:0005524]; DNA binding [GO:0003677]; helicase activity [GO:0004386]; ligand-dependent nuclear receptor transcription coactivator activity [GO:0030374]; metal ion binding [GO:0046872]; poly(A) RNA binding [GO:0044822]                                                                                                                                                                                       |
| P28482 | ATP binding [GO:0005524]; DNA binding [GO:0003677]; MAP kinase activity [GO:0004707]; phosphatase binding [GO:0019902]; protein serine/threonine kinase activity [GO:0004674]; RNA polymerase II carboxy-terminal domain kinase activity [GO:0008353]                                                                                                                                                                         |
| O95786 | ATP binding [GO:0005524]; double-stranded DNA binding [GO:0003690]; double-stranded RNA binding [GO:0003725]; helicase activity [GO:0004386]; identical protein binding [GO:0042802]; single-stranded RNA binding [GO:0003727]; zinc ion binding [GO:0008270]                                                                                                                                                                 |
| Q8IY21 | ATP binding [GO:0005524]; double-stranded DNA binding [GO:0003690]; double-stranded RNA binding [GO:0003725]; helicase activity [GO:0004386]; single-stranded RNA binding [GO:0003727]                                                                                                                                                                                                                                        |
| P19525 | ATP binding [GO:0005524]; double-stranded RNA binding [GO:0003725]; eukaryotic translation initiation factor 2alpha kinase activity [GO:0004694]; non-membrane spanning protein tyrosine kinase activity [GO:0004715]; poly(A) RNA binding [GO:0044822]; protein kinase activity [GO:0004672]; protein phosphatase type 2A regulator activity [GO:0008601]; protein serine/threonine kinase activity [GO:0004674]             |
| Q9NP58 | ATP binding [GO:0005524]; efflux transmembrane transporter activity [GO:0015562]; heme binding [GO:0020037]; heme transporter activity [GO:0015232]; heme-transporting ATPase activity [GO:0015439]                                                                                                                                                                                                                           |
| Q76MJ5 | ATP binding [GO:0005524]; endonuclease activity [GO:0004519]; magnesium ion binding [GO:0000287]; protein serine/threonine kinase activity [GO:0004674]; ribonuclease activity [GO:0004540]                                                                                                                                                                                                                                   |
| Q05823 | ATP binding [GO:0005524]; endoribonuclease activity [GO:0004521]; metal ion binding [GO:0046872]; protein kinase activity [GO:0004672]; ribonucleoprotein complex binding [GO:0043021]; RNA binding [GO:0003723]; rRNA binding [GO:0019843]                                                                                                                                                                                   |
| O14733 | ATP binding [GO:0005524]; enzyme binding [GO:0019899]; JUN kinase kinase activity [GO:0008545]; magnesium ion binding [GO:0000287]; MAP kinase kinase activity [GO:0004708]; protein kinase binding [GO:0019901]; protein phosphatase binding [GO:0019903]; protein serine/threonine kinase                                                                                                                                   |

|        |                                                                                                                                                                                                                                                                                                              |
|--------|--------------------------------------------------------------------------------------------------------------------------------------------------------------------------------------------------------------------------------------------------------------------------------------------------------------|
|        | activity [GO:0004674]; protein tyrosine kinase activity [GO:0004713]                                                                                                                                                                                                                                         |
| Q16539 | ATP binding [GO:0005524]; enzyme binding [GO:0019899]; MAP kinase activity [GO:0004707]; MAP kinase kinase activity [GO:0004708]; NFAT protein binding [GO:0051525]; protein serine/threonine kinase activity [GO:0004674]                                                                                   |
| Q9BQI3 | ATP binding [GO:0005524]; eukaryotic translation initiation factor 2alpha kinase activity [GO:0004694]; heme binding [GO:0020037]; protein homodimerization activity [GO:0042803]                                                                                                                            |
| Q9P2K8 | ATP binding [GO:0005524]; eukaryotic translation initiation factor 2alpha kinase activity [GO:0004694]; protein serine/threonine kinase activity [GO:0004674]                                                                                                                                                |
| Q15835 | ATP binding [GO:0005524]; G-protein coupled receptor kinase activity [GO:0004703]; protein kinase activity [GO:0004672]; rhodopsin kinase activity [GO:0050254]                                                                                                                                              |
| P32298 | ATP binding [GO:0005524]; G-protein coupled receptor kinase activity [GO:0004703]; rhodopsin kinase activity [GO:0050254]                                                                                                                                                                                    |
| Q8WTQ7 | ATP binding [GO:0005524]; G-protein coupled receptor kinase activity [GO:0004703]; rhodopsin kinase activity [GO:0050254]                                                                                                                                                                                    |
| Q8TDC3 | ATP binding [GO:0005524]; gamma-tubulin binding [GO:0043015]; magnesium ion binding [GO:0000287]; protein serine/threonine kinase activity [GO:0004674]; tau-protein kinase activity [GO:0050321]                                                                                                            |
| Q96L34 | ATP binding [GO:0005524]; gamma-tubulin binding [GO:0043015]; microtubule binding [GO:0008017]; protein serine/threonine kinase activity [GO:0004674]; tau-protein kinase activity [GO:0050321]; ubiquitin binding [GO:0043130]                                                                              |
| P07814 | ATP binding [GO:0005524]; glutamate-tRNA ligase activity [GO:0004818]; GTPase binding [GO:0051020]; proline-tRNA ligase activity [GO:0004827]; RNA stem-loop binding [GO:0035613]                                                                                                                            |
| Q5JPH6 | ATP binding [GO:0005524]; glutamate-tRNA(Gln) ligase activity [GO:0050561]; glutamate-tRNA ligase activity [GO:0004818]; tRNA binding [GO:0000049]                                                                                                                                                           |
| P47897 | ATP binding [GO:0005524]; glutamine-tRNA ligase activity [GO:0004819]                                                                                                                                                                                                                                        |
| O75879 | ATP binding [GO:0005524]; glutamyl-tRNA synthase (glutamine-hydrolyzing) activity [GO:0050567]; translation factor activity, RNA binding [GO:0008135]                                                                                                                                                        |
| P41250 | ATP binding [GO:0005524]; glycine-tRNA ligase activity [GO:0004820]; protein dimerization activity [GO:0046983]                                                                                                                                                                                              |
| Q9NWX6 | ATP binding [GO:0005524]; GTP binding [GO:0005525]; identical protein binding [GO:0042802]; magnesium ion binding [GO:0000287]; tRNA binding [GO:0000049]; tRNA guanylyltransferase activity [GO:0008193]                                                                                                    |
| Q9UIJ7 | ATP binding [GO:0005524]; GTP binding [GO:0005525]; nucleoside triphosphate adenylate kinase activity [GO:0046899]                                                                                                                                                                                           |
| Q14978 | ATP binding [GO:0005524]; GTP binding [GO:0005525]; poly(A) RNA binding [GO:0044822]                                                                                                                                                                                                                         |
| P49770 | ATP binding [GO:0005524]; GTP binding [GO:0005525]; translation initiation factor activity [GO:0003743]                                                                                                                                                                                                      |
| O60229 | ATP binding [GO:0005524]; guanyl-nucleotide exchange factor activity [GO:0005085]; metal ion binding [GO:0046872]; protein serine/threonine kinase activity [GO:0004674]; Rho guanyl-nucleotide exchange factor activity [GO:0005089]                                                                        |
| O75962 | ATP binding [GO:0005524]; guanyl-nucleotide exchange factor activity [GO:0005085]; protein serine/threonine kinase activity [GO:0004674]; Rho guanyl-nucleotide exchange factor activity [GO:0005089]                                                                                                        |
| O14936 | ATP binding [GO:0005524]; guanylate kinase activity [GO:0004385]; protein serine/threonine kinase activity [GO:0004674]                                                                                                                                                                                      |
| A2PYH4 | ATP binding [GO:0005524]; helicase activity [GO:0004386]; nucleic acid binding [GO:0003676]                                                                                                                                                                                                                  |
| Q8TDG4 | ATP binding [GO:0005524]; helicase activity [GO:0004386]; nucleic acid binding [GO:0003676]                                                                                                                                                                                                                  |
| Q9Y2R4 | ATP binding [GO:0005524]; helicase activity [GO:0004386]; poly(A) RNA binding [GO:0044822]                                                                                                                                                                                                                   |
| Q5H9U9 | ATP binding [GO:0005524]; helicase activity [GO:0004386]; RNA binding [GO:0003723]                                                                                                                                                                                                                           |
| P12081 | ATP binding [GO:0005524]; histidine-tRNA ligase activity [GO:0004821]                                                                                                                                                                                                                                        |
| P49590 | ATP binding [GO:0005524]; histidine-tRNA ligase activity [GO:0004821]; poly(A) RNA binding [GO:0044822]; protein homodimerization activity [GO:0042803]                                                                                                                                                      |
| Q16513 | ATP binding [GO:0005524]; histone deacetylase binding [GO:0042826]; kinase activity [GO:0016301]; poly(A) RNA binding [GO:0044822]; protein kinase activity [GO:0004672]; protein kinase C activity [GO:0004697]; protein serine/threonine kinase activity [GO:0004674]; RNA polymerase binding [GO:0070063] |

|        |                                                                                                                                                                                                                                                                                                                                                                                                                     |
|--------|---------------------------------------------------------------------------------------------------------------------------------------------------------------------------------------------------------------------------------------------------------------------------------------------------------------------------------------------------------------------------------------------------------------------|
| O75676 | ATP binding [GO:0005524]; histone kinase activity (H3-S10 specific) [GO:0035175]; magnesium ion binding [GO:0000287]; mitogen-activated protein kinase p38 binding [GO:0048273]; protein serine/threonine kinase activity [GO:0004674]; ribosomal protein S6 kinase activity [GO:0004711]                                                                                                                           |
| O75582 | ATP binding [GO:0005524]; histone kinase activity (H3-S10 specific) [GO:0035175]; magnesium ion binding [GO:0000287]; protein kinase activity [GO:0004672]; protein serine/threonine kinase activity [GO:0004674]                                                                                                                                                                                                   |
| O14757 | ATP binding [GO:0005524]; histone kinase activity (H3-T11 specific) [GO:0035402]; protein kinase activity [GO:0004672]; protein serine/threonine kinase activity [GO:0004674]                                                                                                                                                                                                                                       |
| Q96GD4 | ATP binding [GO:0005524]; histone serine kinase activity [GO:0035174]; metal ion binding [GO:0046872]; protein serine/threonine/tyrosine kinase activity [GO:0004712]; protein serine/threonine kinase activity [GO:0004674]                                                                                                                                                                                        |
| O14965 | ATP binding [GO:0005524]; histone serine kinase activity [GO:0035174]; protein kinase activity [GO:0004672]; protein kinase binding [GO:0019901]; protein serine/threonine/tyrosine kinase activity [GO:0004712]; protein serine/threonine kinase activity [GO:0004674]                                                                                                                                             |
| Q9UQB9 | ATP binding [GO:0005524]; histone serine kinase activity [GO:0035174]; protein kinase activity [GO:0004672]; protein serine/threonine/tyrosine kinase activity [GO:0004712]                                                                                                                                                                                                                                         |
| P68400 | ATP binding [GO:0005524]; Hsp90 protein binding [GO:0051879]; protein N-terminus binding [GO:0047485]; protein serine/threonine kinase activity [GO:0004674]                                                                                                                                                                                                                                                        |
| Q16584 | ATP binding [GO:0005524]; identical protein binding [GO:0042802]; JUN kinase kinase kinase activity [GO:0004706]; mitogen-activated protein kinase kinase kinase binding [GO:0031435]; protein homodimerization activity [GO:0042803]; protein kinase activity [GO:0004672]; protein serine/threonine kinase activity [GO:0004674]; protein tyrosine kinase activity [GO:0004713]                                   |
| Q13043 | ATP binding [GO:0005524]; identical protein binding [GO:0042802]; magnesium ion binding [GO:0000287]; MAP kinase kinase kinase activity [GO:0004709]; protein dimerization activity [GO:0046983]; protein homodimerization activity [GO:0042803]; protein serine/threonine kinase activator activity [GO:0043539]; protein serine/threonine kinase activity [GO:0004674]; transcription factor binding [GO:0008134] |
| Q9P289 | ATP binding [GO:0005524]; identical protein binding [GO:0042802]; magnesium ion binding [GO:0000287]; protein homodimerization activity [GO:0042803]; protein kinase activity [GO:0004672]; protein serine/threonine kinase activity [GO:0004674]                                                                                                                                                                   |
| Q5VT25 | ATP binding [GO:0005524]; identical protein binding [GO:0042802]; magnesium ion binding [GO:0000287]; protein serine/threonine kinase activity [GO:0004674]                                                                                                                                                                                                                                                         |
| O43283 | ATP binding [GO:0005524]; identical protein binding [GO:0042802]; MAP kinase kinase kinase activity [GO:0004709]; metal ion binding [GO:0046872]; protein homodimerization activity [GO:0042803]; protein kinase binding [GO:0019901]; protein serine/threonine kinase activity [GO:0004674]                                                                                                                        |
| P04049 | ATP binding [GO:0005524]; identical protein binding [GO:0042802]; MAP kinase kinase kinase activity [GO:0004709]; metal ion binding [GO:0046872]; protein kinase activity [GO:0004672]; protein serine/threonine kinase activity [GO:0004674]                                                                                                                                                                       |
| O96017 | ATP binding [GO:0005524]; identical protein binding [GO:0042802]; metal ion binding [GO:0046872]; protein homodimerization activity [GO:0042803]; protein kinase binding [GO:0019901]; protein serine/threonine kinase activity [GO:0004674]; ubiquitin protein ligase binding [GO:0031625]                                                                                                                         |
| Q15139 | ATP binding [GO:0005524]; identical protein binding [GO:0042802]; metal ion binding [GO:0046872]; protein kinase C activity [GO:0004697]; protein serine/threonine kinase activity [GO:0004674]                                                                                                                                                                                                                     |
| Q9Y572 | ATP binding [GO:0005524]; identical protein binding [GO:0042802]; NF-kappaB-inducing kinase activity [GO:0004704]; protein complex binding [GO:0032403]; protein kinase activity [GO:0004672]; protein serine/threonine kinase activity [GO:0004674]; transcription coactivator activity [GO:0003713]                                                                                                               |
| O94804 | ATP binding [GO:0005524]; identical protein binding [GO:0042802]; polo kinase kinase activity [GO:0042801]; protein homodimerization activity [GO:0042803]; protein serine/threonine kinase activity [GO:0004674]                                                                                                                                                                                                   |
| Q13177 | ATP binding [GO:0005524]; identical protein binding [GO:0042802]; protein kinase activity [GO:0004672]; protein kinase binding [GO:0019901]; protein serine/threonine kinase activity [GO:0004674]; protein tyrosine kinase activator activity [GO:0030296]; Rac GTPase binding [GO:0048365]                                                                                                                        |
| O14920 | ATP binding [GO:0005524]; IkappaB kinase activity [GO:0008384]; protein heterodimerization activity [GO:0046982]; protein homodimerization activity [GO:0042803]; protein kinase activity [GO:0004672]; protein kinase binding [GO:0019901]; protein serine/threonine kinase activity [GO:0004674]; scaffold protein binding [GO:0097110]                                                                           |
| O15111 | ATP binding [GO:0005524]; IkappaB kinase activity [GO:0008384]; protein heterodimerization activity [GO:0046982]; protein homodimerization activity [GO:0042803]; protein kinase activity [GO:0004672];                                                                                                                                                                                                             |

|        |                                                                                                                                                                                                                                                                                                                        |
|--------|------------------------------------------------------------------------------------------------------------------------------------------------------------------------------------------------------------------------------------------------------------------------------------------------------------------------|
|        | scaffold protein binding [GO:0097110]                                                                                                                                                                                                                                                                                  |
| Q9H8X2 | ATP binding [GO:0005524]; inositol pentakisphosphate 2-kinase activity [GO:0035299]                                                                                                                                                                                                                                    |
| Q05513 | ATP binding [GO:0005524]; insulin receptor substrate binding [GO:0043560]; metal ion binding [GO:0046872]; potassium channel regulator activity [GO:0015459]; protein kinase activity [GO:0004672]; protein kinase C activity [GO:0004697]; protein serine/threonine kinase activity [GO:0004674]                      |
| P54577 | ATP binding [GO:0005524]; interleukin-8 receptor binding [GO:0005153]; poly(A) RNA binding [GO:0044822]; signal transducer activity [GO:0004871]; tRNA binding [GO:0000049]; tyrosine-tRNA ligase activity [GO:0004831]                                                                                                |
| P45985 | ATP binding [GO:0005524]; JUN kinase kinase activity [GO:0008545]; protein kinase activity [GO:0004672]; protein serine/threonine kinase activity [GO:0004674]; protein tyrosine kinase activity [GO:0004713]                                                                                                          |
| P80192 | ATP binding [GO:0005524]; JUN kinase kinase kinase activity [GO:0004706]; MAP kinase kinase activity [GO:0004708]; protein homodimerization activity [GO:0042803]; protein serine/threonine kinase activity [GO:0004674]; protein tyrosine kinase activity [GO:0004713]                                                |
| Q13233 | ATP binding [GO:0005524]; JUN kinase kinase kinase activity [GO:0004706]; MAP kinase kinase kinase activity [GO:0004709]; protein kinase activity [GO:0004672]; protein kinase binding [GO:0019901]; zinc ion binding [GO:0008270]                                                                                     |
| Q96PY6 | ATP binding [GO:0005524]; kinase activity [GO:0016301]; MAP kinase kinase activity [GO:0004708]; metal ion binding [GO:0046872]; protein kinase activity [GO:0004672]; protein serine/threonine kinase activity [GO:0004674]; protein tyrosine kinase activity [GO:0004713]                                            |
| Q99640 | ATP binding [GO:0005524]; kinase activity [GO:0016301]; metal ion binding [GO:0046872]; protein kinase activity [GO:0004672]; protein serine/threonine kinase activity [GO:0004674]                                                                                                                                    |
| O94806 | ATP binding [GO:0005524]; kinase activity [GO:0016301]; metal ion binding [GO:0046872]; protein kinase C activity [GO:0004697]                                                                                                                                                                                         |
| Q96GX5 | ATP binding [GO:0005524]; kinase activity [GO:0016301]; protein phosphatase 2A binding [GO:0051721]; protein serine/threonine kinase activity [GO:0004674]                                                                                                                                                             |
| Q8IV42 | ATP binding [GO:0005524]; kinase activity [GO:0016301]; tRNA binding [GO:0000049]                                                                                                                                                                                                                                      |
| Q9HC98 | ATP binding [GO:0005524]; kinesin binding [GO:0019894]; magnesium ion binding [GO:0000287]; protein kinase binding [GO:0019901]; protein serine/threonine kinase activity [GO:0004674]; signal transducer activity [GO:0004871]                                                                                        |
| Q7KZI7 | ATP binding [GO:0005524]; lipid binding [GO:0008289]; magnesium ion binding [GO:0000287]; poly(A) RNA binding [GO:0044822]; protein kinase activator activity [GO:0030295]; protein serine/threonine kinase activity [GO:0004674]; tau-protein kinase activity [GO:0050321]                                            |
| P51003 | ATP binding [GO:0005524]; magnesium ion binding [GO:0000287]; manganese ion binding [GO:0030145]; polynucleotide adenylyltransferase activity [GO:0004652]; RNA binding [GO:0003723]                                                                                                                                   |
| Q92630 | ATP binding [GO:0005524]; magnesium ion binding [GO:0000287]; manganese ion binding [GO:0030145]; protein serine/threonine/tyrosine kinase activity [GO:0004712]; protein serine/threonine kinase activity [GO:0004674]; protein tyrosine kinase activity [GO:0004713]; ubiquitin binding [GO:0043130]                 |
| Q9UBE8 | ATP binding [GO:0005524]; magnesium ion binding [GO:0000287]; MAP kinase activity [GO:0004707]; protein kinase activity [GO:0004672]; protein serine/threonine kinase activity [GO:0004674]; SH2 domain binding [GO:0042169]; transcription factor binding [GO:0008134]; ubiquitin protein ligase binding [GO:0031625] |
| P53778 | ATP binding [GO:0005524]; magnesium ion binding [GO:0000287]; MAP kinase activity [GO:0004707]; protein serine/threonine kinase activity [GO:0004674]                                                                                                                                                                  |
| O43318 | ATP binding [GO:0005524]; magnesium ion binding [GO:0000287]; MAP kinase kinase activity [GO:0004708]; MAP kinase kinase kinase activity [GO:0004709]; protein kinase activity [GO:0004672]; protein serine/threonine kinase activity [GO:0004674]; scaffold protein binding [GO:0097110]                              |
| O95382 | ATP binding [GO:0005524]; magnesium ion binding [GO:0000287]; MAP kinase kinase kinase activity [GO:0004709]                                                                                                                                                                                                           |
| Q13188 | ATP binding [GO:0005524]; magnesium ion binding [GO:0000287]; MAP kinase kinase kinase activity [GO:0004709]; protein dimerization activity [GO:0046983]; protein kinase activity [GO:0004672]; protein serine/threonine kinase activator activity [GO:0043539]; protein serine/threonine kinase activity [GO:0004674] |
| Q99683 | ATP binding [GO:0005524]; magnesium ion binding [GO:0000287]; MAP kinase kinase kinase activity [GO:0004709]; protein homodimerization activity [GO:0042803]; protein kinase activity [GO:0004672]; protein phosphatase binding [GO:0019903]                                                                           |

|        |                                                                                                                                                                                                                                                                                                            |
|--------|------------------------------------------------------------------------------------------------------------------------------------------------------------------------------------------------------------------------------------------------------------------------------------------------------------|
| Q6P0Q8 | ATP binding [GO:0005524]; magnesium ion binding [GO:0000287]; microtubule binding [GO:0008017]; phosphatase binding [GO:0019902]; protein serine/threonine kinase activity [GO:0004674]                                                                                                                    |
| Q15208 | ATP binding [GO:0005524]; magnesium ion binding [GO:0000287]; mitogen-activated protein kinase kinase binding [GO:0031435]; protein serine/threonine kinase activity [GO:0004674]                                                                                                                          |
| P0C1S8 | ATP binding [GO:0005524]; magnesium ion binding [GO:0000287]; non-membrane spanning protein tyrosine kinase activity [GO:0004715]                                                                                                                                                                          |
| Q15831 | ATP binding [GO:0005524]; magnesium ion binding [GO:0000287]; p53 binding [GO:0002039]; protein kinase activator activity [GO:0030295]; protein serine/threonine kinase activity [GO:0004674]                                                                                                              |
| Q9NSD9 | ATP binding [GO:0005524]; magnesium ion binding [GO:0000287]; phenylalanine-tRNA ligase activity [GO:0004826]; RNA binding [GO:0003723]                                                                                                                                                                    |
| O95363 | ATP binding [GO:0005524]; magnesium ion binding [GO:0000287]; phenylalanine-tRNA ligase activity [GO:0004826]; tRNA binding [GO:0000049]                                                                                                                                                                   |
| Q9P0L2 | ATP binding [GO:0005524]; magnesium ion binding [GO:0000287]; phosphatidic acid binding [GO:0070300]; phosphatidylinositol-4,5-bisphosphate binding [GO:0005546]; phosphatidylserine binding [GO:0001786]; protein serine/threonine kinase activity [GO:0004674]; tau-protein kinase activity [GO:0050321] |
| Q9NWZ3 | ATP binding [GO:0005524]; magnesium ion binding [GO:0000287]; protein kinase activity [GO:0004672]; protein serine/threonine kinase activity [GO:0004674]                                                                                                                                                  |
| Q9Y5S2 | ATP binding [GO:0005524]; magnesium ion binding [GO:0000287]; protein kinase activity [GO:0004672]; protein serine/threonine kinase activity [GO:0004674]                                                                                                                                                  |
| O43781 | ATP binding [GO:0005524]; magnesium ion binding [GO:0000287]; protein kinase activity [GO:0004672]; protein serine/threonine/tyrosine kinase activity [GO:0004712]; protein serine/threonine kinase activity [GO:0004674]; protein tyrosine kinase activity [GO:0004713]                                   |
| Q9UK32 | ATP binding [GO:0005524]; magnesium ion binding [GO:0000287]; protein kinase activity [GO:0004672]; ribosomal protein S6 kinase activity [GO:0004711]                                                                                                                                                      |
| O95835 | ATP binding [GO:0005524]; magnesium ion binding [GO:0000287]; protein kinase binding [GO:0019901]; protein serine/threonine kinase activity [GO:0004674]                                                                                                                                                   |
| O15021 | ATP binding [GO:0005524]; magnesium ion binding [GO:0000287]; protein serine/threonine kinase activity [GO:0004674]                                                                                                                                                                                        |
| O60307 | ATP binding [GO:0005524]; magnesium ion binding [GO:0000287]; protein serine/threonine kinase activity [GO:0004674]                                                                                                                                                                                        |
| Q6DT37 | ATP binding [GO:0005524]; magnesium ion binding [GO:0000287]; protein serine/threonine kinase activity [GO:0004674]                                                                                                                                                                                        |
| Q6SA08 | ATP binding [GO:0005524]; magnesium ion binding [GO:0000287]; protein serine/threonine kinase activity [GO:0004674]                                                                                                                                                                                        |
| Q8IY84 | ATP binding [GO:0005524]; magnesium ion binding [GO:0000287]; protein serine/threonine kinase activity [GO:0004674]                                                                                                                                                                                        |
| Q96PF2 | ATP binding [GO:0005524]; magnesium ion binding [GO:0000287]; protein serine/threonine kinase activity [GO:0004674]                                                                                                                                                                                        |
| Q96PN8 | ATP binding [GO:0005524]; magnesium ion binding [GO:0000287]; protein serine/threonine kinase activity [GO:0004674]                                                                                                                                                                                        |
| Q9BXA7 | ATP binding [GO:0005524]; magnesium ion binding [GO:0000287]; protein serine/threonine kinase activity [GO:0004674]                                                                                                                                                                                        |
| Q9H093 | ATP binding [GO:0005524]; magnesium ion binding [GO:0000287]; protein serine/threonine kinase activity [GO:0004674]                                                                                                                                                                                        |
| Q9H0K1 | ATP binding [GO:0005524]; magnesium ion binding [GO:0000287]; protein serine/threonine kinase activity [GO:0004674]                                                                                                                                                                                        |
| Q9NRH2 | ATP binding [GO:0005524]; magnesium ion binding [GO:0000287]; protein serine/threonine kinase activity [GO:0004674]                                                                                                                                                                                        |
| Q9Y2H1 | ATP binding [GO:0005524]; magnesium ion binding [GO:0000287]; protein serine/threonine kinase activity [GO:0004674]                                                                                                                                                                                        |
| Q9Y2H9 | ATP binding [GO:0005524]; magnesium ion binding [GO:0000287]; protein serine/threonine kinase activity [GO:0004674]                                                                                                                                                                                        |
| Q9Y2K2 | ATP binding [GO:0005524]; magnesium ion binding [GO:0000287]; protein serine/threonine kinase activity [GO:0004674]                                                                                                                                                                                        |
| O95747 | ATP binding [GO:0005524]; magnesium ion binding [GO:0000287]; protein serine/threonine kinase activity [GO:0004674]; receptor signaling protein serine/threonine kinase activity [GO:0004702]                                                                                                              |
| Q9NRP7 | ATP binding [GO:0005524]; magnesium ion binding [GO:0000287]; protein serine/threonine kinase activity [GO:0004674]; transcription factor binding [GO:0008134]                                                                                                                                             |

|        |                                                                                                                                                                                                                                                                                                                                                                                                                                                                                                         |
|--------|---------------------------------------------------------------------------------------------------------------------------------------------------------------------------------------------------------------------------------------------------------------------------------------------------------------------------------------------------------------------------------------------------------------------------------------------------------------------------------------------------------|
| Q15349 | ATP binding [GO:0005524]; magnesium ion binding [GO:0000287]; protein serine/threonine/tyrosine kinase activity [GO:0004712]; protein serine/threonine kinase activity [GO:0004674]; ribosomal protein S6 kinase activity [GO:0004711]                                                                                                                                                                                                                                                                  |
| Q9BRP7 | ATP binding [GO:0005524]; magnesium ion binding [GO:0000287]; rRNA (uridine-N3-)-methyltransferase activity [GO:0070042]; tRNA binding [GO:0000049]                                                                                                                                                                                                                                                                                                                                                     |
| P51957 | ATP binding [GO:0005524]; manganese ion binding [GO:0030145]; protein serine/threonine kinase activity [GO:0004674]                                                                                                                                                                                                                                                                                                                                                                                     |
| P11309 | ATP binding [GO:0005524]; manganese ion binding [GO:0030145]; protein serine/threonine kinase activity [GO:0004674]; ribosomal small subunit binding [GO:0043024]; transcription factor binding [GO:0008134]                                                                                                                                                                                                                                                                                            |
| Q13164 | ATP binding [GO:0005524]; MAP kinase activity [GO:0004707]; mitogen-activated protein kinase binding [GO:0051019]                                                                                                                                                                                                                                                                                                                                                                                       |
| P27361 | ATP binding [GO:0005524]; MAP kinase activity [GO:0004707]; phosphatase binding [GO:0019902]                                                                                                                                                                                                                                                                                                                                                                                                            |
| O15264 | ATP binding [GO:0005524]; MAP kinase activity [GO:0004707]; protein serine/threonine kinase activity [GO:0004674]                                                                                                                                                                                                                                                                                                                                                                                       |
| Q15759 | ATP binding [GO:0005524]; MAP kinase activity [GO:0004707]; protein serine/threonine kinase activity [GO:0004674]                                                                                                                                                                                                                                                                                                                                                                                       |
| Q8TD08 | ATP binding [GO:0005524]; MAP kinase activity [GO:0004707]; SH3 domain binding [GO:0017124]                                                                                                                                                                                                                                                                                                                                                                                                             |
| Q9Y6R4 | ATP binding [GO:0005524]; MAP kinase kinase activity [GO:0004708]; MAP kinase kinase kinase activity [GO:0004709]; metal ion binding [GO:0046872]                                                                                                                                                                                                                                                                                                                                                       |
| Q99759 | ATP binding [GO:0005524]; MAP kinase kinase activity [GO:0004708]; MAP kinase kinase kinase activity [GO:0004709]; metal ion binding [GO:0046872]; protein kinase activity [GO:0004672]                                                                                                                                                                                                                                                                                                                 |
| Q9Y2U5 | ATP binding [GO:0005524]; MAP kinase kinase activity [GO:0004708]; MAP kinase kinase kinase activity [GO:0004709]; metal ion binding [GO:0046872]; protein kinase activity [GO:0004672]; protein kinase binding [GO:0019901]; protein serine/threonine kinase activity [GO:0004674]                                                                                                                                                                                                                     |
| Q99558 | ATP binding [GO:0005524]; MAP kinase kinase activity [GO:0004708]; MAP kinase kinase kinase activity [GO:0004709]; NF-kappaB-inducing kinase activity [GO:0004704]; protein kinase activity [GO:0004672]; protein serine/threonine kinase activity [GO:0004674]                                                                                                                                                                                                                                         |
| Q13163 | ATP binding [GO:0005524]; MAP kinase kinase activity [GO:0004708]; metal ion binding [GO:0046872]; protein kinase activity [GO:0004672]; protein serine/threonine kinase activity [GO:0004674]; protein tyrosine kinase activity [GO:0004713]                                                                                                                                                                                                                                                           |
| O75914 | ATP binding [GO:0005524]; MAP kinase kinase activity [GO:0004708]; metal ion binding [GO:0046872]; protein serine/threonine kinase activity [GO:0004674]; Rac GTPase binding [GO:0048365]                                                                                                                                                                                                                                                                                                               |
| P36507 | ATP binding [GO:0005524]; MAP kinase kinase activity [GO:0004708]; PDZ domain binding [GO:0030165]; protein serine/threonine/tyrosine kinase activity [GO:0004712]; protein serine/threonine kinase activator activity [GO:0043539]; protein serine/threonine kinase activity [GO:0004674]; protein tyrosine kinase activity [GO:0004713]; scaffold protein binding [GO:0097110]                                                                                                                        |
| Q02750 | ATP binding [GO:0005524]; MAP kinase kinase activity [GO:0004708]; protein C-terminus binding [GO:0008022]; protein kinase activity [GO:0004672]; protein N-terminus binding [GO:0047485]; protein serine/threonine/tyrosine kinase activity [GO:0004712]; protein serine/threonine kinase activator activity [GO:0043539]; protein serine/threonine kinase activity [GO:0004674]; protein tyrosine kinase activity [GO:0004713]; receptor signaling protein tyrosine phosphatase activity [GO:0004728] |
| P46734 | ATP binding [GO:0005524]; MAP kinase kinase activity [GO:0004708]; protein kinase binding [GO:0019901]; protein serine/threonine kinase activity [GO:0004674]; protein tyrosine kinase activity [GO:0004713]                                                                                                                                                                                                                                                                                            |
| P52564 | ATP binding [GO:0005524]; MAP kinase kinase activity [GO:0004708]; protein kinase binding [GO:0019901]; protein serine/threonine kinase activity [GO:0004674]; protein tyrosine kinase activity [GO:0004713]                                                                                                                                                                                                                                                                                            |
| Q56UN5 | ATP binding [GO:0005524]; MAP kinase kinase kinase activity [GO:0004709]                                                                                                                                                                                                                                                                                                                                                                                                                                |
| Q6ZN16 | ATP binding [GO:0005524]; MAP kinase kinase kinase activity [GO:0004709]; metal ion binding [GO:0046872]                                                                                                                                                                                                                                                                                                                                                                                                |
| Q12851 | ATP binding [GO:0005524]; MAP kinase kinase kinase activity [GO:0008349]; mitogen-activated protein kinase kinase kinase binding [GO:0031435]; protein serine/threonine kinase activity [GO:0004674]                                                                                                                                                                                                                                                                                                    |
| Q8IVH8 | ATP binding [GO:0005524]; MAP kinase kinase kinase activity [GO:0008349]; protein kinase activity [GO:0004672]; protein serine/threonine kinase activity [GO:0004674]                                                                                                                                                                                                                                                                                                                                   |
| Q92918 | ATP binding [GO:0005524]; MAP kinase kinase kinase activity [GO:0008349]; protein kinase                                                                                                                                                                                                                                                                                                                                                                                                                |

|        |                                                                                                                                                                                                                                                                                                    |
|--------|----------------------------------------------------------------------------------------------------------------------------------------------------------------------------------------------------------------------------------------------------------------------------------------------------|
|        | activity [GO:0004672]; protein serine/threonine kinase activity [GO:0004674]                                                                                                                                                                                                                       |
| P22102 | ATP binding [GO:0005524]; metal ion binding [GO:0046872]; methyltransferase activity [GO:0008168]; phosphoribosylamine-glycine ligase activity [GO:0004637]; phosphoribosylformylglycinamide cyclo-ligase activity [GO:0004641]; phosphoribosylglycinamide formyltransferase activity [GO:0004644] |
| Q09013 | ATP binding [GO:0005524]; metal ion binding [GO:0046872]; myosin phosphatase regulator activity [GO:0017020]; protein serine/threonine kinase activity [GO:0004674]                                                                                                                                |
| O60285 | ATP binding [GO:0005524]; metal ion binding [GO:0046872]; p53 binding [GO:0002039]; protein serine/threonine kinase activity [GO:0004674]                                                                                                                                                          |
| O14578 | ATP binding [GO:0005524]; metal ion binding [GO:0046872]; PDZ domain binding [GO:0030165]; protein serine/threonine kinase activity [GO:0004674]; scaffold protein binding [GO:0097110]                                                                                                            |
| P41743 | ATP binding [GO:0005524]; metal ion binding [GO:0046872]; phospholipid binding [GO:0005543]; protein kinase activity [GO:0004672]; protein kinase C activity [GO:0004697]; protein serine/threonine kinase activity [GO:0004674]                                                                   |
| O75116 | ATP binding [GO:0005524]; metal ion binding [GO:0046872]; poly(A) RNA binding [GO:0044822]; protein serine/threonine kinase activity [GO:0004674]; Rho-dependent protein serine/threonine kinase activity [GO:0072518]; structural molecule activity [GO:0005198]                                  |
| Q9Y3I0 | ATP binding [GO:0005524]; metal ion binding [GO:0046872]; poly(A) RNA binding [GO:0044822]; RNA ligase (ATP) activity [GO:0003972]; vinculin binding [GO:0017166]                                                                                                                                  |
| Q6PIY7 | ATP binding [GO:0005524]; metal ion binding [GO:0046872]; polynucleotide adenylyltransferase activity [GO:0004652]                                                                                                                                                                                 |
| Q9BWT3 | ATP binding [GO:0005524]; metal ion binding [GO:0046872]; polynucleotide adenylyltransferase activity [GO:0004652]; RNA binding [GO:0003723]                                                                                                                                                       |
| Q9NRJ5 | ATP binding [GO:0005524]; metal ion binding [GO:0046872]; polynucleotide adenylyltransferase activity [GO:0004652]; RNA binding [GO:0003723]                                                                                                                                                       |
| Q59H18 | ATP binding [GO:0005524]; metal ion binding [GO:0046872]; protein C-terminus binding [GO:0008022]; protein kinase activity [GO:0004672]; protein serine/threonine kinase activity [GO:0004674]; troponin I binding [GO:0031013]                                                                    |
| O00506 | ATP binding [GO:0005524]; metal ion binding [GO:0046872]; protein homodimerization activity [GO:0042803]; protein kinase activity [GO:0004672]; protein serine/threonine kinase activity [GO:0004674]                                                                                              |
| Q9BZL6 | ATP binding [GO:0005524]; metal ion binding [GO:0046872]; protein kinase activity [GO:0004672]; protein kinase C activity [GO:0004697]; protein serine/threonine kinase activity [GO:0004674]                                                                                                      |
| P51955 | ATP binding [GO:0005524]; metal ion binding [GO:0046872]; protein kinase activity [GO:0004672]; protein phosphatase binding [GO:0019903]; protein serine/threonine kinase activity [GO:0004674]                                                                                                    |
| Q13464 | ATP binding [GO:0005524]; metal ion binding [GO:0046872]; protein kinase activity [GO:0004672]; protein serine/threonine kinase activity [GO:0004674]                                                                                                                                              |
| Q6ZWH5 | ATP binding [GO:0005524]; metal ion binding [GO:0046872]; protein kinase activity [GO:0004672]; protein serine/threonine kinase activity [GO:0004674]                                                                                                                                              |
| Q9Y6E0 | ATP binding [GO:0005524]; metal ion binding [GO:0046872]; protein kinase activity [GO:0004672]; protein serine/threonine kinase activity [GO:0004674]                                                                                                                                              |
| Q8TD19 | ATP binding [GO:0005524]; metal ion binding [GO:0046872]; protein kinase binding [GO:0019901]; protein serine/threonine kinase activity [GO:0004674]                                                                                                                                               |
| Q04759 | ATP binding [GO:0005524]; metal ion binding [GO:0046872]; protein kinase C activity [GO:0004697]; protein serine/threonine kinase activity [GO:0004674]; ubiquitin-protein transferase activity [GO:0004842]                                                                                       |
| P51956 | ATP binding [GO:0005524]; metal ion binding [GO:0046872]; protein serine/threonine kinase activity [GO:0004674]                                                                                                                                                                                    |
| Q6P3R8 | ATP binding [GO:0005524]; metal ion binding [GO:0046872]; protein serine/threonine kinase activity [GO:0004674]                                                                                                                                                                                    |
| Q86SG6 | ATP binding [GO:0005524]; metal ion binding [GO:0046872]; protein serine/threonine kinase activity [GO:0004674]                                                                                                                                                                                    |
| Q86UX6 | ATP binding [GO:0005524]; metal ion binding [GO:0046872]; protein serine/threonine kinase activity [GO:0004674]                                                                                                                                                                                    |
| Q8NG66 | ATP binding [GO:0005524]; metal ion binding [GO:0046872]; protein serine/threonine kinase activity [GO:0004674]                                                                                                                                                                                    |
| Q8TDX7 | ATP binding [GO:0005524]; metal ion binding [GO:0046872]; protein serine/threonine kinase activity [GO:0004674]                                                                                                                                                                                    |
| Q8WU08 | ATP binding [GO:0005524]; metal ion binding [GO:0046872]; protein serine/threonine kinase activity [GO:0004674]                                                                                                                                                                                    |



|        |                                                                                                                                                                                                                                                                                                                                                                                    |
|--------|------------------------------------------------------------------------------------------------------------------------------------------------------------------------------------------------------------------------------------------------------------------------------------------------------------------------------------------------------------------------------------|
| Q9NRM7 | ATP binding [GO:0005524]; metal ion binding [GO:0046872]; protein serine/threonine kinase activity [GO:0004674]                                                                                                                                                                                                                                                                    |
| Q9NY57 | ATP binding [GO:0005524]; metal ion binding [GO:0046872]; protein serine/threonine kinase activity [GO:0004674]                                                                                                                                                                                                                                                                    |
| Q15569 | ATP binding [GO:0005524]; metal ion binding [GO:0046872]; protein serine/threonine/tyrosine kinase activity [GO:0004712]; protein serine/threonine kinase activity [GO:0004674]; protein tyrosine kinase activity [GO:0004713]                                                                                                                                                     |
| Q9NR20 | ATP binding [GO:0005524]; metal ion binding [GO:0046872]; protein serine/threonine/tyrosine kinase activity [GO:0004712]; protein serine/threonine kinase activity [GO:0004674]; protein tyrosine kinase activity [GO:0004713]                                                                                                                                                     |
| Q9H3H1 | ATP binding [GO:0005524]; metal ion binding [GO:0046872]; tRNA dimethylallyltransferase activity [GO:0052381]                                                                                                                                                                                                                                                                      |
| Q96GW9 | ATP binding [GO:0005524]; methionine-tRNA ligase activity [GO:0004825]                                                                                                                                                                                                                                                                                                             |
| P56192 | ATP binding [GO:0005524]; methionine-tRNA ligase activity [GO:0004825]; tRNA binding [GO:0000049]                                                                                                                                                                                                                                                                                  |
| Q8WXR4 | ATP binding [GO:0005524]; microfilament motor activity [GO:0000146]; protein serine/threonine kinase activity [GO:0004674]                                                                                                                                                                                                                                                         |
| Q9H0A0 | ATP binding [GO:0005524]; N-acetyltransferase activity [GO:0008080]; poly(A) RNA binding [GO:0044822]                                                                                                                                                                                                                                                                              |
| Q13627 | ATP binding [GO:0005524]; non-membrane spanning protein tyrosine kinase activity [GO:0004715]; protein kinase activity [GO:0004672]; protein self-association [GO:0043621]; protein serine/threonine/tyrosine kinase activity [GO:0004712]; protein serine/threonine kinase activity [GO:0004674]; protein tyrosine kinase activity [GO:0004713]; tau protein binding [GO:0048156] |
| Q9BSD7 | ATP binding [GO:0005524]; nucleoside-triphosphatase activity [GO:0017111]; nucleotide phosphatase activity, acting on free nucleotides [GO:0098519]; poly(A) RNA binding [GO:0044822]                                                                                                                                                                                              |
| Q9NP78 | ATP binding [GO:0005524]; oligopeptide-transporting ATPase activity [GO:0015421]; peptide-transporting ATPase activity [GO:0015440]; protein homodimerization activity [GO:0042803]; substrate-specific transmembrane transporter activity [GO:0022891]                                                                                                                            |
| Q9H4B4 | ATP binding [GO:0005524]; p53 binding [GO:0002039]; protein serine/threonine kinase activity [GO:0004674]                                                                                                                                                                                                                                                                          |
| Q9UBS0 | ATP binding [GO:0005524]; peptide binding [GO:0042277]; protein kinase activity [GO:0004672]; protein serine/threonine kinase activity [GO:0004674]; ribosomal protein S6 kinase activity [GO:0004711]                                                                                                                                                                             |
| P23443 | ATP binding [GO:0005524]; peptide binding [GO:0042277]; protein kinase activity [GO:0004672]; protein serine/threonine/tyrosine kinase activity [GO:0004712]; ribosomal protein S6 kinase activity [GO:0004711]                                                                                                                                                                    |
| Q96S38 | ATP binding [GO:0005524]; phosphatidylinositol binding [GO:0035091]; protein serine/threonine kinase activity [GO:0004674]                                                                                                                                                                                                                                                         |
| P15735 | ATP binding [GO:0005524]; phosphorylase kinase activity [GO:0004689]; protein serine/threonine kinase activity [GO:0004674]; tau-protein kinase activity [GO:0050321]                                                                                                                                                                                                              |
| Q16816 | ATP binding [GO:0005524]; phosphorylase kinase activity [GO:0004689]; tau-protein kinase activity [GO:0050321]                                                                                                                                                                                                                                                                     |
| Q9Y2Z4 | ATP binding [GO:0005524]; poly(A) RNA binding [GO:0044822]; protein homodimerization activity [GO:0042803]; tRNA binding [GO:0000049]; tyrosine binding [GO:0072545]; tyrosine-tRNA ligase activity [GO:0004831]                                                                                                                                                                   |
| P42285 | ATP binding [GO:0005524]; poly(A) RNA binding [GO:0044822]; RNA helicase activity [GO:0003724]                                                                                                                                                                                                                                                                                     |
| O00442 | ATP binding [GO:0005524]; poly(A) RNA binding [GO:0044822]; RNA-3'-phosphate cyclase activity [GO:0003963]; RNA binding [GO:0003723]                                                                                                                                                                                                                                               |
| Q9NP81 | ATP binding [GO:0005524]; poly(A) RNA binding [GO:0044822]; serine-tRNA ligase activity [GO:0004828]                                                                                                                                                                                                                                                                               |
| Q5SY16 | ATP binding [GO:0005524]; polynucleotide 5'-hydroxyl-kinase activity [GO:0051731]; RNA binding [GO:0003723]                                                                                                                                                                                                                                                                        |
| Q7L3T8 | ATP binding [GO:0005524]; proline-tRNA ligase activity [GO:0004827]                                                                                                                                                                                                                                                                                                                |
| O75385 | ATP binding [GO:0005524]; protein complex binding [GO:0032403]; protein serine/threonine kinase activity [GO:0004674]; Rab GTPase binding [GO:0017137]                                                                                                                                                                                                                             |
| P26639 | ATP binding [GO:0005524]; protein homodimerization activity [GO:0042803]; threonine-tRNA ligase activity [GO:0004829]                                                                                                                                                                                                                                                              |
| P49840 | ATP binding [GO:0005524]; protein kinase A catalytic subunit binding [GO:0034236]; protein                                                                                                                                                                                                                                                                                         |

|        |                                                                                                                                                                                                                                                                                                                                                                           |
|--------|---------------------------------------------------------------------------------------------------------------------------------------------------------------------------------------------------------------------------------------------------------------------------------------------------------------------------------------------------------------------------|
|        | serine/threonine kinase activity [GO:0004674]; tau-protein kinase activity [GO:0050321]                                                                                                                                                                                                                                                                                   |
| Q8NCB2 | ATP binding [GO:0005524]; protein kinase activity [GO:0004672]                                                                                                                                                                                                                                                                                                            |
| Q6P5Z2 | ATP binding [GO:0005524]; protein kinase activity [GO:0004672]; protein kinase C activity [GO:0004697]                                                                                                                                                                                                                                                                    |
| O94768 | ATP binding [GO:0005524]; protein kinase activity [GO:0004672]; protein serine/threonine kinase activity [GO:0004674]                                                                                                                                                                                                                                                     |
| Q8N4C8 | ATP binding [GO:0005524]; protein kinase activity [GO:0004672]; protein serine/threonine kinase activity [GO:0004674]                                                                                                                                                                                                                                                     |
| Q9UKE5 | ATP binding [GO:0005524]; protein kinase activity [GO:0004672]; protein serine/threonine kinase activity [GO:0004674]                                                                                                                                                                                                                                                     |
| Q9Y243 | ATP binding [GO:0005524]; protein kinase activity [GO:0004672]; protein serine/threonine kinase activity [GO:0004674]                                                                                                                                                                                                                                                     |
| Q9Y4K4 | ATP binding [GO:0005524]; protein kinase activity [GO:0004672]; protein serine/threonine kinase activity [GO:0004674]                                                                                                                                                                                                                                                     |
| O96013 | ATP binding [GO:0005524]; protein kinase activity [GO:0004672]; protein serine/threonine kinase activity [GO:0004674]; Rac GTPase binding [GO:0048365]                                                                                                                                                                                                                    |
| O15075 | ATP binding [GO:0005524]; protein kinase activity [GO:0004672]; protein serine/threonine kinase activity [GO:0004674]; receptor signaling protein activity [GO:0005057]                                                                                                                                                                                                   |
| Q9H2X6 | ATP binding [GO:0005524]; protein kinase activity [GO:0004672]; protein serine/threonine kinase activity [GO:0004674]; RNA polymerase II activating transcription factor binding [GO:0001102]; RNA polymerase II transcription coactivator activity [GO:0001105]; SMAD binding [GO:0046332]; transcription corepressor activity [GO:0003714]; virion binding [GO:0046790] |
| Q9Y463 | ATP binding [GO:0005524]; protein kinase activity [GO:0004672]; protein serine/threonine/tyrosine kinase activity [GO:0004712]; protein serine/threonine kinase activity [GO:0004674]; protein tyrosine kinase activity [GO:0004713]; transcription coactivator activity [GO:0003713]                                                                                     |
| P19784 | ATP binding [GO:0005524]; protein N-terminus binding [GO:0047485]; protein serine/threonine kinase activity [GO:0004674]                                                                                                                                                                                                                                                  |
| O00444 | ATP binding [GO:0005524]; protein serine/threonine kinase activity [GO:0004674]                                                                                                                                                                                                                                                                                           |
| O14730 | ATP binding [GO:0005524]; protein serine/threonine kinase activity [GO:0004674]                                                                                                                                                                                                                                                                                           |
| O43930 | ATP binding [GO:0005524]; protein serine/threonine kinase activity [GO:0004674]                                                                                                                                                                                                                                                                                           |
| P11801 | ATP binding [GO:0005524]; protein serine/threonine kinase activity [GO:0004674]                                                                                                                                                                                                                                                                                           |
| P27448 | ATP binding [GO:0005524]; protein serine/threonine kinase activity [GO:0004674]                                                                                                                                                                                                                                                                                           |
| P31751 | ATP binding [GO:0005524]; protein serine/threonine kinase activity [GO:0004674]                                                                                                                                                                                                                                                                                           |
| P57058 | ATP binding [GO:0005524]; protein serine/threonine kinase activity [GO:0004674]                                                                                                                                                                                                                                                                                           |
| P57078 | ATP binding [GO:0005524]; protein serine/threonine kinase activity [GO:0004674]                                                                                                                                                                                                                                                                                           |
| Q15772 | ATP binding [GO:0005524]; protein serine/threonine kinase activity [GO:0004674]                                                                                                                                                                                                                                                                                           |
| Q52WX2 | ATP binding [GO:0005524]; protein serine/threonine kinase activity [GO:0004674]                                                                                                                                                                                                                                                                                           |
| Q6A1A2 | ATP binding [GO:0005524]; protein serine/threonine kinase activity [GO:0004674]                                                                                                                                                                                                                                                                                           |
| Q6PHR2 | ATP binding [GO:0005524]; protein serine/threonine kinase activity [GO:0004674]                                                                                                                                                                                                                                                                                           |
| Q7Z2Y5 | ATP binding [GO:0005524]; protein serine/threonine kinase activity [GO:0004674]                                                                                                                                                                                                                                                                                           |
| Q7Z695 | ATP binding [GO:0005524]; protein serine/threonine kinase activity [GO:0004674]                                                                                                                                                                                                                                                                                           |
| Q86TW2 | ATP binding [GO:0005524]; protein serine/threonine kinase activity [GO:0004674]                                                                                                                                                                                                                                                                                           |
| Q86UE8 | ATP binding [GO:0005524]; protein serine/threonine kinase activity [GO:0004674]                                                                                                                                                                                                                                                                                           |
| Q86V86 | ATP binding [GO:0005524]; protein serine/threonine kinase activity [GO:0004674]                                                                                                                                                                                                                                                                                           |
| Q86YV6 | ATP binding [GO:0005524]; protein serine/threonine kinase activity [GO:0004674]                                                                                                                                                                                                                                                                                           |
| Q86Z02 | ATP binding [GO:0005524]; protein serine/threonine kinase activity [GO:0004674]                                                                                                                                                                                                                                                                                           |
| Q8IYT8 | ATP binding [GO:0005524]; protein serine/threonine kinase activity [GO:0004674]                                                                                                                                                                                                                                                                                           |
| Q8N568 | ATP binding [GO:0005524]; protein serine/threonine kinase activity [GO:0004674]                                                                                                                                                                                                                                                                                           |
| Q8NEV1 | ATP binding [GO:0005524]; protein serine/threonine kinase activity [GO:0004674]                                                                                                                                                                                                                                                                                           |
| Q8NFD2 | ATP binding [GO:0005524]; protein serine/threonine kinase activity [GO:0004674]                                                                                                                                                                                                                                                                                           |
| Q96C45 | ATP binding [GO:0005524]; protein serine/threonine kinase activity [GO:0004674]                                                                                                                                                                                                                                                                                           |

|        |                                                                                                                                                                                                                                                                                                                                                                                                                                                                                                                                                                                                                                                                      |
|--------|----------------------------------------------------------------------------------------------------------------------------------------------------------------------------------------------------------------------------------------------------------------------------------------------------------------------------------------------------------------------------------------------------------------------------------------------------------------------------------------------------------------------------------------------------------------------------------------------------------------------------------------------------------------------|
| Q96LW2 | ATP binding [GO:0005524]; protein serine/threonine kinase activity [GO:0004674]                                                                                                                                                                                                                                                                                                                                                                                                                                                                                                                                                                                      |
| Q96QS6 | ATP binding [GO:0005524]; protein serine/threonine kinase activity [GO:0004674]                                                                                                                                                                                                                                                                                                                                                                                                                                                                                                                                                                                      |
| Q9BRS2 | ATP binding [GO:0005524]; protein serine/threonine kinase activity [GO:0004674]                                                                                                                                                                                                                                                                                                                                                                                                                                                                                                                                                                                      |
| Q9BVS4 | ATP binding [GO:0005524]; protein serine/threonine kinase activity [GO:0004674]                                                                                                                                                                                                                                                                                                                                                                                                                                                                                                                                                                                      |
| Q9BYT3 | ATP binding [GO:0005524]; protein serine/threonine kinase activity [GO:0004674]                                                                                                                                                                                                                                                                                                                                                                                                                                                                                                                                                                                      |
| Q9C098 | ATP binding [GO:0005524]; protein serine/threonine kinase activity [GO:0004674]                                                                                                                                                                                                                                                                                                                                                                                                                                                                                                                                                                                      |
| Q9P1W9 | ATP binding [GO:0005524]; protein serine/threonine kinase activity [GO:0004674]                                                                                                                                                                                                                                                                                                                                                                                                                                                                                                                                                                                      |
| Q9UEE5 | ATP binding [GO:0005524]; protein serine/threonine kinase activity [GO:0004674]                                                                                                                                                                                                                                                                                                                                                                                                                                                                                                                                                                                      |
| Q9UKI8 | ATP binding [GO:0005524]; protein serine/threonine kinase activity [GO:0004674]                                                                                                                                                                                                                                                                                                                                                                                                                                                                                                                                                                                      |
| Q9Y3S1 | ATP binding [GO:0005524]; protein serine/threonine kinase activity [GO:0004674]                                                                                                                                                                                                                                                                                                                                                                                                                                                                                                                                                                                      |
| Q9Y6S9 | ATP binding [GO:0005524]; protein serine/threonine kinase activity [GO:0004674]                                                                                                                                                                                                                                                                                                                                                                                                                                                                                                                                                                                      |
| Q9NQU5 | ATP binding [GO:0005524]; protein serine/threonine kinase activity [GO:0004674]; Rac GTPase binding [GO:0048365]                                                                                                                                                                                                                                                                                                                                                                                                                                                                                                                                                     |
| Q9P286 | ATP binding [GO:0005524]; protein serine/threonine kinase activity [GO:0004674]; Rac GTPase binding [GO:0048365]                                                                                                                                                                                                                                                                                                                                                                                                                                                                                                                                                     |
| Q9UEW8 | ATP binding [GO:0005524]; protein serine/threonine kinase activity [GO:0004674]; receptor signaling protein serine/threonine kinase activity [GO:0004702]                                                                                                                                                                                                                                                                                                                                                                                                                                                                                                            |
| Q9NYY3 | ATP binding [GO:0005524]; protein serine/threonine kinase activity [GO:0004674]; signal transducer activity [GO:0004871]                                                                                                                                                                                                                                                                                                                                                                                                                                                                                                                                             |
| Q99973 | ATP binding [GO:0005524]; RNA binding [GO:0003723]                                                                                                                                                                                                                                                                                                                                                                                                                                                                                                                                                                                                                   |
| P49591 | ATP binding [GO:0005524]; RNA binding [GO:0003723]; serine-tRNA ligase activity [GO:0004828]                                                                                                                                                                                                                                                                                                                                                                                                                                                                                                                                                                         |
| O75648 | ATP binding [GO:0005524]; sulfurtransferase activity [GO:0016783]; tRNA (5-methylaminomethyl-2-thiouridylate)-methyltransferase activity [GO:0004808]; tRNA binding [GO:0000049]                                                                                                                                                                                                                                                                                                                                                                                                                                                                                     |
| A2RTX5 | ATP binding [GO:0005524]; threonine-tRNA ligase activity [GO:0004829]                                                                                                                                                                                                                                                                                                                                                                                                                                                                                                                                                                                                |
| Q9BW92 | ATP binding [GO:0005524]; threonine-tRNA ligase activity [GO:0004829]                                                                                                                                                                                                                                                                                                                                                                                                                                                                                                                                                                                                |
| P23381 | ATP binding [GO:0005524]; tryptophan-tRNA ligase activity [GO:0004830]                                                                                                                                                                                                                                                                                                                                                                                                                                                                                                                                                                                               |
| Q9UGM6 | ATP binding [GO:0005524]; tryptophan-tRNA ligase activity [GO:0004830]                                                                                                                                                                                                                                                                                                                                                                                                                                                                                                                                                                                               |
| Q17RB8 | ATP-dependent peptidase activity [GO:0004176]; zinc ion binding [GO:0008270]                                                                                                                                                                                                                                                                                                                                                                                                                                                                                                                                                                                         |
| Q96Q11 | ATP:3'-cytidine-cytidine-tRNA adenylyltransferase activity [GO:0052929]; ATP binding [GO:0005524]; CTP:3'-cytidine-tRNA cytidylyltransferase activity [GO:0052928]; CTP:tRNA cytidylyltransferase activity [GO:0052927]; tRNA adenylyltransferase activity [GO:0004810]; tRNA binding [GO:0000049]                                                                                                                                                                                                                                                                                                                                                                   |
| Q9NUQ8 | ATPase activity [GO:0016887]; ATP binding [GO:0005524]                                                                                                                                                                                                                                                                                                                                                                                                                                                                                                                                                                                                               |
| O00571 | ATPase activity [GO:0016887]; ATP binding [GO:0005524]; ATP-dependent DNA helicase activity [GO:0004003]; ATP-dependent RNA helicase activity [GO:0004004]; CTPase activity [GO:0043273]; DNA binding [GO:0003677]; eukaryotic initiation factor 4E binding [GO:0008190]; GTPase activity [GO:0003924]; mRNA 5'-UTR binding [GO:0048027]; nucleoside-triphosphatase activity [GO:0017111]; poly(A) binding [GO:0008143]; poly(A) RNA binding [GO:0044822]; ribosomal small subunit binding [GO:0043024]; RNA binding [GO:0003723]; RNA stem-loop binding [GO:0035613]; transcription factor binding [GO:0008134]; translation initiation factor binding [GO:0031369] |
| Q14240 | ATPase activity [GO:0016887]; ATP binding [GO:0005524]; ATP-dependent RNA helicase activity [GO:0004004]; helicase activity [GO:0004386]; poly(A) RNA binding [GO:0044822]; translation initiation factor activity [GO:0003743]                                                                                                                                                                                                                                                                                                                                                                                                                                      |
| Q9NTK5 | ATPase activity [GO:0016887]; ATP binding [GO:0005524]; GTP binding [GO:0005525]; metal ion binding [GO:0046872]; ribosomal large subunit binding [GO:0043023]; ribosome binding [GO:0043022]                                                                                                                                                                                                                                                                                                                                                                                                                                                                        |
| P61221 | ATPase activity [GO:0016887]; ATP binding [GO:0005524]; iron-sulfur cluster binding [GO:0051536]; ribonuclease inhibitor activity [GO:0008428]                                                                                                                                                                                                                                                                                                                                                                                                                                                                                                                       |
| O75037 | ATPase activity [GO:0016887]; ATP binding [GO:0005524]; microtubule motor activity [GO:0003777]                                                                                                                                                                                                                                                                                                                                                                                                                                                                                                                                                                      |
| Q7Z4S6 | ATPase activity [GO:0016887]; ATP binding [GO:0005524]; microtubule motor activity [GO:0003777]                                                                                                                                                                                                                                                                                                                                                                                                                                                                                                                                                                      |
| Q8NE71 | ATPase activity [GO:0016887]; ATP binding [GO:0005524]; poly(A) RNA binding [GO:0044822]; ribosome binding [GO:0043022]; translation activator activity [GO:0008494]; translation factor activity, RNA binding [GO:0008135]                                                                                                                                                                                                                                                                                                                                                                                                                                          |
| Q9UG63 | ATPase activity [GO:0016887]; ATP binding [GO:0005524]; transporter activity [GO:0005215]                                                                                                                                                                                                                                                                                                                                                                                                                                                                                                                                                                            |

|        |                                                                                                                                                                                                                                                                                                                       |
|--------|-----------------------------------------------------------------------------------------------------------------------------------------------------------------------------------------------------------------------------------------------------------------------------------------------------------------------|
| P28288 | ATPase activity [GO:0016887]; ATPase activity, coupled to transmembrane movement of substances [GO:0042626]; ATP binding [GO:0005524]; long-chain fatty acid transporter activity [GO:0005324]; protein homodimerization activity [GO:0042803]                                                                        |
| Q9BZC7 | ATPase activity [GO:0016887]; ATPase activity, coupled to transmembrane movement of substances [GO:0042626]; ATP binding [GO:0005524]; nucleotide binding [GO:0000166]                                                                                                                                                |
| P33527 | ATPase activity [GO:0016887]; ATPase activity, coupled to transmembrane movement of substances [GO:0042626]; ATP binding [GO:0005524]; transporter activity [GO:0005215]                                                                                                                                              |
| O94911 | ATPase activity, coupled to transmembrane movement of substances [GO:0042626]; ATP binding [GO:0005524]                                                                                                                                                                                                               |
| Q8IUA7 | ATPase activity, coupled to transmembrane movement of substances [GO:0042626]; ATP binding [GO:0005524]                                                                                                                                                                                                               |
| Q8N139 | ATPase activity, coupled to transmembrane movement of substances [GO:0042626]; ATP binding [GO:0005524]                                                                                                                                                                                                               |
| Q8WWZ4 | ATPase activity, coupled to transmembrane movement of substances [GO:0042626]; ATP binding [GO:0005524]                                                                                                                                                                                                               |
| Q8WWZ7 | ATPase activity, coupled to transmembrane movement of substances [GO:0042626]; ATP binding [GO:0005524]                                                                                                                                                                                                               |
| Q96J65 | ATPase activity, coupled to transmembrane movement of substances [GO:0042626]; ATP binding [GO:0005524]                                                                                                                                                                                                               |
| Q86UQ4 | ATPase activity, coupled to transmembrane movement of substances [GO:0042626]; ATP binding [GO:0005524]; cholesterol transporter activity [GO:0017127]; phospholipid transporter activity [GO:0005548]                                                                                                                |
| P78363 | ATPase activity, coupled to transmembrane movement of substances [GO:0042626]; ATP binding [GO:0005524]; cholesterol transporter activity [GO:0017127]; phospholipid-translocating ATPase activity [GO:0004012]; phospholipid transporter activity [GO:0005548]; transporter activity [GO:0005215]                    |
| Q2M3G0 | ATPase activity, coupled to transmembrane movement of substances [GO:0042626]; ATP binding [GO:0005524]; efflux transmembrane transporter activity [GO:0015562]                                                                                                                                                       |
| O60706 | ATPase activity, coupled to transmembrane movement of substances [GO:0042626]; ATP binding [GO:0005524]; ion channel binding [GO:0044325]; potassium channel activity [GO:0005267]; potassium channel regulator activity [GO:0015459]; sulfonylurea receptor activity [GO:0008281]; transporter activity [GO:0005215] |
| Q09428 | ATPase activity, coupled to transmembrane movement of substances [GO:0042626]; ATP binding [GO:0005524]; ion channel binding [GO:0044325]; potassium channel activity [GO:0005267]; potassium ion transmembrane transporter activity [GO:0015079]; sulfonylurea receptor activity [GO:0008281]                        |
| O15438 | ATPase activity, coupled to transmembrane movement of substances [GO:0042626]; ATP binding [GO:0005524]; organic anion transmembrane transporter activity [GO:0008514]                                                                                                                                                |
| O15440 | ATPase activity, coupled to transmembrane movement of substances [GO:0042626]; ATP binding [GO:0005524]; organic anion transmembrane transporter activity [GO:0008514]                                                                                                                                                |
| Q92887 | ATPase activity, coupled to transmembrane movement of substances [GO:0042626]; ATP binding [GO:0005524]; organic anion transmembrane transporter activity [GO:0008514]                                                                                                                                                |
| Q96J66 | ATPase activity, coupled to transmembrane movement of substances [GO:0042626]; ATP binding [GO:0005524]; organic anion transmembrane transporter activity [GO:0008514]; purine nucleotide transmembrane transporter activity [GO:0015216]                                                                             |
| P21439 | ATPase activity, coupled to transmembrane movement of substances [GO:0042626]; ATP binding [GO:0005524]; phosphatidylcholine-translocating ATPase activity [GO:0090554]; phosphatidylcholine transporter activity [GO:0008525]; xenobiotic-transporting ATPase activity [GO:0008559]                                  |
| O95255 | ATPase activity, coupled to transmembrane movement of substances [GO:0042626]; ATP binding [GO:0005524]; transporter activity [GO:0005215]                                                                                                                                                                            |
| Q99758 | ATPase activity, coupled to transmembrane movement of substances [GO:0042626]; ATP binding [GO:0005524]; transporter activity [GO:0005215]                                                                                                                                                                            |
| Q9NRK6 | ATPase activity, coupled to transmembrane movement of substances [GO:0042626]; ATP binding [GO:0005524]; transporter activity [GO:0005215]                                                                                                                                                                            |
| P08183 | ATPase activity, coupled to transmembrane movement of substances [GO:0042626]; ATP binding [GO:0005524]; transporter activity [GO:0005215]; xenobiotic-transporting ATPase activity [GO:0008559]                                                                                                                      |
| Q8IWQ3 | ATPase binding [GO:0051117]; ATPase regulator activity [GO:0060590]; ATP binding [GO:0005524]; magnesium ion binding [GO:0000287]; protein serine/threonine kinase activity [GO:0004674]; tau-protein kinase activity [GO:0050321]                                                                                    |

|        |                                                                                                                                                                                                                                                                                                                                                                                                                                                                                          |
|--------|------------------------------------------------------------------------------------------------------------------------------------------------------------------------------------------------------------------------------------------------------------------------------------------------------------------------------------------------------------------------------------------------------------------------------------------------------------------------------------------|
| Q86TM6 | ATPase binding [GO:0051117]; chaperone binding [GO:0051087]; ligase activity [GO:0016874]; ubiquitin protein ligase activity [GO:0061630]; ubiquitin protein ligase activity involved in ERAD pathway [GO:1904264]; ubiquitin-specific protease binding [GO:1990381]; unfolded protein binding [GO:0051082]; zinc ion binding [GO:0008270]                                                                                                                                               |
| P16157 | ATPase binding [GO:0051117]; cytoskeletal adaptor activity [GO:0008093]; enzyme binding [GO:0019899]; spectrin binding [GO:0030507]; structural constituent of cytoskeleton [GO:0005200]; structural molecule activity [GO:0005198]                                                                                                                                                                                                                                                      |
| Q01484 | ATPase binding [GO:0051117]; enzyme binding [GO:0019899]; ion channel binding [GO:0044325]; potassium channel regulator activity [GO:0015459]; protein binding, bridging [GO:0030674]; protein kinase binding [GO:0019901]; spectrin binding [GO:0030507]                                                                                                                                                                                                                                |
| Q96B26 | AU-rich element binding [GO:0017091]                                                                                                                                                                                                                                                                                                                                                                                                                                                     |
| P41238 | AU-rich element binding [GO:0017091]; cytidine deaminase activity [GO:0004126]; cytosine deaminase activity [GO:0004131]; RNA binding [GO:0003723]; zinc ion binding [GO:0008270]                                                                                                                                                                                                                                                                                                        |
| P47974 | AU-rich element binding [GO:0017091]; DNA binding [GO:0003677]; metal ion binding [GO:0046872]; mRNA 3'-UTR AU-rich region binding [GO:0035925]; poly(A) RNA binding [GO:0044822]; transcription factor activity, sequence-specific DNA binding [GO:0003700]                                                                                                                                                                                                                             |
| Q07352 | AU-rich element binding [GO:0017091]; DNA binding [GO:0003677]; metal ion binding [GO:0046872]; mRNA binding [GO:0003729]; poly(A) RNA binding [GO:0044822]; transcription factor activity, sequence-specific DNA binding [GO:0003700]                                                                                                                                                                                                                                                   |
| Q15717 | AU-rich element binding [GO:0017091]; double-stranded RNA binding [GO:0003725]; mRNA 3'-UTR AU-rich region binding [GO:0035925]; mRNA 3'-UTR binding [GO:0003730]; mRNA binding [GO:0003729]; nucleotide binding [GO:0000166]; poly(A) RNA binding [GO:0044822]; protein kinase binding [GO:0019901]; RNA binding [GO:0003723]                                                                                                                                                           |
| O43809 | AU-rich element binding [GO:0017091]; histone deacetylase binding [GO:0042826]; hydrolase activity [GO:0016787]; mRNA binding [GO:0003729]; poly(A) RNA binding [GO:0044822]; protein homodimerization activity [GO:0042803]                                                                                                                                                                                                                                                             |
| P26378 | AU-rich element binding [GO:0017091]; mRNA 3'-UTR binding [GO:0003730]; nucleotide binding [GO:0000166]; RNA binding [GO:0003723]                                                                                                                                                                                                                                                                                                                                                        |
| Q14576 | AU-rich element binding [GO:0017091]; nucleotide binding [GO:0000166]                                                                                                                                                                                                                                                                                                                                                                                                                    |
| Q8IYX4 | AU-rich element binding [GO:0017091]; nucleotide binding [GO:0000166]                                                                                                                                                                                                                                                                                                                                                                                                                    |
| P31483 | AU-rich element binding [GO:0017091]; nucleotide binding [GO:0000166]; poly(A) binding [GO:0008143]; poly(A) RNA binding [GO:0044822]                                                                                                                                                                                                                                                                                                                                                    |
| Q13151 | AU-rich element binding [GO:0017091]; nucleotide binding [GO:0000166]; poly(A) RNA binding [GO:0044822]; protein kinase binding [GO:0019901]; RNA binding [GO:0003723]                                                                                                                                                                                                                                                                                                                   |
| Q01085 | AU-rich element binding [GO:0017091]; nucleotide binding [GO:0000166]; poly(A) RNA binding [GO:0044822]; RNA binding [GO:0003723]                                                                                                                                                                                                                                                                                                                                                        |
| Q86XN8 | AU-rich element binding [GO:0017091]; poly(A) RNA binding [GO:0044822]; zinc ion binding [GO:0008270]                                                                                                                                                                                                                                                                                                                                                                                    |
| Q9UKV5 | BAT3 complex binding [GO:1904288]; chaperone binding [GO:0051087]; ligase activity [GO:0016874]; protein binding, bridging [GO:0030674]; receptor activity [GO:0004872]; ubiquitin protein ligase activity [GO:0061630]; ubiquitin protein ligase activity involved in ERAD pathway [GO:1904264]; ubiquitin-protein transferase activity [GO:0004842]; ubiquitin-specific protease binding [GO:1990381]; ubiquitin-ubiquitin ligase activity [GO:0034450]; zinc ion binding [GO:0008270] |
| Q14678 | beta-catenin binding [GO:0008013]                                                                                                                                                                                                                                                                                                                                                                                                                                                        |
| Q9NSC2 | beta-catenin binding [GO:0008013]; chromatin binding [GO:0003682]; DNA binding [GO:0003677]; metal ion binding [GO:0046872]; RNA polymerase II core promoter proximal region sequence-specific DNA binding [GO:0000978]; transcriptional repressor activity, RNA polymerase II core promoter proximal region sequence-specific binding [GO:0001078]; transcription factor activity, sequence-specific DNA binding [GO:0003700]                                                           |
| O60907 | beta-catenin binding [GO:0008013]; histone binding [GO:0042393]; protein C-terminus binding [GO:0008022]; protein domain specific binding [GO:0019904]; transcription corepressor activity [GO:0003714]; transcription factor binding [GO:0008134]; transcription regulatory region DNA binding [GO:0044212]                                                                                                                                                                             |
| Q9BZK7 | beta-catenin binding [GO:0008013]; histone binding [GO:0042393]; protein N-terminus binding [GO:0047485]; transcription corepressor activity [GO:0003714]; transcription regulatory region DNA binding [GO:0044212]                                                                                                                                                                                                                                                                      |
| P42704 | beta-tubulin binding [GO:0048487]; microtubule binding [GO:0008017]; poly(A) RNA binding [GO:0044822]; RNA binding [GO:0003723]; single-stranded DNA binding [GO:0003697]; ubiquitin                                                                                                                                                                                                                                                                                                     |

|        |                                                                                                                                                                                                                                                                                                                                                                                                                                       |
|--------|---------------------------------------------------------------------------------------------------------------------------------------------------------------------------------------------------------------------------------------------------------------------------------------------------------------------------------------------------------------------------------------------------------------------------------------|
|        | protein ligase binding [GO:0031625]                                                                                                                                                                                                                                                                                                                                                                                                   |
| P55769 | box C/D snoRNA binding [GO:0034512]; poly(A) RNA binding [GO:0044822]; RNA binding [GO:0003723]; U3 snoRNA binding [GO:0034511]; U4 snRNA binding [GO:0030621]                                                                                                                                                                                                                                                                        |
| Q92879 | BRE binding [GO:0042835]; mRNA binding [GO:0003729]; nucleotide binding [GO:0000166]; poly(A) RNA binding [GO:0044822]; RNA binding [GO:0003723]; translation repressor activity, nucleic acid binding [GO:0000900]                                                                                                                                                                                                                   |
| Q9BZC1 | BRE binding [GO:0042835]; mRNA binding [GO:0003729]; nucleotide binding [GO:0000166]; translation repressor activity, nucleic acid binding [GO:0000900]                                                                                                                                                                                                                                                                               |
| Q96KQ7 | C2H2 zinc finger domain binding [GO:0070742]; histone-lysine N-methyltransferase activity [GO:0018024]; histone methyltransferase activity (H3-K27 specific) [GO:0046976]; histone methyltransferase activity (H3-K9 specific) [GO:0046974]; p53 binding [GO:0002039]; protein-lysine N-methyltransferase activity [GO:0016279]; zinc ion binding [GO:0008270]                                                                        |
| Q2QGD7 | C2H2 zinc finger domain binding [GO:0070742]; LRR domain binding [GO:0030275]; metal ion binding [GO:0046872]; nucleic acid binding [GO:0003676]; transcription factor activity, sequence-specific DNA binding [GO:0003700]                                                                                                                                                                                                           |
| P98168 | C2H2 zinc finger domain binding [GO:0070742]; metal ion binding [GO:0046872]; nucleic acid binding [GO:0003676]; transcription factor activity, sequence-specific DNA binding [GO:0003700]                                                                                                                                                                                                                                            |
| Q12955 | cadherin binding [GO:0045296]; cytoskeletal protein binding [GO:0008092]; ion channel binding [GO:0044325]; protein binding, bridging [GO:0030674]; spectrin binding [GO:0030507]; structural constituent of cytoskeleton [GO:0005200]                                                                                                                                                                                                |
| O75575 | calcitonin gene-related peptide receptor activity [GO:0001635]; DNA-directed RNA polymerase activity [GO:0003899]; nucleotide binding [GO:0000166]                                                                                                                                                                                                                                                                                    |
| P62879 | calcium channel regulator activity [GO:0005246]; GTPase activity [GO:0003924]; GTPase binding [GO:0051020]; protein complex binding [GO:0032403]; signal transducer activity [GO:0004871]                                                                                                                                                                                                                                             |
| Q9BXN1 | calcium ion binding [GO:0005509]                                                                                                                                                                                                                                                                                                                                                                                                      |
| Q9NU02 | calcium ion binding [GO:0005509]                                                                                                                                                                                                                                                                                                                                                                                                      |
| Q9UM47 | calcium ion binding [GO:0005509]                                                                                                                                                                                                                                                                                                                                                                                                      |
| O94813 | calcium ion binding [GO:0005509]; chemorepellent activity [GO:0045499]; GTPase inhibitor activity [GO:0005095]; heparin binding [GO:0008201]; identical protein binding [GO:0042802]; laminin-1 binding [GO:0043237]; protein homodimerization activity [GO:0042803]; proteoglycan binding [GO:0043394]; Roundabout binding [GO:0048495]                                                                                              |
| P46531 | calcium ion binding [GO:0005509]; chromatin DNA binding [GO:0031490]; core promoter binding [GO:0001047]; enzyme binding [GO:0019899]; enzyme inhibitor activity [GO:0004857]; receptor activity [GO:0004872]; sequence-specific DNA binding [GO:0043565]; transcriptional activator activity, RNA polymerase II transcription factor binding [GO:0001190]; transcription factor activity, sequence-specific DNA binding [GO:0003700] |
| P00740 | calcium ion binding [GO:0005509]; endopeptidase activity [GO:0004175]; serine-type endopeptidase activity [GO:0004252]                                                                                                                                                                                                                                                                                                                |
| P08709 | calcium ion binding [GO:0005509]; glycoprotein binding [GO:0001948]; serine-type endopeptidase activity [GO:0004252]; serine-type peptidase activity [GO:0008236]                                                                                                                                                                                                                                                                     |
| P00734 | calcium ion binding [GO:0005509]; growth factor activity [GO:0008083]; receptor binding [GO:0005102]; serine-type endopeptidase activity [GO:0004252]; thrombospondin receptor activity [GO:0070053]                                                                                                                                                                                                                                  |
| P19338 | calcium ion binding [GO:0005509]; identical protein binding [GO:0042802]; nucleotide binding [GO:0000166]; poly(A) RNA binding [GO:0044822]; protein C-terminus binding [GO:0008022]; RNA binding [GO:0003723]; rRNA primary transcript binding [GO:0042134]; selenocysteine insertion sequence binding [GO:0035368]; single-stranded DNA binding [GO:0003697]; telomeric DNA binding [GO:0042162]                                    |
| P09871 | calcium ion binding [GO:0005509]; identical protein binding [GO:0042802]; serine-type endopeptidase activity [GO:0004252]                                                                                                                                                                                                                                                                                                             |
| P00709 | calcium ion binding [GO:0005509]; lactose synthase activity [GO:0004461]                                                                                                                                                                                                                                                                                                                                                              |
| O00423 | calcium ion binding [GO:0005509]; microtubule binding [GO:0008017]; tubulin binding [GO:0015631]                                                                                                                                                                                                                                                                                                                                      |
| P00742 | calcium ion binding [GO:0005509]; phospholipid binding [GO:0005543]; serine-type endopeptidase activity [GO:0004252]                                                                                                                                                                                                                                                                                                                  |
| Q6ZN04 | calcium ion binding [GO:0005509]; poly(A) RNA binding [GO:0044822]; zinc ion binding [GO:0008270]                                                                                                                                                                                                                                                                                                                                     |
| Q04721 | calcium ion binding [GO:0005509]; receptor activity [GO:0004872]; transcription factor activity, ligand-                                                                                                                                                                                                                                                                                                                              |

|        |                                                                                                                                                                                                                                                                                                                                                                                                                                                                                                                               |
|--------|-------------------------------------------------------------------------------------------------------------------------------------------------------------------------------------------------------------------------------------------------------------------------------------------------------------------------------------------------------------------------------------------------------------------------------------------------------------------------------------------------------------------------------|
|        | activated RNA polymerase II transcription factor binding [GO:0038049]                                                                                                                                                                                                                                                                                                                                                                                                                                                         |
| O75093 | calcium ion binding [GO:0005509]; Roundabout binding [GO:0048495]                                                                                                                                                                                                                                                                                                                                                                                                                                                             |
| O75094 | calcium ion binding [GO:0005509]; Roundabout binding [GO:0048495]                                                                                                                                                                                                                                                                                                                                                                                                                                                             |
| P04070 | calcium ion binding [GO:0005509]; serine-type endopeptidase activity [GO:0004252]                                                                                                                                                                                                                                                                                                                                                                                                                                             |
| P07478 | calcium ion binding [GO:0005509]; serine-type endopeptidase activity [GO:0004252]                                                                                                                                                                                                                                                                                                                                                                                                                                             |
| P00736 | calcium ion binding [GO:0005509]; serine-type endopeptidase activity [GO:0004252]; serine-type peptidase activity [GO:0008236]                                                                                                                                                                                                                                                                                                                                                                                                |
| P35030 | calcium ion binding [GO:0005509]; serine-type endopeptidase activity [GO:0004252]; serine-type peptidase activity [GO:0008236]                                                                                                                                                                                                                                                                                                                                                                                                |
| P05981 | calcium-activated potassium channel activity [GO:0015269]; peptidase activity [GO:0008233]; serine-type endopeptidase activity [GO:0004252]; serine-type exopeptidase activity [GO:0070008]; serine-type peptidase activity [GO:0008236]                                                                                                                                                                                                                                                                                      |
| O00187 | calcium-dependent protein binding [GO:0048306]; calcium ion binding [GO:0005509]; complement component C4b binding [GO:0001855]; peptidase activity [GO:0008233]; serine-type endopeptidase activity [GO:0004252]                                                                                                                                                                                                                                                                                                             |
| P48740 | calcium-dependent protein binding [GO:0048306]; calcium ion binding [GO:0005509]; peptidase activity [GO:0008233]; protein homodimerization activity [GO:0042803]; serine-type endopeptidase activity [GO:0004252]                                                                                                                                                                                                                                                                                                            |
| Q9NW64 | calcium-dependent protein binding [GO:0048306]; metal ion binding [GO:0046872]; nucleocytoplasmic transporter activity [GO:0005487]; nucleotide binding [GO:0000166]; poly(A) RNA binding [GO:0044822]; pre-mRNA binding [GO:0036002]; U6 snRNA binding [GO:0017070]                                                                                                                                                                                                                                                          |
| Q66K89 | cAMP response element binding [GO:0035497]; DNA binding [GO:0003677]; ligase activity [GO:0016874]; metal ion binding [GO:0046872]; RNA polymerase II regulatory region sequence-specific DNA binding [GO:0000977]; transcriptional repressor activity, RNA polymerase II transcription regulatory region sequence-specific binding [GO:0001227]; transcription coactivator activity [GO:0003713]; transcription corepressor activity [GO:0003714]; transcription factor activity, sequence-specific DNA binding [GO:0003700] |
| Q05BV3 | catalytic activity [GO:0003824]                                                                                                                                                                                                                                                                                                                                                                                                                                                                                               |
| Q2TBE0 | catalytic activity [GO:0003824]                                                                                                                                                                                                                                                                                                                                                                                                                                                                                               |
| Q69YN2 | catalytic activity [GO:0003824]                                                                                                                                                                                                                                                                                                                                                                                                                                                                                               |
| Q8N145 | catalytic activity [GO:0003824]                                                                                                                                                                                                                                                                                                                                                                                                                                                                                               |
| P35269 | catalytic activity [GO:0003824]; DNA binding [GO:0003677]; phosphatase activator activity [GO:0019211]; poly(A) RNA binding [GO:0044822]; transcription coactivator activity [GO:0003713]; transcription factor binding [GO:0008134]                                                                                                                                                                                                                                                                                          |
| Q9NY12 | cation channel activity [GO:0005261]; poly(A) RNA binding [GO:0044822]                                                                                                                                                                                                                                                                                                                                                                                                                                                        |
| O75762 | channel activity [GO:0015267]; intracellular ligand-gated calcium channel activity [GO:0005218]; temperature-gated cation channel activity [GO:0097604]                                                                                                                                                                                                                                                                                                                                                                       |
| O14775 | chaperone binding [GO:0051087]; G-protein gamma-subunit binding [GO:0031682]; GTPase activity [GO:0003924]; signal transducer activity [GO:0004871]                                                                                                                                                                                                                                                                                                                                                                           |
| P11441 | chaperone binding [GO:0051087]; ubiquitin-like protein transferase activity [GO:0019787]                                                                                                                                                                                                                                                                                                                                                                                                                                      |
| P14210 | chemoattractant activity [GO:0042056]; growth factor activity [GO:0008083]; identical protein binding [GO:0042802]                                                                                                                                                                                                                                                                                                                                                                                                            |
| O43155 | chemorepellent activity [GO:0045499]; protein binding, bridging [GO:0030674]; receptor signaling protein activity [GO:0005057]                                                                                                                                                                                                                                                                                                                                                                                                |
| Q9NZU0 | chemorepellent activity [GO:0045499]; protein binding, bridging [GO:0030674]; receptor signaling protein activity [GO:0005057]                                                                                                                                                                                                                                                                                                                                                                                                |
| Q12770 | cholesterol binding [GO:0015485]; unfolded protein binding [GO:0051082]                                                                                                                                                                                                                                                                                                                                                                                                                                                       |
| Q6UXN9 | chromatin binding [GO:0003682]                                                                                                                                                                                                                                                                                                                                                                                                                                                                                                |
| P41182 | chromatin binding [GO:0003682]; chromatin DNA binding [GO:0031490]; intronic transcription regulatory region sequence-specific DNA binding [GO:0001161]; metal ion binding [GO:0046872]; RNA polymerase II regulatory region sequence-specific DNA binding [GO:0000977]; sequence-specific DNA binding [GO:0043565]; transcriptional repressor activity, RNA polymerase II transcription regulatory region sequence-specific binding [GO:0001227]; transcription factor activity, sequence-specific DNA binding [GO:0003700]  |
| Q15424 | chromatin binding [GO:0003682]; core promoter binding [GO:0001047]; double-stranded DNA binding                                                                                                                                                                                                                                                                                                                                                                                                                               |

|        |                                                                                                                                                                                                                                                                                                                                                                                                                                                                                                                                          |
|--------|------------------------------------------------------------------------------------------------------------------------------------------------------------------------------------------------------------------------------------------------------------------------------------------------------------------------------------------------------------------------------------------------------------------------------------------------------------------------------------------------------------------------------------------|
|        | [GO:0003690]; nucleotide binding [GO:0000166]; poly(A) RNA binding [GO:0044822]                                                                                                                                                                                                                                                                                                                                                                                                                                                          |
| P23246 | chromatin binding [GO:0003682]; core promoter binding [GO:0001047]; histone deacetylase binding [GO:0042826]; nucleotide binding [GO:0000166]; poly(A) RNA binding [GO:0044822]; RNA polymerase II distal enhancer sequence-specific DNA binding [GO:0000980]; transcription regulatory region DNA binding [GO:0044212]; transcription regulatory region sequence-specific DNA binding [GO:0000976]                                                                                                                                      |
| Q15233 | chromatin binding [GO:0003682]; core promoter binding [GO:0001047]; identical protein binding [GO:0042802]; nucleotide binding [GO:0000166]; poly(A) RNA binding [GO:0044822]; RNA polymerase II distal enhancer sequence-specific DNA binding [GO:0000980]                                                                                                                                                                                                                                                                              |
| P38159 | chromatin binding [GO:0003682]; core promoter binding [GO:0001047]; mRNA binding [GO:0003729]; nucleotide binding [GO:0000166]; poly(A) RNA binding [GO:0044822]; RNA binding [GO:0003723]                                                                                                                                                                                                                                                                                                                                               |
| Q01201 | chromatin binding [GO:0003682]; core promoter binding [GO:0001047]; RNA polymerase II regulatory region sequence-specific DNA binding [GO:0000977]; RNA polymerase II transcription factor activity, sequence-specific DNA binding [GO:0000981]; transcription corepressor activity [GO:0003714]; transcription factor activity, sequence-specific DNA binding [GO:0003700]                                                                                                                                                              |
| Q8TF32 | chromatin binding [GO:0003682]; core promoter sequence-specific DNA binding [GO:0001046]; metal ion binding [GO:0046872]; RNA polymerase II core promoter proximal region sequence-specific DNA binding [GO:0000978]                                                                                                                                                                                                                                                                                                                     |
| Q7Z2E3 | chromatin binding [GO:0003682]; damaged DNA binding [GO:0003684]; DNA 5'-adenosine monophosphate hydrolase activity [GO:0033699]; double-stranded DNA binding [GO:0003690]; double-stranded RNA binding [GO:0003725]; metal ion binding [GO:0046872]; phosphoglycolate phosphatase activity [GO:0008967]; phosphoprotein binding [GO:0051219]; polynucleotide 3'-phosphatase activity [GO:0046403]; protein N-terminus binding [GO:0047485]                                                                                              |
| P27694 | chromatin binding [GO:0003682]; damaged DNA binding [GO:0003684]; metal ion binding [GO:0046872]; single-stranded DNA binding [GO:0003697]                                                                                                                                                                                                                                                                                                                                                                                               |
| O15054 | chromatin binding [GO:0003682]; dioxygenase activity [GO:0051213]; histone demethylase activity (H3-K27 specific) [GO:0071558]; metal ion binding [GO:0046872]; sequence-specific DNA binding [GO:0043565]                                                                                                                                                                                                                                                                                                                               |
| P05423 | chromatin binding [GO:0003682]; DNA binding [GO:0003677]; DNA-directed RNA polymerase activity [GO:0003899]                                                                                                                                                                                                                                                                                                                                                                                                                              |
| P30876 | chromatin binding [GO:0003682]; DNA binding [GO:0003677]; DNA-directed RNA polymerase activity [GO:0003899]; metal ion binding [GO:0046872]; poly(A) RNA binding [GO:0044822]; ribonucleoside binding [GO:0032549]                                                                                                                                                                                                                                                                                                                       |
| O14802 | chromatin binding [GO:0003682]; DNA binding [GO:0003677]; DNA-directed RNA polymerase activity [GO:0003899]; ribonucleoside binding [GO:0032549]; zinc ion binding [GO:0008270]                                                                                                                                                                                                                                                                                                                                                          |
| P67809 | chromatin binding [GO:0003682]; DNA binding [GO:0003677]; double-stranded DNA binding [GO:0003690]; GTPase binding [GO:0051020]; poly(A) RNA binding [GO:0044822]; RNA binding [GO:0003723]; RNA polymerase II core promoter proximal region sequence-specific DNA binding [GO:0000978]; single-stranded DNA binding [GO:0003697]; transcriptional activator activity, RNA polymerase II core promoter proximal region sequence-specific binding [GO:0001077]; transcription factor activity, sequence-specific DNA binding [GO:0003700] |
| P54253 | chromatin binding [GO:0003682]; DNA binding [GO:0003677]; identical protein binding [GO:0042802]; poly(G) binding [GO:0034046]; poly(U) RNA binding [GO:0008266]; protein C-terminus binding [GO:0008022]; protein self-association [GO:0043621]                                                                                                                                                                                                                                                                                         |
| Q9Y2T7 | chromatin binding [GO:0003682]; DNA binding [GO:0003677]; lipid binding [GO:0008289]; mRNA 3'-UTR binding [GO:0003730]; ribonucleoprotein complex binding [GO:0043021]; translation regulator activity [GO:0045182]                                                                                                                                                                                                                                                                                                                      |
| P52747 | chromatin binding [GO:0003682]; DNA binding [GO:0003677]; metal ion binding [GO:0046872]                                                                                                                                                                                                                                                                                                                                                                                                                                                 |
| Q9BRR0 | chromatin binding [GO:0003682]; DNA binding [GO:0003677]; metal ion binding [GO:0046872]; RNA polymerase II core promoter proximal region sequence-specific DNA binding [GO:0000978]; sequence-specific DNA binding [GO:0043565]; transcriptional repressor activity, RNA polymerase II core promoter proximal region sequence-specific binding [GO:0001078]; transcription factor activity, sequence-specific DNA binding [GO:0003700]                                                                                                  |
| Q9HBE1 | chromatin binding [GO:0003682]; DNA binding [GO:0003677]; metal ion binding [GO:0046872]; RNA polymerase II core promoter proximal region sequence-specific DNA binding [GO:0000978]; transcriptional activator activity, RNA polymerase II core promoter proximal region sequence-specific binding [GO:0001077]                                                                                                                                                                                                                         |
| P29375 | chromatin binding [GO:0003682]; DNA binding [GO:0003677]; oxidoreductase activity, acting on paired donors, with incorporation or reduction of molecular oxygen, 2-oxoglutarate as one donor, and                                                                                                                                                                                                                                                                                                                                        |



|        |                                                                                                                                                                                                                                                                                                                                                                                                                                                                                                                                                                                                                                                     |
|--------|-----------------------------------------------------------------------------------------------------------------------------------------------------------------------------------------------------------------------------------------------------------------------------------------------------------------------------------------------------------------------------------------------------------------------------------------------------------------------------------------------------------------------------------------------------------------------------------------------------------------------------------------------------|
|        | incorporation of one atom each of oxygen into both donors [GO:0016706]; transcription coactivator activity [GO:0003713]; transcription factor activity, sequence-specific DNA binding [GO:0003700]; zinc ion binding [GO:0008270]                                                                                                                                                                                                                                                                                                                                                                                                                   |
| O75717 | chromatin binding [GO:0003682]; DNA binding [GO:0003677]; RNA binding [GO:0003723]                                                                                                                                                                                                                                                                                                                                                                                                                                                                                                                                                                  |
| O60563 | chromatin binding [GO:0003682]; DNA binding [GO:0003677]; snRNA binding [GO:0017069]; transcription regulatory region DNA binding [GO:0044212]                                                                                                                                                                                                                                                                                                                                                                                                                                                                                                      |
| Q9BQ87 | chromatin binding [GO:0003682]; DNA binding [GO:0003677]; transcription corepressor activity [GO:0003714]                                                                                                                                                                                                                                                                                                                                                                                                                                                                                                                                           |
| O00267 | chromatin binding [GO:0003682]; enzyme binding [GO:0019899]; poly(A) RNA binding [GO:0044822]; protein heterodimerization activity [GO:0046982]                                                                                                                                                                                                                                                                                                                                                                                                                                                                                                     |
| Q13112 | chromatin binding [GO:0003682]; histone binding [GO:0042393]; unfolded protein binding [GO:0051082]                                                                                                                                                                                                                                                                                                                                                                                                                                                                                                                                                 |
| Q9UPP1 | chromatin binding [GO:0003682]; histone demethylase activity [GO:0032452]; histone demethylase activity (H3-K27 specific) [GO:0071558]; histone demethylase activity (H3-K36 specific) [GO:0051864]; histone demethylase activity (H3-K9 specific) [GO:0032454]; histone demethylase activity (H4-K20 specific) [GO:0035575]; iron ion binding [GO:0005506]; methylated histone binding [GO:0035064]; oxidoreductase activity, acting on paired donors, with incorporation or reduction of molecular oxygen, 2-oxoglutarate as one donor, and incorporation of one atom each of oxygen into both donors [GO:0016706]; zinc ion binding [GO:0008270] |
| O75530 | chromatin binding [GO:0003682]; histone methyltransferase activity [GO:0042054]; identical protein binding [GO:0042802]                                                                                                                                                                                                                                                                                                                                                                                                                                                                                                                             |
| Q04724 | chromatin binding [GO:0003682]; identical protein binding [GO:0042802]; RNA polymerase II transcription corepressor activity [GO:0001106]; transcription factor binding [GO:0008134]                                                                                                                                                                                                                                                                                                                                                                                                                                                                |
| Q9UHC7 | chromatin binding [GO:0003682]; ligase activity [GO:0016874]; poly(A) RNA binding [GO:0044822]; ubiquitin-protein transferase activity [GO:0004842]; zinc ion binding [GO:0008270]                                                                                                                                                                                                                                                                                                                                                                                                                                                                  |
| O43623 | chromatin binding [GO:0003682]; metal ion binding [GO:0046872]; sequence-specific DNA binding [GO:0043565]; transcriptional repressor activity, RNA polymerase II core promoter proximal region sequence-specific binding [GO:0001078]; transcription factor activity, RNA polymerase II distal enhancer sequence-specific binding [GO:0003705]                                                                                                                                                                                                                                                                                                     |
| P18615 | chromatin binding [GO:0003682]; nucleotide binding [GO:0000166]; poly(A) RNA binding [GO:0044822]; RNA binding [GO:0003723]                                                                                                                                                                                                                                                                                                                                                                                                                                                                                                                         |
| O75179 | chromatin binding [GO:0003682]; poly(A) RNA binding [GO:0044822]                                                                                                                                                                                                                                                                                                                                                                                                                                                                                                                                                                                    |
| O75533 | chromatin binding [GO:0003682]; poly(A) RNA binding [GO:0044822]                                                                                                                                                                                                                                                                                                                                                                                                                                                                                                                                                                                    |
| Q8WTT2 | chromatin binding [GO:0003682]; poly(A) RNA binding [GO:0044822]                                                                                                                                                                                                                                                                                                                                                                                                                                                                                                                                                                                    |
| Q8IZL8 | chromatin binding [GO:0003682]; poly(A) RNA binding [GO:0044822]; transcription factor binding [GO:0008134]                                                                                                                                                                                                                                                                                                                                                                                                                                                                                                                                         |
| Q9GZV1 | chromatin binding [GO:0003682]; protein kinase B binding [GO:0043422]; RNA polymerase II sequence-specific DNA binding transcription factor binding [GO:0061629]; structural constituent of muscle [GO:0008307]; titin binding [GO:0031432]                                                                                                                                                                                                                                                                                                                                                                                                         |
| Q8N7H5 | chromatin binding [GO:0003682]; RNA polymerase II core binding [GO:0000993]                                                                                                                                                                                                                                                                                                                                                                                                                                                                                                                                                                         |
| Q00653 | chromatin binding [GO:0003682]; RNA polymerase II core promoter proximal region sequence-specific DNA binding [GO:0000978]; transcriptional activator activity, RNA polymerase II core promoter proximal region sequence-specific binding [GO:0001077]; transcription coactivator activity [GO:0003713]; transcription factor activity, sequence-specific DNA binding [GO:0003700]                                                                                                                                                                                                                                                                  |
| Q04864 | chromatin binding [GO:0003682]; RNA polymerase II distal enhancer sequence-specific DNA binding [GO:0000980]; transcriptional activator activity, RNA polymerase II distal enhancer sequence-specific binding [GO:0001205]; transcription factor activity, sequence-specific DNA binding [GO:0003700]                                                                                                                                                                                                                                                                                                                                               |
| Q92833 | chromatin binding [GO:0003682]; RNA polymerase II regulatory region sequence-specific DNA binding [GO:0000977]; transcriptional repressor activity, RNA polymerase II transcription regulatory region sequence-specific binding [GO:0001227]                                                                                                                                                                                                                                                                                                                                                                                                        |
| Q04727 | chromatin binding [GO:0003682]; transcription corepressor activity [GO:0003714]; transcription factor activity, RNA polymerase II distal enhancer sequence-specific binding [GO:0003705]                                                                                                                                                                                                                                                                                                                                                                                                                                                            |
| O95409 | chromatin DNA binding [GO:0031490]; DNA binding [GO:0003677]; metal ion binding [GO:0046872]; transcription factor activity, sequence-specific DNA binding [GO:0003700]                                                                                                                                                                                                                                                                                                                                                                                                                                                                             |
| Q7Z5L7 | collagen binding [GO:0005518]                                                                                                                                                                                                                                                                                                                                                                                                                                                                                                                                                                                                                       |
| Q6NUI6 | collagen binding [GO:0005518]; collagen fibril binding [GO:0098633]                                                                                                                                                                                                                                                                                                                                                                                                                                                                                                                                                                                 |
| P51884 | collagen binding [GO:0005518]; extracellular matrix structural constituent [GO:0005201]                                                                                                                                                                                                                                                                                                                                                                                                                                                                                                                                                             |

|        |                                                                                                                                                                                                                                                                                                                                                                                                                                                                                                                                                                                                                                                                                        |
|--------|----------------------------------------------------------------------------------------------------------------------------------------------------------------------------------------------------------------------------------------------------------------------------------------------------------------------------------------------------------------------------------------------------------------------------------------------------------------------------------------------------------------------------------------------------------------------------------------------------------------------------------------------------------------------------------------|
| Q8TF66 | collagen binding [GO:0005518]; fibronectin binding [GO:0001968]; laminin binding [GO:0043236]                                                                                                                                                                                                                                                                                                                                                                                                                                                                                                                                                                                          |
| P00751 | complement binding [GO:0001848]; serine-type endopeptidase activity [GO:0004252]                                                                                                                                                                                                                                                                                                                                                                                                                                                                                                                                                                                                       |
| Q14872 | core promoter binding [GO:0001047]; DNA binding [GO:0003677]; metal ion binding [GO:0046872]; RNA polymerase II core promoter proximal region sequence-specific DNA binding [GO:0000978]; RNA polymerase II core promoter sequence-specific DNA binding [GO:0000979]; transcriptional activator activity, RNA polymerase II core promoter proximal region sequence-specific binding [GO:0001077]; transcription coactivator activity [GO:0003713]; transcription factor activity, sequence-specific DNA binding [GO:0003700]                                                                                                                                                           |
| Q9BQG0 | core promoter binding [GO:0001047]; DNA-directed DNA polymerase activity [GO:0003887]; poly(A) RNA binding [GO:0044822]; sequence-specific DNA binding [GO:0043565]; transcription corepressor activity [GO:0003714]; transcription factor binding [GO:0008134]                                                                                                                                                                                                                                                                                                                                                                                                                        |
| Q9UKV8 | core promoter binding [GO:0001047]; double-stranded RNA binding [GO:0003725]; endoribonuclease activity [GO:0004521]; endoribonuclease activity, cleaving miRNA-paired mRNA [GO:0090624]; endoribonuclease activity, cleaving siRNA-paired mRNA [GO:0070551]; metal ion binding [GO:0046872]; miRNA binding [GO:0035198]; mRNA binding [GO:0003729]; poly(A) RNA binding [GO:0044822]; pre-miRNA binding [GO:0070883]; protein C-terminus binding [GO:0008022]; RNA 7-methylguanosine cap binding [GO:0000340]; RNA polymerase II core binding [GO:0000993]; single-stranded RNA binding [GO:0003727]; siRNA binding [GO:0035197]; translation initiation factor activity [GO:0003743] |
| Q9UL18 | core promoter binding [GO:0001047]; double-stranded RNA binding [GO:0003725]; miRNA binding [GO:0035198]; poly(A) RNA binding [GO:0044822]; pre-miRNA binding [GO:0070883]; RNA binding [GO:0003723]; RNA polymerase II core binding [GO:0000993]; RNA polymerase II core promoter proximal region sequence-specific DNA binding [GO:0000978]; single-stranded RNA binding [GO:0003727]                                                                                                                                                                                                                                                                                                |
| Q8IX12 | core promoter binding [GO:0001047]; ligand-dependent nuclear receptor transcription coactivator activity [GO:0030374]; poly(A) RNA binding [GO:0044822]; transcription coactivator activity [GO:0003713]; transcription corepressor activity [GO:0003714]                                                                                                                                                                                                                                                                                                                                                                                                                              |
| Q8WXF1 | core promoter binding [GO:0001047]; nucleotide binding [GO:0000166]; poly(A) RNA binding [GO:0044822]                                                                                                                                                                                                                                                                                                                                                                                                                                                                                                                                                                                  |
| Q00978 | core promoter binding [GO:0001047]; transcription factor activity, sequence-specific DNA binding [GO:0003700]                                                                                                                                                                                                                                                                                                                                                                                                                                                                                                                                                                          |
| Q9NP77 | CTD phosphatase activity [GO:0008420]                                                                                                                                                                                                                                                                                                                                                                                                                                                                                                                                                                                                                                                  |
| Q8IXW5 | CTD phosphatase activity [GO:0008420]; metal ion binding [GO:0046872]                                                                                                                                                                                                                                                                                                                                                                                                                                                                                                                                                                                                                  |
| Q86WV6 | cyclic-di-GMP binding [GO:0035438]; cyclic-GMP-AMP binding [GO:0061507]; identical protein binding [GO:0042802]; protein homodimerization activity [GO:0042803]; protein kinase binding [GO:0019901]; transcription factor binding [GO:0008134]                                                                                                                                                                                                                                                                                                                                                                                                                                        |
| Q969H0 | cyclin binding [GO:0030332]; identical protein binding [GO:0042802]; protein binding, bridging [GO:0030674]; transcription factor activity, sequence-specific DNA binding [GO:0003700]; ubiquitin protein ligase binding [GO:0031625]; ubiquitin-protein transferase activator activity [GO:0097027]                                                                                                                                                                                                                                                                                                                                                                                   |
| O75909 | cyclin-dependent protein serine/threonine kinase activity [GO:0004693]; protein kinase binding [GO:0019901]; RNA polymerase II carboxy-terminal domain kinase activity [GO:0008353]                                                                                                                                                                                                                                                                                                                                                                                                                                                                                                    |
| O94992 | cyclin-dependent protein serine/threonine kinase inhibitor activity [GO:0004861]; snRNA binding [GO:0017069]                                                                                                                                                                                                                                                                                                                                                                                                                                                                                                                                                                           |
| Q96MH2 | cyclin-dependent protein serine/threonine kinase inhibitor activity [GO:0004861]; snRNA binding [GO:0017069]                                                                                                                                                                                                                                                                                                                                                                                                                                                                                                                                                                           |
| Q9UNP9 | cyclosporin A binding [GO:0016018]; nucleotide binding [GO:0000166]; peptidyl-prolyl cis-trans isomerase activity [GO:0003755]; poly(A) RNA binding [GO:0044822]; RNA binding [GO:0003723]                                                                                                                                                                                                                                                                                                                                                                                                                                                                                             |
| P63244 | cysteine-type endopeptidase activator activity involved in apoptotic process [GO:0008656]; enzyme binding [GO:0019899]; ion channel inhibitor activity [GO:0008200]; poly(A) RNA binding [GO:0044822]; protein complex scaffold [GO:0032947]; protein homodimerization activity [GO:0042803]; protein kinase C binding [GO:0005080]; protein phosphatase binding [GO:0019903]; protein tyrosine kinase inhibitor activity [GO:0030292]; receptor binding [GO:0005102]; receptor tyrosine kinase binding [GO:0030971]; SH2 domain binding [GO:0042169]; signaling adaptor activity [GO:0035591]                                                                                         |
| Q9HC16 | cytidine deaminase activity [GO:0004126]; deoxycytidine deaminase activity [GO:0047844]; protein homodimerization activity [GO:0042803]; RNA binding [GO:0003723]; zinc ion binding [GO:0008270]                                                                                                                                                                                                                                                                                                                                                                                                                                                                                       |
| P31941 | cytidine deaminase activity [GO:0004126]; deoxycytidine deaminase activity [GO:0047844]; zinc ion binding [GO:0008270]                                                                                                                                                                                                                                                                                                                                                                                                                                                                                                                                                                 |

|        |                                                                                                                                                                                                                                                                                                                                                                                                                                                                               |
|--------|-------------------------------------------------------------------------------------------------------------------------------------------------------------------------------------------------------------------------------------------------------------------------------------------------------------------------------------------------------------------------------------------------------------------------------------------------------------------------------|
| Q8IUX4 | cytidine deaminase activity [GO:0004126]; poly(A) RNA binding [GO:0044822]; RNA binding [GO:0003723]; zinc ion binding [GO:0008270]                                                                                                                                                                                                                                                                                                                                           |
| Q9Y235 | cytidine deaminase activity [GO:0004126]; RNA binding [GO:0003723]; zinc ion binding [GO:0008270]                                                                                                                                                                                                                                                                                                                                                                             |
| Q9GZX7 | cytidine deaminase activity [GO:0004126]; ubiquitin protein ligase binding [GO:0031625]; zinc ion binding [GO:0008270]                                                                                                                                                                                                                                                                                                                                                        |
| Q6NTF7 | cytidine deaminase activity [GO:0004126]; zinc ion binding [GO:0008270]                                                                                                                                                                                                                                                                                                                                                                                                       |
| Q12904 | cytokine activity [GO:0005125]; GTPase binding [GO:0051020]; protein homodimerization activity [GO:0042803]; tRNA binding [GO:0000049]                                                                                                                                                                                                                                                                                                                                        |
| Q16531 | damaged DNA binding [GO:0003684]; DNA binding [GO:0003677]                                                                                                                                                                                                                                                                                                                                                                                                                    |
| Q92466 | damaged DNA binding [GO:0003684]; DNA binding [GO:0003677]                                                                                                                                                                                                                                                                                                                                                                                                                    |
| P23396 | damaged DNA binding [GO:0003684]; DNA-(apurinic or apyrimidinic site) lyase activity [GO:0003906]; enzyme binding [GO:0019899]; iron-sulfur cluster binding [GO:0051536]; mRNA binding [GO:0003729]; NF-kappaB binding [GO:0051059]; oxidized purine nucleobase lesion DNA N-glycosylase activity [GO:0008534]; poly(A) RNA binding [GO:0044822]; protein kinase A binding [GO:0051018]; protein kinase binding [GO:0019901]; structural constituent of ribosome [GO:0003735] |
| Q9NS91 | damaged DNA binding [GO:0003684]; ligase activity [GO:0016874]; polyubiquitin binding [GO:0031593]; single-stranded DNA-dependent ATPase activity [GO:0043142]; ubiquitin protein ligase activity [GO:0061630]; ubiquitin protein ligase binding [GO:0031625]; Y-form DNA binding [GO:0000403]; zinc ion binding [GO:0008270]                                                                                                                                                 |
| Q9NUX5 | DEAD/H-box RNA helicase binding [GO:0017151]; G-rich strand telomeric DNA binding [GO:0098505]; single-stranded telomeric DNA binding [GO:0043047]; telomerase inhibitor activity [GO:0010521]                                                                                                                                                                                                                                                                                |
| P52758 | deaminase activity [GO:0019239]; endoribonuclease activity, producing 3'-phosphomonoesters [GO:0016892]; long-chain fatty acid binding [GO:0036041]; platinum binding [GO:1904012]; poly(A) RNA binding [GO:0044822]; transition metal ion binding [GO:0046914]; xenon atom binding [GO:1904013]                                                                                                                                                                              |
| Q9UK73 | death receptor binding [GO:0005123]; ubiquitin-protein transferase activity [GO:0004842]                                                                                                                                                                                                                                                                                                                                                                                      |
| Q9UH17 | deoxycytidine deaminase activity [GO:0047844]; poly(A) RNA binding [GO:0044822]; zinc ion binding [GO:0008270]                                                                                                                                                                                                                                                                                                                                                                |
| Q9Y2C9 | diacyl lipopeptide binding [GO:0042498]; lipopeptide binding [GO:0071723]; receptor activity [GO:0004872]; transmembrane signaling receptor activity [GO:0004888]                                                                                                                                                                                                                                                                                                             |
| O60603 | diacyl lipopeptide binding [GO:0042498]; lipopolysaccharide binding [GO:0001530]; lipopolysaccharide receptor activity [GO:0001875]; lipoteichoic acid binding [GO:0070891]; peptidoglycan binding [GO:0042834]; protein heterodimerization activity [GO:0046982]; receptor activity [GO:0004872]; signaling pattern recognition receptor activity [GO:0008329]; transmembrane signaling receptor activity [GO:0004888]; triacyl lipopeptide binding [GO:0042497]             |
| O14607 | dioxygenase activity [GO:0051213]; histone demethylase activity (H3-K27 specific) [GO:0071558]; metal ion binding [GO:0046872]                                                                                                                                                                                                                                                                                                                                                |
| O15550 | dioxygenase activity [GO:0051213]; histone demethylase activity (H3-K27 specific) [GO:0071558]; metal ion binding [GO:0046872]; RNA polymerase II core promoter proximal region sequence-specific DNA binding [GO:0000978]                                                                                                                                                                                                                                                    |
| O75151 | dioxygenase activity [GO:0051213]; histone demethylase activity (H3-K9 specific) [GO:0032454]; iron ion binding [GO:0005506]; methylated histone binding [GO:0035064]; zinc ion binding [GO:0008270]                                                                                                                                                                                                                                                                          |
| Q6B0I6 | dioxygenase activity [GO:0051213]; histone demethylase activity (H3-K9 specific) [GO:0032454]; metal ion binding [GO:0046872]                                                                                                                                                                                                                                                                                                                                                 |
| B2RXH2 | dioxygenase activity [GO:0051213]; metal ion binding [GO:0046872]                                                                                                                                                                                                                                                                                                                                                                                                             |
| Q15652 | dioxygenase activity [GO:0051213]; metal ion binding [GO:0046872]; thyroid hormone receptor binding [GO:0046966]                                                                                                                                                                                                                                                                                                                                                              |
| O94953 | dioxygenase activity [GO:0051213]; zinc ion binding [GO:0008270]                                                                                                                                                                                                                                                                                                                                                                                                              |
| Q15573 | DNA binding [GO:0003677]                                                                                                                                                                                                                                                                                                                                                                                                                                                      |
| Q92966 | DNA binding [GO:0003677]                                                                                                                                                                                                                                                                                                                                                                                                                                                      |
| Q969F1 | DNA binding [GO:0003677]                                                                                                                                                                                                                                                                                                                                                                                                                                                      |
| Q9H5J8 | DNA binding [GO:0003677]                                                                                                                                                                                                                                                                                                                                                                                                                                                      |
| Q9H9Q4 | DNA binding [GO:0003677]                                                                                                                                                                                                                                                                                                                                                                                                                                                      |
| Q9UBB9 | DNA binding [GO:0003677]                                                                                                                                                                                                                                                                                                                                                                                                                                                      |

|        |                                                                                                                                                                                                                                                                                                                                                                                        |
|--------|----------------------------------------------------------------------------------------------------------------------------------------------------------------------------------------------------------------------------------------------------------------------------------------------------------------------------------------------------------------------------------------|
| Q9Y5Q8 | DNA binding [GO:0003677]                                                                                                                                                                                                                                                                                                                                                               |
| Q96AP0 | DNA binding [GO:0003677]; DNA polymerase binding [GO:0070182]                                                                                                                                                                                                                                                                                                                          |
| Q8NDF8 | DNA binding [GO:0003677]; DNA-directed DNA polymerase activity [GO:0003887]; metal ion binding [GO:0046872]; poly(A) RNA binding [GO:0044822]; polynucleotide adenylyltransferase activity [GO:0004652]                                                                                                                                                                                |
| Q5XG87 | DNA binding [GO:0003677]; DNA-directed DNA polymerase activity [GO:0003887]; metal ion binding [GO:0046872]; polynucleotide adenylyltransferase activity [GO:0004652]; SMC family protein binding [GO:0043221]                                                                                                                                                                         |
| O15160 | DNA binding [GO:0003677]; DNA-directed RNA polymerase activity [GO:0003899]                                                                                                                                                                                                                                                                                                            |
| P19387 | DNA binding [GO:0003677]; DNA-directed RNA polymerase activity [GO:0003899]                                                                                                                                                                                                                                                                                                            |
| P19388 | DNA binding [GO:0003677]; DNA-directed RNA polymerase activity [GO:0003899]                                                                                                                                                                                                                                                                                                            |
| P52434 | DNA binding [GO:0003677]; DNA-directed RNA polymerase activity [GO:0003899]                                                                                                                                                                                                                                                                                                            |
| P61218 | DNA binding [GO:0003677]; DNA-directed RNA polymerase activity [GO:0003899]                                                                                                                                                                                                                                                                                                            |
| Q9BUI4 | DNA binding [GO:0003677]; DNA-directed RNA polymerase activity [GO:0003899]                                                                                                                                                                                                                                                                                                            |
| Q9BWH6 | DNA binding [GO:0003677]; DNA-directed RNA polymerase activity [GO:0003899]                                                                                                                                                                                                                                                                                                            |
| Q9GZM3 | DNA binding [GO:0003677]; DNA-directed RNA polymerase activity [GO:0003899]                                                                                                                                                                                                                                                                                                            |
| Q9GZS1 | DNA binding [GO:0003677]; DNA-directed RNA polymerase activity [GO:0003899]                                                                                                                                                                                                                                                                                                            |
| Q9H1A7 | DNA binding [GO:0003677]; DNA-directed RNA polymerase activity [GO:0003899]                                                                                                                                                                                                                                                                                                            |
| Q9H1D9 | DNA binding [GO:0003677]; DNA-directed RNA polymerase activity [GO:0003899]                                                                                                                                                                                                                                                                                                            |
| Q9Y2S0 | DNA binding [GO:0003677]; DNA-directed RNA polymerase activity [GO:0003899]                                                                                                                                                                                                                                                                                                            |
| Q9Y535 | DNA binding [GO:0003677]; DNA-directed RNA polymerase activity [GO:0003899]                                                                                                                                                                                                                                                                                                            |
| P52435 | DNA binding [GO:0003677]; DNA-directed RNA polymerase activity [GO:0003899]; LRR domain binding [GO:0030275]                                                                                                                                                                                                                                                                           |
| P24928 | DNA binding [GO:0003677]; DNA-directed RNA polymerase activity [GO:0003899]; metal ion binding [GO:0046872]; poly(A) RNA binding [GO:0044822]; RNA-directed RNA polymerase activity [GO:0003968]; ubiquitin protein ligase binding [GO:0031625]                                                                                                                                        |
| Q9H9Y6 | DNA binding [GO:0003677]; DNA-directed RNA polymerase activity [GO:0003899]; metal ion binding [GO:0046872]; ribonucleoside binding [GO:0032549]                                                                                                                                                                                                                                       |
| Q9NW08 | DNA binding [GO:0003677]; DNA-directed RNA polymerase activity [GO:0003899]; metal ion binding [GO:0046872]; ribonucleoside binding [GO:0032549]                                                                                                                                                                                                                                       |
| O00411 | DNA binding [GO:0003677]; DNA-directed RNA polymerase activity [GO:0003899]; poly(A) RNA binding [GO:0044822]                                                                                                                                                                                                                                                                          |
| O95602 | DNA binding [GO:0003677]; DNA-directed RNA polymerase activity [GO:0003899]; zinc ion binding [GO:0008270]                                                                                                                                                                                                                                                                             |
| P36954 | DNA binding [GO:0003677]; DNA-directed RNA polymerase activity [GO:0003899]; zinc ion binding [GO:0008270]                                                                                                                                                                                                                                                                             |
| P53803 | DNA binding [GO:0003677]; DNA-directed RNA polymerase activity [GO:0003899]; zinc ion binding [GO:0008270]                                                                                                                                                                                                                                                                             |
| P62875 | DNA binding [GO:0003677]; DNA-directed RNA polymerase activity [GO:0003899]; zinc ion binding [GO:0008270]                                                                                                                                                                                                                                                                             |
| Q05516 | DNA binding [GO:0003677]; double-stranded DNA binding [GO:0003690]; identical protein binding [GO:0042802]; metal ion binding [GO:0046872]; protein homodimerization activity [GO:0042803]; RNA polymerase II distal enhancer sequence-specific DNA binding [GO:0000980]; transcriptional repressor activity, RNA polymerase II distal enhancer sequence-specific binding [GO:0001206] |
| O14979 | DNA binding [GO:0003677]; double-stranded DNA binding [GO:0003690]; nucleotide binding [GO:0000166]; poly(A) binding [GO:0008143]; poly(A) RNA binding [GO:0044822]; poly(G) binding [GO:0034046]; single-stranded DNA binding [GO:0003697]                                                                                                                                            |
| Q9H171 | DNA binding [GO:0003677]; double-stranded RNA adenosine deaminase activity [GO:0003726]; left-handed Z-DNA binding [GO:0003692]; RNA binding [GO:0003723]                                                                                                                                                                                                                              |
| P55265 | DNA binding [GO:0003677]; double-stranded RNA adenosine deaminase activity [GO:0003726]; metal ion binding [GO:0046872]; poly(A) RNA binding [GO:0044822]                                                                                                                                                                                                                              |
| Q9NR97 | DNA binding [GO:0003677]; double-stranded RNA binding [GO:0003725]; drug binding [GO:0008144]; receptor activity [GO:0004872]; RNA binding [GO:0003723]; single-stranded RNA binding [GO:0003727]                                                                                                                                                                                      |

|        |                                                                                                                                                                                                                                                                                                                                                                                                                                                                                                                                                                                                            |
|--------|------------------------------------------------------------------------------------------------------------------------------------------------------------------------------------------------------------------------------------------------------------------------------------------------------------------------------------------------------------------------------------------------------------------------------------------------------------------------------------------------------------------------------------------------------------------------------------------------------------|
| Q12906 | DNA binding [GO:0003677]; double-stranded RNA binding [GO:0003725]; poly(A) RNA binding [GO:0044822]; RNA binding [GO:0003723]                                                                                                                                                                                                                                                                                                                                                                                                                                                                             |
| Q96SI9 | DNA binding [GO:0003677]; double-stranded RNA binding [GO:0003725]; poly(A) RNA binding [GO:0044822]; single-stranded RNA binding [GO:0003727]                                                                                                                                                                                                                                                                                                                                                                                                                                                             |
| P25490 | DNA binding [GO:0003677]; enhancer sequence-specific DNA binding [GO:0001158]; four-way junction DNA binding [GO:0000400]; RNA binding [GO:0003723]; SMAD binding [GO:0046332]; transcriptional repressor activity, RNA polymerase II core promoter proximal region sequence-specific binding [GO:0001078]; transcription coactivator activity [GO:0003713]; transcription corepressor activity [GO:0003714]; transcription factor activity, sequence-specific DNA binding [GO:0003700]; transcription regulatory region DNA binding [GO:0044212]; zinc ion binding [GO:0008270]                           |
| Q9UKN8 | DNA binding [GO:0003677]; enzyme activator activity [GO:0008047]; histone acetyltransferase activity [GO:0004402]                                                                                                                                                                                                                                                                                                                                                                                                                                                                                          |
| Q15366 | DNA binding [GO:0003677]; enzyme binding [GO:0019899]; poly(A) RNA binding [GO:0044822]; RNA binding [GO:0003723]; ubiquitin protein ligase binding [GO:0031625]                                                                                                                                                                                                                                                                                                                                                                                                                                           |
| Q8N895 | DNA binding [GO:0003677]; estrogen receptor binding [GO:0030331]; metal ion binding [GO:0046872]; transcription corepressor activity [GO:0003714]                                                                                                                                                                                                                                                                                                                                                                                                                                                          |
| Q15072 | DNA binding [GO:0003677]; heparin binding [GO:0008201]; transcription factor activity, sequence-specific DNA binding [GO:0003700]; zinc ion binding [GO:0008270]                                                                                                                                                                                                                                                                                                                                                                                                                                           |
| Q9UGL1 | DNA binding [GO:0003677]; histone demethylase activity (H3-dimethyl-K4 specific) [GO:0034648]; histone demethylase activity (H3-K4 specific) [GO:0032453]; histone demethylase activity (H3-trimethyl-K4 specific) [GO:0034647]; oxidoreductase activity, acting on paired donors, with incorporation or reduction of molecular oxygen, 2-oxoglutarate as one donor, and incorporation of one atom each of oxygen into both donors [GO:0016706]; transcription corepressor activity [GO:0003714]; transcription factor activity, sequence-specific DNA binding [GO:0003700]; zinc ion binding [GO:0008270] |
| P41229 | DNA binding [GO:0003677]; histone demethylase activity (H3-K4 specific) [GO:0032453]; oxidoreductase activity, acting on paired donors, with incorporation or reduction of molecular oxygen, 2-oxoglutarate as one donor, and incorporation of one atom each of oxygen into both donors [GO:0016706]; zinc ion binding [GO:0008270]                                                                                                                                                                                                                                                                        |
| Q9BY66 | DNA binding [GO:0003677]; histone demethylase activity (H3-K4 specific) [GO:0032453]; oxidoreductase activity, acting on paired donors, with incorporation or reduction of molecular oxygen, 2-oxoglutarate as one donor, and incorporation of one atom each of oxygen into both donors [GO:0016706]; zinc ion binding [GO:0008270]                                                                                                                                                                                                                                                                        |
| P19474 | DNA binding [GO:0003677]; identical protein binding [GO:0042802]; ligase activity [GO:0016874]; RNA binding [GO:0003723]; ubiquitin-protein transferase activity [GO:0004842]; zinc ion binding [GO:0008270]                                                                                                                                                                                                                                                                                                                                                                                               |
| Q9H9D4 | DNA binding [GO:0003677]; identical protein binding [GO:0042802]; metal ion binding [GO:0046872]                                                                                                                                                                                                                                                                                                                                                                                                                                                                                                           |
| Q9UHK0 | DNA binding [GO:0003677]; identical protein binding [GO:0042802]; metal ion binding [GO:0046872]; protein binding, bridging [GO:0030674]; RNA binding [GO:0003723]                                                                                                                                                                                                                                                                                                                                                                                                                                         |
| Q14151 | DNA binding [GO:0003677]; identical protein binding [GO:0042802]; nucleotide binding [GO:0000166]; poly(A) RNA binding [GO:0044822]                                                                                                                                                                                                                                                                                                                                                                                                                                                                        |
| Q9UHX1 | DNA binding [GO:0003677]; identical protein binding [GO:0042802]; nucleotide binding [GO:0000166]; poly(A) RNA binding [GO:0044822]                                                                                                                                                                                                                                                                                                                                                                                                                                                                        |
| P35637 | DNA binding [GO:0003677]; identical protein binding [GO:0042802]; nucleotide binding [GO:0000166]; poly(A) RNA binding [GO:0044822]; RNA binding [GO:0003723]; transcription coactivator activity [GO:0003713]; zinc ion binding [GO:0008270]                                                                                                                                                                                                                                                                                                                                                              |
| Q07666 | DNA binding [GO:0003677]; identical protein binding [GO:0042802]; poly(A) binding [GO:0008143]; poly(A) RNA binding [GO:0044822]; poly(U) RNA binding [GO:0008266]; RNA binding [GO:0003723]; SH3/SH2 adaptor activity [GO:0005070]                                                                                                                                                                                                                                                                                                                                                                        |
| Q14653 | DNA binding [GO:0003677]; identical protein binding [GO:0042802]; protein homodimerization activity [GO:0042803]; regulatory region DNA binding [GO:0000975]; transcription cofactor activity [GO:0003712]; transcription factor activity, sequence-specific DNA binding [GO:0003700]                                                                                                                                                                                                                                                                                                                      |
| P17036 | DNA binding [GO:0003677]; identical protein binding [GO:0042802]; zinc ion binding [GO:0008270]                                                                                                                                                                                                                                                                                                                                                                                                                                                                                                            |
| Q9HBD1 | DNA binding [GO:0003677]; ligase activity [GO:0016874]; mRNA binding [GO:0003729]; poly(A) RNA binding [GO:0044822]; ubiquitin-protein transferase activity [GO:0004842]; zinc ion binding [GO:0008270]                                                                                                                                                                                                                                                                                                                                                                                                    |
| A6NDX5 | DNA binding [GO:0003677]; metal ion binding [GO:0046872]                                                                                                                                                                                                                                                                                                                                                                                                                                                                                                                                                   |
| A6NFI3 | DNA binding [GO:0003677]; metal ion binding [GO:0046872]                                                                                                                                                                                                                                                                                                                                                                                                                                                                                                                                                   |

|        |                                                          |
|--------|----------------------------------------------------------|
| A6NHJ4 | DNA binding [GO:0003677]; metal ion binding [GO:0046872] |
| A6NK53 | DNA binding [GO:0003677]; metal ion binding [GO:0046872] |
| A6NM28 | DNA binding [GO:0003677]; metal ion binding [GO:0046872] |
| A6NN14 | DNA binding [GO:0003677]; metal ion binding [GO:0046872] |
| A8MQ14 | DNA binding [GO:0003677]; metal ion binding [GO:0046872] |
| A8MT65 | DNA binding [GO:0003677]; metal ion binding [GO:0046872] |
| A8MXY4 | DNA binding [GO:0003677]; metal ion binding [GO:0046872] |
| O15015 | DNA binding [GO:0003677]; metal ion binding [GO:0046872] |
| O43167 | DNA binding [GO:0003677]; metal ion binding [GO:0046872] |
| O43361 | DNA binding [GO:0003677]; metal ion binding [GO:0046872] |
| O75437 | DNA binding [GO:0003677]; metal ion binding [GO:0046872] |
| O75467 | DNA binding [GO:0003677]; metal ion binding [GO:0046872] |
| P0CG24 | DNA binding [GO:0003677]; metal ion binding [GO:0046872] |
| P0CJ79 | DNA binding [GO:0003677]; metal ion binding [GO:0046872] |
| P10072 | DNA binding [GO:0003677]; metal ion binding [GO:0046872] |
| P15621 | DNA binding [GO:0003677]; metal ion binding [GO:0046872] |
| P16415 | DNA binding [GO:0003677]; metal ion binding [GO:0046872] |
| P17021 | DNA binding [GO:0003677]; metal ion binding [GO:0046872] |
| P17041 | DNA binding [GO:0003677]; metal ion binding [GO:0046872] |
| P21506 | DNA binding [GO:0003677]; metal ion binding [GO:0046872] |
| P31629 | DNA binding [GO:0003677]; metal ion binding [GO:0046872] |
| P36508 | DNA binding [GO:0003677]; metal ion binding [GO:0046872] |
| Q13360 | DNA binding [GO:0003677]; metal ion binding [GO:0046872] |
| Q14584 | DNA binding [GO:0003677]; metal ion binding [GO:0046872] |
| Q147U1 | DNA binding [GO:0003677]; metal ion binding [GO:0046872] |
| Q14929 | DNA binding [GO:0003677]; metal ion binding [GO:0046872] |
| Q15935 | DNA binding [GO:0003677]; metal ion binding [GO:0046872] |
| Q15973 | DNA binding [GO:0003677]; metal ion binding [GO:0046872] |
| Q2M1K9 | DNA binding [GO:0003677]; metal ion binding [GO:0046872] |
| Q2M3W8 | DNA binding [GO:0003677]; metal ion binding [GO:0046872] |
| Q2M3X9 | DNA binding [GO:0003677]; metal ion binding [GO:0046872] |
| Q3KNS6 | DNA binding [GO:0003677]; metal ion binding [GO:0046872] |
| Q3KP31 | DNA binding [GO:0003677]; metal ion binding [GO:0046872] |
| Q494X3 | DNA binding [GO:0003677]; metal ion binding [GO:0046872] |
| Q499Z4 | DNA binding [GO:0003677]; metal ion binding [GO:0046872] |
| Q4V348 | DNA binding [GO:0003677]; metal ion binding [GO:0046872] |
| Q5MCW4 | DNA binding [GO:0003677]; metal ion binding [GO:0046872] |
| Q5SXM1 | DNA binding [GO:0003677]; metal ion binding [GO:0046872] |
| Q5T619 | DNA binding [GO:0003677]; metal ion binding [GO:0046872] |
| Q5TEC3 | DNA binding [GO:0003677]; metal ion binding [GO:0046872] |
| Q5VIY5 | DNA binding [GO:0003677]; metal ion binding [GO:0046872] |
| Q68EA5 | DNA binding [GO:0003677]; metal ion binding [GO:0046872] |
| Q6AW86 | DNA binding [GO:0003677]; metal ion binding [GO:0046872] |
| Q6DD87 | DNA binding [GO:0003677]; metal ion binding [GO:0046872] |

|        |                                                          |
|--------|----------------------------------------------------------|
| Q6IV72 | DNA binding [GO:0003677]; metal ion binding [GO:0046872] |
| Q6NX45 | DNA binding [GO:0003677]; metal ion binding [GO:0046872] |
| Q6P1L6 | DNA binding [GO:0003677]; metal ion binding [GO:0046872] |
| Q6P280 | DNA binding [GO:0003677]; metal ion binding [GO:0046872] |
| Q6P9A1 | DNA binding [GO:0003677]; metal ion binding [GO:0046872] |
| Q6ZMY9 | DNA binding [GO:0003677]; metal ion binding [GO:0046872] |
| Q6ZN55 | DNA binding [GO:0003677]; metal ion binding [GO:0046872] |
| Q6ZNG0 | DNA binding [GO:0003677]; metal ion binding [GO:0046872] |
| Q6ZNH5 | DNA binding [GO:0003677]; metal ion binding [GO:0046872] |
| Q6ZQV5 | DNA binding [GO:0003677]; metal ion binding [GO:0046872] |
| Q7L3S4 | DNA binding [GO:0003677]; metal ion binding [GO:0046872] |
| Q7L945 | DNA binding [GO:0003677]; metal ion binding [GO:0046872] |
| Q7Z3I7 | DNA binding [GO:0003677]; metal ion binding [GO:0046872] |
| Q7Z7K2 | DNA binding [GO:0003677]; metal ion binding [GO:0046872] |
| Q86TJ5 | DNA binding [GO:0003677]; metal ion binding [GO:0046872] |
| Q86UD4 | DNA binding [GO:0003677]; metal ion binding [GO:0046872] |
| Q86UQ0 | DNA binding [GO:0003677]; metal ion binding [GO:0046872] |
| Q86VK4 | DNA binding [GO:0003677]; metal ion binding [GO:0046872] |
| Q86XN6 | DNA binding [GO:0003677]; metal ion binding [GO:0046872] |
| Q8IVP9 | DNA binding [GO:0003677]; metal ion binding [GO:0046872] |
| Q8IYB9 | DNA binding [GO:0003677]; metal ion binding [GO:0046872] |
| Q8IYI8 | DNA binding [GO:0003677]; metal ion binding [GO:0046872] |
| Q8N2I2 | DNA binding [GO:0003677]; metal ion binding [GO:0046872] |
| Q8N7K0 | DNA binding [GO:0003677]; metal ion binding [GO:0046872] |
| Q8N883 | DNA binding [GO:0003677]; metal ion binding [GO:0046872] |
| Q8N8L2 | DNA binding [GO:0003677]; metal ion binding [GO:0046872] |
| Q8N8Z8 | DNA binding [GO:0003677]; metal ion binding [GO:0046872] |
| Q8N972 | DNA binding [GO:0003677]; metal ion binding [GO:0046872] |
| Q8N988 | DNA binding [GO:0003677]; metal ion binding [GO:0046872] |
| Q8N9L1 | DNA binding [GO:0003677]; metal ion binding [GO:0046872] |
| Q8N9Z0 | DNA binding [GO:0003677]; metal ion binding [GO:0046872] |
| Q8NB42 | DNA binding [GO:0003677]; metal ion binding [GO:0046872] |
| Q8NCK3 | DNA binding [GO:0003677]; metal ion binding [GO:0046872] |
| Q8NDP4 | DNA binding [GO:0003677]; metal ion binding [GO:0046872] |
| Q8NEP9 | DNA binding [GO:0003677]; metal ion binding [GO:0046872] |
| Q8TA94 | DNA binding [GO:0003677]; metal ion binding [GO:0046872] |
| Q8TC21 | DNA binding [GO:0003677]; metal ion binding [GO:0046872] |
| Q8TD17 | DNA binding [GO:0003677]; metal ion binding [GO:0046872] |
| Q8TF20 | DNA binding [GO:0003677]; metal ion binding [GO:0046872] |
| Q8TF50 | DNA binding [GO:0003677]; metal ion binding [GO:0046872] |
| Q8WTR7 | DNA binding [GO:0003677]; metal ion binding [GO:0046872] |
| Q969W8 | DNA binding [GO:0003677]; metal ion binding [GO:0046872] |
| Q96BV0 | DNA binding [GO:0003677]; metal ion binding [GO:0046872] |
| Q96CS4 | DNA binding [GO:0003677]; metal ion binding [GO:0046872] |

|        |                                                                                                                                                                                                                                                                                                                                                                                                                                                                                              |
|--------|----------------------------------------------------------------------------------------------------------------------------------------------------------------------------------------------------------------------------------------------------------------------------------------------------------------------------------------------------------------------------------------------------------------------------------------------------------------------------------------------|
| Q96GE5 | DNA binding [GO:0003677]; metal ion binding [GO:0046872]                                                                                                                                                                                                                                                                                                                                                                                                                                     |
| Q96IR2 | DNA binding [GO:0003677]; metal ion binding [GO:0046872]                                                                                                                                                                                                                                                                                                                                                                                                                                     |
| Q96JF6 | DNA binding [GO:0003677]; metal ion binding [GO:0046872]                                                                                                                                                                                                                                                                                                                                                                                                                                     |
| Q96JL9 | DNA binding [GO:0003677]; metal ion binding [GO:0046872]                                                                                                                                                                                                                                                                                                                                                                                                                                     |
| Q96MR9 | DNA binding [GO:0003677]; metal ion binding [GO:0046872]                                                                                                                                                                                                                                                                                                                                                                                                                                     |
| Q96MU6 | DNA binding [GO:0003677]; metal ion binding [GO:0046872]                                                                                                                                                                                                                                                                                                                                                                                                                                     |
| Q96MX3 | DNA binding [GO:0003677]; metal ion binding [GO:0046872]                                                                                                                                                                                                                                                                                                                                                                                                                                     |
| Q96NG5 | DNA binding [GO:0003677]; metal ion binding [GO:0046872]                                                                                                                                                                                                                                                                                                                                                                                                                                     |
| Q96NG8 | DNA binding [GO:0003677]; metal ion binding [GO:0046872]                                                                                                                                                                                                                                                                                                                                                                                                                                     |
| Q96NJ3 | DNA binding [GO:0003677]; metal ion binding [GO:0046872]                                                                                                                                                                                                                                                                                                                                                                                                                                     |
| Q96NL3 | DNA binding [GO:0003677]; metal ion binding [GO:0046872]                                                                                                                                                                                                                                                                                                                                                                                                                                     |
| Q96SE7 | DNA binding [GO:0003677]; metal ion binding [GO:0046872]                                                                                                                                                                                                                                                                                                                                                                                                                                     |
| Q9BR84 | DNA binding [GO:0003677]; metal ion binding [GO:0046872]                                                                                                                                                                                                                                                                                                                                                                                                                                     |
| Q9BS34 | DNA binding [GO:0003677]; metal ion binding [GO:0046872]                                                                                                                                                                                                                                                                                                                                                                                                                                     |
| Q9BUY5 | DNA binding [GO:0003677]; metal ion binding [GO:0046872]                                                                                                                                                                                                                                                                                                                                                                                                                                     |
| Q9BWM5 | DNA binding [GO:0003677]; metal ion binding [GO:0046872]                                                                                                                                                                                                                                                                                                                                                                                                                                     |
| Q9BXA9 | DNA binding [GO:0003677]; metal ion binding [GO:0046872]                                                                                                                                                                                                                                                                                                                                                                                                                                     |
| Q9H0M5 | DNA binding [GO:0003677]; metal ion binding [GO:0046872]                                                                                                                                                                                                                                                                                                                                                                                                                                     |
| Q9H7R0 | DNA binding [GO:0003677]; metal ion binding [GO:0046872]                                                                                                                                                                                                                                                                                                                                                                                                                                     |
| Q9HCG1 | DNA binding [GO:0003677]; metal ion binding [GO:0046872]                                                                                                                                                                                                                                                                                                                                                                                                                                     |
| Q9NSD4 | DNA binding [GO:0003677]; metal ion binding [GO:0046872]                                                                                                                                                                                                                                                                                                                                                                                                                                     |
| Q9NV72 | DNA binding [GO:0003677]; metal ion binding [GO:0046872]                                                                                                                                                                                                                                                                                                                                                                                                                                     |
| Q9NW07 | DNA binding [GO:0003677]; metal ion binding [GO:0046872]                                                                                                                                                                                                                                                                                                                                                                                                                                     |
| Q9NZL3 | DNA binding [GO:0003677]; metal ion binding [GO:0046872]                                                                                                                                                                                                                                                                                                                                                                                                                                     |
| Q9P2F9 | DNA binding [GO:0003677]; metal ion binding [GO:0046872]                                                                                                                                                                                                                                                                                                                                                                                                                                     |
| Q9UC06 | DNA binding [GO:0003677]; metal ion binding [GO:0046872]                                                                                                                                                                                                                                                                                                                                                                                                                                     |
| Q9UC07 | DNA binding [GO:0003677]; metal ion binding [GO:0046872]                                                                                                                                                                                                                                                                                                                                                                                                                                     |
| Q9UII5 | DNA binding [GO:0003677]; metal ion binding [GO:0046872]                                                                                                                                                                                                                                                                                                                                                                                                                                     |
| Q9UJQ4 | DNA binding [GO:0003677]; metal ion binding [GO:0046872]                                                                                                                                                                                                                                                                                                                                                                                                                                     |
| Q9UJU3 | DNA binding [GO:0003677]; metal ion binding [GO:0046872]                                                                                                                                                                                                                                                                                                                                                                                                                                     |
| Q9UJW7 | DNA binding [GO:0003677]; metal ion binding [GO:0046872]                                                                                                                                                                                                                                                                                                                                                                                                                                     |
| Q9UJW8 | DNA binding [GO:0003677]; metal ion binding [GO:0046872]                                                                                                                                                                                                                                                                                                                                                                                                                                     |
| Q9UK10 | DNA binding [GO:0003677]; metal ion binding [GO:0046872]                                                                                                                                                                                                                                                                                                                                                                                                                                     |
| Q9UK13 | DNA binding [GO:0003677]; metal ion binding [GO:0046872]                                                                                                                                                                                                                                                                                                                                                                                                                                     |
| Q9UL36 | DNA binding [GO:0003677]; metal ion binding [GO:0046872]                                                                                                                                                                                                                                                                                                                                                                                                                                     |
| Q9Y2A4 | DNA binding [GO:0003677]; metal ion binding [GO:0046872]                                                                                                                                                                                                                                                                                                                                                                                                                                     |
| Q9Y3M9 | DNA binding [GO:0003677]; metal ion binding [GO:0046872]                                                                                                                                                                                                                                                                                                                                                                                                                                     |
| Q9Y467 | DNA binding [GO:0003677]; metal ion binding [GO:0046872]                                                                                                                                                                                                                                                                                                                                                                                                                                     |
| Q9NQV6 | DNA binding [GO:0003677]; metal ion binding [GO:0046872]; methyltransferase activity [GO:0008168]                                                                                                                                                                                                                                                                                                                                                                                            |
| O14746 | DNA binding [GO:0003677]; metal ion binding [GO:0046872]; nucleotidyltransferase activity [GO:0016779]; protein homodimerization activity [GO:0042803]; RNA binding [GO:0003723]; RNA-directed DNA polymerase activity [GO:0003964]; telomerase activity [GO:0003720]; telomeric DNA binding [GO:0042162]; telomeric RNA binding [GO:0070034]; telomeric template RNA reverse transcriptase activity [GO:0003721]; transcription coactivator binding [GO:0001223]; tRNA binding [GO:0000049] |
| Q8NAF0 | DNA binding [GO:0003677]; metal ion binding [GO:0046872]; poly(A) RNA binding [GO:0044822]                                                                                                                                                                                                                                                                                                                                                                                                   |



|        |                                                                                                                                                                                                                                                                                  |
|--------|----------------------------------------------------------------------------------------------------------------------------------------------------------------------------------------------------------------------------------------------------------------------------------|
| Q9H5H4 | DNA binding [GO:0003677]; metal ion binding [GO:0046872]; poly(A) RNA binding [GO:0044822]                                                                                                                                                                                       |
| Q96JB3 | DNA binding [GO:0003677]; metal ion binding [GO:0046872]; protein C-terminus binding [GO:0008022]                                                                                                                                                                                |
| Q96K83 | DNA binding [GO:0003677]; metal ion binding [GO:0046872]; protein domain specific binding [GO:0019904]                                                                                                                                                                           |
| Q03112 | DNA binding [GO:0003677]; metal ion binding [GO:0046872]; protein homodimerization activity [GO:0042803]; transcription factor activity, sequence-specific DNA binding [GO:0003700]                                                                                              |
| Q92664 | DNA binding [GO:0003677]; metal ion binding [GO:0046872]; RNA binding [GO:0003723]                                                                                                                                                                                               |
| Q16600 | DNA binding [GO:0003677]; metal ion binding [GO:0046872]; RNA binding [GO:0003723]; transcription factor activity, sequence-specific DNA binding [GO:0003700]                                                                                                                    |
| Q03923 | DNA binding [GO:0003677]; metal ion binding [GO:0046872]; RNA polymerase II core promoter proximal region sequence-specific DNA binding [GO:0000978]; transcription corepressor activity [GO:0003714]; transcription factor activity, sequence-specific DNA binding [GO:0003700] |
| P17010 | DNA binding [GO:0003677]; metal ion binding [GO:0046872]; RNA polymerase II regulatory region sequence-specific DNA binding [GO:0000977]; transcription coactivator activity [GO:0003713]; transcription factor activity, sequence-specific DNA binding [GO:0003700]             |
| A6NJL1 | DNA binding [GO:0003677]; metal ion binding [GO:0046872]; RNA polymerase II transcription factor activity, sequence-specific DNA binding [GO:0000981]                                                                                                                            |
| Q6IQ21 | DNA binding [GO:0003677]; metal ion binding [GO:0046872]; RNA polymerase II transcription factor activity, sequence-specific DNA binding [GO:0000981]                                                                                                                            |
| Q9NX65 | DNA binding [GO:0003677]; metal ion binding [GO:0046872]; RNA polymerase II transcription factor activity, sequence-specific DNA binding [GO:0000981]                                                                                                                            |
| P13682 | DNA binding [GO:0003677]; metal ion binding [GO:0046872]; sequence-specific DNA binding [GO:0043565]; transcription factor activity, sequence-specific DNA binding [GO:0003700]                                                                                                  |
| P0CJ78 | DNA binding [GO:0003677]; metal ion binding [GO:0046872]; transcription cofactor activity [GO:0003712]                                                                                                                                                                           |
| Q5HYK9 | DNA binding [GO:0003677]; metal ion binding [GO:0046872]; transcription cofactor activity [GO:0003712]                                                                                                                                                                           |
| Q6ZS27 | DNA binding [GO:0003677]; metal ion binding [GO:0046872]; transcription cofactor activity [GO:0003712]                                                                                                                                                                           |
| Q8N1W2 | DNA binding [GO:0003677]; metal ion binding [GO:0046872]; transcription cofactor activity [GO:0003712]                                                                                                                                                                           |
| Q8TAW3 | DNA binding [GO:0003677]; metal ion binding [GO:0046872]; transcription cofactor activity [GO:0003712]                                                                                                                                                                           |
| P52737 | DNA binding [GO:0003677]; metal ion binding [GO:0046872]; transcription corepressor activity [GO:0003714]                                                                                                                                                                        |
| A2RRD8 | DNA binding [GO:0003677]; metal ion binding [GO:0046872]; transcription factor activity, sequence-specific DNA binding [GO:0003700]                                                                                                                                              |
| A6NNF4 | DNA binding [GO:0003677]; metal ion binding [GO:0046872]; transcription factor activity, sequence-specific DNA binding [GO:0003700]                                                                                                                                              |
| B4DU55 | DNA binding [GO:0003677]; metal ion binding [GO:0046872]; transcription factor activity, sequence-specific DNA binding [GO:0003700]                                                                                                                                              |
| O14709 | DNA binding [GO:0003677]; metal ion binding [GO:0046872]; transcription factor activity, sequence-specific DNA binding [GO:0003700]                                                                                                                                              |
| O60304 | DNA binding [GO:0003677]; metal ion binding [GO:0046872]; transcription factor activity, sequence-specific DNA binding [GO:0003700]                                                                                                                                              |
| O60765 | DNA binding [GO:0003677]; metal ion binding [GO:0046872]; transcription factor activity, sequence-specific DNA binding [GO:0003700]                                                                                                                                              |
| O75123 | DNA binding [GO:0003677]; metal ion binding [GO:0046872]; transcription factor activity, sequence-specific DNA binding [GO:0003700]                                                                                                                                              |
| O75290 | DNA binding [GO:0003677]; metal ion binding [GO:0046872]; transcription factor activity, sequence-specific DNA binding [GO:0003700]                                                                                                                                              |
| O75820 | DNA binding [GO:0003677]; metal ion binding [GO:0046872]; transcription factor activity, sequence-specific DNA binding [GO:0003700]                                                                                                                                              |
| O94892 | DNA binding [GO:0003677]; metal ion binding [GO:0046872]; transcription factor activity, sequence-specific DNA binding [GO:0003700]                                                                                                                                              |
| P0CG31 | DNA binding [GO:0003677]; metal ion binding [GO:0046872]; transcription factor activity, sequence-specific DNA binding [GO:0003700]                                                                                                                                              |

[illegible]

[illegible]

[illegible]

|        |                                                                                                                                                                                                        |
|--------|--------------------------------------------------------------------------------------------------------------------------------------------------------------------------------------------------------|
|        | specific DNA binding [GO:0003700]                                                                                                                                                                      |
| Q96PQ6 | DNA binding [GO:0003677]; metal ion binding [GO:0046872]; transcription factor activity, sequence-specific DNA binding [GO:0003700]                                                                    |
| Q96RE9 | DNA binding [GO:0003677]; metal ion binding [GO:0046872]; transcription factor activity, sequence-specific DNA binding [GO:0003700]                                                                    |
| Q96SK3 | DNA binding [GO:0003677]; metal ion binding [GO:0046872]; transcription factor activity, sequence-specific DNA binding [GO:0003700]                                                                    |
| Q9BRH9 | DNA binding [GO:0003677]; metal ion binding [GO:0046872]; transcription factor activity, sequence-specific DNA binding [GO:0003700]                                                                    |
| Q9BX82 | DNA binding [GO:0003677]; metal ion binding [GO:0046872]; transcription factor activity, sequence-specific DNA binding [GO:0003700]                                                                    |
| Q9C0F3 | DNA binding [GO:0003677]; metal ion binding [GO:0046872]; transcription factor activity, sequence-specific DNA binding [GO:0003700]                                                                    |
| Q9H7R5 | DNA binding [GO:0003677]; metal ion binding [GO:0046872]; transcription factor activity, sequence-specific DNA binding [GO:0003700]                                                                    |
| Q9HBT7 | DNA binding [GO:0003677]; metal ion binding [GO:0046872]; transcription factor activity, sequence-specific DNA binding [GO:0003700]                                                                    |
| Q9HBT8 | DNA binding [GO:0003677]; metal ion binding [GO:0046872]; transcription factor activity, sequence-specific DNA binding [GO:0003700]                                                                    |
| Q9HCL3 | DNA binding [GO:0003677]; metal ion binding [GO:0046872]; transcription factor activity, sequence-specific DNA binding [GO:0003700]                                                                    |
| Q9NQZ8 | DNA binding [GO:0003677]; metal ion binding [GO:0046872]; transcription factor activity, sequence-specific DNA binding [GO:0003700]                                                                    |
| Q9NYT6 | DNA binding [GO:0003677]; metal ion binding [GO:0046872]; transcription factor activity, sequence-specific DNA binding [GO:0003700]                                                                    |
| Q9P0L1 | DNA binding [GO:0003677]; metal ion binding [GO:0046872]; transcription factor activity, sequence-specific DNA binding [GO:0003700]                                                                    |
| Q9P2J8 | DNA binding [GO:0003677]; metal ion binding [GO:0046872]; transcription factor activity, sequence-specific DNA binding [GO:0003700]                                                                    |
| Q9UEG4 | DNA binding [GO:0003677]; metal ion binding [GO:0046872]; transcription factor activity, sequence-specific DNA binding [GO:0003700]                                                                    |
| Q9UJL9 | DNA binding [GO:0003677]; metal ion binding [GO:0046872]; transcription factor activity, sequence-specific DNA binding [GO:0003700]                                                                    |
| Q9UJN7 | DNA binding [GO:0003677]; metal ion binding [GO:0046872]; transcription factor activity, sequence-specific DNA binding [GO:0003700]                                                                    |
| Q9ULM2 | DNA binding [GO:0003677]; metal ion binding [GO:0046872]; transcription factor activity, sequence-specific DNA binding [GO:0003700]                                                                    |
| Q9Y2G7 | DNA binding [GO:0003677]; metal ion binding [GO:0046872]; transcription factor activity, sequence-specific DNA binding [GO:0003700]                                                                    |
| Q9Y2P0 | DNA binding [GO:0003677]; metal ion binding [GO:0046872]; transcription factor activity, sequence-specific DNA binding [GO:0003700]                                                                    |
| Q9Y6R6 | DNA binding [GO:0003677]; metal ion binding [GO:0046872]; transcription factor activity, sequence-specific DNA binding [GO:0003700]                                                                    |
| Q8NDQ6 | DNA binding [GO:0003677]; metal ion binding [GO:0046872]; transcription factor activity, sequence-specific DNA binding [GO:0003700]; translation repressor activity, nucleic acid binding [GO:0000900] |
| Q8TF47 | DNA binding [GO:0003677]; metal ion binding [GO:0046872]; transcriptional repressor activity, RNA polymerase II core promoter proximal region sequence-specific binding [GO:0001078]                   |
| Q9BXS6 | DNA binding [GO:0003677]; microtubule binding [GO:0008017]; poly(A) RNA binding [GO:0044822]                                                                                                           |
| Q9H9Z2 | DNA binding [GO:0003677]; miRNA binding [GO:0035198]; mRNA binding [GO:0003729]; RNA binding [GO:0003723]; zinc ion binding [GO:0008270]                                                               |
| Q96PM9 | DNA binding [GO:0003677]; mRNA 3'-UTR binding [GO:0003730]; p53 binding [GO:0002039]; poly(A) RNA binding [GO:0044822]; zinc ion binding [GO:0008270]                                                  |
| Q9Y2V2 | DNA binding [GO:0003677]; mRNA 3'-UTR binding [GO:0003730]; phosphatase binding [GO:0019902]                                                                                                           |
| P52756 | DNA binding [GO:0003677]; mRNA binding [GO:0003729]; nucleotide binding [GO:0000166]; poly(A) RNA binding [GO:0044822]; RNA binding [GO:0003723]; zinc ion binding [GO:0008270]                        |
| O95232 | DNA binding [GO:0003677]; mRNA binding [GO:0003729]; poly(A) RNA binding [GO:0044822]                                                                                                                  |
| Q92945 | DNA binding [GO:0003677]; mRNA binding [GO:0003729]; poly(A) RNA binding [GO:0044822]                                                                                                                  |

|        |                                                                                                                                                                                                                             |
|--------|-----------------------------------------------------------------------------------------------------------------------------------------------------------------------------------------------------------------------------|
| P18583 | DNA binding [GO:0003677]; nucleic acid binding [GO:0003676]; poly(A) RNA binding [GO:0044822]; RNA binding [GO:0003723]                                                                                                     |
| Q9P2K5 | DNA binding [GO:0003677]; nucleotide binding [GO:0000166]; poly(A) RNA binding [GO:0044822]                                                                                                                                 |
| P78332 | DNA binding [GO:0003677]; nucleotide binding [GO:0000166]; poly(A) RNA binding [GO:0044822]; RNA binding [GO:0003723]                                                                                                       |
| A6NFN3 | DNA binding [GO:0003677]; nucleotide binding [GO:0000166]; RNA binding [GO:0003723]                                                                                                                                         |
| O15226 | DNA binding [GO:0003677]; poly(A) RNA binding [GO:0044822]                                                                                                                                                                  |
| O75534 | DNA binding [GO:0003677]; poly(A) RNA binding [GO:0044822]                                                                                                                                                                  |
| Q9NYF8 | DNA binding [GO:0003677]; poly(A) RNA binding [GO:0044822]                                                                                                                                                                  |
| O75683 | DNA binding [GO:0003677]; poly(A) RNA binding [GO:0044822]; RNA binding [GO:0003723]                                                                                                                                        |
| P57721 | DNA binding [GO:0003677]; poly(A) RNA binding [GO:0044822]; RNA binding [GO:0003723]                                                                                                                                        |
| P57723 | DNA binding [GO:0003677]; poly(A) RNA binding [GO:0044822]; RNA binding [GO:0003723]                                                                                                                                        |
| Q6ZN17 | DNA binding [GO:0003677]; poly(A) RNA binding [GO:0044822]; RNA binding [GO:0003723]; zinc ion binding [GO:0008270]                                                                                                         |
| Q8WVM0 | DNA binding [GO:0003677]; poly(A) RNA binding [GO:0044822]; rRNA (adenine-N6,N6-)-dimethyltransferase activity [GO:0000179]                                                                                                 |
| P62841 | DNA binding [GO:0003677]; poly(A) RNA binding [GO:0044822]; structural constituent of ribosome [GO:0003735]                                                                                                                 |
| Q9H307 | DNA binding [GO:0003677]; poly(A) RNA binding [GO:0044822]; structural molecule activity [GO:0005198]                                                                                                                       |
| Q99459 | DNA binding [GO:0003677]; poly(A) RNA binding [GO:0044822]; WD40-repeat domain binding [GO:0071987]                                                                                                                         |
| Q96KR1 | DNA binding [GO:0003677]; poly(A) RNA binding [GO:0044822]; zinc ion binding [GO:0008270]                                                                                                                                   |
| P20749 | DNA binding [GO:0003677]; protein binding, bridging [GO:0030674]; transcription factor activity, sequence-specific DNA binding [GO:0003700]; transcription factor binding [GO:0008134]                                      |
| O14896 | DNA binding [GO:0003677]; regulatory region DNA binding [GO:0000975]; transcription factor activity, sequence-specific DNA binding [GO:0003700]                                                                             |
| O60381 | DNA binding [GO:0003677]; RNA binding [GO:0003723]                                                                                                                                                                          |
| P0C7T5 | DNA binding [GO:0003677]; RNA binding [GO:0003723]                                                                                                                                                                          |
| Q96FV9 | DNA binding [GO:0003677]; RNA binding [GO:0003723]                                                                                                                                                                          |
| Q9Y534 | DNA binding [GO:0003677]; RNA binding [GO:0003723]                                                                                                                                                                          |
| Q13901 | DNA binding [GO:0003677]; RNA binding [GO:0003723]; transcription corepressor activity [GO:0003714]                                                                                                                         |
| Q8TD23 | DNA binding [GO:0003677]; RNA polymerase II core promoter proximal region sequence-specific DNA binding [GO:0000978]; ubiquitin protein ligase binding [GO:0031625]; zinc ion binding [GO:0008270]                          |
| Q92985 | DNA binding [GO:0003677]; RNA polymerase II core promoter sequence-specific DNA binding [GO:0000979]; transcription factor activity, RNA polymerase II core promoter proximal region sequence-specific binding [GO:0000982] |
| P63135 | DNA binding [GO:0003677]; RNA-directed DNA polymerase activity [GO:0003964]; RNA-DNA hybrid ribonuclease activity [GO:0004523]; structural molecule activity [GO:0005198]; zinc ion binding [GO:0008270]                    |
| P10266 | DNA binding [GO:0003677]; RNA-directed DNA polymerase activity [GO:0003964]; RNA-DNA hybrid ribonuclease activity [GO:0004523]; zinc ion binding [GO:0008270]                                                               |
| P63132 | DNA binding [GO:0003677]; RNA-directed DNA polymerase activity [GO:0003964]; RNA-DNA hybrid ribonuclease activity [GO:0004523]; zinc ion binding [GO:0008270]                                                               |
| P63133 | DNA binding [GO:0003677]; RNA-directed DNA polymerase activity [GO:0003964]; RNA-DNA hybrid ribonuclease activity [GO:0004523]; zinc ion binding [GO:0008270]                                                               |
| P63136 | DNA binding [GO:0003677]; RNA-directed DNA polymerase activity [GO:0003964]; RNA-DNA hybrid ribonuclease activity [GO:0004523]; zinc ion binding [GO:0008270]                                                               |
| Q9BXR3 | DNA binding [GO:0003677]; RNA-directed DNA polymerase activity [GO:0003964]; RNA-DNA hybrid ribonuclease activity [GO:0004523]; zinc ion binding [GO:0008270]                                                               |
| Q9QC07 | DNA binding [GO:0003677]; RNA-directed DNA polymerase activity [GO:0003964]; RNA-DNA hybrid ribonuclease activity [GO:0004523]; zinc ion binding [GO:0008270]                                                               |
| Q9UQG0 | DNA binding [GO:0003677]; RNA-directed DNA polymerase activity [GO:0003964]; RNA-DNA hybrid ribonuclease activity [GO:0004523]; zinc ion binding [GO:0008270]                                                               |

|        |                                                                                                                                                                                                                                                                                                                                                                                                                                                                                                                                   |
|--------|-----------------------------------------------------------------------------------------------------------------------------------------------------------------------------------------------------------------------------------------------------------------------------------------------------------------------------------------------------------------------------------------------------------------------------------------------------------------------------------------------------------------------------------|
| Q9WJR5 | DNA binding [GO:0003677]; RNA-directed DNA polymerase activity [GO:0003964]; RNA-DNA hybrid ribonuclease activity [GO:0004523]; zinc ion binding [GO:0008270]                                                                                                                                                                                                                                                                                                                                                                     |
| P62380 | DNA binding [GO:0003677]; transcription coactivator activity [GO:0003713]                                                                                                                                                                                                                                                                                                                                                                                                                                                         |
| P82094 | DNA binding [GO:0003677]; transcription cofactor activity [GO:0003712]                                                                                                                                                                                                                                                                                                                                                                                                                                                            |
| Q6SJ96 | DNA binding [GO:0003677]; transcription factor activity, sequence-specific DNA binding [GO:0003700]                                                                                                                                                                                                                                                                                                                                                                                                                               |
| P29374 | DNA binding [GO:0003677]; transcription factor activity, sequence-specific DNA binding [GO:0003700]; transcription regulatory region DNA binding [GO:0044212]                                                                                                                                                                                                                                                                                                                                                                     |
| O95201 | DNA binding [GO:0003677]; transcription factor activity, sequence-specific DNA binding [GO:0003700]; zinc ion binding [GO:0008270]                                                                                                                                                                                                                                                                                                                                                                                                |
| P35789 | DNA binding [GO:0003677]; transcription factor activity, sequence-specific DNA binding [GO:0003700]; zinc ion binding [GO:0008270]                                                                                                                                                                                                                                                                                                                                                                                                |
| Q05481 | DNA binding [GO:0003677]; transcription factor activity, sequence-specific DNA binding [GO:0003700]; zinc ion binding [GO:0008270]                                                                                                                                                                                                                                                                                                                                                                                                |
| Q9NPC7 | DNA binding [GO:0003677]; transcription factor activity, sequence-specific DNA binding [GO:0003700]; zinc ion binding [GO:0008270]                                                                                                                                                                                                                                                                                                                                                                                                |
| Q9Y6Q3 | DNA binding [GO:0003677]; transcription factor activity, sequence-specific DNA binding [GO:0003700]; zinc ion binding [GO:0008270]                                                                                                                                                                                                                                                                                                                                                                                                |
| O60318 | DNA binding [GO:0003677]; transferase activity, transferring acyl groups [GO:0016746]                                                                                                                                                                                                                                                                                                                                                                                                                                             |
| Q9Y3C5 | DNA binding [GO:0003677]; ubiquitin-protein transferase activity [GO:0004842]; zinc ion binding [GO:0008270]                                                                                                                                                                                                                                                                                                                                                                                                                      |
| O43345 | DNA binding [GO:0003677]; zinc ion binding [GO:0008270]                                                                                                                                                                                                                                                                                                                                                                                                                                                                           |
| P51523 | DNA binding [GO:0003677]; zinc ion binding [GO:0008270]                                                                                                                                                                                                                                                                                                                                                                                                                                                                           |
| Q5H9K5 | DNA binding [GO:0003677]; zinc ion binding [GO:0008270]                                                                                                                                                                                                                                                                                                                                                                                                                                                                           |
| Q99676 | DNA binding [GO:0003677]; zinc ion binding [GO:0008270]                                                                                                                                                                                                                                                                                                                                                                                                                                                                           |
| Q9BSG1 | DNA binding [GO:0003677]; zinc ion binding [GO:0008270]                                                                                                                                                                                                                                                                                                                                                                                                                                                                           |
| Q9H898 | DNA binding [GO:0003677]; zinc ion binding [GO:0008270]                                                                                                                                                                                                                                                                                                                                                                                                                                                                           |
| Q9UL59 | DNA binding [GO:0003677]; zinc ion binding [GO:0008270]                                                                                                                                                                                                                                                                                                                                                                                                                                                                           |
| P49642 | DNA primase activity [GO:0003896]; metal ion binding [GO:0046872]                                                                                                                                                                                                                                                                                                                                                                                                                                                                 |
| Q9NVU0 | DNA-directed RNA polymerase activity [GO:0003899]                                                                                                                                                                                                                                                                                                                                                                                                                                                                                 |
| O15514 | DNA-directed RNA polymerase activity [GO:0003899]; nucleotide binding [GO:0000166]; translation initiation factor binding [GO:0031369]                                                                                                                                                                                                                                                                                                                                                                                            |
| O15446 | DNA-directed RNA polymerase activity [GO:0003899]; poly(A) RNA binding [GO:0044822]                                                                                                                                                                                                                                                                                                                                                                                                                                               |
| Q9H944 | DNA-directed RNA polymerase activity [GO:0003899]; RNA polymerase II transcription cofactor activity [GO:0001104]; transcription coactivator activity [GO:0003713]; ubiquitin protein ligase activity [GO:0061630]                                                                                                                                                                                                                                                                                                                |
| P62487 | DNA-directed RNA polymerase activity [GO:0003899]; single-stranded DNA binding [GO:0003697]; single-stranded RNA binding [GO:0003727]; translation initiation factor binding [GO:0031369]                                                                                                                                                                                                                                                                                                                                         |
| Q9C0B1 | DNA-N1-methyladenine dioxygenase activity [GO:0043734]; ferrous iron binding [GO:0008198]; oxidative DNA demethylase activity [GO:0035516]; oxidative RNA demethylase activity [GO:0035515]                                                                                                                                                                                                                                                                                                                                       |
| Q13148 | double-stranded DNA binding [GO:0003690]; identical protein binding [GO:0042802]; mRNA 3'-UTR binding [GO:0003730]; nucleotide binding [GO:0000166]; poly(A) RNA binding [GO:0044822]; RNA binding [GO:0003723]; transcriptional activator activity, RNA polymerase II distal enhancer sequence-specific binding [GO:0001205]; transcription factor activity, sequence-specific DNA binding [GO:0003700]                                                                                                                          |
| P16989 | double-stranded DNA binding [GO:0003690]; mRNA 3'-UTR binding [GO:0003730]; poly(A) RNA binding [GO:0044822]; Rho GTPase binding [GO:0017048]; RNA polymerase II regulatory region sequence-specific DNA binding [GO:0000977]; single-stranded DNA binding [GO:0003697]; transcriptional repressor activity, RNA polymerase II transcription regulatory region sequence-specific binding [GO:0001227]; transcription corepressor activity [GO:0003714]; transcription factor activity, sequence-specific DNA binding [GO:0003700] |
| P29558 | double-stranded DNA binding [GO:0003690]; nucleotide binding [GO:0000166]; poly(A) RNA binding [GO:0044822]; RNA binding [GO:0003723]; single-stranded DNA binding [GO:0003697]                                                                                                                                                                                                                                                                                                                                                   |
| Q14966 | double-stranded DNA binding [GO:0003690]; nucleotide binding [GO:0000166]; poly(A) RNA binding [GO:0044822]; RNA binding [GO:0003723]; zinc ion binding [GO:0008270]                                                                                                                                                                                                                                                                                                                                                              |

|        |                                                                                                                                                                                                                                                                                 |
|--------|---------------------------------------------------------------------------------------------------------------------------------------------------------------------------------------------------------------------------------------------------------------------------------|
| Q86U90 | double-stranded RNA binding [GO:0003725]                                                                                                                                                                                                                                        |
| Q9NYK1 | double-stranded RNA binding [GO:0003725]; drug binding [GO:0008144]; single-stranded RNA binding [GO:0003727]; siRNA binding [GO:0035197]; transmembrane signaling receptor activity [GO:0004888]                                                                               |
| O75569 | double-stranded RNA binding [GO:0003725]; enzyme activator activity [GO:0008047]; enzyme binding [GO:0019899]; identical protein binding [GO:0042802]; poly(A) RNA binding [GO:0044822]; protein homodimerization activity [GO:0042803]                                         |
| Q15633 | double-stranded RNA binding [GO:0003725]; enzyme binding [GO:0019899]; miRNA binding [GO:0035198]; pre-miRNA binding [GO:0070883]; protein homodimerization activity [GO:0042803]; protein N-terminus binding [GO:0047485]; siRNA binding [GO:0035197]                          |
| Q9UL40 | double-stranded RNA binding [GO:0003725]; enzyme binding [GO:0019899]; poly(A) RNA binding [GO:0044822]; zinc ion binding [GO:0008270]                                                                                                                                          |
| Q9NX74 | double-stranded RNA binding [GO:0003725]; flavin adenine dinucleotide binding [GO:0050660]; protein kinase inhibitor activity [GO:0004860]; tRNA dihydrouridine synthase activity [GO:0017150]                                                                                  |
| Q8WYQ5 | double-stranded RNA binding [GO:0003725]; heme binding [GO:0020037]; metal ion binding [GO:0046872]; primary miRNA binding [GO:0070878]; protein homodimerization activity [GO:0042803]                                                                                         |
| O15455 | double-stranded RNA binding [GO:0003725]; identical protein binding [GO:0042802]; receptor activity [GO:0004872]; transmembrane signaling receptor activity [GO:0004888]                                                                                                        |
| Q9NRR4 | double-stranded RNA binding [GO:0003725]; lipopolysaccharide binding [GO:0001530]; metal ion binding [GO:0046872]; poly(A) RNA binding [GO:0044822]; primary miRNA binding [GO:0070878]; protein homodimerization activity [GO:0042803]; ribonuclease III activity [GO:0004525] |
| Q9NR56 | double-stranded RNA binding [GO:0003725]; metal ion binding [GO:0046872]; poly(A) RNA binding [GO:0044822]; RNA binding [GO:0003723]                                                                                                                                            |
| Q9H9G7 | double-stranded RNA binding [GO:0003725]; miRNA binding [GO:0035198]; poly(A) RNA binding [GO:0044822]; pre-miRNA binding [GO:0070883]; single-stranded RNA binding [GO:0003727]                                                                                                |
| Q9HCK5 | double-stranded RNA binding [GO:0003725]; miRNA binding [GO:0035198]; pre-miRNA binding [GO:0070883]; single-stranded RNA binding [GO:0003727]                                                                                                                                  |
| O95793 | double-stranded RNA binding [GO:0003725]; poly(A) RNA binding [GO:0044822]                                                                                                                                                                                                      |
| Q9NUL3 | double-stranded RNA binding [GO:0003725]; poly(A) RNA binding [GO:0044822]                                                                                                                                                                                                      |
| P43034 | dynactin binding [GO:0034452]; dynein binding [GO:0045502]; heparin binding [GO:0008201]; microtubule binding [GO:0008017]; phospholipase binding [GO:0043274]; phosphoprotein binding [GO:0051219]; protein homodimerization activity [GO:0042803]                             |
| Q562E7 | dynein binding [GO:0045502]; microtubule binding [GO:0008017]                                                                                                                                                                                                                   |
| Q15061 | dynein binding [GO:0045502]; microtubule binding [GO:0008017]; poly(A) RNA binding [GO:0044822]                                                                                                                                                                                 |
| A1KZ92 | endonuclease activity [GO:0004519]; heme binding [GO:0020037]; metal ion binding [GO:0046872]; peroxidase activity [GO:0004601]                                                                                                                                                 |
| Q9BRX2 | endonuclease activity [GO:0004519]; metal ion binding [GO:0046872]                                                                                                                                                                                                              |
| P07288 | endopeptidase activity [GO:0004175]; hydrolase activity, acting on carbon-nitrogen (but not peptide) bonds, in linear amides [GO:0016811]; serine-type endopeptidase activity [GO:0004252]; serine-type peptidase activity [GO:0008236]                                         |
| P21128 | endoribonuclease activity [GO:0004521]; growth factor activity [GO:0008083]; manganese ion binding [GO:0030145]; polysaccharide binding [GO:0030247]; RNA binding [GO:0003723]; scavenger receptor activity [GO:0005044]; serine-type peptidase activity [GO:0008236]           |
| Q86US8 | endoribonuclease activity [GO:0004521]; metal ion binding [GO:0046872]; telomeric DNA binding [GO:0042162]                                                                                                                                                                      |
| Q9Y2P8 | endoribonuclease activity [GO:0004521]; RNA binding [GO:0003723]                                                                                                                                                                                                                |
| Q9HB65 | enhancer binding [GO:0035326]                                                                                                                                                                                                                                                   |
| O60237 | enzyme activator activity [GO:0008047]; phosphatase regulator activity [GO:0019208]                                                                                                                                                                                             |
| Q9NW82 | enzyme binding [GO:0019899]                                                                                                                                                                                                                                                     |
| Q8N163 | enzyme binding [GO:0019899]; enzyme inhibitor activity [GO:0004857]; poly(A) RNA binding [GO:0044822]; RNA polymerase II core binding [GO:0000993]                                                                                                                              |
| P06730 | enzyme binding [GO:0019899]; eukaryotic initiation factor 4G binding [GO:0031370]; poly(A) RNA binding [GO:0044822]; repressing transcription factor binding [GO:0070491]; RNA cap binding [GO:0000339]; translation initiation factor activity [GO:0003743]                    |
| P15880 | enzyme binding [GO:0019899]; fibroblast growth factor binding [GO:0017134]; mRNA binding [GO:0003729]; poly(A) RNA binding [GO:0044822]; structural constituent of ribosome [GO:0003735]                                                                                        |



|        |                                                                                                                                                                                                                                                                                                                                                               |
|--------|---------------------------------------------------------------------------------------------------------------------------------------------------------------------------------------------------------------------------------------------------------------------------------------------------------------------------------------------------------------|
| P62318 | enzyme binding [GO:0019899]; histone pre-mRNA DCP binding [GO:0071208]; poly(A) RNA binding [GO:0044822]                                                                                                                                                                                                                                                      |
| P25963 | enzyme binding [GO:0019899]; identical protein binding [GO:0042802]; NF-kappaB binding [GO:0051059]; nuclear localization sequence binding [GO:0008139]; transcription factor binding [GO:0008134]; ubiquitin protein ligase binding [GO:0031625]                                                                                                             |
| O15234 | enzyme binding [GO:0019899]; identical protein binding [GO:0042802]; poly(A) RNA binding [GO:0044822]; ubiquitin protein ligase binding [GO:0031625]                                                                                                                                                                                                          |
| Q9BWG6 | enzyme binding [GO:0019899]; metal ion binding [GO:0046872]                                                                                                                                                                                                                                                                                                   |
| Q9H2K2 | enzyme binding [GO:0019899]; metal ion binding [GO:0046872]; NAD+ ADP-ribosyltransferase activity [GO:0003950]                                                                                                                                                                                                                                                |
| Q10570 | enzyme binding [GO:0019899]; mRNA 3'-UTR AU-rich region binding [GO:0035925]                                                                                                                                                                                                                                                                                  |
| Q9Y383 | enzyme binding [GO:0019899]; mRNA binding [GO:0003729]; poly(A) RNA binding [GO:0044822]                                                                                                                                                                                                                                                                      |
| P26368 | enzyme binding [GO:0019899]; nucleotide binding [GO:0000166]; poly(A) RNA binding [GO:0044822]                                                                                                                                                                                                                                                                |
| O00628 | enzyme binding [GO:0019899]; peroxisome matrix targeting signal-2 binding [GO:0005053]; protein homodimerization activity [GO:0042803]                                                                                                                                                                                                                        |
| Q96PZ0 | enzyme binding [GO:0019899]; poly(A) RNA binding [GO:0044822]; pseudouridine synthase activity [GO:0009982]                                                                                                                                                                                                                                                   |
| P78316 | enzyme binding [GO:0019899]; poly(A) RNA binding [GO:0044822]; snoRNA binding [GO:0030515]                                                                                                                                                                                                                                                                    |
| Q12834 | enzyme binding [GO:0019899]; protein C-terminus binding [GO:0008022]                                                                                                                                                                                                                                                                                          |
| P20226 | enzyme binding [GO:0019899]; repressing transcription factor binding [GO:0070491]; RNA polymerase II core promoter proximal region sequence-specific DNA binding [GO:0000978]; transcription factor activity, sequence-specific DNA binding [GO:0003700]; transcription factor binding [GO:0008134]; transcription regulatory region DNA binding [GO:0044212] |
| P40337 | enzyme binding [GO:0019899]; transcription factor binding [GO:0008134]; ubiquitin protein ligase activity [GO:0061630]; ubiquitin-protein transferase activity [GO:0004842]                                                                                                                                                                                   |
| Q8N5D0 | enzyme inhibitor activity [GO:0004857]                                                                                                                                                                                                                                                                                                                        |
| P22792 | enzyme regulator activity [GO:0030234]                                                                                                                                                                                                                                                                                                                        |
| Q14232 | enzyme regulator activity [GO:0030234]; GDP binding [GO:0019003]; GTP binding [GO:0005525]; translation initiation factor activity [GO:0003743]                                                                                                                                                                                                               |
| Q8IZD4 | enzyme regulator activity [GO:0030234]; hydrolase activity [GO:0016787]; mRNA binding [GO:0003729]                                                                                                                                                                                                                                                            |
| Q9BSK4 | EP4 subtype prostaglandin E2 receptor binding [GO:0031867]; ubiquitin-protein transferase activity [GO:0004842]                                                                                                                                                                                                                                               |
| Q7Z6G8 | ephrin receptor binding [GO:0046875]                                                                                                                                                                                                                                                                                                                          |
| Q15650 | estrogen receptor binding [GO:0030331]; histone acetyltransferase binding [GO:0035035]; ligand-dependent nuclear receptor binding [GO:0016922]; protease binding [GO:0002020]; transcription coactivator activity [GO:0003713]; ubiquitin-like protein ligase binding [GO:0044389]; zinc ion binding [GO:0008270]                                             |
| Q96T76 | estrogen receptor binding [GO:0030331]; protein binding, bridging [GO:0030674]; receptor signaling complex scaffold activity [GO:0030159]; transcription coactivator activity [GO:0003713]                                                                                                                                                                    |
| Q6PKG0 | eukaryotic initiation factor 4E binding [GO:0008190]; mRNA 3'-UTR binding [GO:0003730]; mRNA 5'-UTR binding [GO:0048027]; poly(A) RNA binding [GO:0044822]; RNA cap binding [GO:0000339]; translation activator activity [GO:0008494]; translation initiation factor binding [GO:0031369]                                                                     |
| Q04637 | eukaryotic initiation factor 4E binding [GO:0008190]; poly(A) RNA binding [GO:0044822]; translation factor activity, RNA binding [GO:0008135]; translation initiation factor activity [GO:0003743]                                                                                                                                                            |
| O60516 | eukaryotic initiation factor 4E binding [GO:0008190]; translation repressor activity [GO:0030371]                                                                                                                                                                                                                                                             |
| Q13541 | eukaryotic initiation factor 4E binding [GO:0008190]; translation repressor activity [GO:0030371]                                                                                                                                                                                                                                                             |
| Q13542 | eukaryotic initiation factor 4E binding [GO:0008190]; translation repressor activity [GO:0030371]                                                                                                                                                                                                                                                             |
| Q8WTP8 | exonuclease activity [GO:0004527]; nucleic acid binding [GO:0003676]                                                                                                                                                                                                                                                                                          |
| Q96IC2 | exonuclease activity [GO:0004527]; nucleotide binding [GO:0000166]; RNA binding [GO:0003723]                                                                                                                                                                                                                                                                  |
| Q9H9L3 | exonuclease activity [GO:0004527]; poly(A) RNA binding [GO:0044822]                                                                                                                                                                                                                                                                                           |
| Q9GZR2 | exonuclease activity [GO:0004527]; poly(A) RNA binding [GO:0044822]; transcription factor activity, sequence-specific DNA binding [GO:0003700]                                                                                                                                                                                                                |
| Q8IU60 | exoribonuclease activity, producing 5'-phosphomonoesters [GO:0016896]; m7G(5')pppN diphosphatase                                                                                                                                                                                                                                                              |

|        |                                                                                                                                                                                                                                                                                                                                             |
|--------|---------------------------------------------------------------------------------------------------------------------------------------------------------------------------------------------------------------------------------------------------------------------------------------------------------------------------------------------|
|        | activity [GO:0050072]; manganese ion binding [GO:0030145]; RNA binding [GO:0003723]                                                                                                                                                                                                                                                         |
| P21810 | extracellular matrix binding [GO:0050840]; extracellular matrix structural constituent [GO:0005201]; glycosaminoglycan binding [GO:0005539]                                                                                                                                                                                                 |
| P07585 | extracellular matrix binding [GO:0050840]; glycosaminoglycan binding [GO:0005539]; poly(A) RNA binding [GO:0044822]                                                                                                                                                                                                                         |
| Q92626 | extracellular matrix structural constituent [GO:0005201]; heme binding [GO:0020037]; interleukin-1 receptor antagonist activity [GO:0005152]; metal ion binding [GO:0046872]; peroxidase activity [GO:0004601]                                                                                                                              |
| P51888 | extracellular matrix structural constituent [GO:0005201]; heparin binding [GO:0008201]                                                                                                                                                                                                                                                      |
| Q9BR61 | fatty-acyl-CoA binding [GO:0000062]; lipid binding [GO:0008289]                                                                                                                                                                                                                                                                             |
| P39019 | fibroblast growth factor binding [GO:0017134]; poly(A) RNA binding [GO:0044822]; protein homodimerization activity [GO:0042803]; protein kinase binding [GO:0019901]; structural constituent of ribosome [GO:0003735]                                                                                                                       |
| Q96G46 | flavin adenine dinucleotide binding [GO:0050660]; metal ion binding [GO:0046872]; poly(A) RNA binding [GO:0044822]; tRNA dihydrouridine synthase activity [GO:0017150]                                                                                                                                                                      |
| Q9Y2Z2 | flavin adenine dinucleotide binding [GO:0050660]; poly(A) RNA binding [GO:0044822]                                                                                                                                                                                                                                                          |
| O95620 | flavin adenine dinucleotide binding [GO:0050660]; tRNA dihydrouridine synthase activity [GO:0017150]                                                                                                                                                                                                                                        |
| Q6P1R4 | flavin adenine dinucleotide binding [GO:0050660]; tRNA dihydrouridine synthase activity [GO:0017150]                                                                                                                                                                                                                                        |
| Q68DV7 | frizzled binding [GO:0005109]; ligase activity [GO:0016874]; ubiquitin-protein transferase activity [GO:0004842]; zinc ion binding [GO:0008270]                                                                                                                                                                                             |
| Q9ULT6 | frizzled binding [GO:0005109]; ligase activity [GO:0016874]; ubiquitin-protein transferase activity [GO:0004842]; zinc ion binding [GO:0008270]                                                                                                                                                                                             |
| P59768 | G-protein beta-subunit binding [GO:0031681]; signal transducer activity [GO:0004871]                                                                                                                                                                                                                                                        |
| Q9HBX9 | G-protein coupled receptor activity [GO:0004930]; metal ion binding [GO:0046872]                                                                                                                                                                                                                                                            |
| O75473 | G-protein coupled receptor activity [GO:0004930]; transmembrane signaling receptor activity [GO:0004888]                                                                                                                                                                                                                                    |
| Q9BXB1 | G-protein coupled receptor activity [GO:0004930]; transmembrane signaling receptor activity [GO:0004888]                                                                                                                                                                                                                                    |
| P51114 | G-quadruplex RNA binding [GO:0002151]; mRNA 3'-UTR binding [GO:0003730]; mRNA binding [GO:0003729]; poly(A) RNA binding [GO:0044822]; RNA binding [GO:0003723]                                                                                                                                                                              |
| P00750 | glycoprotein binding [GO:0001948]; phosphoprotein binding [GO:0051219]; receptor binding [GO:0005102]; serine-type endopeptidase activity [GO:0004252]                                                                                                                                                                                      |
| Q14520 | glycosaminoglycan binding [GO:0005539]; peptidase activity [GO:0008233]                                                                                                                                                                                                                                                                     |
| Q9Y4C4 | GTP binding [GO:0005525]                                                                                                                                                                                                                                                                                                                    |
| Q07617 | GTP binding [GO:0005525]; hydrolase activity [GO:0016787]                                                                                                                                                                                                                                                                                   |
| Q9Y295 | GTP binding [GO:0005525]; identical protein binding [GO:0042802]; transcription factor binding [GO:0008134]                                                                                                                                                                                                                                 |
| O60942 | GTP binding [GO:0005525]; mRNA guanylyltransferase activity [GO:0004484]; polynucleotide 5'-phosphatase activity [GO:0004651]; protein tyrosine/serine/threonine phosphatase activity [GO:0008138]; protein tyrosine phosphatase activity [GO:0004725]; RNA guanylyltransferase activity [GO:0008192]; triphosphatase activity [GO:0050355] |
| O75616 | GTP binding [GO:0005525]; poly(A) RNA binding [GO:0044822]; ribosomal small subunit binding [GO:0043024]; rRNA binding [GO:0019843]                                                                                                                                                                                                         |
| Q96NW4 | GTPase activator activity [GO:0005096]; guanyl-nucleotide exchange factor activity [GO:0005085]; Rab GTPase binding [GO:0017137]                                                                                                                                                                                                            |
| Q969S9 | GTPase activity [GO:0003924]; GTP binding [GO:0005525]                                                                                                                                                                                                                                                                                      |
| Q969Y2 | GTPase activity [GO:0003924]; GTP binding [GO:0005525]                                                                                                                                                                                                                                                                                      |
| Q9H4K7 | GTPase activity [GO:0003924]; GTP binding [GO:0005525]; magnesium ion binding [GO:0000287]                                                                                                                                                                                                                                                  |
| A4D1E9 | GTPase activity [GO:0003924]; GTP binding [GO:0005525]; magnesium ion binding [GO:0000287]; poly(A) RNA binding [GO:0044822]                                                                                                                                                                                                                |
| Q13823 | GTPase activity [GO:0003924]; GTP binding [GO:0005525]; poly(A) RNA binding [GO:0044822]                                                                                                                                                                                                                                                    |
| Q15029 | GTPase activity [GO:0003924]; GTP binding [GO:0005525]; poly(A) RNA binding [GO:0044822]                                                                                                                                                                                                                                                    |
| Q9BVP2 | GTPase activity [GO:0003924]; GTP binding [GO:0005525]; poly(A) RNA binding [GO:0044822]                                                                                                                                                                                                                                                    |

|        |                                                                                                                                                                                                                                                                                                                                                                                                                                                                                               |
|--------|-----------------------------------------------------------------------------------------------------------------------------------------------------------------------------------------------------------------------------------------------------------------------------------------------------------------------------------------------------------------------------------------------------------------------------------------------------------------------------------------------|
| Q9BZE4 | GTPase activity [GO:0003924]; GTP binding [GO:0005525]; poly(A) RNA binding [GO:0044822]                                                                                                                                                                                                                                                                                                                                                                                                      |
| P13639 | GTPase activity [GO:0003924]; GTP binding [GO:0005525]; poly(A) RNA binding [GO:0044822]; protein kinase binding [GO:0019901]; translation elongation factor activity [GO:0003746]                                                                                                                                                                                                                                                                                                            |
| P68104 | GTPase activity [GO:0003924]; GTP binding [GO:0005525]; poly(A) RNA binding [GO:0044822]; protein kinase binding [GO:0019901]; translation elongation factor activity [GO:0003746]; tRNA binding [GO:0000049]                                                                                                                                                                                                                                                                                 |
| P46199 | GTPase activity [GO:0003924]; GTP binding [GO:0005525]; poly(A) RNA binding [GO:0044822]; ribosomal small subunit binding [GO:0043024]; translation factor activity, RNA binding [GO:0008135]; translation initiation factor activity [GO:0003743]                                                                                                                                                                                                                                            |
| P08240 | GTPase activity [GO:0003924]; GTP binding [GO:0005525]; poly(A) RNA binding [GO:0044822]; signal recognition particle binding [GO:0005047]                                                                                                                                                                                                                                                                                                                                                    |
| P49411 | GTPase activity [GO:0003924]; GTP binding [GO:0005525]; poly(A) RNA binding [GO:0044822]; translation elongation factor activity [GO:0003746]                                                                                                                                                                                                                                                                                                                                                 |
| Q96RP9 | GTPase activity [GO:0003924]; GTP binding [GO:0005525]; poly(A) RNA binding [GO:0044822]; translation elongation factor activity [GO:0003746]                                                                                                                                                                                                                                                                                                                                                 |
| O00178 | GTPase activity [GO:0003924]; GTP binding [GO:0005525]; poly(A) RNA binding [GO:0044822]; translation initiation factor activity [GO:0003743]                                                                                                                                                                                                                                                                                                                                                 |
| O60841 | GTPase activity [GO:0003924]; GTP binding [GO:0005525]; poly(A) RNA binding [GO:0044822]; translation initiation factor activity [GO:0003743]                                                                                                                                                                                                                                                                                                                                                 |
| P15170 | GTPase activity [GO:0003924]; GTP binding [GO:0005525]; poly(A) RNA binding [GO:0044822]; translation release factor activity [GO:0003747]                                                                                                                                                                                                                                                                                                                                                    |
| Q8IYD1 | GTPase activity [GO:0003924]; GTP binding [GO:0005525]; poly(A) RNA binding [GO:0044822]; translation release factor activity [GO:0003747]                                                                                                                                                                                                                                                                                                                                                    |
| Q05639 | GTPase activity [GO:0003924]; GTP binding [GO:0005525]; protein kinase binding [GO:0019901]; translation elongation factor activity [GO:0003746]; translation factor activity, RNA binding [GO:0008135]                                                                                                                                                                                                                                                                                       |
| P57772 | GTPase activity [GO:0003924]; GTP binding [GO:0005525]; ribonucleoprotein complex binding [GO:0043021]; selenocysteine insertion sequence binding [GO:0035368]; translation elongation factor activity [GO:0003746]; tRNA binding [GO:0000049]                                                                                                                                                                                                                                                |
| Q7Z2Z2 | GTPase activity [GO:0003924]; GTP binding [GO:0005525]; ribosome binding [GO:0043022]                                                                                                                                                                                                                                                                                                                                                                                                         |
| Q8N442 | GTPase activity [GO:0003924]; GTP binding [GO:0005525]; ribosome binding [GO:0043022]                                                                                                                                                                                                                                                                                                                                                                                                         |
| Q5VTE0 | GTPase activity [GO:0003924]; GTP binding [GO:0005525]; translation elongation factor activity [GO:0003746]                                                                                                                                                                                                                                                                                                                                                                                   |
| Q9Y450 | GTPase activity [GO:0003924]; GTP binding [GO:0005525]; translation elongation factor activity [GO:0003746]                                                                                                                                                                                                                                                                                                                                                                                   |
| P41091 | GTPase activity [GO:0003924]; GTP binding [GO:0005525]; translation factor activity, RNA binding [GO:0008135]; translation initiation factor activity [GO:0003743]                                                                                                                                                                                                                                                                                                                            |
| Q2VIR3 | GTPase activity [GO:0003924]; GTP binding [GO:0005525]; translation initiation factor activity [GO:0003743]                                                                                                                                                                                                                                                                                                                                                                                   |
| Q9BX10 | GTPase activity [GO:0003924]; GTP binding [GO:0005525]; translation initiation factor activity [GO:0003743]                                                                                                                                                                                                                                                                                                                                                                                   |
| P62873 | GTPase activity [GO:0003924]; GTPase binding [GO:0051020]; protein complex binding [GO:0032403]; signal transducer activity [GO:0004871]                                                                                                                                                                                                                                                                                                                                                      |
| P16520 | GTPase activity [GO:0003924]; GTPase binding [GO:0051020]; signal transducer activity [GO:0004871]                                                                                                                                                                                                                                                                                                                                                                                            |
| P63218 | GTPase activity [GO:0003924]; PDZ domain binding [GO:0030165]; signal transducer activity [GO:0004871]                                                                                                                                                                                                                                                                                                                                                                                        |
| O14610 | GTPase activity [GO:0003924]; signal transducer activity [GO:0004871]                                                                                                                                                                                                                                                                                                                                                                                                                         |
| P50151 | GTPase activity [GO:0003924]; signal transducer activity [GO:0004871]                                                                                                                                                                                                                                                                                                                                                                                                                         |
| P63215 | GTPase activity [GO:0003924]; signal transducer activity [GO:0004871]                                                                                                                                                                                                                                                                                                                                                                                                                         |
| Q9UK08 | GTPase activity [GO:0003924]; signal transducer activity [GO:0004871]                                                                                                                                                                                                                                                                                                                                                                                                                         |
| Q7Z5Q1 | GTPase inhibitor activity [GO:0005095]; mRNA 3'-UTR AU-rich region binding [GO:0035925]; mRNA 3'-UTR binding [GO:0003730]; nucleotide binding [GO:0000166]; poly(A) RNA binding [GO:0044822]; poly-pyrimidine tract binding [GO:0008187]; ribosomal large subunit binding [GO:0043023]; ribosomal small subunit binding [GO:0043024]; ribosome binding [GO:0043022]; translation factor activity, RNA binding [GO:0008135]; translation repressor activity, nucleic acid binding [GO:0000900] |
| Q6W2J9 | heat shock protein binding [GO:0031072]; histone deacetylase binding [GO:0042826]; transcription                                                                                                                                                                                                                                                                                                                                                                                              |

|        |                                                                                                                                                                                                                                                                                                                                                                                                                                                                                                                                                                          |
|--------|--------------------------------------------------------------------------------------------------------------------------------------------------------------------------------------------------------------------------------------------------------------------------------------------------------------------------------------------------------------------------------------------------------------------------------------------------------------------------------------------------------------------------------------------------------------------------|
|        | corepressor activity [GO:0003714]; transcription factor binding [GO:0008134]; transcription regulatory region DNA binding [GO:0044212]                                                                                                                                                                                                                                                                                                                                                                                                                                   |
| P00739 | hemoglobin binding [GO:0030492]                                                                                                                                                                                                                                                                                                                                                                                                                                                                                                                                          |
| Q13685 | heparin binding [GO:0008201]                                                                                                                                                                                                                                                                                                                                                                                                                                                                                                                                             |
| O94769 | heparin binding [GO:0008201]; integrin binding [GO:0005178]                                                                                                                                                                                                                                                                                                                                                                                                                                                                                                              |
| P03951 | heparin binding [GO:0008201]; serine-type endopeptidase activity [GO:0004252]                                                                                                                                                                                                                                                                                                                                                                                                                                                                                            |
| Q09028 | histone binding [GO:0042393]; histone deacetylase binding [GO:0042826]                                                                                                                                                                                                                                                                                                                                                                                                                                                                                                   |
| Q15020 | histone binding [GO:0042393]; nucleotide binding [GO:0000166]; poly(A) RNA binding [GO:0044822]; U4 snRNA binding [GO:0030621]; U6atac snRNA binding [GO:0030624]; U6 snRNA binding [GO:0017070]; ubiquitin-specific protease binding [GO:1990381]                                                                                                                                                                                                                                                                                                                       |
| Q6IA86 | histone binding [GO:0042393]; transcriptional repressor activity, RNA polymerase II transcription factor binding [GO:0001191]                                                                                                                                                                                                                                                                                                                                                                                                                                            |
| Q14526 | histone deacetylase binding [GO:0042826]; metal ion binding [GO:0046872]; sequence-specific DNA binding [GO:0043565]; transcription factor activity, sequence-specific DNA binding [GO:0003700]                                                                                                                                                                                                                                                                                                                                                                          |
| Q6ZMT4 | histone demethylase activity (H3-K27 specific) [GO:0071558]; histone demethylase activity (H3-K36 specific) [GO:0051864]; histone demethylase activity (H3-K9 specific) [GO:0032454]; histone demethylase activity (H4-K20 specific) [GO:0035575]; iron ion binding [GO:0005506]; methylated histone binding [GO:0035064]; oxidoreductase activity, acting on paired donors, with incorporation or reduction of molecular oxygen, 2-oxoglutarate as one donor, and incorporation of one atom each of oxygen into both donors [GO:0016706]; zinc ion binding [GO:0008270] |
| O75164 | histone demethylase activity (H3-K36 specific) [GO:0051864]; methylated histone binding [GO:0035064]; ubiquitin protein ligase binding [GO:0031625]; zinc ion binding [GO:0008270]                                                                                                                                                                                                                                                                                                                                                                                       |
| Q6NYC1 | histone demethylase activity (H3-R2 specific) [GO:0033746]; histone demethylase activity (H4-R3 specific) [GO:0033749]; identical protein binding [GO:0042802]; iron ion binding [GO:0005506]; peptidyl-lysine 5-dioxygenase activity [GO:0070815]; receptor activity [GO:0004872]; RNA binding [GO:0003723]; single-stranded RNA binding [GO:0003727]                                                                                                                                                                                                                   |
| Q969L4 | histone pre-mRNA DCP binding [GO:0071208]                                                                                                                                                                                                                                                                                                                                                                                                                                                                                                                                |
| Q14493 | histone pre-mRNA DCP binding [GO:0071208]; histone pre-mRNA stem-loop binding [GO:0071207]; mRNA binding [GO:0003729]; poly(A) RNA binding [GO:0044822]                                                                                                                                                                                                                                                                                                                                                                                                                  |
| P14678 | histone pre-mRNA DCP binding [GO:0071208]; poly(A) RNA binding [GO:0044822]                                                                                                                                                                                                                                                                                                                                                                                                                                                                                              |
| P22087 | histone-glutamine methyltransferase activity [GO:1990259]; poly(A) RNA binding [GO:0044822]; RNA binding [GO:0003723]; rRNA methyltransferase activity [GO:0008649]                                                                                                                                                                                                                                                                                                                                                                                                      |
| Q9H9B1 | histone-lysine N-methyltransferase activity [GO:0018024]; histone methyltransferase activity (H3-K27 specific) [GO:0046976]; histone methyltransferase activity (H3-K9 specific) [GO:0046974]; methyltransferase activity [GO:0008168]; p53 binding [GO:0002039]; protein-lysine N-methyltransferase activity [GO:0016279]; zinc ion binding [GO:0008270]                                                                                                                                                                                                                |
| Q9BYW2 | histone-lysine N-methyltransferase activity [GO:0018024]; histone methyltransferase activity (H3-K36 specific) [GO:0046975]                                                                                                                                                                                                                                                                                                                                                                                                                                              |
| Q9NQV7 | histone-lysine N-methyltransferase activity [GO:0018024]; metal ion binding [GO:0046872]; nucleic acid binding [GO:0003676]                                                                                                                                                                                                                                                                                                                                                                                                                                              |
| Q5TA45 | hydrolase activity [GO:0016787]                                                                                                                                                                                                                                                                                                                                                                                                                                                                                                                                          |
| Q9NPI6 | hydrolase activity [GO:0016787]; identical protein binding [GO:0042802]                                                                                                                                                                                                                                                                                                                                                                                                                                                                                                  |
| Q9BX68 | hydrolase activity [GO:0016787]; nucleotide binding [GO:0000166]                                                                                                                                                                                                                                                                                                                                                                                                                                                                                                         |
| Q9NQE9 | hydrolase activity [GO:0016787]; nucleotide binding [GO:0000166]                                                                                                                                                                                                                                                                                                                                                                                                                                                                                                         |
| P49773 | hydrolase activity [GO:0016787]; nucleotide binding [GO:0000166]; protein kinase C binding [GO:0005080]                                                                                                                                                                                                                                                                                                                                                                                                                                                                  |
| Q9UKR3 | hydrolase activity [GO:0016787]; serine-type endopeptidase activity [GO:0004252]                                                                                                                                                                                                                                                                                                                                                                                                                                                                                         |
| Q96EY9 | hydrolase activity [GO:0016787]; zinc ion binding [GO:0008270]                                                                                                                                                                                                                                                                                                                                                                                                                                                                                                           |
| Q93033 | hydrolase activity, acting on carbon-nitrogen (but not peptide) bonds, in cyclic amides [GO:0016812]                                                                                                                                                                                                                                                                                                                                                                                                                                                                     |
| Q9NRW3 | hydrolase activity, acting on carbon-nitrogen (but not peptide) bonds, in cyclic amidines [GO:0016814]; poly(A) RNA binding [GO:0044822]; zinc ion binding [GO:0008270]                                                                                                                                                                                                                                                                                                                                                                                                  |
| Q8WW27 | hydrolase activity, acting on carbon-nitrogen (but not peptide) bonds, in cyclic amidines [GO:0016814]; zinc ion binding [GO:0008270]                                                                                                                                                                                                                                                                                                                                                                                                                                    |
| Q96AK3 | hydrolase activity, acting on carbon-nitrogen (but not peptide) bonds, in cyclic amidines [GO:0016814]; zinc ion binding [GO:0008270]                                                                                                                                                                                                                                                                                                                                                                                                                                    |

|        |                                                                                                                                                                                                                                                                                                                                                                                                                                                                                 |
|--------|---------------------------------------------------------------------------------------------------------------------------------------------------------------------------------------------------------------------------------------------------------------------------------------------------------------------------------------------------------------------------------------------------------------------------------------------------------------------------------|
| Q53GS7 | identical protein binding [GO:0042802]                                                                                                                                                                                                                                                                                                                                                                                                                                          |
| Q8N157 | identical protein binding [GO:0042802]                                                                                                                                                                                                                                                                                                                                                                                                                                          |
| Q9UMS4 | identical protein binding [GO:0042802]; ligase activity [GO:0016874]; ubiquitin protein ligase activity [GO:0061630]; ubiquitin-ubiquitin ligase activity [GO:0034450]                                                                                                                                                                                                                                                                                                          |
| Q9HCM9 | identical protein binding [GO:0042802]; ligase activity [GO:0016874]; zinc ion binding [GO:0008270]                                                                                                                                                                                                                                                                                                                                                                             |
| P61626 | identical protein binding [GO:0042802]; lysozyme activity [GO:0003796]                                                                                                                                                                                                                                                                                                                                                                                                          |
| Q8IUH5 | identical protein binding [GO:0042802]; magnesium ion transmembrane transporter activity [GO:0015095]; palmitoyltransferase activity [GO:0016409]; protein-cysteine S-palmitoyltransferase activity [GO:0019706]; signal transducer activity [GO:0004871]; zinc ion binding [GO:0008270]                                                                                                                                                                                        |
| P07910 | identical protein binding [GO:0042802]; mRNA 3'-UTR binding [GO:0003730]; N6-methyladenosine-containing RNA binding [GO:1990247]; nucleosomal DNA binding [GO:0031492]; nucleotide binding [GO:0000166]; poly(A) RNA binding [GO:0044822]; poly(U) RNA binding [GO:0008266]; RNA binding [GO:0003723]; RNA polymerase II core promoter proximal region sequence-specific DNA binding [GO:0000978]; RNA polymerase II distal enhancer sequence-specific DNA binding [GO:0000980] |
| Q9NQ29 | identical protein binding [GO:0042802]; mRNA binding [GO:0003729]                                                                                                                                                                                                                                                                                                                                                                                                               |
| P51116 | identical protein binding [GO:0042802]; mRNA binding [GO:0003729]; poly(A) RNA binding [GO:0044822]; RNA binding [GO:0003723]                                                                                                                                                                                                                                                                                                                                                   |
| Q86SE5 | identical protein binding [GO:0042802]; nucleotide binding [GO:0000166]; poly(A) RNA binding [GO:0044822]                                                                                                                                                                                                                                                                                                                                                                       |
| P98175 | identical protein binding [GO:0042802]; nucleotide binding [GO:0000166]; poly(A) RNA binding [GO:0044822]; protein complex binding [GO:0032403]; zinc ion binding [GO:0008270]                                                                                                                                                                                                                                                                                                  |
| O43395 | identical protein binding [GO:0042802]; poly(A) RNA binding [GO:0044822]                                                                                                                                                                                                                                                                                                                                                                                                        |
| Q16637 | identical protein binding [GO:0042802]; RNA binding [GO:0003723]                                                                                                                                                                                                                                                                                                                                                                                                                |
| Q96F86 | identical protein binding [GO:0042802]; RNA binding [GO:0003723]                                                                                                                                                                                                                                                                                                                                                                                                                |
| Q9BV20 | identical protein binding [GO:0042802]; S-methyl-5-thioribose-1-phosphate isomerase activity [GO:0046523]                                                                                                                                                                                                                                                                                                                                                                       |
| Q676U5 | identical protein binding [GO:0042802]; ubiquitin-like protein transferase activity [GO:0019787]                                                                                                                                                                                                                                                                                                                                                                                |
| Q8WWQ0 | insulin receptor binding [GO:0005158]; lysine-acetylated histone binding [GO:0070577]                                                                                                                                                                                                                                                                                                                                                                                           |
| P35858 | insulin-like growth factor binding [GO:0005520]                                                                                                                                                                                                                                                                                                                                                                                                                                 |
| Q9NR96 | interleukin-1 receptor binding [GO:0005149]; siRNA binding [GO:0035197]; transmembrane signaling receptor activity [GO:0004888]                                                                                                                                                                                                                                                                                                                                                 |
| O60602 | interleukin-1 receptor binding [GO:0005149]; transmembrane signaling receptor activity [GO:0004888]                                                                                                                                                                                                                                                                                                                                                                             |
| Q8IWX8 | ion channel binding [GO:0044325]; poly(A) RNA binding [GO:0044822]                                                                                                                                                                                                                                                                                                                                                                                                              |
| Q5JPF3 | ion channel inhibitor activity [GO:0008200]                                                                                                                                                                                                                                                                                                                                                                                                                                     |
| Q6P2Q9 | K63-linked polyubiquitin binding [GO:0070530]; poly(A) RNA binding [GO:0044822]; pre-mRNA intronic binding [GO:0097157]; second spliceosomal transesterification activity [GO:0000386]; U1 snRNA binding [GO:0030619]; U2 snRNA binding [GO:0030620]; U5 snRNA binding [GO:0030623]; U6 snRNA binding [GO:0017070]                                                                                                                                                              |
| O95863 | kinase binding [GO:0019900]; metal ion binding [GO:0046872]; RNA polymerase II regulatory region sequence-specific DNA binding [GO:0000977]; transcriptional repressor activity, RNA polymerase II core promoter proximal region sequence-specific binding [GO:0001078]                                                                                                                                                                                                         |
| P08865 | laminin receptor activity [GO:0005055]; poly(A) RNA binding [GO:0044822]; ribosome binding [GO:0043022]; structural constituent of ribosome [GO:0003735]                                                                                                                                                                                                                                                                                                                        |
| P62829 | large ribosomal subunit rRNA binding [GO:0070180]; poly(A) RNA binding [GO:0044822]; structural constituent of ribosome [GO:0003735]                                                                                                                                                                                                                                                                                                                                            |
| Q58WW2 | ligand-dependent nuclear receptor transcription coactivator activity [GO:0030374]                                                                                                                                                                                                                                                                                                                                                                                               |
| Q9BQA1 | ligand-dependent nuclear receptor transcription coactivator activity [GO:0030374]                                                                                                                                                                                                                                                                                                                                                                                               |
| Q96PK6 | ligand-dependent nuclear receptor transcription coactivator activity [GO:0030374]; nucleotide binding [GO:0000166]; poly(A) RNA binding [GO:0044822]; protein binding, bridging [GO:0030674]; RNA binding [GO:0003723]; RNA polymerase II transcription cofactor activity [GO:0001104]                                                                                                                                                                                          |
| Q9Y606 | ligand-dependent nuclear receptor transcription coactivator activity [GO:0030374]; poly(A) RNA binding [GO:0044822]; pseudouridine synthase activity [GO:0009982]; pseudouridylate synthase activity [GO:0004730]                                                                                                                                                                                                                                                               |

|        |                                                                                                                                                                                                                   |
|--------|-------------------------------------------------------------------------------------------------------------------------------------------------------------------------------------------------------------------|
| Q9HD15 | ligand-dependent nuclear receptor transcription coactivator activity [GO:0030374]; transcription coactivator activity [GO:0003713]                                                                                |
| O95628 | ligase activity [GO:0016874]; nucleotide binding [GO:0000166]; poly(A) RNA binding [GO:0044822]; ubiquitin-protein transferase activity [GO:0004842]; zinc ion binding [GO:0008270]                               |
| Q5U5Q3 | ligase activity [GO:0016874]; poly(A) RNA binding [GO:0044822]; zinc ion binding [GO:0008270]                                                                                                                     |
| Q9H000 | ligase activity [GO:0016874]; poly(A) RNA binding [GO:0044822]; zinc ion binding [GO:0008270]                                                                                                                     |
| Q9Y577 | ligase activity [GO:0016874]; protein binding, bridging [GO:0030674]; ubiquitin-protein transferase activity [GO:0004842]; zinc ion binding [GO:0008270]                                                          |
| Q8IYU2 | ligase activity [GO:0016874]; Rab GTPase binding [GO:0017137]; Rac GTPase binding [GO:0048365]; ubiquitin-protein transferase activity [GO:0004842]                                                               |
| O95071 | ligase activity [GO:0016874]; RNA binding [GO:0003723]; ubiquitin-protein transferase activity [GO:0004842]; ubiquitin-ubiquitin ligase activity [GO:0034450]; zinc ion binding [GO:0008270]                      |
| Q96AX9 | ligase activity [GO:0016874]; signal transducer activity [GO:0004871]; ubiquitin protein ligase activity [GO:0061630]; ubiquitin-protein transferase activity [GO:0004842]; zinc ion binding [GO:0008270]         |
| Q6ZNA4 | ligase activity [GO:0016874]; SUMO polymer binding [GO:0032184]; ubiquitin protein ligase activity [GO:0061630]; zinc ion binding [GO:0008270]                                                                    |
| Q9NVW2 | ligase activity [GO:0016874]; transcription corepressor activity [GO:0003714]; ubiquitin protein ligase activity [GO:0061630]; ubiquitin-protein transferase activity [GO:0004842]; zinc ion binding [GO:0008270] |
| Q9Y297 | ligase activity [GO:0016874]; ubiquitin protein ligase activity [GO:0061630]                                                                                                                                      |
| O43567 | ligase activity [GO:0016874]; ubiquitin protein ligase activity [GO:0061630]; ubiquitin-protein transferase activity [GO:0004842]; zinc ion binding [GO:0008270]                                                  |
| Q9Y4L5 | ligase activity [GO:0016874]; ubiquitin protein ligase activity [GO:0061630]; ubiquitin-protein transferase activity [GO:0004842]; zinc ion binding [GO:0008270]                                                  |
| Q8NC42 | ligase activity [GO:0016874]; ubiquitin protein ligase activity [GO:0061630]; zinc ion binding [GO:0008270]                                                                                                       |
| Q8NHY2 | ligase activity [GO:0016874]; ubiquitin protein ligase activity [GO:0061630]; zinc ion binding [GO:0008270]                                                                                                       |
| Q8TEB7 | ligase activity [GO:0016874]; ubiquitin protein ligase activity [GO:0061630]; zinc ion binding [GO:0008270]                                                                                                       |
| Q96F44 | ligase activity [GO:0016874]; ubiquitin protein ligase activity [GO:0061630]; zinc ion binding [GO:0008270]                                                                                                       |
| Q9BV68 | ligase activity [GO:0016874]; ubiquitin protein ligase activity [GO:0061630]; zinc ion binding [GO:0008270]                                                                                                       |
| Q6Q0C0 | ligase activity [GO:0016874]; ubiquitin-protein transferase activity [GO:0004842]; zinc ion binding [GO:0008270]                                                                                                  |
| Q86XS8 | ligase activity [GO:0016874]; ubiquitin-protein transferase activity [GO:0004842]; zinc ion binding [GO:0008270]                                                                                                  |
| Q86YT6 | ligase activity [GO:0016874]; ubiquitin-protein transferase activity [GO:0004842]; zinc ion binding [GO:0008270]                                                                                                  |
| Q9H0F5 | ligase activity [GO:0016874]; ubiquitin-protein transferase activity [GO:0004842]; zinc ion binding [GO:0008270]                                                                                                  |
| Q9H6Y7 | ligase activity [GO:0016874]; ubiquitin-protein transferase activity [GO:0004842]; zinc ion binding [GO:0008270]                                                                                                  |
| Q9P0P0 | ligase activity [GO:0016874]; ubiquitin-protein transferase activity [GO:0004842]; zinc ion binding [GO:0008270]                                                                                                  |
| Q13064 | ligase activity [GO:0016874]; zinc ion binding [GO:0008270]                                                                                                                                                       |
| Q13434 | ligase activity [GO:0016874]; zinc ion binding [GO:0008270]                                                                                                                                                       |
| Q8WVZ7 | ligase activity [GO:0016874]; zinc ion binding [GO:0008270]                                                                                                                                                       |
| Q00341 | lipid binding [GO:0008289]; poly(A) RNA binding [GO:0044822]                                                                                                                                                      |
| Q7L0X0 | lipopolysaccharide binding [GO:0001530]                                                                                                                                                                           |
| O00206 | lipopolysaccharide binding [GO:0001530]; lipopolysaccharide receptor activity [GO:0001875]; receptor activity [GO:0004872]; transmembrane signaling receptor activity [GO:0004888]                                |
| Q9H9E1 | low-density lipoprotein particle binding [GO:0030169]; transcription cofactor activity [GO:0003712]                                                                                                               |
| Q8NCE0 | lyase activity [GO:0016829]; nucleic acid binding [GO:0003676]; tRNA-intron endonuclease activity [GO:0000213]                                                                                                    |

|        |                                                                                                                                                                                                                                                                                                                                                                                                                                                             |
|--------|-------------------------------------------------------------------------------------------------------------------------------------------------------------------------------------------------------------------------------------------------------------------------------------------------------------------------------------------------------------------------------------------------------------------------------------------------------------|
| Q9BSV6 | lyase activity [GO:0016829]; nucleic acid binding [GO:0003676]; tRNA-intron endonuclease activity [GO:0000213]                                                                                                                                                                                                                                                                                                                                              |
| O75951 | lysozyme activity [GO:0003796]                                                                                                                                                                                                                                                                                                                                                                                                                              |
| Q6UWQ5 | lysozyme activity [GO:0003796]                                                                                                                                                                                                                                                                                                                                                                                                                              |
| Q7Z4W2 | lysozyme activity [GO:0003796]                                                                                                                                                                                                                                                                                                                                                                                                                              |
| Q8IXA5 | lysozyme activity [GO:0003796]                                                                                                                                                                                                                                                                                                                                                                                                                              |
| Q96KX0 | lysozyme activity [GO:0003796]                                                                                                                                                                                                                                                                                                                                                                                                                              |
| Q96QH8 | lysozyme activity [GO:0003796]                                                                                                                                                                                                                                                                                                                                                                                                                              |
| Q96C86 | m7G(5')pppN diphosphatase activity [GO:0050072]; RNA 7-methylguanosine cap binding [GO:0000340]                                                                                                                                                                                                                                                                                                                                                             |
| O60930 | magnesium ion binding [GO:0000287]; nucleic acid binding [GO:0003676]; ribonuclease activity [GO:0004540]; RNA binding [GO:0003723]; RNA-DNA hybrid ribonuclease activity [GO:0004523]                                                                                                                                                                                                                                                                      |
| Q8IUH4 | magnesium ion transmembrane transporter activity [GO:0015095]; palmitoyltransferase activity [GO:0016409]; protein-cysteine S-palmitoyltransferase activity [GO:0019706]; signal transducer activity [GO:0004871]; zinc ion binding [GO:0008270]                                                                                                                                                                                                            |
| A7XYQ1 | metal ion binding [GO:0046872]                                                                                                                                                                                                                                                                                                                                                                                                                              |
| Q8IWT0 | metal ion binding [GO:0046872]                                                                                                                                                                                                                                                                                                                                                                                                                              |
| Q8WW33 | metal ion binding [GO:0046872]                                                                                                                                                                                                                                                                                                                                                                                                                              |
| Q96B70 | metal ion binding [GO:0046872]                                                                                                                                                                                                                                                                                                                                                                                                                              |
| Q96P53 | metal ion binding [GO:0046872]                                                                                                                                                                                                                                                                                                                                                                                                                              |
| Q9BXT4 | metal ion binding [GO:0046872]                                                                                                                                                                                                                                                                                                                                                                                                                              |
| Q9H1H1 | metal ion binding [GO:0046872]                                                                                                                                                                                                                                                                                                                                                                                                                              |
| Q9P2S6 | metal ion binding [GO:0046872]                                                                                                                                                                                                                                                                                                                                                                                                                              |
| Q7Z2T5 | metal ion binding [GO:0046872]; methyltransferase activity [GO:0008168]; poly(A) RNA binding [GO:0044822]; tRNA binding [GO:0000049]                                                                                                                                                                                                                                                                                                                        |
| Q9NQX1 | metal ion binding [GO:0046872]; methyltransferase activity [GO:0008168]; repressing transcription factor binding [GO:0070491]; RNA polymerase II core promoter proximal region sequence-specific DNA binding [GO:0000978]; sequence-specific DNA binding [GO:0043565]; transcriptional repressor activity, RNA polymerase II core promoter proximal region sequence-specific binding [GO:0001078]; transcription regulatory region DNA binding [GO:0044212] |
| Q9H4Q4 | metal ion binding [GO:0046872]; methyltransferase activity [GO:0008168]; RNA polymerase II regulatory region sequence-specific DNA binding [GO:0000977]                                                                                                                                                                                                                                                                                                     |
| P57071 | metal ion binding [GO:0046872]; methyltransferase activity [GO:0008168]; RNA polymerase II regulatory region sequence-specific DNA binding [GO:0000977]; transcription factor activity, sequence-specific DNA binding [GO:0003700]                                                                                                                                                                                                                          |
| Q9BZB8 | metal ion binding [GO:0046872]; mRNA 3'-UTR AU-rich region binding [GO:0035925]; mRNA 3'-UTR binding [GO:0003730]; nucleotide binding [GO:0000166]; ribosome binding [GO:0043022]; translation factor activity, RNA binding [GO:0008135]; translation repressor activity, nucleic acid binding [GO:0000900]                                                                                                                                                 |
| O95453 | metal ion binding [GO:0046872]; mRNA 3'-UTR binding [GO:0003730]; nuclease activity [GO:0004518]; nucleotide binding [GO:0000166]; poly(A) RNA binding [GO:0044822]; poly(A)-specific ribonuclease activity [GO:0004535]; protein kinase binding [GO:0019901]                                                                                                                                                                                               |
| Q8NCW5 | metal ion binding [GO:0046872]; NADHX epimerase activity [GO:0052856]; NADPHX epimerase activity [GO:0052857]; nucleotide binding [GO:0000166]                                                                                                                                                                                                                                                                                                              |
| C9JN71 | metal ion binding [GO:0046872]; nucleic acid binding [GO:0003676]                                                                                                                                                                                                                                                                                                                                                                                           |
| P0DKX0 | metal ion binding [GO:0046872]; nucleic acid binding [GO:0003676]                                                                                                                                                                                                                                                                                                                                                                                           |
| P98169 | metal ion binding [GO:0046872]; nucleic acid binding [GO:0003676]                                                                                                                                                                                                                                                                                                                                                                                           |
| Q6ZMS4 | metal ion binding [GO:0046872]; nucleic acid binding [GO:0003676]                                                                                                                                                                                                                                                                                                                                                                                           |
| Q8NB50 | metal ion binding [GO:0046872]; nucleic acid binding [GO:0003676]                                                                                                                                                                                                                                                                                                                                                                                           |
| Q96SL8 | metal ion binding [GO:0046872]; nucleic acid binding [GO:0003676]; receptor tyrosine kinase binding [GO:0030971]                                                                                                                                                                                                                                                                                                                                            |
| B7Z6K7 | metal ion binding [GO:0046872]; nucleic acid binding [GO:0003676]; transcription factor activity, sequence-specific DNA binding [GO:0003700]                                                                                                                                                                                                                                                                                                                |

|        |                                                                                                                                                                                                                                                                                                                                                                                                                                                                                                                                                                         |
|--------|-------------------------------------------------------------------------------------------------------------------------------------------------------------------------------------------------------------------------------------------------------------------------------------------------------------------------------------------------------------------------------------------------------------------------------------------------------------------------------------------------------------------------------------------------------------------------|
| Q52M93 | metal ion binding [GO:0046872]; nucleic acid binding [GO:0003676]; transcription factor activity, sequence-specific DNA binding [GO:0003700]                                                                                                                                                                                                                                                                                                                                                                                                                            |
| Q6P3V2 | metal ion binding [GO:0046872]; nucleic acid binding [GO:0003676]; transcription factor activity, sequence-specific DNA binding [GO:0003700]                                                                                                                                                                                                                                                                                                                                                                                                                            |
| Q6PDB4 | metal ion binding [GO:0046872]; nucleic acid binding [GO:0003676]; transcription factor activity, sequence-specific DNA binding [GO:0003700]                                                                                                                                                                                                                                                                                                                                                                                                                            |
| Q5T8P6 | metal ion binding [GO:0046872]; nucleotide binding [GO:0000166]; poly(A) RNA binding [GO:0044822]                                                                                                                                                                                                                                                                                                                                                                                                                                                                       |
| Q9P2N5 | metal ion binding [GO:0046872]; nucleotide binding [GO:0000166]; poly(A) RNA binding [GO:0044822]                                                                                                                                                                                                                                                                                                                                                                                                                                                                       |
| Q5T8I9 | metal ion binding [GO:0046872]; O-methyltransferase activity [GO:0008171]; RNA binding [GO:0003723]; RNA methyltransferase activity [GO:0008173]                                                                                                                                                                                                                                                                                                                                                                                                                        |
| Q9P2R3 | metal ion binding [GO:0046872]; phosphatidylinositol phosphate binding [GO:1901981]; Rab GTPase binding [GO:0017137]                                                                                                                                                                                                                                                                                                                                                                                                                                                    |
| O60346 | metal ion binding [GO:0046872]; phosphoprotein phosphatase activity [GO:0004721]                                                                                                                                                                                                                                                                                                                                                                                                                                                                                        |
| Q5VZF2 | metal ion binding [GO:0046872]; poly(A) RNA binding [GO:0044822]                                                                                                                                                                                                                                                                                                                                                                                                                                                                                                        |
| Q9H2Y7 | metal ion binding [GO:0046872]; poly(A) RNA binding [GO:0044822]                                                                                                                                                                                                                                                                                                                                                                                                                                                                                                        |
| Q9NUK0 | metal ion binding [GO:0046872]; poly(A) RNA binding [GO:0044822]                                                                                                                                                                                                                                                                                                                                                                                                                                                                                                        |
| Q9UKJ3 | metal ion binding [GO:0046872]; poly(A) RNA binding [GO:0044822]                                                                                                                                                                                                                                                                                                                                                                                                                                                                                                        |
| Q9UK59 | metal ion binding [GO:0046872]; poly(A) RNA binding [GO:0044822]; RNA lariat debranching enzyme activity [GO:0008419]                                                                                                                                                                                                                                                                                                                                                                                                                                                   |
| P61513 | metal ion binding [GO:0046872]; poly(A) RNA binding [GO:0044822]; structural constituent of ribosome [GO:0003735]                                                                                                                                                                                                                                                                                                                                                                                                                                                       |
| P62979 | metal ion binding [GO:0046872]; poly(A) RNA binding [GO:0044822]; structural constituent of ribosome [GO:0003735]                                                                                                                                                                                                                                                                                                                                                                                                                                                       |
| Q9NXH9 | metal ion binding [GO:0046872]; poly(A) RNA binding [GO:0044822]; tRNA (guanine-N2-)-methyltransferase activity [GO:0004809]; tRNA binding [GO:0000049]                                                                                                                                                                                                                                                                                                                                                                                                                 |
| P28698 | metal ion binding [GO:0046872]; protein homodimerization activity [GO:0042803]; RNA polymerase II core promoter proximal region sequence-specific DNA binding [GO:0000978]; transcriptional activator activity, RNA polymerase II core promoter proximal region sequence-specific binding [GO:0001077]; transcriptional repressor activity, RNA polymerase II core promoter proximal region sequence-specific binding [GO:0001078]; transcription factor activity, sequence-specific DNA binding [GO:0003700]; transcription regulatory region DNA binding [GO:0044212] |
| Q9BXR0 | metal ion binding [GO:0046872]; queuine tRNA-ribosyltransferase activity [GO:0008479]                                                                                                                                                                                                                                                                                                                                                                                                                                                                                   |
| O75792 | metal ion binding [GO:0046872]; ribonuclease activity [GO:0004540]; RNA binding [GO:0003723]; RNA-DNA hybrid ribonuclease activity [GO:0004523]                                                                                                                                                                                                                                                                                                                                                                                                                         |
| Q9H633 | metal ion binding [GO:0046872]; ribonuclease P activity [GO:0004526]                                                                                                                                                                                                                                                                                                                                                                                                                                                                                                    |
| A6NMK7 | metal ion binding [GO:0046872]; RNA binding [GO:0003723]                                                                                                                                                                                                                                                                                                                                                                                                                                                                                                                |
| P61927 | metal ion binding [GO:0046872]; RNA binding [GO:0003723]; rRNA binding [GO:0019843]; structural constituent of ribosome [GO:0003735]                                                                                                                                                                                                                                                                                                                                                                                                                                    |
| Q9BUB4 | metal ion binding [GO:0046872]; RNA binding [GO:0003723]; tRNA-specific adenosine deaminase activity [GO:0008251]                                                                                                                                                                                                                                                                                                                                                                                                                                                       |
| P10155 | metal ion binding [GO:0046872]; RNA binding [GO:0003723]; U2 snRNA binding [GO:0030620]                                                                                                                                                                                                                                                                                                                                                                                                                                                                                 |
| P29083 | metal ion binding [GO:0046872]; RNA polymerase II core binding [GO:0000993]; sequence-specific DNA binding [GO:0043565]; TFIIF-class transcription factor binding [GO:0001097]; transcription factor activity, core RNA polymerase II binding [GO:0000991]; transcription factor activity, RNA polymerase II transcription factor binding [GO:0001076]                                                                                                                                                                                                                  |
| A6NK75 | metal ion binding [GO:0046872]; RNA polymerase II core promoter proximal region sequence-specific DNA binding [GO:0000978]                                                                                                                                                                                                                                                                                                                                                                                                                                              |
| A6NP11 | metal ion binding [GO:0046872]; RNA polymerase II core promoter proximal region sequence-specific DNA binding [GO:0000978]                                                                                                                                                                                                                                                                                                                                                                                                                                              |
| A8MTY0 | metal ion binding [GO:0046872]; RNA polymerase II core promoter proximal region sequence-specific DNA binding [GO:0000978]                                                                                                                                                                                                                                                                                                                                                                                                                                              |
| B4DXR9 | metal ion binding [GO:0046872]; RNA polymerase II core promoter proximal region sequence-specific DNA binding [GO:0000978]                                                                                                                                                                                                                                                                                                                                                                                                                                              |
| O43296 | metal ion binding [GO:0046872]; RNA polymerase II core promoter proximal region sequence-specific                                                                                                                                                                                                                                                                                                                                                                                                                                                                       |



|        |                                                                                                                                                                                                                                                                                                                                                                                                                                                                                                |
|--------|------------------------------------------------------------------------------------------------------------------------------------------------------------------------------------------------------------------------------------------------------------------------------------------------------------------------------------------------------------------------------------------------------------------------------------------------------------------------------------------------|
|        | DNA binding [GO:0000978]                                                                                                                                                                                                                                                                                                                                                                                                                                                                       |
| O75373 | metal ion binding [GO:0046872]; RNA polymerase II core promoter proximal region sequence-specific DNA binding [GO:0000978]                                                                                                                                                                                                                                                                                                                                                                     |
| O95780 | metal ion binding [GO:0046872]; RNA polymerase II core promoter proximal region sequence-specific DNA binding [GO:0000978]                                                                                                                                                                                                                                                                                                                                                                     |
| P17019 | metal ion binding [GO:0046872]; RNA polymerase II core promoter proximal region sequence-specific DNA binding [GO:0000978]                                                                                                                                                                                                                                                                                                                                                                     |
| Q08ER8 | metal ion binding [GO:0046872]; RNA polymerase II core promoter proximal region sequence-specific DNA binding [GO:0000978]                                                                                                                                                                                                                                                                                                                                                                     |
| Q14592 | metal ion binding [GO:0046872]; RNA polymerase II core promoter proximal region sequence-specific DNA binding [GO:0000978]                                                                                                                                                                                                                                                                                                                                                                     |
| Q14593 | metal ion binding [GO:0046872]; RNA polymerase II core promoter proximal region sequence-specific DNA binding [GO:0000978]                                                                                                                                                                                                                                                                                                                                                                     |
| Q15928 | metal ion binding [GO:0046872]; RNA polymerase II core promoter proximal region sequence-specific DNA binding [GO:0000978]                                                                                                                                                                                                                                                                                                                                                                     |
| Q3SXZ3 | metal ion binding [GO:0046872]; RNA polymerase II core promoter proximal region sequence-specific DNA binding [GO:0000978]                                                                                                                                                                                                                                                                                                                                                                     |
| Q5CZA5 | metal ion binding [GO:0046872]; RNA polymerase II core promoter proximal region sequence-specific DNA binding [GO:0000978]                                                                                                                                                                                                                                                                                                                                                                     |
| Q5JVG8 | metal ion binding [GO:0046872]; RNA polymerase II core promoter proximal region sequence-specific DNA binding [GO:0000978]                                                                                                                                                                                                                                                                                                                                                                     |
| Q68DY1 | metal ion binding [GO:0046872]; RNA polymerase II core promoter proximal region sequence-specific DNA binding [GO:0000978]                                                                                                                                                                                                                                                                                                                                                                     |
| Q6ZMV8 | metal ion binding [GO:0046872]; RNA polymerase II core promoter proximal region sequence-specific DNA binding [GO:0000978]                                                                                                                                                                                                                                                                                                                                                                     |
| Q6ZN08 | metal ion binding [GO:0046872]; RNA polymerase II core promoter proximal region sequence-specific DNA binding [GO:0000978]                                                                                                                                                                                                                                                                                                                                                                     |
| Q8IYN0 | metal ion binding [GO:0046872]; RNA polymerase II core promoter proximal region sequence-specific DNA binding [GO:0000978]                                                                                                                                                                                                                                                                                                                                                                     |
| Q8IYX0 | metal ion binding [GO:0046872]; RNA polymerase II core promoter proximal region sequence-specific DNA binding [GO:0000978]                                                                                                                                                                                                                                                                                                                                                                     |
| Q8N3J9 | metal ion binding [GO:0046872]; RNA polymerase II core promoter proximal region sequence-specific DNA binding [GO:0000978]                                                                                                                                                                                                                                                                                                                                                                     |
| Q8N7Q3 | metal ion binding [GO:0046872]; RNA polymerase II core promoter proximal region sequence-specific DNA binding [GO:0000978]                                                                                                                                                                                                                                                                                                                                                                     |
| Q8NEM1 | metal ion binding [GO:0046872]; RNA polymerase II core promoter proximal region sequence-specific DNA binding [GO:0000978]                                                                                                                                                                                                                                                                                                                                                                     |
| Q8TB69 | metal ion binding [GO:0046872]; RNA polymerase II core promoter proximal region sequence-specific DNA binding [GO:0000978]                                                                                                                                                                                                                                                                                                                                                                     |
| Q96H40 | metal ion binding [GO:0046872]; RNA polymerase II core promoter proximal region sequence-specific DNA binding [GO:0000978]                                                                                                                                                                                                                                                                                                                                                                     |
| Q96JC4 | metal ion binding [GO:0046872]; RNA polymerase II core promoter proximal region sequence-specific DNA binding [GO:0000978]                                                                                                                                                                                                                                                                                                                                                                     |
| Q96N38 | metal ion binding [GO:0046872]; RNA polymerase II core promoter proximal region sequence-specific DNA binding [GO:0000978]                                                                                                                                                                                                                                                                                                                                                                     |
| Q9H8G1 | metal ion binding [GO:0046872]; RNA polymerase II core promoter proximal region sequence-specific DNA binding [GO:0000978]                                                                                                                                                                                                                                                                                                                                                                     |
| Q9P255 | metal ion binding [GO:0046872]; RNA polymerase II core promoter proximal region sequence-specific DNA binding [GO:0000978]                                                                                                                                                                                                                                                                                                                                                                     |
| Q9H116 | metal ion binding [GO:0046872]; RNA polymerase II core promoter proximal region sequence-specific DNA binding [GO:0000978]; RNA polymerase II distal enhancer sequence-specific DNA binding [GO:0000980]; sequence-specific DNA binding [GO:0043565]; transcriptional repressor activity, RNA polymerase II core promoter proximal region sequence-specific binding [GO:0001078]; transcriptional repressor activity, RNA polymerase II distal enhancer sequence-specific binding [GO:0001206] |
| O60481 | metal ion binding [GO:0046872]; RNA polymerase II core promoter proximal region sequence-specific DNA binding [GO:0000978]; sequence-specific DNA binding [GO:0043565]; transcriptional activator activity, RNA polymerase II core promoter proximal region sequence-specific binding [GO:0001077]; transcription factor activity, sequence-specific DNA binding [GO:0003700]                                                                                                                  |

[illegible]

|        |                                                                                                                                                                                           |
|--------|-------------------------------------------------------------------------------------------------------------------------------------------------------------------------------------------|
| Q96HQ0 | metal ion binding [GO:0046872]; RNA polymerase II regulatory region sequence-specific DNA binding [GO:0000977]; transcription factor activity, sequence-specific DNA binding [GO:0003700] |
| Q96ND8 | metal ion binding [GO:0046872]; RNA polymerase II regulatory region sequence-specific DNA binding [GO:0000977]; transcription factor activity, sequence-specific DNA binding [GO:0003700] |
| Q96NI8 | metal ion binding [GO:0046872]; RNA polymerase II regulatory region sequence-specific DNA binding [GO:0000977]; transcription factor activity, sequence-specific DNA binding [GO:0003700] |
| Q9HCX3 | metal ion binding [GO:0046872]; RNA polymerase II regulatory region sequence-specific DNA binding [GO:0000977]; transcription factor activity, sequence-specific DNA binding [GO:0003700] |
| Q9NXT0 | metal ion binding [GO:0046872]; RNA polymerase II regulatory region sequence-specific DNA binding [GO:0000977]; transcription factor activity, sequence-specific DNA binding [GO:0003700] |
| Q9Y2P7 | metal ion binding [GO:0046872]; RNA polymerase II regulatory region sequence-specific DNA binding [GO:0000977]; transcription factor activity, sequence-specific DNA binding [GO:0003700] |
| O00370 | metal ion binding [GO:0046872]; RNA-directed DNA polymerase activity [GO:0003964]; Type II site-specific deoxyribonuclease activity [GO:0009036]                                          |
| P05156 | metal ion binding [GO:0046872]; scavenger receptor activity [GO:0005044]; serine-type endopeptidase activity [GO:0004252]                                                                 |
| O15391 | metal ion binding [GO:0046872]; sequence-specific DNA binding [GO:0043565]                                                                                                                |
| Q96MM3 | metal ion binding [GO:0046872]; sequence-specific DNA binding [GO:0043565]; transcription factor activity, sequence-specific DNA binding [GO:0003700]                                     |
| Q96SZ4 | metal ion binding [GO:0046872]; sequence-specific DNA binding [GO:0043565]; transcription factor activity, sequence-specific DNA binding [GO:0003700]                                     |
| P06681 | metal ion binding [GO:0046872]; serine-type endopeptidase activity [GO:0004252]                                                                                                           |
| P07477 | metal ion binding [GO:0046872]; serine-type endopeptidase activity [GO:0004252]                                                                                                           |
| Q7RTY7 | metal ion binding [GO:0046872]; serine-type endopeptidase activity [GO:0004252]                                                                                                           |
| Q7RTZ1 | metal ion binding [GO:0046872]; serine-type endopeptidase activity [GO:0004252]                                                                                                           |
| Q8NHM4 | metal ion binding [GO:0046872]; serine-type endopeptidase activity [GO:0004252]                                                                                                           |
| Q9UNI1 | metal ion binding [GO:0046872]; serine-type endopeptidase activity [GO:0004252]                                                                                                           |
| Q9Y5K2 | metal ion binding [GO:0046872]; serine-type endopeptidase activity [GO:0004252]; serine-type peptidase activity [GO:0008236]                                                              |
| A6NKH3 | metal ion binding [GO:0046872]; structural constituent of ribosome [GO:0003735]                                                                                                           |
| Q8TBZ8 | metal ion binding [GO:0046872]; transcription factor activity, sequence-specific DNA binding [GO:0003700]; transcription regulatory region DNA binding [GO:0044212]                       |
| Q5TYW1 | metal ion binding [GO:0046872]; transcription regulatory region sequence-specific DNA binding [GO:0000976]                                                                                |
| Q9NUP7 | metal ion binding [GO:0046872]; tRNA methyltransferase activity [GO:0008175]                                                                                                              |
| Q96DP5 | methionyl-tRNA formyltransferase activity [GO:0004479]                                                                                                                                    |
| Q99549 | methylated histone binding [GO:0035064]                                                                                                                                                   |
| Q6IPR3 | methyltransferase activity [GO:0008168]                                                                                                                                                   |
| Q6PF06 | methyltransferase activity [GO:0008168]                                                                                                                                                   |
| Q8N3J2 | methyltransferase activity [GO:0008168]; nucleic acid binding [GO:0003676]                                                                                                                |
| Q5T280 | methyltransferase activity [GO:0008168]; poly(A) RNA binding [GO:0044822]                                                                                                                 |
| Q7L0Y3 | methyltransferase activity [GO:0008168]; poly(A) RNA binding [GO:0044822]                                                                                                                 |
| Q8TBZ6 | methyltransferase activity [GO:0008168]; poly(A) RNA binding [GO:0044822]; tRNA binding [GO:0000049]                                                                                      |
| A6NHQ2 | methyltransferase activity [GO:0008168]; RNA binding [GO:0003723]                                                                                                                         |
| Q9BTF0 | methyltransferase activity [GO:0008168]; RNA binding [GO:0003723]                                                                                                                         |
| Q9BV44 | methyltransferase activity [GO:0008168]; RNA binding [GO:0003723]                                                                                                                         |
| Q7Z4G4 | methyltransferase activity [GO:0008168]; tRNA binding [GO:0000049]                                                                                                                        |
| P04437 | MHC protein binding [GO:0042287]; peptide antigen binding [GO:0042605]                                                                                                                    |
| O14576 | microtubule binding [GO:0008017]; microtubule motor activity [GO:0003777]; motor activity [GO:0003774]; spectrin binding [GO:0030507]                                                     |
| Q9Y3A5 | microtubule binding [GO:0008017]; poly(A) RNA binding [GO:0044822]; ribosome binding                                                                                                      |

|        |                                                                                                                                                                                                                                                                                                                                                                             |
|--------|-----------------------------------------------------------------------------------------------------------------------------------------------------------------------------------------------------------------------------------------------------------------------------------------------------------------------------------------------------------------------------|
|        | [GO:0043022]; rRNA binding [GO:0019843]                                                                                                                                                                                                                                                                                                                                     |
| Q9BVA0 | microtubule binding [GO:0008017]; protein heterodimerization activity [GO:0046982]                                                                                                                                                                                                                                                                                          |
| P78406 | microtubule binding [GO:0008017]; RNA binding [GO:0003723]                                                                                                                                                                                                                                                                                                                  |
| O95834 | microtubule binding [GO:0008017]; tubulin binding [GO:0015631]                                                                                                                                                                                                                                                                                                              |
| Q13409 | microtubule motor activity [GO:0003777]                                                                                                                                                                                                                                                                                                                                     |
| Q9BWF3 | miRNA binding [GO:0035198]; mRNA 3'-UTR binding [GO:0003730]; mRNA binding [GO:0003729]; nucleotide binding [GO:0000166]; poly(A) RNA binding [GO:0044822]; pre-mRNA intronic binding [GO:0097157]; pre-mRNA intronic pyrimidine-rich binding [GO:0097158]; RNA binding [GO:0003723]; zinc ion binding [GO:0008270]                                                         |
| P00748 | misfolded protein binding [GO:0051787]; serine-type aminopeptidase activity [GO:0070009]; serine-type endopeptidase activity [GO:0004252]                                                                                                                                                                                                                                   |
| Q9HCE5 | mRNA (2'-O-methyladenosine-N6-)-methyltransferase activity [GO:0016422]; RNA binding [GO:0003723]                                                                                                                                                                                                                                                                           |
| Q86U44 | mRNA (2'-O-methyladenosine-N6-)-methyltransferase activity [GO:0016422]; RNA binding [GO:0003723]; RNA methyltransferase activity [GO:0008173]                                                                                                                                                                                                                              |
| O43148 | mRNA (guanine-N7-)-methyltransferase activity [GO:0004482]; RNA binding [GO:0003723]                                                                                                                                                                                                                                                                                        |
| Q8IYT2 | mRNA (nucleoside-2'-O-)-methyltransferase activity [GO:0004483]                                                                                                                                                                                                                                                                                                             |
| Q8N1G2 | mRNA (nucleoside-2'-O-)-methyltransferase activity [GO:0004483]; nucleic acid binding [GO:0003676]                                                                                                                                                                                                                                                                          |
| Q8NE35 | mRNA 3'-UTR AU-rich region binding [GO:0035925]; mRNA 3'-UTR binding [GO:0003730]; nucleotide binding [GO:0000166]; poly(A) RNA binding [GO:0044822]; ribosome binding [GO:0043022]; RNA binding [GO:0003723]; RNA stem-loop binding [GO:0035613]; translation factor activity, RNA binding [GO:0008135]; translation repressor activity, nucleic acid binding [GO:0000900] |
| Q9NZI8 | mRNA 3'-UTR binding [GO:0003730]; mRNA 5'-UTR binding [GO:0048027]; mRNA binding [GO:0003729]; nucleotide binding [GO:0000166]; poly(A) RNA binding [GO:0044822]; translation regulator activity [GO:0045182]                                                                                                                                                               |
| O00425 | mRNA 3'-UTR binding [GO:0003730]; mRNA 5'-UTR binding [GO:0048027]; nucleotide binding [GO:0000166]; poly(A) RNA binding [GO:0044822]; RNA binding [GO:0003723]; translation regulator activity [GO:0045182]                                                                                                                                                                |
| Q9Y6M1 | mRNA 3'-UTR binding [GO:0003730]; mRNA 5'-UTR binding [GO:0048027]; nucleotide binding [GO:0000166]; poly(A) RNA binding [GO:0044822]; translation regulator activity [GO:0045182]                                                                                                                                                                                          |
| Q9H0Z9 | mRNA 3'-UTR binding [GO:0003730]; mRNA binding [GO:0003729]; nucleotide binding [GO:0000166]; poly(A) RNA binding [GO:0044822]                                                                                                                                                                                                                                              |
| Q6XE24 | mRNA 3'-UTR binding [GO:0003730]; nucleotide binding [GO:0000166]                                                                                                                                                                                                                                                                                                           |
| Q9BX46 | mRNA 3'-UTR binding [GO:0003730]; nucleotide binding [GO:0000166]                                                                                                                                                                                                                                                                                                           |
| Q12926 | mRNA 3'-UTR binding [GO:0003730]; nucleotide binding [GO:0000166]; poly(A) RNA binding [GO:0044822]                                                                                                                                                                                                                                                                         |
| Q17RY0 | mRNA 3'-UTR binding [GO:0003730]; nucleotide binding [GO:0000166]; poly(A) RNA binding [GO:0044822]; ribosome binding [GO:0043022]; translation factor activity, RNA binding [GO:0008135]; translation repressor activity, nucleic acid binding [GO:0000900]                                                                                                                |
| Q15287 | mRNA 3'-UTR binding [GO:0003730]; nucleotide binding [GO:0000166]; poly(A) RNA binding [GO:0044822]; RNA binding [GO:0003723]                                                                                                                                                                                                                                               |
| Q14011 | mRNA 3'-UTR binding [GO:0003730]; nucleotide binding [GO:0000166]; poly(A) RNA binding [GO:0044822]; small ribosomal subunit rRNA binding [GO:0070181]; translation repressor activity [GO:0030371]                                                                                                                                                                         |
| Q92904 | mRNA 3'-UTR binding [GO:0003730]; nucleotide binding [GO:0000166]; RNA binding [GO:0003723]; translation activator activity [GO:0008494]                                                                                                                                                                                                                                    |
| Q14671 | mRNA 3'-UTR binding [GO:0003730]; poly(A) RNA binding [GO:0044822]                                                                                                                                                                                                                                                                                                          |
| Q8NC51 | mRNA 3'-UTR binding [GO:0003730]; poly(A) RNA binding [GO:0044822]                                                                                                                                                                                                                                                                                                          |
| Q8TB72 | mRNA 3'-UTR binding [GO:0003730]; poly(A) RNA binding [GO:0044822]                                                                                                                                                                                                                                                                                                          |
| Q5TC82 | mRNA 3'-UTR binding [GO:0003730]; poly(A) RNA binding [GO:0044822]; ubiquitin protein ligase activity [GO:0061630]; zinc ion binding [GO:0008270]                                                                                                                                                                                                                           |
| P62263 | mRNA 5'-UTR binding [GO:0048027]; poly(A) RNA binding [GO:0044822]; RNA binding [GO:0003723]; small ribosomal subunit rRNA binding [GO:0070181]; structural constituent of ribosome [GO:0003735]; translation regulator activity [GO:0045182]                                                                                                                               |
| P82912 | mRNA 5'-UTR binding [GO:0048027]; poly(A) RNA binding [GO:0044822]; small ribosomal subunit                                                                                                                                                                                                                                                                                 |

|        |                                                                                                                                                                                                                              |
|--------|------------------------------------------------------------------------------------------------------------------------------------------------------------------------------------------------------------------------------|
|        | rRNA binding [GO:0070181]; structural constituent of ribosome [GO:0003735]                                                                                                                                                   |
| O75153 | mRNA binding [GO:0003729]                                                                                                                                                                                                    |
| Q8NHU6 | mRNA binding [GO:0003729]                                                                                                                                                                                                    |
| Q9BZI7 | mRNA binding [GO:0003729]; nucleocytoplasmic transporter activity [GO:0005487]; nucleotide binding [GO:0000166]; poly(A) RNA binding [GO:0044822]                                                                            |
| P0DJ3  | mRNA binding [GO:0003729]; nucleotide binding [GO:0000166]                                                                                                                                                                   |
| Q6NXG1 | mRNA binding [GO:0003729]; nucleotide binding [GO:0000166]                                                                                                                                                                   |
| Q9H4D5 | mRNA binding [GO:0003729]; nucleotide binding [GO:0000166]                                                                                                                                                                   |
| P62995 | mRNA binding [GO:0003729]; nucleotide binding [GO:0000166]; poly(A) RNA binding [GO:0044822]                                                                                                                                 |
| Q16630 | mRNA binding [GO:0003729]; nucleotide binding [GO:0000166]; poly(A) RNA binding [GO:0044822]                                                                                                                                 |
| Q8WVV9 | mRNA binding [GO:0003729]; nucleotide binding [GO:0000166]; poly(A) RNA binding [GO:0044822]                                                                                                                                 |
| Q9H6T0 | mRNA binding [GO:0003729]; nucleotide binding [GO:0000166]; poly(A) RNA binding [GO:0044822]                                                                                                                                 |
| Q9UKA9 | mRNA binding [GO:0003729]; nucleotide binding [GO:0000166]; poly(A) RNA binding [GO:0044822]                                                                                                                                 |
| Q07955 | mRNA binding [GO:0003729]; nucleotide binding [GO:0000166]; poly(A) RNA binding [GO:0044822]; RNA binding [GO:0003723]                                                                                                       |
| Q12849 | mRNA binding [GO:0003729]; nucleotide binding [GO:0000166]; poly(A) RNA binding [GO:0044822]; RNA binding [GO:0003723]                                                                                                       |
| Q99729 | mRNA binding [GO:0003729]; nucleotide binding [GO:0000166]; poly(A) RNA binding [GO:0044822]; RNA binding [GO:0003723]                                                                                                       |
| Q9Y5S9 | mRNA binding [GO:0003729]; nucleotide binding [GO:0000166]; poly(A) RNA binding [GO:0044822]; RNA binding [GO:0003723]                                                                                                       |
| P51991 | mRNA binding [GO:0003729]; nucleotide binding [GO:0000166]; poly(A) RNA binding [GO:0044822]; RNA binding [GO:0003723]; RNA transmembrane transporter activity [GO:0051033]                                                  |
| O43251 | mRNA binding [GO:0003729]; nucleotide binding [GO:0000166]; poly(A) RNA binding [GO:0044822]; RNA binding [GO:0003723]; transcription corepressor activity [GO:0003714]; transcription factor binding [GO:0008134]           |
| P05455 | mRNA binding [GO:0003729]; nucleotide binding [GO:0000166]; poly(A) RNA binding [GO:0044822]; tRNA binding [GO:0000049]                                                                                                      |
| Q5SZQ8 | mRNA binding [GO:0003729]; nucleotide binding [GO:0000166]; RNA binding [GO:0003723]                                                                                                                                         |
| Q8TC59 | mRNA binding [GO:0003729]; piRNA binding [GO:0034584]                                                                                                                                                                        |
| Q96J94 | mRNA binding [GO:0003729]; piRNA binding [GO:0034584]; single-stranded RNA binding [GO:0003727]                                                                                                                              |
| Q96PU8 | mRNA binding [GO:0003729]; poly(A) RNA binding [GO:0044822]                                                                                                                                                                  |
| Q9HAV4 | mRNA binding [GO:0003729]; poly(A) RNA binding [GO:0044822]; pre-miRNA binding [GO:0070883]; protein transporter activity [GO:0008565]; Ran GTPase binding [GO:0008536]; RNA binding [GO:0003723]; tRNA binding [GO:0000049] |
| P09234 | mRNA binding [GO:0003729]; poly(A) RNA binding [GO:0044822]; protein homodimerization activity [GO:0042803]; single-stranded RNA binding [GO:0003727]; zinc ion binding [GO:0008270]                                         |
| Q9NRA8 | mRNA binding [GO:0003729]; poly(A) RNA binding [GO:0044822]; protein transporter activity [GO:0008565]                                                                                                                       |
| P51513 | mRNA binding [GO:0003729]; poly(A) RNA binding [GO:0044822]; RNA binding [GO:0003723]                                                                                                                                        |
| Q06787 | mRNA binding [GO:0003729]; poly(A) RNA binding [GO:0044822]; RNA binding [GO:0003723]                                                                                                                                        |
| Q12996 | mRNA binding [GO:0003729]; poly(A) RNA binding [GO:0044822]; RNA binding [GO:0003723]                                                                                                                                        |
| P46782 | mRNA binding [GO:0003729]; poly(A) RNA binding [GO:0044822]; RNA binding [GO:0003723]; rRNA binding [GO:0019843]; structural constituent of ribosome [GO:0003735]                                                            |
| Q15365 | mRNA binding [GO:0003729]; poly(A) RNA binding [GO:0044822]; RNA binding [GO:0003723]; single-stranded DNA binding [GO:0003697]                                                                                              |
| Q9Y2R9 | mRNA binding [GO:0003729]; poly(A) RNA binding [GO:0044822]; rRNA binding [GO:0019843]; structural constituent of ribosome [GO:0003735]                                                                                      |
| P42766 | mRNA binding [GO:0003729]; poly(A) RNA binding [GO:0044822]; structural constituent of ribosome [GO:0003735]                                                                                                                 |
| Q9BYD1 | mRNA binding [GO:0003729]; poly(A) RNA binding [GO:0044822]; structural constituent of ribosome [GO:0003735]                                                                                                                 |

|        |                                                                                                                                                                                                                         |
|--------|-------------------------------------------------------------------------------------------------------------------------------------------------------------------------------------------------------------------------|
| P60321 | mRNA binding [GO:0003729]; zinc ion binding [GO:0008270]                                                                                                                                                                |
| Q7Z739 | N6-methyladenosine-containing RNA binding [GO:1990247]; poly(A) RNA binding [GO:0044822]                                                                                                                                |
| Q9Y5A9 | N6-methyladenosine-containing RNA binding [GO:1990247]; poly(A) RNA binding [GO:0044822]                                                                                                                                |
| Q9BYJ9 | N6-methyladenosine-containing RNA binding [GO:1990247]; poly(A) RNA binding [GO:0044822]; ribosome binding [GO:0043022]                                                                                                 |
| Q96MU7 | N6-methyladenosine-containing RNA binding [GO:1990247]; poly(A) RNA binding [GO:0044822]; RNA binding [GO:0003723]                                                                                                      |
| O95271 | NAD+ ADP-ribosyltransferase activity [GO:0003950]; zinc ion binding [GO:0008270]                                                                                                                                        |
| Q9BZR6 | neuregulin receptor activity [GO:0038131]; receptor activity [GO:0004872]                                                                                                                                               |
| O95872 | nucleic acid binding [GO:0003676]                                                                                                                                                                                       |
| Q8N302 | nucleic acid binding [GO:0003676]                                                                                                                                                                                       |
| Q8N954 | nucleic acid binding [GO:0003676]                                                                                                                                                                                       |
| Q8NA58 | nucleic acid binding [GO:0003676]                                                                                                                                                                                       |
| Q9NW75 | nucleic acid binding [GO:0003676]                                                                                                                                                                                       |
| Q6ZRY4 | nucleic acid binding [GO:0003676]; nucleotide binding [GO:0000166]                                                                                                                                                      |
| Q569K4 | nucleic acid binding [GO:0003676]; p53 binding [GO:0002039]; zinc ion binding [GO:0008270]                                                                                                                              |
| O75554 | nucleic acid binding [GO:0003676]; proline-rich region binding [GO:0070064]; zinc ion binding [GO:0008270]                                                                                                              |
| Q66K41 | nucleic acid binding [GO:0003676]; zinc ion binding [GO:0008270]                                                                                                                                                        |
| Q8WW36 | nucleic acid binding [GO:0003676]; zinc ion binding [GO:0008270]                                                                                                                                                        |
| Q9H6B1 | nucleic acid binding [GO:0003676]; zinc ion binding [GO:0008270]                                                                                                                                                        |
| Q9NYW8 | nucleic acid binding [GO:0003676]; zinc ion binding [GO:0008270]                                                                                                                                                        |
| Q9UPR6 | nucleic acid binding [GO:0003676]; zinc ion binding [GO:0008270]                                                                                                                                                        |
| Q12769 | nucleocytoplasmic transporter activity [GO:0005487]                                                                                                                                                                     |
| Q8WUM0 | nucleocytoplasmic transporter activity [GO:0005487]                                                                                                                                                                     |
| Q9H1J1 | nucleocytoplasmic transporter activity [GO:0005487]; nucleotide binding [GO:0000166]; RNA binding [GO:0003723]                                                                                                          |
| O14980 | nucleocytoplasmic transporter activity [GO:0005487]; protein transporter activity [GO:0008565]; RNA binding [GO:0003723]; transporter activity [GO:0005215]                                                             |
| Q8WUA2 | nucleotide binding [GO:0000166]; peptidyl-prolyl cis-trans isomerase activity [GO:0003755]; poly(A) RNA binding [GO:0044822]                                                                                            |
| Q9H361 | nucleotide binding [GO:0000166]; poly(A) binding [GO:0008143]                                                                                                                                                           |
| Q13310 | nucleotide binding [GO:0000166]; poly(A) binding [GO:0008143]; poly(A) RNA binding [GO:0044822]; poly(U) RNA binding [GO:0008266]                                                                                       |
| P11940 | nucleotide binding [GO:0000166]; poly(A) binding [GO:0008143]; poly(A) RNA binding [GO:0044822]; poly(U) RNA binding [GO:0008266]; protein C-terminus binding [GO:0008022]; translation activator activity [GO:0008494] |
| O60506 | nucleotide binding [GO:0000166]; poly(A) binding [GO:0008143]; poly(A) RNA binding [GO:0044822]; RNA binding [GO:0003723]                                                                                               |
| Q93062 | nucleotide binding [GO:0000166]; poly(A) binding [GO:0008143]; poly(A) RNA binding [GO:0044822]; transcription coactivator activity [GO:0003713]                                                                        |
| A0AV96 | nucleotide binding [GO:0000166]; poly(A) RNA binding [GO:0044822]                                                                                                                                                       |
| O15042 | nucleotide binding [GO:0000166]; poly(A) RNA binding [GO:0044822]                                                                                                                                                       |
| O43719 | nucleotide binding [GO:0000166]; poly(A) RNA binding [GO:0044822]                                                                                                                                                       |
| O60812 | nucleotide binding [GO:0000166]; poly(A) RNA binding [GO:0044822]                                                                                                                                                       |
| P42696 | nucleotide binding [GO:0000166]; poly(A) RNA binding [GO:0044822]                                                                                                                                                       |
| Q08170 | nucleotide binding [GO:0000166]; poly(A) RNA binding [GO:0044822]                                                                                                                                                       |
| Q13242 | nucleotide binding [GO:0000166]; poly(A) RNA binding [GO:0044822]                                                                                                                                                       |
| Q13243 | nucleotide binding [GO:0000166]; poly(A) RNA binding [GO:0044822]                                                                                                                                                       |
| Q13595 | nucleotide binding [GO:0000166]; poly(A) RNA binding [GO:0044822]                                                                                                                                                       |

|        |                                                                                                                                                                                         |
|--------|-----------------------------------------------------------------------------------------------------------------------------------------------------------------------------------------|
| Q14498 | nucleotide binding [GO:0000166]; poly(A) RNA binding [GO:0044822]                                                                                                                       |
| Q15427 | nucleotide binding [GO:0000166]; poly(A) RNA binding [GO:0044822]                                                                                                                       |
| Q4G0J3 | nucleotide binding [GO:0000166]; poly(A) RNA binding [GO:0044822]                                                                                                                       |
| Q86V81 | nucleotide binding [GO:0000166]; poly(A) RNA binding [GO:0044822]                                                                                                                       |
| Q8IXT5 | nucleotide binding [GO:0000166]; poly(A) RNA binding [GO:0044822]                                                                                                                       |
| Q8IY67 | nucleotide binding [GO:0000166]; poly(A) RNA binding [GO:0044822]                                                                                                                       |
| Q8N684 | nucleotide binding [GO:0000166]; poly(A) RNA binding [GO:0044822]                                                                                                                       |
| Q8WXA9 | nucleotide binding [GO:0000166]; poly(A) RNA binding [GO:0044822]                                                                                                                       |
| Q96T37 | nucleotide binding [GO:0000166]; poly(A) RNA binding [GO:0044822]                                                                                                                       |
| Q9BRL6 | nucleotide binding [GO:0000166]; poly(A) RNA binding [GO:0044822]                                                                                                                       |
| Q9BTD8 | nucleotide binding [GO:0000166]; poly(A) RNA binding [GO:0044822]                                                                                                                       |
| Q9GZT3 | nucleotide binding [GO:0000166]; poly(A) RNA binding [GO:0044822]                                                                                                                       |
| Q9H0L4 | nucleotide binding [GO:0000166]; poly(A) RNA binding [GO:0044822]                                                                                                                       |
| Q9HCJ3 | nucleotide binding [GO:0000166]; poly(A) RNA binding [GO:0044822]                                                                                                                       |
| Q9NTZ6 | nucleotide binding [GO:0000166]; poly(A) RNA binding [GO:0044822]                                                                                                                       |
| Q9NW13 | nucleotide binding [GO:0000166]; poly(A) RNA binding [GO:0044822]                                                                                                                       |
| Q9NWH9 | nucleotide binding [GO:0000166]; poly(A) RNA binding [GO:0044822]                                                                                                                       |
| Q9NX07 | nucleotide binding [GO:0000166]; poly(A) RNA binding [GO:0044822]                                                                                                                       |
| Q9NYK5 | nucleotide binding [GO:0000166]; poly(A) RNA binding [GO:0044822]                                                                                                                       |
| Q9Y388 | nucleotide binding [GO:0000166]; poly(A) RNA binding [GO:0044822]                                                                                                                       |
| Q9Y3A4 | nucleotide binding [GO:0000166]; poly(A) RNA binding [GO:0044822]                                                                                                                       |
| Q9Y3B4 | nucleotide binding [GO:0000166]; poly(A) RNA binding [GO:0044822]                                                                                                                       |
| Q9Y4C8 | nucleotide binding [GO:0000166]; poly(A) RNA binding [GO:0044822]                                                                                                                       |
| Q9Y580 | nucleotide binding [GO:0000166]; poly(A) RNA binding [GO:0044822]                                                                                                                       |
| P26599 | nucleotide binding [GO:0000166]; poly(A) RNA binding [GO:0044822]; poly-pyrimidine tract binding [GO:0008187]; pre-mRNA binding [GO:0036002]; RNA binding [GO:0003723]                  |
| Q96DH6 | nucleotide binding [GO:0000166]; poly(A) RNA binding [GO:0044822]; poly(U) RNA binding [GO:0008266]                                                                                     |
| O43347 | nucleotide binding [GO:0000166]; poly(A) RNA binding [GO:0044822]; poly(U) RNA binding [GO:0008266]; RNA binding [GO:0003723]                                                           |
| P31943 | nucleotide binding [GO:0000166]; poly(A) RNA binding [GO:0044822]; poly(U) RNA binding [GO:0008266]; RNA binding [GO:0003723]                                                           |
| Q13247 | nucleotide binding [GO:0000166]; poly(A) RNA binding [GO:0044822]; pre-mRNA binding [GO:0036002]; RNA binding [GO:0003723]                                                              |
| Q01130 | nucleotide binding [GO:0000166]; poly(A) RNA binding [GO:0044822]; pre-mRNA binding [GO:0036002]; transcription corepressor activity [GO:0003714]                                       |
| P22626 | nucleotide binding [GO:0000166]; poly(A) RNA binding [GO:0044822]; pre-mRNA intronic binding [GO:0097157]; RNA binding [GO:0003723]; single-stranded telomeric DNA binding [GO:0043047] |
| P52272 | nucleotide binding [GO:0000166]; poly(A) RNA binding [GO:0044822]; protein domain specific binding [GO:0019904]; RNA binding [GO:0003723]                                               |
| Q9UN86 | nucleotide binding [GO:0000166]; poly(A) RNA binding [GO:0044822]; receptor signaling complex scaffold activity [GO:0030159]                                                            |
| P98179 | nucleotide binding [GO:0000166]; poly(A) RNA binding [GO:0044822]; ribosomal large subunit binding [GO:0043023]; RNA binding [GO:0003723]                                               |
| P52298 | nucleotide binding [GO:0000166]; poly(A) RNA binding [GO:0044822]; RNA 7-methylguanosine cap binding [GO:0000340]; RNA cap binding [GO:0000339]                                         |
| O43390 | nucleotide binding [GO:0000166]; poly(A) RNA binding [GO:0044822]; RNA binding [GO:0003723]                                                                                             |
| O95319 | nucleotide binding [GO:0000166]; poly(A) RNA binding [GO:0044822]; RNA binding [GO:0003723]                                                                                             |
| O95758 | nucleotide binding [GO:0000166]; poly(A) RNA binding [GO:0044822]; RNA binding [GO:0003723]                                                                                             |
| P08621 | nucleotide binding [GO:0000166]; poly(A) RNA binding [GO:0044822]; RNA binding [GO:0003723]                                                                                             |

|        |                                                                                                                                                                                                                                                                                                                                                                                                       |
|--------|-------------------------------------------------------------------------------------------------------------------------------------------------------------------------------------------------------------------------------------------------------------------------------------------------------------------------------------------------------------------------------------------------------|
| P31942 | nucleotide binding [GO:0000166]; poly(A) RNA binding [GO:0044822]; RNA binding [GO:0003723]                                                                                                                                                                                                                                                                                                           |
| P33240 | nucleotide binding [GO:0000166]; poly(A) RNA binding [GO:0044822]; RNA binding [GO:0003723]                                                                                                                                                                                                                                                                                                           |
| P55795 | nucleotide binding [GO:0000166]; poly(A) RNA binding [GO:0044822]; RNA binding [GO:0003723]                                                                                                                                                                                                                                                                                                           |
| P84103 | nucleotide binding [GO:0000166]; poly(A) RNA binding [GO:0044822]; RNA binding [GO:0003723]                                                                                                                                                                                                                                                                                                           |
| Q15434 | nucleotide binding [GO:0000166]; poly(A) RNA binding [GO:0044822]; RNA binding [GO:0003723]                                                                                                                                                                                                                                                                                                           |
| Q86U42 | nucleotide binding [GO:0000166]; poly(A) RNA binding [GO:0044822]; RNA binding [GO:0003723]                                                                                                                                                                                                                                                                                                           |
| Q8IUH3 | nucleotide binding [GO:0000166]; poly(A) RNA binding [GO:0044822]; RNA binding [GO:0003723]                                                                                                                                                                                                                                                                                                           |
| Q8NDT2 | nucleotide binding [GO:0000166]; poly(A) RNA binding [GO:0044822]; RNA binding [GO:0003723]                                                                                                                                                                                                                                                                                                           |
| Q9BYG3 | nucleotide binding [GO:0000166]; poly(A) RNA binding [GO:0044822]; RNA binding [GO:0003723]                                                                                                                                                                                                                                                                                                           |
| Q9UKM9 | nucleotide binding [GO:0000166]; poly(A) RNA binding [GO:0044822]; RNA binding [GO:0003723]                                                                                                                                                                                                                                                                                                           |
| Q96EP5 | nucleotide binding [GO:0000166]; poly(A) RNA binding [GO:0044822]; RNA binding [GO:0003723]; RNA stem-loop binding [GO:0035613]                                                                                                                                                                                                                                                                       |
| O75494 | nucleotide binding [GO:0000166]; poly(A) RNA binding [GO:0044822]; RNA binding [GO:0003723]; RS domain binding [GO:0050733]; unfolded protein binding [GO:0051082]                                                                                                                                                                                                                                    |
| Q8WXF0 | nucleotide binding [GO:0000166]; poly(A) RNA binding [GO:0044822]; RNA binding [GO:0003723]; RS domain binding [GO:0050733]; unfolded protein binding [GO:0051082]                                                                                                                                                                                                                                    |
| P09651 | nucleotide binding [GO:0000166]; poly(A) RNA binding [GO:0044822]; RNA binding [GO:0003723]; single-stranded DNA binding [GO:0003697]; single-stranded RNA binding [GO:0003727]                                                                                                                                                                                                                       |
| P52597 | nucleotide binding [GO:0000166]; poly(A) RNA binding [GO:0044822]; RNA binding [GO:0003723]; single-stranded RNA binding [GO:0003727]                                                                                                                                                                                                                                                                 |
| P09012 | nucleotide binding [GO:0000166]; poly(A) RNA binding [GO:0044822]; RNA binding [GO:0003723]; snRNA binding [GO:0017069]                                                                                                                                                                                                                                                                               |
| Q14103 | nucleotide binding [GO:0000166]; poly(A) RNA binding [GO:0044822]; RNA binding [GO:0003723]; telomeric DNA binding [GO:0042162]                                                                                                                                                                                                                                                                       |
| P14866 | nucleotide binding [GO:0000166]; poly(A) RNA binding [GO:0044822]; RNA binding [GO:0003723]; transcription regulatory region DNA binding [GO:0044212]                                                                                                                                                                                                                                                 |
| Q15056 | nucleotide binding [GO:0000166]; poly(A) RNA binding [GO:0044822]; RNA binding [GO:0003723]; translation factor activity, RNA binding [GO:0008135]; translation initiation factor activity [GO:0003743]                                                                                                                                                                                               |
| P23588 | nucleotide binding [GO:0000166]; poly(A) RNA binding [GO:0044822]; RNA binding [GO:0003723]; translation initiation factor activity [GO:0003743]                                                                                                                                                                                                                                                      |
| Q8IZ69 | nucleotide binding [GO:0000166]; poly(A) RNA binding [GO:0044822]; RNA methyltransferase activity [GO:0008173]                                                                                                                                                                                                                                                                                        |
| Q96T58 | nucleotide binding [GO:0000166]; poly(A) RNA binding [GO:0044822]; RNA polymerase II transcription factor binding [GO:0001085]; single-stranded DNA binding [GO:0003697]; transcriptional repressor activity, RNA polymerase II transcription factor binding [GO:0001191]; transcription corepressor activity [GO:0003714]; transcription factor activity, sequence-specific DNA binding [GO:0003700] |
| P62750 | nucleotide binding [GO:0000166]; poly(A) RNA binding [GO:0044822]; rRNA binding [GO:0019843]; structural constituent of ribosome [GO:0003735]                                                                                                                                                                                                                                                         |
| Q9UBU9 | nucleotide binding [GO:0000166]; poly(A) RNA binding [GO:0044822]; single-stranded RNA binding [GO:0003727]                                                                                                                                                                                                                                                                                           |
| P43243 | nucleotide binding [GO:0000166]; poly(A) RNA binding [GO:0044822]; structural molecule activity [GO:0005198]; zinc ion binding [GO:0008270]                                                                                                                                                                                                                                                           |
| O75821 | nucleotide binding [GO:0000166]; poly(A) RNA binding [GO:0044822]; translation initiation factor activity [GO:0003743]                                                                                                                                                                                                                                                                                |
| Q16629 | nucleotide binding [GO:0000166]; poly(A) RNA binding [GO:0044822]; zinc ion binding [GO:0008270]                                                                                                                                                                                                                                                                                                      |
| Q8TBF4 | nucleotide binding [GO:0000166]; poly(A) RNA binding [GO:0044822]; zinc ion binding [GO:0008270]                                                                                                                                                                                                                                                                                                      |
| Q9BQ04 | nucleotide binding [GO:0000166]; poly(A) RNA binding [GO:0044822]; zinc ion binding [GO:0008270]                                                                                                                                                                                                                                                                                                      |
| P57052 | nucleotide binding [GO:0000166]; poly(U) RNA binding [GO:0008266]; protein homodimerization activity [GO:0042803]                                                                                                                                                                                                                                                                                     |
| Q96LT9 | nucleotide binding [GO:0000166]; pre-mRNA intronic binding [GO:0097157]; U12 snRNA binding [GO:0030626]                                                                                                                                                                                                                                                                                               |
| Q9NWB1 | nucleotide binding [GO:0000166]; protein C-terminus binding [GO:0008022]; RNA binding [GO:0003723]                                                                                                                                                                                                                                                                                                    |



|        |                                                                                                                             |
|--------|-----------------------------------------------------------------------------------------------------------------------------|
| P55884 | nucleotide binding [GO:0000166]; protein complex scaffold [GO:0032947]; translation initiation factor activity [GO:0003743] |
| Q9P0M2 | nucleotide binding [GO:0000166]; protein kinase A binding [GO:0051018]                                                      |
| A6NDE4 | nucleotide binding [GO:0000166]; RNA binding [GO:0003723]                                                                   |
| A6NDY0 | nucleotide binding [GO:0000166]; RNA binding [GO:0003723]                                                                   |
| A6NEQ0 | nucleotide binding [GO:0000166]; RNA binding [GO:0003723]                                                                   |
| O75526 | nucleotide binding [GO:0000166]; RNA binding [GO:0003723]                                                                   |
| P0C7P1 | nucleotide binding [GO:0000166]; RNA binding [GO:0003723]                                                                   |
| P0CB38 | nucleotide binding [GO:0000166]; RNA binding [GO:0003723]                                                                   |
| P0DJ4  | nucleotide binding [GO:0000166]; RNA binding [GO:0003723]                                                                   |
| Q13117 | nucleotide binding [GO:0000166]; RNA binding [GO:0003723]                                                                   |
| Q15415 | nucleotide binding [GO:0000166]; RNA binding [GO:0003723]                                                                   |
| Q16560 | nucleotide binding [GO:0000166]; RNA binding [GO:0003723]                                                                   |
| Q32P51 | nucleotide binding [GO:0000166]; RNA binding [GO:0003723]                                                                   |
| Q4VXU2 | nucleotide binding [GO:0000166]; RNA binding [GO:0003723]                                                                   |
| Q5JQF8 | nucleotide binding [GO:0000166]; RNA binding [GO:0003723]                                                                   |
| Q86SG3 | nucleotide binding [GO:0000166]; RNA binding [GO:0003723]                                                                   |
| Q86U06 | nucleotide binding [GO:0000166]; RNA binding [GO:0003723]                                                                   |
| Q8N6W0 | nucleotide binding [GO:0000166]; RNA binding [GO:0003723]                                                                   |
| Q8N7X1 | nucleotide binding [GO:0000166]; RNA binding [GO:0003723]                                                                   |
| Q8TBY0 | nucleotide binding [GO:0000166]; RNA binding [GO:0003723]                                                                   |
| Q96DU9 | nucleotide binding [GO:0000166]; RNA binding [GO:0003723]                                                                   |
| Q96H35 | nucleotide binding [GO:0000166]; RNA binding [GO:0003723]                                                                   |
| Q96I25 | nucleotide binding [GO:0000166]; RNA binding [GO:0003723]                                                                   |
| Q96J87 | nucleotide binding [GO:0000166]; RNA binding [GO:0003723]                                                                   |
| Q9BRS8 | nucleotide binding [GO:0000166]; RNA binding [GO:0003723]                                                                   |
| Q9GZY0 | nucleotide binding [GO:0000166]; RNA binding [GO:0003723]                                                                   |
| Q9H1B4 | nucleotide binding [GO:0000166]; RNA binding [GO:0003723]                                                                   |
| Q9NR90 | nucleotide binding [GO:0000166]; RNA binding [GO:0003723]                                                                   |
| Q9Y4F3 | nucleotide binding [GO:0000166]; RNA binding [GO:0003723]                                                                   |
| Q9NQ94 | nucleotide binding [GO:0000166]; RNA binding [GO:0003723]; single-stranded RNA binding [GO:0003727]                         |
| Q8N9W6 | nucleotide binding [GO:0000166]; RNA binding [GO:0003723]; translation activator activity [GO:0008494]                      |
| Q9NQZ3 | nucleotide binding [GO:0000166]; RNA binding [GO:0003723]; translation activator activity [GO:0008494]                      |
| Q96E39 | nucleotide binding [GO:0000166]; single-stranded RNA binding [GO:0003727]                                                   |
| P08579 | nucleotide binding [GO:0000166]; snRNA binding [GO:0017069]                                                                 |
| Q7Z5W3 | O-methyltransferase activity [GO:0008171]; RNA methyltransferase activity [GO:0008173]                                      |
| Q9UBI6 | PDZ domain binding [GO:0030165]; phosphate ion binding [GO:0042301]; signal transducer activity [GO:0004871]                |
| Q9ULH0 | PDZ domain binding [GO:0030165]; protein kinase regulator activity [GO:0019887]                                             |
| Q2TV78 | peptidase activity [GO:0008233]                                                                                             |
| Q9H3S3 | peptidase activity [GO:0008233]; scavenger receptor activity [GO:0005044]; serine-type endopeptidase activity [GO:0004252]  |
| O60235 | peptidase activity [GO:0008233]; serine-type endopeptidase activity [GO:0004252]                                            |
| P08861 | peptidase activity [GO:0008233]; serine-type endopeptidase activity [GO:0004252]                                            |

|        |                                                                                                                                                                |
|--------|----------------------------------------------------------------------------------------------------------------------------------------------------------------|
| Q99895 | peptidase activity [GO:0008233]; serine-type endopeptidase activity [GO:0004252]                                                                               |
| P49862 | peptidase activity [GO:0008233]; serine-type endopeptidase activity [GO:0004252]; serine-type peptidase activity [GO:0008236]                                  |
| Q9UKR0 | peptidase activity [GO:0008233]; serine-type endopeptidase activity [GO:0004252]; serine-type peptidase activity [GO:0008236]                                  |
| Q9Y337 | peptidase activity [GO:0008233]; serine-type endopeptidase activity [GO:0004252]; serine-type peptidase activity [GO:0008236]                                  |
| Q8WXD0 | peptide hormone binding [GO:0017046]; protein-hormone receptor activity [GO:0016500]                                                                           |
| Q96BP3 | peptidyl-prolyl cis-trans isomerase activity [GO:0003755]                                                                                                      |
| P55199 | phosphatase binding [GO:0019902]                                                                                                                               |
| Q9Y263 | phospholipase A2 activator activity [GO:0016005]                                                                                                               |
| O60733 | phospholipase A2 activity [GO:0004623]                                                                                                                         |
| P50851 | phospholipid binding [GO:0005543]                                                                                                                              |
| Q6ZS30 | phospholipid binding [GO:0005543]                                                                                                                              |
| Q6ZS81 | phospholipid binding [GO:0005543]                                                                                                                              |
| Q99698 | phospholipid binding [GO:0005543]                                                                                                                              |
| Q92636 | phospholipid binding [GO:0005543]; receptor signaling protein activity [GO:0005057]                                                                            |
| Q9Y4P3 | phosphoprotein binding [GO:0051219]; poly(A) RNA binding [GO:0044822]; protein kinase binding [GO:0019901]; translation initiation factor binding [GO:0031369] |
| O95163 | phosphorylase kinase regulator activity [GO:0008607]; signal transducer activity [GO:0004871]                                                                  |
| Q7Z3Z4 | piRNA binding [GO:0034584]                                                                                                                                     |
| Q5VWX1 | poly(A) binding [GO:0008143]; poly(U) RNA binding [GO:0008266]                                                                                                 |
| O00566 | poly(A) RNA binding [GO:0044822]                                                                                                                               |
| O15213 | poly(A) RNA binding [GO:0044822]                                                                                                                               |
| O43290 | poly(A) RNA binding [GO:0044822]                                                                                                                               |
| O43818 | poly(A) RNA binding [GO:0044822]                                                                                                                               |
| O60287 | poly(A) RNA binding [GO:0044822]                                                                                                                               |
| O60508 | poly(A) RNA binding [GO:0044822]                                                                                                                               |
| O75691 | poly(A) RNA binding [GO:0044822]                                                                                                                               |
| O75940 | poly(A) RNA binding [GO:0044822]                                                                                                                               |
| O95926 | poly(A) RNA binding [GO:0044822]                                                                                                                               |
| P35544 | poly(A) RNA binding [GO:0044822]                                                                                                                               |
| P55081 | poly(A) RNA binding [GO:0044822]                                                                                                                               |
| P56182 | poly(A) RNA binding [GO:0044822]                                                                                                                               |
| P61326 | poly(A) RNA binding [GO:0044822]                                                                                                                               |
| P62308 | poly(A) RNA binding [GO:0044822]                                                                                                                               |
| P62310 | poly(A) RNA binding [GO:0044822]                                                                                                                               |
| P62312 | poly(A) RNA binding [GO:0044822]                                                                                                                               |
| P62316 | poly(A) RNA binding [GO:0044822]                                                                                                                               |
| P63162 | poly(A) RNA binding [GO:0044822]                                                                                                                               |
| Q13435 | poly(A) RNA binding [GO:0044822]                                                                                                                               |
| Q13895 | poly(A) RNA binding [GO:0044822]                                                                                                                               |
| Q14684 | poly(A) RNA binding [GO:0044822]                                                                                                                               |
| Q15050 | poly(A) RNA binding [GO:0044822]                                                                                                                               |
| Q5C9Z4 | poly(A) RNA binding [GO:0044822]                                                                                                                               |
| Q5JTH9 | poly(A) RNA binding [GO:0044822]                                                                                                                               |

|        |                                  |
|--------|----------------------------------|
| Q5QJE6 | poly(A) RNA binding [GO:0044822] |
| Q5RKV6 | poly(A) RNA binding [GO:0044822] |
| Q5VTL8 | poly(A) RNA binding [GO:0044822] |
| Q659C4 | poly(A) RNA binding [GO:0044822] |
| Q66PJ3 | poly(A) RNA binding [GO:0044822] |
| Q6UN15 | poly(A) RNA binding [GO:0044822] |
| Q71RC2 | poly(A) RNA binding [GO:0044822] |
| Q86U38 | poly(A) RNA binding [GO:0044822] |
| Q8IWZ3 | poly(A) RNA binding [GO:0044822] |
| Q8IWZ8 | poly(A) RNA binding [GO:0044822] |
| Q8IX01 | poly(A) RNA binding [GO:0044822] |
| Q8NAV1 | poly(A) RNA binding [GO:0044822] |
| Q8NEJ9 | poly(A) RNA binding [GO:0044822] |
| Q8NI36 | poly(A) RNA binding [GO:0044822] |
| Q92615 | poly(A) RNA binding [GO:0044822] |
| Q969X6 | poly(A) RNA binding [GO:0044822] |
| Q96A72 | poly(A) RNA binding [GO:0044822] |
| Q96BP2 | poly(A) RNA binding [GO:0044822] |
| Q96DI7 | poly(A) RNA binding [GO:0044822] |
| Q99848 | poly(A) RNA binding [GO:0044822] |
| Q9BQ67 | poly(A) RNA binding [GO:0044822] |
| Q9BRD0 | poly(A) RNA binding [GO:0044822] |
| Q9BRT6 | poly(A) RNA binding [GO:0044822] |
| Q9BSC4 | poly(A) RNA binding [GO:0044822] |
| Q9BVJ6 | poly(A) RNA binding [GO:0044822] |
| Q9BYN8 | poly(A) RNA binding [GO:0044822] |
| Q9C0J8 | poly(A) RNA binding [GO:0044822] |
| Q9H501 | poly(A) RNA binding [GO:0044822] |
| Q9H694 | poly(A) RNA binding [GO:0044822] |
| Q9H6F5 | poly(A) RNA binding [GO:0044822] |
| Q9H6R4 | poly(A) RNA binding [GO:0044822] |
| Q9H8H0 | poly(A) RNA binding [GO:0044822] |
| Q9NNW5 | poly(A) RNA binding [GO:0044822] |
| Q9NQ50 | poly(A) RNA binding [GO:0044822] |
| Q9NQZ2 | poly(A) RNA binding [GO:0044822] |
| Q9NRX1 | poly(A) RNA binding [GO:0044822] |
| Q9NV06 | poly(A) RNA binding [GO:0044822] |
| Q9NXG2 | poly(A) RNA binding [GO:0044822] |
| Q9NZM5 | poly(A) RNA binding [GO:0044822] |
| Q9UJA5 | poly(A) RNA binding [GO:0044822] |
| Q9UKD2 | poly(A) RNA binding [GO:0044822] |
| Q9UMY1 | poly(A) RNA binding [GO:0044822] |
| Q9Y2Q9 | poly(A) RNA binding [GO:0044822] |
| Q9Y324 | poly(A) RNA binding [GO:0044822] |

|        |                                                                                                                                                                                                                                                                     |
|--------|---------------------------------------------------------------------------------------------------------------------------------------------------------------------------------------------------------------------------------------------------------------------|
| Q9Y3A2 | poly(A) RNA binding [GO:0044822]                                                                                                                                                                                                                                    |
| Q9Y3F4 | poly(A) RNA binding [GO:0044822]                                                                                                                                                                                                                                    |
| Q9Y5J1 | poly(A) RNA binding [GO:0044822]                                                                                                                                                                                                                                    |
| Q15637 | poly(A) RNA binding [GO:0044822]; pre-mRNA branch point binding [GO:0045131]; RNA binding [GO:0003723]; transcription corepressor activity [GO:0003714]; zinc ion binding [GO:0008270]                                                                              |
| P0CG48 | poly(A) RNA binding [GO:0044822]; protease binding [GO:0002020]                                                                                                                                                                                                     |
| Q96D46 | poly(A) RNA binding [GO:0044822]; protein binding, bridging [GO:0030674]; ribosomal large subunit binding [GO:0043023]                                                                                                                                              |
| Q92667 | poly(A) RNA binding [GO:0044822]; protein kinase A regulatory subunit binding [GO:0034237]; RNA binding [GO:0003723]                                                                                                                                                |
| Q14CZ7 | poly(A) RNA binding [GO:0044822]; protein kinase activity [GO:0004672]                                                                                                                                                                                              |
| Q53R41 | poly(A) RNA binding [GO:0044822]; protein kinase activity [GO:0004672]                                                                                                                                                                                              |
| Q7L8L6 | poly(A) RNA binding [GO:0044822]; protein kinase activity [GO:0004672]; rRNA binding [GO:0019843]                                                                                                                                                                   |
| Q9NYY8 | poly(A) RNA binding [GO:0044822]; protein kinase activity [GO:0004672]; rRNA binding [GO:0019843]                                                                                                                                                                   |
| P62753 | poly(A) RNA binding [GO:0044822]; protein kinase binding [GO:0019901]; structural constituent of ribosome [GO:0003735]                                                                                                                                              |
| O95900 | poly(A) RNA binding [GO:0044822]; pseudouridine synthase activity [GO:0009982]                                                                                                                                                                                      |
| Q6P087 | poly(A) RNA binding [GO:0044822]; pseudouridine synthase activity [GO:0009982]                                                                                                                                                                                      |
| Q8IZ73 | poly(A) RNA binding [GO:0044822]; pseudouridine synthase activity [GO:0009982]                                                                                                                                                                                      |
| Q96CM3 | poly(A) RNA binding [GO:0044822]; pseudouridine synthase activity [GO:0009982]                                                                                                                                                                                      |
| O60832 | poly(A) RNA binding [GO:0044822]; pseudouridine synthase activity [GO:0009982]; RNA binding [GO:0003723]; telomerase activity [GO:0003720]                                                                                                                          |
| Q9Y333 | poly(A) RNA binding [GO:0044822]; Ral GTPase binding [GO:0017160]; U6 snRNA binding [GO:0017070]                                                                                                                                                                    |
| Q9H9J2 | poly(A) RNA binding [GO:0044822]; ribonuclease III activity [GO:0004525]                                                                                                                                                                                            |
| Q99575 | poly(A) RNA binding [GO:0044822]; ribonuclease MRP activity [GO:0000171]; ribonuclease P activity [GO:0004526]                                                                                                                                                      |
| P78346 | poly(A) RNA binding [GO:0044822]; ribonuclease P activity [GO:0004526]                                                                                                                                                                                              |
| Q14137 | poly(A) RNA binding [GO:0044822]; ribonucleoprotein complex binding [GO:0043021]                                                                                                                                                                                    |
| Q8WWY3 | poly(A) RNA binding [GO:0044822]; ribonucleoprotein complex binding [GO:0043021]; snRNP binding [GO:0070990]                                                                                                                                                        |
| Q96EY7 | poly(A) RNA binding [GO:0044822]; ribosomal small subunit binding [GO:0043024]; rRNA binding [GO:0019843]                                                                                                                                                           |
| P62495 | poly(A) RNA binding [GO:0044822]; ribosome binding [GO:0043022]; RNA binding [GO:0003723]; translation release factor activity [GO:0003747]; translation release factor activity, codon specific [GO:0016149]; translation termination factor activity [GO:0008079] |
| P05198 | poly(A) RNA binding [GO:0044822]; ribosome binding [GO:0043022]; translation initiation factor activity [GO:0003743]                                                                                                                                                |
| O75525 | poly(A) RNA binding [GO:0044822]; RNA binding [GO:0003723]                                                                                                                                                                                                          |
| P62314 | poly(A) RNA binding [GO:0044822]; RNA binding [GO:0003723]                                                                                                                                                                                                          |
| Q05048 | poly(A) RNA binding [GO:0044822]; RNA binding [GO:0003723]                                                                                                                                                                                                          |
| Q14444 | poly(A) RNA binding [GO:0044822]; RNA binding [GO:0003723]                                                                                                                                                                                                          |
| Q15459 | poly(A) RNA binding [GO:0044822]; RNA binding [GO:0003723]                                                                                                                                                                                                          |
| Q96HR8 | poly(A) RNA binding [GO:0044822]; RNA binding [GO:0003723]                                                                                                                                                                                                          |
| Q9BTL3 | poly(A) RNA binding [GO:0044822]; RNA binding [GO:0003723]                                                                                                                                                                                                          |
| Q9BZJ0 | poly(A) RNA binding [GO:0044822]; RNA binding [GO:0003723]                                                                                                                                                                                                          |
| Q9UNW9 | poly(A) RNA binding [GO:0044822]; RNA binding [GO:0003723]                                                                                                                                                                                                          |
| Q09161 | poly(A) RNA binding [GO:0044822]; RNA binding [GO:0003723]; RNA cap binding [GO:0000339]                                                                                                                                                                            |
| P61978 | poly(A) RNA binding [GO:0044822]; RNA binding [GO:0003723]; RNA polymerase II core promoter proximal region sequence-specific DNA binding [GO:0000978]; single-stranded DNA binding                                                                                 |

|        |                                                                                                                                                                                                                                                          |
|--------|----------------------------------------------------------------------------------------------------------------------------------------------------------------------------------------------------------------------------------------------------------|
|        | [GO:0003697]; transcriptional activator activity, RNA polymerase II core promoter proximal region sequence-specific binding [GO:0001077]                                                                                                                 |
| Q92979 | poly(A) RNA binding [GO:0044822]; RNA binding [GO:0003723]; rRNA (pseudouridine) methyltransferase activity [GO:0070037]; rRNA binding [GO:0019843]                                                                                                      |
| P62913 | poly(A) RNA binding [GO:0044822]; RNA binding [GO:0003723]; rRNA binding [GO:0019843]; structural constituent of ribosome [GO:0003735]                                                                                                                   |
| P62917 | poly(A) RNA binding [GO:0044822]; RNA binding [GO:0003723]; rRNA binding [GO:0019843]; structural constituent of ribosome [GO:0003735]                                                                                                                   |
| O00567 | poly(A) RNA binding [GO:0044822]; RNA binding [GO:0003723]; snoRNA binding [GO:0030515]                                                                                                                                                                  |
| P05388 | poly(A) RNA binding [GO:0044822]; RNA binding [GO:0003723]; structural constituent of ribosome [GO:0003735]                                                                                                                                              |
| P09001 | poly(A) RNA binding [GO:0044822]; RNA binding [GO:0003723]; structural constituent of ribosome [GO:0003735]                                                                                                                                              |
| P36578 | poly(A) RNA binding [GO:0044822]; RNA binding [GO:0003723]; structural constituent of ribosome [GO:0003735]                                                                                                                                              |
| P39023 | poly(A) RNA binding [GO:0044822]; RNA binding [GO:0003723]; structural constituent of ribosome [GO:0003735]                                                                                                                                              |
| P50914 | poly(A) RNA binding [GO:0044822]; RNA binding [GO:0003723]; structural constituent of ribosome [GO:0003735]                                                                                                                                              |
| P61254 | poly(A) RNA binding [GO:0044822]; RNA binding [GO:0003723]; structural constituent of ribosome [GO:0003735]                                                                                                                                              |
| P61313 | poly(A) RNA binding [GO:0044822]; RNA binding [GO:0003723]; structural constituent of ribosome [GO:0003735]                                                                                                                                              |
| P62244 | poly(A) RNA binding [GO:0044822]; RNA binding [GO:0003723]; structural constituent of ribosome [GO:0003735]                                                                                                                                              |
| P62249 | poly(A) RNA binding [GO:0044822]; RNA binding [GO:0003723]; structural constituent of ribosome [GO:0003735]                                                                                                                                              |
| P62424 | poly(A) RNA binding [GO:0044822]; RNA binding [GO:0003723]; structural constituent of ribosome [GO:0003735]                                                                                                                                              |
| P62888 | poly(A) RNA binding [GO:0044822]; RNA binding [GO:0003723]; structural constituent of ribosome [GO:0003735]                                                                                                                                              |
| P62899 | poly(A) RNA binding [GO:0044822]; RNA binding [GO:0003723]; structural constituent of ribosome [GO:0003735]                                                                                                                                              |
| Q92901 | poly(A) RNA binding [GO:0044822]; RNA binding [GO:0003723]; structural constituent of ribosome [GO:0003735]                                                                                                                                              |
| O95218 | poly(A) RNA binding [GO:0044822]; RNA binding [GO:0003723]; transcription factor activity, sequence-specific DNA binding [GO:0003700]; zinc ion binding [GO:0008270]                                                                                     |
| O15116 | poly(A) RNA binding [GO:0044822]; RNA cap binding [GO:0000339]                                                                                                                                                                                           |
| O43432 | poly(A) RNA binding [GO:0044822]; RNA cap binding [GO:0000339]; translation factor activity, RNA binding [GO:0008135]; translation initiation factor activity [GO:0003743]                                                                               |
| O60573 | poly(A) RNA binding [GO:0044822]; RNA cap binding [GO:0000339]; translation factor activity, RNA binding [GO:0008135]; translation initiation factor activity [GO:0003743]; ubiquitin protein ligase binding [GO:0031625]                                |
| Q6IN84 | poly(A) RNA binding [GO:0044822]; RNA methyltransferase activity [GO:0008173]                                                                                                                                                                            |
| Q9HC36 | poly(A) RNA binding [GO:0044822]; RNA methyltransferase activity [GO:0008173]                                                                                                                                                                            |
| Q7L2J0 | poly(A) RNA binding [GO:0044822]; RNA methyltransferase activity [GO:0008173]; S-adenosylmethionine-dependent methyltransferase activity [GO:0008757]                                                                                                    |
| Q96I24 | poly(A) RNA binding [GO:0044822]; RNA polymerase II core promoter proximal region sequence-specific DNA binding [GO:0000978]; transcriptional activator activity, RNA polymerase II core promoter proximal region sequence-specific binding [GO:0001077] |
| Q5TAX3 | poly(A) RNA binding [GO:0044822]; RNA uridylyltransferase activity [GO:0050265]; zinc ion binding [GO:0008270]                                                                                                                                           |
| Q5VYS8 | poly(A) RNA binding [GO:0044822]; RNA uridylyltransferase activity [GO:0050265]; zinc ion binding [GO:0008270]                                                                                                                                           |
| Q9H5Q4 | poly(A) RNA binding [GO:0044822]; rRNA (adenine-N6,N6-)-dimethyltransferase activity [GO:0000179]; transcription cofactor activity [GO:0003712]                                                                                                          |
| Q9UGY1 | poly(A) RNA binding [GO:0044822]; rRNA binding [GO:0019843]                                                                                                                                                                                              |

|        |                                                                                                                                                                                                                                                                     |
|--------|---------------------------------------------------------------------------------------------------------------------------------------------------------------------------------------------------------------------------------------------------------------------|
| P30050 | poly(A) RNA binding [GO:0044822]; rRNA binding [GO:0019843]; structural constituent of ribosome [GO:0003735]                                                                                                                                                        |
| P62269 | poly(A) RNA binding [GO:0044822]; rRNA binding [GO:0019843]; structural constituent of ribosome [GO:0003735]                                                                                                                                                        |
| P62280 | poly(A) RNA binding [GO:0044822]; rRNA binding [GO:0019843]; structural constituent of ribosome [GO:0003735]                                                                                                                                                        |
| Q9BYC9 | poly(A) RNA binding [GO:0044822]; rRNA binding [GO:0019843]; structural constituent of ribosome [GO:0003735]                                                                                                                                                        |
| Q9Y3B7 | poly(A) RNA binding [GO:0044822]; rRNA binding [GO:0019843]; structural constituent of ribosome [GO:0003735]                                                                                                                                                        |
| P46781 | poly(A) RNA binding [GO:0044822]; rRNA binding [GO:0019843]; structural constituent of ribosome [GO:0003735]; translation regulator activity [GO:0045182]                                                                                                           |
| Q68CQ4 | poly(A) RNA binding [GO:0044822]; rRNA binding [GO:0019843]; U3 snoRNA binding [GO:0034511]                                                                                                                                                                         |
| Q8IY81 | poly(A) RNA binding [GO:0044822]; rRNA methyltransferase activity [GO:0008649]                                                                                                                                                                                      |
| P62633 | poly(A) RNA binding [GO:0044822]; single-stranded DNA binding [GO:0003697]; single-stranded RNA binding [GO:0003727]; transcription factor activity, sequence-specific DNA binding [GO:0003700]; zinc ion binding [GO:0008270]                                      |
| Q96AE4 | poly(A) RNA binding [GO:0044822]; single-stranded DNA binding [GO:0003697]; transcriptional activator activity, RNA polymerase II distal enhancer sequence-specific binding [GO:0001205]; transcription factor activity, sequence-specific DNA binding [GO:0003700] |
| Q9BRU9 | poly(A) RNA binding [GO:0044822]; small ribosomal subunit rRNA binding [GO:0070181]                                                                                                                                                                                 |
| Q12788 | poly(A) RNA binding [GO:0044822]; snoRNA binding [GO:0030515]                                                                                                                                                                                                       |
| Q15269 | poly(A) RNA binding [GO:0044822]; snoRNA binding [GO:0030515]                                                                                                                                                                                                       |
| Q8TED0 | poly(A) RNA binding [GO:0044822]; snoRNA binding [GO:0030515]                                                                                                                                                                                                       |
| Q9H583 | poly(A) RNA binding [GO:0044822]; snoRNA binding [GO:0030515]                                                                                                                                                                                                       |
| Q9NX24 | poly(A) RNA binding [GO:0044822]; snoRNA binding [GO:0030515]                                                                                                                                                                                                       |
| Q9UNX4 | poly(A) RNA binding [GO:0044822]; snoRNA binding [GO:0030515]                                                                                                                                                                                                       |
| Q9Y2X3 | poly(A) RNA binding [GO:0044822]; snoRNA binding [GO:0030515]                                                                                                                                                                                                       |
| Q8TEQ6 | poly(A) RNA binding [GO:0044822]; snRNA binding [GO:0017069]                                                                                                                                                                                                        |
| O60783 | poly(A) RNA binding [GO:0044822]; structural constituent of ribosome [GO:0003735]                                                                                                                                                                                   |
| P25398 | poly(A) RNA binding [GO:0044822]; structural constituent of ribosome [GO:0003735]                                                                                                                                                                                   |
| P27635 | poly(A) RNA binding [GO:0044822]; structural constituent of ribosome [GO:0003735]                                                                                                                                                                                   |
| P46783 | poly(A) RNA binding [GO:0044822]; structural constituent of ribosome [GO:0003735]                                                                                                                                                                                   |
| P51398 | poly(A) RNA binding [GO:0044822]; structural constituent of ribosome [GO:0003735]                                                                                                                                                                                   |
| P60866 | poly(A) RNA binding [GO:0044822]; structural constituent of ribosome [GO:0003735]                                                                                                                                                                                   |
| P62266 | poly(A) RNA binding [GO:0044822]; structural constituent of ribosome [GO:0003735]                                                                                                                                                                                   |
| P62906 | poly(A) RNA binding [GO:0044822]; structural constituent of ribosome [GO:0003735]                                                                                                                                                                                   |
| P62910 | poly(A) RNA binding [GO:0044822]; structural constituent of ribosome [GO:0003735]                                                                                                                                                                                   |
| P82675 | poly(A) RNA binding [GO:0044822]; structural constituent of ribosome [GO:0003735]                                                                                                                                                                                   |
| P82914 | poly(A) RNA binding [GO:0044822]; structural constituent of ribosome [GO:0003735]                                                                                                                                                                                   |
| P82921 | poly(A) RNA binding [GO:0044822]; structural constituent of ribosome [GO:0003735]                                                                                                                                                                                   |
| P82933 | poly(A) RNA binding [GO:0044822]; structural constituent of ribosome [GO:0003735]                                                                                                                                                                                   |
| P83881 | poly(A) RNA binding [GO:0044822]; structural constituent of ribosome [GO:0003735]                                                                                                                                                                                   |
| Q13084 | poly(A) RNA binding [GO:0044822]; structural constituent of ribosome [GO:0003735]                                                                                                                                                                                   |
| Q5T653 | poly(A) RNA binding [GO:0044822]; structural constituent of ribosome [GO:0003735]                                                                                                                                                                                   |
| Q8IXM3 | poly(A) RNA binding [GO:0044822]; structural constituent of ribosome [GO:0003735]                                                                                                                                                                                   |
| Q8N983 | poly(A) RNA binding [GO:0044822]; structural constituent of ribosome [GO:0003735]                                                                                                                                                                                   |
| Q96EL2 | poly(A) RNA binding [GO:0044822]; structural constituent of ribosome [GO:0003735]                                                                                                                                                                                   |
| Q96L21 | poly(A) RNA binding [GO:0044822]; structural constituent of ribosome [GO:0003735]                                                                                                                                                                                   |

|        |                                                                                                                                                                                                                                      |
|--------|--------------------------------------------------------------------------------------------------------------------------------------------------------------------------------------------------------------------------------------|
| Q9BYD2 | poly(A) RNA binding [GO:0044822]; structural constituent of ribosome [GO:0003735]                                                                                                                                                    |
| Q9BYD3 | poly(A) RNA binding [GO:0044822]; structural constituent of ribosome [GO:0003735]                                                                                                                                                    |
| Q9BYD6 | poly(A) RNA binding [GO:0044822]; structural constituent of ribosome [GO:0003735]                                                                                                                                                    |
| Q9BZE1 | poly(A) RNA binding [GO:0044822]; structural constituent of ribosome [GO:0003735]                                                                                                                                                    |
| Q9NP92 | poly(A) RNA binding [GO:0044822]; structural constituent of ribosome [GO:0003735]                                                                                                                                                    |
| Q9P015 | poly(A) RNA binding [GO:0044822]; structural constituent of ribosome [GO:0003735]                                                                                                                                                    |
| Q9P0M9 | poly(A) RNA binding [GO:0044822]; structural constituent of ribosome [GO:0003735]                                                                                                                                                    |
| Q9UNX3 | poly(A) RNA binding [GO:0044822]; structural constituent of ribosome [GO:0003735]                                                                                                                                                    |
| Q9Y3D9 | poly(A) RNA binding [GO:0044822]; structural constituent of ribosome [GO:0003735]                                                                                                                                                    |
| Q9Y6G3 | poly(A) RNA binding [GO:0044822]; structural constituent of ribosome [GO:0003735]                                                                                                                                                    |
| Q14152 | poly(A) RNA binding [GO:0044822]; structural molecule activity [GO:0005198]; translation initiation factor activity [GO:0003743]                                                                                                     |
| Q8IWA0 | poly(A) RNA binding [GO:0044822]; transcription cofactor activity [GO:0003712]                                                                                                                                                       |
| Q14690 | poly(A) RNA binding [GO:0044822]; transcription factor binding [GO:0008134]                                                                                                                                                          |
| P43897 | poly(A) RNA binding [GO:0044822]; translation elongation factor activity [GO:0003746]                                                                                                                                                |
| P78344 | poly(A) RNA binding [GO:0044822]; translation factor activity, RNA binding [GO:0008135]; translation initiation factor activity [GO:0003743]                                                                                         |
| O15371 | poly(A) RNA binding [GO:0044822]; translation initiation factor activity [GO:0003743]                                                                                                                                                |
| Q99613 | poly(A) RNA binding [GO:0044822]; translation initiation factor activity [GO:0003743]                                                                                                                                                |
| Q9Y262 | poly(A) RNA binding [GO:0044822]; translation initiation factor activity [GO:0003743]                                                                                                                                                |
| O75127 | poly(A) RNA binding [GO:0044822]; tRNA binding [GO:0000049]                                                                                                                                                                          |
| P09661 | poly(A) RNA binding [GO:0044822]; U2 snRNA binding [GO:0030620]                                                                                                                                                                      |
| O95777 | poly(A) RNA binding [GO:0044822]; U6 snRNA binding [GO:0017070]                                                                                                                                                                      |
| Q9Y4Z0 | poly(A) RNA binding [GO:0044822]; U6 snRNA binding [GO:0017070]                                                                                                                                                                      |
| A1L020 | poly(A) RNA binding [GO:0044822]; zinc ion binding [GO:0008270]                                                                                                                                                                      |
| Q12874 | poly(A) RNA binding [GO:0044822]; zinc ion binding [GO:0008270]                                                                                                                                                                      |
| Q5F1R6 | poly(A) RNA binding [GO:0044822]; zinc ion binding [GO:0008270]                                                                                                                                                                      |
| Q9HA38 | poly(A) RNA binding [GO:0044822]; zinc ion binding [GO:0008270]                                                                                                                                                                      |
| Q9NP64 | poly(A) RNA binding [GO:0044822]; zinc ion binding [GO:0008270]                                                                                                                                                                      |
| Q2I0M4 | potassium channel regulator activity [GO:0015459]                                                                                                                                                                                    |
| Q86WK6 | potassium channel regulator activity [GO:0015459]                                                                                                                                                                                    |
| O95391 | pre-mRNA 3'-splice site binding [GO:0030628]; second spliceosomal transesterification activity [GO:0000386]; zinc ion binding [GO:0008270]                                                                                           |
| O15205 | proteasome binding [GO:0070628]                                                                                                                                                                                                      |
| O94901 | protein anchor [GO:0043495]                                                                                                                                                                                                          |
| Q9NZU1 | protein binding, bridging [GO:0030674]; receptor signaling protein activity [GO:0005057]                                                                                                                                             |
| A9UHW6 | protein C-terminus binding [GO:0008022]; RNA binding [GO:0003723]                                                                                                                                                                    |
| Q13216 | protein complex binding [GO:0032403]                                                                                                                                                                                                 |
| Q9HAV0 | protein complex binding [GO:0032403]; signal transducer activity [GO:0004871]                                                                                                                                                        |
| Q15542 | protein dimerization activity [GO:0046983]; transcription factor activity, sequence-specific DNA binding [GO:0003700]; transcription regulatory region DNA binding [GO:0044212]                                                      |
| Q9NRX2 | protein domain specific binding [GO:0019904]; structural constituent of ribosome [GO:0003735]                                                                                                                                        |
| Q16625 | protein domain specific binding [GO:0019904]; thiopurine S-methyltransferase activity [GO:0008119]                                                                                                                                   |
| P52657 | protein heterodimerization activity [GO:0046982]; protein homodimerization activity [GO:0042803]; TBP-class protein binding [GO:0017025]; transcription coactivator activity [GO:0003713]; transcription factor binding [GO:0008134] |
| Q15399 | protein heterodimerization activity [GO:0046982]; receptor activity [GO:0004872]; transmembrane signaling receptor activity [GO:0004888]                                                                                             |

|        |                                                                                                                                                                                                                                                                                                                                                                                                                                                    |
|--------|----------------------------------------------------------------------------------------------------------------------------------------------------------------------------------------------------------------------------------------------------------------------------------------------------------------------------------------------------------------------------------------------------------------------------------------------------|
| P63272 | protein heterodimerization activity [GO:0046982]; transcription factor activity, sequence-specific DNA binding [GO:0003700]; zinc ion binding [GO:0008270]                                                                                                                                                                                                                                                                                         |
| Q8IW40 | protein homodimerization activity [GO:0042803]                                                                                                                                                                                                                                                                                                                                                                                                     |
| P12544 | protein homodimerization activity [GO:0042803]; serine-type endopeptidase activity [GO:0004252]                                                                                                                                                                                                                                                                                                                                                    |
| Q8N1B3 | protein kinase activator activity [GO:0030295]                                                                                                                                                                                                                                                                                                                                                                                                     |
| Q86WB0 | protein kinase binding [GO:0019901]; zinc ion binding [GO:0008270]                                                                                                                                                                                                                                                                                                                                                                                 |
| Q6NXT1 | protein kinase regulator activity [GO:0019887]                                                                                                                                                                                                                                                                                                                                                                                                     |
| Q9UI30 | protein methyltransferase activity [GO:0008276]                                                                                                                                                                                                                                                                                                                                                                                                    |
| Q92540 | protein phosphatase 2A binding [GO:0051721]                                                                                                                                                                                                                                                                                                                                                                                                        |
| Q9UPR3 | protein phosphatase 2A binding [GO:0051721]                                                                                                                                                                                                                                                                                                                                                                                                        |
| Q9UJX4 | protein phosphatase binding [GO:0019903]                                                                                                                                                                                                                                                                                                                                                                                                           |
| Q96I34 | protein phosphatase type 1 regulator activity [GO:0008599]                                                                                                                                                                                                                                                                                                                                                                                         |
| Q3MIX3 | protein serine/threonine kinase activity [GO:0004674]                                                                                                                                                                                                                                                                                                                                                                                              |
| Q96D53 | protein serine/threonine kinase activity [GO:0004674]                                                                                                                                                                                                                                                                                                                                                                                              |
| P05161 | protein tag [GO:0031386]                                                                                                                                                                                                                                                                                                                                                                                                                           |
| Q15306 | protein-lysine N-methyltransferase activity [GO:0016279]; RNA polymerase II core promoter proximal region sequence-specific DNA binding [GO:0000978]; sequence-specific DNA binding [GO:0043565]; transcriptional activator activity, RNA polymerase II core promoter proximal region sequence-specific binding [GO:0001077]; transcription factor activity, sequence-specific DNA binding [GO:0003700]; transcription factor binding [GO:0008134] |
| Q8N0Z8 | pseudouridine synthase activity [GO:0009982]; RNA binding [GO:0003723]                                                                                                                                                                                                                                                                                                                                                                             |
| Q8WWH5 | pseudouridine synthase activity [GO:0009982]; RNA binding [GO:0003723]                                                                                                                                                                                                                                                                                                                                                                             |
| Q9BZE2 | pseudouridine synthase activity [GO:0009982]; RNA binding [GO:0003723]                                                                                                                                                                                                                                                                                                                                                                             |
| Q9H0K6 | pseudouridine synthase activity [GO:0009982]; RNA binding [GO:0003723]                                                                                                                                                                                                                                                                                                                                                                             |
| Q9UJJ7 | pseudouridine synthase activity [GO:0009982]; RNA binding [GO:0003723]                                                                                                                                                                                                                                                                                                                                                                             |
| Q9H974 | queuine tRNA-ribosyltransferase activity [GO:0008479]; zinc ion binding [GO:0008270]                                                                                                                                                                                                                                                                                                                                                               |
| Q8TDJ6 | Rab GTPase binding [GO:0017137]                                                                                                                                                                                                                                                                                                                                                                                                                    |
| Q96LT7 | Rab GTPase binding [GO:0017137]                                                                                                                                                                                                                                                                                                                                                                                                                    |
| Q8WWB5 | Ral GTPase binding [GO:0017160]                                                                                                                                                                                                                                                                                                                                                                                                                    |
| O75325 | receptor activity [GO:0004872]                                                                                                                                                                                                                                                                                                                                                                                                                     |
| Q86UN2 | receptor activity [GO:0004872]                                                                                                                                                                                                                                                                                                                                                                                                                     |
| Q6IMN6 | receptor binding [GO:0005102]; RNA binding [GO:0003723]                                                                                                                                                                                                                                                                                                                                                                                            |
| Q02556 | regulatory region DNA binding [GO:0000975]; transcription factor activity, RNA polymerase II distal enhancer sequence-specific binding [GO:0003705]                                                                                                                                                                                                                                                                                                |
| Q13568 | regulatory region DNA binding [GO:0000975]; transcription factor activity, sequence-specific DNA binding [GO:0003700]                                                                                                                                                                                                                                                                                                                              |
| O75818 | ribonuclease P activity [GO:0004526]                                                                                                                                                                                                                                                                                                                                                                                                               |
| Q969H6 | ribonuclease P activity [GO:0004526]                                                                                                                                                                                                                                                                                                                                                                                                               |
| Q9GZL7 | ribonucleoprotein complex binding [GO:0043021]                                                                                                                                                                                                                                                                                                                                                                                                     |
| Q96E11 | ribosomal large subunit binding [GO:0043023]                                                                                                                                                                                                                                                                                                                                                                                                       |
| P56537 | ribosomal large subunit binding [GO:0043023]; ribosome binding [GO:0043022]; translation initiation factor activity [GO:0003743]                                                                                                                                                                                                                                                                                                                   |
| O75570 | ribosome binding [GO:0043022]; translation release factor activity [GO:0003747]; translation release factor activity, codon specific [GO:0016149]                                                                                                                                                                                                                                                                                                  |
| Q9UGC7 | ribosome binding [GO:0043022]; translation release factor activity, codon specific [GO:0016149]                                                                                                                                                                                                                                                                                                                                                    |
| A8MWD9 | RNA binding [GO:0003723]                                                                                                                                                                                                                                                                                                                                                                                                                           |
| O43310 | RNA binding [GO:0003723]                                                                                                                                                                                                                                                                                                                                                                                                                           |
| P61571 | RNA binding [GO:0003723]                                                                                                                                                                                                                                                                                                                                                                                                                           |



|        |                                                                                                                                                                                                      |
|--------|------------------------------------------------------------------------------------------------------------------------------------------------------------------------------------------------------|
| P61572 | RNA binding [GO:0003723]                                                                                                                                                                             |
| P61573 | RNA binding [GO:0003723]                                                                                                                                                                             |
| P61574 | RNA binding [GO:0003723]                                                                                                                                                                             |
| P61575 | RNA binding [GO:0003723]                                                                                                                                                                             |
| P61576 | RNA binding [GO:0003723]                                                                                                                                                                             |
| P61578 | RNA binding [GO:0003723]                                                                                                                                                                             |
| P61579 | RNA binding [GO:0003723]                                                                                                                                                                             |
| P62304 | RNA binding [GO:0003723]                                                                                                                                                                             |
| P62306 | RNA binding [GO:0003723]                                                                                                                                                                             |
| Q12872 | RNA binding [GO:0003723]                                                                                                                                                                             |
| Q15393 | RNA binding [GO:0003723]                                                                                                                                                                             |
| Q16576 | RNA binding [GO:0003723]                                                                                                                                                                             |
| Q69383 | RNA binding [GO:0003723]                                                                                                                                                                             |
| Q6I9Y2 | RNA binding [GO:0003723]                                                                                                                                                                             |
| Q7Z3Z3 | RNA binding [GO:0003723]                                                                                                                                                                             |
| Q8N9N2 | RNA binding [GO:0003723]                                                                                                                                                                             |
| Q8NI27 | RNA binding [GO:0003723]                                                                                                                                                                             |
| Q96J01 | RNA binding [GO:0003723]                                                                                                                                                                             |
| Q99547 | RNA binding [GO:0003723]                                                                                                                                                                             |
| Q9BUR4 | RNA binding [GO:0003723]                                                                                                                                                                             |
| Q9HAU5 | RNA binding [GO:0003723]                                                                                                                                                                             |
| Q9P013 | RNA binding [GO:0003723]                                                                                                                                                                             |
| Q9P2I0 | RNA binding [GO:0003723]                                                                                                                                                                             |
| Q9Y2W6 | RNA binding [GO:0003723]                                                                                                                                                                             |
| Q9Y3B2 | RNA binding [GO:0003723]                                                                                                                                                                             |
| Q9Y4Y9 | RNA binding [GO:0003723]                                                                                                                                                                             |
| Q13395 | RNA binding [GO:0003723]; RNA methyltransferase activity [GO:0008173]                                                                                                                                |
| P32969 | RNA binding [GO:0003723]; rRNA binding [GO:0019843]; structural constituent of ribosome [GO:0003735]                                                                                                 |
| P49207 | RNA binding [GO:0003723]; structural constituent of ribosome [GO:0003735]                                                                                                                            |
| P52815 | RNA binding [GO:0003723]; structural constituent of ribosome [GO:0003735]                                                                                                                            |
| P62861 | RNA binding [GO:0003723]; structural constituent of ribosome [GO:0003735]                                                                                                                            |
| P62891 | RNA binding [GO:0003723]; structural constituent of ribosome [GO:0003735]                                                                                                                            |
| Q96EH5 | RNA binding [GO:0003723]; structural constituent of ribosome [GO:0003735]                                                                                                                            |
| Q9H814 | RNA binding [GO:0003723]; toxic substance binding [GO:0015643]                                                                                                                                       |
| Q9H074 | RNA binding [GO:0003723]; translation activator activity [GO:0008494]                                                                                                                                |
| Q8WY41 | RNA binding [GO:0003723]; translation repressor activity [GO:0030371]; zinc ion binding [GO:0008270]                                                                                                 |
| P60323 | RNA binding [GO:0003723]; zinc ion binding [GO:0008270]                                                                                                                                              |
| Q03924 | RNA polymerase II core promoter proximal region sequence-specific DNA binding [GO:0000978]; transcription factor activity, sequence-specific DNA binding [GO:0003700]; zinc ion binding [GO:0008270] |
| Q03936 | RNA polymerase II core promoter proximal region sequence-specific DNA binding [GO:0000978]; transcription factor activity, sequence-specific DNA binding [GO:0003700]; zinc ion binding [GO:0008270] |
| Q03938 | RNA polymerase II core promoter proximal region sequence-specific DNA binding [GO:0000978]; transcription factor activity, sequence-specific DNA binding [GO:0003700]; zinc ion binding [GO:0008270] |

|        |                                                                                                                                                                                                                                                                                                     |
|--------|-----------------------------------------------------------------------------------------------------------------------------------------------------------------------------------------------------------------------------------------------------------------------------------------------------|
| O75346 | RNA polymerase II core promoter proximal region sequence-specific DNA binding [GO:0000978]; zinc ion binding [GO:0008270]                                                                                                                                                                           |
| Q9NQX6 | RNA polymerase II core promoter proximal region sequence-specific DNA binding [GO:0000978]; zinc ion binding [GO:0008270]                                                                                                                                                                           |
| Q9Y2Q1 | RNA polymerase II core promoter proximal region sequence-specific DNA binding [GO:0000978]; zinc ion binding [GO:0008270]                                                                                                                                                                           |
| Q99684 | RNA polymerase II regulatory region sequence-specific DNA binding [GO:0000977]; transcriptional repressor activity, RNA polymerase II core promoter proximal region sequence-specific binding [GO:0001078]; transcription regulatory region DNA binding [GO:0044212]; zinc ion binding [GO:0008270] |
| Q9ULH7 | RNA polymerase II transcription coactivator activity [GO:0001105]; transcription coactivator activity [GO:0003713]; transcription factor activity, sequence-specific DNA binding [GO:0003700]                                                                                                       |
| Q9Y3C7 | RNA polymerase II transcription cofactor activity [GO:0001104]; transcription coactivator activity [GO:0003713]; ubiquitin protein ligase activity [GO:0061630]                                                                                                                                     |
| Q8NBJ9 | RNA transmembrane transporter activity [GO:0051033]                                                                                                                                                                                                                                                 |
| Q9NXL6 | RNA transmembrane transporter activity [GO:0051033]                                                                                                                                                                                                                                                 |
| Q96RS0 | RNA trimethylguanosine synthase activity [GO:0071164]                                                                                                                                                                                                                                               |
| Q5TBB1 | RNA-DNA hybrid ribonuclease activity [GO:0004523]                                                                                                                                                                                                                                                   |
| Q9UI43 | rRNA (uridine-2'-O-)-methyltransferase activity [GO:0008650]                                                                                                                                                                                                                                        |
| Q9NX20 | rRNA binding [GO:0019843]; structural constituent of ribosome [GO:0003735]                                                                                                                                                                                                                          |
| Q9Y2R5 | rRNA binding [GO:0019843]; structural constituent of ribosome [GO:0003735]                                                                                                                                                                                                                          |
| Q96GJ1 | S-adenosylmethionine-dependent tRNA (m5U54) methyltransferase activity [GO:0030697]                                                                                                                                                                                                                 |
| P98073 | scavenger receptor activity [GO:0005044]; serine-type endopeptidase activity [GO:0004252]                                                                                                                                                                                                           |
| Q9BYE2 | scavenger receptor activity [GO:0005044]; serine-type endopeptidase activity [GO:0004252]                                                                                                                                                                                                           |
| Q9NRS4 | scavenger receptor activity [GO:0005044]; serine-type endopeptidase activity [GO:0004252]                                                                                                                                                                                                           |
| O15393 | scavenger receptor activity [GO:0005044]; serine-type endopeptidase activity [GO:0004252]; serine-type peptidase activity [GO:0008236]                                                                                                                                                              |
| P56730 | scavenger receptor activity [GO:0005044]; serine-type endopeptidase activity [GO:0004252]; serine-type peptidase activity [GO:0008236]                                                                                                                                                              |
| P57727 | scavenger receptor activity [GO:0005044]; serine-type endopeptidase activity [GO:0004252]; sodium channel regulator activity [GO:0017080]                                                                                                                                                           |
| P58546 | sequence-specific DNA binding [GO:0043565]                                                                                                                                                                                                                                                          |
| Q96JY0 | sequence-specific DNA binding [GO:0043565]                                                                                                                                                                                                                                                          |
| P08217 | serine hydrolase activity [GO:0017171]; serine-type endopeptidase activity [GO:0004252]                                                                                                                                                                                                             |
| A1L453 | serine-type endopeptidase activity [GO:0004252]                                                                                                                                                                                                                                                     |
| A6NIE9 | serine-type endopeptidase activity [GO:0004252]                                                                                                                                                                                                                                                     |
| A8MTI9 | serine-type endopeptidase activity [GO:0004252]                                                                                                                                                                                                                                                     |
| E5RG02 | serine-type endopeptidase activity [GO:0004252]                                                                                                                                                                                                                                                     |
| E7EML9 | serine-type endopeptidase activity [GO:0004252]                                                                                                                                                                                                                                                     |
| O60259 | serine-type endopeptidase activity [GO:0004252]                                                                                                                                                                                                                                                     |
| P00749 | serine-type endopeptidase activity [GO:0004252]                                                                                                                                                                                                                                                     |
| P03952 | serine-type endopeptidase activity [GO:0004252]                                                                                                                                                                                                                                                     |
| P06870 | serine-type endopeptidase activity [GO:0004252]                                                                                                                                                                                                                                                     |
| P08218 | serine-type endopeptidase activity [GO:0004252]                                                                                                                                                                                                                                                     |
| P09093 | serine-type endopeptidase activity [GO:0004252]                                                                                                                                                                                                                                                     |
| P0CW18 | serine-type endopeptidase activity [GO:0004252]                                                                                                                                                                                                                                                     |
| P17538 | serine-type endopeptidase activity [GO:0004252]                                                                                                                                                                                                                                                     |
| P20151 | serine-type endopeptidase activity [GO:0004252]                                                                                                                                                                                                                                                     |
| P40313 | serine-type endopeptidase activity [GO:0004252]                                                                                                                                                                                                                                                     |

|        |                                                                                              |
|--------|----------------------------------------------------------------------------------------------|
| Q2L4Q9 | serine-type endopeptidase activity [GO:0004252]                                              |
| Q5K4E3 | serine-type endopeptidase activity [GO:0004252]                                              |
| Q6GPI1 | serine-type endopeptidase activity [GO:0004252]                                              |
| Q6UWB4 | serine-type endopeptidase activity [GO:0004252]                                              |
| Q6ZMR5 | serine-type endopeptidase activity [GO:0004252]                                              |
| Q6ZWK6 | serine-type endopeptidase activity [GO:0004252]                                              |
| Q7RTY3 | serine-type endopeptidase activity [GO:0004252]                                              |
| Q7RTY5 | serine-type endopeptidase activity [GO:0004252]                                              |
| Q7RTY9 | serine-type endopeptidase activity [GO:0004252]                                              |
| Q7Z410 | serine-type endopeptidase activity [GO:0004252]                                              |
| Q7Z5A4 | serine-type endopeptidase activity [GO:0004252]                                              |
| Q86WS5 | serine-type endopeptidase activity [GO:0004252]                                              |
| Q8IU80 | serine-type endopeptidase activity [GO:0004252]                                              |
| Q8IYP2 | serine-type endopeptidase activity [GO:0004252]                                              |
| Q8NF86 | serine-type endopeptidase activity [GO:0004252]                                              |
| Q92876 | serine-type endopeptidase activity [GO:0004252]                                              |
| Q9BQR3 | serine-type endopeptidase activity [GO:0004252]                                              |
| Q9GZN4 | serine-type endopeptidase activity [GO:0004252]                                              |
| Q9NZP8 | serine-type endopeptidase activity [GO:0004252]                                              |
| Q9P0G3 | serine-type endopeptidase activity [GO:0004252]                                              |
| Q9UKQ9 | serine-type endopeptidase activity [GO:0004252]                                              |
| Q9Y5Q5 | serine-type endopeptidase activity [GO:0004252]                                              |
| O43240 | serine-type endopeptidase activity [GO:0004252]; serine-type peptidase activity [GO:0008236] |
| P00746 | serine-type endopeptidase activity [GO:0004252]; serine-type peptidase activity [GO:0008236] |
| P20231 | serine-type endopeptidase activity [GO:0004252]; serine-type peptidase activity [GO:0008236] |
| P49863 | serine-type endopeptidase activity [GO:0004252]; serine-type peptidase activity [GO:0008236] |
| P51124 | serine-type endopeptidase activity [GO:0004252]; serine-type peptidase activity [GO:0008236] |
| Q04756 | serine-type endopeptidase activity [GO:0004252]; serine-type peptidase activity [GO:0008236] |
| Q15661 | serine-type endopeptidase activity [GO:0004252]; serine-type peptidase activity [GO:0008236] |
| Q16651 | serine-type endopeptidase activity [GO:0004252]; serine-type peptidase activity [GO:0008236] |
| Q7RTY8 | serine-type endopeptidase activity [GO:0004252]; serine-type peptidase activity [GO:0008236] |
| Q86T26 | serine-type endopeptidase activity [GO:0004252]; serine-type peptidase activity [GO:0008236] |
| Q9BZJ3 | serine-type endopeptidase activity [GO:0004252]; serine-type peptidase activity [GO:0008236] |
| Q9H2R5 | serine-type endopeptidase activity [GO:0004252]; serine-type peptidase activity [GO:0008236] |
| Q9NRR2 | serine-type endopeptidase activity [GO:0004252]; serine-type peptidase activity [GO:0008236] |
| Q9UBX7 | serine-type endopeptidase activity [GO:0004252]; serine-type peptidase activity [GO:0008236] |
| Q9UL52 | serine-type endopeptidase activity [GO:0004252]; serine-type peptidase activity [GO:0008236] |
| Q9Y5Y6 | serine-type endopeptidase activity [GO:0004252]; serine-type peptidase activity [GO:0008236] |
| Q9Y6M0 | serine-type endopeptidase activity [GO:0004252]; serine-type peptidase activity [GO:0008236] |
| O60262 | signal transducer activity [GO:0004871]                                                      |
| P50150 | signal transducer activity [GO:0004871]                                                      |
| Q8WWH4 | signal transducer activity [GO:0004871]                                                      |
| Q15653 | signal transducer activity [GO:0004871]; transcription coactivator activity [GO:0003713]     |
| Q9NPE3 | snoRNA binding [GO:0030515]                                                                  |

|        |                                                                                                                            |
|--------|----------------------------------------------------------------------------------------------------------------------------|
| Q9NYH9 | snoRNA binding [GO:0030515]                                                                                                |
| O75694 | structural constituent of nuclear pore [GO:0017056]; transporter activity [GO:0005215]                                     |
| O75394 | structural constituent of ribosome [GO:0003735]                                                                            |
| P49406 | structural constituent of ribosome [GO:0003735]                                                                            |
| P62987 | structural constituent of ribosome [GO:0003735]                                                                            |
| P82650 | structural constituent of ribosome [GO:0003735]                                                                            |
| P82663 | structural constituent of ribosome [GO:0003735]                                                                            |
| Q4U2R6 | structural constituent of ribosome [GO:0003735]                                                                            |
| Q59GN2 | structural constituent of ribosome [GO:0003735]                                                                            |
| Q7Z7F7 | structural constituent of ribosome [GO:0003735]                                                                            |
| Q969Q0 | structural constituent of ribosome [GO:0003735]                                                                            |
| Q96A35 | structural constituent of ribosome [GO:0003735]                                                                            |
| Q9BQ48 | structural constituent of ribosome [GO:0003735]                                                                            |
| Q9BQC6 | structural constituent of ribosome [GO:0003735]                                                                            |
| Q9NVS2 | structural constituent of ribosome [GO:0003735]                                                                            |
| Q9Y291 | structural constituent of ribosome [GO:0003735]                                                                            |
| Q9Y399 | structural constituent of ribosome [GO:0003735]                                                                            |
| Q9Y3D3 | structural constituent of ribosome [GO:0003735]                                                                            |
| Q9Y3D5 | structural constituent of ribosome [GO:0003735]                                                                            |
| Q9Y676 | structural constituent of ribosome [GO:0003735]                                                                            |
| P62273 | structural constituent of ribosome [GO:0003735]; zinc ion binding [GO:0008270]                                             |
| O71037 | structural molecule activity [GO:0005198]                                                                                  |
| P35606 | structural molecule activity [GO:0005198]                                                                                  |
| P53621 | structural molecule activity [GO:0005198]                                                                                  |
| P61565 | structural molecule activity [GO:0005198]                                                                                  |
| P61570 | structural molecule activity [GO:0005198]                                                                                  |
| Q69384 | structural molecule activity [GO:0005198]                                                                                  |
| Q902F8 | structural molecule activity [GO:0005198]                                                                                  |
| Q902F9 | structural molecule activity [GO:0005198]                                                                                  |
| Q9UKH3 | structural molecule activity [GO:0005198]                                                                                  |
| Q96BK5 | telomerase inhibitor activity [GO:0010521]; telomeric RNA binding [GO:0070034]                                             |
| Q9UI38 | threonine-type endopeptidase activity [GO:0004298]                                                                         |
| Q86SG2 | titin binding [GO:0031432]                                                                                                 |
| O75529 | transcription coactivator activity [GO:0003713]; transcription factor activity, sequence-specific DNA binding [GO:0003700] |
| Q04725 | transcription corepressor activity [GO:0003714]                                                                            |
| P54198 | transcription corepressor activity [GO:0003714]; transcription factor activity, sequence-specific DNA binding [GO:0003700] |
| O75971 | transcription factor activity, sequence-specific DNA binding [GO:0003700]                                                  |
| Q13487 | transcription factor activity, sequence-specific DNA binding [GO:0003700]                                                  |
| O75832 | transcription factor binding [GO:0008134]                                                                                  |
| Q4LE39 | transcription regulatory region DNA binding [GO:0044212]                                                                   |
| Q9HD40 | transferase activity, transferring selenium-containing groups [GO:0016785]; tRNA binding [GO:0000049]                      |
| Q6EMK4 | transforming growth factor beta binding [GO:0050431]                                                                       |
| A6NMX2 | translation initiation factor activity [GO:0003743]                                                                        |

|        |                                                                                                         |
|--------|---------------------------------------------------------------------------------------------------------|
| B5ME19 | translation initiation factor activity [GO:0003743]                                                     |
| O75822 | translation initiation factor activity [GO:0003743]                                                     |
| Q13347 | translation initiation factor activity [GO:0003743]                                                     |
| Q8N5X7 | translation initiation factor activity [GO:0003743]                                                     |
| Q9ULC4 | translation initiation factor activity [GO:0003743]                                                     |
| Q9UI10 | translation initiation factor activity [GO:0003743]; translation initiation factor binding [GO:0031369] |
| O75312 | translation initiation factor binding [GO:0031369]; zinc ion binding [GO:0008270]                       |
| Q9BXR5 | transmembrane signaling receptor activity [GO:0004888]                                                  |
| Q9HBX8 | transmembrane signaling receptor activity [GO:0004888]                                                  |
| Q96FX7 | tRNA (adenine-N1-)-methyltransferase activity [GO:0016429]                                              |
| Q9BVS5 | tRNA (adenine-N1-)-methyltransferase activity [GO:0016429]                                              |
| Q32P41 | tRNA (guanine(37)-N(1))-methyltransferase activity [GO:0052906]                                         |
| Q86TN4 | tRNA 2'-phosphotransferase activity [GO:0000215]                                                        |
| O43592 | tRNA binding [GO:0000049]                                                                               |
| Q9UET6 | tRNA methyltransferase activity [GO:0008175]                                                            |
| Q8WW01 | tRNA-intron endonuclease activity [GO:0000213]                                                          |
| Q7Z6V5 | tRNA-specific adenosine deaminase activity [GO:0008251]; zinc ion binding [GO:0008270]                  |
| O43172 | U4 snRNA binding [GO:0030621]; U6 snRNA binding [GO:0017070]                                            |
| Q9UK45 | U6 snRNA binding [GO:0017070]                                                                           |
| P24863 | ubiquitin protein ligase activity [GO:0061630]                                                          |
| Q96Q27 | ubiquitin protein ligase activity [GO:0061630]                                                          |
| Q9NPI8 | ubiquitin protein ligase activity [GO:0061630]                                                          |
| Q9UKB1 | ubiquitin protein ligase activity [GO:0061630]; ubiquitin-protein transferase activity [GO:0004842]     |
| Q15843 | ubiquitin protein ligase binding [GO:0031625]                                                           |
| Q8N9V3 | ubiquitin-protein transferase activity [GO:0004842]                                                     |
| Q9UKT8 | ubiquitin-protein transferase activity [GO:0004842]                                                     |
| A6NCQ9 | zinc ion binding [GO:0008270]                                                                           |
| Q6PJ69 | zinc ion binding [GO:0008270]                                                                           |
| Q6ZSG1 | zinc ion binding [GO:0008270]                                                                           |
| Q7L0R7 | zinc ion binding [GO:0008270]                                                                           |
| Q86XD8 | zinc ion binding [GO:0008270]                                                                           |
| Q8N7C7 | zinc ion binding [GO:0008270]                                                                           |
| Q8WWF5 | zinc ion binding [GO:0008270]                                                                           |
| Q9H0A6 | zinc ion binding [GO:0008270]                                                                           |
| Q9H9V4 | zinc ion binding [GO:0008270]                                                                           |
| Q9ULK6 | zinc ion binding [GO:0008270]                                                                           |
| Q9Y225 | zinc ion binding [GO:0008270]                                                                           |
| Q9Y6U7 | zinc ion binding [GO:0008270]                                                                           |
| A2AJT9 | No functional annotation available                                                                      |
| A2RRH5 | No functional annotation available                                                                      |
| A4D1P6 | No functional annotation available                                                                      |
| A5A3E0 | No functional annotation available                                                                      |
| A6NC57 | No functional annotation available                                                                      |
| A6NC97 | No functional annotation available                                                                      |

|        |                                    |
|--------|------------------------------------|
| A6NDN8 | No functional annotation available |
| A6NE52 | No functional annotation available |
| A6NG73 | No functional annotation available |
| A6NGE4 | No functional annotation available |
| A6NGH8 | No functional annotation available |
| A6NHY2 | No functional annotation available |
| A6NI47 | No functional annotation available |
| A6NJ16 | No functional annotation available |
| A6NJS3 | No functional annotation available |
| A6NK39 | No functional annotation available |
| A6NK59 | No functional annotation available |
| A6NKF1 | No functional annotation available |
| A6NNA2 | No functional annotation available |
| A6QL64 | No functional annotation available |
| A6XGL0 | No functional annotation available |
| A7E2S9 | No functional annotation available |
| A8MQB9 | No functional annotation available |
| A8MSY0 | No functional annotation available |
| A8MYG8 | No functional annotation available |
| B1ANS9 | No functional annotation available |
| B2RU33 | No functional annotation available |
| B4E2M5 | No functional annotation available |
| B9A064 | No functional annotation available |
| E5RJM6 | No functional annotation available |
| H3BUK9 | No functional annotation available |
| O00241 | No functional annotation available |
| O00472 | No functional annotation available |
| O14498 | No functional annotation available |
| O15084 | No functional annotation available |
| O15335 | No functional annotation available |
| O43300 | No functional annotation available |
| O43379 | No functional annotation available |
| O43660 | No functional annotation available |
| O43684 | No functional annotation available |
| O60336 | No functional annotation available |
| O60583 | No functional annotation available |
| O60938 | No functional annotation available |
| O75054 | No functional annotation available |
| O75083 | No functional annotation available |
| O76071 | No functional annotation available |
| O94898 | No functional annotation available |
| O94933 | No functional annotation available |
| O94967 | No functional annotation available |
| O94991 | No functional annotation available |

|        |                                    |
|--------|------------------------------------|
| O95170 | No functional annotation available |
| P02750 | No functional annotation available |
| P0C6S8 | No functional annotation available |
| P0C7Q3 | No functional annotation available |
| P0C7V8 | No functional annotation available |
| P0CF75 | No functional annotation available |
| P0CG38 | No functional annotation available |
| P0CG39 | No functional annotation available |
| P0CG47 | No functional annotation available |
| P12018 | No functional annotation available |
| P15814 | No functional annotation available |
| P23515 | No functional annotation available |
| P26927 | No functional annotation available |
| P40197 | No functional annotation available |
| P55735 | No functional annotation available |
| P57775 | No functional annotation available |
| P60896 | No functional annotation available |
| P61964 | No functional annotation available |
| P78324 | No functional annotation available |
| P82664 | No functional annotation available |
| P82930 | No functional annotation available |
| Q04726 | No functional annotation available |
| Q13610 | No functional annotation available |
| Q13641 | No functional annotation available |
| Q14160 | No functional annotation available |
| Q14392 | No functional annotation available |
| Q14591 | No functional annotation available |
| Q14667 | No functional annotation available |
| Q2TAY7 | No functional annotation available |
| Q32P44 | No functional annotation available |
| Q3KP44 | No functional annotation available |
| Q3MHD2 | No functional annotation available |
| Q3MJ13 | No functional annotation available |
| Q495B1 | No functional annotation available |
| Q4UJ75 | No functional annotation available |
| Q50LG9 | No functional annotation available |
| Q53HC9 | No functional annotation available |
| Q5CZ79 | No functional annotation available |
| Q5JSH3 | No functional annotation available |
| Q5JTN6 | No functional annotation available |
| Q5JVS0 | No functional annotation available |
| Q5QP82 | No functional annotation available |
| Q5SQ80 | No functional annotation available |
| Q5T5J6 | No functional annotation available |

|        |                                    |
|--------|------------------------------------|
| Q5T7N3 | No functional annotation available |
| Q5T8I3 | No functional annotation available |
| Q5T9C2 | No functional annotation available |
| Q5TAP6 | No functional annotation available |
| Q5TAQ9 | No functional annotation available |
| Q5TFQ8 | No functional annotation available |
| Q5TYW2 | No functional annotation available |
| Q5UIP0 | No functional annotation available |
| Q5VT99 | No functional annotation available |
| Q5VUR7 | No functional annotation available |
| Q5XUX1 | No functional annotation available |
| Q5XX13 | No functional annotation available |
| Q64LD2 | No functional annotation available |
| Q68DC2 | No functional annotation available |
| Q6P2I7 | No functional annotation available |
| Q6P6B7 | No functional annotation available |
| Q6P9B9 | No functional annotation available |
| Q6PEZ8 | No functional annotation available |
| Q6PJI9 | No functional annotation available |
| Q6RI45 | No functional annotation available |
| Q6RSH7 | No functional annotation available |
| Q6S545 | No functional annotation available |
| Q6S5H4 | No functional annotation available |
| Q6S5H5 | No functional annotation available |
| Q6S8J3 | No functional annotation available |
| Q6S8J7 | No functional annotation available |
| Q6UB98 | No functional annotation available |
| Q6UXH9 | No functional annotation available |
| Q6UXK2 | No functional annotation available |
| Q6UXK5 | No functional annotation available |
| Q6UXM1 | No functional annotation available |
| Q6UY18 | No functional annotation available |
| Q6WRI0 | No functional annotation available |
| Q6ZMW3 | No functional annotation available |
| Q6ZMY6 | No functional annotation available |
| Q6ZNQ3 | No functional annotation available |
| Q6ZSA7 | No functional annotation available |
| Q6ZVH7 | No functional annotation available |
| Q6ZW76 | No functional annotation available |
| Q7L985 | No functional annotation available |
| Q7Z2Q7 | No functional annotation available |
| Q7Z5U6 | No functional annotation available |
| Q86SJ2 | No functional annotation available |
| Q86TI4 | No functional annotation available |



|        |                                    |
|--------|------------------------------------|
| Q86UE6 | No functional annotation available |
| Q86VH4 | No functional annotation available |
| Q86VH5 | No functional annotation available |
| Q86VZ2 | No functional annotation available |
| Q86WK7 | No functional annotation available |
| Q86Y33 | No functional annotation available |
| Q86YC3 | No functional annotation available |
| Q86YR6 | No functional annotation available |
| Q8IV35 | No functional annotation available |
| Q8IVF6 | No functional annotation available |
| Q8IW52 | No functional annotation available |
| Q8IZU2 | No functional annotation available |
| Q8N0X2 | No functional annotation available |
| Q8N136 | No functional annotation available |
| Q8N1V2 | No functional annotation available |
| Q8N283 | No functional annotation available |
| Q8N2M8 | No functional annotation available |
| Q8N2N9 | No functional annotation available |
| Q8N3D4 | No functional annotation available |
| Q8N3Y1 | No functional annotation available |
| Q8N4S9 | No functional annotation available |
| Q8N5N7 | No functional annotation available |
| Q8N6D5 | No functional annotation available |
| Q8N6Y2 | No functional annotation available |
| Q8N7Z5 | No functional annotation available |
| Q8N8A2 | No functional annotation available |
| Q8N967 | No functional annotation available |
| Q8N9B4 | No functional annotation available |
| Q8N9N7 | No functional annotation available |
| Q8NA23 | No functional annotation available |
| Q8NAA4 | No functional annotation available |
| Q8NAT2 | No functional annotation available |
| Q8NB46 | No functional annotation available |
| Q8NBT0 | No functional annotation available |
| Q8NDI1 | No functional annotation available |
| Q8NFH5 | No functional annotation available |
| Q8NHV4 | No functional annotation available |
| Q8NHW5 | No functional annotation available |
| Q8TAE8 | No functional annotation available |
| Q8TAF3 | No functional annotation available |
| Q8TC44 | No functional annotation available |
| Q8TC84 | No functional annotation available |
| Q8TDP1 | No functional annotation available |
| Q8TE02 | No functional annotation available |

|         |                                    |
|---------|------------------------------------|
| Q8TEB1  | No functional annotation available |
| Q8TF21  | No functional annotation available |
| Q8WUA8  | No functional annotation available |
| Q8WUD4  | No functional annotation available |
| Q8WUE5  | No functional annotation available |
| Q8WUF8  | No functional annotation available |
| Q8WVC0  | No functional annotation available |
| Q8WXD9  | No functional annotation available |
| Q8WXE0  | No functional annotation available |
| Q8WXI3  | No functional annotation available |
| Q8W XK1 | No functional annotation available |
| Q8W XK3 | No functional annotation available |
| Q8WZ74  | No functional annotation available |
| Q92527  | No functional annotation available |
| Q92625  | No functional annotation available |
| Q92733  | No functional annotation available |
| Q96EL3  | No functional annotation available |
| Q96FE5  | No functional annotation available |
| Q96FK6  | No functional annotation available |
| Q96GC5  | No functional annotation available |
| Q96JA1  | No functional annotation available |
| Q96JK2  | No functional annotation available |
| Q96JP0  | No functional annotation available |
| Q96KV7  | No functional annotation available |
| Q96MR6  | No functional annotation available |
| Q96MT7  | No functional annotation available |
| Q96NI6  | No functional annotation available |
| Q96NS5  | No functional annotation available |
| Q96PV6  | No functional annotation available |
| Q96PX8  | No functional annotation available |
| Q96S15  | No functional annotation available |
| Q96S94  | No functional annotation available |
| Q99467  | No functional annotation available |
| Q99633  | No functional annotation available |
| Q99983  | No functional annotation available |
| Q9BRA0  | No functional annotation available |
| Q9BRP4  | No functional annotation available |
| Q9BRX9  | No functional annotation available |
| Q9BTN0  | No functional annotation available |
| Q9BV38  | No functional annotation available |
| Q9BVC4  | No functional annotation available |
| Q9BVC5  | No functional annotation available |
| Q9BWJ5  | No functional annotation available |
| Q9BXX2  | No functional annotation available |

|        |                                    |
|--------|------------------------------------|
| Q9BYB4 | No functional annotation available |
| Q9BZF9 | No functional annotation available |
| Q9BZL4 | No functional annotation available |
| Q9C0D5 | No functional annotation available |
| Q9GZS3 | No functional annotation available |
| Q9GZU5 | No functional annotation available |
| Q9H0H0 | No functional annotation available |
| Q9H156 | No functional annotation available |
| Q9H1Z4 | No functional annotation available |
| Q9H3W5 | No functional annotation available |
| Q9H560 | No functional annotation available |
| Q9H5Y7 | No functional annotation available |
| Q9H607 | No functional annotation available |
| Q9H672 | No functional annotation available |
| Q9H6T3 | No functional annotation available |
| Q9H6Y2 | No functional annotation available |
| Q9H765 | No functional annotation available |
| Q9H7D7 | No functional annotation available |
| Q9H7Z3 | No functional annotation available |
| Q9H808 | No functional annotation available |
| Q9H9A6 | No functional annotation available |
| Q9H9V9 | No functional annotation available |
| Q9HAD4 | No functional annotation available |
| Q9HBG6 | No functional annotation available |
| Q9HBL6 | No functional annotation available |
| Q9HBW1 | No functional annotation available |
| Q9HC35 | No functional annotation available |
| Q9HCD6 | No functional annotation available |
| Q9HCJ2 | No functional annotation available |
| Q9NQ39 | No functional annotation available |
| Q9NSI2 | No functional annotation available |
| Q9NSI6 | No functional annotation available |
| Q9NSQ0 | No functional annotation available |
| Q9NT99 | No functional annotation available |
| Q9NVR5 | No functional annotation available |
| Q9NVX2 | No functional annotation available |
| Q9NWS0 | No functional annotation available |
| Q9NWT1 | No functional annotation available |
| Q9NWT8 | No functional annotation available |
| Q9NWX5 | No functional annotation available |
| Q9NWZ8 | No functional annotation available |
| Q9NYS7 | No functional annotation available |
| Q9NZJ0 | No functional annotation available |
| Q9P016 | No functional annotation available |

|        |                                    |
|--------|------------------------------------|
| Q9P0K7 | No functional annotation available |
| Q9P1W8 | No functional annotation available |
| Q9P244 | No functional annotation available |
| Q9P2H3 | No functional annotation available |
| Q9UJK0 | No functional annotation available |
| Q9UK58 | No functional annotation available |
| Q9UKI3 | No functional annotation available |
| Q9ULH4 | No functional annotation available |
| Q9ULI1 | No functional annotation available |
| Q9ULJ7 | No functional annotation available |
| Q9UM11 | No functional annotation available |
| Q9Y283 | No functional annotation available |
| Q9Y2G4 | No functional annotation available |
| Q9Y2I8 | No functional annotation available |
| Q9Y312 | No functional annotation available |
| Q9Y4E6 | No functional annotation available |
| Q9Y575 | No functional annotation available |
| Q9Y6I7 | No functional annotation available |
