# Supplementary material for: Genome-wide survey of putative RNA-binding proteins encoded in the human proteome
Source: Royal Society of Chemistry journal article supplement (doi:10.1039/c5mb00638d), 2015-11-30
Supplement: c5mb00638d1.zip [file c5mb00638d1.zip]

**Supplementary Table 3:** Benchmarking results for our study using Pfam HMMs. The RNA-binding domains (RBDs) are represented in blue font.

| Entry  | Domain architecture predicted by our method                                               | Pfam domain architecture                                                                    | Benchmarking status |
|--------|-------------------------------------------------------------------------------------------|---------------------------------------------------------------------------------------------|---------------------|
| Q6P158 | DEAD~HA2~OB_NTP_bind                                                                      | RWD~DEAD~Helicase_C~HA2~OB_NTP_bind                                                         | Benchmarked         |
| Q9NV66 | Wyosine_form                                                                              | Flavodoxin_1~Radical_SAM~Wyosine_form                                                       | Benchmarked         |
| P07814 | tRNA-synt_1c~tRNA-synt_1c_C~tRNA-synt_2b~HGTP_anticodon~ProRS-C_1                         | GST_C_3~tRNA-synt_1c~tRNA-synt_1c_C~WHEP-TRS~WHEP-TRS~tRNA-synt_2b~HGTP_anticodon~ProRS-C_1 | Benchmarked         |
| Q9UL40 | zf-met~zf-met~zf-met~zf-met                                                               | zf-met~zf-met~zf-met~zf-met                                                                 | Benchmarked         |
| O15457 | MutS_II                                                                                   | MutS_II~MutS_III~MutS_V                                                                     | Benchmarked         |
| Q8WYQ5 | dsrm~dsrm                                                                                 | dsrm~dsrm                                                                                   | Benchmarked         |
| Q9NR30 | DEAD~GUCT                                                                                 | DEAD~Helicase_C~GUCT                                                                        | Benchmarked         |
| P56182 | Nop52                                                                                     | Nop52                                                                                       | Benchmarked         |
| O75127 | PPR~PPR~PPR_3~PPR~PPR_3~PPR                                                               | PPR_2~PPR_2~PPR_2~PPR_2~PPR_2                                                               | Not Benchmarked     |
| P15170 | GTP_EFTU~GTP_EFTU_D3                                                                      | GTP_EFTU~GTP_EFTU_D3                                                                        | Benchmarked         |
| Q8WW27 | APOBEC_N                                                                                  | APOBEC_N                                                                                    | Benchmarked         |
| O43432 | MIF4G                                                                                     | MIF4G~MA3~W2                                                                                | Benchmarked         |
| O75648 | tRNA_Me_trans                                                                             | tRNA_Me_trans                                                                               | Benchmarked         |
| Q9NW08 | RNA_pol_Rpb2_1~RNA_pol_Rpb2_3~RNA_pol_Rpb2_4~RNA_pol_Rpb2_5~RNA_pol_Rpb2_6~RNA_pol_Rpb2_7 | RNA_pol_Rpb2_1~RNA_pol_Rpb2_3~RNA_pol_Rpb2_4~RNA_pol_Rpb2_5~RNA_pol_Rpb2_6~RNA_pol_Rpb2_7   | Benchmarked         |
| Q5ST30 | tRNA-synt_1~Anticodon_1                                                                   | tRNA-synt_1~Anticodon_1                                                                     | Benchmarked         |
| Q15650 | ASCH                                                                                      | zf-C2HC5~ASCH                                                                               | Benchmarked         |
| P49411 | GTP_EFTU~GTP_EFTU_D2~GTP_EFTU_D3                                                          | GTP_EFTU~GTP_EFTU_D2~GTP_EFTU_D3                                                            | Benchmarked         |
| P47897 | tRNA_synt_1c_R1~tRNA_synt_1c_R2~tRNA_synt_1c~tRNA_synt_1c_C                               | tRNA_synt_1c_R1~tRNA_synt_1c_R2~tRNA_synt_1c~tRNA_synt_1c_C                                 | Benchmarked         |
| P49588 | tRNA-synt_2c~tRNA_SAD~D_HHA1                                                              | tRNA-synt_2c~tRNA_SAD~D_HHA1                                                                | Benchmarked         |
| O00425 | RRM_1~RRM_1~KH_1~KH_1~KH_1~KH_1                                                           | RRM_1~RRM_1~KH_1~KH_1~KH_1~KH_1                                                             | Benchmarked         |
| Q96M93 | dsrm~A_deamin                                                                             | dsrm~A_deamin                                                                               | Benchmarked         |
| Q5T9C2 | NT-C2                                                                                     | NT-C2                                                                                       | Benchmarked         |
| P57723 | KH_1~KH_1~KH_1                                                                            | KH_1~KH_1~KH_1                                                                              | Benchmarked         |
| P26639 | tRNA_SAD~tRNA-                                                                            | TGS~tRNA_SAD~tRN                                                                            | Benchmarked         |

|        |                                                                                                 |                                                                                              |                 |
|--------|-------------------------------------------------------------------------------------------------|----------------------------------------------------------------------------------------------|-----------------|
|        | synt_2b~HGTP_anticodon                                                                          | A-synt_2b~HGTP_anticodon                                                                     |                 |
| Q14191 | DNA_pol_A_exo1~DEAD~HRDC                                                                        | DNA_pol_A_exo1~DEAD~Helicase_C~RecQ_Zn_bind~RQC~HRDC~HTH_40                                  | Benchmarked     |
| Q9UHI6 | DEAD                                                                                            | DEAD~Helicase_C                                                                              | Benchmarked     |
| O60381 | AXH                                                                                             | AXH~HMG_box                                                                                  | Benchmarked     |
| Q9BYX4 | DEAD~RIG-I_C-RD                                                                                 | CARD_2~CARD_2~ResIII~Helicase_C~RIG-I_C-RD                                                   | Benchmarked     |
| Q92499 | DEAD                                                                                            | DEAD~Helicase_C                                                                              | Benchmarked     |
| P29728 | OAS1_C~OAS1_C                                                                                   | NTP_transf_2~OAS1_C~NTP_transf_2~OAS1_C                                                      | Benchmarked     |
| Q13395 | SpoU_methylase                                                                                  | SpoU_methylase                                                                               | Benchmarked     |
| O14730 | RIO1                                                                                            | RIO1                                                                                         | Benchmarked     |
| O60832 | TruB_N~TruB_C_2~PUA                                                                             | DKCLD~TruB_N~TruB_C_2~PUA                                                                    | Benchmarked     |
| Q86TM3 | KH_1~DEAD                                                                                       | KH_1~DEAD~Helicase_C                                                                         | Benchmarked     |
| Q9HCE5 | MT-A70                                                                                          | MT-A70                                                                                       | Benchmarked     |
| Q66K41 | zf-met~zf-met~zf-met                                                                            | zf-met~zf-met~zf-met                                                                         | Benchmarked     |
| Q8IWZ8 | Surp~Surp~G-patch                                                                               | Surp~Surp~G-patch                                                                            | Benchmarked     |
| O00178 | GTP_EFTU                                                                                        | GTP_EFTU                                                                                     | Benchmarked     |
| Q8NHU6 | OST-HTH~OST-HTH                                                                                 | OST-HTH~OST-HTH~TUDOR~TUDOR~TUDOR                                                            | Benchmarked     |
| O75534 | CSD~CSD~CSD~CSD~S1-like~CSD~CSD~SUZ-C                                                           | CSD~CSD~CSD~CSD~S1-like~CSD~CSD~SUZ-C                                                        | Benchmarked     |
| P62314 | LSM                                                                                             | LSM                                                                                          | Benchmarked     |
| P18583 | G-patch                                                                                         | RSRP~G-patch                                                                                 | Benchmarked     |
| Q99973 | TROVE                                                                                           | TEP1_N~TEP1_N~TEP1_N~TEP1_N~TROVE~DUF4062~NACHT~WD40~WD40~WD40~WD40                          | Benchmarked     |
| Q9H3R0 | JmjC                                                                                            | JmjN~JmjC~PHD_2~zf-HC5HC2H_2                                                                 | Benchmarked     |
| Q8IYX4 | RRM_1~RRM_1                                                                                     | RRM_1~RRM_1~DND1_DSRM                                                                        | Benchmarked     |
| A2PYH4 | DEAD                                                                                            | DEAD~Helicase_C~Sec63                                                                        | Benchmarked     |
| Q96H40 | zf-C2H2_jaz~zf-C2H2_jaz~zf-C2H2_jaz~zf-C2H2_jaz~zf-C2H2_jaz~zf-C2H2_jaz~zf-C2H2_jaz~zf-C2H2_jaz | KRAB~zf-H2C2_2~zf-C2H2~zf-H2C2_2~zf-H2C2_2~zf-H2C2_2~zf-H2C2_2~zf-H2C2_2~zf-H2C2_2~zf-H2C2_2 | Not Benchmarked |
| P19474 | zf-C3HC4                                                                                        | zf-C3HC4_4~PRY~SPRY                                                                          | Not Benchmarked |
| P49590 | HGTP_anticodon                                                                                  | tRNA-synt_His~HGTP_anticodon                                                                 | Benchmarked     |

|        |                                                          |                                                                         |                 |
|--------|----------------------------------------------------------|-------------------------------------------------------------------------|-----------------|
|        |                                                          | on                                                                      |                 |
| O60841 | GTP_EFTU~GTP_EFTU_D2~IF-2~GTP_EFTU_D2                    | GTP_EFTU~IF-2~GTP_EFTU_D4                                               | Not Benchmarked |
| P49591 | tRNA-synt_2b                                             | Seryl_tRNA_N~tRNA-synt_2b                                               | Benchmarked     |
| O75153 | eIF3_p135                                                | CLU_N~CLU~eIF3_p135~TPR_12~TPR_12                                       | Benchmarked     |
| Q9NXZ2 | KH_1~DEAD                                                | KH_1~DEAD~Helicase_C                                                    | Benchmarked     |
| P26378 | RRM_1~RRM_1~RRM_1                                        | RRM_1~RRM_1~RRM_1                                                       | Benchmarked     |
| P05198 | S1                                                       | S1~EIF_2_alpha                                                          | Benchmarked     |
| Q12904 | tRNA_bind                                                | tRNA_bind                                                               | Benchmarked     |
| O75643 | DEAD~DEAD                                                | DEAD~Helicase_C~Sec63~DEAD~Helicase_C~Sec63                             | Benchmarked     |
| Q96F86 | YjeF_N                                                   | Edc3_linker~FDF~YjeF_N                                                  | Benchmarked     |
| Q5H9K5 | zf-met~zf-met~zf-met                                     | zf-met~zf-met~zf-met                                                    | Benchmarked     |
| Q96J94 | PAZ~Piwi                                                 | GAGE~PAZ~Piwi                                                           | Benchmarked     |
| P62495 | eRF1_1~eRF1_2~eRF1_3                                     | eRF1_1~eRF1_2~eRF1_3                                                    | Benchmarked     |
| Q9BQ52 | Lactamase_B_4                                            | Lactamase_B_4~Lactamase_B_2                                             | Benchmarked     |
| O43414 | RNase_T                                                  | RNase_T                                                                 | Benchmarked     |
| P21399 | Aconitase                                                | Aconitase~Aconitase_C                                                   | Benchmarked     |
| Q8IUX4 | APOBEC_N~APOBEC_N                                        | APOBEC_N~APOBEC_N                                                       | Benchmarked     |
| P35269 | TFIIF_alpha                                              | TFIIF_alpha                                                             | Benchmarked     |
| Q07955 | RRM_1~RRM_1                                              | RRM_1~RRM_1                                                             | Benchmarked     |
| Q05516 | zf-C2H2_jaz~zf-C2H2_jaz~zf-C2H2_jaz~zf-met~zf-met~zf-met | BTB~zf-H2C2_2~zf-C2H2_6~zf-C2H2~zf-C2H2_6~zf-H2C2_2~zf-H2C2_2~zf-H2C2_2 | Not Benchmarked |
| O43310 | MIF4G                                                    | MIF4G                                                                   | Benchmarked     |
| Q9UIJ7 | ADK_lid                                                  | ADK                                                                     | Not Benchmarked |
| P27144 | ADK_lid                                                  | ADK                                                                     | Not Benchmarked |
| Q9NVR5 | PIH1                                                     | PIH1                                                                    | Benchmarked     |
| Q15046 | tRNA_anti-codon~tRNA-synt_2                              | tRNA_anti-codon~tRNA-synt_2                                             | Benchmarked     |
| Q15306 | IRF-3                                                    | IRF~IRF-3                                                               | Benchmarked     |
| P41250 | tRNA-synt_2b~HGTP_anticodon                              | WHEP-TRS~HGTP_anticodon                                                 | Benchmarked     |
| Q9BXT4 | SMN~SMN~SMN~SMN                                          | zf-MYND~TUDOR~TUDOR~TUDOR~TUDOR                                         | Not Benchmarked |
| Q86U44 | MT-A70                                                   | MT-A70                                                                  | Benchmarked     |
| Q9NXH9 | TRM                                                      | TRM                                                                     | Benchmarked     |
| P26640 | tRNA-synt_1~Anticodon_1                                  | GST_C~tRNA-synt_1~Anticodon_1                                           | Benchmarked     |
| P33240 | RRM_1~CSTF_C                                             | RRM_1~CSTF2_hinge~CSTF_C                                                | Benchmarked     |

|        |                                                                         |                                                                  |                 |
|--------|-------------------------------------------------------------------------|------------------------------------------------------------------|-----------------|
| P54136 | DALR_1                                                                  | Arg_tRNA_synt_N~tRNA-synt_1d~DALR_1                              | Benchmarked     |
| Q9Y235 | APOBEC_N                                                                | APOBEC_N                                                         | Benchmarked     |
| Q9BRX2 | eRF1_1~eRF1_2~eRF1_3                                                    | eRF1_1~eRF1_2~eRF1_3                                             | Benchmarked     |
| Q96EK9 | KTI12                                                                   | KTI12                                                            | Benchmarked     |
| O43167 | zf-C2H2_jaz~zf-C2H2_jaz~zf-C2H2_jaz~zf-met~zf-met~zf-C2H2_jaz~zf-met    | BTB~zf-H2C2_2~zf-H2C2_2~zf-H2C2_2~zf-H2C2_2~zf-H2C2_2~zf-H2C2_2  | Not Benchmarked |
| P52701 | MutS_II                                                                 | PWWP~MutS_I~MutS_I I~MutS_III~MutS_V                             | Benchmarked     |
| P09234 | zf-U1                                                                   | zf-U1                                                            | Benchmarked     |
| P29083 | TFIIE_alpha                                                             | TFIIE_alpha~TF_Zn_Ribbon~TFIIE-A_C                               | Benchmarked     |
| Q4G0J3 | La~RRM_1~RRM_3                                                          | La~RRM_1~RRM_3                                                   | Benchmarked     |
| P31483 | RRM_1~RRM_1~RRM_1                                                       | RRM_1~RRM_1~RRM_1                                                | Benchmarked     |
| O00267 | Spt5_N~Spt5-NGN                                                         | Spt5_N~Spt5-NGN~KOW~KOW~KOW~KOW~KOW~KOW                          | Benchmarked     |
| O00566 | Mpp10                                                                   | Mpp10                                                            | Benchmarked     |
| Q14232 | IF-2B                                                                   | IF-2B                                                            | Benchmarked     |
| Q9UBB9 | G-patch                                                                 | TIP_N~G-patch~GCFC                                               | Benchmarked     |
| P10073 | zf-C2H2_jaz~zf-C2H2_jaz~zf-C2H2_jaz~zf-C2H2_jaz~zf-C2H2_jaz~zf-C2H2_jaz | SCAN~zf-H2C2_2~zf-H2C2_2~zf-H2C2_2~zf-H2C2_2~zf-H2C2_2~zf-H2C2_2 | Not Benchmarked |
| Q05823 | Ribonuc_2-5A                                                            | Ank_2~Ank_2~Ank_2~Ank_2~Pkinase~Ribonuc_2-5A                     | Benchmarked     |
| Q9BXS6 | NUSAP                                                                   | NUSAP                                                            | Benchmarked     |
| Q9Y2P8 | RTC                                                                     | RTC                                                              | Benchmarked     |
| Q9Y6K5 | OAS1_C~OAS1_C~OAS1_C                                                    | NTP_transf_2~OAS1_C~NTP_transf_2~OAS1_C~NTP_transf_2~OAS1_C      | Benchmarked     |
| P98175 | RRM_6~RRM_6~G-patch                                                     | RRM_6~RRM_6~G-patch                                              | Benchmarked     |
| P62316 | LSM                                                                     | LSM                                                              | Benchmarked     |
| Q9HA38 | zf-met~zf-met~zf-C2H2_jaz                                               | zf-met~zf-met~zf-C2H2_jaz                                        | Benchmarked     |
| Q9BRS2 | RIO1                                                                    | RIO1                                                             | Benchmarked     |
| Q86XP3 | DEAD                                                                    | DEAD~Helicase_C                                                  | Benchmarked     |
| Q9BYD3 | Ribosomal_L4                                                            | Ribosomal_L4                                                     | Benchmarked     |
| P52756 | RRM_6~RRM_6~G-patch                                                     | RRM_6~zf-RanBP~RRM_6~G-patch                                     | Benchmarked     |
| Q96I24 | KH_1~KH_1~KH_1~KH_1                                                     | KH_1~KH_1~KH_1~KH_1                                              | Benchmarked     |
| P08579 | RRM_5~RRM_1                                                             | RRM_5~RRM_1                                                      | Benchmarked     |



|        |                                         |                                                                         |                 |
|--------|-----------------------------------------|-------------------------------------------------------------------------|-----------------|
|        |                                         | K~Apt1                                                                  |                 |
| P23246 | RRM_1~RRM_1                             | RRM_1~RRM_1~NOPS                                                        | Benchmarked     |
| P54132 | DEAD~HRDC                               | BLM_N~BDHCT~BDHCT_assoc~DEAD~Helicase_C~RecQ_Zn_bind~RQC~HRDC           | Benchmarked     |
| Q86TW2 | ABC1                                    | ABC1                                                                    | Benchmarked     |
| Q9BRA0 | LSM                                     | LSM                                                                     | Benchmarked     |
| Q92793 | Creb_binding                            | zf-TAZ~KIX~Bromodomain~DUF902~HAT_KAT11~ZZ~zf-TAZ~Creb_binding          | Benchmarked     |
| Q9NQ50 | MRP-L28                                 | MRP-L28                                                                 | Benchmarked     |
| Q9H0A0 | Helicase_RecD~tRNA_bind_2               | DUF1726~Helicase_RecD~GNAT_acetyltr_2~tRNA_bind_2                       | Benchmarked     |
| Q14653 | IRF-3                                   | IRF~IRF-3                                                               | Benchmarked     |
| P23588 | RRM_1                                   | RRM_1                                                                   | Benchmarked     |
| Q9NPD3 | RNase_PH                                | RNase_PH                                                                | Benchmarked     |
| Q9P2I0 | Beta-Casp~RMMBL                         | Lactamase_B_6~Beta-Casp~RMMBL~CPSF100_C                                 | Benchmarked     |
| Q96JY0 | Maelstrom                               | HMG_box_2~Maelstrom                                                     | Benchmarked     |
| Q9P2N5 | RRM_6                                   | RRM_6                                                                   | Benchmarked     |
| Q9BVS4 | RIO1                                    | Rio2_N~RIO1                                                             | Benchmarked     |
| P29375 | JmjC                                    | JmjN~ARID~PHD~JmjC~zf-C5HC2~PLU-1~PHD~PHD                               | Benchmarked     |
| Q07617 | RPAP3_C                                 | TPR_11~TPR_9~TPR_11~TPR_1~TPR_11~TPR_1~TPR_1~RPAP3_C                    | Benchmarked     |
| Q9H583 | U3snoRNP10~U3snoRNP10~BP28CT            | U3snoRNP10~HEAT~U3snoRNP10~BP28CT~HEAT                                  | Benchmarked     |
| Q6ZN17 | CSD                                     | CSD                                                                     | Benchmarked     |
| A2AJT9 | THRAP3_BCLAF1                           | THRAP3_BCLAF1                                                           | Benchmarked     |
| P43034 | Nup160~Nup160~Nup160~Nup160~Nup160      | WD40~WD40~WD40~WD40~WD40~WD40~WD40~WD40                                 | Not Benchmarked |
| P41182 | zf-C2H2_jaz~zf-met~zf-met~zf-met~zf-met | BTB~zf-H2C2_2~zf-C2H2~zf-H2C2_2~zf-H2C2_2~zf-H2C2_2~zf-H2C2_2~zf-H2C2_2 | Not Benchmarked |
| P05455 | La~RRM_1~RRM_3                          | La~RRM_1~RRM_3                                                          | Benchmarked     |
| O14607 | JmjC                                    | TPR_11~TPR_11~TPR_1~TPR_8~TPR_11~TPR_11~JmjC                            | Benchmarked     |
| Q01780 | DNA_pol_A_exo1~HRDC                     | PMC2NT~DNA_pol_A_exo1~HRDC                                              | Benchmarked     |
| P36578 | Ribosomal_L4                            | Ribosomal_L4~Ribos_L4_asso_C                                            | Benchmarked     |
| Q13901 | Sas10_Utp3                              | Sas10_Utp3                                                              | Benchmarked     |
| O75891 | Formyl_trans_N                          | Formyl_trans_N~Formyl                                                   | Benchmarked     |



|        |                                     |                                                                 |                 |
|--------|-------------------------------------|-----------------------------------------------------------------|-----------------|
| Q8NDI1 | NT-C2                               | NT-C2~CH~DUF3585                                                | Benchmarked     |
| P62318 | LSM                                 | LSM                                                             | Benchmarked     |
| Q96GQ7 | DEAD                                | DEAD~Helicase_C                                                 | Benchmarked     |
| Q13206 | DEAD                                | DEAD~Helicase_C~DUF4217                                         | Benchmarked     |
| Q8TDP1 | RNase_H2_suC                        | RNase_H2_suC                                                    | Benchmarked     |
| Q9UPY3 | DEAD~Dicer_dimer~PAZ                | ResIII~Helicase_C~Dicer_dimer~PAZ~Ribonuclease_3~Ribonuclease_3 | Not Benchmarked |
| P38159 | RRM_1~RBM1CTR                       | RRM_1~RBM1CTR                                                   | Benchmarked     |
| Q9Y450 | HBS1_N~GTP_EFTU~GTP_EFTU_D3         | HBS1_N~GTP_EFTU~GTP_EFTU_D3                                     | Benchmarked     |
| O95453 | CAF1                                | CAF1~RNA_bind                                                   | Benchmarked     |
| P09012 | RRM_1~RRM_1                         | RRM_1~RRM_1                                                     | Benchmarked     |
| O95260 | ATE_N~ATE_C                         | ATE_N~ATE_C                                                     | Benchmarked     |
| P52597 | RRM_6~RRM_1~RRM_6                   | RRM_6~RRM_1~zf-RNPHF~RRM_6                                      | Benchmarked     |
| O75569 | dsrm~dsrm~Staufen_C                 | dsrm~dsrm~dsrm                                                  | Not Benchmarked |
| P41238 | APOBEC_N                            | APOBEC_N                                                        | Benchmarked     |
| P26599 | RRM_5~RRM_1~RRM_5~RRM_6             | RRM_5~RRM_1~RRM_5~RRM_6                                         | Benchmarked     |
| O75164 | JmjC                                | JmjN~JmjC~PHD_2~zf-HC5HC2H_2                                    | Benchmarked     |
| P43246 | MutS_II                             | MutS_I~MutS_II~MutS_III~MutS_V                                  | Benchmarked     |
| Q9H4Q4 | zf-C2H2_jaz~zf-C2H2_jaz~zf-C2H2_jaz | zf-H2C2_2~zf-H2C2_2                                             | Benchmarked     |
| Q6IN84 | SpoU_sub_bind~SpoU_methylase        | SpoU_sub_bind~SpoU_methylase                                    | Benchmarked     |
| Q9BXR3 | RVT_1~RNase_H                       | RVT_1~RVT_thumb~RNase_H~Integrase_Zn~reve                       | Benchmarked     |
| O94901 | MRP                                 | MRP~Sad1_UNC                                                    | Benchmarked     |
| Q9NYY8 | RAP                                 | FAST_1~RAP                                                      | Benchmarked     |
| O15054 | JmjC                                | JmjC                                                            | Benchmarked     |
| Q12788 | Utp13                               | WD40~WD40~WD40~WD40~WD40~WD40~WD40~Utp13                        | Benchmarked     |
| O15226 | G-patch                             | G-patch~R3H                                                     | Benchmarked     |
| P55199 | ELL~Occludin_ELL                    | ELL~Occludin_ELL                                                | Benchmarked     |
| P41252 | tRNA-synt_1~Anticodon_1             | tRNA-synt_1~Anticodon_1                                         | Benchmarked     |
| P35637 | RRM_1                               | RRM_1~zf-RanBP                                                  | Benchmarked     |
| Q969S9 | GTP_EFTU                            | GTP_EFTU~EFG_II~EFG_IV~EFG_C                                    | Benchmarked     |
| P26368 | RRM_6~RRM_1~RRM_1                   | RRM_6~RRM_1~RRM_1                                               | Benchmarked     |
| Q9ULH7 | SAP                                 | RPEL~RPEL~RPEL~SAP                                              | Benchmarked     |
| P19525 | dsrm~dsrm                           | dsrm~dsrm~Pkinase                                               | Benchmarked     |
| P78344 | MIF4G                               | MIF4G~MA3~W2                                                    | Benchmarked     |
| Q9BUI4 | HTH_9~RNA_pol_Rpc82~HTH_9           | HTH_9~RNA_pol_Rpc82                                             | Benchmarked     |



|        |                                                                                           |                                                                                           |             |
|--------|-------------------------------------------------------------------------------------------|-------------------------------------------------------------------------------------------|-------------|
| O60942 | mRNA_cap_enzyme~mRNA_cap_C                                                                | DSPc~mRNA_cap_enzyme~mRNA_cap_C                                                           | Benchmarked |
| Q9Y2R4 | DEAD                                                                                      | DEAD~Helicase_C                                                                           | Benchmarked |
| Q69384 | HERV-K_REC                                                                                | HERV-K_REC~HERV-K_env_2~GP41                                                              | Benchmarked |
| Q9UHL0 | DEAD                                                                                      | DEAD~Helicase_C                                                                           | Benchmarked |
| P27694 | tRNA_anti-codon                                                                           | Rep-A_N~tRNA_anti-codon~REPA_OB_2~Rep_fac-A_C                                             | Benchmarked |
| P30876 | RNA_pol_Rpb2_1~RNA_pol_Rpb2_3~RNA_pol_Rpb2_4~RNA_pol_Rpb2_5~RNA_pol_Rpb2_6~RNA_pol_Rpb2_7 | RNA_pol_Rpb2_1~RNA_pol_Rpb2_3~RNA_pol_Rpb2_4~RNA_pol_Rpb2_5~RNA_pol_Rpb2_6~RNA_pol_Rpb2_7 | Benchmarked |
| Q9H074 | MIF4G                                                                                     | MIF4G                                                                                     | Benchmarked |
| Q15031 | tRNA-synt_1~tRNA-synt_1~tRNA-synt_1~Anticodon_1                                           | tRNA-synt_1~tRNA-synt_1~tRNA-synt_1~Anticodon_1                                           | Benchmarked |
| Q86XN8 | KH_1~KH_1                                                                                 | KH_1~KH_1~zf-C3HC4_3                                                                      | Benchmarked |
| P41229 | JmjC                                                                                      | JmjN~ARID~PHD~JmjC~zf-C5HC2~PLU-1~PHD~PLU-1                                               | Benchmarked |
| Q902F8 | HERV-K_REC                                                                                | HERV-K_REC~HERV-K_env_2~GP41                                                              | Benchmarked |
| Q99613 | eIF-3c_N                                                                                  | eIF-3c_N~PCI                                                                              | Benchmarked |
